# Supplementary material for: The transcription start site landscape of C. elegans
Source: HighWire-hosted journal article supplement (doi:10.1101/gr.151571.112), 2013-05-01
Supplement: Supplemental_Table_S2.xlsx [file Supplemental_Table_S2.xlsx]

## Sheet: representative TSSs
URL	ID	TSS type	common gene name	gene name	chr	start position	strand	number of aligned reads in the best-fit Gaussian distribution	standard deviation of the best-fit Gaussian distribution	distance to the start codon	distance to the proximal SL1 site	other gene names (or overlapped genes)
UTGB	GTSSWE200001.05	outron	Y74C9A.3	Y74C9A.3.1	chrI	10640	-	29	0	491	409	CE28146 | WBGene00022277 | WP:CE28146 | Y74C9A.3 | Y74C9A.3.1 | Y74C9A.3.2
UTGB	GTSSWE200002.01	outron	nlp-40	Y74C9A.2.1	chrI	11285	+	16	3.039	356	333	CE24660 | WBGene00022276 | WP:CE24660 | Y74C9A.2 | Y74C9A.2.1 | Y74C9A.2.2 | Y74C9A.2.3 | Y74C9A.2.4 | Y74C9A.2.5 | Y74C9A.2.6 | nlp-40
UTGB	GTSSWE200003.04	outron	Y74C9A.4	Y74C9A.4b	chrI	27287	-	30	0	508	505	CE24662 | CE28147 | WBGene00022278 | WP:CE24662 | WP:CE28147 | Y74C9A.4 | Y74C9A.4a | Y74C9A.4b
UTGB	GTSSWE200005.02	exon	Y74C9A.1	Y74C9A.1	chrI	43530	+	17	0	203	-1	CE34428 | WBGene00022275 | WP:CE34428 | Y74C9A.1
UTGB	GTSSWE200006.05	outron	Y48G1C.12	Y48G1C.12	chrI	47202	+	50	0.6808	270	261	CE38647 | WBGene00044345 | WP:CE38647 | Y48G1C.12
UTGB	GTSSWE200007.07	outron	pgs-1	Y48G1C.4	chrI	49587	+	29	0	334	334	CE30021 | WBGene00021677 | WP:CE30021 | Y48G1C.4 | pgs-1
UTGB	GTSSWE200010.03	outron	Y48G1C.6	Y48G1C.6	chrI	86355	-	28	3.53	70	61	CE22175 | WBGene00021679 | WP:CE22175 | Y48G1C.6
UTGB	GTSSWE200011.16	outron	Y48G1C.11	Y48G1C.11	chrI	86559	+	26	0	282	265	CE39531 | WBGene00021684 | WP:CE39531 | Y48G1C.11
UTGB	GTSSWE200012.08	outron	Y48G1C.9	Y48G1C.9.2	chrI	91237	+	79	16.21	172	167	CE38571 | WBGene00021682 | WP:CE38571 | Y48G1C.9 | Y48G1C.9.1 | Y48G1C.9.2
UTGB	GTSSWE200013.01	outron	Y48G1C.1	Y48G1C.1	chrI	93029	+	270	15.79	63	54	CE30019 | WBGene00021676 | WP:CE30019 | Y48G1C.1
UTGB	GTSSWE200014.03	exon	Y48G1C.7	Y48G1C.7	chrI	100692	-	34	0	78	-1	CE27266 | WBGene00021680 | WP:CE27266 | Y48G1C.7
UTGB	GTSSWE200016.13	outron	rab-11.1	F53G12.1	chrI	110307	-	65	1.697	262	249	CE11006 | F53G12.1 | F53G12.1.1 | F53G12.1.2 | WBGene00004274 | WP:CE11006 | rab-11.1
UTGB	GTSSWE200017.03	outron	rpl-7	F53G12.10.2	chrI	110784	+	433	7.106	271	254	CE11024 | F53G12.10 | F53G12.10.1 | F53G12.10.2 | F53G12.10.3 | F53G12.10.4 | F53G12.10.5 | WBGene00004418 | WP:CE11024 | rpl-7
UTGB	GTSSWE200018.04	exon	F53G12.9	F53G12.9	chrI	112285	+	36	5.047	80	-1	CE40459 | F53G12.9 | WBGene00018774 | WP:CE40459
UTGB	GTSSWE200019.01	exon	col-45	F53G12.7	chrI	114855	+	12	0	884	-1	CE11018 | F53G12.7 | WBGene00000622 | WP:CE11018 | col-45
UTGB	GTSSWE200020.01	outron	mex-3	F53G12.5b	chrI	126113	+	19	0	1184	1179	CE11014 | CE25000 | F53G12.5 | F53G12.5a | F53G12.5a.1 | F53G12.5a.2 | F53G12.5b | WBGene00003229 | WP:CE11014 | WP:CE25000 | mex-3
UTGB	GTSSWE200021.16	exon	F53G12.4	F53G12.4	chrI	133978	+	264	9.794	376	-1	CE42005 | F53G12.4 | WBGene00018772 | WP:CE42005
UTGB	GTSSWE200022.01	exon	F53G12.11	F53G12.11	chrI	145742	-	14	0	114	-1	CE11026 | F53G12.11 | WBGene00018775 | WP:CE11026
UTGB	GTSSWE200023.06	outron	bli-3	F56C11.1	chrI	155975	-	33	0	1155	1126	CE28463 | F56C11.1 | WBGene00000253 | WP:CE28463 | bli-3 | duox-1 | tag-31
UTGB	GTSSWE200024.02	outron	ptr-11	F56C11.2	chrI	169711	-	22	0	2894	2891	CE17902 | F56C11.2 | WBGene00004225 | WP:CE17902 | ptr-11
UTGB	GTSSWE200025.01	outron	F56C11.6	F56C11.6a	chrI	171267	+	81	14.07	2155	2145	CE17905 | CE33402 | F56C11.6 | F56C11.6a | F56C11.6b | WBGene00018958 | WP:CE17905 | WP:CE33402
UTGB	GTSSWE200026.04	outron	F56C11.5	F56C11.5b	chrI	177539	+	107	0.487	1028	987	CE34322 | CE42006 | F56C11.5 | F56C11.5a | F56C11.5b | WBGene00018957 | WP:CE34322 | WP:CE42006
UTGB	GTSSWE200027.01	outron	F56C11.3	F56C11.3	chrI	182942	-	34	0.6656	170	169	CE17903 | F56C11.3 | WBGene00018955 | WP:CE17903
UTGB	GTSSWE200028.10	outron	F56C11.4	F56C11.4	chrI	183342	+	84	1.913	34	22	CE30543 | F56C11.4 | WBGene00018956 | WP:CE30543
UTGB	GTSSWE200029.01	outron	K10E9.1	K10E9.1	chrI	189094	+	21	0	560	551	CE18050 | K10E9.1 | WBGene00019634 | WP:CE18050
UTGB	GTSSWE200030.01	exon	atm-1	Y48G1BL.2	chrI	202979	+	27	0	58	-1	CE30018 | WBGene00000227 | WP:CE30018 | Y48G1BL.2 | atm-1
UTGB	GTSSWE200031.08	exon	Y48G1BL.7	Y48G1BL.7	chrI	208163	+	44	3.397	1157	-1	CE42498 | WBGene00021666 | WP:CE42498 | Y48G1BL.7
UTGB	GTSSWE200032.02	exon	Y48G1BL.1	Y48G1BL.1	chrI	215969	+	23	0	212	-1	CE27784 | WBGene00021662 | WP:CE27784 | Y48G1BL.1
UTGB	GTSSWE200033.02	exon	Y48G1BL.6	Y48G1BL.6	chrI	221583	-	11	0	8	-1	CE44881 | WBGene00021665 | WP:CE44881 | Y48G1BL.6
UTGB	GTSSWE200034.02	exon	Y48G1BM.7	Y48G1BM.7	chrI	240325	-	121	1.224	1303	-1	CE26115 | WBGene00021672 | WP:CE26115 | Y48G1BM.7
UTGB	GTSSWE200035.02	exon	Y48G1BM.8	Y48G1BM.8	chrI	252505	-	1914	0	924	-1	CE26114 | WBGene00021673 | WP:CE26114 | Y48G1BM.8
UTGB	GTSSWE200036.01	exon	Y48G1BM.9	Y48G1BM.9	chrI	256678	-	14	0	71	-1	CE39296 | WBGene00021674 | WP:CE39296 | Y48G1BM.9
UTGB	GTSSWE200037.02	outron	Y48G1BR.1	Y48G1BR.1	chrI	261423	-	28	0	2267	2265	CE37432 | WBGene00021675 | WP:CE37432 | Y48G1BR.1
UTGB	GTSSWE200038.08	outron	C53D5.3	C53D5.3	chrI	279714	+	28	1.89	406	406	C53D5.3 | CE20607 | WBGene00016904 | WP:CE20607
UTGB	GTSSWE200039.12	exon	C53D5.2	C53D5.2	chrI	283405	+	36	2.724	95	-1	C53D5.2 | CE34279 | WBGene00016903 | WP:CE34279
UTGB	GTSSWE200040.01	exon	ztf-3	C53D5.4	chrI	289128	-	395	5.838	52	-1	C53D5.4 | CE23611 | WBGene00016905 | WP:CE23611 | ztf-3
UTGB	GTSSWE200041.05	outron	C53D5.1	C53D5.1a	chrI	289237	+	178	5.873	2012	1979	C53D5.1 | C53D5.1a | C53D5.1b | C53D5.1c | C53D5.1c.1 | C53D5.1c.2 | C53D5.1d | CE23609 | CE27883 | CE27884 | CE44411 | WBGene00016902 | WP:CE23609 | WP:CE27883 | WP:CE27884 | WP:CE44411
UTGB	GTSSWE200042.18	outron	C53D5.5	C53D5.5.1	chrI	310951	-	438	0.4319	162	147	C53D5.5 | C53D5.5.1 | C53D5.5.2 | CE23612 | WBGene00016906 | WP:CE23612
UTGB	GTSSWE200043.16	outron	imb-3	C53D5.6	chrI	315176	-	220	9.109	196	185	C53D5.6 | C53D5.6.1 | C53D5.6.2 | CE26971 | WBGene00002077 | WP:CE26971 | imb-3
UTGB	GTSSWE200044.04	outron	xpo-2	Y48G1A.5	chrI	323502	-	143	15.85	148	148	CE27001 | WBGene00002079 | WP:CE27001 | Y48G1A.5 | imb-5 | xpo-2
UTGB	GTSSWE200045.06	outron	Y48G1A.4	Y48G1A.4	chrI	323789	+	52	1.356	72	67	CE27000 | WBGene00021660 | WP:CE27000 | Y48G1A.4
UTGB	GTSSWE200046.02	outron	Y48G1A.3	Y48G1A.3	chrI	331191	+	36	1.153	1423	1421	CE26999 | WBGene00021659 | WP:CE26999 | Y48G1A.3
UTGB	GTSSWE200048.02	outron	Y48G1A.2	Y48G1A.2	chrI	347484	+	306	1.332	94	27	CE26998 | WBGene00021658 | WP:CE26998 | Y48G1A.2 | Y48G1A.2.1 | Y48G1A.2.2
UTGB	GTSSWE200047.02	exon	mbtr-1	Y48G1A.6a	chrI	348400	-	90	1.701	32	-1	CE41949 | CE41950 | WBGene00021661 | WP:CE41949 | WP:CE41950 | Y48G1A.6 | Y48G1A.6a | Y48G1A.6b | mbtr-1
UTGB	GTSSWE200049.06	outron	Y48G1A.1	Y48G1A.1	chrI	348493	+	119	1.044	45	29	CE40283 | WBGene00021657 | WP:CE40283 | Y48G1A.1
UTGB	GTSSWE200050.02	outron	R119.1	R119.1	chrI	366256	-	33	0	2351	2345	CE25971 | R119.1 | WBGene00020087 | WP:CE25971
UTGB	GTSSWE200051.02	outron	rnp-8	R119.7	chrI	364354	+	24	1.318	168	166	CE18161 | R119.7 | WBGene00020091 | WP:CE18161 | rnp-8
UTGB	GTSSWE200052.02	exon	R119.2	R119.2	chrI	373440	-	30	0	1803	-1	CE34356 | R119.2 | WBGene00020088 | WP:CE34356
UTGB	GTSSWE200054.01	outron	R119.3	R119.3	chrI	379179	-	12	0	106	102	CE28758 | R119.3 | R119.3.1 | R119.3.2 | WBGene00020089 | WP:CE28758
UTGB	GTSSWE200053.02	outron	pqn-59	R119.4	chrI	382469	-	421	0.7936	564	563	CE23925 | R119.4 | R119.4.1 | R119.4.2 | WBGene00004143 | WP:CE23925 | pqn-59 | prp-1
UTGB	GTSSWE200055.08	outron	taf-4	R119.6	chrI	382590	+	579	1.378	246	241	CE39613 | R119.6 | WBGene00006385 | WP:CE39613 | taf-4
UTGB	GTSSWE200056.07	outron	R119.5	R119.5	chrI	395255	-	82	1.506	840	838	CE44884 | R119.5 | WBGene00020090 | WP:CE44884
UTGB	GTSSWE200058.01	outron	C07F11.2	C07F11.2	chrI	418504	+	74	0	2433	2425	C07F11.2 | CE23528 | WBGene00015570 | WP:CE23528
UTGB	GTSSWE200060.18	outron	W04C9.4	W04C9.4	chrI	461391	+	212	4.817	612	607	CE18335 | W04C9.4 | W04C9.4.1 | W04C9.4.2 | WBGene00021026 | WP:CE18335
UTGB	GTSSWE200061.02	exon	cutl-13	W04C9.3	chrI	477586	+	392	10.69	120	-1	CE34388 | W04C9.3 | WBGene00021025 | WP:CE34388 | cutl-13
UTGB	GTSSWE200062.02	outron	W04C9.2	W04C9.2	chrI	488483	+	39	3.332	136	127	CE18333 | W04C9.2 | W04C9.2.1 | W04C9.2.2 | WBGene00021024 | WP:CE18333
UTGB	GTSSWE200063.06	exon	haf-4	W04C9.1	chrI	489999	+	102	8.355	55	-1	CE28355 | W04C9.1 | WBGene00001814 | WP:CE28355 | haf-4
UTGB	GTSSWE200064.01	outron	Y65B4BL.3	Y65B4BL.3	chrI	502069	-	19	0	35	23	CE44080 | WBGene00022035 | WP:CE44080 | Y65B4BL.3
UTGB	GTSSWE200065.08	outron	Y65B4BL.4	Y65B4BL.4	chrI	506239	-	44	4.664	23	16	CE22745 | WBGene00022036 | WP:CE22745 | Y65B4BL.4
UTGB	GTSSWE200066.02	outron	deps-1	Y65B4BL.2	chrI	506443	+	115	2.259	37	31	CE25536 | WBGene00022034 | WP:CE25536 | Y65B4BL.2 | deps-1
UTGB	GTSSWE200067.09	outron	Y65B4BL.7	Y65B4BL.7	chrI	511238	-	182	5.747	397	299	CE36756 | WBGene00022039 | WP:CE36756 | Y65B4BL.7
UTGB	GTSSWE200068.11	outron	acs-13	Y65B4BL.5	chrI	518563	-	4108	0.3628	2165	2103	CE24550 | WBGene00022037 | WP:CE24550 | Y65B4BL.5 | acs-13
UTGB	GTSSWE200069.02	exon	Y65B4BL.6	Y65B4BL.6a	chrI	521354	-	27	0	1	-1	CE41959 | CE41960 | WBGene00022038 | WP:CE41959 | WP:CE41960 | Y65B4BL.6 | Y65B4BL.6a | Y65B4BL.6b
UTGB	GTSSWE200070.05	exon	Y65B4BL.1	Y65B4BL.1	chrI	530565	+	274	0.8482	4	-1	CE29898 | WBGene00022033 | WP:CE29898 | Y65B4BL.1
UTGB	GTSSWE200071.02	outron	Y65B4BR.8	Y65B4BR.8	chrI	533092	+	70	0.6573	1369	1366	CE27304 | WBGene00022043 | WP:CE27304 | Y65B4BR.8
UTGB	GTSSWE200072.06	outron	Y65B4BR.5	Y65B4BR.5b	chrI	535535	+	84	1.487	276	259	CE22740 | CE33239 | WBGene00022042 | WP:CE22740 | WP:CE33239 | Y65B4BR.5 | Y65B4BR.5a | Y65B4BR.5a.1 | Y65B4BR.5a.2 | Y65B4BR.5b
UTGB	GTSSWE200073.16	outron	wwp-1	Y65B4BR.4a	chrI	536946	+	1140	8.425	195	179	CE31384 | CE31385 | CeWWP1 | WBGene00007009 | WP:CE31384 | WP:CE31385 | Y65B4BR.4 | Y65B4BR.4a | Y65B4BR.4b | wwp-1
UTGB	GTSSWE200074.01	outron	ptr-21	Y65B4BR.3	chrI	550258	+	39	0	453	441	CE24559 | WBGene00004235 | WP:CE24559 | Y65B4BR.3 | ptr-21
UTGB	GTSSWE200075.10	exon	lpr-1	Y65B4BR.2	chrI	557451	+	1549	3.325	58	-1	CE29899 | WBGene00002393 | WP:CE29899 | Y65B4BR.2 | let-124 | lpr-1
UTGB	GTSSWE200076.01	exon	Y65B4BR.1	Y65B4BR.1	chrI	561573	+	13	0	1193	-1	CE25539 | WBGene00022040 | WP:CE25539 | Y65B4BR.1
UTGB	GTSSWE200077.01	exon	ceh-9	Y65B4BR.9	chrI	566409	-	17	0	14	-1	CE36343 | WBGene00000434 | WP:CE36343 | Y65B4BR.9 | ceh-9
UTGB	GTSSWE200078.02	exon	grl-16	Y65B4BR.6a	chrI	575096	-	21	0	26	-1	CE25541 | CE33240 | WBGene00001725 | WP:CE25541 | WP:CE33240 | Y65B4BR.6 | Y65B4BR.6a | Y65B4BR.6b | grl-16
UTGB	GTSSWE200079.01	outron	hum-7	F56A6.2	chrI	609006	-	12	0	1431	1401	CE23779 | F56A6.2 | WBGene00002040 | WP:CE23779 | hum-7
UTGB	GTSSWE200080.07	outron	F56A6.4	F56A6.4	chrI	630411	-	40	16.04	963	963	CE34319 | F56A6.4 | WBGene00018923 | WP:CE34319
UTGB	GTSSWE200081.01	outron	Y65B4A.6	Y65B4A.6	chrI	636779	-	277	10.9	441	425	CE34419 | WBGene00022029 | WP:CE34419 | Y65B4A.6
UTGB	GTSSWE200082.03	exon	vps-20	Y65B4A.3	chrI	636862	+	292	0.7823	77	-1	CE22731 | WBGene00022027 | WP:CE22731 | Y65B4A.3 | vps-20
UTGB	GTSSWE200083.02	outron	Y65B4A.2	Y65B4A.2	chrI	644855	+	16	0	601	599	CE27300 | WBGene00022026 | WP:CE27300 | Y65B4A.2 | Y65B4A.2.1 | Y65B4A.2.2
UTGB	GTSSWE200084.03	outron	Y65B4A.1	Y65B4A.1	chrI	654093	+	152	0.5437	38	30	CE27299 | WBGene00022025 | WP:CE27299 | Y65B4A.1
UTGB	GTSSWE200085.02	exon	Y65B4A.8	Y65B4A.8.1	chrI	663597	-	109	1.438	44	-1	CE31383 | WBGene00022031 | WP:CE31383 | Y65B4A.8 | Y65B4A.8.1 | Y65B4A.8.2
UTGB	GTSSWE200086.01	exon	Y65B4A.9	Y65B4A.9	chrI	666887	-	14	0	77	-1	CE22732 | WBGene00022032 | WP:CE22732 | Y65B4A.9
UTGB	GTSSWE200087.02	outron	Y18H1A.4	Y18H1A.4.1	chrI	694948	-	27	0.6746	314	294	CE29367 | WBGene00021210 | WP:CE29367 | Y18H1A.4 | Y18H1A.4.1 | Y18H1A.4.2
UTGB	GTSSWE200089.06	outron	Y18H1A.3	Y18H1A.3	chrI	716724	-	345	0.3858	870	846	CE40277 | WBGene00021209 | WP:CE40277 | Y18H1A.3
UTGB	GTSSWE200090.05	exon	Y18H1A.7	Y18H1A.7	chrI	719730	-	49	1.157	42	-1	CE33587 | WBGene00021211 | WP:CE33587 | Y18H1A.7
UTGB	GTSSWE200091.11	outron	pif-1	Y18H1A.6	chrI	720034	+	1519	0.8092	47	38	CE30311 | WBGene00004028 | WP:CE30311 | Y18H1A.6 | cePIF1 | pif-1
UTGB	GTSSWE200092.01	exon	Y18H1A.15	Y18H1A.15	chrI	737244	-	14	0	690	-1	CE38740 | WBGene00044434 | WP:CE38740 | Y18H1A.15
UTGB	GTSSWE200093.01	exon	col-46	Y18H1A.13	chrI	748445	-	22	0	2988	-1	CE44999 | WBGene00000623 | WP:CE44999 | Y18H1A.13 | col-46
UTGB	GTSSWE200094.05	exon	Y18H1A.9	Y18H1A.9	chrI	756977	-	115	0.7622	49	-1	CE30212 | WBGene00021213 | WP:CE30212 | Y18H1A.9
UTGB	GTSSWE200096.01	exon	T06A4.3	T06A4.3a	chrI	763469	+	14	0	208	-1	CE37044 | CE37045 | T06A4.3 | T06A4.3a | T06A4.3b | WBGene00020283 | WP:CE37044 | WP:CE37045
UTGB	GTSSWE200097.04	exon	T06A4.1	T06A4.1b	chrI	770943	+	63	0	26	-1	CE33169 | CE38543 | T06A4.1 | T06A4.1a | T06A4.1b | WBGene00020281 | WP:CE33169 | WP:CE38543
UTGB	GTSSWE200098.03	outron	ZC123.3	ZC123.3	chrI	802425	+	15	0	979	945	CE28153 | WBGene00022518 | WP:CE28153 | ZC123.3
UTGB	GTSSWE200099.04	outron	ZC123.1	ZC123.1	chrI	836292	+	213	0.5008	1812	1706	CE28152 | WBGene00022517 | WP:CE28152 | ZC123.1
UTGB	GTSSWE200101.12	outron	Y95B8A.8	Y95B8A.8	chrI	853393	+	248	0.9004	68	62	CE40293 | WBGene00022388 | WP:CE40293 | Y95B8A.8
UTGB	GTSSWE200102.02	exon	Y95B8A.7	Y95B8A.7	chrI	856645	+	17	0	1924	-1	CE36772 | WBGene00022387 | WP:CE36772 | Y95B8A.7 | Y95B8A.7.1 | Y95B8A.7.2 | Y95B8A.7.3 | Y95B8A.7.4
UTGB	GTSSWE200103.01	outron	Y95B8A.6	Y95B8A.6a.2	chrI	885148	+	14	0	1461	1361	CE23158 | CE33249 | WBGene00022386 | WP:CE23158 | WP:CE33249 | Y95B8A.6 | Y95B8A.6a | Y95B8A.6a.1 | Y95B8A.6a.2 | Y95B8A.6a.3 | Y95B8A.6b
UTGB	GTSSWE200104.02	exon	Y95B8A.4	Y95B8A.4	chrI	907304	+	17	1.278	191	-1	CE41603 | WBGene00022385 | WP:CE41603 | Y95B8A.4
UTGB	GTSSWE200105.01	outron	Y95B8A.2	Y95B8A.2	chrI	938490	+	12	0	137	20	CE24691 | WBGene00022383 | WP:CE24691 | Y95B8A.2 | Y95B8A.2.1 | Y95B8A.2.2
UTGB	GTSSWE200106.01	exon	nas-30	Y95B8A.1	chrI	941501	+	11	0	913	-1	CE36770 | WBGene00003548 | WP:CE36770 | Y95B8A.1 | nas-30
UTGB	GTSSWE200108.09	exon	cutl-20	F54A5.2	chrI	969408	-	270	8.327	73	-1	CE20860 | F54A5.2 | WBGene00018787 | WP:CE20860 | cutl-20
UTGB	GTSSWE200109.02	exon	shc-1	F54A5.3a	chrI	973137	-	149	2.221	82	-1	CE20862 | CE20863 | CE29391 | CE30804 | F54A5.3 | F54A5.3a | F54A5.3b | F54A5.3c | F54A5.3d | WBGene00018788 | WP:CE20862 | WP:CE20863 | WP:CE29391 | WP:CE30804 | shc-1
UTGB	GTSSWE200110.07	outron	hmbx-1	F54A5.1	chrI	989177	+	179	1.834	508	496	CE20859 | F54A5.1 | WBGene00018786 | WP:CE20859 | hmbx-1
UTGB	GTSSWE200111.01	exon	C54G6.2	C54G6.2	chrI	1001081	+	25	0	2810	-1	C54G6.2 | CE36636 | WBGene00016931 | WP:CE36636
UTGB	GTSSWE200112.04	exon	C54G6.1	C54G6.1a	chrI	1014359	-	195	3.568	49	-1	C54G6.1 | C54G6.1a | C54G6.1b | CE17604 | CE27886 | WBGene00016930 | WP:CE17604 | WP:CE27886
UTGB	GTSSWE200113.01	outron	spp-17	C54G6.5	chrI	1014557	+	22	0	1855	1850	C54G6.5 | C54G6.5.1 | C54G6.5.2 | CE30269 | WBGene00005002 | WP:CE30269 | spp-17
UTGB	GTSSWE200114.01	outron	spp-23	Y34D9A.11	chrI	1018085	+	27	0	760	752	CE21539 | WBGene00021335 | WP:CE21539 | Y34D9A.11 | spp-23
UTGB	GTSSWE200115.01	outron	Y34D9A.1	Y34D9A.1	chrI	1030816	-	23	0.5724	905	903	CE27249 | WBGene00021327 | WP:CE27249 | Y34D9A.1 | Y34D9A.1.1 | Y34D9A.1.2
UTGB	GTSSWE200116.04	outron	spd-1	Y34D9A.4	chrI	1034334	-	55	0.703	896	895	CE37061 | WBGene00004952 | WP:CE37061 | Y34D9A.4 | Y34D9A.4.1 | Y34D9A.4.2 | spd-1
UTGB	GTSSWE200117.03	outron	Y34D9A.3	Y34D9A.3	chrI	1034455	+	26	2.581	20	14	CE41944 | WBGene00021329 | WP:CE41944 | Y34D9A.3
UTGB	GTSSWE200118.06	outron	Y34D9A.7	Y34D9A.7	chrI	1041442	+	39	0	44	34	CE34397 | WBGene00021332 | WP:CE34397 | Y34D9A.7
UTGB	GTSSWE200119.09	outron	glrx-10	Y34D9A.6	chrI	1049135	+	52	3.05	470	463	CE25238 | WBGene00021331 | WP:CE25238 | Y34D9A.6 | glrx-10
UTGB	GTSSWE200120.16	exon	Y34D9A.8	Y34D9A.8b	chrI	1053735	-	204	0.4786	87	-1	CE21525 | CE40314 | WBGene00021333 | WP:CE21525 | WP:CE40314 | Y34D9A.8 | Y34D9A.8a | Y34D9A.8b
UTGB	GTSSWE200122.02	exon	Y34D9A.2	Y34D9A.2	chrI	1062338	+	32	0	111	-1	CE30217 | WBGene00021328 | WP:CE30217 | Y34D9A.2
UTGB	GTSSWE200121.15	outron	vps-4	Y34D9A.10	chrI	1067084	-	290	0	212	182	CE39043 | WBGene00021334 | WP:CE39043 | Y34D9A.10 | Y34D9A.10.1 | Y34D9A.10.2 | phi-25 | vps-4
UTGB	GTSSWE200123.07	exon	gsa-1	R06A10.2.1	chrI	1068582	+	589	1.172	416	-1	CE21115 | R06A10.2 | R06A10.2.1 | R06A10.2.2 | WBGene00001745 | WP:CE21115 | gsa-1
UTGB	GTSSWE200124.05	exon	R06A10.1	R06A10.1	chrI	1084579	+	37	0	1391	-1	CE44734 | R06A10.1 | WBGene00019909 | WP:CE44734
UTGB	GTSSWE200125.01	outron	R06A10.5	R06A10.5	chrI	1088606	+	21	0	521	486	CE40309 | CE45326 | R06A10.5 | R06A10.5a | R06A10.5b | WBGene00044895 | WP:CE40309 | WP:CE45326
UTGB	GTSSWE200126.07	outron	R06A10.4	R06A10.4	chrI	1097266	-	26	0	1470	1467	CE12518 | R06A10.4 | WBGene00019911 | WP:CE12518
UTGB	GTSSWE200127.02	exon	ceh-45	ZK993.1	chrI	1128326	+	332	1.162	35	-1	CE23489 | WBGene00022837 | WP:CE23489 | ZK993.1 | ceh-45
UTGB	GTSSWE200128.02	outron	Y48G8AL.9	Y48G8AL.9	chrI	1141516	-	27	0	492	482	CE27276 | WBGene00021688 | WP:CE27276 | Y48G8AL.9
UTGB	GTSSWE200129.09	outron	Y48G8AL.10	Y48G8AL.10	chrI	1154762	-	31	0	376	373	CE41059 | WBGene00021689 | WP:CE41059 | Y48G8AL.10
UTGB	GTSSWE200130.01	outron	aps-3	Y48G8AL.14	chrI	1156126	-	53	10.14	103	103	CE30461 | WBGene00000165 | WP:CE30461 | Y48G8AL.14 | aps-3 | apt-8
UTGB	GTSSWE200132.06	exon	haf-6	Y48G8AL.11	chrI	1175836	-	293	1.877	80	-1	CE39850 | WBGene00001816 | WP:CE39850 | Y48G8AL.11 | haf-6
UTGB	GTSSWE200133.04	outron	smg-2	Y48G8AL.6	chrI	1176115	+	42	0	362	360	CE28367 | WBGene00004880 | WP:CE28367 | Y48G8AL.6 | Y48G8AL.6.1 | Y48G8AL.6.2 | mab-11 | smg-2
UTGB	GTSSWE200134.10	outron	Y48G8AL.5	Y48G8AL.5	chrI	1190649	+	66	6.718	2551	2511	CE30462 | WBGene00021686 | WP:CE30462 | Y48G8AL.5
UTGB	GTSSWE200135.07	outron	Y48G8AL.1	Y48G8AL.1	chrI	1210935	+	99	2.589	562	559	CE29116 | WBGene00021685 | WP:CE29116 | Y48G8AL.1 | Y48G8AL.1.1 | Y48G8AL.1.2
UTGB	GTSSWE200136.08	outron	Y48G8AL.13	Y48G8AL.13.2	chrI	1228059	-	79	2.678	1259	1245	CE22187 | WBGene00021691 | WP:CE22187 | Y48G8AL.13 | Y48G8AL.13.1 | Y48G8AL.13.2 | Y48G8AL.13.3 | Y48G8AL.13.4
UTGB	GTSSWE200137.01	outron	grh-1	Y48G8AR.1	chrI	1271046	-	30	0	2890	2889	CE34614 | WBGene00001707 | WP:CE34614 | Y48G8AR.1 | grh-1
UTGB	GTSSWE200138.01	exon	Y48G8AR.2	Y48G8AR.2	chrI	1280817	+	17	0	1288	-1	CE40285 | WBGene00021693 | WP:CE40285 | Y48G8AR.2 | Y48G8AR.2.1 | Y48G8AR.2.2
UTGB	GTSSWE200139.07	outron	dapk-1	K12C11.4	chrI	1305540	+	33	0	36	23	CE40262 | K12C11.4 | WBGene00003400 | WP:CE40262 | dapk-1 | mor-3 | tag-119
UTGB	GTSSWE200140.01	outron	K12C11.3	K12C11.3	chrI	1335346	+	64	0	50	47	CE43991 | CE44139 | K12C11.3 | K12C11.3a | K12C11.3b | WBGene00019674 | WP:CE43991 | WP:CE44139
UTGB	GTSSWE200141.01	outron	K12C11.6	K12C11.6	chrI	1336875	+	27	11.06	146	140	CE40465 | K12C11.6 | WBGene00045052 | WP:CE40465
UTGB	GTSSWE200142.01	outron	K12C11.7	K12C11.7	chrI	1338328	+	32	0	480	468	CE40466 | K12C11.7 | WBGene00045053 | WP:CE40466
UTGB	GTSSWE200143.07	outron	K12C11.2.1	K12C11.2.1	chrI	1340211	+	273	0.4288	493	475	CE18056 | K12C11.2 | K12C11.2.1 | K12C11.2.2 | SMT3 | WBGene00004888 | WP:CE18056 | smo-1
UTGB	GTSSWE200144.06	outron	K12C11.1	K12C11.1.1	chrI	1346904	-	47	0.765	2210	2210	CE26819 | K12C11.1 | K12C11.1.1 | K12C11.1.2 | WBGene00019673 | WP:CE26819
UTGB	GTSSWE200148.01	exon	Y92H12BL.2	Y92H12BL.2	chrI	1375848	+	24	0	2982	-1	CE36768 | WBGene00022364 | WP:CE36768 | Y92H12BL.2
UTGB	GTSSWE200147.03	outron	Y92H12BL.4	Y92H12BL.4	chrI	1385683	-	89	4.401	624	612	CE41342 | WBGene00022365 | WP:CE41342 | Y92H12BL.4
UTGB	GTSSWE200149.07	outron	Y92H12BM.1	Y92H12BM.1	chrI	1392947	-	54	1.217	186	161	CE41343 | WBGene00022367 | WP:CE41343 | Y92H12BM.1
UTGB	GTSSWE200150.02	outron	Y92H12BR.7	Y92H12BR.7	chrI	1394310	+	14	0	260	260	CE39076 | WBGene00022372 | WP:CE39076 | Y92H12BR.7
UTGB	GTSSWE200151.04	outron	set-29	Y92H12BR.6	chrI	1403579	+	35	0	2366	2357	CE40320 | WBGene00022371 | WP:CE40320 | Y92H12BR.6 | set-29
UTGB	GTSSWE200152.01	outron	Y92H12BR.2	Y92H12BR.2	chrI	1418523	-	26	0.6865	2728	2714	CE26782 | WBGene00022368 | WP:CE26782 | Y92H12BR.2
UTGB	GTSSWE200153.05	outron	Y92H12BR.3	Y92H12BR.3a	chrI	1416554	+	29	0	38	35	CE29936 | CE39075 | WBGene00022369 | WP:CE29936 | WP:CE39075 | Y92H12BR.3 | Y92H12BR.3a | Y92H12BR.3b
UTGB	GTSSWE200154.12	outron	Y92H12BR.4	Y92H12BR.4	chrI	1435242	-	195	0.9162	1545	1523	CE26784 | WBGene00022370 | WP:CE26784 | Y92H12BR.4
UTGB	GTSSWE200155.02	outron	Y92H12BR.8	Y92H12BR.8	chrI	1435776	+	30	0	517	517	CE26840 | WBGene00022373 | WP:CE26840 | Y92H12BR.8
UTGB	GTSSWE200156.02	outron	spe-15	F47G6.4	chrI	1445493	+	11	0	1174	1162	CE17841 | F47G6.4 | WBGene00004969 | WP:CE17841 | hum-3 | spe-15
UTGB	GTSSWE200157.01	exon	acs-16	F47G6.2	chrI	1471232	+	19	0	90	-1	CE28399 | F47G6.2 | WBGene00018579 | WP:CE28399 | acs-16
UTGB	GTSSWE200159.05	outron	Y92H12A.5	Y92H12A.5	chrI	1514506	-	47	0	95	93	CE39994 | WBGene00022361 | WP:CE39994 | Y92H12A.5
UTGB	GTSSWE200160.03	outron	Y92H12A.4	Y92H12A.4	chrI	1514628	+	23	0	135	130	CE36766 | WBGene00022360 | WP:CE36766 | Y92H12A.4
UTGB	GTSSWE200161.05	exon	Y92H12A.3	Y92H12A.3	chrI	1529522	+	28	0	409	-1	CE36765 | WBGene00022359 | WP:CE36765 | Y92H12A.3
UTGB	GTSSWE200162.02	outron	Y92H12A.2	Y92H12A.2	chrI	1540779	+	31	11.94	2855	2747	CE33003 | WBGene00022358 | WP:CE33003 | Y92H12A.2
UTGB	GTSSWE200163.15	outron	src-1	Y92H12A.1	chrI	1565635	+	31	1.66	1975	1967	CE39993 | WBGene00005077 | WP:CE39993 | Y92H12A.1 | src-1
UTGB	GTSSWE200164.03	outron	Y73E7A.3	Y73E7A.3	chrI	1585527	+	29	2.056	641	641	CE38252 | CE44094 | WBGene00022270 | WP:CE38252 | WP:CE44094 | Y73E7A.3 | Y73E7A.3a | Y73E7A.3b | Y73E7A.3b.1 | Y73E7A.3b.2
UTGB	GTSSWE200165.01	outron	cpx-1	Y73E7A.4	chrI	1597032	-	15	0	855	826	CE26415 | WBGene00022271 | WP:CE26415 | Y73E7A.4 | cpx-1
UTGB	GTSSWE200166.02	exon	Y73E7A.5	Y73E7A.5	chrI	1601578	-	20	0	80	-1	CE26414 | WBGene00022272 | WP:CE26414 | Y73E7A.5
UTGB	GTSSWE200167.01	outron	Y73E7A.2	Y73E7A.2	chrI	1601779	+	32	0	62	60	CE32277 | WBGene00022269 | WP:CE32277 | Y73E7A.2
UTGB	GTSSWE200168.02	outron	adpr-1	Y73E7A.9	chrI	1610236	+	32	0	155	153	CE38757 | WBGene00044440 | WP:CE38757 | Y73E7A.9 | adpr-1
UTGB	GTSSWE200169.03	outron	bre-4	Y73E7A.7	chrI	1628640	-	24	0	2033	2009	CE26412 | WBGene00000269 | WP:CE26412 | Y73E7A.7 | bre-4
UTGB	GTSSWE200170.02	outron	Y73E7A.1	Y73E7A.1a.1	chrI	1628769	+	27	0	254	237	CE27033 | CE39986 | WBGene00022268 | WP:CE27033 | WP:CE39986 | Y73E7A.1 | Y73E7A.1a | Y73E7A.1a.1 | Y73E7A.1a.2 | Y73E7A.1b
UTGB	GTSSWE200171.03	exon	Y73E7A.8	Y73E7A.8	chrI	1634751	+	67	18.06	64	-1	CE27538 | WBGene00022274 | WP:CE27538 | Y73E7A.8
UTGB	GTSSWE200172.09	exon	mab-20	Y71G12B.20a	chrI	1651354	-	204	1.021	97	-1	CE22926 | CE33246 | WBGene00003111 | WP:CE22926 | WP:CE33246 | Y71G12B.20 | Y71G12B.20a | Y71G12B.20b | mab-20
UTGB	GTSSWE200173.01	exon	Y71G12B.18	Y71G12B.18	chrI	1651479	+	26	0	1438	-1	CE43962 | WBGene00022156 | WP:CE43962 | Y71G12B.18
UTGB	GTSSWE200174.01	exon	Y71G12B.33	Y71G12B.33	chrI	1661024	-	26	0	14	-1	CE44018 | WBGene00044358 | WP:CE44018 | Y71G12B.33
UTGB	GTSSWE200175.01	outron	Y71G12B.17	Y71G12B.17	chrI	1667250	+	16	0	479	411	CE26250 | WBGene00022155 | WP:CE26250 | Y71G12B.17
UTGB	GTSSWE200176.01	outron	Y71G12B.23	Y71G12B.23b	chrI	1676602	-	17	0	170	166	CE43606 | CE43633 | WBGene00022158 | WP:CE43606 | WP:CE43633 | Y71G12B.23 | Y71G12B.23a | Y71G12B.23b
UTGB	GTSSWE200177.01	exon	drag-1	Y71G12B.16	chrI	1679089	+	23	1.83	2725	-1	CE44779 | WBGene00022154 | WP:CE44779 | Y71G12B.16 | drag-1
UTGB	GTSSWE200178.01	exon	Y71G12B.31	Y71G12B.31	chrI	1693237	-	75	0	1624	-1	CE38654 | WBGene00044348 | WP:CE38654 | Y71G12B.31
UTGB	GTSSWE200179.19	outron	ubc-3	Y71G12B.15.1	chrI	1698129	+	77	0.8573	223	221	CE38573 | WBGene00006702 | WP:CE38573 | Y71G12B.15 | Y71G12B.15.1 | Y71G12B.15.2 | ubc-3
UTGB	GTSSWE200180.03	outron	lsm-6	Y71G12B.14	chrI	1700872	+	86	7.32	501	498	CE22886 | WBGene00003080 | WP:CE22886 | Y71G12B.14 | lsm-6
UTGB	GTSSWE200181.02	outron	Y71G12B.13	Y71G12B.13	chrI	1701975	+	310	1.483	149	131	CE40318 | WBGene00022153 | WP:CE40318 | Y71G12B.13
UTGB	GTSSWE200182.11	outron	atg-5	Y71G12B.12a	chrI	1709563	+	28	0	25	25	CE39066 | CE43967 | WBGene00022152 | WP:CE39066 | WP:CE43967 | Y71G12B.12 | Y71G12B.12a | Y71G12B.12a.1 | Y71G12B.12a.2 | Y71G12B.12b | atg-5 | atgr-5
UTGB	GTSSWE200183.15	outron	Y71G12B.11	Y71G12B.11a	chrI	1719386	+	348	1.269	2212	2207	CE27024 | CE29914 | WBGene00022151 | WP:CE27024 | WP:CE29914 | Y71G12B.11 | Y71G12B.11a | Y71G12B.11b
UTGB	GTSSWE200185.02	outron	lin-65	Y71G12B.9a	chrI	1754835	+	44	1.503	496	495	CE39067 | CE40319 | WBGene00022149 | WP:CE39067 | WP:CE40319 | Y71G12B.9 | Y71G12B.9a | Y71G12B.9b | lin-65
UTGB	GTSSWE200187.04	outron	Y71G12B.25	Y71G12B.25	chrI	1778691	-	45	7.558	2773	2756	CE44015 | WBGene00022160 | WP:CE44015 | Y71G12B.25
UTGB	GTSSWE200188.01	exon	Y71G12B.26	Y71G12B.26	chrI	1782687	-	28	0	124	-1	CE38652 | WBGene00022161 | WP:CE38652 | Y71G12B.26
UTGB	GTSSWE200189.01	exon	Y71G12B.7	Y71G12B.7	chrI	1791395	+	30	0	1061	-1	CE36764 | WBGene00022147 | WP:CE36764 | Y71G12B.7
UTGB	GTSSWE200190.01	outron	Y71G12B.6	Y71G12B.6.1	chrI	1792959	+	15	0	302	296	CE29138 | WBGene00022146 | WP:CE29138 | Y71G12B.6 | Y71G12B.6.1 | Y71G12B.6.2
UTGB	GTSSWE200191.01	exon	pghm-1	Y71G12B.4	chrI	1808097	+	11	0	23	-1	CE26253 | WBGene00022144 | WP:CE26253 | Y71G12B.4 | pghm-1
UTGB	GTSSWE200192.01	exon	Y71G12B.2	Y71G12B.2	chrI	1816100	+	25	0	51	-1	CE44119 | WBGene00022142 | WP:CE44119 | Y71G12B.2
UTGB	GTSSWE200193.02	outron	Y71G12B.1	Y71G12B.1b	chrI	1823337	+	157	1.678	118	111	CE29916 | CE29917 | WBGene00022141 | WP:CE29916 | WP:CE29917 | Y71G12B.1 | Y71G12B.1a | Y71G12B.1b | Y71G12B.1b.1 | Y71G12B.1b.2
UTGB	GTSSWE200194.03	outron	C53H9.3	C53H9.3	chrI	1832625	-	39	3.443	202	202	C53H9.3 | CE39908 | WBGene00044746 | WP:CE39908
UTGB	GTSSWE200195.01	outron	C53H9.2	C53H9.2a	chrI	1832740	+	115	2.211	158	158	C53H9.2 | C53H9.2a | C53H9.2a.1 | C53H9.2a.2 | C53H9.2b | C53H9.2b.1 | C53H9.2b.2 | C53H9.2b.3 | C53H9.2b.4 | C53H9.2c | C53H9.2c.1 | C53H9.2c.2 | C53H9.2c.3 | C53H9.2c.4 | CE08963 | CE33575 | CE39907 | WBGene00016907 | WP:CE08963 | WP:CE33575 | WP:CE39907
UTGB	GTSSWE200196.05	outron	rpl-27	C53H9.1.1	chrI	1834845	+	18	0	45	39	C53H9.1 | C53H9.1.1 | C53H9.1.2 | CE19381 | WBGene00004441 | WP:CE19381 | rpl-27
UTGB	GTSSWE200197.01	exon	egl-30	M01D7.7a	chrI	1835718	+	1296	19.8	219	-1	CE12272 | CE30556 | M01D7.7 | M01D7.7a | M01D7.7b | WBGene00001196 | WP:CE12272 | WP:CE30556 | egl-30 | gqa-1
UTGB	GTSSWE200198.32	outron	emr-1	M01D7.6.3	chrI	1841447	+	177	7.237	1014	999	CE12270 | M01D7.6 | M01D7.6.1 | M01D7.6.2 | M01D7.6.3 | WBGene00001309 | WP:CE12270 | emr-1
UTGB	GTSSWE200199.01	exon	nlp-12	M01D7.5	chrI	1843106	+	20	10.69	302	-1	CE12268 | M01D7.5 | WBGene00003750 | WP:CE12268 | nlp-12
UTGB	GTSSWE200200.03	outron	tag-96	M01D7.4	chrI	1845165	+	27	0.5445	57	44	CE36705 | M01D7.4 | WBGene00006461 | WP:CE36705 | tag-96
UTGB	GTSSWE200201.03	exon	M01D7.9	M01D7.9	chrI	1855385	-	20	0	257	-1	CE40308 | M01D7.9 | WBGene00044897 | WP:CE40308
UTGB	GTSSWE200202.05	exon	M01D7.1	M01D7.1	chrI	1861843	-	55	0.6203	1263	-1	CE45143 | M01D7.1 | WBGene00019706 | WP:CE45143
UTGB	GTSSWE200203.01	outron	scm-1	M01D7.2	chrI	1873784	-	134	9.02	1503	1476	CE25946 | M01D7.2 | WBGene00004743 | WP:CE25946 | scm-1
UTGB	GTSSWE200204.14	exon	tub-2	Y71G12A.3	chrI	1874134	+	229	1.397	44	-1	CE30571 | WBGene00022139 | WP:CE30571 | Y71G12A.3 | tag-305 | tub-2
UTGB	GTSSWE200205.02	outron	Y71G12A.4	Y71G12A.4	chrI	1895632	-	37	0	767	722	CE30323 | WBGene00022140 | WP:CE30323 | Y71G12A.4
UTGB	GTSSWE200206.01	outron	Y71G12A.2	Y71G12A.2b	chrI	1895188	+	73	14.59	48	43	CE44923 | CE45012 | WBGene00022138 | WP:CE44923 | WP:CE45012 | Y71G12A.2 | Y71G12A.2a | Y71G12A.2b
UTGB	GTSSWE200207.02	exon	Y51F10.7	Y51F10.7	chrI	1913936	-	95	1.809	28	-1	CE30321 | WBGene00021768 | WP:CE30321 | Y51F10.7
UTGB	GTSSWE200208.01	outron	Y51F10.6	Y51F10.6	chrI	1914052	+	30	0	2994	2983	CE43642 | WBGene00021767 | WP:CE43642 | Y51F10.6
UTGB	GTSSWE200210.03	outron	Y51F10.4	Y51F10.4a	chrI	1932301	+	61	1.74	53	52	CE32269 | CE39054 | WBGene00021765 | WP:CE32269 | WP:CE39054 | Y51F10.4 | Y51F10.4a | Y51F10.4b
UTGB	GTSSWE200211.03	outron	Y51F10.10	Y51F10.10	chrI	1958529	-	249	0.6029	73	25	CE31380 | WBGene00021771 | WP:CE31380 | Y51F10.10
UTGB	GTSSWE200212.08	outron	Y51F10.11	Y51F10.11	chrI	1960415	+	57	2.266	1252	1226	CE38750 | WBGene00044438 | WP:CE38750 | Y51F10.11
UTGB	GTSSWE200213.02	outron	Y51F10.3	Y51F10.3	chrI	1965505	+	37	0	2315	2269	CE32268 | WBGene00021764 | WP:CE32268 | Y51F10.3
UTGB	GTSSWE200214.05	exon	Y51F10.2	Y51F10.2	chrI	1978019	+	1695	1.582	35	-1	CE30032 | WBGene00021763 | WP:CE30032 | Y51F10.2
UTGB	GTSSWE200215.02	exon	Y51F10.9	Y51F10.9	chrI	2003658	-	23	0	2474	-1	Y51F10.9
UTGB	GTSSWE200216.06	outron	gap-3	Y20F4.3	chrI	2011236	-	65	3.595	754	738	CE44723 | WBGene00021238 | WP:CE44723 | Y20F4.3 | gap-3
UTGB	GTSSWE200217.02	outron	Y20F4.2	Y20F4.2	chrI	2025000	+	20	0	1415	1318	CE36335 | WBGene00021237 | WP:CE36335 | Y20F4.2
UTGB	GTSSWE200218.02	outron	Y20F4.4	Y20F4.4	chrI	2045073	-	97	1.313	1290	1265	CE30313 | WBGene00021239 | WP:CE30313 | Y20F4.4
UTGB	GTSSWE200219.01	exon	Y20F4.8	Y20F4.8	chrI	2050189	-	24	0	9	-1	CE38741 | WBGene00044435 | WP:CE38741 | Y20F4.8
UTGB	GTSSWE200220.05	exon	Y20F4.5	Y20F4.5	chrI	2055074	-	30	0	1370	-1	CE29368 | WBGene00021240 | WP:CE29368 | Y20F4.5
UTGB	GTSSWE200221.10	outron	Y37E3.1	Y37E3.1	chrI	2064000	-	188	9.002	55	36	CE26836 | WBGene00021346 | WP:CE26836 | Y37E3.1
UTGB	GTSSWE200222.06	outron	rpb-10	Y37E3.3	chrI	2064124	+	73	0.7641	183	171	CE26662 | WBGene00021347 | WP:CE26662 | Y37E3.3 | rpb-10
UTGB	GTSSWE200223.08	outron	moag-4	Y37E3.4	chrI	2064911	+	220	1.595	159	67	CE26771 | WBGene00021348 | WP:CE26771 | Y37E3.4 | Y37E3.4.1 | Y37E3.4.2 | moag-4
UTGB	GTSSWE200224.05	exon	arl-13	Y37E3.5a	chrI	2065734	+	27	0	17	-1	CE39044 | CE39045 | WBGene00021349 | WP:CE39044 | WP:CE39045 | Y37E3.5 | Y37E3.5a | Y37E3.5b | arl-13
UTGB	GTSSWE200226.04	outron	Y37E3.8	Y37E3.8a.1	chrI	2070829	-	386	0.3647	222	219	CE26774 | CE26904 | WBGene00021350 | WP:CE26774 | WP:CE26904 | Y37E3.8 | Y37E3.8a | Y37E3.8a.1 | Y37E3.8a.2 | Y37E3.8b | Y37E3.8b.1 | Y37E3.8b.2 | Y37E3.8b.3
UTGB	GTSSWE200227.01	outron	phb-1	Y37E3.9	chrI	2070952	+	121	4.42	403	402	CE26775 | WBGene00004014 | WP:CE26775 | Y37E3.9 | Y37E3.9.1 | Y37E3.9.2 | phb-1
UTGB	GTSSWE200228.09	outron	Y37E3.10	Y37E3.10.1	chrI	2072663	+	20	0	28	19	CE29373 | WBGene00021351 | WP:CE29373 | Y37E3.10 | Y37E3.10.1 | Y37E3.10.2
UTGB	GTSSWE200229.01	outron	Y37E3.11	Y37E3.11a	chrI	2076115	+	97	6.181	2855	2848	CE26830 | CE41945 | WBGene00021352 | WP:CE26830 | WP:CE41945 | Y37E3.11 | Y37E3.11a | Y37E3.11b
UTGB	GTSSWE200230.03	exon	Y37E3.13	Y37E3.13	chrI	2093803	-	51	0	4	-1	CE36338 | WBGene00021353 | WP:CE36338 | Y37E3.13
UTGB	GTSSWE200231.02	outron	npp-13	Y37E3.15a	chrI	2095333	+	40	0	2016	2015	CE26832 | CE30319 | CeNup93 | WBGene00003799 | WP:CE26832 | WP:CE30319 | Y37E3.15 | Y37E3.15a | Y37E3.15b | npp-13
UTGB	GTSSWE200232.01	outron	fpn-1.1	Y37E3.16.1	chrI	2118599	-	15	2.955	78	66	CE36732 | WBGene00021354 | WP:CE36732 | Y37E3.16 | Y37E3.16.1 | Y37E3.16.2 | fpn-1.1
UTGB	GTSSWE200233.08	outron	Y37E3.17	Y37E3.17a	chrI	2126974	+	32	3.833	1618	1618	CE30219 | CE37062 | WBGene00021355 | WP:CE30219 | WP:CE37062 | Y37E3.17 | Y37E3.17a | Y37E3.17b
UTGB	GTSSWE200235.01	outron	W03F11.5	W03F11.5	chrI	2213490	+	23	0	2728	2611	CE39037 | W03F11.5 | WBGene00021008 | WP:CE39037
UTGB	GTSSWE200236.01	outron	F12B6.2	F12B6.2a	chrI	2249336	+	16	0	825	796	CE30273 | CE30512 | CE30513 | CE39012 | F12B6.2 | F12B6.2a | F12B6.2b | F12B6.2b.1 | F12B6.2b.2 | F12B6.2c | F12B6.2d | WBGene00017398 | WP:CE30273 | WP:CE30512 | WP:CE30513 | WP:CE39012
UTGB	GTSSWE200237.01	exon	abt-2	F12B6.1	chrI	2275567	-	18	0	2699	-1	CE40156 | F12B6.1 | WBGene00000020 | WP:CE40156 | abt-2
UTGB	GTSSWE200238.03	outron	Y39G10AL.1	Y39G10AL.1	chrI	2278651	+	95	1.902	1197	1185	CE26987 | WBGene00021458 | WP:CE26987 | Y39G10AL.1
UTGB	GTSSWE200239.06	outron	cdk-7	Y39G10AL.3.2	chrI	2291130	-	203	0.3768	1381	1375	CE30320 | WBGene00000408 | WP:CE30320 | Y39G10AL.3 | Y39G10AL.3.1 | Y39G10AL.3.2 | cdk-7
UTGB	GTSSWE200242.07	outron	epg-2	Y39G10AR.10	chrI	2299605	+	1166	1.656	509	482	CE26989 | WBGene00021468 | WP:CE26989 | Y39G10AR.10 | Y39G10AR.10.1 | Y39G10AR.10.2 | epg-2
UTGB	GTSSWE200241.01	outron	tpxl-1	Y39G10AR.12a	chrI	2304695	-	16	19.23	301	300	CE26990 | CE29999 | WBGene00021470 | WP:CE26990 | WP:CE29999 | Y39G10AR.12 | Y39G10AR.12a | Y39G10AR.12b | Y39G10AR.12b.1 | Y39G10AR.12b.2 | tpxl-1
UTGB	GTSSWE200243.06	outron	icp-1	Y39G10AR.13.1	chrI	2306891	-	290	0.4324	103	99	CE26991 | WBGene00002047 | WP:CE26991 | Y39G10AR.13 | Y39G10AR.13.1 | Y39G10AR.13.2 | icp-1
UTGB	GTSSWE200244.01	outron	Y39G10AR.9	Y39G10AR.9	chrI	2305121	+	90	0	2290	2284	CE28982 | CE45029 | WBGene00021467 | WP:CE28982 | WP:CE45029 | Y39G10AR.9 | Y39G10AR.9a | Y39G10AR.9b
UTGB	GTSSWE200245.01	outron	Y39G10AR.21	Y39G10AR.21.1	chrI	2308891	+	15	0	87	86	CE28981 | WBGene00021476 | WP:CE28981 | Y39G10AR.21 | Y39G10AR.21.1 | Y39G10AR.21.2
UTGB	GTSSWE200246.01	outron	Y39G10AR.20	Y39G10AR.20	chrI	2312161	+	19	0	350	336	CE28980 | WBGene00021475 | WP:CE28980 | Y39G10AR.20
UTGB	GTSSWE200247.03	outron	Y39G10AR.8	Y39G10AR.8	chrI	2313181	+	164	1.963	131	91	CE27254 | WBGene00021466 | WP:CE27254 | Y39G10AR.8 | Y39G10AR.8.1 | Y39G10AR.8.2
UTGB	GTSSWE200248.02	outron	Y39G10AR.7	Y39G10AR.7	chrI	2315772	+	52	0.7606	538	536	CE21764 | WBGene00021465 | WP:CE21764 | Y39G10AR.7
UTGB	GTSSWE200249.04	outron	mcm-4	Y39G10AR.14.1	chrI	2321909	-	110	0.7118	97	90	CE21767 | WBGene00003156 | WP:CE21767 | Y39G10AR.14 | Y39G10AR.14.1 | Y39G10AR.14.2 | mcm-4
UTGB	GTSSWE200250.01	exon	srbc-64	Y39G10AR.22	chrI	2325272	+	23	0	2718	-1	CE30000 | WBGene00021477 | WP:CE30000 | Y39G10AR.22 | srbc-64
UTGB	GTSSWE200251.01	exon	Y39G10AR.16	Y39G10AR.16	chrI	2332655	-	23	0	53	-1	CE21755 | WBGene00021472 | WP:CE21755 | Y39G10AR.16
UTGB	GTSSWE200252.03	exon	ugt-31	Y39G10AR.6	chrI	2333311	+	51	0.5709	32	-1	CE33221 | WBGene00021464 | WP:CE33221 | Y39G10AR.6 | ugt-31
UTGB	GTSSWE200253.05	exon	zeel-1	Y39G10AR.5	chrI	2342292	+	240	18.42	92	-1	CE36737 | WBGene00021463 | WP:CE36737 | Y39G10AR.5 | zeel-1
UTGB	GTSSWE200254.01	exon	nekl-1	Y39G10AR.3	chrI	2357866	+	28	1.201	18	-1	CE37063 | WBGene00021461 | WP:CE37063 | Y39G10AR.3 | nekl-1
UTGB	GTSSWE200255.03	outron	sydn-1	Y39G10AR.17	chrI	2383397	-	40	0	1544	1542	CE41851 | WBGene00021473 | WP:CE41851 | Y39G10AR.17 | sydn-1
UTGB	GTSSWE200256.01	outron	Y39G10AR.18	Y39G10AR.18a	chrI	2401590	-	39	1.886	100	99	CE36735 | CE38003 | WBGene00021474 | WP:CE36735 | WP:CE38003 | Y39G10AR.18 | Y39G10AR.18a | Y39G10AR.18a.1 | Y39G10AR.18a.2 | Y39G10AR.18b
UTGB	GTSSWE200257.01	outron	zwl-1	Y39G10AR.2	chrI	2401264	+	409	0	972	969	CE26992 | WBGene00021460 | WP:CE26992 | Y39G10AR.2 | zwl-1
UTGB	GTSSWE200258.11	outron	F23C8.5	F23C8.5.1	chrI	2420470	-	26	0	122	115	CE29774 | F23C8.5 | F23C8.5.1 | F23C8.5.2 | WBGene00017734 | WP:CE29774
UTGB	GTSSWE200259.01	outron	F23C8.6	F23C8.6	chrI	2421825	-	183	5.166	126	90	CE20715 | F23C8.6 | WBGene00017735 | WP:CE20715 | phi-24
UTGB	GTSSWE200260.01	exon	F23C8.8	F23C8.8	chrI	2432678	-	18	0	95	-1	CE20717 | F23C8.8 | WBGene00017737 | WP:CE20717
UTGB	GTSSWE200261.02	outron	F23C8.9	F23C8.9	chrI	2436349	-	28	0	2738	2734	CE20718 | F23C8.9 | WBGene00017738 | WP:CE20718
UTGB	GTSSWE200262.02	outron	ubxn-1	F23C8.4	chrI	2433789	+	82	0	223	216	CE20713 | F23C8.4 | WBGene00017733 | WP:CE20713 | ubxn-1
UTGB	GTSSWE200264.05	exon	F23C8.1	F23C8.1	chrI	2445518	+	29	0	1798	-1	CE34298 | F23C8.1 | WBGene00017731 | WP:CE34298
UTGB	GTSSWE200265.02	outron	inx-19	T16H5.1b.1	chrI	2457565	-	24	0	1119	1100	CE30834 | CE33183 | T16H5.1 | T16H5.1a | T16H5.1b | T16H5.1b.1 | T16H5.1b.2 | WBGene00002141 | WP:CE30834 | WP:CE33183 | inx-19 | nsy-5 | opu-19
UTGB	GTSSWE200266.12	outron	Y74C10AL.2	Y74C10AL.2.1	chrI	2472319	-	59	1.634	390	382	CE21753 | WBGene00022280 | WP:CE21753 | Y74C10AL.2 | Y74C10AL.2.1 | Y74C10AL.2.2
UTGB	GTSSWE200267.01	outron	abtm-1	Y74C10AR.3	chrI	2488287	-	141	0	2903	2894	CE37072 | WBGene00022281 | WP:CE37072 | Y74C10AR.3 | abtm-1
UTGB	GTSSWE200268.04	outron	eif-3.I	Y74C10AR.1	chrI	2485712	+	81	1.266	158	156	CE30325 | WBGene00001232 | WP:CE30325 | Y74C10AR.1 | eif-3.I
UTGB	GTSSWE200269.03	outron	Y23H5B.6	Y23H5B.6	chrI	2489643	+	15	0	342	334	CE25231 | WBGene00021277 | WP:CE25231 | Y23H5B.6
UTGB	GTSSWE200270.09	exon	Y23H5B.7	Y23H5B.7a	chrI	2513840	-	126	2.059	128	-1	CE27597 | CE30317 | CE33208 | WBGene00021278 | WP:CE27597 | WP:CE30317 | WP:CE33208 | Y23H5B.7 | Y23H5B.7a | Y23H5B.7b | Y23H5B.7c | Y23H5B.7c.1 | Y23H5B.7c.2
UTGB	GTSSWE200271.01	outron	Y23H5B.4	Y23H5B.4	chrI	2531187	+	23	0	2105	2082	CE31098 | WBGene00021275 | WP:CE31098 | Y23H5B.4
UTGB	GTSSWE200272.01	exon	Y23H5B.3	Y23H5B.3	chrI	2544754	+	25	0	20	-1	CE23007 | WBGene00021274 | WP:CE23007 | Y23H5B.3
UTGB	GTSSWE200273.03	exon	Y23H5B.8	Y23H5B.8	chrI	2548381	-	734	3.618	52	-1	CE23004 | WBGene00021279 | WP:CE23004 | Y23H5B.8
UTGB	GTSSWE200274.05	exon	Y23H5B.2	Y23H5B.2	chrI	2549226	+	27	0	71	-1	CE23008 | WBGene00021273 | WP:CE23008 | Y23H5B.2
UTGB	GTSSWE200275.01	exon	nspd-8	Y23H5B.9	chrI	2552640	-	10	0	1048	-1	CE23003 | WBGene00021280 | WP:CE23003 | Y23H5B.9 | nspd-8
UTGB	GTSSWE200277.02	exon	scrt-1	C55C2.1	chrI	2566730	+	23	0	2031	-1	C55C2.1 | CE16948 | WBGene00016948 | WP:CE16948 | scrt-1
UTGB	GTSSWE200278.03	outron	aat-5	C55C2.5c	chrI	2576298	-	20	0	290	276	C55C2.5 | C55C2.5a | C55C2.5b | C55C2.5c | C55C2.5c.1 | C55C2.5c.2 | CE37758 | CE37759 | CE37760 | WBGene00000006 | WP:CE37758 | WP:CE37759 | WP:CE37760 | aat-5
UTGB	GTSSWE200279.03	outron	fbp-1	K07A3.1.1	chrI	2587603	-	31	2.276	1479	1477	CE21023 | K07A3.1 | K07A3.1.1 | K07A3.1.2 | K07A3.1.3 | WBGene00001404 | WP:CE21023 | fbp | fbp-1
UTGB	GTSSWE200280.02	outron	ctn-1	Y23H5A.5d.2	chrI	2603890	+	38	0	2945	2865	CE24191 | CE30315 | CE30316 | CE44370 | WBGene00000832 | WP:CE24191 | WP:CE30315 | WP:CE30316 | WP:CE44370 | Y23H5A.5 | Y23H5A.5a | Y23H5A.5b | Y23H5A.5c | Y23H5A.5d | Y23H5A.5d.1 | Y23H5A.5d.2 | Y23H5A.5d.3 | ctn-1
UTGB	GTSSWE200281.01	exon	Y23H5A.4	Y23H5A.4	chrI	2616432	+	10	0	1129	-1	CE18360 | WBGene00021271 | WP:CE18360 | Y23H5A.4
UTGB	GTSSWE200282.01	outron	Y23H5A.3	Y23H5A.3	chrI	2620554	+	28	0	106	103	CE18359 | WBGene00021270 | WP:CE18359 | Y23H5A.3
UTGB	GTSSWE200283.01	exon	cars-1	Y23H5A.7b	chrI	2629425	-	18	0	846	-1	CE18363 | CE28261 | WBGene00000800 | WP:CE18363 | WP:CE28261 | Y23H5A.7 | Y23H5A.7a | Y23H5A.7b | cars-1 | crs-1
UTGB	GTSSWE200285.04	exon	Y23H5A.8	Y23H5A.8	chrI	2631548	+	18	0	2163	-1	CE42396 | WBGene00023172 | WP:CE42396 | Y23H5A.8 | Y23H5A.8:wp144
UTGB	GTSSWE200286.01	exon	F40E3.3	F40E3.3	chrI	2636081	+	11	0	2569	-1	CE10162 | F40E3.3 | WBGene00018231 | WP:CE10162
UTGB	GTSSWE200287.02	outron	F40E3.2	F40E3.2	chrI	2642508	+	20	2.548	233	217	CE34307 | F40E3.2 | WBGene00018230 | WP:CE34307
UTGB	GTSSWE200288.01	outron	F32B5.6	F32B5.6a	chrI	2665299	+	18	0	2870	2869	CE33387 | CE36148 | CE36149 | CE36150 | F32B5.6 | F32B5.6a | F32B5.6a.1 | F32B5.6a.2 | F32B5.6b | F32B5.6c | F32B5.6d | F32B5.6d.1 | F32B5.6d.2 | F32B5.6d.3 | F32B5.6d.4 | F32B5.6d.5 | WBGene00017979 | WP:CE33387 | WP:CE36148 | WP:CE36149 | WP:CE36150
UTGB	GTSSWE200290.05	exon	cpz-1	F32B5.8	chrI	2689444	-	418	0.4162	27	-1	CE36646 | F32B5.8 | WBGene00000788 | WP:CE36646 | cpz-1
UTGB	GTSSWE200291.02	exon	F32B5.4	F32B5.4	chrI	2689521	+	21	0	2589	-1	CE09852 | F32B5.4 | WBGene00017978 | WP:CE09852
UTGB	GTSSWE200292.04	outron	F32B5.2	F32B5.2	chrI	2697280	+	59	5.868	161	122	CE36147 | F32B5.2 | WBGene00017976 | WP:CE36147
UTGB	GTSSWE200293.16	outron	lin-17	Y71F9B.5b.1	chrI	2707334	+	376	1.686	296	266	CE25569 | CE28810 | WBGene00003006 | WP:CE25569 | WP:CE28810 | Y71F9B.5 | Y71F9B.5a | Y71F9B.5b | Y71F9B.5b.1 | Y71F9B.5b.2 | Y71F9B.5b.3 | lin-17
UTGB	GTSSWE200294.05	outron	dnj-30	Y71F9B.16	chrI	2722043	-	46	0	572	566	CE29000 | WBGene00001048 | WP:CE29000 | Y71F9B.16 | dnj-30
UTGB	GTSSWE200295.04	exon	Y71F9B.6	Y71F9B.6	chrI	2726705	-	65	0	52	-1	CE40171 | WBGene00022128 | WP:CE40171 | Y71F9B.6
UTGB	GTSSWE200296.02	outron	snr-7	Y71F9B.4	chrI	2726792	+	103	11.77	227	223	1D295 | CE22871 | WBGene00004920 | WP:CE22871 | Y71F9B.4 | Y71F9B.4.1 | Y71F9B.4.2 | snr-7
UTGB	GTSSWE200297.24	outron	yop-1	Y71F9B.3.1	chrI	2728931	+	83	1.824	1080	1074	CE24624 | WBGene00022127 | WP:CE24624 | Y71F9B.3 | Y71F9B.3.1 | Y71F9B.3.2 | yop-1
UTGB	GTSSWE200298.04	outron	Y71F9B.2	Y71F9B.2	chrI	2731265	+	284	1.79	300	298	CE28809 | WBGene00022126 | WP:CE28809 | Y71F9B.2
UTGB	GTSSWE200299.28	outron	Y71F9B.8	Y71F9B.8	chrI	2742980	-	471	13.65	482	470	1D304 | CE25571 | WBGene00022129 | WP:CE25571 | Y71F9B.8
UTGB	GTSSWE200300.01	outron	plk-2	Y71F9B.7.1	chrI	2759048	-	11	0	842	842	CE22877 | WBGene00004043 | WP:CE22877 | Y71F9B.7 | Y71F9B.7.1 | Y71F9B.7.2 | plk-2
UTGB	GTSSWE200301.04	exon	Y71F9B.9b.1	Y71F9B.9b.1	chrI	2761016	-	187	0.4782	617	-1	CE28811 | CE43611 | WBGene00022130 | WP:CE28811 | WP:CE43611 | Y71F9B.9 | Y71F9B.9a | Y71F9B.9b | Y71F9B.9b.1 | Y71F9B.9b.2
UTGB	GTSSWE200303.01	outron	Y71F9B.1	Y71F9B.1	chrI	2773954	+	30	0	960	959	CE24627 | WBGene00022125 | WP:CE24627 | Y71F9B.1
UTGB	GTSSWE200302.01	outron	sop-3	Y71F9B.10a.1	chrI	2776192	-	10	0	108	93	CE28808 | CE29912 | WBGene00004946 | WP:CE28808 | WP:CE29912 | Y71F9B.10 | Y71F9B.10a | Y71F9B.10a.1 | Y71F9B.10a.2 | Y71F9B.10b | mdt-1.1 | sop-3
UTGB	GTSSWE200304.01	outron	Y71F9B.13	Y71F9B.13c	chrI	2780105	-	16	0	2897	2654	CE25566 | CE25567 | CE33244 | WBGene00022131 | WP:CE25566 | WP:CE25567 | WP:CE33244 | Y71F9B.13 | Y71F9B.13a | Y71F9B.13b | Y71F9B.13c
UTGB	GTSSWE200305.01	exon	W03D8.2	W03D8.2	chrI	2800783	-	31	0	1353	-1	CE18322 | CE40313 | W03D8.2 | W03D8.2a | W03D8.2b | WBGene00020985 | WP:CE18322 | WP:CE40313
UTGB	GTSSWE200306.01	outron	itx-1	W03D8.6	chrI	2800966	+	104	2.013	1857	1844	CE40143 | W03D8.6 | WBGene00002174 | WP:CE40143 | itx-1
UTGB	GTSSWE200307.01	exon	W03D8.11	W03D8.11	chrI	2818767	+	84	1.553	27	-1	CE40141 | W03D8.11 | WBGene00044796 | WP:CE40141
UTGB	GTSSWE200308.10	outron	W03D8.3	W03D8.3	chrI	2822636	-	95	3.589	549	517	CE26953 | W03D8.3 | WBGene00020986 | WP:CE26953
UTGB	GTSSWE200309.12	outron	pop-1	W10C8.2	chrI	2831520	-	212	0	1228	1207	CE26031 | W10C8.2 | WBGene00004077 | WP:CE26031 | pop-1 | sys-2
UTGB	GTSSWE200310.07	exon	W10C8.3	W10C8.3	chrI	2835392	-	218	0.4527	2137	-1	CE32744 | W10C8.3 | WBGene00021126 | WP:CE32744
UTGB	GTSSWE200311.01	outron	ccb-2	W10C8.1	chrI	2846423	+	17	0	298	293	CE25155 | W10C8.1 | WBGene00021125 | WP:CE25155 | ccb-2
UTGB	GTSSWE200312.01	exon	W10C8.4	W10C8.4a	chrI	2853859	-	184	3.722	61	-1	CE30703 | CE33586 | W10C8.4 | W10C8.4a | W10C8.4b | WBGene00021127 | WP:CE30703 | WP:CE33586
UTGB	GTSSWE200314.02	exon	Y71F9AL.11	Y71F9AL.11	chrI	2861283	+	140	1.204	1121	-1	CE22875 | WBGene00022116 | WP:CE22875 | Y71F9AL.11
UTGB	GTSSWE200315.03	outron	Y71F9AL.10	Y71F9AL.10	chrI	2864794	+	18	0	1747	1715	CE31386 | WBGene00022115 | WP:CE31386 | Y71F9AL.10 | Y71F9AL.10.1 | Y71F9AL.10.2
UTGB	GTSSWE200316.01	outron	Y71F9AL.12	Y71F9AL.12	chrI	2875370	-	34	6.317	79	79	CE40170 | WBGene00022117 | WP:CE40170 | Y71F9AL.12
UTGB	GTSSWE200317.05	outron	rpl-1	Y71F9AL.13a.1	chrI	2876467	-	3540	12.09	163	157	CE25552 | CE28379 | WBGene00004412 | WP:CE25552 | WP:CE28379 | Y71F9AL.13 | Y71F9AL.13a | Y71F9AL.13a.1 | Y71F9AL.13a.2 | Y71F9AL.13b | Y71F9AL.13b.1 | Y71F9AL.13b.2 | Y71F9AL.13b.3 | Y71F9AL.13b.4 | Y71F9AL.13b.5 | Y71F9AL.13b.6 | Y71F9AL.13b.7 | Y71F9AL.13b.8 | Y71F9AL.13b.9 | Y71F9AL.13c | Y71F9AL.13d | rpl-1 | rpl-10a
UTGB	GTSSWE200318.03	outron	Y71F9AL.9	Y71F9AL.9.1	chrI	2876601	+	105	4.325	336	332	CE22858 | WBGene00022114 | WP:CE22858 | Y71F9AL.9 | Y71F9AL.9.1 | Y71F9AL.9.2
UTGB	GTSSWE200319.12	outron	Y71F9AL.8	Y71F9AL.8	chrI	2878155	+	289	7.082	424	424	CE25560 | WBGene00022113 | WP:CE25560 | Y71F9AL.8
UTGB	GTSSWE200320.12	outron	dnc-5	Y71F9AL.14.2	chrI	2883743	-	116	7.612	301	301	CE27022 | WBGene00022118 | WP:CE27022 | Y71F9AL.14 | Y71F9AL.14.1 | Y71F9AL.14.2 | dnc-5
UTGB	GTSSWE200323.02	exon	Y71F9AL.6	Y71F9AL.6	chrI	2889715	+	26	0	732	-1	CE22840 | WBGene00022111 | WP:CE22840 | Y71F9AL.6
UTGB	GTSSWE200321.15	outron	arx-1	Y71F9AL.16	chrI	2894938	-	104	8.42	1223	1218	CE25554 | WBGene00000199 | WP:CE25554 | Y71F9AL.16 | arx-1
UTGB	GTSSWE200324.03	outron	Y71F9AL.17	Y71F9AL.17	chrI	2901009	-	31	0	206	147	CE29136 | WBGene00022119 | WP:CE29136 | Y71F9AL.17
UTGB	GTSSWE200325.05	outron	gst-43	Y71F9AL.5	chrI	2901313	+	23	0	29	15	CE25559 | WBGene00001791 | WP:CE25559 | Y71F9AL.5 | gst-43
UTGB	GTSSWE200327.01	exon	Y71F9AL.2	Y71F9AL.2	chrI	2914050	+	27	0	1127	-1	CE25557 | WBGene00022108 | WP:CE25557 | Y71F9AL.2
UTGB	GTSSWE200326.03	outron	pme-1	Y71F9AL.18.1	chrI	2925537	-	24	1.201	841	822	CE25556 | WBGene00004049 | WP:CE25556 | Y71F9AL.18 | Y71F9AL.18.1 | Y71F9AL.18.2 | pme-1
UTGB	GTSSWE200328.05	outron	Y71F9AL.1	Y71F9AL.1	chrI	2925229	+	334	5.217	17	12	CE29909 | WBGene00022107 | WP:CE29909 | Y71F9AL.1
UTGB	GTSSWE200329.09	outron	trap-1	Y71F9AM.6.1	chrI	2928281	+	472	1.805	117	115	CE26244 | WBGene00022122 | WP:CE26244 | Y71F9AM.6 | Y71F9AM.6.1 | Y71F9AM.6.2 | trap-1
UTGB	GTSSWE200330.05	outron	nxt-1	Y71F9AM.5b	chrI	2929792	+	760	10.89	49	42	CE26780 | CE41072 | NXT1 | WBGene00003836 | WP:CE26780 | WP:CE41072 | Y71F9AM.5 | Y71F9AM.5a | Y71F9AM.5b | nxt-1
UTGB	GTSSWE200331.02	outron	cogc-3	Y71F9AM.4a	chrI	2931307	+	29	8.719	155	155	CE33242 | CE37070 | WBGene00022121 | WP:CE33242 | WP:CE37070 | Y71F9AM.4 | Y71F9AM.4a | Y71F9AM.4a.1 | Y71F9AM.4a.2 | Y71F9AM.4b | Y71F9AM.4b.1 | Y71F9AM.4b.2 | cogc-3 | mig-29
UTGB	GTSSWE200332.02	exon	Y71F9AM.8	Y71F9AM.8	chrI	2941593	-	292	0.7539	12	-1	CE41073 | WBGene00045398 | WP:CE41073 | Y71F9AM.8
UTGB	GTSSWE200333.14	outron	bam-2	Y71F9AR.1	chrI	2958125	-	48	1.802	256	213	CE33243 | WBGene00000237 | WP:CE33243 | Y71F9AR.1 | bam-2
UTGB	GTSSWE200334.01	outron	Y71F9AR.4	Y71F9AR.4	chrI	2983140	-	11	0	66	62	CE40317 | WBGene00044894 | WP:CE40317 | Y71F9AR.4
UTGB	GTSSWE200335.02	exon	Y71F9AR.2	Y71F9AR.2	chrI	2985195	-	51	2.396	26	-1	CE40316 | WBGene00022123 | WP:CE40316 | Y71F9AR.2
UTGB	GTSSWE200336.06	outron	Y71F9AR.3	Y71F9AR.3	chrI	2995943	-	24	3.612	28	27	CE26245 | WBGene00022124 | WP:CE26245 | Y71F9AR.3
UTGB	GTSSWE200337.02	outron	dnj-28	Y54E10BL.4	chrI	2996441	+	105	17.11	70	28	CE25436 | WBGene00001046 | WP:CE25436 | Y54E10BL.4 | dnj-28
UTGB	GTSSWE200338.13	outron	nduf-5	Y54E10BL.5	chrI	3003904	-	44	0	1065	1055	CE22460 | WBGene00021839 | WP:CE22460 | Y54E10BL.5 | nduf-5
UTGB	GTSSWE200340.03	outron	col-48	Y54E10BL.2	chrI	3010583	+	17	0	108	108	CE25434 | WBGene00000625 | WP:CE25434 | Y54E10BL.2 | col-48
UTGB	GTSSWE200339.03	outron	mek-2	Y54E10BL.6	chrI	3015444	-	73	0	1997	1994	CE25437 | WBGene00003186 | WP:CE25437 | Y54E10BL.6 | glv-1 | let-537 | mek-2
UTGB	GTSSWE200341.01	outron	Y54E10BR.4	Y54E10BR.4	chrI	3015536	+	47	5.205	210	207	CE27481 | WBGene00021843 | WP:CE27481 | Y54E10BR.4
UTGB	GTSSWE200342.01	outron	Y54E10BR.3	Y54E10BR.3	chrI	3021527	+	14	0	138	125	CE22470 | WBGene00021842 | WP:CE22470 | Y54E10BR.3
UTGB	GTSSWE200343.02	outron	Y54E10BR.5	Y54E10BR.5	chrI	3031134	-	24	0	40	40	CE22466 | WBGene00021844 | WP:CE22466 | Y54E10BR.5 | Y54E10BR.5.1 | Y54E10BR.5.2
UTGB	GTSSWE200344.01	exon	rpb-7	Y54E10BR.6	chrI	3033897	-	23	0	957	-1	CE22465 | WBGene00021845 | WP:CE22465 | Y54E10BR.6 | rpb-7
UTGB	GTSSWE200345.07	exon	Y54E10BR.2	Y54E10BR.2.1	chrI	3032988	+	213	6.496	19	-1	CE22471 | WBGene00021841 | WP:CE22471 | Y54E10BR.2 | Y54E10BR.2.1 | Y54E10BR.2.2 | Y54E10BR.2.3
UTGB	GTSSWE200346.01	outron	mod-5	Y54E10BR.7	chrI	3049484	-	21	0	1688	1641	CE28995 | WBGene00003387 | WP:CE28995 | Y54E10BR.7 | mod-5
UTGB	GTSSWE200347.01	exon	ztf-23	Y54E10BR.8	chrI	3059147	-	397	12.91	74	-1	CE27284 | WBGene00021846 | WP:CE27284 | Y54E10BR.8 | ztf-23
UTGB	GTSSWE200348.03	exon	Y54E10BR.1	Y54E10BR.1	chrI	3059236	+	399	4.896	79	-1	CE34410 | CE36244 | WBGene00021840 | WP:CE34410 | WP:CE36244 | Y54E10BR.1 | Y54E10BR.1a | Y54E10BR.1b
UTGB	GTSSWE200349.11	outron	arx-7	M01B12.3	chrI	3071283	-	71	19.91	1141	1135	CE18061 | M01B12.3 | WBGene00000205 | WP:CE18061 | arx-7
UTGB	GTSSWE200350.13	outron	M01B12.4	M01B12.4a.1	chrI	3085400	-	387	9.682	561	524	CE29982 | CE30554 | CE37031 | M01B12.4 | M01B12.4a | M01B12.4a.1 | M01B12.4a.2 | M01B12.4b | M01B12.4c | WBGene00019697 | WP:CE29982 | WP:CE30554 | WP:CE37031
UTGB	GTSSWE200351.13	outron	riok-1	M01B12.5a	chrI	3096276	-	176	6.827	68	56	CE30555 | CE34349 | M01B12.5 | M01B12.5a | M01B12.5b | M01B12.5b.1 | M01B12.5b.2 | WBGene00019698 | WP:CE30555 | WP:CE34349 | riok-1
UTGB	GTSSWE200352.06	outron	nhr-64	C45E1.1b	chrI	3102309	+	254	2.06	2060	2055	C45E1.1 | C45E1.1a | C45E1.1b | CE39696 | CE39697 | WBGene00003654 | WP:CE39696 | WP:CE39697 | nhr-64
UTGB	GTSSWE200353.01	outron	C45E1.4	C45E1.4	chrI	3118859	-	19	0	1232	1231	C45E1.4 | CE44741 | WBGene00016663 | WP:CE44741
UTGB	GTSSWE200354.01	exon	K09H9.8	K09H9.8	chrI	3140602	-	12	0	33	-1	CE40977 | K09H9.8 | WBGene00045387 | WP:CE40977
UTGB	GTSSWE200355.01	exon	K09H9.5	K09H9.5	chrI	3144423	-	10	0	1253	-1	CE33146 | K09H9.5 | WBGene00019597 | WP:CE33146
UTGB	GTSSWE200356.09	outron	lpd-6	K09H9.6	chrI	3147845	-	86	11.52	59	50	CE37030 | K09H9.6 | K09H9.6.1 | K09H9.6.2 | WBGene00003062 | WP:CE37030 | lpd-6
UTGB	GTSSWE200357.02	outron	K09H9.2	K09H9.2.1	chrI	3147976	+	43	17.02	42	39	CE34336 | K09H9.2 | K09H9.2.1 | K09H9.2.2 | WBGene00019595 | WP:CE34336
UTGB	GTSSWE200358.01	exon	K09H9.1	K09H9.1	chrI	3152555	+	642	1.3	281	-1	CE36701 | K09H9.1 | WBGene00019594 | WP:CE36701
UTGB	GTSSWE200360.05	outron	Y54E10A.7	Y54E10A.7	chrI	3162717	+	31	0	100	97	CE38572 | WBGene00021829 | WP:CE38572 | Y54E10A.7 | Y54E10A.7.1 | Y54E10A.7.2
UTGB	GTSSWE200361.01	outron	dnc-6	Y54E10A.5.1	chrI	3167437	+	37	0	776	774	CE34408 | WBGene00021827 | WP:CE34408 | Y54E10A.5 | Y54E10A.5.1 | Y54E10A.5.2 | dnc-6
UTGB	GTSSWE200362.01	outron	Y54E10A.10	Y54E10A.10.1	chrI	3176418	-	25	0	106	105	CE24439 | WBGene00021830 | WP:CE24439 | Y54E10A.10 | Y54E10A.10.1 | Y54E10A.10.2
UTGB	GTSSWE200363.02	outron	Y54E10A.11	Y54E10A.11	chrI	3192769	-	37	0	71	27	CE37436 | WBGene00021831 | WP:CE37436 | Y54E10A.11
UTGB	GTSSWE200364.02	outron	Y54E10A.12	Y54E10A.12	chrI	3198913	-	10	0	80	73	CE24441 | WBGene00021832 | WP:CE24441 | Y54E10A.12
UTGB	GTSSWE200365.01	outron	Y54E10A.17	Y54E10A.17.1	chrI	3205259	+	32	0	1546	1543	CE30044 | WBGene00021835 | WP:CE30044 | Y54E10A.17 | Y54E10A.17.1 | Y54E10A.17.2
UTGB	GTSSWE200366.01	outron	fog-1	Y54E10A.4b	chrI	3210536	+	10	0	523	511	CE27479 | CE27480 | WBGene00001481 | WP:CE27479 | WP:CE27480 | Y54E10A.4 | Y54E10A.4a | Y54E10A.4a.1 | Y54E10A.4a.2 | Y54E10A.4b | cpb-4 | fog-1
UTGB	GTSSWE200367.02	outron	rom-5	Y54E10A.14	chrI	3223412	-	49	11.03	460	457	CE39860 | WBGene00004404 | WP:CE39860 | Y54E10A.14 | rom-5
UTGB	GTSSWE200368.01	exon	cdt-1	Y54E10A.15	chrI	3228027	-	5482	14.3	58	-1	CE22447 | WBGene00000413 | WP:CE22447 | Y54E10A.15 | cdt-1
UTGB	GTSSWE200369.05	outron	Y54E10A.3	Y54E10A.3	chrI	3228155	+	216	0.4486	1294	1277	CE24447 | WBGene00021826 | WP:CE24447 | Y54E10A.3 | txl
UTGB	GTSSWE200370.01	outron	cogc-1	Y54E10A.2	chrI	3233329	+	27	2.521	63	63	CE39656 | WBGene00003258 | WP:CE39656 | Y54E10A.2 | cogc-1 | mig-30
UTGB	GTSSWE200371.08	outron	mab-31	Y54E10A.16a	chrI	3247555	-	55	3.957	1492	1480	CE24445 | CE33235 | WBGene00021834 | WP:CE24445 | WP:CE33235 | Y54E10A.16 | Y54E10A.16a | Y54E10A.16b | Y54E10A.16b.1 | Y54E10A.16b.2 | mab-31
UTGB	GTSSWE200372.04	outron	zip-4	Y44E3B.1b.1	chrI	3266721	-	153	5.865	865	864	CE18390 | CE28364 | CE39837 | WBGene00021552 | WP:CE18390 | WP:CE28364 | WP:CE39837 | Y44E3B.1 | Y44E3B.1a | Y44E3B.1b | Y44E3B.1b.1 | Y44E3B.1b.2 | Y44E3B.1c | zip-4
UTGB	GTSSWE200373.04	outron	nol-5	W01B11.3	chrI	3266163	+	95	0	940	932	CE18307 | W01B11.3 | W01B11.3.1 | W01B11.3.2 | W01B11.3.3 | WBGene00020915 | WP:CE18307 | nol-5
UTGB	GTSSWE200374.01	outron	pqn-72	W01B11.5b	chrI	3277910	-	14	0	253	253	CE38559 | CE42027 | W01B11.5 | W01B11.5a | W01B11.5b | WBGene00004154 | WP:CE38559 | WP:CE42027 | pqn-72
UTGB	GTSSWE200375.02	outron	W01B11.6	W01B11.6a.1	chrI	3296232	-	11	0	1883	1874	CE26952 | W01B11.6 | W01B11.6a | W01B11.6a.1 | W01B11.6a.2 | W01B11.6b | WBGene00020917 | WP:CE26952
UTGB	GTSSWE200376.03	outron	ace-2	Y44E3A.2	chrI	3309693	-	25	3.714	2226	2106	CE28363 | WBGene00000036 | WP:CE28363 | Y44E3A.2 | ace-2
UTGB	GTSSWE200377.04	outron	Y44E3A.3	Y44E3A.3	chrI	3319951	-	37	0	1374	1365	CE21928 | WBGene00021548 | WP:CE21928 | Y44E3A.3
UTGB	GTSSWE200378.08	outron	Y44E3A.4	Y44E3A.4	chrI	3332783	-	133	5.449	2170	2108	CE37064 | WBGene00021549 | WP:CE37064 | Y44E3A.4
UTGB	GTSSWE200379.02	exon	Y44E3A.1	Y44E3A.1a	chrI	3336405	+	24	0	1963	-1	CE21926 | CE33225 | WBGene00021547 | WP:CE21926 | WP:CE33225 | Y44E3A.1 | Y44E3A.1a | Y44E3A.1b
UTGB	GTSSWE200380.02	outron	Y44E3A.6	Y44E3A.6a	chrI	3350008	-	28	1.89	115	106	CE31372 | CE31373 | WBGene00021551 | WP:CE31372 | WP:CE31373 | Y44E3A.6 | Y44E3A.6a | Y44E3A.6b
UTGB	GTSSWE200381.01	outron	W05F2.7	W05F2.7	chrI	3349715	+	22	0	2749	2720	CE44801 | W05F2.7 | WBGene00021039 | WP:CE44801
UTGB	GTSSWE200382.02	exon	W05F2.2	W05F2.2	chrI	3367759	-	37	0	1900	-1	CE14614 | W05F2.2 | WBGene00021034 | WP:CE14614
UTGB	GTSSWE200383.01	outron	W05F2.3	W05F2.3	chrI	3368566	-	13	0	14	14	CE14616 | W05F2.3 | WBGene00021035 | WP:CE14616
UTGB	GTSSWE200384.03	outron	W05F2.6	W05F2.6	chrI	3368792	+	60	0	69	60	CE42028 | W05F2.6 | WBGene00021038 | WP:CE42028
UTGB	GTSSWE200385.03	outron	W05F2.4	W05F2.4a	chrI	3405572	-	27	0	2759	2706	CE30702 | CE37251 | CE44027 | W05F2.4 | W05F2.4a | W05F2.4a.1 | W05F2.4a.2 | W05F2.4b | W05F2.4b.1 | W05F2.4b.2 | W05F2.4c | WBGene00021036 | WP:CE30702 | WP:CE37251 | WP:CE44027
UTGB	GTSSWE200386.01	exon	K03E5.2	K03E5.2a	chrI	3416808	+	12	0	2872	-1	CE37532 | CE37655 | CE39582 | CE43618 | K03E5.2 | K03E5.2a | K03E5.2b | K03E5.2c | K03E5.2c.1 | K03E5.2c.2 | K03E5.2d | WBGene00019361 | WP:CE37532 | WP:CE37655 | WP:CE39582 | WP:CE43618
UTGB	GTSSWE200387.01	outron	2013-09-01	Y47G6A.12	chrI	3438937	-	44	0.5613	402	392	CE22098 | WBGene00004775 | WP:CE22098 | Y47G6A.12 | sep-1 | stu-4
UTGB	GTSSWE200388.01	outron	tag-63	Y47G6A.28	chrI	3439021	+	15	0.7387	88	83	CE43948 | WBGene00006440 | WP:CE43948 | Y47G6A.28 | tag-63
UTGB	GTSSWE200389.01	exon	Y47G6A.13	Y47G6A.13	chrI	3444548	-	16	0	2358	-1	CE22097 | WBGene00021639 | WP:CE22097 | Y47G6A.13
UTGB	GTSSWE200390.04	outron	msh-6	Y47G6A.11	chrI	3448922	+	20	0	406	405	CE28985 | WBGene00003422 | WP:CE28985 | Y47G6A.11 | msh-6
UTGB	GTSSWE200391.04	outron	Y47G6A.14	Y47G6A.14	chrI	3466819	-	40	1.158	529	515	CE34401 | WBGene00021640 | WP:CE34401 | Y47G6A.14
UTGB	GTSSWE200392.02	outron	spg-7	Y47G6A.10	chrI	3466927	+	39	9.246	208	206	CE34400 | WBGene00004978 | WP:CE34400 | Y47G6A.10 | phi-23 | spg-7
UTGB	GTSSWE200393.05	exon	Y47G6A.9	Y47G6A.9	chrI	3478295	+	28	0	1035	-1	CE22108 | WBGene00021638 | WP:CE22108 | Y47G6A.9
UTGB	GTSSWE200394.07	outron	crn-1	Y47G6A.8	chrI	3481821	+	31	3.172	210	177	CE22109 | WBGene00000794 | WP:CE22109 | Y47G6A.8 | crn-1
UTGB	GTSSWE200395.03	exon	Y47G6A.17	Y47G6A.17	chrI	3499724	-	150	3.277	15	-1	CE40161 | WBGene00021643 | WP:CE40161 | Y47G6A.17
UTGB	GTSSWE200396.18	outron	Y47G6A.7	Y47G6A.7a.1	chrI	3502872	+	50	0	56	32	CE24373 | CE37067 | WBGene00021637 | WP:CE24373 | WP:CE37067 | Y47G6A.7 | Y47G6A.7a | Y47G6A.7a.1 | Y47G6A.7a.2 | Y47G6A.7a.3 | Y47G6A.7b | Y47G6A.7b.1 | Y47G6A.7b.2
UTGB	GTSSWE200397.15	outron	Y47G6A.18	Y47G6A.18.1	chrI	3514383	-	225	8.09	1721	1647	CE22101 | WBGene00021644 | WP:CE22101 | Y47G6A.18 | Y47G6A.18.1 | Y47G6A.18.2
UTGB	GTSSWE200398.09	exon	pcaf-1	Y47G6A.6	chrI	3516515	+	486	4.097	39	-1	CE24372 | WBGene00021636 | WP:CE24372 | Y47G6A.6 | pcaf-1
UTGB	GTSSWE200399.02	exon	Y47G6A.5	Y47G6A.5a	chrI	3533970	+	51	3.17	26	-1	CE33228 | CE41053 | WBGene00021635 | WP:CE33228 | WP:CE41053 | Y47G6A.5 | Y47G6A.5a | Y47G6A.5b
UTGB	GTSSWE200400.03	outron	rnp-6	Y47G6A.20b	chrI	3547191	-	31	0	294	284	CE24365 | CE24366 | CE31375 | WBGene00004389 | WP:CE24365 | WP:CE24366 | WP:CE31375 | Y47G6A.20 | Y47G6A.20a | Y47G6A.20b | Y47G6A.20c | rnp-6
UTGB	GTSSWE200401.03	exon	Y47G6A.4	Y47G6A.4	chrI	3547093	+	45	1.86	37	-1	CE24371 | WBGene00021634 | WP:CE24371 | Y47G6A.4
UTGB	GTSSWE200402.01	exon	Y47G6A.27	Y47G6A.27	chrI	3553189	+	13	0	2394	-1	CE27262 | WBGene00021651 | WP:CE27262 | Y47G6A.27
UTGB	GTSSWE200403.08	outron	Y47G6A.22	Y47G6A.22	chrI	3563132	-	27	0	285	278	CE24368 | WBGene00021647 | WP:CE24368 | Y47G6A.22 | Y47G6A.22.1 | Y47G6A.22.2
UTGB	GTSSWE200405.01	exon	Y47G6A.3	Y47G6A.3	chrI	3601663	+	26	0	359	-1	CE22076 | WBGene00021633 | WP:CE22076 | Y47G6A.3 | Y47G6A.3.1 | Y47G6A.3.2
UTGB	GTSSWE200406.01	exon	Y47G6A.31	Y47G6A.31	chrI	3603343	+	21	0	2	-1	CE38744 | WBGene00044436 | WP:CE38744 | Y47G6A.31
UTGB	GTSSWE200407.04	outron	mis-12	Y47G6A.24a	chrI	3605727	-	65	1.006	30	21	CE24370 | CE41948 | WBGene00021648 | WP:CE24370 | WP:CE41948 | Y47G6A.24 | Y47G6A.24a | Y47G6A.24b | mis-12
UTGB	GTSSWE200409.06	outron	inx-22	Y47G6A.2.1	chrI	3605854	+	912	6.235	2764	2666	CE39849 | WBGene00002144 | WP:CE39849 | Y47G6A.2 | Y47G6A.2.1 | Y47G6A.2.2 | inx-22
UTGB	GTSSWE200410.02	outron	inx-21	Y47G6A.1.1	chrI	3611749	+	15	0	195	195	CE38570 | WBGene00002143 | WP:CE38570 | Y47G6A.1 | Y47G6A.1.1 | Y47G6A.1.2 | inx-21 | opu-21
UTGB	GTSSWE200411.01	exon	Y47G6A.26	Y47G6A.26	chrI	3620481	-	10	0	842	-1	CE22084 | WBGene00021650 | WP:CE22084 | Y47G6A.26
UTGB	GTSSWE200412.09	exon	Y47G6A.32	Y47G6A.32	chrI	3620550	+	93	0.8272	34	-1	CE38745 | WBGene00044437 | WP:CE38745 | Y47G6A.32
UTGB	GTSSWE200413.01	outron	cah-6	T28F2.3	chrI	3626776	+	13	0	2697	2663	CE14355 | T28F2.3 | WBGene00000284 | WP:CE14355 | cah-6
UTGB	GTSSWE200414.03	outron	jmjc-1	T28F2.4a	chrI	3636618	-	125	1.336	140	132	CE28497 | CE37050 | T28F2.4 | T28F2.4a | T28F2.4b | WBGene00020902 | WP:CE28497 | WP:CE37050 | jmjc-1
UTGB	GTSSWE200415.01	outron	T28F2.2	T28F2.2	chrI	3636279	+	57	0	1298	1277	CE31075 | T28F2.2 | WBGene00020901 | WP:CE31075
UTGB	GTSSWE200416.01	exon	T28F2.1	T28F2.1	chrI	3639643	+	13	0	7	-1	CE45021 | T28F2.1 | WBGene00020900 | WP:CE45021
UTGB	GTSSWE200417.02	outron	ccb-1	T28F2.5	chrI	3648115	-	26	1.08	1231	1037	CE39788 | T28F2.5 | WBGene00000368 | WP:CE39788 | ccb-1
UTGB	GTSSWE200418.01	exon	col-50	T28F2.6	chrI	3653081	-	10	0	479	-1	CE14361 | T28F2.6 | WBGene00000627 | WP:CE14361 | col-50
UTGB	GTSSWE200419.02	exon	T28F2.7	T28F2.7	chrI	3662434	-	38	0	1386	-1	CE39789 | T28F2.7 | WBGene00020903 | WP:CE39789
UTGB	GTSSWE200421.24	outron	D1037.3.1	D1037.3.1	chrI	3681967	-	367	3.344	1065	1037	CE20622 | D1037.3 | D1037.3.1 | D1037.3.2 | D1037.3.3 | D1037.3.4 | WBGene00001501 | WP:CE20622 | ftn-2
UTGB	GTSSWE200422.04	outron	rab-8	D1037.4	chrI	3684115	-	142	1.134	53	26	CE30373 | D1037.4 | WBGene00004272 | WP:CE30373 | rab-8 | rab8
UTGB	GTSSWE200423.03	outron	D1037.1	D1037.1	chrI	3682071	+	87	14.79	2733	2716	CE20620 | D1037.1 | WBGene00017025 | WP:CE20620
UTGB	GTSSWE200424.01	exon	D1037.5	D1037.5	chrI	3694228	-	13	0	211	-1	CE44106 | D1037.5 | WBGene00017026 | WP:CE44106
UTGB	GTSSWE200425.01	outron	msh-2	H26D21.2	chrI	3700325	-	20	0	2787	2773	CE21000 | H26D21.2 | H26D21.2.1 | H26D21.2.2 | WBGene00003418 | WP:CE21000 | msh-2
UTGB	GTSSWE200426.01	outron	hus-1	H26D21.1	chrI	3698083	+	14	0	31	21	CE20999 | H26D21.1 | WBGene00002042 | WP:CE20999 | dam-1 | hus-1
UTGB	GTSSWE200428.05	exon	F21A9.1	F21A9.1	chrI	3711328	+	32	0	847	-1	CE40304 | F21A9.1 | WBGene00017650 | WP:CE40304
UTGB	GTSSWE200430.04	outron	glh-4	T12F5.3.1	chrI	3725068	+	21	0	1995	1961	CE29052 | T12F5.3 | T12F5.3.1 | T12F5.3.2 | WBGene00001601 | WP:CE29052 | glh-4
UTGB	GTSSWE200431.01	outron	T12F5.2	T12F5.2	chrI	3730974	+	20	0	399	380	CE13597 | T12F5.2 | WBGene00020467 | WP:CE13597
UTGB	GTSSWE200432.03	exon	larp-5	T12F5.5a	chrI	3741252	-	215	2.54	915	-1	CE34368 | CE39278 | T12F5.5 | T12F5.5a | T12F5.5b | WBGene00004147 | WP:CE34368 | WP:CE39278 | larp-2 | larp-5 | pqn-64
UTGB	GTSSWE200433.02	outron	T12F5.1	T12F5.1	chrI	3739406	+	33	0	2064	2054	CE13595 | T12F5.1 | WBGene00020466 | WP:CE13595
UTGB	GTSSWE200434.01	exon	math-46	Y8G1A.1a	chrI	3745517	+	12	0	74	-1	CE18355 | CE39117 | WBGene00021175 | WP:CE18355 | WP:CE39117 | Y8G1A.1 | Y8G1A.1a | Y8G1A.1b | math-46
UTGB	GTSSWE200437.01	exon	C32E8.6	C32E8.6a	chrI	3774708	+	26	1.101	9	-1	C32E8.6 | C32E8.6a | C32E8.6b | CE27814 | CE30371 | WBGene00016324 | WP:CE27814 | WP:CE30371
UTGB	GTSSWE200438.02	exon	ric-19	C32E8.7	chrI	3781634	-	28	0	87	-1	C32E8.7 | CE39089 | WBGene00004368 | WP:CE39089 | ric-19
UTGB	GTSSWE200439.03	outron	C32E8.5	C32E8.5.1	chrI	3781940	+	16	0	199	180	C32E8.5 | C32E8.5.1 | C32E8.5.2 | CE08529 | WBGene00016323 | WP:CE08529
UTGB	GTSSWE200440.12	outron	C32E8.3	C32E8.3	chrI	3786334	+	53	0.9204	262	256	C32E8.3 | CE08527 | WBGene00016321 | WP:CE08527
UTGB	GTSSWE200441.04	outron	rpl-13	C32E8.2a.1	chrI	3787866	+	49	6.697	178	172	C32E8.2 | C32E8.2a | C32E8.2a.1 | C32E8.2a.2 | C32E8.2b | C32E8.2b.1 | C32E8.2b.2 | CE08526 | CE33562 | WBGene00004425 | WP:CE08526 | WP:CE33562 | rpl-13
UTGB	GTSSWE200442.03	outron	ptr-2	C32E8.8	chrI	3793015	-	29	0	217	215	C32E8.8 | CE08532 | WBGene00004217 | WP:CE08532 | ptr-2
UTGB	GTSSWE200444.01	exon	C32E8.1	C32E8.1	chrI	3793203	+	14	0	2965	-1	C32E8.1 | CE08525 | WBGene00016320 | WP:CE08525
UTGB	GTSSWE200443.08	outron	C32E8.9	C32E8.9	chrI	3798815	-	85	1.216	763	745	C32E8.9 | CE29693 | WBGene00016325 | WP:CE29693
UTGB	GTSSWE200446.03	outron	C32E8.11	C32E8.11	chrI	3818910	-	2342	0.2967	2111	2098	C32E8.11 | CE40441 | WBGene00016326 | WP:CE40441
UTGB	GTSSWE200447.03	outron	npp-11	F53F10.5.1	chrI	3817956	+	136	2.242	125	120	CE10988 | F53F10.5 | F53F10.5.1 | F53F10.5.2 | WBGene00003797 | WP:CE10988 | npp-11
UTGB	GTSSWE200448.24	outron	unc-108	F53F10.4	chrI	3824476	+	134	2.611	477	473	CE10986 | F53F10.4 | F53F10.4.1 | F53F10.4.2 | WBGene00006833 | WP:CE10986 | rab-2 | unc-108 | unc-67
UTGB	GTSSWE200449.11	outron	F53F10.3	F53F10.3	chrI	3826228	+	147	6.889	1011	993	CE28447 | F53F10.3 | F53F10.3.1 | F53F10.3.2 | WBGene00018765 | WP:CE28447
UTGB	GTSSWE200450.03	exon	F53F10.8	F53F10.8	chrI	3828193	+	40	1.115	59	-1	CE38713 | F53F10.8 | F53F10.8.1 | F53F10.8.2 | WBGene00044423 | WP:CE38713
UTGB	GTSSWE200452.04	exon	F53F10.1	F53F10.1	chrI	3837786	-	663	0.366	35	-1	CE10980 | F53F10.1 | WBGene00018763 | WP:CE10980
UTGB	GTSSWE200453.02	outron	gsp-4	T03F1.5	chrI	3839812	-	16	0	378	136	CE13104 | T03F1.5 | T03F1.5.1 | T03F1.5.2 | WBGene00020187 | WP:CE13104 | gsp-4
UTGB	GTSSWE200454.05	outron	T03F1.6	T03F1.6b	chrI	3842450	-	130	2.208	917	897	CE13106 | CE28248 | T03F1.6 | T03F1.6a | T03F1.6b | WBGene00020188 | WP:CE13106 | WP:CE28248
UTGB	GTSSWE200455.01	exon	T03F1.11	T03F1.11	chrI	3853840	+	21	0	15	-1	CE37040 | T03F1.11 | WBGene00020192 | WP:CE37040
UTGB	GTSSWE200456.01	outron	T03F1.7	T03F1.7	chrI	3859680	-	47	6.135	385	385	CE30685 | T03F1.7 | WBGene00020189 | WP:CE30685
UTGB	GTSSWE200457.02	exon	T03F1.8	T03F1.8a	chrI	3862558	-	28	1.536	3	-1	CE29460 | CE41008 | T03F1.8 | T03F1.8a | T03F1.8b | WBGene00020190 | WP:CE29460 | WP:CE41008
UTGB	GTSSWE200458.14	outron	hcp-4	T03F1.9	chrI	3866010	-	68	13.42	70	69	CE13112 | T03F1.9 | WBGene00001832 | WP:CE13112 | hcp-4
UTGB	GTSSWE200459.02	outron	pgk-1	T03F1.3	chrI	3866111	+	183	8.123	1443	1439	CE13100 | T03F1.3 | T03F1.3.1 | T03F1.3.2 | WBGene00020185 | WP:CE13100 | pgk-1
UTGB	GTSSWE200460.02	exon	clec-53	T03F1.10	chrI	3875658	-	63	0	2259	-1	CE38630 | T03F1.10 | WBGene00020191 | WP:CE38630 | clec-53
UTGB	GTSSWE200461.02	outron	T03F1.1	T03F1.1.1	chrI	3874043	+	25	0	330	324	CE13096 | T03F1.1 | T03F1.1.1 | T03F1.1.2 | WBGene00020184 | WP:CE13096
UTGB	GTSSWE200462.05	outron	T03F1.12	T03F1.12	chrI	3876866	-	31	0	160	159	CE33164 | T03F1.12 | WBGene00020193 | WP:CE33164
UTGB	GTSSWE200463.02	outron	C50F2.3	C50F2.3	chrI	3875770	+	608	2.877	1298	1295	C50F2.3 | C50F2.3.1 | C50F2.3.2 | CE08909 | WBGene00016837 | WP:CE08909 | phi-4
UTGB	GTSSWE200464.01	outron	C50F2.2	C50F2.2	chrI	3880991	+	22	0	844	827	C50F2.2 | CE27877 | WBGene00016836 | WP:CE27877
UTGB	GTSSWE200465.01	exon	abf-2	C50F2.10	chrI	3885908	-	21	0.7682	17	-1	C50F2.10 | CE27876 | WBGene00000013 | WP:CE27876 | abf-2
UTGB	GTSSWE200466.04	outron	abf-1	C50F2.9	chrI	3888663	-	40	0	1580	1569	C50F2.9 | CE27879 | WBGene00000012 | WP:CE27879 | abf-1
UTGB	GTSSWE200467.10	exon	C50F2.4	C50F2.4	chrI	3891531	-	241	1.623	10	-1	C50F2.4 | C50F2.4.1 | C50F2.4.2 | CE08910 | WBGene00016838 | WP:CE08910
UTGB	GTSSWE200468.03	exon	C50F2.1	C50F2.1	chrI	3892310	+	29	0	24	-1	C50F2.1 | CE36635 | WBGene00016835 | WP:CE36635
UTGB	GTSSWE200469.01	exon	C50F2.5	C50F2.5	chrI	3898166	-	13	0	813	-1	C50F2.5 | CE08911 | WBGene00016839 | WP:CE08911
UTGB	GTSSWE200470.03	exon	fkb-5	C50F2.6b	chrI	3899815	-	75	0	10	-1	C50F2.6 | C50F2.6a | C50F2.6a.1 | C50F2.6a.2 | C50F2.6a.3 | C50F2.6b | CE08912 | CE27878 | WBGene00001430 | WP:CE08912 | WP:CE27878 | dao-8 | fkb-5
UTGB	GTSSWE200471.01	exon	C50F2.7	C50F2.7	chrI	3901537	-	33	0	203	-1	C50F2.7 | CE08913 | WBGene00016840 | WP:CE08913
UTGB	GTSSWE200472.03	outron	C50F2.8	C50F2.8	chrI	3907867	-	65	1.086	2664	2656	C50F2.8 | CE34276 | WBGene00016841 | WP:CE34276
UTGB	GTSSWE200473.05	outron	pbs-4	T20F5.2	chrI	3908648	+	96	4.389	106	101	CE13818 | T20F5.2 | T20F5.2.1 | T20F5.2.2 | WBGene00003950 | WP:CE13818 | pbs-4
UTGB	GTSSWE200474.02	outron	T20F5.3	T20F5.3	chrI	3910918	-	25	1.35	378	373	CE40717 | T20F5.3 | T20F5.3.1 | T20F5.3.2 | WBGene00020625 | WP:CE40717
UTGB	GTSSWE200475.01	exon	T20F5.8	T20F5.8	chrI	3912803	-	20	0.6444	329	-1	CE44011 | T20F5.8 | WBGene00077599 | WP:CE44011
UTGB	GTSSWE200477.04	exon	T20F5.5	T20F5.5	chrI	3920516	-	45	7.786	1340	-1	CE43999 | T20F5.5 | WBGene00020627 | WP:CE43999
UTGB	GTSSWE200479.05	outron	T20F5.7	T20F5.7	chrI	3930216	-	171	0.4269	2332	2328	CE13828 | T20F5.7 | WBGene00020629 | WP:CE13828
UTGB	GTSSWE200480.03	exon	T21E3.2	T21E3.2	chrI	3930314	+	33	3.886	518	-1	CE34373 | T21E3.2 | WBGene00020653 | WP:CE34373
UTGB	GTSSWE200481.02	exon	lrp-2	T21E3.3	chrI	3943893	-	22	0	284	-1	CE42650 | T21E3.3 | WBGene00003072 | WP:CE42650 | lrp-2 | tag-162
UTGB	GTSSWE200483.01	exon	F47B3.4	F47B3.4	chrI	3958615	+	26	0	2424	-1	CE10622 | F47B3.4 | WBGene00018528 | WP:CE10622
UTGB	GTSSWE200484.01	exon	F28H1.4	F28H1.4a	chrI	3977283	-	18	0	62	-1	CE34299 | CE37766 | F28H1.4 | F28H1.4a | F28H1.4b | F28H1.4b.1 | F28H1.4b.2 | F28H1.4b.3 | WBGene00017909 | WP:CE34299 | WP:CE37766
UTGB	GTSSWE200485.03	exon	F28H1.5	F28H1.5	chrI	3980026	-	30	0	499	-1	CE09770 | F28H1.5 | WBGene00017910 | WP:CE09770
UTGB	GTSSWE200487.10	exon	F28H1.2.1	F28H1.2.1	chrI	3987942	+	278	0.4594	38	-1	CE09767 | F28H1.2 | F28H1.2.1 | F28H1.2.2 | WBGene00000779 | WP:CE09767 | cpn-3
UTGB	GTSSWE200490.01	exon	F55C7.2	F55C7.2	chrI	4004322	+	14	0	1115	-1	CE11170 | F55C7.2 | WBGene00018868 | WP:CE11170
UTGB	GTSSWE200489.20	outron	unc-73	F55C7.7a	chrI	4032592	-	224	0.4502	963	851	CE19464 | CE19465 | CE19466 | CE19467 | CE29398 | CE36937 | CE43442 | CE43469 | CE43472 | F55C7.7 | F55C7.7a | F55C7.7b | F55C7.7c | F55C7.7d | F55C7.7d.1 | F55C7.7d.2 | F55C7.7e | F55C7.7f | F55C7.7g | F55C7.7h | F55C7.7i | WBGene00006805 | WP:CE19464 | WP:CE19465 | WP:CE19466 | WP:CE19467 | WP:CE29398 | WP:CE36937 | WP:CE43442 | WP:CE43469 | WP:CE43472 | unc-73
UTGB	GTSSWE200491.09	exon	unc-89	C09D1.1b	chrI	4035748	+	177	1.578	146	-1	C09D1.1 | C09D1.1a | C09D1.1b | C09D1.1c | C09D1.1d | C09D1.1e | C09D1.1f | C09D1.1g | CE30426 | CE34251 | CE34252 | CE37701 | CE37702 | CE37703 | CE37704 | WBGene00006820 | WP:CE30426 | WP:CE34251 | WP:CE34252 | WP:CE37701 | WP:CE37702 | WP:CE37703 | WP:CE37704 | phm-1 | unc-89
UTGB	GTSSWE200492.03	outron	H31G24.3	H31G24.3	chrI	4116158	+	27	0	694	688	CE42890 | H31G24.3 | WBGene00019254 | WP:CE42890
UTGB	GTSSWE200493.01	exon	H31G24.1	H31G24.1	chrI	4123336	+	21	0	146	-1	CE21002 | H31G24.1 | WBGene00019253 | WP:CE21002
UTGB	GTSSWE200494.03	exon	lin-44	E01A2.3b	chrI	4126156	+	41	1.767	23	-1	CE24870 | CE36923 | E01A2.3 | E01A2.3a | E01A2.3b | WBGene00003029 | WP:CE24870 | WP:CE36923 | lin-44
UTGB	GTSSWE200495.07	exon	E01A2.4	E01A2.4.1	chrI	4132246	-	227	0.3791	52	-1	CE24871 | E01A2.4 | E01A2.4.1 | E01A2.4.2 | WBGene00017086 | WP:CE24871
UTGB	GTSSWE200496.02	outron	E01A2.2	E01A2.2a	chrI	4132370	+	370	11.46	132	131	CE20643 | CE33369 | E01A2.2 | E01A2.2a | E01A2.2a.1 | E01A2.2a.2 | E01A2.2b | E01A2.2b.1 | E01A2.2b.2 | WBGene00017085 | WP:CE20643 | WP:CE33369
UTGB	GTSSWE200497.03	outron	E01A2.5	E01A2.5	chrI	4137749	-	116	6.103	679	675	CE39095 | E01A2.5 | WBGene00017087 | WP:CE39095
UTGB	GTSSWE200498.10	outron	E01A2.6	E01A2.6	chrI	4139421	-	706	10.53	474	467	CE24873 | E01A2.6 | E01A2.6.1 | E01A2.6.2 | E01A2.6.3 | WBGene00017088 | WP:CE24873
UTGB	GTSSWE200499.01	exon	E01A2.1	E01A2.1b	chrI	4139476	+	40	0	83	-1	CE24869 | CE41889 | E01A2.1 | E01A2.1a | E01A2.1b | WBGene00017084 | WP:CE24869 | WP:CE41889
UTGB	GTSSWE200500.01	exon	E01A2.10	E01A2.10	chrI	4147154	-	17	0.6929	57	-1	CE20637 | E01A2.10 | E01A2.10.1 | E01A2.10.2 | WBGene00077701 | WP:CE20637
UTGB	GTSSWE200501.01	exon	E01A2.8	E01A2.8	chrI	4148304	-	37	0.5947	47	-1	CE42513 | E01A2.8 | WBGene00017090 | WP:CE42513
UTGB	GTSSWE200502.02	exon	R12E2.15	R12E2.15	chrI	4149430	-	461	0.9271	17	-1	CE18147 | R12E2.15 | R12E2.15.1 | R12E2.15.2 | WBGene00020040 | WP:CE18147
UTGB	GTSSWE200503.01	exon	R12E2.14	R12E2.14	chrI	4149982	+	341	0.4022	19	-1	CE18146 | R12E2.14 | R12E2.14.1 | R12E2.14.2 | WBGene00020039 | WP:CE18146
UTGB	GTSSWE200504.02	exon	R12E2.7	R12E2.7	chrI	4154439	-	54	0	33	-1	CE18139 | R12E2.7 | R12E2.7.1 | R12E2.7.2 | WBGene00020033 | WP:CE18139
UTGB	GTSSWE200505.02	exon	R12E2.8	R12E2.8	chrI	4158731	-	76	0.4713	31	-1	CE34360 | R12E2.8 | WBGene00020034 | WP:CE34360
UTGB	GTSSWE200506.02	outron	inx-15	R12E2.9	chrI	4161202	-	70	1.086	90	87	CE18141 | R12E2.9 | WBGene00002137 | WP:CE18141 | inx-15 | opu-15
UTGB	GTSSWE200507.05	outron	inx-16	R12E2.5	chrI	4162025	+	131	5.788	33	22	CE28765 | R12E2.5 | WBGene00002138 | WP:CE28765 | inx-16 | opu-16
UTGB	GTSSWE200508.03	outron	inx-17	R12E2.4a	chrI	4164799	+	18	0	337	337	1E733 | CE18136 | CE38537 | R12E2.4 | R12E2.4a | R12E2.4a.1 | R12E2.4a.2 | R12E2.4b | WBGene00002139 | WP:CE18136 | WP:CE38537 | inx-17 | opu-17
UTGB	GTSSWE200509.04	exon	egg-5	R12E2.10	chrI	4172676	-	26	0	1087	-1	CE18142 | R12E2.10 | WBGene00020035 | WP:CE18142 | egg-5
UTGB	GTSSWE200510.02	outron	R12E2.11	R12E2.11	chrI	4173671	-	23	0	46	45	CE18143 | R12E2.11 | R12E2.11.1 | R12E2.11.2 | WBGene00020036 | WP:CE18143
UTGB	GTSSWE200511.04	outron	R12E2.12	R12E2.12	chrI	4175030	-	68	2.231	289	254	CE33159 | R12E2.12 | R12E2.12.1 | R12E2.12.2 | WBGene00020037 | WP:CE33159
UTGB	GTSSWE200512.01	outron	rpn-8	R12E2.3.1	chrI	4175106	+	27	0	218	214	CE18135 | R12E2.3 | R12E2.3.1 | R12E2.3.2 | WBGene00004464 | WP:CE18135 | rpn-8
UTGB	GTSSWE200513.04	outron	R12E2.13	R12E2.13.1	chrI	4178544	-	235	0.8799	107	95	CE18145 | R12E2.13 | R12E2.13.1 | R12E2.13.2 | WBGene00020038 | WP:CE18145
UTGB	GTSSWE200514.06	outron	R12E2.2	R12E2.2	chrI	4178653	+	65	0.4415	209	160	CE28764 | R12E2.2 | R12E2.2.1 | R12E2.2.2 | WBGene00020031 | WP:CE28764
UTGB	GTSSWE200515.02	outron	R12E2.1	R12E2.1	chrI	4181745	+	127	1.495	477	477	CE44841 | R12E2.1 | R12E2.1.1 | R12E2.1.2 | WBGene00020030 | WP:CE44841
UTGB	GTSSWE200516.01	exon	ppw-1	C18E3.7a	chrI	4184738	+	29	3.262	324	-1	C18E3.7 | C18E3.7a | C18E3.7b | C18E3.7c | C18E3.7c.1 | C18E3.7c.2 | C18E3.7d | C18E3.7d.1 | C18E3.7d.2 | C18E3.7d.3 | CE08316 | CE27715 | CE31307 | CE33363 | WBGene00004093 | WP:CE08316 | WP:CE27715 | WP:CE31307 | WP:CE33363 | ppw-1
UTGB	GTSSWE200517.01	outron	cas-2	C18E3.6	chrI	4189764	+	10	0	396	396	C18E3.6 | C18E3.6.1 | C18E3.6.2 | CE27714 | WBGene00015975 | WP:CE27714 | cas-2
UTGB	GTSSWE200518.04	outron	C18E3.3	C18E3.3	chrI	4203221	+	37	0	241	239	C18E3.3 | CE08312 | WBGene00015972 | WP:CE08312
UTGB	GTSSWE200519.02	outron	hop-1	C18E3.8	chrI	4211770	-	41	0	1427	1426	C18E3.8 | CE08317 | WBGene00001985 | WP:CE08317 | hop-1
UTGB	GTSSWE200520.05	outron	C18E3.2	C18E3.2.1	chrI	4210861	+	73	0.9426	138	120	C18E3.2 | C18E3.2.1 | C18E3.2.2 | C18E3.2.3 | CE30249 | WBGene00015971 | WP:CE30249
UTGB	GTSSWE200521.03	exon	C18E3.1	C18E3.1	chrI	4212534	+	35	3.991	210	-1	C18E3.1 | CE27712 | WBGene00015970 | WP:CE27712
UTGB	GTSSWE200522.03	exon	C18E3.9	C18E3.9a	chrI	4215751	-	155	4.011	81	-1	C18E3.9 | C18E3.9a | C18E3.9b | CE27716 | CE40905 | WBGene00015976 | WP:CE27716 | WP:CE40905
UTGB	GTSSWE200523.14	outron	nab-1	C43E11.6d.1	chrI	4227831	+	64	6.958	2085	2058	C43E11.6 | C43E11.6a | C43E11.6a.1 | C43E11.6a.2 | C43E11.6b | C43E11.6c | C43E11.6d | C43E11.6d.1 | C43E11.6d.2 | C43E11.6e | C43E11.6e.1 | C43E11.6e.2 | CE08684 | CE27846 | CE27847 | CE29717 | CE37753 | WBGene00003516 | WP:CE08684 | WP:CE27846 | WP:CE27847 | WP:CE29717 | WP:CE37753 | nab-1
UTGB	GTSSWE200524.07	outron	C43E11.5	C43E11.5	chrI	4235753	+	65	0.9162	1282	1247	C43E11.5 | CE08683 | WBGene00016605 | WP:CE08683
UTGB	GTSSWE200525.02	outron	ndx-7	C43E11.7.1	chrI	4242778	-	21	2.836	50	49	C43E11.7 | C43E11.7.1 | C43E11.7.2 | CE30504 | WBGene00003584 | WP:CE30504 | ndx-7
UTGB	GTSSWE200526.02	exon	exoc-7	C43E11.8	chrI	4247583	-	29	0	1	-1	C43E11.8 | CE08686 | WBGene00016606 | WP:CE08686 | exoc-7
UTGB	GTSSWE200527.01	outron	tufm-2	C43E11.4	chrI	4247647	+	485	8.949	115	110	C43E11.4 | CE32610 | EF-Tu2 | WBGene00007001 | WP:CE32610 | tufm-2
UTGB	GTSSWE200528.01	outron	cogc-5	C43E11.11	chrI	4249278	+	13	0	222	216	C43E11.11 | C43E11.11.1 | C43E11.11.2 | CE32607 | WBGene00016608 | WP:CE32607 | cogc-5
UTGB	GTSSWE200529.08	exon	met-1	C43E11.3a	chrI	4254241	+	314	1.025	236	-1	C43E11.3 | C43E11.3a | C43E11.3b | CE08681 | CE30503 | WBGene00016603 | WP:CE08681 | WP:CE30503 | met-1
UTGB	GTSSWE200530.04	outron	mus-81	C43E11.2a	chrI	4264349	+	109	1.322	761	761	C43E11.2 | C43E11.2a | C43E11.2a.1 | C43E11.2a.2 | C43E11.2b | CE08680 | CE32609 | WBGene00016602 | WP:CE08680 | WP:CE32609 | mus-81
UTGB	GTSSWE200531.05	outron	C43E11.9	C43E11.9.1	chrI	4268211	-	39	3.892	242	242	C43E11.9 | C43E11.9.1 | C43E11.9.2 | CE08687 | WBGene00016607 | WP:CE08687
UTGB	GTSSWE200532.04	outron	cdc-6	C43E11.10	chrI	4270493	-	88	1.002	204	204	C43E11.10 | CE08688 | WBGene00000382 | WP:CE08688 | cdc-6
UTGB	GTSSWE200533.01	outron	acin-1	C43E11.1	chrI	4270631	+	92	19.12	105	90	C43E11.1 | CE23592 | WBGene00016601 | WP:CE23592 | acin-1
UTGB	GTSSWE200534.05	exon	Y47D9A.3	Y47D9A.3	chrI	4273127	+	31	0	2805	-1	CE34398 | WBGene00021630 | WP:CE34398 | Y47D9A.3
UTGB	GTSSWE200537.33	exon	anc-1	ZK973.6	chrI	4320889	+	681	1.114	207	-1	CE33588 | WBGene00000140 | WP:CE33588 | ZK973.6 | anc-1
UTGB	GTSSWE200538.05	exon	ZK973.8	ZK973.8	chrI	4367910	-	373	0.7295	959	-1	CE24754 | WBGene00022834 | WP:CE24754 | ZK973.8
UTGB	GTSSWE200540.04	outron	ZK973.9	ZK973.9	chrI	4372184	-	25	0	71	44	CE23479 | WBGene00022835 | WP:CE23479 | ZK973.9
UTGB	GTSSWE200541.02	outron	lpd-5	ZK973.10.1	chrI	4374206	-	26	0	1186	1186	CE40009 | WBGene00003061 | WP:CE40009 | ZK973.10 | ZK973.10.1 | ZK973.10.2 | lpd-5 | nduf-4
UTGB	GTSSWE200542.08	outron	ZK973.2	ZK973.2.1	chrI	4373236	+	55	4.905	429	428	CE24748 | WBGene00022831 | WP:CE24748 | ZK973.2 | ZK973.2.1 | ZK973.2.2
UTGB	GTSSWE200544.01	outron	ZK973.1	ZK973.1	chrI	4381931	+	103	6.749	635	635	CE24746 | WBGene00022830 | WP:CE24746 | ZK973.1
UTGB	GTSSWE200545.01	outron	dhc-1	T21E12.4	chrI	4386608	+	30	0	183	180	CE23997 | T21E12.4 | WBGene00000962 | WP:CE23997 | dhc-1 | let-354 | spd-4
UTGB	GTSSWE200546.01	exon	T21E12.3	T21E12.3	chrI	4402081	+	23	0	1312	-1	CE13882 | T21E12.3 | WBGene00020655 | WP:CE13882
UTGB	GTSSWE200547.01	outron	T21E12.2	T21E12.2	chrI	4409132	+	18	0	2671	2625	CE28687 | T21E12.2 | T21E12.2.1 | T21E12.2.2 | WBGene00020654 | WP:CE28687
UTGB	GTSSWE200548.01	outron	cgef-2	C11D9.1	chrI	4420932	+	32	1.176	1188	1101	C11D9.1 | CE37706 | WBGene00015704 | WP:CE37706 | cgef-2
UTGB	GTSSWE200549.18	outron	C41D11.3	C41D11.3	chrI	4432747	-	38	0	829	821	C41D11.3 | C41D11.3a | C41D11.3b | CE08660 | CE40195 | WBGene00016562 | WP:CE08660 | WP:CE40195
UTGB	GTSSWE200550.05	outron	C41D11.4	C41D11.4	chrI	4444426	-	40	0	319	268	C41D11.4 | CE32827 | WBGene00016563 | WP:CE32827
UTGB	GTSSWE200551.05	outron	eif-3.H	C41D11.2	chrI	4444521	+	29	15.75	210	199	C41D11.2 | CE29220 | WBGene00001231 | WP:CE29220 | eif-3.H
UTGB	GTSSWE200552.01	outron	cps-6	C41D11.8.1	chrI	4448478	-	15	0	22	15	C41D11.8 | C41D11.8.1 | C41D11.8.2 | CE29488 | WBGene00000787 | WP:CE29488 | cps-6
UTGB	GTSSWE200553.01	outron	C41D11.9	C41D11.9	chrI	4449973	-	28	10.05	197	197	C41D11.9 | CE29489 | WBGene00016567 | WP:CE29489
UTGB	GTSSWE200554.04	outron	C41D11.5	C41D11.5	chrI	4451080	-	71	5.164	155	151	C41D11.5 | CE27841 | WBGene00016564 | WP:CE27841
UTGB	GTSSWE200555.01	exon	C41D11.7.1	C41D11.7.1	chrI	4458618	-	20	0	1811	-1	C41D11.7 | C41D11.7.1 | C41D11.7.2 | CE36108 | WBGene00016566 | WP:CE36108 | eri-7
UTGB	GTSSWE200556.02	outron	eri-6	C41D11.1	chrI	4457363	+	24	2.258	29	21	C41D11.1 | C41D11.1a | C41D11.1b | C41D11.1c | C41D11.1c.1 | C41D11.1c.2 | C41D11.1d | C41D11.1e | C41D11.1f | C41D11.1f.1 | C41D11.1f.2 | CE08658 | CE36713 | CE43740 | CE43749 | CE43795 | CE43808 | WBGene00016561 | WP:CE08658 | WP:CE36713 | WP:CE43740 | WP:CE43749 | WP:CE43795 | WP:CE43808 | eri-6
UTGB	GTSSWE200557.01	exon	C41D11.6	C41D11.6	chrI	4463401	-	12	0	695	-1	C41D11.6 | CE08663 | WBGene00016565 | WP:CE08663
UTGB	GTSSWE200558.02	exon	T01A4.3	T01A4.3	chrI	4461665	+	23	0	2190	-1	T01A4.3
UTGB	GTSSWE200559.02	outron	T01A4.2	T01A4.2	chrI	4480433	+	15	0	806	772	T01A4.2
UTGB	GTSSWE200560.04	outron	gcy-28	T01A4.1c	chrI	4491067	+	27	0	666	636	CE25977 | CE33582 | CE33583 | CE43478 | T01A4.1 | T01A4.1a | T01A4.1b | T01A4.1c | T01A4.1d | WBGene00020131 | WP:CE25977 | WP:CE33582 | WP:CE33583 | WP:CE43478 | gcy-28
UTGB	GTSSWE200561.03	outron	Y119C1B.4	Y119C1B.4	chrI	4511228	-	44	12.59	102	100	CE27233 | WBGene00022470 | WP:CE27233 | Y119C1B.4
UTGB	GTSSWE200562.01	outron	Y119C1B.5	Y119C1B.5	chrI	4516237	-	12	0	179	152	CE27234 | WBGene00022471 | WP:CE27234 | Y119C1B.5
UTGB	GTSSWE200563.01	exon	Y119C1B.12	Y119C1B.12	chrI	4517231	+	10	0	2840	-1	CE39967 | WBGene00044754 | WP:CE39967 | Y119C1B.12
UTGB	GTSSWE200564.10	outron	bet-1	Y119C1B.8a	chrI	4536035	-	331	0.3832	1235	1235	CE33207 | CE44037 | WBGene00022473 | WP:CE33207 | WP:CE44037 | Y119C1B.8 | Y119C1B.8a | Y119C1B.8b | Y119C1B.8b.1 | Y119C1B.8b.2 | bet-1 | tag-332
UTGB	GTSSWE200565.01	outron	Y119C1B.9	Y119C1B.9	chrI	4540942	-	14	0	1233	1217	CE44070 | WBGene00022474 | WP:CE44070 | Y119C1B.9
UTGB	GTSSWE200566.01	exon	Y119C1B.11	Y119C1B.11	chrI	4555428	-	29	0	2305	-1	CE38737 | WBGene00044441 | WP:CE38737 | Y119C1B.11
UTGB	GTSSWE200567.06	outron	Y119C1B.10	Y119C1B.10	chrI	4557158	-	528	0.3938	345	341	CE40213 | CE42694 | WBGene00022475 | WP:CE40213 | WP:CE42694 | Y119C1B.10 | Y119C1B.10a | Y119C1B.10b
UTGB	GTSSWE200569.03	outron	pqn-24	D1007.14	chrI	4564080	+	219	10.69	61	51	CE39094 | D1007.14 | WBGene00004113 | WP:CE39094 | pqn-24
UTGB	GTSSWE200570.01	outron	ceh-17	D1007.1	chrI	4571078	-	32	0	1052	1049	CE09036 | D1007.1 | WBGene00000440 | WP:CE09036 | ceh-17 | ceh-42
UTGB	GTSSWE200571.01	outron	D1007.4	D1007.4	chrI	4580987	-	53	1.661	401	384	CE09039 | D1007.4 | WBGene00017002 | WP:CE09039
UTGB	GTSSWE200572.03	outron	D1007.5	D1007.5a	chrI	4583859	-	30	1.845	53	47	CE29034 | CE33577 | D1007.5 | D1007.5a | D1007.5b | D1007.5b.1 | D1007.5b.2 | WBGene00017003 | WP:CE29034 | WP:CE33577
UTGB	GTSSWE200573.05	outron	rps-10	D1007.6.1	chrI	4584803	-	160	0.4322	310	296	CE09041 | D1007.6 | D1007.6.1 | D1007.6.2 | WBGene00004479 | WP:CE09041 | rps-10
UTGB	GTSSWE200575.03	outron	D1007.10	D1007.10b	chrI	4586230	+	34	0	45	44	CE09045 | CE34282 | CE36921 | D1007.10 | D1007.10a | D1007.10b | D1007.10b.1 | D1007.10b.2 | D1007.10c | WBGene00017007 | WP:CE09045 | WP:CE34282 | WP:CE36921
UTGB	GTSSWE200576.02	outron	D1007.19	D1007.19	chrI	4592367	-	22	0	2466	2451	CE40451 | D1007.19 | WBGene00045048 | WP:CE40451
UTGB	GTSSWE200578.01	outron	eaf-1	D1007.16	chrI	4603099	+	63	0	125	119	CE40450 | D1007.16 | WBGene00017011 | WP:CE40450 | eaf-1
UTGB	GTSSWE200579.02	outron	D1007.8	D1007.8	chrI	4604067	+	22	0.8165	337	337	CE36119 | D1007.8 | WBGene00017005 | WP:CE36119
UTGB	GTSSWE200580.01	exon	C44E4.5	C44E4.5	chrI	4605679	+	24	0	11	-1	C44E4.5 | C44E4.8 | CE41306 | CE41308 | WBGene00016654 | WBGene00045479 | WP:CE41306 | WP:CE41308
UTGB	GTSSWE200581.01	exon	C44E4.1	C44E4.1c	chrI	4623251	-	11	0	277	-1	C44E4.1 | C44E4.1a | C44E4.1b | C44E4.1b.1 | C44E4.1b.2 | C44E4.1c | CE23594 | CE23595 | CE30434 | WBGene00016650 | WP:CE23594 | WP:CE23595 | WP:CE30434
UTGB	GTSSWE200582.02	exon	C44E4.7	C44E4.7	chrI	4631444	-	33	4.068	1975	-1	C44E4.7 | CE41307 | WBGene00016656 | WP:CE41307
UTGB	GTSSWE200584.01	outron	C44E4.4	C44E4.4	chrI	4632992	+	26	0	1119	1112	C44E4.4 | CE08718 | WBGene00016653 | WP:CE08718
UTGB	GTSSWE200585.02	outron	acbp-1	C44E4.6.2	chrI	4636608	-	28	0	265	227	C44E4.6 | C44E4.6.1 | C44E4.6.2 | C44E4.6.3 | CE08720 | WBGene00016655 | WP:CE08720 | acbp-1
UTGB	GTSSWE200586.01	outron	C44E4.3	C44E4.3	chrI	4640966	-	12	0	92	82	C44E4.3 | CE34271 | WBGene00016652 | WP:CE34271
UTGB	GTSSWE200587.07	outron	Y119C1A.1	Y119C1A.1	chrI	4645300	-	35	0	1243	1229	CE40579 | WBGene00022466 | WP:CE40579 | Y119C1A.1
UTGB	GTSSWE200588.08	outron	B0041.3	B0041.3	chrI	4644467	+	27	0	214	182	B0041.3 | CE07668 | WBGene00015008 | WP:CE07668
UTGB	GTSSWE200589.04	outron	rpl-4	B0041.4.1	chrI	4647198	-	80	2.535	239	233	B0041.4 | B0041.4.1 | B0041.4.2 | CE07669 | WBGene00004415 | WP:CE07669 | rpl-4
UTGB	GTSSWE200590.04	outron	B0041.8	B0041.8.1	chrI	4647349	+	629	16.98	76	76	B0041.8 | B0041.8.1 | B0041.8.2 | CE29528 | WBGene00015011 | WP:CE29528
UTGB	GTSSWE200592.01	exon	ptps-1	B0041.6a	chrI	4654283	-	54	0	1375	-1	B0041.6 | B0041.6a | B0041.6b | CE34237 | CE39541 | WBGene00015010 | WP:CE34237 | WP:CE39541 | ptps-1
UTGB	GTSSWE200593.08	outron	ain-2	B0041.2b	chrI	4654305	+	51	0.5878	1066	1045	B0041.2 | B0041.2a | B0041.2a.1 | B0041.2a.2 | B0041.2b | B0041.2b.1 | B0041.2b.2 | B0041.2c | CE27563 | CE29526 | CE33546 | WBGene00015007 | WP:CE27563 | WP:CE29526 | WP:CE33546 | ain-2
UTGB	GTSSWE200594.01	exon	B0041.1	B0041.1	chrI	4663572	+	20	0	1300	-1	B0041.1 | CE45125 | WBGene00015006 | WP:CE45125
UTGB	GTSSWE200595.06	outron	xnp-1	B0041.7	chrI	4672218	-	70	0.466	502	478	B0041.7 | CE17314 | WBGene00006961 | WP:CE17314 | slr-8 | xnp-1
UTGB	GTSSWE200596.08	outron	unc-57	T04D1.3c	chrI	4673564	+	38	0	1576	1572	CE37042 | CE39765 | CE41009 | CE42509 | T04D1.3 | T04D1.3a | T04D1.3b | T04D1.3c | T04D1.3d | WBGene00006791 | WP:CE37042 | WP:CE39765 | WP:CE41009 | WP:CE42509 | unc-57
UTGB	GTSSWE200597.15	exon	T04D1.2	T04D1.2	chrI	4679647	+	185	1.533	25	-1	CE18194 | T04D1.2 | WBGene00020212 | WP:CE18194
UTGB	GTSSWE200599.11	outron	W09C3.4	W09C3.4	chrI	4703369	+	112	8.107	1254	1242	CE14750 | W09C3.4 | WBGene00021112 | WP:CE14750
UTGB	GTSSWE200600.02	exon	W09C3.3	W09C3.3	chrI	4705862	+	14	0	2240	-1	CE36728 | W09C3.3 | WBGene00021111 | WP:CE36728
UTGB	GTSSWE200601.02	outron	W09C3.7	W09C3.7	chrI	4715371	-	13	0	208	161	CE14756 | W09C3.7 | WBGene00021114 | WP:CE14756
UTGB	GTSSWE200602.01	exon	W09C3.8	W09C3.8	chrI	4719556	-	11	0	2113	-1	CE39115 | W09C3.8 | WBGene00021115 | WP:CE39115
UTGB	GTSSWE200603.04	exon	ugt-26	C10H11.6a	chrI	4721191	+	30	0	16	-1	C10H11.6 | C10H11.6a | C10H11.6b | CE30597 | CE42349 | WBGene00015695 | WP:CE30597 | WP:CE42349 | ugt-26
UTGB	GTSSWE200604.04	exon	ugt-28	C10H11.4	chrI	4727309	+	239	1.549	23	-1	C10H11.4 | CE08093 | WBGene00015693 | WP:CE08093 | ugt-28
UTGB	GTSSWE200605.01	exon	ugt-25	C10H11.3	chrI	4731604	+	42	0.6746	20	-1	C10H11.3 | CE08092 | WBGene00015692 | WP:CE08092 | ugt-25
UTGB	GTSSWE200608.07	outron	viln-1	C10H11.1	chrI	4753711	+	30	0	39	31	C10H11.1 | CE29081 | WBGene00015691 | WP:CE29081 | viln-1
UTGB	GTSSWE200609.02	outron	M04F3.3	M04F3.3	chrI	4767841	-	16	0	2699	2671	CE39108 | M04F3.3 | WBGene00019769 | WP:CE39108
UTGB	GTSSWE200610.04	exon	M04F3.2	M04F3.2	chrI	4765624	+	18	0	131	-1	CE40571 | M04F3.2 | WBGene00019768 | WP:CE40571
UTGB	GTSSWE200611.10	outron	rpa-2	M04F3.1.1	chrI	4768022	+	73	0	2283	2271	CE12414 | M04F3.1 | M04F3.1.1 | M04F3.1.2 | M04F3.1.3 | WBGene00019767 | WP:CE12414 | rpa-2
UTGB	GTSSWE200612.11	outron	M04F3.4	M04F3.4	chrI	4773061	-	139	0.7983	35	35	CE40264 | M04F3.4 | M04F3.4a | M04F3.4b | WBGene00019770 | WP:CE40264
UTGB	GTSSWE200613.16	outron	M04F3.5	M04F3.5	chrI	4778804	-	33	0.703	1086	1085	CE31974 | M04F3.5 | WBGene00019771 | WP:CE31974
UTGB	GTSSWE200616.01	outron	gnrr-1	F54D7.3	chrI	4797779	+	10	0	2320	2205	CE17102 | F54D7.3 | WBGene00018798 | WP:CE17102 | gnrr-1
UTGB	GTSSWE200617.06	outron	F54D7.2	F54D7.2	chrI	4805552	+	101	0.9517	73	56	CE36936 | F54D7.2 | F54D7.2.1 | F54D7.2.2 | WBGene00018797 | WP:CE36936
UTGB	GTSSWE200618.02	outron	htp-3	F57C9.5	chrI	4827025	+	19	0	55	48	CE11330 | F57C9.5 | WBGene00002034 | WP:CE11330 | htp-3
UTGB	GTSSWE200619.02	outron	F57C9.4	F57C9.4b	chrI	4830002	+	43	0	139	134	CE28474 | CE28475 | CE40970 | F57C9.4 | F57C9.4a | F57C9.4b | F57C9.4b.1 | F57C9.4b.2 | F57C9.4c | WBGene00019011 | WP:CE28474 | WP:CE28475 | WP:CE40970
UTGB	GTSSWE200620.02	outron	F57C9.3	F57C9.3	chrI	4835724	+	19	0	464	464	CE32682 | F57C9.3 | WBGene00019010 | WP:CE32682
UTGB	GTSSWE200622.01	exon	F57C9.1	F57C9.1b	chrI	4847350	+	35	6.802	1640	-1	CE11322 | CE44115 | F57C9.1 | F57C9.1a | F57C9.1b | WBGene00019008 | WP:CE11322 | WP:CE44115
UTGB	GTSSWE200623.01	outron	F25F8.1	F25F8.1	chrI	4882075	+	26	0	2839	2829	CE32636 | F25F8.1 | F25F8.1.1 | F25F8.1.2 | WBGene00017795 | WP:CE32636
UTGB	GTSSWE200625.04	exon	F21F3.4	F21F3.4	chrI	4895963	+	53	2.94	41	-1	CE41225 | F21F3.4 | WBGene00017674 | WP:CE41225
UTGB	GTSSWE200626.01	exon	unc-38	F21F3.5	chrI	4901018	-	23	0	116	-1	CE24908 | F21F3.5 | WBGene00006774 | WP:CE24908 | tmr-2 | unc-38
UTGB	GTSSWE200627.01	exon	F21F3.3	F21F3.3	chrI	4901973	+	24	0	26	-1	CE09533 | F21F3.3 | WBGene00017673 | WP:CE09533
UTGB	GTSSWE200628.06	outron	F21F3.6	F21F3.6.1	chrI	4916310	-	30	9.15	2264	2261	CE09536 | F21F3.6 | F21F3.6.1 | F21F3.6.2 | WBGene00017675 | WP:CE09536
UTGB	GTSSWE200629.05	outron	F21F3.7	F21F3.7	chrI	4917790	+	38	0.7808	607	605	CE36379 | F21F3.7 | WBGene00017676 | WP:CE36379
UTGB	GTSSWE200630.01	outron	imb-1	F28B3.8	chrI	4926510	-	173	13.36	313	275	CE30523 | F28B3.8 | F28B3.8.1 | F28B3.8.2 | WBGene00002075 | WP:CE30523 | imb-1
UTGB	GTSSWE200631.04	outron	F28B3.5	F28B3.5a	chrI	4926622	+	255	1.645	112	90	CE28826 | CE33383 | F28B3.5 | F28B3.5a | F28B3.5b | WBGene00017886 | WP:CE28826 | WP:CE33383
UTGB	GTSSWE200632.04	outron	acl-11	F28B3.9	chrI	4928711	+	20	0	389	389	CE37364 | F28B3.9 | WBGene00017888 | WP:CE37364 | acl-11
UTGB	GTSSWE200633.19	exon	F28B3.4	F28B3.4	chrI	4933186	+	428	0.715	933	-1	CE41897 | F28B3.4 | WBGene00017885 | WP:CE41897
UTGB	GTSSWE200635.01	outron	F28B3.10	F28B3.10.1	chrI	4950775	-	56	11.92	368	363	CE28924 | F28B3.10 | F28B3.10.1 | F28B3.10.2 | WBGene00017889 | WP:CE28924
UTGB	GTSSWE200636.05	outron	F28B3.6	F28B3.6.1	chrI	4951612	-	37	0	141	129	CE33384 | F28B3.6 | F28B3.6.1 | F28B3.6.2 | WBGene00017887 | WP:CE33384
UTGB	GTSSWE200637.02	outron	him-1	F28B3.7a.1	chrI	4957724	-	27	0	62	55	CE39925 | CE42002 | F28B3.7 | F28B3.7a | F28B3.7a.1 | F28B3.7a.2 | F28B3.7b | WBGene00001860 | WP:CE39925 | WP:CE42002 | him-1 | smc-1
UTGB	GTSSWE200638.05	outron	W03G9.8	W03G9.8	chrI	4958310	-	1721	1.133	154	114	CE42695 | W03G9.8 | WBGene00044431 | WP:CE42695
UTGB	GTSSWE200639.02	exon	W03G9.3	W03G9.3	chrI	4958394	+	26	1.752	1099	-1	CE14558 | W03G9.3 | WBGene00021015 | WP:CE14558
UTGB	GTSSWE200641.07	outron	snf-1	W03G9.1.1	chrI	4977831	+	42	1.219	2500	2477	CE30701 | W03G9.1 | W03G9.1.1 | W03G9.1.2 | WBGene00004900 | WP:CE30701 | snf-1
UTGB	GTSSWE200642.06	exon	dyf-1	F54C1.5a	chrI	4994632	-	274	1.124	51	-1	CE33108 | CE33109 | F54C1.5 | F54C1.5a | F54C1.5b | F54C1.5b.1 | F54C1.5b.2 | WBGene00001117 | WP:CE33108 | WP:CE33109 | dyf-1
UTGB	GTSSWE200643.02	outron	mes-3	F54C1.3a	chrI	4993914	+	42	1.986	2931	2928	CE11046 | CE36305 | F54C1.3 | F54C1.3a | F54C1.3b | WBGene00003221 | WP:CE11046 | WP:CE36305 | mes-3
UTGB	GTSSWE200644.13	outron	dom-3	F54C1.2.2	chrI	5003292	+	35	0	173	159	CE11044 | F54C1.2 | F54C1.2.1 | F54C1.2.2 | WBGene00001050 | WP:CE11044 | dom-3
UTGB	GTSSWE200645.01	outron	F54C1.6	F54C1.6	chrI	5018750	-	19	0	2489	2437	CE11050 | F54C1.6 | WBGene00018791 | WP:CE11050
UTGB	GTSSWE200646.01	exon	pat-10	F54C1.7.1	chrI	5020086	-	38	1.521	22	-1	CE11052 | F54C1.7 | F54C1.7.1 | F54C1.7.10 | F54C1.7.2 | F54C1.7.3 | F54C1.7.4 | F54C1.7.5 | F54C1.7.6 | F54C1.7.7 | F54C1.7.8 | F54C1.7.9 | WBGene00003934 | WP:CE11052 | pat-10 | tnc-1
UTGB	GTSSWE200647.03	exon	C46H11.6	C46H11.6	chrI	5020614	+	24	0	263	-1	C46H11.6 | CE08788 | WBGene00016730 | WP:CE08788
UTGB	GTSSWE200648.03	outron	lfe-2	C46H11.4c	chrI	5025561	+	45	0	1650	1594	C46H11.4 | C46H11.4a | C46H11.4b | C46H11.4c | C46H11.4d | C46H11.4e | C46H11.4f | CE27862 | CE27863 | CE27864 | CE43446 | CE43449 | CE43466 | WBGene00002979 | WP:CE27862 | WP:CE27863 | WP:CE27864 | WP:CE43446 | WP:CE43449 | WP:CE43466 | lfe-2
UTGB	GTSSWE200649.01	outron	C46H11.3	C46H11.3	chrI	5040778	+	37	4.323	714	711	C46H11.3 | CE08785 | WBGene00016729 | WP:CE08785
UTGB	GTSSWE200650.01	exon	C46H11.7	C46H11.7	chrI	5043066	-	205	0.9842	10	-1	C46H11.7 | CE08789 | WBGene00016731 | WP:CE08789
UTGB	GTSSWE200651.01	exon	phat-1	C46H11.8	chrI	5045734	-	369	1.021	10	-1	C46H11.8 | CE34274 | WBGene00016732 | WP:CE34274 | phat-1
UTGB	GTSSWE200652.02	exon	phat-2	C46H11.9	chrI	5048018	-	134	1.765	24	-1	C46H11.9 | CE08791 | WBGene00016733 | WP:CE08791 | phat-2
UTGB	GTSSWE200653.02	outron	C46H11.2	C46H11.2	chrI	5049543	+	21	0	588	588	C46H11.2 | CE08784 | WBGene00016728 | WP:CE08784
UTGB	GTSSWE200654.03	outron	C46H11.10	C46H11.10b.1	chrI	5055581	-	18	0	1485	1239	C46H11.10 | C46H11.10a | C46H11.10b | C46H11.10b.1 | C46H11.10b.2 | C46H11.10b.3 | CE34272 | CE34273 | WBGene00016734 | WP:CE34272 | WP:CE34273
UTGB	GTSSWE200655.01	exon	C46H11.1	C46H11.1	chrI	5053414	+	13	0	2275	-1	C46H11.1 | CE08783 | WBGene00016727 | WP:CE08783
UTGB	GTSSWE200656.06	outron	fhod-1	C46H11.11	chrI	5069180	-	22	0	348	347	C46H11.11 | CE41309 | WBGene00016735 | WP:CE41309 | fhod-1
UTGB	GTSSWE200657.03	outron	vha-16	C30F8.2.1	chrI	5082416	-	102	15.93	155	147	C30F8.2 | C30F8.2.1 | C30F8.2.2 | C30F8.2.3 | C30F8.2.4 | CE29684 | WBGene00016258 | WP:CE29684 | vha-16
UTGB	GTSSWE200659.02	outron	C30F8.3	C30F8.3	chrI	5093784	+	30	0	2820	2819	C30F8.3 | CE44727 | WBGene00016259 | WP:CE44727
UTGB	GTSSWE200660.03	exon	Y110A7A.20	Y110A7A.20	chrI	5100760	+	47	1.959	9	-1	CE23246 | WBGene00022465 | WP:CE23246 | Y110A7A.20
UTGB	GTSSWE200662.06	outron	chp-1	Y110A7A.13	chrI	5104959	-	94	1.471	44	44	CE23244 | WBGene00000502 | WP:CE23244 | Y110A7A.13 | chp | chp-1
UTGB	GTSSWE200663.05	outron	pas-3	Y110A7A.14.1	chrI	5106140	-	90	0.5707	91	88	CE30307 | WBGene00003924 | WP:CE30307 | Y110A7A.14 | Y110A7A.14.1 | Y110A7A.14.2 | pas-3
UTGB	GTSSWE200664.04	exon	use-1	Y110A7A.11	chrI	5106255	+	87	10.07	41	-1	CE34394 | WBGene00022460 | WP:CE34394 | Y110A7A.11 | use-1
UTGB	GTSSWE200665.01	outron	aap-1	Y110A7A.10	chrI	5107662	+	26	0	185	184	CE23248 | WBGene00000001 | WP:CE23248 | Y110A7A.10 | Y110A7A.10.1 | Y110A7A.10.2 | aap-1
UTGB	GTSSWE200666.02	exon	Y110A7A.21	Y110A7A.21	chrI	5111371	-	96	0.5165	234	-1	CE40664 | WBGene00045212 | WP:CE40664 | Y110A7A.21
UTGB	GTSSWE200667.02	outron	Y110A7A.15	Y110A7A.15a	chrI	5113797	-	16	0	55	41	CE30705 | CE33206 | WBGene00022462 | WP:CE30705 | WP:CE33206 | Y110A7A.15 | Y110A7A.15a | Y110A7A.15b
UTGB	GTSSWE200668.08	outron	elpc-1	Y110A7A.16	chrI	5118890	-	42	10.03	39	34	CE28103 | WBGene00022463 | WP:CE28103 | Y110A7A.16 | elpc-1
UTGB	GTSSWE200670.07	outron	mat-1	Y110A7A.17a	chrI	5127617	-	98	1.187	426	414	CE23241 | CE37056 | WBGene00003132 | WP:CE23241 | WP:CE37056 | Y110A7A.17 | Y110A7A.17a | Y110A7A.17b | Y110A7A.17b.1 | Y110A7A.17b.2 | apc-3 | cdc-27 | mat-1 | pod-5
UTGB	GTSSWE200672.02	outron	Y110A7A.7	Y110A7A.7	chrI	5129667	+	16	0	115	81	CE23251 | WBGene00022457 | WP:CE23251 | Y110A7A.7
UTGB	GTSSWE200673.07	outron	Y110A7A.6	Y110A7A.6b.1	chrI	5131511	+	64	0.682	14	12	CE29606 | CE38000 | WBGene00022456 | WP:CE29606 | WP:CE38000 | Y110A7A.6 | Y110A7A.6a | Y110A7A.6a.1 | Y110A7A.6a.2 | Y110A7A.6a.3 | Y110A7A.6b | Y110A7A.6b.1 | Y110A7A.6b.2 | Y110A7A.6b.3
UTGB	GTSSWE200674.04	outron	mtm-1	Y110A7A.5	chrI	5134682	+	79	0.5868	88	62	CE30707 | WBGene00003475 | WP:CE30707 | Y110A7A.5 | mtm-1
UTGB	GTSSWE200675.01	outron	Y110A7A.4	Y110A7A.4	chrI	5138149	+	262	15.04	124	115	CE24124 | WBGene00022455 | WP:CE24124 | Y110A7A.4
UTGB	GTSSWE200676.03	outron	unc-63	Y110A7A.3	chrI	5141537	+	21	0	145	141	CE30706 | WBGene00006797 | WP:CE30706 | Y110A7A.3 | lev-7 | tmr-3 | unc-63
UTGB	GTSSWE200678.04	outron	Y110A7A.19	Y110A7A.19.1	chrI	5164949	-	87	1.69	76	61	CE23238 | WBGene00022464 | WP:CE23238 | Y110A7A.19 | Y110A7A.19.1 | Y110A7A.19.2
UTGB	GTSSWE200679.05	outron	hcp-6	Y110A7A.1b	chrI	5165095	+	111	2.181	65	60	CE24117 | CE28104 | WBGene00001833 | WP:CE24117 | WP:CE28104 | Y110A7A.1 | Y110A7A.1a | Y110A7A.1b | hcp-6
UTGB	GTSSWE200681.02	exon	npp-6	F56A3.3a.2	chrI	5175051	+	22	0.6608	1418	-1	CE11218 | CE30281 | F56A3.3 | F56A3.3a | F56A3.3a.1 | F56A3.3a.2 | F56A3.3b | WBGene00003792 | WP:CE11218 | WP:CE30281 | npp-6
UTGB	GTSSWE200682.06	outron	slx-1	F56A3.2	chrI	5182675	+	68	0	64	64	CE11216 | F56A3.2 | WBGene00018909 | WP:CE11216 | giyd-1 | slx-1
UTGB	GTSSWE200683.04	exon	bro-1	F56A3.5	chrI	5186938	+	69	5.237	50	-1	CE28461 | F56A3.5 | WBGene00000272 | WP:CE28461 | bro-1
UTGB	GTSSWE200684.02	outron	fncm-1	F56A3.1	chrI	5188663	+	56	2.178	1488	1484	CE28460 | F56A3.1 | WBGene00018908 | WP:CE28460 | fncm-1
UTGB	GTSSWE200685.01	outron	pde-5	C32E12.2	chrI	5195501	+	17	0	580	572	C32E12.2 | CE45035 | WBGene00016328 | WP:CE45035 | pde-5
UTGB	GTSSWE200686.17	exon	osr-1	C32E12.3	chrI	5203444	-	61	2.717	34	-1	C32E12.3 | CE30495 | WBGene00016329 | WP:CE30495 | osr-1
UTGB	GTSSWE200687.02	outron	sem-2	C32E12.5.1	chrI	5211020	-	49	11.88	2895	2888	C32E12.5 | C32E12.5.1 | C32E12.5.2 | CE30497 | WBGene00004771 | WP:CE30497 | sem-2 | sox-1
UTGB	GTSSWE200688.03	outron	C32E12.4	C32E12.4	chrI	5243250	-	18	2.638	1371	1332	C32E12.4 | CE41876 | WBGene00016330 | WP:CE41876
UTGB	GTSSWE200689.04	exon	B0261.4	B0261.4a	chrI	5244347	+	74	7.152	49	-1	B0261.4 | B0261.4a | B0261.4b | CE39547 | CE39548 | WBGene00015092 | WP:CE39547 | WP:CE39548
UTGB	GTSSWE200690.03	outron	let-363	B0261.2b	chrI	5245651	+	20	0	133	95	B0261.2 | B0261.2a | B0261.2b | B0261.2b.1 | B0261.2b.2 | CE32559 | CE32560 | CeTor | WBGene00002583 | WP:CE32559 | WP:CE32560 | let-363
UTGB	GTSSWE200691.01	exon	B0261.6	B0261.6a	chrI	5258762	-	36	0	1861	-1	B0261.6 | B0261.6a | B0261.6b | CE29532 | CE39549 | WBGene00015094 | WP:CE29532 | WP:CE39549
UTGB	GTSSWE200692.01	outron	B0261.1	B0261.1	chrI	5263027	+	44	18.2	684	670	B0261.1 | CE29531 | WBGene00015091 | WP:CE29531
UTGB	GTSSWE200693.07	outron	B0261.8	B0261.8	chrI	5272631	-	58	0.4517	596	592	B0261.8 | CE34240 | WBGene00015096 | WP:CE34240
UTGB	GTSSWE200694.09	exon	C01G8.1	C01G8.1b	chrI	5274248	-	341	0.8659	36	-1	C01G8.1 | C01G8.1a | C01G8.1b | CE07801 | CE41975 | WBGene00015312 | WP:CE07801 | WP:CE41975
UTGB	GTSSWE200695.04	outron	C01G8.2.1	C01G8.2.1	chrI	5278959	-	35	0	257	256	C01G8.2 | C01G8.2.1 | C01G8.2.2 | CE07802 | WBGene00000540 | WP:CE07802 | cln-3.2
UTGB	GTSSWE200696.03	outron	dhs-1	C01G8.3	chrI	5281584	-	11	0	64	56	C01G8.3 | CE07803 | WBGene00000965 | WP:CE07803 | dhs-1
UTGB	GTSSWE200697.16	outron	dnj-4	C01G8.4	chrI	5284323	-	176	9.736	393	375	C01G8.4 | CE26905 | WBGene00001022 | WP:CE26905 | dnj-4
UTGB	GTSSWE200699.09	outron	C01G8.6	C01G8.6	chrI	5301655	-	120	0.9091	1345	1320	C01G8.6 | CE07807 | WBGene00015313 | WP:CE07807
UTGB	GTSSWE200700.44	exon	let-526	C01G8.9a	chrI	5311354	-	52	1.099	436	-1	C01G8.9 | C01G8.9a | C01G8.9b | CE30415 | CE33359 | WBGene00002717 | WP:CE30415 | WP:CE33359 | let-526 | lss-4 | psa-10
UTGB	GTSSWE200702.11	exon	F48C1.3	F48C1.3	chrI	5313399	+	253	7.81	937	-1	CE10736 | F48C1.3 | WBGene00018596 | WP:CE10736
UTGB	GTSSWE200703.13	outron	F48C1.6	F48C1.6	chrI	5319290	-	56	1.666	15	13	CE10742 | F48C1.6 | WBGene00018599 | WP:CE10742
UTGB	GTSSWE200704.02	outron	fbxa-145	F48C1.2	chrI	5316784	+	176	4.095	2950	2941	CE34311 | F48C1.2 | WBGene00018595 | WP:CE34311 | fbxa-145
UTGB	GTSSWE200705.01	exon	aman-3	F48C1.1	chrI	5322300	+	11	0	2214	-1	CE36934 | F48C1.1 | WBGene00018594 | WP:CE36934 | aman-3
UTGB	GTSSWE200706.01	exon	F48C1.9.1	F48C1.9.1	chrI	5332783	-	35	1.014	19	-1	CE31350 | F48C1.9 | F48C1.9.1 | F48C1.9.2 | WBGene00018601 | WP:CE31350
UTGB	GTSSWE200707.01	exon	F48C1.8	F48C1.8	chrI	5339584	-	36	0	1625	-1	CE45198 | F48C1.8 | WBGene00018600 | WP:CE45198
UTGB	GTSSWE200708.01	exon	F55A12.6	F55A12.6	chrI	5337183	+	10	0	1742	-1	CE36649 | F55A12.6 | WBGene00018865 | WP:CE36649
UTGB	GTSSWE200709.05	outron	apm-1	F55A12.7	chrI	5345279	-	49	0	571	551	CE30145 | F55A12.7 | WBGene00000150 | WP:CE30145 | apm-1
UTGB	GTSSWE200710.02	outron	F55A12.5	F55A12.5	chrI	5344530	+	247	6.013	1401	1400	CE11125 | F55A12.5 | WBGene00018864 | WP:CE11125
UTGB	GTSSWE200711.02	outron	F55A12.8	F55A12.8	chrI	5354165	-	24	0	394	394	CE11131 | F55A12.8 | WBGene00018866 | WP:CE11131
UTGB	GTSSWE200712.04	outron	ppk-1	F55A12.3	chrI	5358307	+	39	0	221	218	CE30541 | F55A12.3 | WBGene00004087 | WP:CE30541 | ppk-1
UTGB	GTSSWE200713.03	outron	F55A12.2	F55A12.2a	chrI	5364745	+	29	0.6231	1141	523	CE29396 | CE30540 | CE34317 | CE34318 | F55A12.2 | F55A12.2a | F55A12.2b | F55A12.2c | F55A12.2c.1 | F55A12.2c.2 | F55A12.2d | WBGene00018863 | WP:CE29396 | WP:CE30540 | WP:CE34317 | WP:CE34318
UTGB	GTSSWE200714.01	outron	F55A12.10	F55A12.10	chrI	5367858	-	24	0	38	25	CE28451 | F55A12.10 | F55A12.10.1 | F55A12.10.2 | WBGene00018867 | WP:CE28451
UTGB	GTSSWE200715.02	outron	F55A12.1	F55A12.1	chrI	5366977	+	16	0	1504	1480	CE11117 | F55A12.1 | WBGene00018862 | WP:CE11117
UTGB	GTSSWE200716.03	outron	pqn-44	F55A12.9d.4	chrI	5377903	-	25	0	1582	1558	CE08345 | CE26925 | CE30809 | CE33399 | F55A12.9 | F55A12.9a | F55A12.9b | F55A12.9c | F55A12.9d | F55A12.9d.1 | F55A12.9d.2 | F55A12.9d.3 | F55A12.9d.4 | F55A12.9d.5 | WBGene00004131 | WP:CE08345 | WP:CE26925 | WP:CE30809 | WP:CE33399 | pqn-44
UTGB	GTSSWE200717.01	exon	C24A11.2	C24A11.2	chrI	5377863	+	11	0	2300	-1	C24A11.2 | CE08343 | WBGene00016041 | WP:CE08343
UTGB	GTSSWE200718.01	exon	C24A11.5	C24A11.5	chrI	5386714	-	24	0	973	-1	C24A11.5 | CE08346 | WBGene00016042 | WP:CE08346
UTGB	GTSSWE200719.01	exon	C24A11.6	C24A11.6	chrI	5397089	-	32	0	582	-1	C24A11.6 | CE08347 | WBGene00016043 | WP:CE08347
UTGB	GTSSWE200720.01	exon	C24A11.1	C24A11.1	chrI	5399304	+	11	0	2558	-1	C24A11.1 | CE20521 | WBGene00016040 | WP:CE20521
UTGB	GTSSWE200721.08	outron	frm-4	C24A11.8a	chrI	5409710	-	71	1.715	1368	1362	C24A11.8 | C24A11.8a | C24A11.8a.1 | C24A11.8a.2 | C24A11.8b | C24A11.8c | CE19698 | CE27724 | CE43972 | WBGene00001491 | WP:CE19698 | WP:CE27724 | WP:CE43972 | frm-4
UTGB	GTSSWE200723.01	outron	C30H7.2	C30H7.2b	chrI	5420934	-	19	0	238	199	C30H7.2 | C30H7.2a | C30H7.2a.1 | C30H7.2a.2 | C30H7.2a.3 | C30H7.2a.4 | C30H7.2b | CE27807 | CE39231 | WBGene00016278 | WP:CE27807 | WP:CE39231
UTGB	GTSSWE200725.07	outron	F27C1.4	F27C1.4	chrI	5422486	+	436	0	303	286	CE09717 | F27C1.4 | WBGene00017854 | WP:CE09717
UTGB	GTSSWE200726.12	exon	F27C1.3	F27C1.3	chrI	5425142	+	33	0	1225	-1	CE28825 | F27C1.3 | WBGene00017853 | WP:CE28825
UTGB	GTSSWE200724.02	outron	F27C1.6	F27C1.6.1	chrI	5428670	-	25	0	226	218	CE09718 | F27C1.6 | F27C1.6.1 | F27C1.6.2 | WBGene00017855 | WP:CE09718
UTGB	GTSSWE200727.05	exon	atp-3	F27C1.7b	chrI	5429896	-	75	0.6385	86	-1	CE09719 | CE36139 | F27C1.7 | F27C1.7a | F27C1.7a.1 | F27C1.7a.2 | F27C1.7a.3 | F27C1.7a.4 | F27C1.7a.5 | F27C1.7b | WBGene00000230 | WP:CE09719 | WP:CE36139 | atp-3
UTGB	GTSSWE200728.09	outron	F27C1.2	F27C1.2b	chrI	5429979	+	482	2.602	191	188	CE09715 | CE36932 | F27C1.2 | F27C1.2a | F27C1.2b | F27C1.2b.1 | F27C1.2b.2 | WBGene00017852 | WP:CE09715 | WP:CE36932
UTGB	GTSSWE200729.01	outron	F27C1.13	F27C1.13	chrI	5447084	-	10	0	225	213	CE40203 | F27C1.13 | WBGene00017860 | WP:CE40203
UTGB	GTSSWE200730.04	outron	hil-8	T05E8.2	chrI	5471163	-	37	0	1532	1523	CE34363 | T05E8.2 | WBGene00001859 | WP:CE34363 | hil-8
UTGB	GTSSWE200731.04	outron	T05E8.3	T05E8.3	chrI	5479872	-	32	0	430	430	CE37043 | T05E8.3 | WBGene00020263 | WP:CE37043
UTGB	GTSSWE200732.01	outron	C09D4.4	C09D4.4c	chrI	5484805	-	30	8.076	158	143	C09D4.4 | C09D4.4a | C09D4.4b | C09D4.4c | CE34254 | CE34255 | CE34256 | WBGene00015635 | WP:CE34254 | WP:CE34255 | WP:CE34256
UTGB	GTSSWE200733.01	outron	rpl-19	C09D4.5.2	chrI	5485952	-	616	5.382	236	206	C09D4.5 | C09D4.5.1 | C09D4.5.2 | C09D4.5.3 | C09D4.5.4 | CE08034 | WBGene00004431 | WP:CE08034 | rpl-19
UTGB	GTSSWE200734.01	exon	C09D4.3	C09D4.3	chrI	5486069	+	38	1.521	2330	-1	C09D4.3 | CE27672 | WBGene00015634 | WP:CE27672
UTGB	GTSSWE200735.01	exon	C09D4.2	C09D4.2	chrI	5491500	+	14	0	3	-1	C09D4.2 | CE08031 | WBGene00015633 | WP:CE08031
UTGB	GTSSWE200736.03	exon	C09D4.1	C09D4.1a	chrI	5497682	+	22	4.735	238	-1	C09D4.1 | C09D4.1a | C09D4.1b | C09D4.1b.1 | C09D4.1b.2 | CE27671 | CE37705 | WBGene00015632 | WP:CE27671 | WP:CE37705
UTGB	GTSSWE200737.05	outron	F59A3.3	F59A3.3	chrI	5507397	-	97	1.513	370	370	CE11420 | F59A3.3 | WBGene00019076 | WP:CE11420
UTGB	GTSSWE200738.01	outron	F59A3.4	F59A3.4	chrI	5509291	-	125	14.17	118	117	CE11422 | F59A3.4 | WBGene00019077 | WP:CE11422
UTGB	GTSSWE200739.01	exon	rpa-3	F59A3.5.1	chrI	5510378	-	14	0	98	-1	CE33117 | F59A3.5 | F59A3.5.1 | F59A3.5.2 | F59A3.5.3 | WBGene00019078 | WP:CE33117 | rpa-3
UTGB	GTSSWE200740.01	outron	F59A3.2a	F59A3.2a	chrI	5509396	+	30	1.23	2670	2655	F59A3.2a | F59A3.2b
UTGB	GTSSWE200741.03	exon	F59A3.7	F59A3.7	chrI	5518778	-	49	0	211	-1	CE44044 | F59A3.7 | WBGene00019080 | WP:CE44044
UTGB	GTSSWE200742.04	outron	F59A3.1	F59A3.1	chrI	5518986	+	38	1.765	1408	1406	CE30548 | F59A3.1 | F59A3.1.1 | F59A3.1.2 | WBGene00019074 | WP:CE30548
UTGB	GTSSWE200743.10	outron	pup-3	F59A3.9	chrI	5533816	-	168	0.5014	102	100	CE11432 | F59A3.9 | WBGene00019082 | WP:CE11432 | pup-3
UTGB	GTSSWE200744.04	outron	tom-1	M01A10.2e	chrI	5545768	+	54	1.25	462	355	CE34348 | CE39751 | CE40307 | CE41684 | CE41685 | CE41686 | M01A10.2 | M01A10.2a | M01A10.2b | M01A10.2c | M01A10.2d | M01A10.2e | M01A10.2f | WBGene00006594 | WP:CE34348 | WP:CE39751 | WP:CE40307 | WP:CE41684 | WP:CE41685 | WP:CE41686 | tag-23 | tom-1 | tomo-1
UTGB	GTSSWE200745.05	outron	ostd-1	M01A10.3.1	chrI	5550548	-	108	0.6577	254	249	CE12232 | M01A10.3 | M01A10.3.1 | M01A10.3.2 | WBGene00019693 | WP:CE12232 | ostd-1
UTGB	GTSSWE200746.06	outron	M01A10.1	M01A10.1	chrI	5563858	+	154	0.4634	60	45	CE41683 | M01A10.1 | WBGene00019692 | WP:CE41683
UTGB	GTSSWE200747.01	outron	pqn-52	M01E11.4c	chrI	5571954	-	89	2.231	1873	1871	CE28610 | CE28611 | CE37032 | M01E11.4 | M01E11.4a | M01E11.4a.1 | M01E11.4a.2 | M01E11.4b | M01E11.4b.1 | M01E11.4b.2 | M01E11.4c | WBGene00019713 | WP:CE28610 | WP:CE28611 | WP:CE37032 | pqn-52
UTGB	GTSSWE200749.06	outron	M01E11.3	M01E11.3	chrI	5572090	+	52	0	1156	1127	CE12292 | M01E11.3 | WBGene00019712 | WP:CE12292
UTGB	GTSSWE200751.01	outron	M01E11.2	M01E11.2.1	chrI	5579552	+	17	0	117	117	CE12290 | M01E11.2 | M01E11.2.1 | M01E11.2.2 | WBGene00019711 | WP:CE12290
UTGB	GTSSWE200753.07	outron	F46F11.11	F46F11.11	chrI	5607622	-	211	0.4236	101	91	CE38711 | F46F11.11 | WBGene00044422 | WP:CE38711
UTGB	GTSSWE200754.01	outron	ubl-5	F46F11.4	chrI	5609589	-	22	0	749	744	CE10602 | F46F11.4 | WBGene00006726 | WP:CE10602 | ubl-5
UTGB	GTSSWE200755.02	outron	vha-10	F46F11.5.1	chrI	5610595	-	39	0.6285	337	321	CE10604 | F46F11.5 | F46F11.5.1 | F46F11.5.2 | WBGene00006919 | WP:CE10604 | vha-10
UTGB	GTSSWE200756.01	outron	F46F11.9	F46F11.9b	chrI	5616863	-	27	4.033	479	464	CE30536 | CE30537 | F46F11.9 | F46F11.9a | F46F11.9b | WBGene00018512 | WP:CE30536 | WP:CE30537
UTGB	GTSSWE200759.10	exon	F46F11.7	F46F11.7	chrI	5620780	+	730	1.531	11	-1	CE39101 | F46F11.7 | WBGene00018510 | WP:CE39101
UTGB	GTSSWE200760.03	exon	F46F11.8	F46F11.8	chrI	5626114	-	505	9.977	36	-1	CE26921 | F46F11.8 | WBGene00018511 | WP:CE26921
UTGB	GTSSWE200761.01	outron	F46F11.1	F46F11.1b	chrI	5626585	+	100	5.895	1244	1237	CE30534 | CE41904 | F46F11.1 | F46F11.1a | F46F11.1b | F46F11.1b.1 | F46F11.1b.2 | WBGene00018508 | WP:CE30534 | WP:CE41904
UTGB	GTSSWE200762.01	exon	M01A12.4	M01A12.4	chrI	5642462	+	13	0	851	-1	CE39107 | M01A12.4 | WBGene00044616 | WP:CE39107
UTGB	GTSSWE200763.01	outron	M01A12.3	M01A12.3	chrI	5644497	+	44	0	243	235	CE33534 | M01A12.3 | WBGene00019695 | WP:CE33534
UTGB	GTSSWE200764.04	outron	F55F8.2	F55F8.2a	chrI	5649893	-	45	4.106	240	233	CE11190 | CE33400 | F55F8.2 | F55F8.2a | F55F8.2b | WBGene00018890 | WP:CE11190 | WP:CE33400
UTGB	GTSSWE200765.01	outron	F55F8.3	F55F8.3	chrI	5653655	-	77	2.243	75	61	CE30542 | F55F8.3 | WBGene00018891 | WP:CE30542
UTGB	GTSSWE200766.01	outron	tag-345	F55F8.5.1	chrI	5658152	-	33	13.7	239	231	CE11196 | F55F8.5 | F55F8.5.1 | F55F8.5.2 | WBGene00018893 | WP:CE11196 | tag-345
UTGB	GTSSWE200767.02	outron	mff-2	F55F8.6	chrI	5659127	-	192	0	414	411	CE11198 | F55F8.6 | WBGene00018894 | WP:CE11198 | mff-2
UTGB	GTSSWE200768.01	exon	F55F8.7	F55F8.7	chrI	5661275	-	13	0	59	-1	CE44981 | F55F8.7 | WBGene00018895 | WP:CE44981
UTGB	GTSSWE200769.01	outron	ptr-10	F55F8.1.1	chrI	5662146	+	44	0.4795	143	141	CE36938 | F55F8.1 | F55F8.1.1 | F55F8.1.2 | WBGene00004224 | WP:CE36938 | ptr-10
UTGB	GTSSWE200770.04	outron	F55F8.8	F55F8.8	chrI	5670390	-	50	0.5747	1549	1548	CE11202 | F55F8.8 | WBGene00018896 | WP:CE11202
UTGB	GTSSWE200771.02	outron	F55F8.9	F55F8.9	chrI	5675093	-	117	1.264	1745	1737	CE44985 | CE45001 | F55F8.9 | F55F8.9a | F55F8.9a.1 | F55F8.9a.2 | F55F8.9b | WBGene00018897 | WP:CE44985 | WP:CE45001
UTGB	GTSSWE200772.02	outron	T19B4.5	T19B4.5	chrI	5673823	+	196	6.197	589	486	CE13744 | T19B4.5 | WBGene00020558 | WP:CE13744
UTGB	GTSSWE200773.12	outron	dnj-21	T19B4.4	chrI	5676488	+	48	4.866	351	342	CE13742 | T19B4.4 | WBGene00001039 | WP:CE13742 | dnj-21
UTGB	GTSSWE200774.02	outron	T19B4.3	T19B4.3.1	chrI	5677968	+	52	0	680	673	1G247 | CE13740 | T19B4.3 | T19B4.3.1 | T19B4.3.2 | WBGene00020557 | WP:CE13740
UTGB	GTSSWE200776.02	outron	npp-7	T19B4.2.1	chrI	5691855	+	52	13.88	414	412	CE13738 | T19B4.2 | T19B4.2.1 | T19B4.2.2 | WBGene00003793 | WP:CE13738 | npp-7
UTGB	GTSSWE200777.02	outron	T19B4.1	T19B4.1	chrI	5699281	+	23	0	2880	2878	CE39282 | T19B4.1 | WBGene00020556 | WP:CE39282
UTGB	GTSSWE200778.03	exon	lim-7	C04F1.3	chrI	5716592	+	976	1.897	87	-1	C04F1.3 | CE17366 | WBGene00002989 | WP:CE17366 | lim-7
UTGB	GTSSWE200780.09	outron	F56H1.6	F56H1.6	chrI	5744153	+	211	2.055	34	30	CE38609 | F56H1.6 | WBGene00044305 | WP:CE38609
UTGB	GTSSWE200781.05	exon	che-14	F56H1.1	chrI	5746640	+	467	0.7473	88	-1	CE28468 | F56H1.1 | WBGene00000493 | WP:CE28468 | che-14 | ptd-1
UTGB	GTSSWE200782.05	exon	F56H1.7	F56H1.7	chrI	5762428	-	197	8.325	57	-1	CE41412 | F56H1.7 | WBGene00045483 | WP:CE41412
UTGB	GTSSWE200783.03	exon	T22E7.2	T22E7.2	chrI	5766377	+	30	0	670	-1	CE34376 | T22E7.2 | WBGene00020694 | WP:CE34376
UTGB	GTSSWE200784.09	exon	T22E7.1	T22E7.1a	chrI	5768997	+	687	0.3396	26	-1	CE31368 | CE33189 | T22E7.1 | T22E7.1a | T22E7.1b | WBGene00020693 | WP:CE31368 | WP:CE33189
UTGB	GTSSWE200785.02	exon	hil-5	B0414.3	chrI	5774588	+	2309	1.203	36	-1	B0414.3 | CE07733 | WBGene00001856 | WP:CE07733 | hil-5
UTGB	GTSSWE200786.05	outron	rnt-1	B0414.2	chrI	5783534	+	29	13.25	310	280	B0414.2 | CE24772 | WBGene00004393 | WP:CE24772 | mab-2 | rnt-1 | run | run-1
UTGB	GTSSWE200787.01	outron	cpb-3	B0414.5	chrI	5791969	-	19	0	242	213	B0414.5 | CE41548 | WBGene00000772 | WP:CE41548 | cpb-3
UTGB	GTSSWE200789.25	outron	mtk-1	B0414.7a	chrI	5801959	-	35	0	669	656	B0414.7 | B0414.7a | B0414.7b | CE07737 | CE27573 | WBGene00003472 | WP:CE07737 | WP:CE27573 | mtk-1
UTGB	GTSSWE200790.07	outron	vps-51	B0414.8b	chrI	5807294	-	134	0.9073	49	36	B0414.8 | B0414.8a | B0414.8b | CE30413 | CE36910 | WBGene00015176 | WP:CE30413 | WP:CE36910 | vps-51
UTGB	GTSSWE200792.02	outron	C32F10.4	C32F10.4.1	chrI	5810383	-	32	0	384	377	C32F10.4 | C32F10.4.1 | C32F10.4.2 | CE08541 | WBGene00016332 | WP:CE08541
UTGB	GTSSWE200793.01	outron	hmg-3	C32F10.5	chrI	5818868	-	118	3.23	739	738	C32F10.5 | CE08542 | WBGene00001973 | WP:CE08542 | hmg-3
UTGB	GTSSWE200794.11	outron	nhr-2	C32F10.6	chrI	5821177	-	148	7.759	65	65	C32F10.6 | CE39002 | WBGene00003601 | WP:CE39002 | crf-2 | nhr-2
UTGB	GTSSWE200795.01	outron	C32F10.8	C32F10.8b.1	chrI	5827565	-	26	0	2488	2487	C32F10.8 | C32F10.8a | C32F10.8a.1 | C32F10.8a.2 | C32F10.8b | C32F10.8b.1 | C32F10.8b.2 | C32F10.8b.3 | C32F10.8b.4 | C32F10.8b.5 | CE32815 | CE33563 | WBGene00016333 | WP:CE32815 | WP:CE33563
UTGB	GTSSWE200796.10	outron	obr-4	C32F10.1a	chrI	5829113	+	71	1.016	290	281	C32F10.1 | C32F10.1a | C32F10.1a.1 | C32F10.1a.2 | C32F10.1b | CE08539 | CE32814 | WBGene00016331 | WP:CE08539 | WP:CE32814 | obr-4
UTGB	GTSSWE200797.01	exon	F33D11.2	F33D11.2	chrI	5845439	+	22	0	1825	-1	CE45187 | F33D11.2 | F33D11.2.1 | F33D11.2.2 | WBGene00018001 | WP:CE45187
UTGB	GTSSWE200798.04	outron	F33D11.8	F33D11.8	chrI	5857693	-	18	0	2668	2651	CE29785 | F33D11.8 | WBGene00018005 | WP:CE29785
UTGB	GTSSWE200799.07	outron	F33D11.9	F33D11.9b	chrI	5862816	-	36	3.331	255	246	CE30527 | CE37904 | F33D11.9 | F33D11.9a | F33D11.9a.1 | F33D11.9a.2 | F33D11.9b | WBGene00018006 | WP:CE30527 | WP:CE37904
UTGB	GTSSWE200801.07	outron	F33D11.10	F33D11.10.1	chrI	5868724	-	106	4.875	591	581	CE09901 | F33D11.10 | F33D11.10.1 | F33D11.10.2 | WBGene00018007 | WP:CE09901
UTGB	GTSSWE200802.03	outron	vpr-1	F33D11.11	chrI	5871970	-	119	7.33	2019	2012	CE09902 | F33D11.11 | F33D11.11.1 | F33D11.11.2 | WBGene00018008 | WP:CE09902 | vpr-1
UTGB	GTSSWE200803.01	outron	C34G6.5	C34G6.5	chrI	5869348	+	44	0	2840	2829	C34G6.5 | CE26909 | WBGene00016421 | WP:CE26909
UTGB	GTSSWE200805.03	outron	pgp-2	C34G6.4	chrI	5884075	+	61	1.022	2553	2541	C34G6.4 | CE41207 | WBGene00003996 | WP:CE41207 | glo-5 | pgp-2
UTGB	GTSSWE200806.04	exon	C34G6.3	C34G6.3	chrI	5895659	+	30	1.62	1232	-1	C34G6.3 | CE08575 | WBGene00016420 | WP:CE08575
UTGB	GTSSWE200807.04	outron	stam-1	C34G6.7b.1	chrI	5904397	-	66	2.028	84	66	C34G6.7 | C34G6.7a | C34G6.7b | C34G6.7b.1 | C34G6.7b.2 | C34G6.7b.3 | CE29700 | CE32816 | WBGene00004109 | WP:CE29700 | WP:CE32816 | pqn-19 | stam-1
UTGB	GTSSWE200808.02	outron	C34G6.1	C34G6.1	chrI	5904494	+	65	1.252	2220	2173	C34G6.1 | CE30431 | WBGene00016418 | WP:CE30431
UTGB	GTSSWE200809.16	exon	B0207.5	B0207.5	chrI	5918075	+	99	0.9992	2208	-1	B0207.5 | CE42464 | WBGene00015028 | WP:CE42464
UTGB	GTSSWE200810.02	outron	B0207.6	B0207.6	chrI	5937079	-	22	1.162	132	119	B0207.6 | CE30229 | WBGene00015029 | WP:CE30229
UTGB	GTSSWE200811.10	outron	air-2	B0207.4	chrI	5937223	+	249	4.638	263	256	B0207.4 | CE24761 | WBGene00000099 | WP:CE24761 | air-2 | cyk-6 | let-603 | stu-7
UTGB	GTSSWE200812.01	outron	gpa-14	B0207.3b	chrI	5941076	+	22	0	1345	1322	B0207.3 | B0207.3a | B0207.3b | CE27564 | CE38990 | WBGene00001676 | WP:CE27564 | WP:CE38990 | gpa-14
UTGB	GTSSWE200813.01	exon	Y76G2A.2	Y76G2A.2	chrI	5978645	+	15	0	340	-1	CE07957 | WBGene00022305 | WP:CE07957 | Y76G2A.2
UTGB	GTSSWE200814.07	outron	C06A5.6	C06A5.6	chrI	5986017	-	24	0	155	145	C06A5.6 | C06A5.6.1 | C06A5.6.2 | CE07953 | WBGene00015504 | WP:CE07953
UTGB	GTSSWE200815.04	outron	C06A5.3	C06A5.3a	chrI	5986453	+	204	17.24	49	41	C06A5.3 | C06A5.3a | C06A5.3a.1 | C06A5.3a.2 | C06A5.3b | CE37699 | CE37700 | WBGene00015501 | WP:CE37699 | WP:CE37700
UTGB	GTSSWE200816.03	outron	sir-2.4	C06A5.11	chrI	5990419	+	49	2.249	654	324	C06A5.11 | CE27656 | WBGene00004803 | WP:CE27656 | sir-2.4
UTGB	GTSSWE200817.07	outron	unc-94	C06A5.7a	chrI	6001102	-	38	0.8485	325	213	C06A5.7 | C06A5.7a | C06A5.7a.1 | C06A5.7a.2 | C06A5.7b | CE29023 | CE29024 | WBGene00006823 | WP:CE29023 | WP:CE29024 | tmd-1 | unc-94
UTGB	GTSSWE200818.01	outron	C06A5.12	C06A5.12	chrI	6007644	-	28	0	2718	2718	C06A5.12 | CE38678 | WBGene00044414 | WP:CE38678
UTGB	GTSSWE200819.02	outron	C06A5.8	C06A5.8a	chrI	6009626	-	15	0	105	99	C06A5.8 | C06A5.8a | C06A5.8b | C06A5.8b.1 | C06A5.8b.2 | CE07955 | CE33360 | WBGene00015505 | WP:CE07955 | WP:CE33360
UTGB	GTSSWE200820.03	outron	C06A5.1	C06A5.1	chrI	6011985	+	199	9.558	75	62	C06A5.1 | CE07948 | WBGene00015499 | WP:CE07948
UTGB	GTSSWE200823.02	outron	B0025.1a.1	B0025.1a.1	chrI	6028430	+	47	14.78	60	58	B0025.1 | B0025.1a | B0025.1a.1 | B0025.1a.2 | B0025.1b | B0025.1b.1 | B0025.1b.2 | B0025.1c | B0025.1c.1 | B0025.1c.2 | B0025.1d | B0025.1d.1 | B0025.1d.2 | B0025.1e | CE24759 | CE24760 | CE37691 | WBGene00006932 | WP:CE24759 | WP:CE24760 | WP:CE37691 | let-512 | vps-34
UTGB	GTSSWE200824.01	outron	C27A12.4	C27A12.4	chrI	6033601	+	28	0	2998	2601	C27A12.4 | CE44079 | WBGene00016155 | WP:CE44079
UTGB	GTSSWE200825.01	outron	tag-146	C27A12.3	chrI	6038258	+	17	0	175	149	C27A12.3 | CE38999 | WBGene00006492 | WP:CE38999 | tag-146
UTGB	GTSSWE200826.03	outron	C27A12.2	C27A12.2	chrI	6041661	+	19	0	15	13	C27A12.2 | CE08411 | WBGene00016154 | WP:CE08411
UTGB	GTSSWE200827.03	exon	ceh-2	C27A12.5	chrI	6050449	-	47	0.5901	59	-1	C27A12.5 | CE20530 | WBGene00000429 | WP:CE20530 | ceh-2
UTGB	GTSSWE200828.05	outron	C27A12.6	C27A12.6	chrI	6056175	-	29	0	352	351	C27A12.6 | C27A12.6.1 | C27A12.6.2 | CE08415 | WBGene00016156 | WP:CE08415
UTGB	GTSSWE200830.13	outron	ari-1	C27A12.8.1	chrI	6061060	-	45	13.22	105	104	C27A12.8 | C27A12.8.1 | C27A12.8.2 | CE29680 | WBGene00016158 | WP:CE29680 | ari-1
UTGB	GTSSWE200832.05	outron	mbd-2	C27A12.10	chrI	6063843	+	389	12.01	251	247	C27A12.10 | CE36794 | WBGene00023409 | WP:CE36794 | mbd-2
UTGB	GTSSWE200831.13	outron	C27A12.9	C27A12.9	chrI	6068726	-	87	7.384	691	683	C27A12.9 | CE36272 | WBGene00016159 | WP:CE36272
UTGB	GTSSWE200833.14	outron	ZK484.3	ZK484.3.1	chrI	6070497	-	47	0.4724	372	372	CE41970 | WBGene00022749 | WP:CE41970 | ZK484.3 | ZK484.3.1 | ZK484.3.2
UTGB	GTSSWE200835.04	outron	haf-9	ZK484.2a.1	chrI	6080698	+	79	0	1120	1116	CE27353 | CE33261 | WBGene00001819 | WP:CE27353 | WP:CE33261 | ZK484.2 | ZK484.2a | ZK484.2a.1 | ZK484.2a.2 | ZK484.2b | haf-9
UTGB	GTSSWE200836.01	exon	ZK484.5	ZK484.5	chrI	6087759	-	59	1.475	27	-1	CE15345 | WBGene00022751 | WP:CE15345 | ZK484.5
UTGB	GTSSWE200837.06	exon	ZK484.6	ZK484.6	chrI	6091084	-	35	1.617	224	-1	CE34458 | WBGene00022752 | WP:CE34458 | ZK484.6
UTGB	GTSSWE200839.01	exon	nspd-1	ZK484.8	chrI	6097836	-	13	0	42	-1	CE15351 | WBGene00022754 | WP:CE15351 | ZK484.8 | nspd-1
UTGB	GTSSWE200840.14	outron	T27A3.6	T27A3.6	chrI	6107992	-	53	3.966	274	274	CE14227 | T27A3.6 | WBGene00020842 | WP:CE14227
UTGB	GTSSWE200841.01	outron	T27A3.7	T27A3.7	chrI	6109720	-	15	0	70	62	CE14229 | T27A3.7 | WBGene00020843 | WP:CE14229
UTGB	GTSSWE200842.03	outron	T27A3.2	T27A3.2	chrI	6109857	+	32	1.428	284	279	CE30696 | T27A3.2 | WBGene00020839 | WP:CE30696
UTGB	GTSSWE200843.16	exon	T27A3.1	T27A3.1a	chrI	6122143	+	30	2.093	449	-1	CE14217 | CE30695 | CE33190 | CE33191 | CE33192 | T27A3.1 | T27A3.1a | T27A3.1b | T27A3.1c | T27A3.1d | T27A3.1d.1 | T27A3.1d.2 | T27A3.1e | WBGene00020838 | WP:CE14217 | WP:CE30695 | WP:CE33190 | WP:CE33191 | WP:CE33192
UTGB	GTSSWE200844.01	outron	pept-3	F56F4.5	chrI	6133106	+	14	0	181	141	CE11268 | F56F4.5 | WBGene00003878 | WP:CE11268 | opt-3 | pept-3
UTGB	GTSSWE200845.01	exon	F56F4.8	F56F4.8	chrI	6149238	+	1900	9.324	62	-1	CE41411 | F56F4.8 | WBGene00045498 | WP:CE41411
UTGB	GTSSWE200847.03	exon	T09B4.7	T09B4.7	chrI	6163240	-	39	0	1572	-1	CE13469 | T09B4.7 | WBGene00020381 | WP:CE13469
UTGB	GTSSWE200848.09	outron	T09B4.8	T09B4.8	chrI	6166711	-	59	2.566	177	169	CE33176 | T09B4.8 | WBGene00020382 | WP:CE33176
UTGB	GTSSWE200850.04	outron	T09B4.3	T09B4.3	chrI	6173406	+	40	0	2976	2756	CE13461 | T09B4.3 | WBGene00020377 | WP:CE13461
UTGB	GTSSWE200851.01	outron	T09B4.9	T09B4.9	chrI	6181629	-	142	3.903	786	786	CE13473 | T09B4.9 | WBGene00020383 | WP:CE13473
UTGB	GTSSWE200852.01	outron	chn-1	T09B4.10.1	chrI	6185711	-	11	0	1862	1861	1G758 | CE29991 | T09B4.10 | T09B4.10.1 | T09B4.10.2 | WBGene00000500 | WP:CE29991 | chn-1 | tag-69
UTGB	GTSSWE200853.08	outron	T09B4.2	T09B4.2	chrI	6184067	+	31	0.6648	22	14	CE13459 | T09B4.2 | T09B4.2.1 | T09B4.2.2 | WBGene00020376 | WP:CE13459
UTGB	GTSSWE200854.02	outron	T09B4.1	T09B4.1	chrI	6185375	+	32	0	90	89	CE13457 | T09B4.1 | T09B4.1.1 | T09B4.1.2 | WBGene00020375 | WP:CE13457
UTGB	GTSSWE200855.08	outron	T05E7.3	T05E7.3	chrI	6187985	+	27	7.28	189	176	CE13235 | T05E7.3 | WBGene00020259 | WP:CE13235
UTGB	GTSSWE200856.01	outron	T05E7.4	T05E7.4	chrI	6195380	-	23	0	481	480	CE39031 | T05E7.4 | WBGene00020260 | WP:CE39031
UTGB	GTSSWE200857.07	exon	vet-1	T05E7.5	chrI	6202940	-	1068	0.6414	591	-1	CE13239 | T05E7.5 | WBGene00020261 | WP:CE13239 | vet-1
UTGB	GTSSWE200858.04	exon	T05E7.1	T05E7.1	chrI	6203117	+	28	0	782	-1	CE13231 | T05E7.1 | WBGene00020258 | WP:CE13231
UTGB	GTSSWE200859.01	exon	T08B2.7	T08B2.7c	chrI	6211237	-	26	0.6173	127	-1	CE13431 | CE26950 | CE30299 | T08B2.7 | T08B2.7a | T08B2.7b | T08B2.7b.1 | T08B2.7b.2 | T08B2.7c | WBGene00020347 | WP:CE13431 | WP:CE26950 | WP:CE30299
UTGB	GTSSWE200860.01	outron	T08B2.8	T08B2.8	chrI	6211983	-	11	0	96	95	CE13433 | T08B2.8 | T08B2.8.1 | T08B2.8.2 | WBGene00020348 | WP:CE13433
UTGB	GTSSWE200861.05	outron	fars-1	T08B2.9a	chrI	6215500	-	401	1.156	922	911	CE13435 | CE33173 | T08B2.9 | T08B2.9a | T08B2.9b | T08B2.9b.1 | T08B2.9b.2 | T08B2.9b.3 | T08B2.9b.4 | WBGene00001497 | WP:CE13435 | WP:CE33173 | fars-1 | frs-1
UTGB	GTSSWE200863.01	outron	rps-17	T08B2.10.2	chrI	6220946	-	557	6.81	193	179	CE26948 | T08B2.10 | T08B2.10.1 | T08B2.10.2 | WBGene00004486 | WP:CE26948 | rps-17
UTGB	GTSSWE200864.01	exon	T08B2.11	T08B2.11	chrI	6223278	-	24	0	402	-1	CE13439 | T08B2.11 | WBGene00020349 | WP:CE13439
UTGB	GTSSWE200866.01	exon	T08B2.3	T08B2.3	chrI	6228094	+	23	0	7	-1	CE13423 | T08B2.3 | WBGene00020344 | WP:CE13423
UTGB	GTSSWE200867.01	exon	col-56	T08B2.2	chrI	6230550	+	18	0	2229	-1	CE17221 | T08B2.2 | WBGene00000633 | WP:CE17221 | col-56
UTGB	GTSSWE200868.01	exon	C48E7.7	C48E7.7	chrI	6234308	+	11	0	479	-1	C48E7.7 | CE08822 | WBGene00016752 | WP:CE08822
UTGB	GTSSWE200869.02	exon	C48E7.6	C48E7.6	chrI	6236670	+	28	0	2872	-1	C48E7.6 | CE08821 | WBGene00016751 | WP:CE08821
UTGB	GTSSWE200870.11	exon	spp-15	C48E7.10	chrI	6250069	-	2002	0.9528	24	-1	C48E7.10 | CE26915 | WBGene00005000 | WP:CE26915 | spp-15
UTGB	GTSSWE200871.05	exon	cof-2	C48E7.5	chrI	6250210	+	112	2.573	363	-1	C48E7.5 | CE36279 | WBGene00000583 | WP:CE36279 | cof-2 | col-57 | ofm-2
UTGB	GTSSWE200872.04	outron	C48E7.11	C48E7.11	chrI	6253044	+	754	2.723	42	40	C48E7.11 | CE32167 | WBGene00016754 | WP:CE32167
UTGB	GTSSWE200873.01	outron	C48E7.2	C48E7.2	chrI	6254974	+	11	0	70	63	C48E7.2 | C48E7.2.1 | C48E7.2.2 | CE08817 | WBGene00016750 | WP:CE08817
UTGB	GTSSWE200874.10	outron	C48E7.1	C48E7.1	chrI	6259375	+	293	0.7821	890	876	C48E7.1 | CE08816 | WBGene00016749 | WP:CE08816
UTGB	GTSSWE200875.01	exon	C10G11.8	C10G11.8	chrI	6274249	-	21	0	595	-1	C10G11.8 | CE27676 | WBGene00015688 | WP:CE27676
UTGB	GTSSWE200876.01	exon	C10G11.9	C10G11.9	chrI	6277802	-	17	0	2560	-1	C10G11.9 | CE08088 | WBGene00015689 | WP:CE08088
UTGB	GTSSWE200878.05	exon	C10G11.6	C10G11.6	chrI	6287665	+	191	1.01	2343	-1	C10G11.6 | C10G11.6.1 | C10G11.6.2 | CE43984 | WBGene00015686 | WP:CE43984
UTGB	GTSSWE200879.14	outron	pnk-1	C10G11.5a	chrI	6295052	+	39	0.5168	29	19	C10G11.5 | C10G11.5a | C10G11.5b | C10G11.5b.1 | C10G11.5b.2 | C10G11.5c | C10G11.5c.1 | C10G11.5c.2 | C10G11.5c.3 | CE29080 | CE30488 | CE33269 | WBGene00004068 | WP:CE29080 | WP:CE30488 | WP:CE33269 | pnk-1
UTGB	GTSSWE200880.01	exon	srh-49	C10G11.4	chrI	6297460	+	23	0	309	-1	C10G11.4 | CE08083 | WBGene00005272 | WP:CE08083 | srh-49
UTGB	GTSSWE200881.01	exon	C10G11.1	C10G11.1	chrI	6305890	+	16	0	2367	-1	C10G11.1 | CE34257 | WBGene00015685 | WP:CE34257
UTGB	GTSSWE200882.01	exon	col-58	F26B1.4	chrI	6311253	+	13	0	27	-1	CE25863 | F26B1.4 | WBGene00000634 | WP:CE25863 | col-58
UTGB	GTSSWE200883.01	outron	ima-2	F26B1.3.1	chrI	6314985	+	14	0	264	257	1G893 | CE09675 | F26B1.3 | F26B1.3.1 | F26B1.3.2 | WBGene00002073 | WP:CE09675 | ima-2
UTGB	GTSSWE200884.06	outron	F26B1.2	F26B1.2a	chrI	6317139	+	52	8.501	580	564	CE09674 | CE33057 | CE33058 | CE33059 | CE33060 | F26B1.2 | F26B1.2a | F26B1.2a.1 | F26B1.2a.2 | F26B1.2b | F26B1.2c | F26B1.2c.1 | F26B1.2c.2 | F26B1.2c.3 | F26B1.2d | F26B1.2e | WBGene00017816 | WP:CE09674 | WP:CE33057 | WP:CE33058 | WP:CE33059 | WP:CE33060
UTGB	GTSSWE200885.02	outron	let-381	F26B1.7	chrI	6324158	-	45	0	172	138	CE28006 | F26B1.7 | WBGene00002601 | WP:CE28006 | let-381
UTGB	GTSSWE200887.01	outron	mut-2	K04F10.6a	chrI	6360513	-	22	0	2115	2107	CE11740 | CE33137 | K04F10.6 | K04F10.6a | K04F10.6b | WBGene00003499 | WP:CE11740 | WP:CE33137 | mut-2 | rde-3
UTGB	GTSSWE200888.09	exon	K04F10.3	K04F10.3a	chrI	6358655	+	55	6.298	22	-1	CE40814 | CE42009 | K04F10.3 | K04F10.3a | K04F10.3b | WBGene00019396 | WP:CE40814 | WP:CE42009
UTGB	GTSSWE200889.04	outron	K04F10.2	K04F10.2	chrI	6360250	+	113	8.516	596	592	CE34333 | K04F10.2 | WBGene00019395 | WP:CE34333
UTGB	GTSSWE200890.04	exon	K04F10.1	K04F10.1	chrI	6365025	+	66	17.83	46	-1	CE41579 | K04F10.1 | WBGene00019394 | WP:CE41579
UTGB	GTSSWE200891.01	exon	K04F10.7	K04F10.7	chrI	6366383	+	2083	18.59	97	-1	CE18015 | K04F10.7 | WBGene00019399 | WP:CE18015
UTGB	GTSSWE200894.01	outron	ZC328.2	ZC328.2	chrI	6393392	-	13	0	2450	865	CE39078 | WBGene00022592 | WP:CE39078 | ZC328.2
UTGB	GTSSWE200895.05	outron	cuti-1	ZC328.1	chrI	6404054	+	204	1.572	541	535	CE27347 | WBGene00022591 | WP:CE27347 | ZC328.1 | cuti-1
UTGB	GTSSWE200896.01	exon	ZC328.5	ZC328.5	chrI	6407005	-	18	0	66	-1	CE15189 | WBGene00022594 | WP:CE15189 | ZC328.5
UTGB	GTSSWE200897.13	outron	san-1	ZC328.4	chrI	6407522	+	47	3.005	14	12	CE34445 | WBGene00004721 | WP:CE34445 | ZC328.4 | mdf-3 | san-1
UTGB	GTSSWE200898.02	exon	ZC328.3	ZC328.3a	chrI	6416830	-	38	0	201	-1	CE34444 | CE39657 | WBGene00022593 | WP:CE34444 | WP:CE39657 | ZC328.3 | ZC328.3a | ZC328.3b
UTGB	GTSSWE200899.03	exon	rbx-2	R10A10.2	chrI	6421932	-	60	1.086	80	-1	CE12670 | R10A10.2 | WBGene00019993 | WP:CE12670 | rbx-2
UTGB	GTSSWE200900.03	exon	ncbp-1	F37E3.1	chrI	6422021	+	1855	0.4007	87	-1	CE29793 | F37E3.1 | WBGene00018156 | WP:CE29793 | ncbp-1
UTGB	GTSSWE200901.05	outron	snt-4	T23H2.2	chrI	6436098	+	70	0	55	29	CE30456 | T23H2.2 | WBGene00004924 | WP:CE30456 | snt-4
UTGB	GTSSWE200902.01	outron	T23H2.3	T23H2.3	chrI	6449228	-	154	0	2761	2760	CE41936 | T23H2.3 | WBGene00020742 | WP:CE41936
UTGB	GTSSWE200903.01	outron	npp-12	T23H2.1	chrI	6447106	+	64	1.379	228	207	CE14106 | T23H2.1 | WBGene00003798 | WP:CE14106 | npp-12
UTGB	GTSSWE200904.26	exon	T23H2.4	T23H2.4	chrI	6456941	-	48	0	12	-1	CE34377 | T23H2.4 | WBGene00020743 | WP:CE34377
UTGB	GTSSWE200905.14	outron	rab-10	T23H2.5.1	chrI	6459649	-	42	0	1174	1167	CE14114 | T23H2.5 | T23H2.5.1 | T23H2.5.2 | WBGene00004273 | WP:CE14114 | gum-1 | rab-10
UTGB	GTSSWE200907.01	outron	acdh-3	K06A5.6.2	chrI	6465971	-	24	0	261	259	CE11776 | K06A5.6 | K06A5.6.1 | K06A5.6.2 | WBGene00019433 | WP:CE11776 | acdh-3
UTGB	GTSSWE200908.05	exon	K06A5.3	K06A5.3	chrI	6464228	+	18	0	2624	-1	CE11772 | K06A5.3 | WBGene00019431 | WP:CE11772
UTGB	GTSSWE200909.01	exon	K06A5.2	K06A5.2	chrI	6467721	+	27	0	463	-1	CE11770 | K06A5.2 | WBGene00019430 | WP:CE11770
UTGB	GTSSWE200910.04	outron	cdc-25.1	K06A5.7.1	chrI	6471964	-	258	4.938	59	39	CE11778 | K06A5.7 | K06A5.7.1 | K06A5.7.2 | WBGene00000386 | WP:CE11778 | cdc-25.1 | lin-60
UTGB	GTSSWE200913.01	outron	sulp-1	C55B7.6	chrI	6482037	+	20	0	416	411	C55B7.6 | CE38591 | WBGene00016945 | WP:CE38591 | sulp-1
UTGB	GTSSWE200914.01	outron	dbr-1	C55B7.8	chrI	6492795	-	28	3.368	66	65	C55B7.8 | C55B7.8.1 | C55B7.8.2 | CE30437 | Ce-dbr1 | WBGene00000937 | WP:CE30437 | dbr-1
UTGB	GTSSWE200915.07	outron	mdt-18	C55B7.9.1	chrI	6493890	-	372	10.75	56	40	C55B7.9 | C55B7.9.1 | C55B7.9.2 | CE09020 | WBGene00007018 | WP:CE09020 | mdt-18
UTGB	GTSSWE200916.04	outron	uri-1	C55B7.5	chrI	6494203	+	70	3.12	128	89	C55B7.5 | C55B7.5.1 | C55B7.5.2 | CE09016 | WBGene00016944 | WP:CE09016 | uri-1
UTGB	GTSSWE200918.02	outron	C55B7.3	C55B7.3	chrI	6499501	+	44	0	531	530	C55B7.3 | CE09014 | WBGene00016942 | WP:CE09014
UTGB	GTSSWE200919.01	outron	C55B7.2.1	C55B7.2.1	chrI	6506182	+	63	2.251	1727	1713	C55B7.2 | C55B7.2.1 | C55B7.2.2 | CE27887 | WBGene00001627 | WP:CE27887 | gly-2
UTGB	GTSSWE200920.02	outron	C55B7.11	C55B7.11	chrI	6513843	-	60	8.433	193	191	C55B7.11 | CE41882 | WBGene00016947 | WP:CE41882
UTGB	GTSSWE200921.01	exon	C55B7.1.1	C55B7.1.1	chrI	6513964	+	144	2.193	58	-1	C55B7.1 | C55B7.1.1 | C55B7.1.2 | CE09012 | WBGene00001599 | WP:CE09012 | glh-2
UTGB	GTSSWE200922.02	outron	nuo-2	T10E9.7a	chrI	6533007	-	27	0	38	28	CE33179 | CE37406 | T10E9.7 | T10E9.7a | T10E9.7b | T10E9.7b.1 | T10E9.7b.2 | WBGene00020417 | WP:CE33179 | WP:CE37406 | nduf-3 | nuo-2
UTGB	GTSSWE200923.03	exon	T10E9.3	T10E9.3	chrI	6532173	+	54	1.42	1945	-1	CE30171 | T10E9.3 | WBGene00020413 | WP:CE30171
UTGB	GTSSWE200924.04	outron	T10E9.8	T10E9.8	chrI	6541630	-	39	0.6951	573	566	CE44796 | T10E9.8 | WBGene00020418 | WP:CE44796
UTGB	GTSSWE200925.02	exon	T10E9.2	T10E9.2	chrI	6542143	+	1628	5.605	26	-1	CE13545 | T10E9.2 | WBGene00020412 | WP:CE13545
UTGB	GTSSWE200926.02	exon	T10E9.1	T10E9.1	chrI	6545004	+	69	0	107	-1	CE13543 | T10E9.1 | WBGene00020411 | WP:CE13543
UTGB	GTSSWE200927.03	outron	F57B10.8	F57B10.8	chrI	6550494	-	23	0	142	95	CE11312 | F57B10.8 | WBGene00019005 | WP:CE11312
UTGB	GTSSWE200928.07	outron	F57B10.9	F57B10.9	chrI	6552647	-	92	1.712	33	31	CE30546 | F57B10.9 | WBGene00019006 | WP:CE30546
UTGB	GTSSWE200929.01	outron	F57B10.14	F57B10.14.1	chrI	6553448	-	16	2.099	75	67	CE31352 | F57B10.14 | F57B10.14.1 | F57B10.14.2 | WBGene00019007 | WP:CE31352
UTGB	GTSSWE200930.03	outron	F57B10.10.2	F57B10.10.2	chrI	6554591	-	124	10.62	300	299	CE11316 | F57B10.10 | F57B10.10.1 | F57B10.10.2 | F57B10.10.3 | WBGene00000896 | WP:CE11316 | dad-1
UTGB	GTSSWE200931.02	exon	tre-1	F57B10.7	chrI	6554737	+	1187	18.54	165	-1	CE30545 | F57B10.7 | WBGene00006607 | WP:CE30545 | tag-36 | tre-1 | tre1
UTGB	GTSSWE200932.03	outron	xpg-1	F57B10.6	chrI	6558358	+	266	6.525	343	341	CE11308 | F57B10.6 | WBGene00019004 | WP:CE11308 | xpg-1
UTGB	GTSSWE200933.05	outron	F57B10.5	F57B10.5	chrI	6562634	+	133	0.5469	74	66	CE11306 | F57B10.5 | F57B10.5.1 | F57B10.5.2 | WBGene00019003 | WP:CE11306
UTGB	GTSSWE200934.01	outron	bag-1	F57B10.11	chrI	6564584	-	17	0	133	131	CE11318 | F57B10.11 | WBGene00000236 | WP:CE11318 | bag-1
UTGB	GTSSWE200935.01	outron	mei-2	F57B10.12	chrI	6565898	-	17	0	46	46	CE11320 | F57B10.12 | WBGene00003184 | WP:CE11320 | mei-2
UTGB	GTSSWE200936.02	outron	F57B10.4	F57B10.4	chrI	6565085	+	17	0	1089	1086	CE11304 | F57B10.4 | WBGene00019002 | WP:CE11304
UTGB	GTSSWE200937.01	exon	F57B10.3	F57B10.3a	chrI	6569213	+	10	0	397	-1	CE11302 | CE33113 | F57B10.3 | F57B10.3a | F57B10.3b | F57B10.3b.1 | F57B10.3b.2 | F57B10.3b.3 | F57B10.3b.4 | WBGene00019001 | WP:CE11302 | WP:CE33113
UTGB	GTSSWE200939.09	exon	try-6	F48A9.3	chrI	6584733	+	70	1.178	572	-1	CE41905 | F48A9.3 | WBGene00006624 | WP:CE41905 | try-6
UTGB	GTSSWE200940.01	exon	F48A9.2	F48A9.2	chrI	6589567	+	19	0	2766	-1	CE10718 | F48A9.2 | WBGene00018582 | WP:CE10718
UTGB	GTSSWE200941.01	exon	F48A9.1	F48A9.1	chrI	6594323	+	15	0	119	-1	CE10716 | F48A9.1 | WBGene00018581 | WP:CE10716
UTGB	GTSSWE200942.01	exon	D2092.6	D2092.6	chrI	6596559	+	21	0	418	-1	CE41887 | D2092.6 | WBGene00017067 | WP:CE41887
UTGB	GTSSWE200943.14	outron	D2092.5	D2092.5	chrI	6609640	-	22	0	2121	2118	CE39714 | D2092.5 | WBGene00017066 | WP:CE39714
UTGB	GTSSWE200944.01	exon	D2092.4	D2092.4	chrI	6615954	-	206	5.865	69	-1	CE30438 | D2092.4 | WBGene00017065 | WP:CE30438
UTGB	GTSSWE200945.01	exon	tsp-19	D2092.7	chrI	6616138	+	21	0	167	-1	CE40198 | D2092.7 | WBGene00006645 | WP:CE40198 | tsp-19
UTGB	GTSSWE200946.05	exon	acr-11	D2092.3	chrI	6625274	-	50	0.5574	378	-1	CE09102 | D2092.3 | WBGene00000050 | WP:CE09102 | acr-11
UTGB	GTSSWE200947.01	outron	ppfr-2	D2092.2.1	chrI	6626881	-	100	1.674	99	91	CE09101 | D2092.2 | D2092.2.1 | D2092.2.2 | WBGene00017064 | WP:CE09101 | ppfr-2
UTGB	GTSSWE200948.01	outron	ZC581.3	ZC581.3	chrI	6651153	+	19	0	119	68	CE40323 | WBGene00022633 | WP:CE40323 | ZC581.3 | ZC581.3.1 | ZC581.3.2
UTGB	GTSSWE200949.01	exon	ZC581.2	ZC581.2	chrI	6655369	+	30	0	347	-1	CE44067 | WBGene00022632 | WP:CE44067 | ZC581.2
UTGB	GTSSWE200950.03	exon	nekl-2	ZC581.1	chrI	6663119	+	44	1.002	88	-1	CE15235 | WBGene00022631 | WP:CE15235 | ZC581.1 | nekl-2 | phi-35
UTGB	GTSSWE200951.02	exon	T23B3.6	T23B3.6	chrI	6711200	-	21	0	2569	-1	CE30693 | T23B3.6 | WBGene00020714 | WP:CE30693
UTGB	GTSSWE200953.06	outron	T23B3.1	T23B3.1	chrI	6717702	+	91	0.5363	128	120	CE14008 | CE41700 | T23B3.1 | T23B3.1b | WBGene00020709 | WP:CE14008 | WP:CE41700
UTGB	GTSSWE200954.14	outron	W02D3.4	W02D3.4	chrI	6721331	-	25	0	283	275	CE14424 | W02D3.4 | W02D3.4.1 | W02D3.4.2 | WBGene00020933 | WP:CE14424
UTGB	GTSSWE200955.03	outron	mec-6	W02D3.3	chrI	6724924	+	75	1.259	244	241	CE31080 | W02D3.3 | WBGene00003170 | WP:CE31080 | mec-6
UTGB	GTSSWE200956.01	outron	W02D3.5.3	W02D3.5.3	chrI	6729571	-	20	0	203	193	CE14426 | W02D3.5 | W02D3.5.1 | W02D3.5.2 | W02D3.5.3 | WBGene00002258 | WP:CE14426 | lbp-6
UTGB	GTSSWE200957.07	outron	lbp-5	W02D3.7	chrI	6733491	-	81	3.286	1220	1219	CE14430 | W02D3.7 | WBGene00002257 | WP:CE14430 | lbp-5
UTGB	GTSSWE200958.05	outron	smg-5	W02D3.8	chrI	6738579	-	92	0.678	2425	2416	CE25134 | W02D3.8 | WBGene00004883 | WP:CE25134 | mab-15 | smg-5
UTGB	GTSSWE200959.02	outron	dhod-1	W02D3.2	chrI	6737041	+	18	0	493	440	CE14420 | W02D3.2 | W02D3.2.1 | W02D3.2.2 | WBGene00020932 | WP:CE14420 | dhod-1
UTGB	GTSSWE200960.01	outron	W02D3.1.3	W02D3.1.3	chrI	6741160	+	30	0	129	117	CE14418 | W02D3.1 | W02D3.1.1 | W02D3.1.2 | W02D3.1.3 | WBGene00020931 | WP:CE14418
UTGB	GTSSWE200961.01	outron	W02D3.12	W02D3.12	chrI	6741799	+	21	0	191	186	CE31079 | W02D3.12 | WBGene00020937 | WP:CE31079
UTGB	GTSSWE200962.14	outron	unc-37	W02D3.9.1	chrI	6745608	-	1331	3.992	282	277	CE14434 | ESG | W02D3.9 | W02D3.9.1 | W02D3.9.2 | WBGene00006773 | WP:CE14434 | let-76 | unc-37
UTGB	GTSSWE200964.06	outron	hrpf-1	W02D3.11b	chrI	6756504	-	117	2.466	156	154	CE26020 | CE31078 | W02D3.11 | W02D3.11a | W02D3.11b | W02D3.11b.1 | W02D3.11b.2 | WBGene00020936 | WP:CE26020 | WP:CE31078 | hrpf-1
UTGB	GTSSWE200965.13	outron	gpc-2	F08B6.2	chrI	6757368	+	213	11.73	401	396	CE20656 | F08B6.2 | WBGene00001682 | WP:CE20656 | gpc-2
UTGB	GTSSWE200966.09	outron	F08B6.3	F08B6.3	chrI	6760277	-	47	2.808	108	96	CE34292 | F08B6.3 | WBGene00017240 | WP:CE34292
UTGB	GTSSWE200967.05	outron	F08B6.1	F08B6.1	chrI	6760391	+	126	1.181	42	26	CE39717 | F08B6.1 | WBGene00017239 | WP:CE39717
UTGB	GTSSWE200968.04	outron	unc-87	F08B6.4b	chrI	6768419	-	35	0	627	620	CE20658 | CE27922 | CE36924 | F08B6.4 | F08B6.4a | F08B6.4b | F08B6.4b.1 | F08B6.4b.2 | F08B6.4c | F08B6.4c.1 | F08B6.4c.2 | F08B6.4c.3 | WBGene00006819 | WP:CE20658 | WP:CE27922 | WP:CE36924 | unc-87
UTGB	GTSSWE200969.05	outron	pqn-21	C37A2.5b	chrI	6779925	-	31	2.737	17	13	C37A2.5 | C37A2.5a | C37A2.5b | CE27748 | CE32818 | WBGene00004111 | WP:CE27748 | WP:CE32818 | pqn-21
UTGB	GTSSWE200971.03	exon	acdh-5	C37A2.3	chrI	6784171	+	100	8.924	738	-1	C37A2.3 | CE08612 | WBGene00016491 | WP:CE08612 | acdh-5
UTGB	GTSSWE200972.02	outron	C37A2.6	C37A2.6	chrI	6789102	-	29	0	114	98	C37A2.6 | CE40194 | WBGene00016492 | WP:CE40194
UTGB	GTSSWE200973.15	outron	C37A2.7	C37A2.7.1	chrI	6790094	-	171	2.399	356	354	C37A2.7 | C37A2.7.1 | C37A2.7.2 | CE30433 | WBGene00016493 | WP:CE30433
UTGB	GTSSWE200974.11	outron	pqn-20	C37A2.2	chrI	6790550	+	209	5.804	476	441	C37A2.2 | CE40193 | WBGene00004110 | WP:CE40193 | pqn-20
UTGB	GTSSWE200975.07	exon	C37A2.8	C37A2.8b	chrI	6799609	-	460	7.816	30	-1	C37A2.8 | C37A2.8a | C37A2.8b | CE08617 | CE29218 | WBGene00016494 | WP:CE08617 | WP:CE29218
UTGB	GTSSWE200977.01	exon	K02F2.5	K02F2.5	chrI	6810381	-	13	0	72	-1	CE31353 | K02F2.5 | WBGene00019324 | WP:CE31353
UTGB	GTSSWE200978.04	outron	teg-4	K02F2.3	chrI	6814380	+	165	0.481	149	137	CE17155 | K02F2.3 | WBGene00019323 | WP:CE17155 | phi-6 | tag-203 | teg-4
UTGB	GTSSWE200980.07	outron	ahcy-1	K02F2.2.1	chrI	6835504	+	84	0	980	964	CE17154 | CEAHH | K02F2.2 | K02F2.2.1 | K02F2.2.2 | S-adenosylhomocysteine hydrolase, AHH | WBGene00019322 | WP:CE17154 | ahcy-1
UTGB	GTSSWE200981.01	exon	dpf-3	K02F2.1b	chrI	6837935	+	76	0.5551	418	-1	CE17153 | CE28837 | K02F2.1 | K02F2.1a | K02F2.1b | WBGene00001056 | WP:CE17153 | WP:CE28837 | dpf-3
UTGB	GTSSWE200982.09	exon	dpy-14	H27M09.4	chrI	6843598	+	553	1.291	24	-1	CE25036 | H27M09.4 | WBGene00001075 | WP:CE25036 | col-59 | dpy-14
UTGB	GTSSWE200983.05	exon	H27M09.5	H27M09.5	chrI	6847302	-	132553	0.5463	350	-1	CE23827 | H27M09.5 | WBGene00019248 | WP:CE23827
UTGB	GTSSWE200984.03	outron	syp-4	H27M09.3	chrI	6847515	+	85	1.421	78	70	CE23830 | H27M09.3 | WBGene00019247 | WP:CE23830 | syp-4
UTGB	GTSSWE200985.02	outron	rpb-5	H27M09.2	chrI	6850108	+	189	4.735	315	300	CE23831 | H27M09.2 | WBGene00019246 | WP:CE23831 | rpb-5
UTGB	GTSSWE200987.05	outron	T21G5.6	T21G5.6	chrI	6868418	+	28	0	402	271	CE40311 | T21G5.6 | T21G5.6.1 | T21G5.6.2 | WBGene00044898 | WP:CE40311
UTGB	GTSSWE200988.01	outron	T21G5.4	T21G5.4	chrI	6876684	-	25	0	3000	2897	CE13894 | T21G5.4 | WBGene00020661 | WP:CE13894
UTGB	GTSSWE200990.03	exon	C48B6.4	C48B6.4	chrI	6886749	+	31	0	2504	-1	C48B6.4 | CE08806 | WBGene00016742 | WP:CE08806
UTGB	GTSSWE200991.03	exon	srb-15	C48B6.5	chrI	6901328	-	59	0	709	-1	C48B6.5 | CE38163 | WBGene00016743 | WP:CE38163 | srb-15
UTGB	GTSSWE200992.03	outron	smg-1	C48B6.6a	chrI	6914126	-	103	19.03	575	547	C48B6.6 | C48B6.6a | C48B6.6b | CE30258 | CE36919 | WBGene00004879 | WP:CE30258 | WP:CE36919 | mab-1 | smg-1
UTGB	GTSSWE200993.01	outron	C48B6.3	C48B6.3.1	chrI	6914211	+	234	16.66	847	837	C48B6.3 | C48B6.3.1 | C48B6.3.2 | CE08805 | WBGene00016741 | WP:CE08805
UTGB	GTSSWE200994.14	outron	C48B6.2	C48B6.2	chrI	6916622	+	27	0.8455	161	143	C48B6.2 | C48B6.2.1 | C48B6.2.2 | CE08804 | WBGene00016740 | WP:CE08804
UTGB	GTSSWE200995.02	exon	bbs-9	C48B6.8	chrI	6922988	-	38	1.467	33	-1	C48B6.8 | CE32166 | WBGene00016744 | WP:CE32166 | bbs-9
UTGB	GTSSWE200996.01	outron	C48B6.10	C48B6.10	chrI	6924337	-	26	0	667	658	C48B6.10 | CE27868 | WBGene00016746 | WP:CE27868
UTGB	GTSSWE200997.04	outron	C48B6.9	C48B6.9	chrI	6925630	-	41	0	171	169	C48B6.9 | CE08811 | WBGene00016745 | WP:CE08811
UTGB	GTSSWE200998.03	outron	ztf-4	T10B11.3	chrI	6924029	+	105	0.4981	2279	2234	CE34364 | T10B11.3 | WBGene00020399 | WP:CE34364 | ztf-4
UTGB	GTSSWE200999.03	outron	T10B11.2	T10B11.2	chrI	6930383	+	27	0	776	765	CE18241 | T10B11.2 | WBGene00020398 | WP:CE18241
UTGB	GTSSWE201000.05	outron	T10B11.5	T10B11.5	chrI	6943023	-	31	0	1073	1053	CE18244 | T10B11.5 | WBGene00020401 | WP:CE18244
UTGB	GTSSWE201001.04	outron	T10B11.6	T10B11.6	chrI	6946100	-	34	1.764	742	742	CE18245 | T10B11.6 | T10B11.6.1 | T10B11.6.2 | WBGene00020402 | WP:CE18245
UTGB	GTSSWE201002.02	outron	T10B11.7	T10B11.7a	chrI	6950707	-	27	0	249	208	CE43751 | CE43803 | T10B11.7 | T10B11.7a | T10B11.7a.1 | T10B11.7a.2 | T10B11.7b | WBGene00020403 | WP:CE43751 | WP:CE43803
UTGB	GTSSWE201004.01	exon	T10B11.8	T10B11.8	chrI	6954218	-	83	6.584	65	-1	CE37405 | CE43979 | T10B11.8 | T10B11.8a | T10B11.8b | WBGene00020404 | WP:CE37405 | WP:CE43979
UTGB	GTSSWE201005.01	outron	C30F12.1	C30F12.1	chrI	6963477	-	25	1.115	2338	2338	C30F12.1 | CE40689 | WBGene00016260 | WP:CE40689
UTGB	GTSSWE201006.06	outron	C30F12.2	C30F12.2.1	chrI	6970254	-	138	1.565	114	109	C30F12.2 | C30F12.2.1 | C30F12.2.2 | CE16882 | WBGene00016261 | WP:CE16882
UTGB	GTSSWE201007.01	outron	C30F12.3	C30F12.3	chrI	6972359	-	18	0	561	475	C30F12.3 | CE16883 | WBGene00016262 | WP:CE16883
UTGB	GTSSWE201008.04	exon	C30F12.4	C30F12.4	chrI	6973708	-	522	1.456	39	-1	C30F12.4 | CE16884 | WBGene00016263 | WP:CE16884
UTGB	GTSSWE201009.01	outron	C30F12.7	C30F12.7	chrI	6974515	+	11	0	246	245	C30F12.7 | CE16887 | WBGene00016266 | WP:CE16887
UTGB	GTSSWE201010.02	outron	nmur-4	C30F12.6	chrI	6986930	+	15	0	2167	2136	C30F12.6 | CE16886 | WBGene00016265 | WP:CE16886 | nmur-4
UTGB	GTSSWE201011.11	exon	C30F12.5	C30F12.5	chrI	6999634	-	497	0.3743	111	-1	C30F12.5 | C30F12.5a | C30F12.5a.1 | C30F12.5a.2 | C30F12.5b | CE44193 | CE44198 | WBGene00016264 | WP:CE44193 | WP:CE44198
UTGB	GTSSWE201012.01	exon	H06O01.4	H06O01.4	chrI	7005475	-	58	0.9033	1430	-1	H06O01.4 | WBGene00010371
UTGB	GTSSWE201014.05	outron	H06O01.2	H06O01.2	chrI	7015740	-	147	5.503	532	530	CE32454 | H06O01.2 | WBGene00010369 | WP:CE32454
UTGB	GTSSWE201015.01	outron	pdi-3	H06O01.1.1	chrI	7021410	-	558	17.79	623	620	CE11570 | H06O01.1 | H06O01.1.1 | H06O01.1.2 | H06O01.1.3 | H06O01.1.4 | WBGene00003964 | WP:CE11570 | pdi-3
UTGB	GTSSWE201016.09	outron	F15C11.2	F15C11.2a	chrI	7021584	+	107	1.182	397	397	CE09413 | CE31479 | CE31480 | F15C11.2 | F15C11.2a | F15C11.2b | F15C11.2c | WBGene00008852 | WP:CE09413 | WP:CE31479 | WP:CE31480
UTGB	GTSSWE201017.01	outron	sem-4	F15C11.1.1	chrI	7036081	+	39	0	2826	2818	CE17673 | F15C11.1 | F15C11.1.1 | F15C11.1.2 | WBGene00004773 | WP:CE17673 | sem-4
UTGB	GTSSWE201018.01	exon	W01A8.7	W01A8.7	chrI	7053771	-	23	0	1916	-1	W01A8.7 | WBGene00044764
UTGB	GTSSWE201019.02	exon	W01A8.8	W01A8.8	chrI	7054881	-	26	0	110	-1	CE40427 | W01A8.8 | WBGene00044988 | WP:CE40427
UTGB	GTSSWE201020.03	outron	W01A8.2	W01A8.2	chrI	7056402	-	53	11.76	82	44	CE40426 | W01A8.2 | W01A8.2.1 | W01A8.2.2 | W01A8.2.3 | WBGene00012164 | WP:CE40426
UTGB	GTSSWE201021.04	outron	mdt-28	W01A8.1b.2	chrI	7056500	+	60	0.4486	707	699	CE06531 | CE18303 | CE41705 | W01A8.1 | W01A8.1a | W01A8.1b | W01A8.1b.1 | W01A8.1b.2 | W01A8.1c | W01A8.1c.1 | W01A8.1c.2 | WBGene00007024 | WP:CE06531 | WP:CE18303 | WP:CE41705 | mdt-28
UTGB	GTSSWE201022.01	outron	cutl-6	W01A8.3	chrI	7065177	+	17	0	85	76	CE39963 | W01A8.3 | WBGene00012165 | WP:CE39963 | cutl-6
UTGB	GTSSWE201023.01	outron	W01A8.4.1	W01A8.4.1	chrI	7069243	-	24	14.11	68	57	CE32507 | W01A8.4 | W01A8.4.1 | W01A8.4.2 | WBGene00012166 | WP:CE32507 | nuo-6
UTGB	GTSSWE201024.02	outron	W01A8.5	W01A8.5	chrI	7069352	+	150	0	89	87	CE06535 | W01A8.5 | WBGene00012167 | WP:CE06535
UTGB	GTSSWE201025.10	exon	kin-14	F22D6.1	chrI	7080142	-	307	3.375	704	-1	CE05682 | F22D6.1 | WBGene00002198 | WP:CE05682 | kin-14
UTGB	GTSSWE201027.04	outron	nars-1	F22D6.3a.1	chrI	7090262	-	689	9.931	205	200	CE05684 | F22D6.3 | F22D6.3a | F22D6.3a.1 | F22D6.3a.2 | F22D6.3b | WBGene00003815 | WP:CE05684 | nars-1 | nrs-1
UTGB	GTSSWE201028.02	outron	nduf-6	F22D6.4.1	chrI	7089197	+	109	0	1544	1542	CE05685 | F22D6.4 | F22D6.4.1 | F22D6.4.2 | WBGene00009051 | WP:CE05685 | nduf-6
UTGB	GTSSWE201029.03	outron	prpf-4	F22D6.5	chrI	7094964	-	44	2.175	453	427	CE05686 | F22D6.5 | WBGene00004186 | WP:CE05686 | prp-4 | prpf-4
UTGB	GTSSWE201030.02	outron	ekl-1	F22D6.6	chrI	7095269	+	32	0	218	216	CE05687 | F22D6.6 | WBGene00009052 | WP:CE05687 | ekl-1
UTGB	GTSSWE201033.01	outron	gly-18	F22D6.11	chrI	7110103	+	16	3.094	136	136	CE30759 | F22D6.11 | WBGene00001643 | WP:CE30759 | gly-18
UTGB	GTSSWE201034.05	exon	K10D3.6	K10D3.6	chrI	7116705	-	351	1.237	50	-1	CE29596 | K10D3.6 | WBGene00010740 | WP:CE29596
UTGB	GTSSWE201035.04	exon	glr-3	K10D3.1	chrI	7116966	+	29	0	841	-1	CE36553 | K10D3.1 | WBGene00001614 | WP:CE36553 | glr-3
UTGB	GTSSWE201037.02	exon	taf-11.2	K10D3.3	chrI	7131165	+	32	0	1332	-1	CE06172 | K10D3.3 | WBGene00006394 | WP:CE06172 | taf-11.2
UTGB	GTSSWE201038.18	exon	K10D3.4	K10D3.4	chrI	7139899	-	2990	0.9729	228	-1	CE06173 | K10D3.4 | WBGene00010738 | WP:CE06173
UTGB	GTSSWE201040.16	outron	K07G5.6	K07G5.6.1	chrI	7152743	-	92	0.8559	929	902	CE26899 | K07G5.6 | K07G5.6.1 | K07G5.6.2 | WBGene00010645 | WP:CE26899
UTGB	GTSSWE201041.04	outron	crml-1	K07G5.1	chrI	7159012	-	60	0.6594	2293	2227	CE06129 | K07G5.1 | WBGene00010641 | WP:CE06129 | crml-1
UTGB	GTSSWE201042.04	outron	xpa-1	K07G5.2	chrI	7158204	+	47	1.402	1519	1515	CE06130 | K07G5.2 | WBGene00006963 | WP:CE06130 | rad-3 | xpa-1
UTGB	GTSSWE201043.01	outron	K07G5.3	K07G5.3	chrI	7160992	+	27	2.618	22	21	CE06131 | K07G5.3 | WBGene00010642 | WP:CE06131
UTGB	GTSSWE201044.01	exon	K07G5.4	K07G5.4	chrI	7168809	-	16	0	126	-1	CE06132 | K07G5.4 | WBGene00010643 | WP:CE06132
UTGB	GTSSWE201045.01	outron	K07G5.5	K07G5.5	chrI	7170001	+	22	0	23	22	CE06133 | K07G5.5 | WBGene00010644 | WP:CE06133
UTGB	GTSSWE201046.04	outron	M05B5.2	M05B5.2	chrI	7176752	-	125	1.184	2637	2629	CE31044 | M05B5.2 | M05B5.2.1 | M05B5.2.2 | WBGene00010870 | WP:CE31044
UTGB	GTSSWE201047.02	outron	trpa-2	M05B5.6	chrI	7181345	+	20	0	1715	1706	CE18081 | M05B5.6 | WBGene00010873 | WP:CE18081 | trpa-2
UTGB	GTSSWE201048.03	exon	M05B5.3	M05B5.3	chrI	7185700	+	32	0	925	-1	CE28625 | M05B5.3 | M05B5.3.1 | M05B5.3.2 | WBGene00010871 | WP:CE28625
UTGB	GTSSWE201049.05	exon	M05B5.4	M05B5.4	chrI	7188527	+	346	0.4188	10	-1	CE06190 | M05B5.4 | WBGene00010872 | WP:CE06190
UTGB	GTSSWE201050.21	outron	hlh-2	M05B5.5a	chrI	7194845	-	117	1.003	939	932	CE06191 | M05B5.5 | M05B5.5a | M05B5.5b | WBGene00001949 | WP:CE06191 | hlh-2
UTGB	GTSSWE201051.01	exon	col-61	C01H6.1	chrI	7204315	-	13	0	808	-1	C01H6.1 | CE05184 | WBGene00000637 | WP:CE05184 | col-61
UTGB	GTSSWE201052.02	exon	C01H6.2	C01H6.2	chrI	7207644	-	35	18.23	58	-1	C01H6.2 | CE36466 | WBGene00007252 | WP:CE36466
UTGB	GTSSWE201053.08	exon	C01H6.3	C01H6.3	chrI	7209768	-	196	2.279	83	-1	C01H6.3 | CE05186 | WBGene00007253 | WP:CE05186
UTGB	GTSSWE201054.04	outron	C01H6.4	C01H6.4	chrI	7210541	+	55	1.425	50	47	C01H6.4 | CE42054 | WBGene00007254 | WP:CE42054
UTGB	GTSSWE201055.01	exon	nhr-23	C01H6.5c	chrI	7214945	+	95	1.377	20	-1	C01H6.5 | C01H6.5a | C01H6.5b | C01H6.5c | C01H6.5d | C01H6.5e | C01H6.5f | CE24775 | CE30478 | CE37806 | CE39084 | CE39085 | CE39086 | WBGene00003622 | WP:CE24775 | WP:CE30478 | WP:CE37806 | WP:CE39084 | WP:CE39085 | WP:CE39086 | chr3 | cnr-3 | nhr-23
UTGB	GTSSWE201056.09	outron	C01H6.6	C01H6.6	chrI	7221176	+	111	15.88	1288	1120	C01H6.6 | C01H6.6.1 | C01H6.6.2 | CE34153 | WBGene00007255 | WP:CE34153
UTGB	GTSSWE201057.02	outron	tag-298	C01H6.7	chrI	7224773	+	1313	3.462	59	45	C01H6.7 | C01H6.7a | C01H6.7a.1 | C01H6.7a.2 | C01H6.7b | CE05190 | CE40891 | WBGene00007256 | WP:CE05190 | WP:CE40891 | tag-298
UTGB	GTSSWE201058.05	exon	C01H6.8	C01H6.8a	chrI	7227879	+	67	7.617	39	-1	C01H6.8 | C01H6.8a | C01H6.8b | CE40892 | CE40893 | WBGene00007257 | WP:CE40892 | WP:CE40893
UTGB	GTSSWE201059.08	outron	C01H6.9	C01H6.9	chrI	7233186	-	101	0	67	66	C01H6.9 | CE42869 | WBGene00007258 | WP:CE42869
UTGB	GTSSWE201062.02	outron	dhp-1	R06C7.3.1	chrI	7243874	-	33	2.291	122	112	CE30293 | CeCRMP/DHP-1 | R06C7.3 | R06C7.3.1 | R06C7.3.2 | R06C7.3.3 | WBGene00000963 | WP:CE30293 | dhp-1
UTGB	GTSSWE201064.02	outron	R06C7.5	R06C7.5a	chrI	7248888	-	24	1.911	213	202	CE06248 | CE32476 | R06C7.5 | R06C7.5a | R06C7.5b | R06C7.5b.1 | R06C7.5b.2 | WBGene00011064 | WP:CE06248 | WP:CE32476
UTGB	GTSSWE201065.01	outron	lin-61	R06C7.7a.1	chrI	7253098	-	458	0	2283	2283	CE31573 | CE37542 | R06C7.7 | R06C7.7a | R06C7.7a.1 | R06C7.7a.2 | R06C7.7b | WBGene00003041 | WP:CE31573 | WP:CE37542 | lin-61 | rls-1
UTGB	GTSSWE201066.04	outron	bub-1	R06C7.8	chrI	7251796	+	65	2.459	149	143	CE06251 | R06C7.8 | WBGene00000275 | WP:CE06251 | bub-1
UTGB	GTSSWE201067.01	outron	ztf-15	R06C7.9b	chrI	7255192	+	23	0.61	333	317	CE32477 | CE42219 | R06C7.9 | R06C7.9a | R06C7.9a.1 | R06C7.9a.2 | R06C7.9b | WBGene00011066 | WP:CE32477 | WP:CE42219 | ztf-15
UTGB	GTSSWE201068.05	exon	let-75	R06C7.10.1	chrI	7267072	-	139	0.3989	138	-1	CE06253 | R06C7.10 | R06C7.10.1 | R06C7.10.2 | WBGene00002348 | WP:CE06253 | let-75 | myo-1 | myosin I
UTGB	GTSSWE201069.01	exon	tyr-3	F21C3.2	chrI	7278566	-	33	2.291	41	-1	CE42097 | F21C3.2 | WBGene00009001 | WP:CE42097 | tyr-3
UTGB	GTSSWE201071.03	outron	rde-2	F21C3.4a	chrI	7282978	-	32	0	108	108	CE37005 | CE38174 | F21C3.4 | F21C3.4a | F21C3.4a.1 | F21C3.4a.2 | F21C3.4b | WBGene00004324 | WP:CE37005 | WP:CE38174 | mut-8 | rde-2
UTGB	GTSSWE201072.06	exon	pfd-6	F21C3.5	chrI	7283784	-	1177	1.568	45	-1	CE05680 | F21C3.5 | WBGene00009004 | WP:CE05680 | pfd-6
UTGB	GTSSWE201073.01	exon	F13G3.12	F13G3.12	chrI	7295758	+	59	4.223	25	-1	CE34806 | F13G3.12 | WBGene00008770 | WP:CE34806
UTGB	GTSSWE201074.01	exon	F13G3.3	F13G3.3	chrI	7300324	-	83	10.17	363	-1	CE27124 | CE42750 | F13G3.3 | F13G3.3a | F13G3.3b | F13G3.3b.1 | F13G3.3b.2 | WBGene00008763 | WP:CE27124 | WP:CE42750
UTGB	GTSSWE201075.02	outron	dylt-1	F13G3.4.1	chrI	7300975	-	17	0	82	63	CE17659 | F13G3.4 | F13G3.4.1 | F13G3.4.2 | WBGene00008764 | WP:CE17659 | dylt-1
UTGB	GTSSWE201076.02	outron	ttx-7	F13G3.5b.1	chrI	7303293	-	24	0	325	325	CE41115 | CE41116 | F13G3.5 | F13G3.5a | F13G3.5b | F13G3.5b.1 | F13G3.5b.2 | WBGene00008765 | WP:CE41115 | WP:CE41116 | ttx-7
UTGB	GTSSWE201077.03	outron	F13G3.6	F13G3.6	chrI	7304777	-	89	5.998	91	88	CE42640 | F13G3.6 | WBGene00008766 | WP:CE42640
UTGB	GTSSWE201079.02	outron	F13G3.11	F13G3.11	chrI	7306717	+	60	0.5283	398	398	CE28913 | F13G3.11 | F13G3.11.1 | F13G3.11.2 | WBGene00008769 | WP:CE28913
UTGB	GTSSWE201080.01	outron	eat-5	F13G3.8.1	chrI	7312153	-	15	0	420	249	CE05620 | F13G3.8 | F13G3.8.1 | F13G3.8.2 | WBGene00001136 | WP:CE05620 | eat-5
UTGB	GTSSWE201081.01	outron	mif-3	F13G3.9	chrI	7313621	-	33	0.728	98	97	CE09371 | F13G3.9 | WBGene00003236 | WP:CE09371 | mif-3
UTGB	GTSSWE201082.04	outron	F13G3.10	F13G3.10c	chrI	7314392	-	100	8.143	620	494	CE17660 | CE42530 | CE42541 | F13G3.10 | F13G3.10b | F13G3.10c | F13G3.10c.1 | F13G3.10c.2 | WBGene00008768 | WP:CE17660 | WP:CE42530 | WP:CE42541
UTGB	GTSSWE201083.20	outron	F52A8.1	F52A8.1.1	chrI	7315921	+	57	0	1725	1723	CE05908 | F52A8.1 | F52A8.1.1 | F52A8.1.2 | WBGene00009915 | WP:CE05908
UTGB	GTSSWE201085.01	exon	F52A8.3	F52A8.3a	chrI	7323652	-	20	0	63	-1	CE05910 | CE37019 | F52A8.3 | F52A8.3a | F52A8.3b | WBGene00009916 | WP:CE05910 | WP:CE37019
UTGB	GTSSWE201086.04	exon	glb-18	F52A8.4	chrI	7342823	+	56	4.109	77	-1	CE05911 | CE42769 | F52A8.4 | F52A8.4a | F52A8.4b | WBGene00009917 | WP:CE05911 | WP:CE42769 | glb-18
UTGB	GTSSWE201087.07	outron	F52A8.5	F52A8.5.1	chrI	7347363	-	166	0.4561	643	641	CE05912 | F52A8.5 | F52A8.5.1 | F52A8.5.2 | WBGene00009918 | WP:CE05912
UTGB	GTSSWE201088.01	outron	F52A8.6	F52A8.6a	chrI	7345700	+	33	0	1662	1510	CE20840 | CE28028 | CE28936 | F52A8.6 | F52A8.6a | F52A8.6b | F52A8.6c | F52A8.6c.1 | F52A8.6c.2 | F52A8.6c.3 | WBGene00009919 | WP:CE20840 | WP:CE28028 | WP:CE28936
UTGB	GTSSWE201089.04	outron	inx-14	F07A5.1b	chrI	7352103	-	68	1.815	31	18	CE05554 | CE17632 | F07A5.1 | F07A5.1a | F07A5.1b | WBGene00002136 | WP:CE05554 | WP:CE17632 | inx-14 | opu-14
UTGB	GTSSWE201090.02	exon	F07A5.2	F07A5.2	chrI	7350071	+	63	1.33	2434	-1	CE05555 | F07A5.2 | WBGene00008541 | WP:CE05555
UTGB	GTSSWE201091.01	outron	scav-6	F07A5.3	chrI	7354408	+	360	13.09	84	81	CE05556 | F07A5.3 | WBGene00008542 | WP:CE05556 | scav-6
UTGB	GTSSWE201093.01	exon	F07A5.7.1	F07A5.7.1	chrI	7383153	-	72	3.016	72	-1	CE09197 | CE42754 | F07A5.7 | F07A5.7.1 | F07A5.7.2 | F07A5.7.3 | F07A5.7a | F07A5.7b | F07A5.7b.1 | F07A5.7b.2 | F07A5.7b.3 | F07A5.7b.4 | WBGene00006754 | WP:CE09197 | WP:CE42754 | unc-15
UTGB	GTSSWE201094.01	exon	sol-1	C15A11.3	chrI	7395883	-	42	0.6109	2	-1	C15A11.3 | CE36685 | WBGene00004944 | WP:CE36685 | sol-1
UTGB	GTSSWE201095.01	exon	C15A11.4	C15A11.4	chrI	7400987	-	20	0	192	-1	C15A11.4 | CE08172 | WBGene00007598 | WP:CE08172
UTGB	GTSSWE201096.01	exon	C15A11.7	C15A11.7a	chrI	7405033	+	12	0	4	-1	C15A11.7 | C15A11.7a | C15A11.7b | CE08175 | WBGene00007599 | WP:CE08175
UTGB	GTSSWE201097.02	outron	unc-13	ZK524.2e	chrI	7420022	+	19	0	2759	2642	CE15371 | CE34624 | CE34625 | CE34626 | CE43866 | WBGene00006752 | WP:CE15371 | WP:CE34624 | WP:CE34625 | WP:CE34626 | WP:CE43866 | ZK524.2 | ZK524.2a | ZK524.2c | ZK524.2d | ZK524.2e | ZK524.2f | unc-13
UTGB	GTSSWE201098.01	exon	spe-4	ZK524.1	chrI	7453738	+	15	0	972	-1	CE06618 | WBGene00004958 | WP:CE06618 | ZK524.1 | spe-4
UTGB	GTSSWE201099.14	outron	lars-2	ZK524.3b	chrI	7461078	-	35	5.443	421	325	CE35160 | CE35161 | CE42742 | WBGene00003074 | WP:CE35160 | WP:CE35161 | WP:CE42742 | ZK524.3 | ZK524.3a | ZK524.3b | ZK524.3b.1 | ZK524.3b.2 | ZK524.3c | lars-2 | lrs-2
UTGB	GTSSWE201100.01	outron	ZK524.4	ZK524.4	chrI	7466743	-	27	0	325	324	CE18454 | WBGene00013994 | WP:CE18454 | ZK524.4
UTGB	GTSSWE201101.23	outron	T28F4.1	T28F4.1.2	chrI	7475058	-	126	1.455	868	860	CE06523 | T28F4.1 | T28F4.1.1 | T28F4.1.2 | T28F4.1.3 | WBGene00012136 | WP:CE06523
UTGB	GTSSWE201102.05	exon	asic-2	T28F4.2	chrI	7479545	+	21	0	586	-1	CE06524 | T28F4.2 | WBGene00012137 | WP:CE06524 | asic-2
UTGB	GTSSWE201103.02	exon	T28F4.3	T28F4.3	chrI	7486586	-	24	0	549	-1	CE06525 | T28F4.3 | WBGene00012138 | WP:CE06525
UTGB	GTSSWE201104.01	outron	T28F4.4	T28F4.4	chrI	7492682	-	27	0	2518	2512	CE06526 | T28F4.4 | WBGene00012139 | WP:CE06526
UTGB	GTSSWE201106.07	outron	T28F4.6	T28F4.6	chrI	7494229	-	395	1.321	23	20	CE37559 | T28F4.6 | WBGene00012141 | WP:CE37559
UTGB	GTSSWE201107.01	outron	pbrm-1	C26C6.1a	chrI	7492774	+	45	19.07	2664	2659	C26C6.1 | C26C6.1a | C26C6.1b | C26C6.1b.1 | C26C6.1b.2 | C26C6.1b.3 | CE30254 | CE38280 | WBGene00007042 | WP:CE30254 | WP:CE38280 | pbrm-1 | tag-185
UTGB	GTSSWE201108.02	exon	C26C6.8	C26C6.8	chrI	7506957	-	21	0	1380	-1	C26C6.8 | CE39135 | WBGene00007742 | WP:CE39135
UTGB	GTSSWE201109.01	exon	C26C6.6	C26C6.6	chrI	7503233	+	122	1.163	2735	-1	C26C6.6 | CE05315 | WBGene00007740 | WP:CE05315
UTGB	GTSSWE201110.01	exon	glb-8	C26C6.7	chrI	7508020	+	50	0	697	-1	C26C6.7 | C26C6.7a | C26C6.7b | CE40742 | CE42712 | WBGene00007741 | WP:CE40742 | WP:CE42712 | glb-8
UTGB	GTSSWE201111.22	exon	C26C6.9	C26C6.9	chrI	7515087	-	173	1.644	21	-1	C26C6.9 | CE34710 | WBGene00007743 | WP:CE34710
UTGB	GTSSWE201112.44	outron	goa-1	C26C6.2	chrI	7521026	+	70	1.612	1180	1086	C26C6.2 | C26C6.2.1 | C26C6.2.2 | CE05311 | WBGene00001648 | WP:CE05311 | goa-1
UTGB	GTSSWE201113.22	exon	nas-36	C26C6.3	chrI	7526384	+	53	7.418	919	-1	C26C6.3 | CE38281 | WBGene00003552 | WP:CE38281 | nas-36
UTGB	GTSSWE201114.03	exon	C26C6.4	C26C6.4a	chrI	7532273	+	45	0.5184	38	-1	C26C6.4 | C26C6.4a | C26C6.4b | CE43149 | CE43251 | WBGene00007739 | WP:CE43149 | WP:CE43251
UTGB	GTSSWE201116.01	outron	T25G3.1	T25G3.1	chrI	7552669	+	10	0	1185	1176	CE34378 | T25G3.1 | T25G3.1.1 | T25G3.1.2 | WBGene00012029 | WP:CE34378
UTGB	GTSSWE201118.03	outron	T25G3.3	T25G3.3.1	chrI	7559715	+	24	0	124	119	CE30306 | T25G3.3 | T25G3.3.1 | T25G3.3.2 | WBGene00012030 | WP:CE30306
UTGB	GTSSWE201119.21	outron	T25G3.4	T25G3.4	chrI	7564336	+	43	0	245	243	CE14180 | T25G3.4 | T25G3.4.1 | T25G3.4.2 | WBGene00012031 | WP:CE14180
UTGB	GTSSWE201121.12	outron	D2030.2	D2030.2a.1	chrI	7574210	+	83	2.246	64	61	CE09079 | CE35176 | D2030.2 | D2030.2a | D2030.2a.1 | D2030.2a.2 | D2030.2a.3 | D2030.2b | D2030.2b.1 | D2030.2b.2 | D2030.2b.3 | D2030.2b.4 | D2030.2b.5 | D2030.2b.6 | D2030.2b.7 | WBGene00008412 | WP:CE09079 | WP:CE35176
UTGB	GTSSWE201122.04	outron	D2030.4	D2030.4.1	chrI	7581848	-	58	0.6004	229	224	CE09081 | D2030.4 | D2030.4.1 | D2030.4.2 | WBGene00008414 | WP:CE09081
UTGB	GTSSWE201123.02	outron	mce-1	D2030.5	chrI	7581939	+	101	2.796	177	162	CE09082 | D2030.5 | D2030.5.1 | D2030.5.2 | WBGene00008415 | WP:CE09082 | mce-1
UTGB	GTSSWE201124.07	exon	D2030.12	D2030.12	chrI	7583930	+	66	1.754	69	-1	CE34784 | D2030.12 | WBGene00008421 | WP:CE34784
UTGB	GTSSWE201125.05	outron	prg-1	D2030.6.1	chrI	7588546	-	26	3.275	189	183	CE09083 | D2030.6 | D2030.6.1 | D2030.6.2 | WBGene00004178 | WP:CE09083 | prg-1
UTGB	GTSSWE201126.04	exon	D2030.7	D2030.7	chrI	7588655	+	491	8.126	62	-1	CE30270 | D2030.7 | WBGene00008417 | WP:CE30270
UTGB	GTSSWE201127.03	outron	D2030.11	D2030.11	chrI	7590634	+	65	1.091	29	29	CE30926 | D2030.11 | WBGene00008420 | WP:CE30926
UTGB	GTSSWE201128.01	outron	D2030.8	D2030.8	chrI	7591224	+	10	0	70	70	CE41212 | D2030.8 | D2030.8.1 | D2030.8.2 | WBGene00008418 | WP:CE41212
UTGB	GTSSWE201129.02	outron	wdr-23	D2030.9a	chrI	7594815	+	30	1.784	1706	1687	CE09086 | CE23620 | CE43863 | D2030.9 | D2030.9a | D2030.9b | D2030.9c | D2030.9c.1 | D2030.9c.2 | WBGene00008419 | WP:CE09086 | WP:CE23620 | WP:CE43863 | wdr-23 | xrep-1
UTGB	GTSSWE201130.01	exon	aex-1	D2030.10b	chrI	7601900	+	30	5.296	419	-1	CE30740 | CE30741 | D2030.10 | D2030.10a | D2030.10a.1 | D2030.10a.2 | D2030.10b | WBGene00000084 | WP:CE30740 | WP:CE30741 | aex-1
UTGB	GTSSWE201132.02	outron	capg-1	F29D11.2	chrI	7640013	-	43	13.94	254	239	CE09790 | F29D11.2 | WBGene00009254 | WP:CE09790 | capg-1
UTGB	GTSSWE201133.03	outron	F26A3.1	F26A3.1	chrI	7642422	-	34	0.8493	725	659	CE20724 | F26A3.1 | F26A3.1.1 | F26A3.1.2 | F26A3.1.3 | WBGene00009140 | WP:CE20724
UTGB	GTSSWE201135.04	outron	rrf-1	F26A3.8	chrI	7649997	-	23	3.386	234	224	CE27141 | F26A3.8 | WBGene00004508 | WP:CE27141 | rrf-1
UTGB	GTSSWE201137.06	outron	F26A3.4	F26A3.4.1	chrI	7658394	-	27	0	119	107	CE09669 | F26A3.4 | F26A3.4.1 | F26A3.4.2 | WBGene00009142 | WP:CE09669
UTGB	GTSSWE201138.05	exon	del-3	F26A3.6	chrI	7672763	-	330	5.74	54	-1	CE09671 | F26A3.6 | WBGene00009144 | WP:CE09671 | del-3
UTGB	GTSSWE201139.05	outron	F26A3.7	F26A3.7	chrI	7676238	-	156	0.5137	122	120	CE09672 | F26A3.7 | WBGene00009145 | WP:CE09672
UTGB	GTSSWE201140.02	outron	T24B1.1	T24B1.1	chrI	7675275	+	98	1.736	1402	1388	CE27210 | T24B1.1 | WBGene00011975 | WP:CE27210
UTGB	GTSSWE201141.02	outron	T23G11.7	T23G11.7b	chrI	7678801	+	53	0	650	648	CE16459 | CE41267 | T23G11.7 | T23G11.7a | T23G11.7a.1 | T23G11.7a.2 | T23G11.7b | T23G11.7b.1 | T23G11.7b.2 | WBGene00011972 | WP:CE16459 | WP:CE41267
UTGB	GTSSWE201142.01	outron	rlbp-1	T23G11.5	chrI	7682841	+	22	0	504	495	CE45360 | CE45406 | T23G11.5 | T23G11.5a | T23G11.5a.1 | T23G11.5a.2 | T23G11.5b | T23G11.5b.1 | T23G11.5b.2 | T23G11.5b.3 | WBGene00011970 | WP:CE45360 | WP:CE45406 | rlbp-1
UTGB	GTSSWE201143.11	outron	T23G11.6	T23G11.6b	chrI	7689576	-	49	0	234	223	CE14102 | CE38226 | CE41025 | T23G11.6 | T23G11.6a | T23G11.6b | T23G11.6c | T23G11.6d | WBGene00011971 | WP:CE14102 | WP:CE38226 | WP:CE41025
UTGB	GTSSWE201144.03	outron	T23G11.4	T23G11.4	chrI	7693802	+	126	4.812	535	521	CE14098 | T23G11.4 | WBGene00011969 | WP:CE14098
UTGB	GTSSWE201145.01	outron	gld-1	T23G11.3	chrI	7695221	+	10	0	470	455	CE14096 | T23G11.3 | T23G11.3.1 | T23G11.3.2 | WBGene00001595 | WP:CE14096 | gld-1
UTGB	GTSSWE201146.25	exon	T23G11.10	T23G11.10	chrI	7697895	+	317	13.74	401	-1	CE42173 | T23G11.10 | WBGene00011973 | WP:CE42173
UTGB	GTSSWE201148.07	exon	T23G11.1	T23G11.1	chrI	7702067	-	35	0	102	-1	CE14092 | T23G11.1 | WBGene00011968 | WP:CE14092
UTGB	GTSSWE201149.02	outron	F27D4.1	F27D4.1	chrI	7701116	+	235	0.7702	1313	1308	CE24926 | F27D4.1 | F27D4.1.1 | F27D4.1.2 | WBGene00009187 | WP:CE24926
UTGB	GTSSWE201151.02	outron	F27D4.7	F27D4.7	chrI	7724718	-	544	9.669	68	66	CE34829 | F27D4.7 | WBGene00009191 | WP:CE34829
UTGB	GTSSWE201152.09	outron	F27D4.4	F27D4.4a.1	chrI	7724821	+	88	1.073	203	193	CE40046 | CE41229 | F27D4.4 | F27D4.4a | F27D4.4a.1 | F27D4.4a.2 | F27D4.4b | WBGene00009189 | WP:CE40046 | WP:CE41229
UTGB	GTSSWE201153.03	outron	tag-173	F27D4.5	chrI	7726907	+	22	0	355	355	CE05736 | F27D4.5 | F27D4.5.1 | F27D4.5.2 | WBGene00006518 | WP:CE05736 | tag-173
UTGB	GTSSWE201154.05	outron	F27D4.8	F27D4.8	chrI	7728877	+	35	0	320	302	CE42104 | F27D4.8 | WBGene00077543 | WP:CE42104
UTGB	GTSSWE201155.01	outron	F27D4.6	F27D4.6a.1	chrI	7730999	+	124	19.45	186	171	CE32394 | CE41895 | F27D4.6 | F27D4.6a | F27D4.6a.1 | F27D4.6a.2 | F27D4.6a.3 | F27D4.6b | WBGene00009190 | WP:CE32394 | WP:CE41895
UTGB	GTSSWE201156.05	outron	F58H10.1	F58H10.1	chrI	7755746	+	50	0	31	14	CE36173 | F58H10.1 | WBGene00010291 | WP:CE36173
UTGB	GTSSWE201157.10	exon	nsf-1	H15N14.2a	chrI	7772449	-	244	1.647	246	-1	CE15513 | CE19925 | H15N14.2 | H15N14.2a | H15N14.2b | H15N14.2b.1 | H15N14.2b.2 | H15N14.2b.3 | WBGene00003818 | WP:CE15513 | WP:CE19925 | nsf-1
UTGB	GTSSWE201159.06	exon	D2005.1	D2005.1	chrI	7786159	-	25	4.555	540	-1	CE09065 | D2005.1 | WBGene00008397 | WP:CE09065
UTGB	GTSSWE201161.04	outron	D2005.4	D2005.4.1	chrI	7814966	+	51	0	296	276	CE42818 | D2005.4 | D2005.4.1 | D2005.4.2 | WBGene00008399 | WP:CE42818
UTGB	GTSSWE201162.14	outron	drh-3	D2005.5	chrI	7820748	+	181	1.512	89	77	CE36120 | D2005.5 | WBGene00008400 | WP:CE36120 | drh-3 | ekl-3
UTGB	GTSSWE201163.01	exon	glna-3	F30F8.2	chrI	7832892	-	10	0	1371	-1	CE28553 | F30F8.2 | WBGene00009271 | WP:CE28553 | glna-3
UTGB	GTSSWE201164.01	exon	F30F8.1	F30F8.1	chrI	7835416	-	189	11.82	80	-1	CE09813 | F30F8.1 | WBGene00009270 | WP:CE09813
UTGB	GTSSWE201165.04	outron	F30F8.3	F30F8.3	chrI	7835710	+	106	0.5802	111	98	CE27147 | F30F8.3 | F30F8.3.1 | F30F8.3.2 | WBGene00009272 | WP:CE27147
UTGB	GTSSWE201166.04	outron	F30F8.9	F30F8.9a	chrI	7836781	+	91	2.434	277	277	CE27148 | CE32398 | F30F8.9 | F30F8.9a | F30F8.9b | F30F8.9b.1 | F30F8.9b.2 | WBGene00009276 | WP:CE27148 | WP:CE32398
UTGB	GTSSWE201167.02	outron	F30F8.10	F30F8.10a	chrI	7839771	+	27	0	704	665	CE41233 | CE41234 | F30F8.10 | F30F8.10a | F30F8.10b | WBGene00009277 | WP:CE41233 | WP:CE41234
UTGB	GTSSWE201169.14	outron	taf-5	F30F8.8.1	chrI	7849055	+	63	1.021	764	752	CE39361 | F30F8.8 | F30F8.8.1 | F30F8.8.2 | F30F8.8.3 | WBGene00006386 | WP:CE39361 | taf-5
UTGB	GTSSWE201170.14	outron	nud-2	R11A5.2	chrI	7861535	-	120	0.4085	2137	2123	CE12724 | R11A5.2 | WBGene00011230 | WP:CE12724 | nud-2
UTGB	GTSSWE201173.01	outron	R11A5.7	R11A5.7.1	chrI	7875580	-	33	0	69	31	CE32478 | R11A5.7 | R11A5.7.1 | R11A5.7.2 | WBGene00011235 | WP:CE32478
UTGB	GTSSWE201174.02	outron	F55D12.1	F55D12.1	chrI	7884004	+	98	18.33	342	332	CE05955 | F55D12.1 | WBGene00010110 | WP:CE05955
UTGB	GTSSWE201175.08	outron	F55D12.2	F55D12.2	chrI	7889412	+	218	1.706	139	103	CE32439 | CE43569 | F55D12.2 | F55D12.2a | F55D12.2b | WBGene00010111 | WP:CE32439 | WP:CE43569
UTGB	GTSSWE201176.01	exon	nhr-191	F55D12.3	chrI	7894930	+	12	0	1189	-1	F55D12.3 | WBGene00010112 | nhr-191
UTGB	GTSSWE201177.01	exon	unc-55	F55D12.4b	chrI	7905327	-	19	0	1549	-1	CE43454 | CE43459 | F55D12.4 | F55D12.4a | F55D12.4b | WBGene00006790 | WP:CE43454 | WP:CE43459 | unc-55
UTGB	GTSSWE201178.01	outron	F20G4.2	F20G4.2	chrI	7918632	-	48	5.67	298	296	CE36387 | CE42471 | F20G4.2 | F55D12.5 | F55D12.5.1 | F55D12.5.2 | WBGene00008991 | WBGene00010113 | WP:CE36387 | WP:CE42471
UTGB	GTSSWE201179.01	outron	smgl-1	F20G4.1	chrI	7927045	-	320	6.97	713	712	CE34296 | F20G4.1 | WBGene00008990 | WP:CE34296 | smgl-1
UTGB	GTSSWE201180.04	outron	F20G4.3.1	F20G4.3.1	chrI	7935783	-	200	0	1245	1211	CE27133 | F20G4.3 | F20G4.3.1 | F20G4.3.2 | WBGene00003777 | WP:CE27133 | nmy-2
UTGB	GTSSWE201181.02	outron	T22C1.1	T22C1.1.1	chrI	7936188	+	115	0	72	70	CE36611 | T22C1.1 | T22C1.1.1 | T22C1.1.2 | WBGene00011912 | WP:CE36611
UTGB	GTSSWE201182.14	outron	T22C1.3	T22C1.3	chrI	7938068	+	58	17.8	498	486	CE39412 | T22C1.3 | WBGene00011914 | WP:CE39412
UTGB	GTSSWE201183.11	exon	T22C1.4	T22C1.4	chrI	7940742	-	136	0.4972	50	-1	CE41266 | T22C1.4 | WBGene00011915 | WP:CE41266
UTGB	GTSSWE201184.03	outron	T22C1.5	T22C1.5	chrI	7940817	+	56	6.503	242	94	CE42696 | T22C1.5 | WBGene00011916 | WP:CE42696
UTGB	GTSSWE201185.11	outron	T22C1.6	T22C1.6	chrI	7942874	+	138	3.876	61	42	CE24002 | T22C1.6 | WBGene00011917 | WP:CE24002
UTGB	GTSSWE201186.07	outron	jph-1	T22C1.7	chrI	7952442	-	73	15.73	903	854	CE30566 | JP | T22C1.7 | WBGene00002179 | WP:CE30566 | jph-1
UTGB	GTSSWE201187.01	exon	T22C1.12	T22C1.12	chrI	7962291	-	20	0	836	-1	CE35022 | T22C1.12 | WBGene00011921 | WP:CE35022
UTGB	GTSSWE201188.02	outron	rbg-2	T22C1.10a	chrI	7961958	+	14	2.548	101	90	CE06498 | CE36203 | T22C1.10 | T22C1.10a | T22C1.10b | WBGene00004318 | WP:CE06498 | WP:CE36203 | rbg-2
UTGB	GTSSWE201189.06	outron	T22C1.11	T22C1.11	chrI	7969333	-	164	6.499	657	651	CE24001 | T22C1.11 | WBGene00011920 | WP:CE24001
UTGB	GTSSWE201190.01	exon	H05L14.2	H05L14.2	chrI	7980670	+	10	0	918	-1	CE42798 | H05L14.2 | WBGene00010367 | WP:CE42798
UTGB	GTSSWE201191.02	outron	C54G4.5	C54G4.5	chrI	7992873	+	15	0	2897	2861	C54G4.5 | CE23613 | WBGene00008315 | WP:CE23613
UTGB	GTSSWE201192.01	outron	rskn-2	C54G4.1a	chrI	8012295	+	32	0	2167	2111	C54G4.1 | C54G4.1a | C54G4.1b | CE32338 | CE40030 | WBGene00008311 | WP:CE32338 | WP:CE40030 | rskn-2
UTGB	GTSSWE201194.01	exon	dod-18	C54G4.6	chrI	8023213	-	32	15.61	2351	-1	C54G4.6 | CE42082 | WBGene00008316 | WP:CE42082 | dod-18
UTGB	GTSSWE201195.01	outron	cyc-1	C54G4.8.1	chrI	8024667	-	29	0	269	250	C54G4.8 | C54G4.8.1 | C54G4.8.2 | CE05514 | WBGene00000869 | WP:CE05514 | cyc-1
UTGB	GTSSWE201196.02	outron	C54G4.9	C54G4.9	chrI	8026724	-	22	0	210	204	C54G4.9 | CE05515 | WBGene00008318 | WP:CE05515
UTGB	GTSSWE201197.11	outron	iftb-1	K04G2.1.1	chrI	8027964	-	171	0.9379	207	177	CE16227 | K04G2.1 | K04G2.1.1 | K04G2.1.2 | K04G2.1.3 | WBGene00010560 | WP:CE16227 | iftb-1 | phi-17
UTGB	GTSSWE201199.03	outron	cdc-48.3	K04G2.3	chrI	8037141	-	41	0	1450	1450	CE06097 | K04G2.3 | WBGene00010562 | WP:CE06097 | cdc-48.3
UTGB	GTSSWE201200.05	outron	ath-1	K04G2.5	chrI	8039796	-	37	0	962	891	CE27390 | K04G2.5 | K04G2.5.1 | K04G2.5.2 | WBGene00010564 | WP:CE27390 | ath-1
UTGB	GTSSWE201202.03	outron	K04G2.6	K04G2.6.1	chrI	8040679	+	25	2.463	115	114	CE06100 | K04G2.6 | K04G2.6.1 | K04G2.6.2 | WBGene00010565 | WP:CE06100
UTGB	GTSSWE201203.02	exon	K04G2.7	K04G2.7a	chrI	8049345	-	23	0	19	-1	CE38203 | CE42485 | K04G2.7 | K04G2.7a | K04G2.7b | WBGene00010566 | WP:CE38203 | WP:CE42485
UTGB	GTSSWE201204.26	outron	2013-04-01	K04G2.8b	chrI	8048730	+	58	2.048	1307	1307	CE06102 | CE18016 | K04G2.8 | K04G2.8a | K04G2.8b | WBGene00000156 | WP:CE06102 | WP:CE18016 | apr-1
UTGB	GTSSWE201205.09	outron	K04G2.9	K04G2.9	chrI	8057790	-	60	0.6006	768	766	CE06103 | K04G2.9 | WBGene00010567 | WP:CE06103
UTGB	GTSSWE201206.09	exon	K04G2.10	K04G2.10	chrI	8055251	+	220	8.802	2505	-1	CE06104 | K04G2.10 | WBGene00010568 | WP:CE06104
UTGB	GTSSWE201207.03	outron	che-3	F18C12.1	chrI	8082390	-	20	0	724	718	CE32386 | F18C12.1 | WBGene00000485 | WP:CE32386 | avr-1 | caf-2 | che-3 | che-8 | osm-2
UTGB	GTSSWE201209.10	outron	F18C12.3	F18C12.3	chrI	8095390	+	37	10.58	344	344	CE15869 | F18C12.3 | WBGene00008934 | WP:CE15869
UTGB	GTSSWE201210.12	outron	spr-4	C09H6.1b	chrI	8101832	+	59	2.25	1768	1763	C09H6.1 | C09H6.1a | C09H6.1b | CE15609 | CE30487 | WBGene00005009 | WP:CE15609 | WP:CE30487 | spr-4
UTGB	GTSSWE201211.03	outron	lin-10	C09H6.2b	chrI	8121381	-	39	0	2073	2072	C09H6.2 | C09H6.2a | C09H6.2b | C09H6.2c | CE15610 | CE27060 | CE42752 | WBGene00002999 | WP:CE15610 | WP:CE27060 | WP:CE42752 | lin-10
UTGB	GTSSWE201212.01	outron	mau-2	C09H6.3	chrI	8124587	+	21	0	1214	1208	C09H6.3 | C09H6.3.1 | C09H6.3.2 | CE15611 | WBGene00003136 | WP:CE15611 | mau-2
UTGB	GTSSWE201215.01	exon	H31B20.2	H31B20.2	chrI	8170968	+	15	0	1746	-1	CE36872 | H31B20.2 | WBGene00023413 | WP:CE36872
UTGB	GTSSWE201217.05	outron	gla-3	T02E1.3a	chrI	8214352	+	35	0	51	23	CE18170 | CE18171 | CE32481 | T02E1.3 | T02E1.3a | T02E1.3b | T02E1.3c | WBGene00011376 | WP:CE18170 | WP:CE18171 | WP:CE32481 | gla-3
UTGB	GTSSWE201216.09	outron	dhs-3	T02E1.5b	chrI	8218439	-	41	2.504	158	121	CE41004 | CE41005 | CE41006 | T02E1.5 | T02E1.5a | T02E1.5b | T02E1.5c | T02E1.5c.1 | T02E1.5c.2 | WBGene00000967 | WP:CE41004 | WP:CE41005 | WP:CE41006 | dhs-3
UTGB	GTSSWE201218.02	outron	T02E1.2	T02E1.2	chrI	8223045	-	128	19.03	50	42	CE32480 | T02E1.2 | WBGene00011375 | WP:CE32480
UTGB	GTSSWE201219.04	outron	T02E1.8	T02E1.8	chrI	8233313	+	25	4.318	2427	2427	CE34981 | T02E1.8 | WBGene00011380 | WP:CE34981
UTGB	GTSSWE201220.01	exon	ZK265.3	ZK265.3	chrI	8241561	+	13	0	572	-1	CE15293 | WBGene00013956 | WP:CE15293 | ZK265.3
UTGB	GTSSWE201221.04	exon	col-63	ZK265.2	chrI	8245615	-	16670	0.4852	673	-1	CE15291 | WBGene00000639 | WP:CE15291 | ZK265.2 | col-63
UTGB	GTSSWE201222.05	exon	ceh-8	ZK265.4	chrI	8250914	-	286	0.5168	24	-1	CE38130 | WBGene00000433 | WP:CE38130 | ZK265.4 | ceh-8
UTGB	GTSSWE201223.02	outron	ZK265.9	ZK265.9	chrI	8255583	-	222	3.779	669	663	CE38132 | WBGene00044094 | WP:CE38132 | ZK265.9
UTGB	GTSSWE201224.01	outron	ZK265.6	ZK265.6	chrI	8255250	+	63	0	96	91	CE15299 | WBGene00013958 | WP:CE15299 | ZK265.6
UTGB	GTSSWE201225.02	exon	sre-23	ZK265.5	chrI	8259564	-	65	1.989	631	-1	CE38131 | WBGene00013957 | WP:CE38131 | ZK265.5 | sre-23
UTGB	GTSSWE201226.04	outron	ZK265.7	ZK265.7	chrI	8261969	+	43	0	63	63	CE32551 | WBGene00013959 | WP:CE32551 | ZK265.7
UTGB	GTSSWE201227.10	exon	cutl-8	ZK265.8	chrI	8270307	+	66	0.7797	167	-1	CE42720 | WBGene00013960 | WP:CE42720 | ZK265.8 | cutl-8
UTGB	GTSSWE201229.09	exon	T01G9.3	T01G9.3	chrI	8281984	+	921	1.14	74	-1	CE06340 | T01G9.3 | WBGene00011345 | WP:CE06340
UTGB	GTSSWE201228.01	outron	T01G9.2	T01G9.2b.1	chrI	8289175	-	72	12.28	1074	1058	CE23937 | CE27202 | ORF1 | T01G9.2 | T01G9.2a | T01G9.2b | T01G9.2b.1 | T01G9.2b.2 | WBGene00011344 | WP:CE23937 | WP:CE27202
UTGB	GTSSWE201230.08	outron	kin-10	T01G9.6a.1	chrI	8291123	-	184	13.8	316	125	CE06343 | CE18168 | T01G9.6 | T01G9.6a | T01G9.6a.1 | T01G9.6a.2 | T01G9.6b | T01G9.6b.1 | T01G9.6b.2 | T01G9.6b.3 | WBGene00002196 | WP:CE06343 | WP:CE18168 | kin-10 | kin-5
UTGB	GTSSWE201231.05	outron	npp-2	T01G9.4	chrI	8293987	-	73	5.414	354	354	CE06341 | T01G9.4 | T01G9.4.1 | T01G9.4.2 | WBGene00003788 | WP:CE06341 | kup-2 | npp-2
UTGB	GTSSWE201232.01	outron	mei-1	T01G9.5b	chrI	8294067	+	118	10.52	807	806	CE06342 | CE32479 | T01G9.5 | T01G9.5a | T01G9.5a.1 | T01G9.5a.2 | T01G9.5b | WBGene00003183 | WP:CE06342 | WP:CE32479 | mei-1
UTGB	GTSSWE201234.12	exon	F52B5.7	F52B5.7	chrI	8315333	-	860	1.515	22	-1	CE34874 | F52B5.7 | WBGene00009923 | WP:CE34874
UTGB	GTSSWE201235.01	outron	F52B5.2	F52B5.2	chrI	8318522	-	14	0.6969	279	279	CE24993 | F52B5.2 | F52B5.2.1 | F52B5.2.2 | WBGene00009921 | WP:CE24993
UTGB	GTSSWE201236.05	outron	F52B5.3	F52B5.3	chrI	8324047	-	70	1.597	71	67	CE05718 | F52B5.3 | WBGene00009922 | WP:CE05718
UTGB	GTSSWE201237.01	outron	cep-1	F52B5.5a.1	chrI	8323465	+	22	0	828	822	CE29805 | CE38369 | F52B5.5 | F52B5.5a | F52B5.5a.1 | F52B5.5a.2 | F52B5.5b | F52B5.5b.1 | F52B5.5b.2 | WBGene00000467 | WP:CE29805 | WP:CE38369 | cep-1
UTGB	GTSSWE201238.03	outron	rpl-25.2	F52B5.6.1	chrI	8329738	-	86	1.127	100	98	CE05721 | F52B5.6 | F52B5.6.1 | F52B5.6.2 | F52B5.6.3 | F52B5.6.4 | WBGene00004439 | WP:CE05721 | rpl-25.2
UTGB	GTSSWE201239.04	exon	C34B7.1	C34B7.1	chrI	8330493	+	33	1.294	113	-1	C34B7.1 | CE27817 | WBGene00007911 | WP:CE27817
UTGB	GTSSWE201240.07	exon	mys-4	C34B7.4	chrI	8333146	+	3052	4.326	44	-1	C34B7.4 | CE27818 | WBGene00007914 | WP:CE27818 | mys-4
UTGB	GTSSWE201241.02	outron	C34B7.2	C34B7.2	chrI	8336542	+	30	13.96	432	416	C34B7.2 | CE32316 | WBGene00007912 | WP:CE32316
UTGB	GTSSWE201242.01	outron	tba-5	F16D3.1	chrI	8351592	+	20	0	1811	1789	CE09434 | F16D3.1 | WBGene00006531 | WP:CE09434 | tba-5
UTGB	GTSSWE201243.07	outron	rsd-6	F16D3.2.1	chrI	8364114	-	22	0	279	265	CE32384 | F16D3.2 | F16D3.2.1 | F16D3.2.2 | F16D3.2.3 | WBGene00004684 | WP:CE32384 | rsd-6
UTGB	GTSSWE201244.08	exon	T19A6.1	T19A6.1b	chrI	8392724	-	137	18.88	133	-1	CE41261 | CE41262 | CE41263 | T19A6.1 | T19A6.1a | T19A6.1a.1 | T19A6.1a.2 | T19A6.1b | T19A6.1c | WBGene00011827 | WP:CE41261 | WP:CE41262 | WP:CE41263
UTGB	GTSSWE201245.06	outron	ngp-1	T19A6.2a	chrI	8393290	+	41	0	1452	1431	CE32493 | CE32494 | CE38417 | T19A6.2 | T19A6.2a | T19A6.2b | T19A6.2b.1 | T19A6.2b.2 | T19A6.2b.3 | T19A6.2b.4 | T19A6.2c | WBGene00003596 | WP:CE32493 | WP:CE32494 | WP:CE38417 | ngp-1
UTGB	GTSSWE201248.07	outron	F02E9.3	F02E9.3	chrI	8407997	-	71	3.257	2048	2026	CE34291 | F02E9.3 | WBGene00008529 | WP:CE34291
UTGB	GTSSWE201250.02	outron	lin-28	F02E9.2a	chrI	8412880	-	35	0.7992	2083	2082	CE24879 | CE24880 | F02E9.2 | F02E9.2a | F02E9.2b | WBGene00003014 | WP:CE24879 | WP:CE24880 | lin-28
UTGB	GTSSWE201251.09	outron	F02E9.7	F02E9.7	chrI	8413005	+	77	1.195	280	243	CE09190 | F02E9.7 | WBGene00008531 | WP:CE09190
UTGB	GTSSWE201252.01	outron	sin-3	F02E9.4b	chrI	8416379	+	16	0.714	446	445	CE33046 | CE40934 | F02E9.4 | F02E9.4a | F02E9.4b | WBGene00004117 | WP:CE33046 | WP:CE40934 | pqn-28 | sin-3
UTGB	GTSSWE201253.01	outron	F02E9.5	F02E9.5b.1	chrI	8426859	-	52	2.971	1085	1079	CE41214 | CE41215 | F02E9.5 | F02E9.5a | F02E9.5b | F02E9.5b.1 | F02E9.5b.2 | WBGene00008530 | WP:CE41214 | WP:CE41215
UTGB	GTSSWE201254.03	outron	F02E9.10	F02E9.10c.1	chrI	8429896	-	74	1.096	89	81	CE27119 | CE38314 | CE41213 | F02E9.10 | F02E9.10a | F02E9.10a.1 | F02E9.10a.2 | F02E9.10b | F02E9.10b.1 | F02E9.10b.2 | F02E9.10c | F02E9.10c.1 | F02E9.10c.2 | WBGene00008533 | WP:CE27119 | WP:CE38314 | WP:CE41213
UTGB	GTSSWE201255.06	outron	sod-2	F10D11.1.2	chrI	8434499	+	82	14.13	50	44	CE09323 | F10D11.1 | F10D11.1.1 | F10D11.1.2 | WBGene00004931 | WP:CE09323 | sdm-1 | sod-2
UTGB	GTSSWE201256.04	outron	F10D11.2	F10D11.2	chrI	8438624	-	2442	2.898	44	33	CE32366 | F10D11.2 | WBGene00008648 | WP:CE32366
UTGB	GTSSWE201257.03	outron	F10D11.6	F10D11.6	chrI	8452133	-	26	0	1145	1118	CE23640 | F10D11.6 | WBGene00008652 | WP:CE23640
UTGB	GTSSWE201258.23	outron	unc-120	D1081.2	chrI	8459119	+	424	0.8287	1102	1099	CE05534 | D1081.2 | WBGene00006844 | WP:CE05534 | unc-120
UTGB	GTSSWE201260.01	outron	D1081.9	D1081.9	chrI	8487372	-	45	19.5	335	322	CE23619 | D1081.9 | WBGene00008387 | WP:CE23619
UTGB	GTSSWE201261.04	outron	D1081.7	D1081.7b	chrI	8487496	+	146	0.9721	140	115	CE05539 | CE41211 | D1081.7 | D1081.7a | D1081.7b | WBGene00008385 | WP:CE05539 | WP:CE41211
UTGB	GTSSWE201262.05	outron	D1081.8	D1081.8	chrI	8491022	+	154	0.8176	277	262	CE05540 | D1081.8 | D1081.8.1 | D1081.8.2 | WBGene00008386 | WP:CE05540 | phi-7
UTGB	GTSSWE201264.05	outron	sec-12	K02B12.3.1	chrI	8511331	-	34	0	22	22	CE32461 | K02B12.3 | K02B12.3.1 | K02B12.3.2 | WBGene00010496 | WP:CE32461 | phi-15 | sec-12
UTGB	GTSSWE201265.13	exon	K02B12.2	K02B12.2	chrI	8512411	-	958	5.722	66	-1	CE06063 | K02B12.2 | WBGene00010495 | WP:CE06063
UTGB	GTSSWE201266.02	outron	axl-1	K02B12.4b	chrI	8511883	+	14	0	2029	2012	CE40260 | CE40261 | K02B12.4 | K02B12.4a | K02B12.4b | WBGene00010497 | WP:CE40260 | WP:CE40261 | axl-1
UTGB	GTSSWE201267.04	outron	K02B12.5	K02B12.5	chrI	8526932	-	43	0.5855	317	317	CE39383 | K02B12.5 | K02B12.5.1 | K02B12.5.2 | WBGene00010498 | WP:CE39383
UTGB	GTSSWE201268.01	outron	K02B12.7	K02B12.7	chrI	8529462	-	30	0	197	197	CE11618 | K02B12.7 | K02B12.7.1 | K02B12.7.2 | WBGene00010500 | WP:CE11618
UTGB	GTSSWE201269.02	outron	zhp-3	K02B12.8	chrI	8531553	-	25	1.749	239	223	CE34201 | CE43850 | K02B12.8 | K02B12.8a | K02B12.8b | WBGene00006976 | WP:CE34201 | WP:CE43850 | zhp-3
UTGB	GTSSWE201270.02	exon	M04C7.3	M04C7.3	chrI	8549525	-	14	0	2806	-1	CE12398 | M04C7.3 | WBGene00010854 | WP:CE12398
UTGB	GTSSWE201271.08	outron	T01H8.2	T01H8.2	chrI	8574010	-	34	18.36	269	267	CE13016 | T01H8.2 | WBGene00011353 | WP:CE13016
UTGB	GTSSWE201272.01	outron	rskn-1	T01H8.1e	chrI	8583020	-	20	0	2925	2919	CE34493 | CE34494 | CE34495 | CE38217 | CE41000 | T01H8.1 | T01H8.1a | T01H8.1b | T01H8.1c | T01H8.1d | T01H8.1d.1 | T01H8.1d.2 | T01H8.1e | WBGene00011352 | WP:CE34493 | WP:CE34494 | WP:CE34495 | WP:CE38217 | WP:CE41000 | rskn-1
UTGB	GTSSWE201274.02	outron	ran-4	R05D11.3.1	chrI	8590809	+	557	18.92	401	399	CE06238 | R05D11.3 | R05D11.3.1 | R05D11.3.2 | WBGene00004305 | WP:CE06238 | ran-4
UTGB	GTSSWE201275.02	outron	R05D11.5	R05D11.5	chrI	8591977	+	31	0	108	108	CE27195 | R05D11.5 | R05D11.5.1 | R05D11.5.2 | WBGene00011033 | WP:CE27195
UTGB	GTSSWE201276.01	outron	R05D11.9	R05D11.9	chrI	8592942	+	18	1.349	80	78	CE32474 | R05D11.9 | WBGene00011037 | WP:CE32474
UTGB	GTSSWE201277.02	outron	R05D11.6	R05D11.6	chrI	8596249	+	86	1.44	82	77	CE32473 | R05D11.6 | R05D11.6.1 | R05D11.6.2 | WBGene00011034 | WP:CE32473
UTGB	GTSSWE201278.06	outron	R05D11.7	R05D11.7	chrI	8601053	+	19	0.8826	310	300	CE06242 | R05D11.7 | WBGene00011035 | WP:CE06242
UTGB	GTSSWE201281.01	outron	F43G9.1	F43G9.1.1	chrI	8608785	-	71	0	168	167	CE34018 | F43G9.1 | F43G9.1.1 | F43G9.1.2 | WBGene00009664 | WP:CE34018
UTGB	GTSSWE201282.04	outron	F43G9.2	F43G9.2a	chrI	8608937	+	40	13.75	987	983	CE40959 | CE40960 | F43G9.2 | F43G9.2a | F43G9.2b | WBGene00009665 | WP:CE40959 | WP:CE40960
UTGB	GTSSWE201284.05	outron	F43G9.3	F43G9.3	chrI	8615155	-	82	0.5953	399	329	CE10358 | F43G9.3 | WBGene00009666 | WP:CE10358
UTGB	GTSSWE201285.08	outron	cfim-1	F43G9.5	chrI	8615274	+	125	3.611	112	107	CE10362 | F43G9.5 | WBGene00009668 | WP:CE10362 | cfim-1
UTGB	GTSSWE201286.03	exon	fer-1	F43G9.6a	chrI	8631905	-	20	0	727	-1	CE10364 | CE42470 | F43G9.6 | F43G9.6a | F43G9.6b | F43G9.6b.1 | F43G9.6b.2 | WBGene00001414 | WP:CE10364 | WP:CE42470 | fer-1
UTGB	GTSSWE201287.04	exon	ces-1	F43G9.11	chrI	8633928	+	993	4.691	14	-1	CE17821 | F43G9.11 | WBGene00000468 | WP:CE17821 | ces-1
UTGB	GTSSWE201288.02	outron	cpn-1	F43G9.9.2	chrI	8637941	-	27	0	824	821	CE10370 | F43G9.9 | F43G9.9.1 | F43G9.9.2 | WBGene00000777 | WP:CE10370 | cpn-1
UTGB	GTSSWE201289.01	outron	mfap-1	F43G9.10	chrI	8640345	-	17	0	116	115	CE10372 | F43G9.10 | WBGene00009671 | WP:CE10372 | mfap-1
UTGB	GTSSWE201290.02	outron	F43G9.12	F43G9.12	chrI	8640444	+	15	5.321	76	75	CE17822 | F43G9.12 | WBGene00009672 | WP:CE17822
UTGB	GTSSWE201291.02	outron	syx-17	VF39H2L.1	chrI	8644359	+	23	1.55	133	94	CE18300 | VF39H2L.1 | WBGene00012150 | WP:CE18300 | syx-17
UTGB	GTSSWE201292.01	outron	sig-7	F39H2.2a	chrI	8646150	+	28	0	294	294	CE32410 | CE32411 | F39H2.2 | F39H2.2a | F39H2.2b | F39H2.2b.1 | F39H2.2b.2 | WBGene00000890 | WP:CE32410 | WP:CE32411 | cyn-14 | cyp-14 | sig-7
UTGB	GTSSWE201293.02	outron	mrt-1	F39H2.5.1	chrI	8659844	+	26	0	986	980	CE30531 | F39H2.5 | F39H2.5.1 | F39H2.5.2 | WBGene00045237 | WP:CE30531 | mrt-1
UTGB	GTSSWE201294.02	outron	syp-3	F39H2.4	chrI	8664452	-	79	0	344	338	CE41238 | F39H2.4 | WBGene00006377 | WP:CE41238 | syp-3
UTGB	GTSSWE201295.01	outron	F39H2.3	F39H2.3.1	chrI	8664933	+	198	14.84	36	36	CE37516 | F39H2.3 | F39H2.3.1 | F39H2.3.2 | WBGene00009563 | WP:CE37516
UTGB	GTSSWE201298.04	exon	hot-5	K07A12.6	chrI	8687098	-	74	0	14	-1	CE11874 | K07A12.6 | WBGene00001990 | WP:CE11874 | hot-5
UTGB	GTSSWE201299.02	outron	K07A12.4	K07A12.4b	chrI	8691005	-	23	0	82	82	CE39388 | CE39389 | K07A12.4 | K07A12.4a | K07A12.4a.1 | K07A12.4a.2 | K07A12.4b | WBGene00010622 | WP:CE39388 | WP:CE39389
UTGB	GTSSWE201300.01	outron	K07A12.7	K07A12.7	chrI	8693426	-	41	0	941	941	CE25935 | K07A12.7 | WBGene00010624 | WP:CE25935
UTGB	GTSSWE201301.04	outron	asg-1	K07A12.3.1	chrI	8692677	+	60	1.398	264	262	CE11868 | K07A12.3 | K07A12.3.1 | K07A12.3.2 | WBGene00000209 | WP:CE11868 | asg-1
UTGB	GTSSWE201302.01	outron	K07A12.5	K07A12.5	chrI	8695328	-	13	0	350	255	CE38204 | K07A12.5 | WBGene00010623 | WP:CE38204
UTGB	GTSSWE201303.29	outron	pbs-7	F39H11.5.1	chrI	8696375	-	128	0.8788	89	82	CE20761 | F39H11.5 | F39H11.5.1 | F39H11.5.2 | WBGene00003953 | WP:CE20761 | pbs-7
UTGB	GTSSWE201304.03	outron	F39H11.1	F39H11.1	chrI	8696450	+	72	0.5405	150	146	CE27158 | F39H11.1 | F39H11.1.1 | F39H11.1.2 | WBGene00009565 | WP:CE27158
UTGB	GTSSWE201305.01	outron	tlf-1	F39H11.2a	chrI	8702398	-	287	7.881	447	433	CE27159 | CE42480 | F39H11.2 | F39H11.2a | F39H11.2b | WBGene00006577 | WP:CE27159 | WP:CE42480 | tlf-1
UTGB	GTSSWE201308.02	outron	pas-4	C36B1.4.1	chrI	8728544	-	687	4.957	63	63	C36B1.4 | C36B1.4.1 | C36B1.4.2 | CE05371 | WBGene00003925 | WP:CE05371 | pas-4
UTGB	GTSSWE201309.04	outron	rpb-3	C36B1.3	chrI	8728712	+	140	17.53	50	48	C36B1.3 | CE39091 | WBGene00007971 | WP:CE39091 | rpb-3
UTGB	GTSSWE201310.02	outron	C36B1.14	C36B1.14	chrI	8730076	+	39	2.629	76	73	C36B1.14 | CE39090 | WBGene00044614 | WP:CE39090
UTGB	GTSSWE201311.02	exon	C36B1.13	C36B1.13	chrI	8731686	-	18	0	69	-1	C36B1.13 | CE38155 | WBGene00044120 | WP:CE38155
UTGB	GTSSWE201312.04	outron	prp-4	C36B1.5.1	chrI	8735920	-	36	0.7557	219	209	C36B1.5 | C36B1.5.1 | C36B1.5.2 | CE05372 | WBGene00007972 | WP:CE05372 | prp-4
UTGB	GTSSWE201313.02	outron	dhfr-1	C36B1.7	chrI	8735990	+	26	7.105	225	216	C36B1.7 | CE05374 | WBGene00007974 | WP:CE05374 | dhfr-1
UTGB	GTSSWE201314.01	exon	gls-1	C36B1.8b	chrI	8737019	+	11	0	46	-1	C36B1.8 | C36B1.8a | C36B1.8b | C36B1.8c | CE34472 | CE34473 | CE43936 | WBGene00007975 | WP:CE34472 | WP:CE34473 | WP:CE43936 | gls-1
UTGB	GTSSWE201316.01	exon	gska-3	C36B1.10	chrI	8753514	-	138	1.39	2223	-1	C36B1.10 | CE05377 | WBGene00007977 | WP:CE05377 | gska-3
UTGB	GTSSWE201317.12	outron	imp-1	C36B1.12b	chrI	8751673	+	56	8.071	569	556	C36B1.12 | C36B1.12a | C36B1.12a.1 | C36B1.12a.2 | C36B1.12b | C36B1.12c | C36B1.12c.1 | C36B1.12c.2 | CE05379 | CE38290 | CE38291 | WBGene00007979 | WP:CE05379 | WP:CE38290 | WP:CE38291 | imp-1
UTGB	GTSSWE201319.04	outron	DY3.8	DY3.8	chrI	8759057	-	52	0	68	67	CE36431 | DY3.8 | DY3.8.1 | DY3.8.2 | WBGene00008440 | WP:CE36431
UTGB	GTSSWE201320.11	outron	tin-13	DY3.1	chrI	8759861	-	52	4.579	88	79	CE15745 | DY3.1 | WBGene00006574 | WP:CE15745 | tim-13 | tim13 | tin-13
UTGB	GTSSWE201321.16	outron	lmn-1	DY3.2.1	chrI	8761677	+	297	3.175	1372	1357	CE15746 | DY3.2 | DY3.2.1 | DY3.2.2 | Lam1 | WBGene00003052 | WP:CE15746 | lmn-1
UTGB	GTSSWE201322.07	exon	hlh-16	DY3.3	chrI	8768084	-	165	2.057	84	-1	CE43245 | DY3.3 | WBGene00001960 | WP:CE43245 | hlh-16
UTGB	GTSSWE201323.11	outron	trt-1	DY3.4a.1	chrI	8768234	+	41	1.462	280	280	CE15748 | CE27901 | DY3.4 | DY3.4a | DY3.4a.1 | DY3.4a.2 | DY3.4b | DY3.4b.1 | DY3.4b.2 | DY3.4b.3 | DY3.4b.4 | DY3.4b.5 | WBGene00006618 | WP:CE15748 | WP:CE27901 | trt-1
UTGB	GTSSWE201324.10	exon	pqn-26	DY3.5	chrI	8779922	-	32	1.423	2131	-1	CE43131 | DY3.5 | WBGene00004115 | WP:CE43131 | pqn-26
UTGB	GTSSWE201325.09	outron	mfb-1	DY3.6	chrI	8785460	-	59	2.123	80	51	CE15750 | DY3.6 | WBGene00008439 | WP:CE15750 | mfb-1 | tag-220
UTGB	GTSSWE201326.07	outron	sup-17	DY3.7	chrI	8792516	+	86	0.7225	575	563	CE15751 | DY3.7 | DY3.7.1 | DY3.7.2 | WBGene00006324 | WP:CE15751 | sup-17
UTGB	GTSSWE201328.14	outron	F36A2.2	F36A2.2	chrI	8804981	-	46	2.009	291	290	CE09942 | F36A2.2 | WBGene00009452 | WP:CE09942
UTGB	GTSSWE201330.02	outron	phip-1	F36A2.8	chrI	8808446	+	28	14.29	423	409	CE32406 | F36A2.8 | WBGene00009455 | WP:CE32406 | phip-1
UTGB	GTSSWE201331.02	exon	twk-30	F36A2.4	chrI	8813393	-	13	0	1737	-1	CE42822 | F36A2.4 | WBGene00006682 | WP:CE42822 | twk-30
UTGB	GTSSWE201332.01	outron	F36A2.7	F36A2.7.1	chrI	8813515	+	36	17.39	240	239	CE09946 | F36A2.7 | F36A2.7.1 | F36A2.7.2 | F36A2.7.3 | F36A2.7.4 | WBGene00009454 | WP:CE09946
UTGB	GTSSWE201333.03	outron	rps-15	F36A2.6.2	chrI	8816492	-	61	0	313	305	CE09945 | F36A2.6 | F36A2.6.1 | F36A2.6.2 | WBGene00004484 | WP:CE09945 | rps-15
UTGB	GTSSWE201334.02	outron	F36A2.9	F36A2.9b	chrI	8814914	+	17	0	2060	2059	CE32407 | CE32408 | F36A2.9 | F36A2.9a | F36A2.9b | WBGene00009456 | WP:CE32407 | WP:CE32408
UTGB	GTSSWE201335.01	exon	F36A2.11	F36A2.11	chrI	8821008	+	107	13.23	1273	-1	CE34181 | F36A2.11 | WBGene00009458 | WP:CE34181
UTGB	GTSSWE201336.01	exon	F36A2.14	F36A2.14	chrI	8825610	-	27	0	142	-1	CE37233 | F36A2.14 | WBGene00023490 | WP:CE37233
UTGB	GTSSWE201337.08	exon	F36A2.12	F36A2.12	chrI	8828210	-	90	9.604	1640	-1	CE37232 | F36A2.12 | WBGene00009459 | WP:CE37232
UTGB	GTSSWE201339.01	exon	F29D10.1	F29D10.1	chrI	8838146	+	178	0	2480	-1	CE05760 | F29D10.1 | WBGene00009250 | WP:CE05760
UTGB	GTSSWE201340.01	exon	F29D10.3	F29D10.3	chrI	8846003	-	12	0.8493	415	-1	CE43931 | F29D10.3 | WBGene00009252 | WP:CE43931
UTGB	GTSSWE201341.01	outron	hum-1	F29D10.4	chrI	8853165	-	32	2.446	2077	2056	CE05763 | F29D10.4 | WBGene00002035 | WP:CE05763 | hum-1
UTGB	GTSSWE201342.01	outron	ztf-26	F55H12.6a	chrI	8863792	-	15	0	2527	2527	CE05764 | CE37023 | CE40968 | F55H12.6 | F55H12.6a | F55H12.6b | F55H12.6c | WBGene00010137 | WP:CE05764 | WP:CE37023 | WP:CE40968 | ztf-26
UTGB	GTSSWE201343.01	outron	F55H12.2	F55H12.2	chrI	8865667	+	27	0	2302	2272	CE32440 | F55H12.2 | WBGene00010133 | WP:CE32440
UTGB	GTSSWE201344.01	outron	F55H12.5	F55H12.5	chrI	8869207	+	17	0	892	889	CE32441 | F55H12.5 | WBGene00010136 | WP:CE32441
UTGB	GTSSWE201346.02	outron	F55H12.4	F55H12.4	chrI	8896751	-	29	0	2622	2621	CE11212 | F55H12.4 | WBGene00010135 | WP:CE11212
UTGB	GTSSWE201347.02	outron	unc-29	T08G11.5	chrI	8902590	-	28	1.616	1169	1162	CE13451 | T08G11.5 | T08G11.5.1 | T08G11.5.2 | WBGene00006765 | WP:CE13451 | tmr-4 | unc-21 | unc-29 | unc-56
UTGB	GTSSWE201348.08	outron	T08G11.4	T08G11.4a.1	chrI	8905512	-	89	0.4556	72	53	CE13449 | CE23958 | T08G11.4 | T08G11.4a | T08G11.4a.1 | T08G11.4a.2 | T08G11.4b | T08G11.4b.1 | T08G11.4b.2 | T08G11.4b.3 | T08G11.4b.4 | WBGene00011631 | WP:CE13449 | WP:CE23958
UTGB	GTSSWE201349.03	outron	T08G11.1	T08G11.1b	chrI	8917245	-	17	0	448	447	CE13443 | CE30353 | T08G11.1 | T08G11.1a | T08G11.1b | T08G11.1b.1 | T08G11.1b.2 | WBGene00011629 | WP:CE13443 | WP:CE30353
UTGB	GTSSWE201350.02	exon	T08G11.3	T08G11.3	chrI	8920600	+	38	0	740	-1	CE42164 | T08G11.3 | WBGene00011630 | WP:CE42164
UTGB	GTSSWE201351.06	outron	tsp-15	F53B6.1	chrI	8928145	+	61	1.991	603	597	CE26464 | F53B6.1 | WBGene00006641 | WP:CE26464 | tsp-15
UTGB	GTSSWE201352.01	exon	fip-6	F53B6.9	chrI	8946192	-	26	0	20	-1	CE30539 | F53B6.9 | WBGene00009964 | WP:CE30539 | fip-6
UTGB	GTSSWE201353.01	exon	fipr-26	F53B6.8	chrI	8947192	-	17	0	23	-1	CE23765 | F53B6.8 | WBGene00009963 | WP:CE23765 | fipr-26
UTGB	GTSSWE201354.01	exon	F53B6.4	F53B6.4	chrI	8948880	-	31	1.57	176	-1	CE10896 | F53B6.4 | WBGene00009959 | WP:CE10896
UTGB	GTSSWE201355.02	exon	F32H2.11	F32H2.11	chrI	8960881	-	69	13.23	26	-1	CE37512 | F32H2.11 | WBGene00043049 | WP:CE37512
UTGB	GTSSWE201356.07	outron	gei-11	F32H2.1b	chrI	8962151	+	146	4.711	191	163	CE09876 | CE17749 | F32H2.1 | F32H2.1a | F32H2.1b | WBGene00001568 | WP:CE09876 | WP:CE17749 | gei-11
UTGB	GTSSWE201358.05	outron	spd-2	F32H2.3.1	chrI	8970098	-	225	1.557	34	24	CE09878 | F32H2.3 | F32H2.3.1 | F32H2.3.2 | WBGene00004953 | WP:CE09878 | spd-2
UTGB	GTSSWE201359.11	outron	F32H2.10	F32H2.10	chrI	8970212	+	102	0	95	73	CE28926 | F32H2.10 | WBGene00009346 | WP:CE28926
UTGB	GTSSWE201360.09	exon	F32H2.12	F32H2.12	chrI	8975849	-	315	3.605	1281	-1	CE41534 | F32H2.12 | WBGene00050880 | WP:CE41534
UTGB	GTSSWE201362.02	exon	F32H2.8	F32H2.8	chrI	8988678	+	16	0	2132	-1	CE42107 | F32H2.8 | WBGene00009345 | WP:CE42107
UTGB	GTSSWE201363.01	exon	tba-6	F32H2.9	chrI	8993994	+	13	2.353	49	-1	CE34484 | F32H2.9 | WBGene00006532 | WP:CE34484 | tba-6
UTGB	GTSSWE201364.01	exon	F32H2.7	F32H2.7	chrI	8998536	-	15	0	1358	-1	CE39362 | F32H2.7 | WBGene00009344 | WP:CE39362
UTGB	GTSSWE201365.01	outron	F32H2.6	F32H2.6	chrI	8999750	-	24	3.838	193	181	CE09881 | F32H2.6 | WBGene00009343 | WP:CE09881 | phi-46
UTGB	GTSSWE201366.02	exon	F36F2.7	F36F2.7	chrI	9002096	-	34	0	523	-1	CE34845 | F36F2.7 | WBGene00009480 | WP:CE34845
UTGB	GTSSWE201367.07	outron	syx-7	F36F2.4.1	chrI	9003975	-	103	16.84	43	26	CE40328 | F36F2.4 | F36F2.4.1 | F36F2.4.2 | WBGene00009478 | WP:CE40328 | syn-13 | syx-7
UTGB	GTSSWE201368.05	outron	fcp-1	F36F2.6	chrI	9008954	-	26	1.907	253	253	CE39366 | F36F2.6 | WBGene00009479 | WP:CE39366 | fcp-1
UTGB	GTSSWE201369.06	outron	tag-214	F36F2.3b	chrI	9014040	-	260	4.154	189	162	CE34550 | CE39152 | F36F2.3 | F36F2.3a | F36F2.3b | WBGene00009477 | WP:CE34550 | WP:CE39152 | tag-214
UTGB	GTSSWE201370.05	exon	F36F2.8	F36F2.8	chrI	9017403	-	30	0	1699	-1	CE34846 | F36F2.8 | WBGene00009481 | WP:CE34846
UTGB	GTSSWE201371.01	outron	F36F2.2	F36F2.2	chrI	9014170	+	25	0	2619	2588	CE15976 | F36F2.2 | WBGene00009476 | WP:CE15976
UTGB	GTSSWE201372.01	exon	F36F2.1	F36F2.1	chrI	9018626	+	23	0	100	-1	CE15975 | CE42715 | F36F2.1 | F36F2.1a | F36F2.1b | F36F2.1b.1 | F36F2.1b.2 | WBGene00009475 | WP:CE15975 | WP:CE42715
UTGB	GTSSWE201373.03	exon	C31H5.7	C31H5.7	chrI	9041313	+	22	0	53	-1	C31H5.7 | CE34724 | WBGene00007858 | WP:CE34724
UTGB	GTSSWE201375.02	exon	C31H5.6	C31H5.6	chrI	9048237	-	15	0	1631	-1	C31H5.6 | C31H5.6a | C31H5.6a.1 | C31H5.6a.2 | C31H5.6b | CE42766 | CE42779 | WBGene00007857 | WP:CE42766 | WP:CE42779
UTGB	GTSSWE201376.01	outron	C31H5.5	C31H5.5	chrI	9049408	-	19	0	83	68	C31H5.5 | CE17485 | WBGene00007856 | WP:CE17485
UTGB	GTSSWE201377.06	exon	hgo-1	W06D4.1	chrI	9055391	-	401	1.358	63	-1	CE29602 | HGO | W06D4.1 | WBGene00001843 | WP:CE29602 | hgo-1
UTGB	GTSSWE201378.02	outron	W06D4.2	W06D4.2	chrI	9055496	+	38	0	915	864	CE41272 | W06D4.2 | WBGene00012296 | WP:CE41272
UTGB	GTSSWE201379.01	exon	W06D4.3	W06D4.3	chrI	9058437	+	12	0	444	-1	CE16545 | W06D4.3 | WBGene00012297 | WP:CE16545
UTGB	GTSSWE201380.04	outron	prmt-2	W06D4.4.1	chrI	9063466	-	32	0	326	313	CE16546 | W06D4.4 | W06D4.4.1 | W06D4.4.2 | WBGene00012298 | WP:CE16546 | prmt-2
UTGB	GTSSWE201381.01	outron	snx-3	W06D4.5	chrI	9064683	-	20	0	292	287	CE16547 | W06D4.5 | WBGene00006503 | WP:CE16547 | snx-3 | tag-157
UTGB	GTSSWE201382.02	outron	rad-54	W06D4.6	chrI	9064782	+	26	0	297	295	CE25143 | W06D4.6 | WBGene00004298 | WP:CE25143 | rad-54
UTGB	GTSSWE201384.03	outron	T06D10.2	T06D10.2.1	chrI	9080092	-	96	0.8054	88	75	CE25102 | T06D10.2 | T06D10.2.1 | T06D10.2.2 | WBGene00011532 | WP:CE25102
UTGB	GTSSWE201385.07	outron	mef-2	W10D5.1	chrI	9095577	+	122	0.8759	427	372	CE25156 | W10D5.1 | WBGene00003182 | WP:CE25156 | mef-2
UTGB	GTSSWE201387.06	outron	nduf-7	W10D5.2.1	chrI	9110869	-	40	0	269	269	CE14780 | W10D5.2 | W10D5.2.1 | W10D5.2.2 | WBGene00012376 | WP:CE14780 | nduf-7
UTGB	GTSSWE201388.41	outron	gld-4	ZK858.1	chrI	9118052	+	35	0	130	55	CE42850 | WBGene00014115 | WP:CE42850 | ZK858.1 | gld-4
UTGB	GTSSWE201389.19	exon	ZK858.8	ZK858.8	chrI	9122104	+	150	0.9288	2616	-1	CE35173 | WBGene00014121 | WP:CE35173 | ZK858.8
UTGB	GTSSWE201391.11	outron	mel-26	ZK858.4	chrI	9130093	+	37	0.9613	2442	2437	CE30580 | WBGene00003209 | WP:CE30580 | ZK858.4 | mel-26
UTGB	GTSSWE201392.01	outron	ZK858.5	ZK858.5	chrI	9138767	-	44	17.73	418	415	CE34235 | WBGene00014118 | WP:CE34235 | ZK858.5
UTGB	GTSSWE201393.07	outron	ZK858.6.2	ZK858.6.2	chrI	9141764	-	163	3.296	251	248	CE15431 | CE16751 | WBGene00014119 | WP:CE15431 | WP:CE16751 | ZK858.6 | ZK858.6.1 | ZK858.6.2 | ZK858.6a | ZK858.6b | ZK858.6b.1 | ZK858.6b.2
UTGB	GTSSWE201394.09	outron	ZK858.7	ZK858.7	chrI	9144560	-	23	0	198	191	CE35204 | WBGene00014120 | WP:CE35204 | ZK858.7
UTGB	GTSSWE201395.01	exon	H32K16.2	H32K16.2	chrI	9157687	-	36	0	2989	-1	CE34907 | H32K16.2 | WBGene00010422 | WP:CE34907
UTGB	GTSSWE201396.03	outron	F25H5.6	F25H5.6.1	chrI	9159594	-	28	0	79	79	CE29591 | F25H5.6 | F25H5.6.1 | F25H5.6.2 | WBGene00009128 | WP:CE29591
UTGB	GTSSWE201398.09	exon	eef-2	F25H5.4.2	chrI	9163569	+	8861	0.6056	77	-1	CE15900 | F25H5.4 | F25H5.4.1 | F25H5.4.2 | F25H5.4.3 | F25H5.4.4 | WBGene00001167 | WP:CE15900 | eef-2 | eft-2
UTGB	GTSSWE201399.09	outron	pyk-1	F25H5.3a	chrI	9167415	+	30	0	1040	1009	CE15898 | CE15899 | CE36135 | CE37832 | CE43392 | F25H5.3 | F25H5.3a | F25H5.3a.1 | F25H5.3a.2 | F25H5.3b | F25H5.3c | F25H5.3c.1 | F25H5.3c.2 | F25H5.3d | F25H5.3e | WBGene00009126 | WP:CE15898 | WP:CE15899 | WP:CE36135 | WP:CE37832 | WP:CE43392 | pyk-1
UTGB	GTSSWE201400.16	outron	F25H5.2	F25H5.2	chrI	9182083	-	58	8.404	1087	1064	CE15897 | F25H5.2 | WBGene00009125 | WP:CE15897
UTGB	GTSSWE201401.02	outron	lim-9	F25H5.1f	chrI	9211123	-	24	0	793	793	CE15896 | CE37827 | CE37828 | CE37829 | CE37830 | CE41643 | F25H5.1 | F25H5.1a | F25H5.1b | F25H5.1c | F25H5.1c.1 | F25H5.1c.2 | F25H5.1c.3 | F25H5.1d | F25H5.1e | F25H5.1f | WBGene00006407 | WP:CE15896 | WP:CE37827 | WP:CE37828 | WP:CE37829 | WP:CE37830 | WP:CE41643 | lim-9 | tag-15
UTGB	GTSSWE201402.03	outron	C45G3.4	C45G3.4	chrI	9221824	-	15	0	1103	1065	C45G3.4 | CE42078 | WBGene00008109 | WP:CE42078
UTGB	GTSSWE201403.02	outron	aspm-1	C45G3.1	chrI	9226820	-	119	8.817	444	437	C45G3.1 | CE15710 | WBGene00008107 | WP:CE15710 | aspm-1 | tag-255
UTGB	GTSSWE201404.15	exon	gip-2	C45G3.3	chrI	9226945	+	226	0.9637	38	-1	C45G3.3 | CE37811 | WBGene00001590 | WP:CE37811 | gip-2
UTGB	GTSSWE201405.01	outron	C45G3.5	C45G3.5	chrI	9228050	+	11	1.816	105	105	C45G3.5 | CE37812 | WBGene00044008 | WP:CE37812
UTGB	GTSSWE201406.13	outron	aph-1	VF36H2L.1	chrI	9234414	-	99	1.462	864	861	CE16526 | VF36H2L.1 | WBGene00000147 | WP:CE16526 | aph-1 | pen-1
UTGB	GTSSWE201408.05	exon	F36H2.2	F36H2.2	chrI	9249355	-	210	1.481	142	-1	CE36380 | F36H2.2 | WBGene00009499 | WP:CE36380
UTGB	GTSSWE201409.03	outron	F36H2.3	F36H2.3	chrI	9262970	-	18	0	1337	1320	CE42998 | F36H2.3 | WBGene00009500 | WP:CE42998
UTGB	GTSSWE201410.22	exon	F14B4.1	F14B4.1	chrI	9270927	-	405	4.394	20	-1	CE38950 | F14B4.1 | WBGene00008779 | WP:CE38950
UTGB	GTSSWE201411.02	outron	F14B4.2	F14B4.2b	chrI	9281250	-	39	0.7234	2642	2569	CE05628 | CE36925 | F14B4.2 | F14B4.2a | F14B4.2a.1 | F14B4.2a.2 | F14B4.2b | WBGene00008780 | WP:CE05628 | WP:CE36925
UTGB	GTSSWE201412.08	outron	F14B4.3	F14B4.3	chrI	9286686	-	219	0.6832	132	129	CE05629 | F14B4.3 | WBGene00008781 | WP:CE05629
UTGB	GTSSWE201413.03	outron	prom-1	F26H9.1	chrI	9286773	+	39	0	665	657	CE41801 | F26H9.1 | WBGene00009173 | WP:CE41801 | prom-1
UTGB	GTSSWE201414.19	outron	F26H9.2	F26H9.2	chrI	9294576	-	36	0	723	721	CE43857 | F26H9.2 | WBGene00009174 | WP:CE43857
UTGB	GTSSWE201415.03	outron	F26H9.4	F26H9.4	chrI	9307629	-	43	0	818	793	CE09709 | F26H9.4 | WBGene00009176 | WP:CE09709
UTGB	GTSSWE201416.05	outron	rab-5	F26H9.6.1	chrI	9307789	+	133	1.124	647	644	CE09711 | F26H9.6 | F26H9.6.1 | F26H9.6.2 | WBGene00004268 | WP:CE09711 | rab-5
UTGB	GTSSWE201417.07	outron	uev-3	F26H9.7	chrI	9309922	+	84	1.098	398	391	CE42102 | F26H9.7 | WBGene00006732 | WP:CE42102 | uev-3
UTGB	GTSSWE201418.07	outron	F26H9.5	F26H9.5	chrI	9315573	-	109	0.5748	1129	1093	CE09710 | F26H9.5 | WBGene00009177 | WP:CE09710
UTGB	GTSSWE201419.02	exon	F26H9.8	F26H9.8	chrI	9315928	+	19	0	1799	-1	CE42103 | F26H9.8 | WBGene00009178 | WP:CE42103
UTGB	GTSSWE201420.01	outron	lin-41	C12C8.3a	chrI	9343746	-	12	0	1857	1841	C12C8.3 | C12C8.3a | C12C8.3b | C12C8.3b.1 | C12C8.3b.2 | CE27062 | CE27063 | WBGene00003026 | WP:CE27062 | WP:CE27063 | lep-1 | lin-41 | lin-41A | lin-41B
UTGB	GTSSWE201422.02	exon	ppfr-1	F16A11.3d	chrI	9390770	-	16	0	461	-1	CE37103 | CE37104 | CE37105 | CE44414 | F16A11.3 | F16A11.3a | F16A11.3b | F16A11.3c | F16A11.3c.1 | F16A11.3c.2 | F16A11.3d | WBGene00008878 | WP:CE37103 | WP:CE37104 | WP:CE37105 | WP:CE44414 | ppfr-1
UTGB	GTSSWE201423.09	outron	F16A11.2	F16A11.2	chrI	9394236	-	53	15.58	1149	1148	CE23663 | F16A11.2 | WBGene00008877 | WP:CE23663
UTGB	GTSSWE201424.01	outron	F16A11.1	F16A11.1	chrI	9405411	-	25	0	1399	1386	CE17679 | CE42783 | F16A11.1 | F16A11.1a | F16A11.1b | WBGene00008876 | WP:CE17679 | WP:CE42783
UTGB	GTSSWE201425.03	exon	C17E4.1	C17E4.1	chrI	9411995	-	63	2.942	1908	-1	C17E4.1 | C17E4.1a | C17E4.1b | CE39896 | CE42658 | WBGene00007641 | WP:CE39896 | WP:CE42658
UTGB	GTSSWE201426.01	outron	C17E4.2	C17E4.2	chrI	9410444	+	80	2.25	162	160	C17E4.2 | CE08251 | WBGene00007642 | WP:CE08251
UTGB	GTSSWE201427.01	outron	C17E4.3	C17E4.3	chrI	9419295	-	35	0	429	420	C17E4.3 | CE37199 | WBGene00007643 | WP:CE37199
UTGB	GTSSWE201429.09	outron	C17E4.11	C17E4.11	chrI	9421140	-	31	0	342	334	C17E4.11 | C17E4.11.1 | C17E4.11.2 | CE38274 | WBGene00044236 | WP:CE38274
UTGB	GTSSWE201431.06	outron	C17E4.6	C17E4.6	chrI	9422452	+	33	1.782	106	96	C17E4.6 | CE25780 | WBGene00007645 | WP:CE25780
UTGB	GTSSWE201432.22	outron	nkb-1	C17E4.9	chrI	9431141	+	110	2.979	206	100	C17E4.9 | C17E4.9.1 | C17E4.9.2 | C17E4.9.3 | CE08258 | WBGene00007646 | WP:CE08258 | nkb-1
UTGB	GTSSWE201435.03	exon	F46A9.1	F46A9.1	chrI	9456574	+	22	0	1315	-1	CE10572 | F46A9.1 | WBGene00009754 | WP:CE10572
UTGB	GTSSWE201436.01	exon	F46A9.2	F46A9.2	chrI	9459278	+	10	0	17	-1	CE10574 | F46A9.2 | WBGene00009755 | WP:CE10574
UTGB	GTSSWE201437.01	outron	twk-29	F46A9.3b	chrI	9463308	+	11	0	534	444	CE32666 | CE38354 | F46A9.3 | F46A9.3a | F46A9.3b | WBGene00006681 | WP:CE32666 | WP:CE38354 | twk-29
UTGB	GTSSWE201438.01	outron	skr-2	F46A9.4	chrI	9469547	+	19	0	148	134	CE10578 | F46A9.4 | WBGene00004808 | WP:CE10578 | skr-2
UTGB	GTSSWE201439.14	outron	skr-1	F46A9.5.1	chrI	9471340	+	214	18.53	215	202	CE10580 | F46A9.5 | F46A9.5.1 | F46A9.5.2 | F46A9.5.3 | WBGene00004807 | WP:CE10580 | skr-1
UTGB	GTSSWE201440.01	exon	F30A10.14	F30A10.14	chrI	9475835	+	16	0	787	-1	CE41232 | F30A10.14 | WBGene00045473 | WP:CE41232
UTGB	GTSSWE201441.02	outron	F30A10.13	F30A10.13b.2	chrI	9478995	-	17	0	312	258	CE41230 | CE41231 | F30A10.13 | F30A10.13a | F30A10.13b | F30A10.13b.1 | F30A10.13b.2 | WBGene00044680 | WP:CE41230 | WP:CE41231
UTGB	GTSSWE201442.04	exon	F30A10.2	F30A10.2	chrI	9480697	-	96	0.5495	165	-1	CE39360 | F30A10.2 | WBGene00009261 | WP:CE39360
UTGB	GTSSWE201443.01	exon	F30A10.12	F30A10.12	chrI	9480886	+	11	0	814	-1	CE34834 | F30A10.12 | WBGene00009269 | WP:CE34834
UTGB	GTSSWE201444.07	exon	F30A10.4	F30A10.4	chrI	9483201	+	34	0	600	-1	CE09805 | F30A10.4 | WBGene00009263 | WP:CE09805
UTGB	GTSSWE201445.09	outron	stl-1	F30A10.5.1	chrI	9488246	-	982	0.9931	228	225	CE32397 | F30A10.5 | F30A10.5.1 | F30A10.5.2 | WBGene00006061 | WP:CE32397 | stl-1
UTGB	GTSSWE201446.02	outron	sac-1	F30A10.6	chrI	9488377	+	166	6.707	132	102	CE09807 | F30A10.6 | WBGene00009264 | WP:CE09807 | sac-1
UTGB	GTSSWE201447.08	outron	F30A10.3	F30A10.3.1	chrI	9494998	-	34	0	506	451	CE32396 | F30A10.3 | F30A10.3.1 | F30A10.3.2 | WBGene00009262 | WP:CE32396
UTGB	GTSSWE201449.06	outron	F30A10.9	F30A10.9	chrI	9505840	-	108	0.486	83	80	CE09810 | F30A10.9 | F30A10.9.1 | F30A10.9.2 | WBGene00009266 | WP:CE09810
UTGB	GTSSWE201450.04	outron	usp-48	F30A10.10	chrI	9506272	+	19	0	275	272	CE32639 | F30A10.10 | WBGene00009267 | WP:CE32639 | usp-48
UTGB	GTSSWE201451.05	outron	smn-1	C41G7.1b	chrI	9512114	-	58	7.462	24	21	C41G7.1 | C41G7.1a | C41G7.1b | CE08665 | CE27843 | SMN | WBGene00004887 | WP:CE08665 | WP:CE27843 | smn-1
UTGB	GTSSWE201453.01	outron	C41G7.3	C41G7.3	chrI	9520402	-	18	0	1713	1676	C41G7.3 | CE42810 | WBGene00008061 | WP:CE42810
UTGB	GTSSWE201455.02	outron	ahr-1	C41G7.5a	chrI	9521538	+	38	0.7076	1031	1005	C41G7.5 | C41G7.5a | C41G7.5b | C41G7.5b.1 | C41G7.5b.2 | CE20561 | CE38293 | WBGene00000096 | WP:CE20561 | WP:CE38293 | ahr-1
UTGB	GTSSWE201458.03	exon	C36F7.2	C36F7.2	chrI	9546521	+	28	0	1710	-1	C36F7.2 | C36F7.2.1 | C36F7.2.2 | CE24828 | WBGene00007985 | WP:CE24828
UTGB	GTSSWE201459.07	exon	C36F7.5	C36F7.5	chrI	9578462	-	35	0	2446	-1	C36F7.5 | CE08609 | WBGene00007986 | WP:CE08609
UTGB	GTSSWE201460.01	outron	F42H11.1	F42H11.1	chrI	9575449	+	14	0	899	860	CE10330 | F42H11.1 | WBGene00009646 | WP:CE10330
UTGB	GTSSWE201461.02	outron	lem-3	F42H11.2.1	chrI	9581548	-	80	3.232	289	289	CE10332 | F42H11.2 | F42H11.2.1 | F42H11.2.2 | WBGene00002276 | WP:CE10332 | lem-3
UTGB	GTSSWE201462.01	outron	K07A1.1	K07A1.1	chrI	9583524	-	26	0	71	63	CE40418 | K07A1.1 | WBGene00010608 | WP:CE40418
UTGB	GTSSWE201463.10	outron	K07A1.13	K07A1.13	chrI	9585243	-	50	0	520	440	CE18857 | K07A1.13 | WBGene00010617 | WP:CE18857
UTGB	GTSSWE201464.05	outron	dut-1	K07A1.2.1	chrI	9585359	+	726	0.7705	53	53	CE18855 | K07A1.2 | K07A1.2.1 | K07A1.2.2 | K07A1.2.3 | WBGene00010609 | WP:CE18855 | dut-1
UTGB	GTSSWE201465.04	exon	K07A1.3	K07A1.3	chrI	9588095	-	519	5.793	25	-1	CE41247 | K07A1.3 | WBGene00010610 | WP:CE41247
UTGB	GTSSWE201466.01	exon	K07A1.5	K07A1.5	chrI	9587739	+	23	0	2875	-1	CE11848 | K07A1.5 | WBGene00010612 | WP:CE11848
UTGB	GTSSWE201467.01	exon	K07A1.6	K07A1.6	chrI	9595097	-	34	0	2033	-1	CE18856 | K07A1.6 | WBGene00010613 | WP:CE18856
UTGB	GTSSWE201468.01	outron	aqp-9	K07A1.16	chrI	9605910	+	17	0	343	334	CE41143 | K07A1.16 | WBGene00000177 | WP:CE41143 | aqp-9
UTGB	GTSSWE201469.01	outron	K07A1.15	K07A1.15	chrI	9609806	-	188	1.555	313	272	CE34919 | K07A1.15 | WBGene00010619 | WP:CE34919
UTGB	GTSSWE201470.02	outron	ile-1	K07A1.8.1	chrI	9611603	-	146	0.9276	79	77	CE11854 | K07A1.8 | K07A1.8.1 | K07A1.8.2 | WBGene00002070 | WP:CE11854 | ile-1
UTGB	GTSSWE201471.03	outron	rba-1	K07A1.11	chrI	9618319	-	21	0.6318	226	220	CE11860 | K07A1.11 | K07A1.11.1 | K07A1.11.2 | WBGene00004312 | WP:CE11860 | rba-1
UTGB	GTSSWE201472.01	outron	lin-53	K07A1.12.1	chrI	9622043	-	62	0	2294	2291	CE16234 | K07A1.12 | K07A1.12.1 | K07A1.12.2 | WBGene00003036 | WP:CE16234 | lin-53 | rba-2
UTGB	GTSSWE201473.02	outron	nra-2	T05F1.1a	chrI	9620051	+	333	15.3	173	173	CE13267 | CE41012 | T05F1.1 | T05F1.1a | T05F1.1a.1 | T05F1.1a.2 | T05F1.1b | WBGene00011488 | WP:CE13267 | WP:CE41012 | nra-2
UTGB	GTSSWE201474.04	exon	T05F1.2	T05F1.2	chrI	9622596	+	806	4.001	17	-1	CE18929 | T05F1.2 | WBGene00011489 | WP:CE18929
UTGB	GTSSWE201475.01	outron	rps-19	T05F1.3.1	chrI	9626002	-	155	13.44	219	214	CE13265 | T05F1.3 | T05F1.3.1 | T05F1.3.2 | WBGene00004488 | WP:CE13265 | rpS19 | rps-19
UTGB	GTSSWE201476.07	outron	hsr-9	T05F1.6	chrI	9626147	+	156	5.46	119	85	CE36405 | T05F1.6 | WBGene00002027 | WP:CE36405 | hsr-9
UTGB	GTSSWE201477.03	outron	T05F1.4	T05F1.4	chrI	9630418	+	85	14	969	961	CE13261 | T05F1.4 | T05F1.4.1 | T05F1.4.2 | WBGene00011490 | WP:CE13261
UTGB	GTSSWE201478.06	exon	dhs-4	T05F1.10	chrI	9649206	-	304	1.708	29	-1	CE26900 | T05F1.10 | WBGene00000968 | WP:CE26900 | dhs-4
UTGB	GTSSWE201479.07	exon	T05F1.13	T05F1.13	chrI	9650476	+	224	3.833	118	-1	CE32487 | T05F1.13 | WBGene00011497 | WP:CE32487
UTGB	GTSSWE201480.01	exon	T05F1.11	T05F1.11	chrI	9653045	+	17	0	84	-1	CE32486 | T05F1.11 | WBGene00011495 | WP:CE32486
UTGB	GTSSWE201482.01	outron	npp-14	C03D6.4	chrI	9665145	-	87	0	241	239	C03D6.4 | CE05198 | CeNup214 | WBGene00003800 | WP:CE05198 | npp-14
UTGB	GTSSWE201483.03	exon	cel-1	C03D6.3a	chrI	9665237	+	1168	16.05	64	-1	C03D6.3 | C03D6.3a | C03D6.3b | CE05197 | CE32300 | WBGene00000466 | WP:CE05197 | WP:CE32300 | cel-1
UTGB	GTSSWE201485.04	outron	rpl-24.2	C03D6.8.1	chrI	9669300	+	35	0	111	105	C03D6.8 | C03D6.8.1 | C03D6.8.2 | C03D6.8.3 | CE05202 | WBGene00004437 | WP:CE05202 | rpl-24.2
UTGB	GTSSWE201484.02	outron	C03D6.1	C03D6.1	chrI	9671905	-	13	0	1199	1188	C03D6.1 | CE05195 | WBGene00007275 | WP:CE05195
UTGB	GTSSWE201486.03	exon	ikb-1	C04F12.3	chrI	9685484	+	452	0.9844	60	-1	C04F12.3 | CE19676 | WBGene00002069 | WP:CE19676 | ikb-1
UTGB	GTSSWE201487.03	outron	rpl-14	C04F12.4.1	chrI	9688956	+	30	1.546	236	231	C04F12.4 | C04F12.4.1 | C04F12.4.2 | CE19677 | WBGene00004426 | WP:CE19677 | rpl-14
UTGB	GTSSWE201488.01	exon	C04F12.7	C04F12.7	chrI	9696749	-	20	1.802	48	-1	C04F12.7 | CE19680 | WBGene00007301 | WP:CE19680
UTGB	GTSSWE201489.02	outron	C04F12.8	C04F12.8	chrI	9701176	-	17	0	1630	1626	C04F12.8 | CE19681 | WBGene00007302 | WP:CE19681
UTGB	GTSSWE201490.01	outron	rnh-1.3	C04F12.9	chrI	9711069	-	13	0	335	333	C04F12.9 | CE19682 | WBGene00007303 | WP:CE19682 | rnh-1.3
UTGB	GTSSWE201491.08	outron	fce-1	C04F12.10	chrI	9712764	-	20	1.297	55	54	C04F12.10 | C04F12.10.1 | C04F12.10.2 | CE19683 | Ce-face-1 | WBGene00001405 | WP:CE19683 | fce-1
UTGB	GTSSWE201492.03	outron	C16C2.4	C16C2.4	chrI	9715588	-	30	3.762	376	367	C16C2.4 | C16C2.4.1 | C16C2.4.2 | C16C2.4.3 | CE15621 | WBGene00007621 | WP:CE15621
UTGB	GTSSWE201494.19	outron	eat-16	C16C2.2a.1	chrI	9722629	+	209	2.019	165	82	C16C2.2 | C16C2.2a | C16C2.2a.1 | C16C2.2a.2 | C16C2.2b | CE17404 | CE30491 | WBGene00001145 | WP:CE17404 | WP:CE30491 | eat-16 | sag-2
UTGB	GTSSWE201495.40	exon	ceh-5	C16C2.1	chrI	9727190	+	180	3.172	17	-1	C16C2.1 | CE40300 | WBGene00000430 | WP:CE40300 | ceh-5
UTGB	GTSSWE201493.01	exon	ocrl-1	C16C2.3a	chrI	9730352	-	15	0	2253	-1	C16C2.3 | C16C2.3a | C16C2.3b | C16C2.3b.1 | C16C2.3b.2 | CE41201 | CE41202 | WBGene00007620 | WP:CE41201 | WP:CE41202 | ocrl-1
UTGB	GTSSWE201497.13	exon	K02A11.2	K02A11.2	chrI	9743659	+	323	17.27	573	-1	CE41675 | K02A11.2 | WBGene00010487 | WP:CE41675
UTGB	GTSSWE201498.03	outron	K02A11.3	K02A11.3	chrI	9747952	-	129	0.5093	45	38	CE06057 | K02A11.3 | WBGene00010488 | WP:CE06057
UTGB	GTSSWE201499.01	exon	K02A11.4	K02A11.4	chrI	9752355	-	17	0	2448	-1	CE39024 | K02A11.4 | WBGene00044607 | WP:CE39024
UTGB	GTSSWE201501.02	outron	F26E4.2	F26E4.2	chrI	9761555	-	14	0	779	779	CE09686 | F26E4.2 | WBGene00009157 | WP:CE09686
UTGB	GTSSWE201502.04	exon	F26E4.3	F26E4.3.1	chrI	9767852	-	124	1.09	77	-1	CE42101 | F26E4.3 | F26E4.3.1 | F26E4.3.2 | WBGene00009158 | WP:CE42101
UTGB	GTSSWE201503.04	outron	F26E4.4	F26E4.4.1	chrI	9772624	-	68	2.975	73	68	CE09688 | F26E4.4 | F26E4.4.1 | F26E4.4.2 | F26E4.4.3 | WBGene00009159 | WP:CE09688
UTGB	GTSSWE201504.03	outron	F26E4.6	F26E4.6.1	chrI	9772735	+	61	4.529	431	430	CE30519 | F26E4.6 | F26E4.6.1 | F26E4.6.2 | WBGene00009161 | WP:CE30519
UTGB	GTSSWE201505.07	exon	F26E4.7	F26E4.7b	chrI	9774217	+	525	19.56	53	-1	CE09691 | CE30520 | F26E4.7 | F26E4.7a | F26E4.7b | WBGene00009162 | WP:CE09691 | WP:CE30520
UTGB	GTSSWE201506.09	outron	F26E4.12	F26E4.12	chrI	9779486	+	46	0	853	853	CE09696 | F26E4.12 | WBGene00009165 | WP:CE09696
UTGB	GTSSWE201507.04	outron	drsh-1	F26E4.10a	chrI	9785790	-	31	0.7931	77	77	CE29039 | CE41799 | F26E4.10 | F26E4.10a | F26E4.10b | WBGene00009163 | WP:CE29039 | WP:CE41799 | drsh-1
UTGB	GTSSWE201508.09	outron	tba-1	F26E4.8.1	chrI	9788596	-	405	1.934	1228	1215	CE09692 | F26E4.8 | F26E4.8.1 | F26E4.8.2 | TUBA3 | WBGene00006528 | WP:CE09692 | tba-1
UTGB	GTSSWE201509.05	outron	cco-1	F26E4.9.2	chrI	9788766	+	580	19.2	233	233	CE09693 | F26E4.9 | F26E4.9.1 | F26E4.9.2 | F26E4.9.3 | WBGene00000371 | WP:CE09693 | cco-1 | lpd-4
UTGB	GTSSWE201511.02	outron	nhr-62	Y67A6A.2	chrI	9837262	+	61	0	2337	2326	CE27305 | CE42745 | WBGene00003652 | WP:CE27305 | WP:CE42745 | Y67A6A.2 | Y67A6A.2a | Y67A6A.2b | Y67A6A.2b.1 | Y67A6A.2b.2 | Y67A6A.2b.3 | nhr-62
UTGB	GTSSWE201512.05	outron	zig-1	K10C3.3	chrI	9846510	+	49	0.6873	887	886	CE30349 | K10C3.3 | WBGene00006978 | WP:CE30349 | zig-1
UTGB	GTSSWE201514.27	outron	K10C3.4	K10C3.4	chrI	9858742	+	72	4.116	1751	1745	CE12080 | K10C3.4 | WBGene00010731 | WP:CE12080
UTGB	GTSSWE201515.34	outron	K10C3.5	K10C3.5a	chrI	9863195	+	234	8.729	394	385	CE32469 | CE38396 | K10C3.5 | K10C3.5a | K10C3.5b | WBGene00010732 | WP:CE32469 | WP:CE38396
UTGB	GTSSWE201516.09	exon	nhr-49	K10C3.6c.1	chrI	9869356	+	172	0.8566	352	-1	CE12084 | CE28943 | CE32693 | CE32694 | K10C3.6 | K10C3.6a | K10C3.6b | K10C3.6b.1 | K10C3.6b.2 | K10C3.6c | K10C3.6c.1 | K10C3.6c.2 | K10C3.6d | WBGene00003639 | WP:CE12084 | WP:CE28943 | WP:CE32693 | WP:CE32694 | nhr-49
UTGB	GTSSWE201517.01	exon	inx-20	T23H4.1	chrI	9874121	+	59	2.593	2397	-1	CE25125 | T23H4.1 | WBGene00002142 | WP:CE25125 | inx-20 | opu-20
UTGB	GTSSWE201518.14	outron	nhr-69	T23H4.2.1	chrI	9882248	-	61	2.202	764	755	CE32501 | T23H4.2 | T23H4.2.1 | T23H4.2.2 | WBGene00003659 | WP:CE32501 | nhr-69
UTGB	GTSSWE201519.02	outron	nas-5	T23H4.3	chrI	9883964	+	49	0	2226	2221	CE25126 | T23H4.3 | WBGene00003524 | WP:CE25126 | nas-5
UTGB	GTSSWE201520.02	outron	col-64	F52F12.2	chrI	9895944	-	142	2.766	357	95	CE10842 | F52F12.2 | WBGene00000640 | WP:CE10842 | col-64
UTGB	GTSSWE201522.02	outron	lsl-1	F52F12.4	chrI	9900781	+	24	0	488	488	CE36164 | F52F12.4 | WBGene00009937 | WP:CE36164 | lsl-1
UTGB	GTSSWE201524.01	exon	F52F12.8	F52F12.8	chrI	9923004	+	13	0	648	-1	CE34876 | F52F12.8 | WBGene00009941 | WP:CE34876
UTGB	GTSSWE201525.01	exon	F52F12.9	F52F12.9	chrI	9924749	+	15	0	1799	-1	CE36490 | F52F12.9 | WBGene00009942 | WP:CE36490
UTGB	GTSSWE201526.02	exon	F52F12.7	F52F12.7	chrI	9928969	+	285	4.082	750	-1	CE42711 | F52F12.7 | WBGene00009940 | WP:CE42711
UTGB	GTSSWE201527.01	exon	Y106G6A.4	Y106G6A.4	chrI	9930838	+	10	0	166	-1	CE41278 | WBGene00013696 | WP:CE41278 | Y106G6A.4
UTGB	GTSSWE201529.02	outron	Y106G6A.5	Y106G6A.5a	chrI	9936043	-	19	0	38	30	CE19298 | CE41040 | WBGene00013697 | WP:CE19298 | WP:CE41040 | Y106G6A.5 | Y106G6A.5a | Y106G6A.5b
UTGB	GTSSWE201532.04	outron	T24D1.2	T24D1.2.1	chrI	9955953	-	25	0.7306	129	97	CE29600 | T24D1.2 | T24D1.2.1 | T24D1.2.2 | WBGene00011985 | WP:CE29600
UTGB	GTSSWE201533.11	outron	tag-179	T24D1.4	chrI	9962059	-	67	0.4552	98	98	CE14168 | T24D1.4 | WBGene00007043 | WP:CE14168 | tag-179
UTGB	GTSSWE201535.01	exon	tsp-7	T23D8.2	chrI	9973544	-	186	7.111	487	-1	CE26006 | T23D8.2 | WBGene00006633 | WP:CE26006 | tsp-7
UTGB	GTSSWE201536.04	outron	T23D8.3	T23D8.3	chrI	9976597	-	120	13.75	321	292	CE14052 | T23D8.3 | T23D8.3.1 | T23D8.3.2 | WBGene00011944 | WP:CE14052
UTGB	GTSSWE201537.17	outron	eif-3.C	T23D8.4.1	chrI	9979827	-	313	8.687	177	175	CE18958 | T23D8.4 | T23D8.4.1 | T23D8.4.2 | WBGene00001226 | WP:CE18958 | eif-3.C
UTGB	GTSSWE201538.10	outron	sys-1	T23D8.9a	chrI	9984982	-	209	0.8143	206	167	CE18959 | CE27209 | T23D8.9 | T23D8.9a | T23D8.9b | WBGene00006379 | WP:CE18959 | WP:CE27209 | sys-1
UTGB	GTSSWE201539.02	exon	his-67	T23D8.5	chrI	9988785	-	45882	0.3691	32	-1	CE03252 | T23D8.5 | WBGene00001941 | WP:CE03252 | his-67
UTGB	GTSSWE201540.05	exon	his-68	T23D8.6	chrI	9989090	+	22297	6.764	31	-1	CE04501 | T23D8.6 | WBGene00001942 | WP:CE04501 | his-68
UTGB	GTSSWE201541.01	outron	T23D8.7	T23D8.7	chrI	9989570	+	21	0	223	221	CE42673 | T23D8.7 | T23D8.7.1 | T23D8.7.2 | WBGene00011945 | WP:CE42673
UTGB	GTSSWE201542.03	outron	cfi-1	T23D8.8	chrI	10002643	-	46	0.5346	2725	2725	CE31068 | T23D8.8 | WBGene00000476 | WP:CE31068 | cfi-1
UTGB	GTSSWE201543.01	exon	C03C11.1	C03C11.1	chrI	10011770	+	15	0	2959	-1	C03C11.1 | CE07873 | WBGene00007274 | WP:CE07873
UTGB	GTSSWE201544.01	exon	F10G8.2	F10G8.2	chrI	10024367	-	26	0	1614	-1	CE36532 | F10G8.2 | WBGene00008662 | WP:CE36532
UTGB	GTSSWE201545.02	exon	eak-6	F10G8.4a	chrI	10023648	+	16	0	151	-1	CE41631 | CE41632 | F10G8.4 | F10G8.4a | F10G8.4b | WBGene00008663 | WP:CE41631 | WP:CE41632 | eak-6
UTGB	GTSSWE201546.05	outron	npp-17	F10G8.3.1	chrI	10026130	+	110	0.5416	503	502	CE09338 | CeRAE1 | F10G8.3 | F10G8.3.1 | F10G8.3.2 | WBGene00003803 | WP:CE09338 | npp-17
UTGB	GTSSWE201547.12	outron	ercc-1	F10G8.7	chrI	10030118	+	28	3.073	56	30	CE30750 | F10G8.7 | F10G8.7.1 | F10G8.7.2 | WBGene00008665 | WP:CE30750 | ercc-1
UTGB	GTSSWE201548.23	outron	ncs-2	F10G8.5	chrI	10035420	-	79	11.36	652	615	CE09340 | F10G8.5 | F10G8.5.1 | F10G8.5.2 | WBGene00003564 | WP:CE09340 | ncs-2
UTGB	GTSSWE201549.03	outron	F10G8.6	F10G8.6	chrI	10046331	+	31	1.739	107	99	CE30749 | F10G8.6 | WBGene00008664 | WP:CE30749
UTGB	GTSSWE201551.02	outron	mut-16	B0379.3b	chrI	10079695	+	136	1.214	455	452	B0379.3 | B0379.3a | B0379.3b | B0379.3b.1 | B0379.3b.2 | CE40346 | CE40347 | WBGene00003508 | WP:CE40346 | WP:CE40347 | mut-16 | pqn-3
UTGB	GTSSWE201553.01	exon	B0379.6	B0379.6	chrI	10095964	+	12	0	1341	-1	B0379.6 | CE07729 | WBGene00007158 | WP:CE07729
UTGB	GTSSWE201552.05	outron	scpl-1	B0379.4a	chrI	10104672	-	36	0	2755	2738	B0379.4 | B0379.4a | B0379.4b | B0379.4c | CE34243 | CE34244 | CE41191 | WBGene00007054 | WP:CE34243 | WP:CE34244 | WP:CE41191 | scpl-1 | tag-188
UTGB	GTSSWE201554.03	exon	Y106G6D.1	Y106G6D.1	chrI	10110645	-	95	0.4606	1656	-1	CE42181 | WBGene00013698 | WP:CE42181 | Y106G6D.1
UTGB	GTSSWE201555.07	outron	Y106G6D.2	Y106G6D.2	chrI	10110864	+	257	0.7125	129	106	CE19300 | WBGene00013699 | WP:CE19300 | Y106G6D.2
UTGB	GTSSWE201556.04	outron	Y106G6D.8	Y106G6D.8.1	chrI	10117064	+	45	0.615	92	84	CE36226 | WBGene00013704 | WP:CE36226 | Y106G6D.8 | Y106G6D.8.1 | Y106G6D.8.2
UTGB	GTSSWE201559.01	exon	F16C3.2	F16C3.2	chrI	10155107	-	44	2.274	69	-1	CE23665 | F16C3.2 | WBGene00008886 | WP:CE23665
UTGB	GTSSWE201561.02	outron	tag-72	C25A1.3	chrI	10161962	-	76	1.24	96	89	C25A1.3 | C25A1.3.1 | C25A1.3.2 | CE36918 | WBGene00006447 | WP:CE36918 | tag-72
UTGB	GTSSWE201562.07	outron	C25A1.1	C25A1.1	chrI	10162297	+	191	3.521	81	73	C25A1.1 | CE08366 | WBGene00007705 | WP:CE08366
UTGB	GTSSWE201563.01	exon	fkh-10	C25A1.2	chrI	10168011	-	16	0	2725	-1	C25A1.2 | C25A1.2.1 | C25A1.2.2 | CE42739 | WBGene00001442 | WP:CE42739 | fkh-10
UTGB	GTSSWE201564.03	outron	C25A1.4	C25A1.4.1	chrI	10173204	-	61	14.85	647	611	C25A1.4 | C25A1.4.1 | C25A1.4.2 | CE08369 | WBGene00007706 | WP:CE08369
UTGB	GTSSWE201565.07	outron	C25A1.5	C25A1.5	chrI	10175493	+	139	1.657	1685	1677	C25A1.5 | C25A1.5.1 | C25A1.5.2 | CE08370 | WBGene00007707 | WP:CE08370
UTGB	GTSSWE201567.01	exon	C25A1.7.1	C25A1.7.1	chrI	10179902	+	10	0	336	-1	C25A1.7 | C25A1.7.1 | C25A1.7.2 | C25A1.7.3 | C25A1.7a | C25A1.7b | C25A1.7b.1 | C25A1.7b.2 | CE08373 | CE45396 | WBGene00002153 | WP:CE08373 | WP:CE45396 | iars-2 | irs-2
UTGB	GTSSWE201569.01	exon	rsa-1	C25A1.9a	chrI	10184632	+	249	0	1235	-1	C25A1.9 | C25A1.9a | C25A1.9b | CE08375 | CE18532 | WBGene00007710 | WP:CE08375 | WP:CE18532 | rsa-1
UTGB	GTSSWE201570.04	outron	dao-5	C25A1.10a	chrI	10190999	-	356	14.8	129	113	C25A1.10 | C25A1.10a | C25A1.10b | CE08376 | CE38279 | WBGene00000931 | WP:CE08376 | WP:CE38279 | dao-5
UTGB	GTSSWE201571.06	outron	C25A1.12	C25A1.12	chrI	10193045	-	45	0.4981	223	223	C25A1.12 | CE41871 | WBGene00007711 | WP:CE41871
UTGB	GTSSWE201572.02	outron	C25A1.13	C25A1.13	chrI	10190398	+	94	0	2833	2833	C25A1.13 | CE08379 | WBGene00007712 | WP:CE08379
UTGB	GTSSWE201573.11	outron	aha-1	C25A1.11	chrI	10197174	-	60	0.4824	194	193	C25A1.11 | C25A1.11a | C25A1.11b | CE08377 | CE44231 | WBGene00000095 | WP:CE08377 | WP:CE44231 | aha-1
UTGB	GTSSWE201574.01	exon	C25A1.15	C25A1.15	chrI	10194325	+	10	0	2985	-1	C25A1.15 | CE08381 | WBGene00007713 | WP:CE08381
UTGB	GTSSWE201575.39	outron	ced-12	Y106G6E.5.1	chrI	10227339	-	230	6.169	377	377	CE27228 | WBGene00000426 | WP:CE27228 | Y106G6E.5 | Y106G6E.5.1 | Y106G6E.5.2 | ced-12 | mig-16
UTGB	GTSSWE201577.01	exon	lin-11	ZC247.3	chrI	10248291	+	59	1.774	38	-1	CE15150 | WBGene00003000 | WP:CE15150 | ZC247.3 | lin-11
UTGB	GTSSWE201578.04	outron	ZC247.2	ZC247.2	chrI	10262196	-	160	0.4904	102	92	CE15148 | WBGene00013860 | WP:CE15148 | ZC247.2
UTGB	GTSSWE201579.02	outron	ZC247.1	ZC247.1	chrI	10281582	-	36	0	2357	2352	CE43614 | WBGene00013859 | WP:CE43614 | ZC247.1
UTGB	GTSSWE201580.09	exon	wts-1	T20F10.1	chrI	10297879	-	189	0.5021	42	-1	CE13844 | T20F10.1 | WBGene00007047 | WP:CE13844 | tag-181 | wts-1
UTGB	GTSSWE201581.08	exon	T20F10.2	T20F10.2a	chrI	10298276	+	108	0	23	-1	CE13846 | CE21191 | CE40125 | T20F10.2 | T20F10.2a | T20F10.2b | T20F10.2c | WBGene00011864 | WP:CE13846 | WP:CE21191 | WP:CE40125
UTGB	GTSSWE201582.01	exon	Y106G6G.6	Y106G6G.6	chrI	10321584	-	28	0	100	-1	CE35194 | WBGene00013715 | WP:CE35194 | Y106G6G.6
UTGB	GTSSWE201583.02	outron	Y106G6G.4	Y106G6G.4	chrI	10323503	-	13	0	260	158	CE23214 | WBGene00013713 | WP:CE23214 | Y106G6G.4
UTGB	GTSSWE201584.05	exon	Y106G6G.2	Y106G6G.2	chrI	10327774	-	161	3.076	26	-1	CE35193 | WBGene00013711 | WP:CE35193 | Y106G6G.2
UTGB	GTSSWE201585.01	exon	Y106G6G.1	Y106G6G.1	chrI	10328841	+	10	0	186	-1	CE23211 | WBGene00013710 | WP:CE23211 | Y106G6G.1
UTGB	GTSSWE201586.01	outron	rps-7	ZC434.2.1	chrI	10330646	+	282	0.7639	233	223	CE06577 | WBGene00004476 | WP:CE06577 | ZC434.2 | ZC434.2.1 | ZC434.2.2 | rps-7
UTGB	GTSSWE201587.06	outron	ZC434.4	ZC434.4	chrI	10333095	-	35	19.52	45	42	CE38014 | WBGene00013892 | WP:CE38014 | ZC434.4 | ZC434.4.1 | ZC434.4.2
UTGB	GTSSWE201588.02	exon	ZC434.3	ZC434.3	chrI	10335736	-	109	0.5748	39	-1	CE06578 | WBGene00013891 | WP:CE06578 | ZC434.3
UTGB	GTSSWE201590.02	outron	aph-2	ZC434.6b	chrI	10340915	+	27	0	104	75	CE15229 | CE34446 | WBGene00000148 | WP:CE15229 | WP:CE34446 | ZC434.6 | ZC434.6a | ZC434.6b | aph-2
UTGB	GTSSWE201593.04	exon	sptf-1	F45H11.1b	chrI	10365929	+	30	0	682	-1	CE16055 | CE38353 | F45H11.1 | F45H11.1a | F45H11.1b | WBGene00009743 | WP:CE16055 | WP:CE38353 | sptf-1
UTGB	GTSSWE201594.05	outron	ned-8	F45H11.2	chrI	10374281	-	290	1.674	431	428	CE10552 | F45H11.2 | WBGene00003587 | WP:CE10552 | ned-8
UTGB	GTSSWE201595.03	outron	F45H11.3b	F45H11.3b	chrI	10374408	+	43	0	396	391	F45H11.3a | F45H11.3b
UTGB	GTSSWE201596.01	outron	F45H11.5	F45H11.5	chrI	10380751	+	30	5.721	321	321	CE27165 | F45H11.5 | WBGene00009745 | WP:CE27165
UTGB	GTSSWE201597.01	outron	mgl-2	F45H11.4	chrI	10392905	-	23	0	1598	1526	CE42117 | CE42118 | F45H11.4 | F45H11.4.1 | F45H11.4.2 | F45H11.6 | WBGene00003233 | WBGene00077521 | WP:CE42117 | WP:CE42118 | mgl-2
UTGB	GTSSWE201598.09	outron	cup-2	F25D7.1.1	chrI	10400191	-	48	0	23	23	CE09629 | F25D7.1 | F25D7.1.1 | F25D7.1.2 | WBGene00000843 | WP:CE09629 | cup-2 | tag-352
UTGB	GTSSWE201599.02	outron	tag-353	F25D7.2	chrI	10399791	+	406	1.626	1270	1266	CE40045 | F25D7.2 | WBGene00009112 | WP:CE40045 | tag-353
UTGB	GTSSWE201601.03	exon	F25D7.5	F25D7.5	chrI	10429597	-	34	1.125	580	-1	CE42001 | F25D7.5 | WBGene00009114 | WP:CE42001
UTGB	GTSSWE201602.02	exon	Y106G6H.1	Y106G6H.1	chrI	10429675	+	89	0	56	-1	CE20411 | WBGene00013716 | WP:CE20411 | Y106G6H.1
UTGB	GTSSWE201603.17	outron	pab-1	Y106G6H.2b	chrI	10435411	-	2873	1.832	189	182	CE20412 | CE36227 | CE36228 | WBGene00003902 | WP:CE20412 | WP:CE36227 | WP:CE36228 | Y106G6H.2 | Y106G6H.2a | Y106G6H.2a.1 | Y106G6H.2a.2 | Y106G6H.2a.3 | Y106G6H.2a.4 | Y106G6H.2a.5 | Y106G6H.2b | Y106G6H.2b.1 | Y106G6H.2b.2 | Y106G6H.2c | pab-1
UTGB	GTSSWE201604.13	outron	rpl-30	Y106G6H.3	chrI	10435902	+	1551	0.3826	352	342	CE44850 | WBGene00004444 | WP:CE44850 | Y106G6H.3 | Y106G6H.3.1 | Y106G6H.3.2 | rpl-30
UTGB	GTSSWE201605.01	outron	Y106G6H.4	Y106G6H.4	chrI	10438247	-	96	12.59	547	536	CE20414 | WBGene00013717 | WP:CE20414 | Y106G6H.4
UTGB	GTSSWE201606.01	outron	Y106G6H.5	Y106G6H.5.1	chrI	10443834	-	44	0.7185	297	279	CE32511 | WBGene00013718 | WP:CE32511 | Y106G6H.5 | Y106G6H.5.1 | Y106G6H.5.2
UTGB	GTSSWE201608.08	outron	sec-8	Y106G6H.7	chrI	10446617	+	73	0.658	51	37	CE32512 | WBGene00004753 | WP:CE32512 | Y106G6H.7 | sec-8
UTGB	GTSSWE201609.01	outron	Y106G6H.8	Y106G6H.8	chrI	10452092	+	79	7.319	81	77	CE41279 | WBGene00013720 | WP:CE41279 | Y106G6H.8
UTGB	GTSSWE201610.02	exon	Y106G6H.9	Y106G6H.9	chrI	10456957	-	16	0	1333	-1	CE20419 | WBGene00013721 | WP:CE20419 | Y106G6H.9
UTGB	GTSSWE201612.01	outron	Y106G6H.13	Y106G6H.13	chrI	10470123	+	10	0	1379	1369	CE20422 | WBGene00013723 | WP:CE20422 | Y106G6H.13
UTGB	GTSSWE201613.01	outron	Y106G6H.14	Y106G6H.14	chrI	10473466	-	13	0	86	85	CE24111 | WBGene00013724 | WP:CE24111 | Y106G6H.14
UTGB	GTSSWE201614.05	outron	Y106G6H.15	Y106G6H.15	chrI	10474743	-	150	0.8952	317	316	CE20424 | WBGene00013725 | WP:CE20424 | Y106G6H.15
UTGB	GTSSWE201615.01	exon	Y106G6H.16	Y106G6H.16	chrI	10474846	+	77	17.7	58	-1	CE23216 | WBGene00013726 | WP:CE23216 | Y106G6H.16
UTGB	GTSSWE201616.06	outron	F37D6.2	F37D6.2c.1	chrI	10479108	-	153	0	1021	998	CE05819 | CE29592 | CE40957 | F37D6.2 | F37D6.2a | F37D6.2a.1 | F37D6.2a.2 | F37D6.2b | F37D6.2c | F37D6.2c.1 | F37D6.2c.2 | WBGene00009508 | WP:CE05819 | WP:CE29592 | WP:CE40957
UTGB	GTSSWE201617.02	exon	mus-101	F37D6.1	chrI	10486095	-	17	0	456	-1	CE42802 | F37D6.1 | WBGene00009507 | WP:CE42802 | mus-101
UTGB	GTSSWE201618.07	outron	F37D6.3	F37D6.3	chrI	10486366	+	30	0	339	326	CE05820 | F37D6.3 | WBGene00009509 | WP:CE05820
UTGB	GTSSWE201620.04	outron	tag-68	F37D6.6	chrI	10501461	+	19	0	269	115	CE36156 | F37D6.6 | WBGene00006445 | WP:CE36156 | tag-68
UTGB	GTSSWE201622.03	outron	F59C6.8	F59C6.8	chrI	10508971	+	66	19.35	110	51	CE37526 | F59C6.8 | WBGene00010327 | WP:CE37526
UTGB	GTSSWE201621.02	exon	che-13	F59C6.7	chrI	10515518	-	376	7.092	22	-1	CE31704 | F59C6.7 | WBGene00000492 | WP:CE31704 | che-13 | che-9
UTGB	GTSSWE201623.03	exon	nlp-4	F59C6.6	chrI	10518034	-	65	0.4632	303	-1	CE11466 | F59C6.6 | F59C6.6.1 | F59C6.6.2 | WBGene00003742 | WP:CE11466 | nlp-4
UTGB	GTSSWE201624.05	outron	exos-3	F59C6.4.1	chrI	10518160	+	146	4.601	210	208	CE11462 | F59C6.4 | F59C6.4.1 | F59C6.4.2 | WBGene00010325 | WP:CE11462 | exos-3
UTGB	GTSSWE201625.03	outron	F59C6.5	F59C6.5.1	chrI	10519293	+	25	0.8744	57	56	CE11464 | F59C6.5 | F59C6.5.1 | F59C6.5.2 | WBGene00010326 | WP:CE11464
UTGB	GTSSWE201626.01	outron	F59C6.12	F59C6.12	chrI	10520750	+	21	0	110	102	CE38380 | F59C6.12 | WBGene00044251 | WP:CE38380
UTGB	GTSSWE201627.01	outron	F59C6.14	F59C6.14a	chrI	10526543	+	27	1.922	56	50	CE42127 | CE42128 | F59C6.14 | F59C6.14a | F59C6.14b | WBGene00044792 | WP:CE42127 | WP:CE42128
UTGB	GTSSWE201628.12	outron	F59C6.11	F59C6.11	chrI	10532758	+	26	0.8493	30	19	CE27178 | F59C6.11 | WBGene00010328 | WP:CE27178
UTGB	GTSSWE201629.02	outron	tli-1	F25H2.1	chrI	10538216	-	20	1.754	179	144	CE42833 | F25H2.1 | WBGene00006578 | WP:CE42833 | tli-1
UTGB	GTSSWE201630.11	outron	F25H2.2	F25H2.2	chrI	10541712	+	36	0.5526	1303	1301	CE09647 | F25H2.2 | WBGene00009116 | WP:CE09647
UTGB	GTSSWE201631.03	exon	F25H2.3	F25H2.3	chrI	10546479	+	29	0	1207	-1	CE42100 | F25H2.3 | WBGene00009117 | WP:CE42100
UTGB	GTSSWE201632.06	outron	F25H2.4	F25H2.4	chrI	10551682	+	47	1.576	286	286	CE09649 | F25H2.4 | WBGene00009118 | WP:CE09649
UTGB	GTSSWE201633.07	exon	F25H2.5	F25H2.5.1	chrI	10553844	-	5643	1.242	60	-1	CE09650 | F25H2.5 | F25H2.5.1 | F25H2.5.2 | F25H2.5.3 | WBGene00009119 | WP:CE09650
UTGB	GTSSWE201636.26	outron	ubc-25	F25H2.8.1	chrI	10562167	+	86	3.432	812	792	CE34543 | F25H2.8 | F25H2.8.1 | F25H2.8.2 | WBGene00006720 | WP:CE34543 | ubc-25
UTGB	GTSSWE201637.18	outron	pas-5	F25H2.9	chrI	10564656	+	112	8.066	1689	1683	CE09654 | F25H2.9 | F25H2.9.1 | F25H2.9.2 | WBGene00003926 | WP:CE09654 | pas-5 | syt-2
UTGB	GTSSWE201639.01	outron	tct-1	F25H2.11.1	chrI	10568963	+	30	0	160	138	CE09656 | F25H2.11 | F25H2.11.1 | F25H2.11.2 | WBGene00009122 | WP:CE09656 | tct-1
UTGB	GTSSWE201640.03	outron	F25H2.12	F25H2.12a	chrI	10569979	+	23	0	93	89	CE09657 | CE32637 | F25H2.12 | F25H2.12a | F25H2.12a.1 | F25H2.12a.2 | F25H2.12b | WBGene00009123 | WP:CE09657 | WP:CE32637
UTGB	GTSSWE201641.01	outron	rtel-1	F25H2.13	chrI	10571940	+	34	0	79	78	CE15894 | F25H2.13 | F25H2.13.1 | F25H2.13.2 | WBGene00009124 | WP:CE15894 | bch-1 | rtel-1
UTGB	GTSSWE201642.01	outron	F29C6.1	F29C6.1a	chrI	10577363	+	64	0	2045	2039	CE13912 | CE40049 | F29C6.1 | F29C6.1a | F29C6.1a.1 | F29C6.1a.2 | F29C6.1b | F29C6.1b.1 | F29C6.1b.2 | F29C6.1b.3 | WBGene00009243 | WP:CE13912 | WP:CE40049
UTGB	GTSSWE201643.10	outron	hsp-12.1	T22A3.2b	chrI	10583022	-	244	8.69	424	423	CE13914 | CE40519 | T22A3.2 | T22A3.2a | T22A3.2b | WBGene00011906 | WP:CE13914 | WP:CE40519 | hsp-12.1
UTGB	GTSSWE201644.22	exon	lst-1	T22A3.3a	chrI	10586327	+	32	1.468	1964	-1	CE38420 | CE38421 | T22A3.3 | T22A3.3a | T22A3.3b | T22A3.3b.1 | T22A3.3b.2 | T22A3.3b.3 | T22A3.3b.4 | T22A3.3b.5 | T22A3.3b.6 | WBGene00003083 | WP:CE38420 | WP:CE38421 | lst-1
UTGB	GTSSWE201645.24	exon	set-18	T22A3.4b	chrI	10590751	+	210	0.3834	51	-1	CE13918 | CE32497 | T22A3.4 | T22A3.4a | T22A3.4b | WBGene00044070 | WP:CE13918 | WP:CE32497 | set-18 | tag-237
UTGB	GTSSWE201646.06	outron	pash-1	T22A3.5	chrI	10598662	+	116	1.464	37	33	CE18957 | T22A3.5 | WBGene00011908 | WP:CE18957 | pash-1
UTGB	GTSSWE201648.08	outron	C43H8.2	C43H8.2	chrI	10622944	+	72	0	223	218	C43H8.2 | CE19378 | WBGene00016622 | WP:CE19378
UTGB	GTSSWE201649.04	outron	C43H8.1	C43H8.1	chrI	10624157	+	25	0	303	296	C43H8.1 | C43H8.1.1 | C43H8.1.2 | CE19377 | WBGene00016621 | WP:CE19377
UTGB	GTSSWE201650.02	exon	cutl-14	B0511.5	chrI	10628611	+	19	0	195	-1	B0511.5 | CE41859 | WBGene00015231 | WP:CE41859 | cutl-14
UTGB	GTSSWE201651.02	outron	B0511.7	B0511.7	chrI	10633202	-	127	12.05	65	62	B0511.7 | CE34246 | WBGene00015233 | WP:CE34246
UTGB	GTSSWE201652.10	outron	B0511.13	B0511.13	chrI	10636069	-	41	0.5318	73	51	B0511.13 | CE32106 | WBGene00015238 | WP:CE32106
UTGB	GTSSWE201653.01	outron	tag-264	B0511.8.1	chrI	10639379	-	28	0.6006	433	423	B0511.8 | B0511.8.1 | B0511.8.2 | CE28880 | WBGene00044321 | WP:CE28880 | tag-264
UTGB	GTSSWE201654.06	outron	cdc-26	B0511.9b	chrI	10640666	-	36	3.376	449	448	B0511.9 | B0511.9a | B0511.9b | B0511.9c | CE26854 | CE41861 | CE44875 | WBGene00015235 | WP:CE26854 | WP:CE41861 | WP:CE44875 | cdc-26 | mat-4 | tag-265
UTGB	GTSSWE201655.03	outron	eif-3.E	B0511.10	chrI	10642379	-	120	0.5209	114	108	B0511.10 | B0511.10.1 | B0511.10.2 | CE17349 | WBGene00001228 | WP:CE17349 | eif-3.E
UTGB	GTSSWE201656.02	exon	tag-344	B0511.4	chrI	10642866	+	18	0	1407	-1	B0511.4 | CE17343 | WBGene00015230 | WP:CE17343 | tag-344
UTGB	GTSSWE201657.01	exon	B0511.11	B0511.11	chrI	10651339	-	37	1.855	1175	-1	B0511.11 | CE43974 | WBGene00015236 | WP:CE43974
UTGB	GTSSWE201658.01	exon	B0511.12	B0511.12	chrI	10661917	-	37	0.6664	325	-1	B0511.12 | CE28877 | WBGene00015237 | WP:CE28877
UTGB	GTSSWE201660.05	exon	fkb-7	B0511.1	chrI	10667896	+	449	1.354	52	-1	B0511.1 | CE26851 | WBGene00001432 | WP:CE26851 | fkb-7
UTGB	GTSSWE201661.02	exon	C34B2.3	C34B2.3	chrI	10671082	+	26	4.339	1720	-1	C34B2.3 | CE34266 | WBGene00016388 | WP:CE34266
UTGB	GTSSWE201662.01	outron	C34B2.5	C34B2.5	chrI	10676880	-	15	0	87	85	C34B2.5 | C34B2.5.1 | C34B2.5.2 | CE16893 | WBGene00016390 | WP:CE16893
UTGB	GTSSWE201663.03	outron	C34B2.6	C34B2.6	chrI	10682529	-	22	0	167	165	C34B2.6 | C34B2.6.1 | C34B2.6.2 | CE16894 | WBGene00016391 | WP:CE16894
UTGB	GTSSWE201664.07	outron	C34B2.10.1	C34B2.10.1	chrI	10683134	-	603	0.4224	104	96	C34B2.10 | C34B2.10.1 | C34B2.10.2 | CE16898 | WBGene00016395 | WP:CE16898 | phi-56
UTGB	GTSSWE201665.03	outron	sdha-2	C34B2.7.1	chrI	10685629	-	444	13.23	56	52	C34B2.7 | C34B2.7.1 | C34B2.7.2 | CE16895 | WBGene00016392 | WP:CE16895 | sdha-2
UTGB	GTSSWE201666.02	outron	C34B2.8	C34B2.8	chrI	10687138	-	256	4.731	95	90	C34B2.8 | CE16896 | WBGene00016393 | WP:CE16896
UTGB	GTSSWE201667.04	outron	kbp-5	C34B2.2	chrI	10687263	+	108	0.9541	96	89	C34B2.2 | CE16890 | WBGene00016387 | WP:CE16890 | kbp-5
UTGB	GTSSWE201668.01	exon	tag-272	C34B2.1	chrI	10687922	+	36	6.555	399	-1	C34B2.1 | CE36631 | WBGene00016386 | WP:CE36631 | tag-272
UTGB	GTSSWE201669.01	exon	C34B2.11	C34B2.11	chrI	10691053	+	20	0	314	-1	C34B2.11 | CE29210 | WBGene00016396 | WP:CE29210
UTGB	GTSSWE201670.04	outron	C34B2.9	C34B2.9	chrI	10705000	-	32	0	1210	1209	C34B2.9 | CE27816 | WBGene00016394 | WP:CE27816
UTGB	GTSSWE201671.02	outron	B0205.1	B0205.1b	chrI	10717248	-	22	1.162	274	263	B0205.1 | B0205.1a | B0205.1b | B0205.1b.1 | B0205.1b.2 | CE34238 | CE36908 | WBGene00015017 | WP:CE34238 | WP:CE36908
UTGB	GTSSWE201672.07	outron	B0205.9	B0205.9	chrI	10720478	+	36	0	337	326	B0205.9 | CE17323 | WBGene00015023 | WP:CE17323
UTGB	GTSSWE201673.01	exon	B0205.13	B0205.13	chrI	10728946	-	25	0	234	-1	B0205.13 | CE39199 | WBGene00044644 | WP:CE39199
UTGB	GTSSWE201674.08	outron	B0205.8	B0205.8	chrI	10730240	-	369	0.9569	32	17	B0205.8 | CE17322 | WBGene00015022 | WP:CE17322
UTGB	GTSSWE201675.01	outron	B0205.12	B0205.12	chrI	10730316	+	16	0.7777	148	142	B0205.12 | CE38674 | WBGene00044413 | WP:CE38674
UTGB	GTSSWE201676.02	outron	rpn-10	B0205.3.1	chrI	10732446	-	25	0	65	32	B0205.3 | B0205.3.1 | B0205.3.2 | CE26355 | WBGene00004466 | WP:CE26355 | mcb-1 | rpn-10
UTGB	GTSSWE201677.02	outron	B0205.11	B0205.11	chrI	10733725	-	313	2.133	77	71	B0205.11 | CE39542 | WBGene00015025 | WP:CE39542
UTGB	GTSSWE201678.05	outron	kin-3	B0205.7	chrI	10733846	+	149	0.8864	182	165	B0205.7 | CE17321 | WBGene00002191 | WP:CE17321 | kin-3
UTGB	GTSSWE201679.06	outron	B0205.6	B0205.6	chrI	10736333	+	61	14.08	405	353	B0205.6 | CE30405 | WBGene00015021 | WP:CE30405
UTGB	GTSSWE201680.05	exon	B0205.4	B0205.4	chrI	10744355	-	18	1.25	16	-1	B0205.4 | CE39201 | WBGene00015019 | WP:CE39201
UTGB	GTSSWE201681.01	exon	F55A3.5	F55A3.5	chrI	10783096	-	13	0	216	-1	CE17114 | F55A3.5 | WBGene00018850 | WP:CE17114
UTGB	GTSSWE201682.01	exon	F55A3.7	F55A3.7	chrI	10788756	-	20	0	903	-1	CE32191 | F55A3.7 | WBGene00018852 | WP:CE32191
UTGB	GTSSWE201683.02	outron	F55A3.3	F55A3.3	chrI	10788869	+	97	1.343	257	250	CE17113 | F55A3.3 | F55A3.3.1 | F55A3.3.2 | WBGene00018849 | WP:CE17113 | phi-16
UTGB	GTSSWE201684.01	outron	F55A3.2	F55A3.2	chrI	10792924	+	47	13.68	657	466	CE17112 | F55A3.2 | WBGene00018848 | WP:CE17112
UTGB	GTSSWE201685.05	outron	2013-03-06	F55A3.1	chrI	10798779	+	64	0.5736	847	833	CE37022 | F55A3.1 | WBGene00018847 | WP:CE37022 | marc-6
UTGB	GTSSWE201686.01	exon	C35E7.9	C35E7.9	chrI	10806393	+	29	2.161	660	-1	C35E7.9 | CE17522 | WBGene00016461 | WP:CE17522
UTGB	GTSSWE201687.05	exon	C35E7.10	C35E7.10a	chrI	10812854	-	24	0	91	-1	C35E7.10 | C35E7.10a | C35E7.10b | CE17523 | CE17524 | WBGene00016462 | WP:CE17523 | WP:CE17524
UTGB	GTSSWE201688.01	outron	C35E7.6	C35E7.6	chrI	10815445	+	140	6.233	1904	1898	C35E7.6 | CE17519 | WBGene00016458 | WP:CE17519
UTGB	GTSSWE201691.05	outron	C35E7.3	C35E7.3	chrI	10836881	+	24	0	94	93	C35E7.3 | CE17516 | WBGene00016455 | WP:CE17516
UTGB	GTSSWE201692.03	outron	C35E7.2	C35E7.2a	chrI	10840090	+	267	0	1020	1013	C35E7.2 | C35E7.2a | C35E7.2b | CE29215 | CE29216 | WBGene00016454 | WP:CE29215 | WP:CE29216
UTGB	GTSSWE201693.01	outron	C35E7.11	C35E7.11	chrI	10844437	+	18	0	340	324	C35E7.11 | C35E7.11.1 | C35E7.11.2 | CE27830 | WBGene00016463 | WP:CE27830
UTGB	GTSSWE201694.03	outron	vet-2	C35E7.1	chrI	10846344	+	645	0.7077	445	424	C35E7.1 | CE36273 | WBGene00016453 | WP:CE36273 | vet-2
UTGB	GTSSWE201695.01	exon	Y37F4.1	Y37F4.1	chrI	10858266	+	20	0	1275	-1	CE40824 | WBGene00021382 | WP:CE40824 | Y37F4.1
UTGB	GTSSWE201696.01	exon	Y37F4.7	Y37F4.7	chrI	10866683	-	22	9.835	2354	-1	CE36033 | WBGene00021388 | WP:CE36033 | Y37F4.7
UTGB	GTSSWE201697.01	exon	Y37F4.6	Y37F4.6	chrI	10875179	-	96	1.448	1182	-1	CE38566 | WBGene00021387 | WP:CE38566 | Y37F4.6 | Y37F4.6.1 | Y37F4.6.2
UTGB	GTSSWE201698.03	outron	nspd-10	T27C10.7	chrI	10879937	-	32	2.254	1617	1567	CE32941 | T27C10.7 | WBGene00020860 | WP:CE32941 | nspd-10
UTGB	GTSSWE201700.02	exon	T27C10.8	T27C10.8	chrI	10882660	+	49	0	943	-1	CE42175 | T27C10.8 | WBGene00077519 | WP:CE42175
UTGB	GTSSWE201701.02	exon	mop-25.3	T27C10.3	chrI	10887936	+	31	0	2054	-1	CE19605 | T27C10.3 | WBGene00020858 | WP:CE19605 | mop-25.3
UTGB	GTSSWE201699.05	outron	lrk-1	T27C10.6	chrI	10894429	-	23	0	210	198	CE41939 | T27C10.6 | WBGene00003068 | WP:CE41939 | lrk-1
UTGB	GTSSWE201702.02	exon	F49D11.6	F49D11.6	chrI	10910628	-	21	0	1546	-1	CE44140 | F49D11.6 | WBGene00018630 | WP:CE44140
UTGB	GTSSWE201703.02	outron	F49D11.4	F49D11.4	chrI	10912361	+	34	1.532	829	547	CE44012 | F49D11.4 | WBGene00018628 | WP:CE44012
UTGB	GTSSWE201704.01	outron	cpn-4	F49D11.8	chrI	10927054	-	25	6.977	1314	1309	CE17082 | F49D11.8 | WBGene00000780 | WP:CE17082 | cpn-4
UTGB	GTSSWE201705.04	outron	F49D11.10	F49D11.10.1	chrI	10934037	-	42	8.247	340	340	CE44000 | F49D11.10 | F49D11.10.1 | F49D11.10.2 | WBGene00045433 | WP:CE44000
UTGB	GTSSWE201706.01	exon	tag-296	F49D11.9	chrI	10935838	-	13	0	132	-1	CE41134 | F49D11.9 | WBGene00018632 | WP:CE41134 | tag-296
UTGB	GTSSWE201708.06	outron	Y95D11A.3	Y95D11A.3	chrI	10940644	+	22	0	34	34	CE41188 | WBGene00045434 | WP:CE41188 | Y95D11A.3
UTGB	GTSSWE201709.05	outron	Y95D11A.1	Y95D11A.1	chrI	10944137	+	27	4.232	66	66	CE23166 | WBGene00013605 | WP:CE23166 | Y95D11A.1
UTGB	GTSSWE201710.01	exon	spe-38	Y52B11A.1	chrI	10966382	-	19	0	75	-1	CE34228 | WBGene00013121 | WP:CE34228 | Y52B11A.1 | spe-38
UTGB	GTSSWE201711.03	outron	Y52B11A.2	Y52B11A.2a	chrI	10970234	-	372	0.442	74	69	CE20291 | CE36243 | WBGene00013122 | WP:CE20291 | WP:CE36243 | Y52B11A.2 | Y52B11A.2a | Y52B11A.2b
UTGB	GTSSWE201712.05	exon	clec-92	Y52B11A.5	chrI	11012976	+	447	2.992	2503	-1	CE20294 | WBGene00013125 | WP:CE20294 | Y52B11A.5 | clec-92
UTGB	GTSSWE201713.02	outron	Y52B11A.9	Y52B11A.9	chrI	11038879	-	45	0	66	58	CE20297 | WBGene00013128 | WP:CE20297 | Y52B11A.9
UTGB	GTSSWE201714.01	outron	Y52B11A.10	Y52B11A.10	chrI	11036932	+	116	0	2123	2117	CE20298 | WBGene00013129 | WP:CE20298 | Y52B11A.10
UTGB	GTSSWE201716.01	outron	Y52B11B.1	Y52B11B.1	chrI	11121109	+	28	0	2645	2626	CE19220 | WBGene00013130 | WP:CE19220 | Y52B11B.1
UTGB	GTSSWE201715.01	outron	hmr-1	W02B9.1b	chrI	11137541	-	74	0.4461	2988	2880	CE25133 | CE30357 | CE42574 | W02B9.1 | W02B9.1a | W02B9.1b | W02B9.1b.1 | W02B9.1b.2 | W02B9.1c | WBGene00001980 | WP:CE25133 | WP:CE30357 | WP:CE42574 | hmr-1
UTGB	GTSSWE201717.01	outron	rsr-1	F28D9.1	chrI	11182450	-	221	12.44	395	394	CE30346 | CeSRm160 | F28D9.1 | WBGene00004706 | WP:CE30346 | rsr-1
UTGB	GTSSWE201718.01	exon	sri-5	F28D9.2b	chrI	11180382	+	62	0	2427	-1	CE34482 | CE34483 | F28D9.2 | F28D9.2a | F28D9.2b | WBGene00005517 | WP:CE34482 | WP:CE34483 | sri-5
UTGB	GTSSWE201720.02	outron	ins-36	Y53H1A.4	chrI	11215381	-	24	0	297	296	CE36041 | WBGene00002119 | WP:CE36041 | Y53H1A.4 | ins-36
UTGB	GTSSWE201721.02	outron	rsy-1	Y53H1A.1a	chrI	11222101	-	22	0	133	113	CE42773 | CE42806 | WBGene00013177 | WP:CE42773 | WP:CE42806 | Y53H1A.1 | Y53H1A.1a | Y53H1A.1b | rsy-1
UTGB	GTSSWE201722.01	outron	Y53H1A.2	Y53H1A.2b	chrI	11222221	+	129	6.239	170	97	CE42483 | CE42547 | WBGene00013178 | WP:CE42483 | WP:CE42547 | Y53H1A.2 | Y53H1A.2a | Y53H1A.2a.1 | Y53H1A.2a.2 | Y53H1A.2b | Y53H1A.2c
UTGB	GTSSWE201723.04	outron	nfya-2	Y53H1A.5	chrI	11224188	+	36	2.889	690	640	CE41285 | WBGene00043056 | WP:CE41285 | Y53H1A.5 | nfya-2
UTGB	GTSSWE201724.01	exon	scrm-6	F46A8.10	chrI	11251075	+	19	0	2267	-1	CE34186 | F46A8.10 | WBGene00009753 | WP:CE34186 | scrm-6
UTGB	GTSSWE201725.01	exon	F36D1.6	F36D1.6	chrI	11273375	-	20	0	2156	-1	CE34306 | F36D1.6 | WBGene00009465 | WP:CE34306
UTGB	GTSSWE201726.05	outron	F36D1.1	F36D1.1	chrI	11280069	-	34	0	62	58	CE19832 | F36D1.1 | WBGene00009461 | WP:CE19832
UTGB	GTSSWE201727.01	exon	Y53H1B.2	Y53H1B.2	chrI	11294473	-	16	0	328	-1	CE24431 | WBGene00013181 | WP:CE24431 | Y53H1B.2
UTGB	GTSSWE201728.02	exon	cutl-10	Y53H1B.1	chrI	11297185	-	47	0.9857	25	-1	CE22434 | WBGene00013180 | WP:CE22434 | Y53H1B.1 | cutl-10
UTGB	GTSSWE201729.04	exon	Y53H1B.4	Y53H1B.4	chrI	11298394	+	77	0	2341	-1	CE22435 | WBGene00013182 | WP:CE22435 | Y53H1B.4
UTGB	GTSSWE201730.05	exon	H25P06.4	H25P06.4	chrI	11311701	-	80	13.26	2108	-1	CE43214 | H25P06.4 | WBGene00010417 | WP:CE43214
UTGB	GTSSWE201731.05	outron	H25P06.1	H25P06.1.1	chrI	11323323	-	135	0.5958	238	220	CE18823 | H25P06.1 | H25P06.1.1 | H25P06.1.2 | WBGene00010416 | WP:CE18823
UTGB	GTSSWE201732.01	outron	cdk-9	H25P06.2b	chrI	11323426	+	33	2.221	98	93	CE37838 | CE37839 | H25P06.2 | H25P06.2a | H25P06.2b | WBGene00000410 | WP:CE37838 | WP:CE37839 | cdk-9
UTGB	GTSSWE201733.06	exon	pes-2.1	F56G4.2	chrI	11354638	+	1157	0.3129	590	-1	CE18757 | F56G4.2 | WBGene00003977 | WP:CE18757 | pes-2.1 | vet-4
UTGB	GTSSWE201734.04	exon	pes-2.2	F56G4.3	chrI	11359874	-	3661	0.5583	580	-1	CE18757 | F56G4.3 | WBGene00010158 | WP:CE18757 | pes-2 | pes-2.2
UTGB	GTSSWE201736.04	outron	F56G4.4	F56G4.4	chrI	11374504	+	38	0.5205	112	110	CE18758 | F56G4.4 | WBGene00010159 | WP:CE18758
UTGB	GTSSWE201737.01	outron	png-1	F56G4.5.1	chrI	11380123	+	25	0	107	100	CE23786 | F56G4.5 | F56G4.5.1 | F56G4.5.2 | F56G4.5.3 | WBGene00010160 | WP:CE23786 | bam-1 | png-1
UTGB	GTSSWE201738.07	outron	aat-9	Y53H1C.1a	chrI	11398183	-	40	0	1533	1531	CE22438 | CE38453 | WBGene00000010 | WP:CE22438 | WP:CE38453 | Y53H1C.1 | Y53H1C.1a | Y53H1C.1b | aat-9
UTGB	GTSSWE201739.03	outron	ego-2	Y53H1C.2a	chrI	11416705	-	51	0.6048	293	286	CE34406 | CE41728 | WBGene00001215 | WP:CE34406 | WP:CE41728 | Y53H1C.2 | Y53H1C.2a | Y53H1C.2b | ego-2
UTGB	GTSSWE201740.01	exon	Y53H1C.3	Y53H1C.3	chrI	11416781	+	25	0	1093	-1	CE28711 | WBGene00013186 | WP:CE28711 | Y53H1C.3
UTGB	GTSSWE201741.01	outron	C27C7.7	C27C7.7	chrI	11421911	+	21	2.159	270	253	C27C7.7 | CE18537 | WBGene00007769 | WP:CE18537
UTGB	GTSSWE201742.01	exon	C27C7.1	C27C7.1	chrI	11437513	+	18	0	1788	-1	C27C7.1 | CE19705 | WBGene00007766 | WP:CE19705
UTGB	GTSSWE201743.01	exon	bah-1	ZK1025.7	chrI	11465148	+	13	0	15	-1	CE19334 | WBGene00050875 | WP:CE19334 | ZK1025.7 | bah-1
UTGB	GTSSWE201744.02	outron	col-65	K08C9.4	chrI	11490586	-	308	0.4022	35	21	CE18860 | K08C9.4 | WBGene00000641 | WP:CE18860 | col-65
UTGB	GTSSWE201745.03	outron	K08C9.7	K08C9.7	chrI	11497022	-	26	0	786	752	CE40707 | K08C9.7 | WBGene00010654 | WP:CE40707
UTGB	GTSSWE201746.01	exon	F32B4.1	F32B4.1	chrI	11509672	+	17	0	385	-1	CE19830 | F32B4.1 | WBGene00009312 | WP:CE19830
UTGB	GTSSWE201747.01	exon	F32B4.2	F32B4.2	chrI	11516665	-	28	0	2860	-1	CE36146 | F32B4.2 | WBGene00009313 | WP:CE36146
UTGB	GTSSWE201749.01	exon	F32B4.5	F32B4.5	chrI	11522503	-	18	0	1851	-1	CE42106 | F32B4.5 | WBGene00009315 | WP:CE42106
UTGB	GTSSWE201748.04	outron	F32B4.4	F32B4.4b.1	chrI	11520740	+	26	0	1240	1083	CE34301 | CE44952 | F32B4.4 | F32B4.4a | F32B4.4b | F32B4.4b.1 | F32B4.4b.2 | WBGene00009314 | WP:CE34301 | WP:CE44952
UTGB	GTSSWE201751.04	exon	F15D3.9	F15D3.9	chrI	11556434	+	30	0	1591	-1	CE40941 | F15D3.9 | WBGene00077557 | WP:CE40941
UTGB	GTSSWE201752.01	exon	F15D3.4	F15D3.4	chrI	11562466	+	14	0	2765	-1	CE19795 | F15D3.4 | WBGene00008854 | WP:CE19795
UTGB	GTSSWE201753.04	exon	F15D3.5	F15D3.5	chrI	11572368	-	41	1.634	1211	-1	CE15852 | F15D3.5 | WBGene00008855 | WP:CE15852
UTGB	GTSSWE201754.06	outron	F15D3.6	F15D3.6	chrI	11577654	-	25	0	204	175	CE15853 | F15D3.6 | F15D3.6.1 | F15D3.6.2 | WBGene00008856 | WP:CE15853
UTGB	GTSSWE201755.04	outron	F15D3.7	F15D3.7	chrI	11578438	+	74	1.05	197	193	CE15854 | F15D3.7 | F15D3.7.1 | F15D3.7.2 | WBGene00008857 | WP:CE15854
UTGB	GTSSWE201756.01	outron	F15D3.8	F15D3.8	chrI	11582272	-	21	0	295	294	CE34479 | F15D3.8 | WBGene00008858 | WP:CE34479
UTGB	GTSSWE201757.01	exon	spe-9	C17D12.6	chrI	11588106	-	44	11.74	2068	-1	C17D12.6 | C17D12.6a | C17D12.6b | CE27074 | CE42755 | WBGene00004963 | WP:CE27074 | WP:CE42755 | spe-9
UTGB	GTSSWE201758.01	exon	C17D12.5	C17D12.5	chrI	11584815	+	24	0	1426	-1	C17D12.5 | CE30492 | WBGene00007639 | WP:CE30492
UTGB	GTSSWE201759.13	outron	unc-75	C17D12.2	chrI	11591141	+	34	1.568	1151	1097	C17D12.2 | CE36103 | WBGene00006807 | WP:CE36103 | unc-75
UTGB	GTSSWE201760.01	outron	C17D12.7	C17D12.7	chrI	11611426	-	25	0	134	121	C17D12.7 | CE23554 | WBGene00007640 | WP:CE23554
UTGB	GTSSWE201761.04	outron	C17D12.1	C17D12.1a	chrI	11609309	+	4832	4.064	2387	2353	C17D12.1 | C17D12.1a | C17D12.1b | C17D12.1b.1 | C17D12.1b.2 | CE19697 | CE20517 | WBGene00007637 | WP:CE19697 | WP:CE20517
UTGB	GTSSWE201762.01	exon	W04G5.5	W04G5.5	chrI	11634570	+	23	0	33	-1	CE44052 | W04G5.5 | WBGene00012266 | WP:CE44052
UTGB	GTSSWE201763.01	exon	W04G5.8	W04G5.8	chrI	11649532	+	22	16.68	440	-1	CE40523 | W04G5.8 | WBGene00012268 | WP:CE40523
UTGB	GTSSWE201765.01	outron	scrm-4	F11A6.2	chrI	11682552	-	12	0	197	190	CE41222 | F11A6.2 | F11A6.2.1 | F11A6.2.2 | WBGene00008681 | WP:CE41222 | plsc-4 | scrm-4
UTGB	GTSSWE201766.04	outron	scrm-1	T22H2.5a.1	chrI	11691002	-	23	0	190	181	CE36204 | CE36205 | T22H2.5 | T22H2.5a | T22H2.5a.1 | T22H2.5a.2 | T22H2.5b | WBGene00011935 | WP:CE36204 | WP:CE36205 | plsc-2 | scrm-1
UTGB	GTSSWE201767.01	exon	T22H2.4	T22H2.4	chrI	11695493	-	138	1.851	505	-1	CE14002 | T22H2.4 | WBGene00011934 | WP:CE14002
UTGB	GTSSWE201768.03	exon	F35E2.8	F35E2.8	chrI	11718891	+	74	0	10	-1	CE17777 | F35E2.8 | WBGene00009415 | WP:CE17777
UTGB	GTSSWE201769.01	exon	F35E2.2	F35E2.2	chrI	11737708	-	28	0	18	-1	CE17772 | F35E2.2 | WBGene00009410 | WP:CE17772
UTGB	GTSSWE201770.01	exon	F35E2.5	F35E2.5	chrI	11746347	-	487	0.8151	2405	-1	CE17774 | F35E2.5 | WBGene00009412 | WP:CE17774
UTGB	GTSSWE201772.01	exon	T02G6.1	T02G6.1	chrI	11798207	-	12	0	284	-1	CE41511 | T02G6.1 | WBGene00011384 | WP:CE41511
UTGB	GTSSWE201773.02	exon	T02G6.2	T02G6.2	chrI	11806924	-	22	0	1942	-1	CE42744 | T02G6.2 | WBGene00011385 | WP:CE42744
UTGB	GTSSWE201774.01	exon	T02G6.4	T02G6.4	chrI	11816936	-	10	0	2072	-1	CE45334 | T02G6.4 | WBGene00011387 | WP:CE45334
UTGB	GTSSWE201775.12	exon	T02G6.5	T02G6.5	chrI	11816236	+	215	0.5574	995	-1	CE42901 | CE45300 | CE45318 | CE45319 | T02G6.5 | T02G6.5a | T02G6.5b | T02G6.5c | T02G6.5d | WBGene00011388 | WP:CE42901 | WP:CE45300 | WP:CE45318 | WP:CE45319
UTGB	GTSSWE201776.03	exon	T02G6.6	T02G6.6	chrI	11819444	+	24	0	85	-1	CE42942 | T02G6.6 | WBGene00011389 | WP:CE42942
UTGB	GTSSWE201777.01	exon	T02G6.7	T02G6.7	chrI	11828703	-	25	0	93	-1	CE18178 | T02G6.7 | WBGene00011390 | WP:CE18178
UTGB	GTSSWE201778.04	outron	ced-1	Y47H9C.4a	chrI	11870644	-	36	0.6746	2554	2548	CE20264 | CE30361 | CE30362 | CE40433 | WBGene00000415 | WP:CE20264 | WP:CE30361 | WP:CE30362 | WP:CE40433 | Y47H9C.4 | Y47H9C.4a | Y47H9C.4b | Y47H9C.4c | Y47H9C.4d | ced-1
UTGB	GTSSWE201779.05	outron	dnj-27	Y47H9C.5a	chrI	11877331	+	84	0	465	462	CE20265 | CE40162 | WBGene00001045 | WP:CE20265 | WP:CE40162 | Y47H9C.5 | Y47H9C.5a | Y47H9C.5b | dnj-27
UTGB	GTSSWE201780.01	exon	Y47H9C.15	Y47H9C.15	chrI	11891693	-	27	0.5445	955	-1	CE28706 | WBGene00012957 | WP:CE28706 | Y47H9C.15
UTGB	GTSSWE201781.02	outron	Y47H9C.7	Y47H9C.7	chrI	11896361	-	24	0	2650	2643	CE20267 | WBGene00012950 | WP:CE20267 | Y47H9C.7 | Y47H9C.7.1 | Y47H9C.7.2
UTGB	GTSSWE201782.02	outron	Y47H9C.8	Y47H9C.8	chrI	11893894	+	431	19.35	95	80	CE20268 | WBGene00012951 | WP:CE20268 | Y47H9C.8
UTGB	GTSSWE201783.01	exon	Y47H9C.12	Y47H9C.12	chrI	11896574	+	13	0	117	-1	CE20272 | WBGene00012955 | WP:CE20272 | Y47H9C.12
UTGB	GTSSWE201784.20	exon	fbxa-216	Y47H9C.10	chrI	11900107	+	41	9.817	1491	-1	CE42193 | WBGene00012953 | WP:CE42193 | Y47H9C.10 | fbxa-216
UTGB	GTSSWE201785.02	outron	R09B3.7	R09B3.7	chrI	11903680	+	16	0	2266	2239	R09B3.7
UTGB	GTSSWE201786.01	outron	exo-3	R09B3.1a	chrI	11909389	-	21	0	192	147	CE16306 | CE38407 | R09B3.1 | R09B3.1a | R09B3.1a.1 | R09B3.1a.2 | R09B3.1a.3 | R09B3.1b | WBGene00001372 | WP:CE16306 | WP:CE38407 | exo-3
UTGB	GTSSWE201787.01	exon	R09B3.2	R09B3.2	chrI	11910011	-	208	1.019	46	-1	CE16307 | R09B3.2 | WBGene00011155 | WP:CE16307
UTGB	GTSSWE201788.09	exon	R09B3.3	R09B3.3	chrI	11910977	-	194	1.188	30	-1	CE16308 | R09B3.3 | WBGene00011156 | WP:CE16308
UTGB	GTSSWE201789.03	outron	ubc-12	R09B3.4	chrI	11911118	+	148	11.32	199	198	CE16309 | R09B3.4 | WBGene00006707 | WP:CE16309 | ubc-12
UTGB	GTSSWE201790.02	outron	mag-1	R09B3.5.2	chrI	11912883	-	218	0	216	215	CE16310 | R09B3.5 | R09B3.5.1 | R09B3.5.2 | WBGene00003123 | WP:CE16310 | mag-1
UTGB	GTSSWE201791.02	outron	hda-3	R06C1.1.1	chrI	11917745	-	19	0	42	42	CE18116 | R06C1.1 | R06C1.1.1 | R06C1.1.2 | WBGene00001836 | WP:CE18116 | hda-3
UTGB	GTSSWE201792.09	outron	fdps-1	R06C1.2	chrI	11924744	-	57	0.9565	845	840	CE23901 | R06C1.2 | WBGene00011058 | WP:CE23901 | fdps-1
UTGB	GTSSWE201793.01	outron	wve-1	R06C1.3	chrI	11930609	-	106	12.45	1111	1109	CE36188 | R06C1.3 | WBGene00006958 | WP:CE36188 | gex-1 | wve-1
UTGB	GTSSWE201795.02	outron	R06C1.6	R06C1.6	chrI	11945498	+	25	0	1507	1493	CE37541 | R06C1.6 | WBGene00011060 | WP:CE37541
UTGB	GTSSWE201796.13	outron	hsf-1	Y53C10A.12.1	chrI	11963049	-	62	19.62	1096	1074	CE22380 | WBGene00002004 | WP:CE22380 | Y53C10A.12 | Y53C10A.12.1 | Y53C10A.12.2 | hsf-1
UTGB	GTSSWE201797.02	exon	Y53C10A.15	Y53C10A.15	chrI	11973350	-	15	0	1562	-1	CE40287 | WBGene00044805 | WP:CE40287 | Y53C10A.15
UTGB	GTSSWE201799.02	outron	Y53C10A.5	Y53C10A.5	chrI	11998166	+	23	0	606	605	CE22373 | WBGene00013136 | WP:CE22373 | Y53C10A.5 | Y53C10A.5.1 | Y53C10A.5.2
UTGB	GTSSWE201800.02	exon	Y53C10A.6	Y53C10A.6a	chrI	12005532	-	26	0.7624	544	-1	CE22374 | CE41062 | WBGene00013137 | WP:CE22374 | WP:CE41062 | Y53C10A.6 | Y53C10A.6a | Y53C10A.6b
UTGB	GTSSWE201801.02	exon	abt-5	Y53C10A.9	chrI	12009225	+	20	0	2041	-1	CE22377 | WBGene00000023 | WP:CE22377 | Y53C10A.9 | abt-5
UTGB	GTSSWE201803.01	outron	F58D5.9	F58D5.9	chrI	12047863	-	34	18.49	1279	1257	CE34893 | F58D5.9 | WBGene00010248 | WP:CE34893
UTGB	GTSSWE201804.17	outron	ksr-2	F58D5.4b	chrI	12060517	-	66	11.79	744	728	CE31017 | CE31018 | CE42786 | F58D5.4 | F58D5.4a | F58D5.4b | F58D5.4c | F58D5.4c.1 | F58D5.4c.2 | F58D5.4c.3 | WBGene00002240 | WP:CE31017 | WP:CE31018 | WP:CE42786 | ksr-2 | pex-1
UTGB	GTSSWE201805.06	outron	F58D5.1.1	F58D5.1.1	chrI	12065310	-	209	1.749	432	422	CE36388 | CE42765 | F58D5.1 | F58D5.1.1 | F58D5.1.2 | F58D5.1a | F58D5.1a.1 | F58D5.1a.2 | F58D5.1a.3 | F58D5.1b | WBGene00002000 | WP:CE36388 | WP:CE42765 | hrp-2
UTGB	GTSSWE201806.02	outron	F58D5.2	F58D5.2a	chrI	12069089	-	309	1.88	438	432	CE34487 | CE34488 | F58D5.2 | F58D5.2a | F58D5.2b | F58D5.2b.1 | F58D5.2b.2 | F58D5.2b.3 | WBGene00010242 | WP:CE34487 | WP:CE34488
UTGB	GTSSWE201808.03	exon	Y47H10A.2	Y47H10A.2	chrI	12087858	-	113	6.331	37	-1	CE34511 | WBGene00012958 | WP:CE34511 | Y47H10A.2
UTGB	GTSSWE201809.01	exon	Y47H10A.3	Y47H10A.3	chrI	12090368	-	24	0	408	-1	CE34512 | WBGene00012959 | WP:CE34512 | Y47H10A.3
UTGB	GTSSWE201810.02	outron	Y47H10A.4	Y47H10A.4	chrI	12094727	-	30	1.845	256	147	CE24377 | WBGene00012960 | WP:CE24377 | Y47H10A.4
UTGB	GTSSWE201811.01	outron	rrf-2	M01G12.12	chrI	12106507	-	35	0	539	529	CE23872 | M01G12.12 | WBGene00004509 | WP:CE23872 | rrf-2
UTGB	GTSSWE201812.01	exon	M01G12.14	M01G12.14	chrI	12109363	-	23	0	954	-1	CE27588 | M01G12.14 | WBGene00010825 | WP:CE27588
UTGB	GTSSWE201813.01	exon	M01G12.9	M01G12.9	chrI	12112480	-	41	0	116	-1	CE44785 | M01G12.9 | WBGene00010822 | WP:CE44785
UTGB	GTSSWE201814.06	outron	R05D7.1	R05D7.1	chrI	12164667	-	94	0.6714	1155	1143	CE32475 | R05D7.1 | WBGene00011026 | WP:CE32475
UTGB	GTSSWE201815.09	exon	R05D7.3	R05D7.3	chrI	12170651	-	35	2.028	204	-1	CE42147 | R05D7.3 | WBGene00011028 | WP:CE42147
UTGB	GTSSWE201816.02	outron	R05D7.4	R05D7.4	chrI	12183200	-	311	9.113	41	17	CE18906 | R05D7.4 | WBGene00011029 | WP:CE18906
UTGB	GTSSWE201817.01	exon	R05D7.5	R05D7.5	chrI	12183579	+	45	1.153	99	-1	CE34492 | R05D7.5 | WBGene00011030 | WP:CE34492
UTGB	GTSSWE201818.07	outron	R05D7.7	R05D7.7	chrI	12191655	-	33	0	1462	1446	CE42148 | R05D7.7 | WBGene00077559 | WP:CE42148
UTGB	GTSSWE201819.01	outron	C15C6.1	C15C6.1	chrI	12199627	+	30	0	2602	2595	C15C6.1 | C15C6.1.1 | C15C6.1.2 | CE18501 | WBGene00007600 | WP:CE18501
UTGB	GTSSWE201820.01	outron	C15C6.3	C15C6.3	chrI	12206761	+	1518	9.697	328	326	C15C6.3 | CE42064 | WBGene00007602 | WP:CE42064
UTGB	GTSSWE201821.05	outron	C15C6.4	C15C6.4	chrI	12212387	+	104	11.56	733	714	C15C6.4 | CE18505 | WBGene00007603 | WP:CE18505
UTGB	GTSSWE201822.03	exon	sdz-14	F14B6.1	chrI	12217757	-	241	0.5015	40	-1	CE17663 | F14B6.1 | WBGene00008782 | WP:CE17663 | sdz-14
UTGB	GTSSWE201823.01	outron	F14B6.2	F14B6.2	chrI	12224498	-	23	0	2290	2209	CE25855 | F14B6.2 | WBGene00008783 | WP:CE25855
UTGB	GTSSWE201824.03	exon	F14B6.3	F14B6.3.1	chrI	12230523	+	3611	13.44	48	-1	CE17665 | F14B6.3 | F14B6.3.1 | F14B6.3.2 | WBGene00008784 | WP:CE17665
UTGB	GTSSWE201825.06	exon	F14B6.6	F14B6.6a	chrI	12232640	+	166	0.5927	62	-1	CE25856 | F14B6.6 | F14B6.6a | F14B6.6b | WBGene00008787 | WP:CE25856
UTGB	GTSSWE201826.01	exon	F14B6.4	F14B6.4	chrI	12235434	+	23	0	596	-1	CE34170 | F14B6.4 | WBGene00008785 | WP:CE34170
UTGB	GTSSWE201827.01	exon	F56H6.1	F56H6.1	chrI	12280830	+	24	0	381	-1	CE25910 | F56H6.1 | WBGene00010162 | WP:CE25910
UTGB	GTSSWE201828.01	exon	glct-4	C47F8.4	chrI	12319801	-	16	0	1282	-1	C47F8.4 | CE42926 | WBGene00008160 | WP:CE42926 | glct-4
UTGB	GTSSWE201829.01	outron	C47F8.7	C47F8.7	chrI	12327236	-	13	0	235	222	C47F8.7 | CE17576 | WBGene00008163 | WP:CE17576
UTGB	GTSSWE201830.01	exon	nhr-81	C47F8.8	chrI	12329547	-	25	0	62	-1	C47F8.8 | CE34166 | WBGene00003671 | WP:CE34166 | nhr-81
UTGB	GTSSWE201831.09	exon	C47F8.1	C47F8.1	chrI	12335119	+	184	2.75	13	-1	C47F8.1 | CE17570 | WBGene00008157 | WP:CE17570
UTGB	GTSSWE201832.02	exon	glct-1	T09E11.1	chrI	12336635	+	24	0	1323	-1	CE42898 | T09E11.1 | WBGene00011650 | WP:CE42898 | glct-1
UTGB	GTSSWE201833.01	exon	nhr-217	T09E11.2	chrI	12341112	+	34	0	23	-1	CE42165 | T09E11.2 | WBGene00011651 | WP:CE42165 | nhr-217
UTGB	GTSSWE201834.01	exon	T09E11.9	T09E11.9	chrI	12352222	-	26	0	2412	-1	CE42826 | T09E11.9 | WBGene00011658 | WP:CE42826
UTGB	GTSSWE201835.02	exon	T15D6.11	T15D6.11	chrI	12399004	-	28	0	722	-1	CE13700 | T15D6.11 | WBGene00011785 | WP:CE13700
UTGB	GTSSWE201836.01	exon	T15D6.12	T15D6.12	chrI	12401206	-	18	0	10	-1	CE13702 | T15D6.12 | WBGene00011786 | WP:CE13702
UTGB	GTSSWE201837.13	outron	E03H4.8	E03H4.8	chrI	12426832	-	138	1.673	351	327	CE09135 | E03H4.8 | WBGene00008476 | WP:CE09135
UTGB	GTSSWE201838.01	exon	clec-17	E03H4.10	chrI	12431463	-	77	0.6004	21	-1	CE20647 | E03H4.10 | WBGene00008477 | WP:CE20647 | clec-17
UTGB	GTSSWE201839.01	exon	E03H4.11	E03H4.11	chrI	12430572	+	15	0	2478	-1	CE09137 | E03H4.11 | WBGene00008478 | WP:CE09137
UTGB	GTSSWE201840.01	exon	C54C8.3	C54C8.3	chrI	12448997	-	11	0	586	-1	C54C8.3 | CE36473 | WBGene00008291 | WP:CE36473
UTGB	GTSSWE201841.04	exon	C54C8.4	C54C8.4	chrI	12449982	+	93	10.48	17	-1	C54C8.4 | CE08967 | WBGene00008292 | WP:CE08967
UTGB	GTSSWE201842.01	exon	glct-5	C54C8.5	chrI	12452622	+	11	0	1179	-1	C54C8.5 | CE42872 | WBGene00008293 | WP:CE42872 | glct-5
UTGB	GTSSWE201843.01	exon	clec-11	C54C8.7	chrI	12461978	-	17	0	1085	-1	C54C8.7 | CE08970 | WBGene00008294 | WP:CE08970 | clec-11
UTGB	GTSSWE201844.01	exon	T27F6.1	T27F6.1	chrI	12474234	-	22	0	925	-1	CE42025 | T27F6.1 | WBGene00012102 | WP:CE42025
UTGB	GTSSWE201845.08	exon	T27F6.10	T27F6.10	chrI	12476123	-	72	8.035	208	-1	CE42026 | T27F6.10 | WBGene00077508 | WP:CE42026
UTGB	GTSSWE201846.08	exon	clec-12	T27F6.2	chrI	12479072	-	54	1.371	494	-1	CE16512 | T27F6.2 | WBGene00012103 | WP:CE16512 | clec-12
UTGB	GTSSWE201847.01	outron	T27F6.4	T27F6.4	chrI	12483880	+	12	0	326	290	CE16513 | T27F6.4 | WBGene00012104 | WP:CE16513
UTGB	GTSSWE201848.11	outron	pars-2	T27F6.5a.1	chrI	12486973	+	329	15.93	57	33	CE16514 | CE40133 | CE40134 | CE41029 | T27F6.5 | T27F6.5a | T27F6.5a.1 | T27F6.5a.2 | T27F6.5a.3 | T27F6.5b | T27F6.5c | T27F6.5d | WBGene00004190 | WP:CE16514 | WP:CE40133 | WP:CE40134 | WP:CE41029 | pars-2 | prs-2
UTGB	GTSSWE201849.01	outron	T27F6.7	T27F6.7	chrI	12494368	+	21	0	454	447	CE16516 | T27F6.7 | T27F6.7.1 | T27F6.7.2 | WBGene00012106 | WP:CE16516
UTGB	GTSSWE201850.01	outron	T27F6.8	T27F6.8	chrI	12501281	-	30	1.477	1903	1882	CE16517 | T27F6.8 | WBGene00012107 | WP:CE16517
UTGB	GTSSWE201851.03	outron	unc-101	K11D2.3a.1	chrI	12508426	+	54	1.898	118	61	CE28050 | CE40095 | CE45092 | K11D2.3 | K11D2.3a | K11D2.3a.1 | K11D2.3a.2 | K11D2.3b | K11D2.3c | WBGene00006829 | WP:CE28050 | WP:CE40095 | WP:CE45092 | unc-101
UTGB	GTSSWE201852.14	outron	K11D2.5	K11D2.5	chrI	12513267	+	44	0	78	32	CE45044 | K11D2.5 | WBGene00010771 | WP:CE45044
UTGB	GTSSWE201853.04	exon	K11D2.4	K11D2.4a	chrI	12521496	+	27	1.492	2012	-1	CE12124 | CE40096 | CE43570 | CE45103 | CE45106 | K11D2.4 | K11D2.4a | K11D2.4b | K11D2.4c | K11D2.4d | K11D2.4e | WBGene00010770 | WP:CE12124 | WP:CE40096 | WP:CE43570 | WP:CE45103 | WP:CE45106
UTGB	GTSSWE201854.08	outron	W02D9.1.1	W02D9.1.1	chrI	12532164	-	984	13.09	47	39	CE24028 | CE45071 | W02D9.1 | W02D9.1.1 | W02D9.1.2 | W02D9.1a | W02D9.1a.1 | W02D9.1a.2 | W02D9.1b | W02D9.1b.1 | W02D9.1b.2 | WBGene00004181 | WP:CE24028 | WP:CE45071 | pri-2
UTGB	GTSSWE201856.02	outron	W02D9.3	W02D9.3	chrI	12534137	+	73	3.638	1179	1166	CE14458 | W02D9.3 | WBGene00012209 | WP:CE14458
UTGB	GTSSWE201857.01	outron	W02D9.4	W02D9.4	chrI	12539385	-	17	0	440	409	CE43196 | W02D9.4 | WBGene00012210 | WP:CE43196
UTGB	GTSSWE201858.05	outron	W02D9.10	W02D9.10	chrI	12551357	+	160	0	186	171	CE14472 | W02D9.10 | WBGene00012216 | WP:CE14472
UTGB	GTSSWE201859.01	exon	W02D9.7	W02D9.7	chrI	12559659	-	160	1.147	11	-1	CE14466 | W02D9.7 | WBGene00012213 | WP:CE14466
UTGB	GTSSWE201860.01	outron	W02D9.6	W02D9.6	chrI	12560699	-	16	4.438	37	35	CE14464 | W02D9.6 | WBGene00012212 | WP:CE14464
UTGB	GTSSWE201861.01	exon	W02D9.5	W02D9.5	chrI	12561549	-	13	0	11	-1	CE14462 | W02D9.5 | WBGene00012211 | WP:CE14462
UTGB	GTSSWE201862.05	outron	dlk-1	F33E2.2b	chrI	12574175	-	27	0	1389	1384	CE23702 | CE36153 | CE36154 | CE36155 | CE45072 | F33E2.2 | F33E2.2a | F33E2.2a.1 | F33E2.2a.2 | F33E2.2b | F33E2.2b.1 | F33E2.2b.2 | F33E2.2c | F33E2.2c.1 | F33E2.2c.2 | F33E2.2d | F33E2.2d.1 | F33E2.2d.2 | F33E2.2e | WBGene00001008 | WP:CE23702 | WP:CE36153 | WP:CE36154 | WP:CE36155 | WP:CE45072 | dlk-1
UTGB	GTSSWE201863.05	exon	clec-102	F33E2.3	chrI	12582495	-	31	0	1548	-1	CE42807 | F33E2.3 | WBGene00009359 | WP:CE42807 | clec-102
UTGB	GTSSWE201864.01	exon	F33E2.7	F33E2.7	chrI	12583491	+	15	0	1897	-1	CE34841 | F33E2.7 | WBGene00009363 | WP:CE34841
UTGB	GTSSWE201865.08	outron	F33E2.5	F33E2.5	chrI	12592985	-	322	1.509	647	644	CE09906 | F33E2.5 | F33E2.5.1 | F33E2.5.2 | WBGene00009361 | WP:CE09906
UTGB	GTSSWE201866.01	outron	T07D10.1	T07D10.1	chrI	12608380	-	22	0	2143	2139	CE21161 | T07D10.1 | WBGene00011581 | WP:CE21161
UTGB	GTSSWE201867.02	exon	T07D10.2	T07D10.2	chrI	12620424	+	27	0	736	-1	CE13377 | T07D10.2 | WBGene00011582 | WP:CE13377
UTGB	GTSSWE201868.02	outron	H28O16.2	H28O16.2	chrI	12653878	-	298	1.379	1814	1801	CE42131 | H28O16.2 | WBGene00010420 | WP:CE42131
UTGB	GTSSWE201869.03	exon	H28O16.1	H28O16.1c	chrI	12652334	+	611	6.761	45	-1	CE18826 | CE34194 | CE34195 | CE36263 | H28O16.1 | H28O16.1a | H28O16.1b | H28O16.1c | H28O16.1d | H28O16.1d.1 | H28O16.1d.2 | H28O16.1d.3 | H28O16.1d.4 | H28O16.1d.5 | H28O16.1d.6 | WBGene00010419 | WP:CE18826 | WP:CE34194 | WP:CE34195 | WP:CE36263 | phi-37
UTGB	GTSSWE201870.03	outron	T26E3.7	T26E3.7	chrI	12656948	-	21	0	988	946	CE14196 | T26E3.7 | WBGene00012040 | WP:CE14196
UTGB	GTSSWE201871.05	exon	T26E3.8	T26E3.8	chrI	12662099	-	230	0.4525	2732	-1	CE40339 | T26E3.8 | WBGene00012041 | WP:CE40339
UTGB	GTSSWE201873.04	exon	T26E3.5	T26E3.5	chrI	12663729	-	764	1.472	16	-1	CE14192 | T26E3.5 | WBGene00012038 | WP:CE14192
UTGB	GTSSWE201874.03	exon	T26E3.4	T26E3.4	chrI	12665084	+	730	10.24	25	-1	CE24015 | T26E3.4 | WBGene00012037 | WP:CE24015
UTGB	GTSSWE201876.05	outron	ndx-1	T26E3.2	chrI	12677926	+	43	0	1274	1270	CE14186 | T26E3.2 | WBGene00003578 | WP:CE14186 | ndx-1
UTGB	GTSSWE201877.01	exon	sra-18	F28C12.2	chrI	12690763	+	10	0	1395	-1	CE09749 | F28C12.2 | WBGene00005044 | WP:CE09749 | sra-18
UTGB	GTSSWE201878.01	exon	sra-22	F28C12.7	chrI	12701068	+	12	0	360	-1	CE33386 | F28C12.7 | WBGene00005048 | WP:CE33386 | sra-22
UTGB	GTSSWE201879.01	exon	T06G6.6	T06G6.6b	chrI	12718321	+	17	0	50	-1	CE37143 | CE41260 | T06G6.6 | T06G6.6a | T06G6.6b | WBGene00011548 | WP:CE37143 | WP:CE41260
UTGB	GTSSWE201880.01	outron	T06G6.12	T06G6.12	chrI	12723353	-	13	0	491	482	CE34994 | T06G6.12 | WBGene00011551 | WP:CE34994
UTGB	GTSSWE201881.09	exon	pfd-3	T06G6.9	chrI	12728184	+	535	2.635	60	-1	CE13349 | T06G6.9 | WBGene00006889 | WP:CE13349 | pfd-3 | vbp-1
UTGB	GTSSWE201883.02	exon	vps-25	W02A11.2.1	chrI	12738531	-	155	0	1954	-1	CE24025 | W02A11.2 | W02A11.2.1 | W02A11.2.2 | WBGene00012193 | WP:CE24025 | vps-25
UTGB	GTSSWE201884.02	outron	toe-4	W02A11.3	chrI	12736953	+	27	3.884	1139	1123	CE18990 | W02A11.3 | WBGene00012194 | WP:CE18990 | toe-4
UTGB	GTSSWE201885.02	outron	uba-2	W02A11.4	chrI	12741312	+	37	0	282	265	CE40719 | W02A11.4 | WBGene00006700 | WP:CE40719 | uba-2
UTGB	GTSSWE201886.24	outron	bath-34	W02A11.5	chrI	12749405	+	177	8.91	620	620	CE18992 | W02A11.5 | WBGene00012195 | WP:CE18992 | bath-34
UTGB	GTSSWE201887.02	exon	bath-35	W02A11.8	chrI	12758011	+	19	0	502	-1	CE18993 | W02A11.8 | WBGene00012196 | WP:CE18993 | bath-35
UTGB	GTSSWE201888.01	outron	B0019.2	B0019.2	chrI	12773562	+	21	0	88	86	B0019.2 | B0019.2.1 | B0019.2.2 | CE42791 | WBGene00007094 | WP:CE42791
UTGB	GTSSWE201890.03	exon	Y18D10A.2	Y18D10A.2	chrI	12809340	-	28	0	54	-1	CE43284 | WBGene00012475 | WP:CE43284 | Y18D10A.2
UTGB	GTSSWE201891.01	exon	Y18D10A.3	Y18D10A.3	chrI	12816097	-	16	0	466	-1	CE21399 | WBGene00012476 | WP:CE21399 | Y18D10A.3
UTGB	GTSSWE201892.23	exon	Y18D10A.4	Y18D10A.4	chrI	12814507	+	61	1.341	1386	-1	CE21400 | WBGene00012477 | WP:CE21400 | Y18D10A.4
UTGB	GTSSWE201894.06	exon	nhx-8	Y18D10A.6a	chrI	12824876	+	141	5.234	905	-1	CE31092 | CE31093 | WBGene00003735 | WP:CE31092 | WP:CE31093 | Y18D10A.6 | Y18D10A.6a | Y18D10A.6b | Y18D10A.6b.1 | Y18D10A.6b.2 | nhx-8
UTGB	GTSSWE201895.01	exon	ptr-17	Y18D10A.7c	chrI	12833537	+	25	2.368	1117	-1	CE21403 | CE38115 | CE38116 | WBGene00004231 | WP:CE21403 | WP:CE38115 | WP:CE38116 | Y18D10A.7 | Y18D10A.7a | Y18D10A.7b | Y18D10A.7b.1 | Y18D10A.7b.2 | Y18D10A.7c | ptr-17
UTGB	GTSSWE201896.01	exon	Y18D10A.8	Y18D10A.8	chrI	12844340	+	84	11.89	277	-1	CE21404 | WBGene00012478 | WP:CE21404 | Y18D10A.8
UTGB	GTSSWE201897.03	outron	Y18D10A.9	Y18D10A.9	chrI	12858460	-	38	3.064	208	200	CE34506 | WBGene00012479 | WP:CE34506 | Y18D10A.9
UTGB	GTSSWE201898.01	exon	clec-104	Y18D10A.10	chrI	12858847	+	14	0	641	-1	CE21406 | WBGene00012480 | WP:CE21406 | Y18D10A.10 | clec-104
UTGB	GTSSWE201899.03	exon	Y18D10A.11	Y18D10A.11	chrI	12863482	-	917	0.7674	57	-1	CE21407 | WBGene00012481 | WP:CE21407 | Y18D10A.11
UTGB	GTSSWE201900.04	outron	pad-1	Y18D10A.13	chrI	12877259	+	667	2.953	1382	1369	CE27468 | WBGene00003905 | WP:CE27468 | Y18D10A.13 | pad-1
UTGB	GTSSWE201901.06	outron	Y18D10A.16	Y18D10A.16	chrI	12904017	-	114	3.607	578	561	CE21412 | WBGene00012483 | WP:CE21412 | Y18D10A.16
UTGB	GTSSWE201902.19	outron	car-1	Y18D10A.17	chrI	12904125	+	239	0	340	334	CE21413 | WBGene00012484 | WP:CE21413 | Y18D10A.17 | Y18D10A.17.1 | Y18D10A.17.2 | car-1 | lsm-14
UTGB	GTSSWE201903.02	outron	fkb-8	Y18D10A.25	chrI	12916290	+	19	0	214	140	CE21415 | WBGene00001433 | WP:CE21415 | Y18D10A.25 | fkb-8
UTGB	GTSSWE201904.11	outron	fkb-2	Y18D10A.19.1	chrI	12918309	+	1167	0.752	406	401	CE21417 | WBGene00001427 | WP:CE21417 | Y18D10A.19 | Y18D10A.19.1 | Y18D10A.19.2 | fkb-2
UTGB	GTSSWE201906.01	exon	Y18D10A.21	Y18D10A.21	chrI	12927553	+	11	0	1833	-1	CE36229 | WBGene00012486 | WP:CE36229 | Y18D10A.21
UTGB	GTSSWE201907.01	outron	Y18D10A.22	Y18D10A.22	chrI	12931399	+	12	0	626	626	CE38440 | WBGene00014864 | WP:CE38440 | Y18D10A.22
UTGB	GTSSWE201908.03	outron	acox-1	F08A8.1a.1	chrI	12937909	+	46	0	641	640	CE17633 | CE36125 | CE39570 | F08A8.1 | F08A8.1a | F08A8.1a.1 | F08A8.1a.2 | F08A8.1b | F08A8.1b.1 | F08A8.1b.2 | F08A8.1b.3 | F08A8.1b.4 | F08A8.1c | F08A8.1c.1 | F08A8.1c.2 | WBGene00008564 | WP:CE17633 | WP:CE36125 | WP:CE39570 | acox-1
UTGB	GTSSWE201909.01	exon	F08A8.2	F08A8.2	chrI	12942268	+	79	0	28	-1	CE43421 | F08A8.2 | WBGene00008565 | WP:CE43421
UTGB	GTSSWE201910.01	exon	fbxa-140	C47B2.1	chrI	12962382	-	30	0	2	-1	C47B2.1 | CE17561 | WBGene00008130 | WP:CE17561 | fbxa-140
UTGB	GTSSWE201911.03	outron	C47B2.2	C47B2.2a	chrI	12964676	-	28	1.139	117	115	C47B2.2 | C47B2.2a | C47B2.2a.1 | C47B2.2a.2 | C47B2.2b | C47B2.2b.1 | C47B2.2b.2 | CE17562 | CE23599 | WBGene00008131 | WP:CE17562 | WP:CE23599
UTGB	GTSSWE201912.05	outron	tba-2	C47B2.3.1	chrI	12966857	-	348	0.7846	605	597	Alpha-tubulin | C47B2.3 | C47B2.3.1 | C47B2.3.2 | C47B2.3.3 | CE17563 | TUBA4B | WBGene00006529 | WP:CE17563 | mel-45 | tba-2
UTGB	GTSSWE201913.02	outron	pbs-2	C47B2.4	chrI	12968534	-	28	0	266	265	C47B2.4 | CE17564 | WBGene00003948 | WP:CE17564 | pbs-2
UTGB	GTSSWE201915.08	outron	prx-11	C47B2.8	chrI	12970462	+	84	0	1141	1128	C47B2.8 | CE17569 | WBGene00004196 | WP:CE17569 | prx-11
UTGB	GTSSWE201916.05	outron	gale-1	C47B2.6a	chrI	12973383	+	50	0	1811	1790	C47B2.6 | C47B2.6a | C47B2.6a.1 | C47B2.6a.2 | C47B2.6b | CE17566 | CE38295 | WBGene00008132 | WP:CE17566 | WP:CE38295 | gale-1
UTGB	GTSSWE201917.01	outron	selb-1	C47B2.7a	chrI	12978680	+	23	0	147	147	C47B2.7 | C47B2.7a | C47B2.7b | CE17567 | CE24853 | WBGene00008133 | WP:CE17567 | WP:CE24853 | selb-1
UTGB	GTSSWE201918.01	exon	nlp-15	CC4.2	chrI	12988218	+	22	1.593	45	-1	CC4.2 | CE36118 | WBGene00003753 | WP:CE36118 | nlp-15
UTGB	GTSSWE201919.02	exon	CC4.3.2	CC4.3.2	chrI	12995824	+	158	1.892	53	-1	CC4.3 | CC4.3.1 | CC4.3.2 | CE15742 | WBGene00004895 | WP:CE15742 | smu-1
UTGB	GTSSWE201922.06	exon	W05B5.1	W05B5.1	chrI	13040729	+	136	1.51	1952	-1	CE19005 | W05B5.1 | WBGene00012274 | WP:CE19005
UTGB	GTSSWE201923.06	outron	nhr-85	W05B5.3b.2	chrI	13061178	-	95	2.006	2201	1564	CE20150 | CE26023 | W05B5.3 | W05B5.3a | W05B5.3b | W05B5.3b.1 | W05B5.3b.2 | WBGene00003675 | WP:CE20150 | WP:CE26023 | nhr-85
UTGB	GTSSWE201924.01	exon	Y26D4A.2	Y26D4A.2	chrI	13064235	+	10	0	2720	-1	CE36230 | WBGene00012500 | WP:CE36230 | Y26D4A.2
UTGB	GTSSWE201925.01	exon	Y26D4A.13	Y26D4A.13	chrI	13088958	+	36	0	2139	-1	CE39645 | WBGene00012510 | WP:CE39645 | Y26D4A.13
UTGB	GTSSWE201926.04	exon	F22G12.3	F22G12.3	chrI	13152546	+	88	12.82	38	-1	CE15890 | F22G12.3 | WBGene00009063 | WP:CE15890
UTGB	GTSSWE201927.05	outron	F22G12.6	F22G12.6	chrI	13161916	-	192	2.897	427	419	F22G12.6
UTGB	GTSSWE201928.01	outron	F22G12.5	F22G12.5	chrI	13159936	+	44	1.593	2551	2546	CE42506 | F22G12.5 | WBGene00009065 | WP:CE42506
UTGB	GTSSWE201929.02	exon	F17B5.1	F17B5.1a	chrI	13182443	+	28	0	2475	-1	CE15865 | F17B5.1 | F17B5.1a | F17B5.1b | WBGene00008905 | WP:CE15865
UTGB	GTSSWE201930.01	exon	oac-17	F17B5.2	chrI	13194878	-	21	0	315	-1	CE43121 | F17B5.2 | WBGene00008906 | WP:CE43121 | oac-17
UTGB	GTSSWE201931.05	exon	F17B5.6	F17B5.6	chrI	13201749	+	440	1.443	48	-1	CE37896 | F17B5.6 | WBGene00044058 | WP:CE37896
UTGB	GTSSWE201932.01	exon	ZK1225.1	ZK1225.1	chrI	13205558	+	13	0	94	-1	CE19340 | WBGene00014235 | WP:CE19340 | ZK1225.1
UTGB	GTSSWE201933.01	exon	ZK1225.2	ZK1225.2	chrI	13208247	+	25	1.672	182	-1	CE19341 | WBGene00014236 | WP:CE19341 | ZK1225.2
UTGB	GTSSWE201934.02	exon	ssp-31	ZK1225.6	chrI	13218003	+	18	0	1126	-1	CE19345 | WBGene00006048 | WP:CE19345 | ZK1225.6 | ssp-31
UTGB	GTSSWE201936.01	outron	ZK1053.3	ZK1053.3	chrI	13244808	+	17	0	2033	2027	CE42206 | WBGene00014198 | WP:CE42206 | ZK1053.3
UTGB	GTSSWE201937.21	outron	F44F1.5	F44F1.5	chrI	13260367	-	2170	4.396	161	156	F44F1.5 | WBGene00009697
UTGB	GTSSWE201938.09	outron	F44F1.6	F44F1.6a	chrI	13263064	-	162	0.4312	348	334	CE23728 | CE23729 | F44F1.6 | F44F1.6a | F44F1.6b | WBGene00009698 | WP:CE23728 | WP:CE23729
UTGB	GTSSWE201939.07	exon	F44F1.4	F44F1.4	chrI	13265701	-	1710	0.6709	112	-1	CE42861 | F44F1.4 | WBGene00009696 | WP:CE42861
UTGB	GTSSWE201940.03	outron	vet-6	F44F1.7	chrI	13269836	+	668	0.728	152	136	CE10424 | F44F1.7 | WBGene00006902 | WP:CE10424 | vet-6
UTGB	GTSSWE201941.18	outron	M01E5.2	M01E5.2	chrI	13281438	-	437	6.784	1293	1274	CE12276 | M01E5.2 | WBGene00010805 | WP:CE12276
UTGB	GTSSWE201943.01	outron	M01E5.4	M01E5.4	chrI	13289845	-	51	1.972	316	314	CE12280 | M01E5.4 | WBGene00010807 | WP:CE12280
UTGB	GTSSWE201945.02	outron	sepa-1	M01E5.6	chrI	13301559	-	838	0.3775	869	856	CE12286 | M01E5.6 | WBGene00010808 | WP:CE12286 | sepa-1
UTGB	GTSSWE201946.04	outron	T04D3.1	T04D3.1	chrI	13305092	-	176	0.5062	811	792	CE13153 | T04D3.1 | WBGene00011431 | WP:CE13153
UTGB	GTSSWE201947.01	exon	sdz-30	T04D3.2	chrI	13303661	+	18	0	2532	-1	CE13155 | T04D3.2 | WBGene00011432 | WP:CE13155 | sdz-30
UTGB	GTSSWE201948.01	outron	pde-1	T04D3.3	chrI	13319692	-	20	0	999	989	CE16340 | CE42925 | T04D3.3 | T04D3.3a | T04D3.3b | WBGene00011433 | WP:CE16340 | WP:CE42925 | pde-1
UTGB	GTSSWE201949.01	exon	gcy-35	T04D3.4	chrI	13325281	+	13	0	69	-1	CE34497 | T04D3.4 | WBGene00001555 | WP:CE34497 | gcy-35
UTGB	GTSSWE201950.02	outron	T04D3.5	T04D3.5.1	chrI	13330928	-	229	8.27	182	178	CE13161 | T04D3.5 | T04D3.5.1 | T04D3.5.2 | WBGene00011434 | WP:CE13161
UTGB	GTSSWE201951.13	outron	W08E3.2	W08E3.2	chrI	13337203	-	508	1.207	1076	1068	CE26028 | W08E3.2 | WBGene00012343 | WP:CE26028
UTGB	GTSSWE201952.01	exon	W08E3.4	W08E3.4	chrI	13340177	-	16	0	1300	-1	CE41273 | W08E3.4 | WBGene00012345 | WP:CE41273
UTGB	GTSSWE201953.15	outron	snr-2	W08E3.1	chrI	13339095	+	272	12.75	324	290	CE14704 | W08E3.1 | W08E3.1.1 | W08E3.1.2 | WBGene00004915 | WP:CE14704 | snr-2
UTGB	GTSSWE201955.01	exon	Y40B1A.1	Y40B1A.1	chrI	13343747	+	140	6.626	1602	-1	CE45062 | CE45388 | WBGene00012732 | WP:CE45062 | WP:CE45388 | Y40B1A.1 | Y40B1A.1a | Y40B1A.1b
UTGB	GTSSWE201956.02	exon	Y40B1A.5	Y40B1A.5	chrI	13349283	+	176	0.7876	2752	-1	WBGene00199416 | Y40B1A.5
UTGB	GTSSWE201957.01	exon	Y40B1A.3	Y40B1A.3	chrI	13353327	+	34	0	731	-1	CE43137 | CE43287 | CE45409 | WBGene00012734 | WP:CE43137 | WP:CE43287 | WP:CE45409 | Y40B1A.3 | Y40B1A.3a | Y40B1A.3b | Y40B1A.3c
UTGB	GTSSWE201959.03	outron	C01A2.9	C01A2.9	chrI	13376533	+	16	0	331	300	C01A2.9 | CE45328 | WBGene00077546 | WP:CE45328
UTGB	GTSSWE201960.01	exon	C01A2.5	C01A2.5	chrI	13384759	+	1159	12.98	63	-1	C01A2.5 | CE07787 | WBGene00007217 | WP:CE07787
UTGB	GTSSWE201961.04	outron	C01A2.3	C01A2.3	chrI	13387692	+	19	0	128	115	C01A2.3 | C01A2.3.1 | C01A2.3.2 | CE38582 | WBGene00007215 | WP:CE38582
UTGB	GTSSWE201962.01	outron	C01A2.4	C01A2.4	chrI	13391251	+	17	0	876	855	C01A2.4 | C01A2.4.1 | C01A2.4.2 | CE34247 | WBGene00007216 | WP:CE34247
UTGB	GTSSWE201963.01	outron	C01A2.2	C01A2.2	chrI	13395293	+	28	0	1965	1965	C01A2.2 | C01A2.2a | C01A2.2b | CE07784 | CE42735 | WBGene00007214 | WP:CE07784 | WP:CE42735
UTGB	GTSSWE201964.01	outron	nlp-38	C01A2.7.1	chrI	13401024	+	25	0	1452	1413	C01A2.7 | C01A2.7.1 | C01A2.7.2 | CE30236 | WBGene00007219 | WP:CE30236 | nlp-38
UTGB	GTSSWE201965.24	outron	C01A2.1	C01A2.1.1	chrI	13411081	-	261	0.4029	585	583	C01A2.1 | C01A2.1.1 | C01A2.1.2 | CE07783 | WBGene00007213 | WP:CE07783
UTGB	GTSSWE201966.01	exon	W05H12.2	W05H12.2	chrI	13413160	-	2431	1.315	292	-1	CE14660 | W05H12.2 | WBGene00012290 | WP:CE14660
UTGB	GTSSWE201967.03	outron	W05H12.1	W05H12.1	chrI	13415603	+	33	0	2864	2843	CE24031 | W05H12.1 | WBGene00012289 | WP:CE24031
UTGB	GTSSWE201968.03	exon	fbxb-66	Y40B1B.3	chrI	13425132	-	2730	1.595	21	-1	CE20237 | WBGene00044066 | WP:CE20237 | Y40B1B.3 | fbxb-66 | tag-228
UTGB	GTSSWE201969.03	outron	Y40B1B.7	Y40B1B.7	chrI	13428712	-	158	0.8283	259	252	CE21790 | WBGene00012739 | WP:CE21790 | Y40B1B.7
UTGB	GTSSWE201970.05	outron	Y40B1B.8	Y40B1B.8	chrI	13428812	+	59	0.4843	96	89	CE24254 | WBGene00012740 | WP:CE24254 | Y40B1B.8 | Y40B1B.8.1 | Y40B1B.8.2
UTGB	GTSSWE201971.04	outron	eif-3.J	Y40B1B.5	chrI	13434580	+	128	0.6698	913	907	CE20239 | WBGene00012738 | WP:CE20239 | Y40B1B.5 | Y40B1B.5.1 | Y40B1B.5.2 | eif-3.J
UTGB	GTSSWE201972.01	outron	spr-5	Y40B1B.6.1	chrI	13437754	+	233	18.48	302	300	CE20240 | WBGene00005010 | WP:CE20240 | Y40B1B.6 | Y40B1B.6.1 | Y40B1B.6.2 | spr-5
UTGB	GTSSWE201973.05	exon	Y48G10A.6	Y48G10A.6	chrI	13449978	+	99	1.601	1564	-1	CE35092 | WBGene00013023 | WP:CE35092 | Y48G10A.6
UTGB	GTSSWE201975.07	outron	Y48G10A.3	Y48G10A.3	chrI	13475653	-	115	3.877	1483	1479	CE25314 | WBGene00013020 | WP:CE25314 | Y48G10A.3 | Y48G10A.3.1 | Y48G10A.3.2
UTGB	GTSSWE201976.04	outron	Y48G10A.2	Y48G10A.2	chrI	13489249	-	15	0	1892	1856	CE25313 | WBGene00013019 | WP:CE25313 | Y48G10A.2
UTGB	GTSSWE201977.02	outron	Y48G10A.1	Y48G10A.1.1	chrI	13489534	+	12	0	46	41	CE25312 | WBGene00013018 | WP:CE25312 | Y48G10A.1 | Y48G10A.1.1 | Y48G10A.1.2
UTGB	GTSSWE201978.04	outron	Y87G2A.17	Y87G2A.17	chrI	13496175	-	30	0	2888	2869	CE35142 | WBGene00013603 | WP:CE35142 | Y87G2A.17
UTGB	GTSSWE201979.01	exon	ndx-8	Y87G2A.14	chrI	13500480	+	26	0	2553	-1	CE23122 | WBGene00003585 | WP:CE23122 | Y87G2A.14 | ndx-8
UTGB	GTSSWE201981.04	outron	Y87G2A.18	Y87G2A.18	chrI	13514301	-	103	4.903	25	22	CE23124 | WBGene00013604 | WP:CE23124 | Y87G2A.18
UTGB	GTSSWE201982.03	outron	Y87G2A.1	Y87G2A.1	chrI	13514516	+	18	0	22	22	CE40292 | WBGene00013593 | WP:CE40292 | Y87G2A.1
UTGB	GTSSWE201984.04	outron	aex-6	Y87G2A.4	chrI	13547297	-	21	0	2124	2120	CE23130 | WBGene00000089 | WP:CE23130 | Y87G2A.4 | Y87G2A.4.1 | Y87G2A.4.2 | aex-6 | rab-27 | rab27
UTGB	GTSSWE201985.02	outron	vars-2	Y87G2A.5	chrI	13559444	-	23	0	111	94	CE24685 | WBGene00006936 | WP:CE24685 | Y87G2A.5 | vars-2 | vrs-2
UTGB	GTSSWE201986.04	exon	Y87G2A.16	Y87G2A.16	chrI	13560507	+	34	0	9	-1	CE34233 | WBGene00013602 | WP:CE34233 | Y87G2A.16
UTGB	GTSSWE201987.01	exon	grd-15	Y87G2A.15	chrI	13564533	+	23	0	24	-1	CE34232 | WBGene00001704 | WP:CE34232 | Y87G2A.15 | grd-15
UTGB	GTSSWE201988.01	outron	cyn-15	Y87G2A.6.1	chrI	13574115	-	74	0	2090	2081	CE24686 | WBGene00000891 | WP:CE24686 | Y87G2A.6 | Y87G2A.6.1 | Y87G2A.6.2 | cyn-15 | cyp-15
UTGB	GTSSWE201989.02	outron	Y87G2A.7	Y87G2A.7	chrI	13572202	+	40	1.832	165	165	CE23136 | WBGene00013596 | WP:CE23136 | Y87G2A.7
UTGB	GTSSWE201991.01	outron	ubc-14	Y87G2A.9	chrI	13581420	+	363	0.5916	278	266	CE24688 | WBGene00006709 | WP:CE24688 | Y87G2A.9 | Y87G2A.9.1 | Y87G2A.9.2 | ubc-14
UTGB	GTSSWE201992.05	outron	vps-28	Y87G2A.10a.1	chrI	13588947	-	28	0	134	127	CE23139 | WBGene00013598 | WP:CE23139 | Y87G2A.10 | Y87G2A.10a | Y87G2A.10a.1 | Y87G2A.10a.2 | Y87G2A.10b | vps-28
UTGB	GTSSWE201993.03	outron	Y87G2A.11	Y87G2A.11	chrI	13598929	-	22	1.861	436	435	CE24682 | WBGene00013599 | WP:CE24682 | Y87G2A.11
UTGB	GTSSWE201994.03	outron	Y87G2A.13	Y87G2A.13.1	chrI	13604131	-	48	15.08	749	749	CE37591 | WBGene00013601 | WP:CE37591 | Y87G2A.13 | Y87G2A.13.1 | Y87G2A.13.2
UTGB	GTSSWE201996.01	outron	W09C5.1	W09C5.1.1	chrI	13629374	-	46	0	977	976	CE20164 | W09C5.1 | W09C5.1.1 | W09C5.1.2 | WBGene00012351 | WP:CE20164
UTGB	GTSSWE201997.06	outron	unc-59	W09C5.2	chrI	13629076	+	119	12.47	145	139	CE20165 | W09C5.2 | W09C5.2.1 | W09C5.2.2 | WBGene00006793 | WP:CE20165 | unc-59 | unc-88
UTGB	GTSSWE201998.01	exon	ins-33	W09C5.4	chrI	13640342	-	16	0	1050	-1	CE20166 | W09C5.4 | WBGene00002116 | WP:CE20166 | ins-33
UTGB	GTSSWE201999.01	outron	dkf-1	W09C5.5	chrI	13650828	-	53	2.139	2443	2435	CE20167 | W09C5.5 | WBGene00012352 | WP:CE20167 | dkf-1
UTGB	GTSSWE202000.01	outron	rpl-31	W09C5.6a.1	chrI	13653896	-	44	3.383	223	213	CE20168 | CE20169 | W09C5.6 | W09C5.6a | W09C5.6a.1 | W09C5.6a.2 | W09C5.6b | W09C5.6b.1 | W09C5.6b.2 | W09C5.6b.3 | W09C5.6b.4 | W09C5.6b.5 | W09C5.6b.6 | WBGene00004445 | WP:CE20168 | WP:CE20169 | rpl-31
UTGB	GTSSWE202002.08	outron	W09C5.8	W09C5.8.1	chrI	13659494	-	395	0.4966	395	378	CE20171 | W09C5.8 | W09C5.8.1 | W09C5.8.2 | WBGene00012354 | WP:CE20171
UTGB	GTSSWE202003.01	exon	W09C5.9	W09C5.9	chrI	13658807	+	20	0	1782	-1	CE42897 | W09C5.9 | WBGene00012355 | WP:CE42897
UTGB	GTSSWE202004.02	outron	W04A4.5	W04A4.5	chrI	13663466	+	888	5.104	58	52	CE25138 | W04A4.5 | WBGene00012234 | WP:CE25138
UTGB	GTSSWE202005.01	exon	W04A4.4	W04A4.4	chrI	13678148	-	30	0	770	-1	CE42935 | W04A4.4 | WBGene00012233 | WP:CE42935
UTGB	GTSSWE202006.01	exon	W04A4.2	W04A4.2	chrI	13682124	+	156	0	285	-1	CE42178 | W04A4.2 | WBGene00012231 | WP:CE42178
UTGB	GTSSWE202007.02	outron	W04A4.6	W04A4.6	chrI	13688980	-	18	0	1421	1412	CE35042 | W04A4.6 | WBGene00012235 | WP:CE35042
UTGB	GTSSWE202008.01	exon	Y6B3B.1	Y6B3B.1	chrI	13706306	-	19	3.041	2980	-1	CE42663 | WBGene00012387 | WP:CE42663 | Y6B3B.1
UTGB	GTSSWE202009.02	outron	lagr-1	Y6B3B.10	chrI	13732058	-	88	0	80	26	CE20184 | WBGene00006505 | WP:CE20184 | Y6B3B.10 | lagr-1
UTGB	GTSSWE202011.03	outron	Y6B3B.5	Y6B3B.5a	chrI	13756287	-	21	0	166	157	CE37581 | CE37582 | WBGene00012390 | WP:CE37581 | WP:CE37582 | Y6B3B.5 | Y6B3B.5a | Y6B3B.5b
UTGB	GTSSWE202012.01	outron	Y6B3B.12	Y6B3B.12	chrI	13756611	+	42	0	113	108	WBGene00195985 | Y6B3B.12
UTGB	GTSSWE202013.07	outron	Y37H9A.1	Y37H9A.1b	chrI	13772781	+	39	0.8338	277	273	CE20227 | CE37562 | WBGene00012576 | WP:CE20227 | WP:CE37562 | Y37H9A.1 | Y37H9A.1a | Y37H9A.1b
UTGB	GTSSWE202014.05	outron	ndx-4	Y37H9A.6.2	chrI	13795957	-	27	1.349	1829	1817	CE20230 | WBGene00003581 | WP:CE20230 | Y37H9A.6 | Y37H9A.6.1 | Y37H9A.6.2 | ndx-4
UTGB	GTSSWE202015.02	exon	Y37H9A.5	Y37H9A.5	chrI	13796955	-	34	0	77	-1	CE41042 | WBGene00014871 | WP:CE41042 | Y37H9A.5
UTGB	GTSSWE202016.06	outron	W09G3.7	W09G3.7a	chrI	13802246	-	49	2.12	46	37	CE34217 | CE41036 | W09G3.7 | W09G3.7a | W09G3.7b | WBGene00012370 | WP:CE34217 | WP:CE41036
UTGB	GTSSWE202017.01	exon	tag-229	W09G3.3	chrI	13807103	-	43	9.184	325	-1	CE34215 | W09G3.3 | WBGene00044065 | WP:CE34215 | tag-229
UTGB	GTSSWE202018.03	exon	W09G3.2	W09G3.2	chrI	13812111	-	27	2.024	11	-1	CE16568 | W09G3.2 | WBGene00012366 | WP:CE16568
UTGB	GTSSWE202019.01	outron	W09G3.8	W09G3.8.1	chrI	13814979	-	64	1.219	687	669	CE35191 | W09G3.8 | W09G3.8.1 | W09G3.8.2 | W09G3.8.3 | WBGene00012371 | WP:CE35191
UTGB	GTSSWE202020.01	outron	W09G3.6	W09G3.6	chrI	13828096	-	14	0	127	126	CE28969 | CE42763 | W09G3.6 | W09G3.6a | W09G3.6b | WBGene00012369 | WP:CE28969 | WP:CE42763
UTGB	GTSSWE202021.03	outron	W09G3.1	W09G3.1a	chrI	13834267	-	24	0	2146	2133	CE32509 | CE40147 | W09G3.1 | W09G3.1a | W09G3.1b | W09G3.1b.1 | W09G3.1b.2 | WBGene00012365 | WP:CE32509 | WP:CE40147
UTGB	GTSSWE202022.11	exon	W04A8.1	W04A8.1	chrI	13840022	-	77	17.29	42	-1	CE16535 | CE42825 | W04A8.1 | W04A8.1a | W04A8.1b | WBGene00012236 | WP:CE16535 | WP:CE42825
UTGB	GTSSWE202023.05	outron	W04A8.2	W04A8.2	chrI	13840126	+	45	1.153	567	565	CE42748 | W04A8.2 | WBGene00012237 | WP:CE42748
UTGB	GTSSWE202024.23	exon	W04A8.4	W04A8.4	chrI	13843237	-	4392	0.3536	625	-1	CE16538 | W04A8.4 | WBGene00012239 | WP:CE16538
UTGB	GTSSWE202025.04	exon	W04A8.3	W04A8.3	chrI	13846944	-	169	3.837	952	-1	CE42775 | W04A8.3 | WBGene00012238 | WP:CE42775
UTGB	GTSSWE202026.02	exon	W04A8.5	W04A8.5	chrI	13850853	-	348	7.184	52	-1	CE16539 | W04A8.5 | WBGene00012240 | WP:CE16539
UTGB	GTSSWE202027.03	exon	W04A8.6	W04A8.6	chrI	13852112	+	49	6.172	954	-1	CE45063 | CE45111 | W04A8.6 | W04A8.6a | W04A8.6b | WBGene00012241 | WP:CE45063 | WP:CE45111
UTGB	GTSSWE202028.02	outron	taf-1	W04A8.7	chrI	13859564	+	52	0.6006	1899	1897	CE42634 | W04A8.7 | WBGene00006382 | WP:CE42634 | taf-1
UTGB	GTSSWE202029.01	outron	usp-3	Y71A12B.9	chrI	13954089	-	34	0	2473	2473	CE41289 | WBGene00013506 | WP:CE41289 | Y71A12B.9 | usp-3
UTGB	GTSSWE202030.03	outron	rps-6	Y71A12B.1	chrI	13951918	+	188	1.008	247	230	CE24592 | WBGene00004475 | WP:CE24592 | Y71A12B.1 | Y71A12B.1.1 | Y71A12B.1.2 | rps-6
UTGB	GTSSWE202031.03	outron	Y71A12B.11	Y71A12B.11	chrI	13978341	+	190	1.323	93	75	CE24598 | WBGene00013508 | WP:CE24598 | Y71A12B.11
UTGB	GTSSWE202032.01	exon	Y71A12B.17	Y71A12B.17	chrI	13984232	+	597	0.4526	63	-1	CE40539 | WBGene00045058 | WP:CE40539 | Y71A12B.17
UTGB	GTSSWE202033.01	exon	Y71A12B.15	Y71A12B.15	chrI	13989592	+	36	0	2977	-1	CE40538 | WBGene00013511 | WP:CE40538 | Y71A12B.15
UTGB	GTSSWE202035.01	outron	ZC334.7	ZC334.7	chrI	14008488	+	12	0	1396	1372	CE35203 | WBGene00013865 | WP:CE35203 | ZC334.7
UTGB	GTSSWE202036.01	outron	ins-27	ZC334.11	chrI	14026596	+	22	0	646	627	CE36061 | WBGene00002110 | WP:CE36061 | ZC334.11 | ZC334.11.1 | ZC334.11.2 | ins-27
UTGB	GTSSWE202037.01	exon	ZC334.12	ZC334.12	chrI	14029216	-	20	0	16	-1	CE41087 | WBGene00045396 | WP:CE41087 | ZC334.12
UTGB	GTSSWE202038.01	exon	ins-24	ZC334.3	chrI	14032277	-	49	0	635	-1	CE36062 | WBGene00002107 | WP:CE36062 | ZC334.3 | ins-24
UTGB	GTSSWE202039.02	exon	ins-30	ZC334.2	chrI	14036042	-	11	0	14	-1	CE19308 | WBGene00002113 | WP:CE19308 | ZC334.2 | ins-30
UTGB	GTSSWE202040.01	exon	Y71A12C.3	Y71A12C.3	chrI	14046117	-	16	0	435	-1	WBGene00050878 | Y71A12C.3
UTGB	GTSSWE202041.01	outron	Y71A12C.2	Y71A12C.2	chrI	14048489	-	100	12.93	484	481	CE39303 | WBGene00013513 | WP:CE39303 | Y71A12C.2
UTGB	GTSSWE202043.01	exon	clec-113	F47G4.1	chrI	14058896	-	211	0.9406	2014	-1	CE18700 | F47G4.1 | WBGene00009822 | WP:CE18700 | clec-113
UTGB	GTSSWE202044.03	exon	F47G4.6	F47G4.6	chrI	14058556	+	119	3.318	851	-1	CE34189 | F47G4.6 | WBGene00009827 | WP:CE34189
UTGB	GTSSWE202045.05	outron	F47G4.4	F47G4.4.1	chrI	14069258	-	36	4.253	505	467	CE18702 | F47G4.4 | F47G4.4.1 | F47G4.4.2 | WBGene00009825 | WP:CE18702
UTGB	GTSSWE202046.03	exon	gpdh-1	F47G4.3	chrI	14075826	+	70	0	38	-1	CE18701 | F47G4.3 | WBGene00009824 | WP:CE18701 | gpdh-1
UTGB	GTSSWE202047.09	outron	F47G4.2	F47G4.2	chrI	14082595	-	98	0.9961	260	230	CE19875 | F47G4.2 | WBGene00009823 | WP:CE19875
UTGB	GTSSWE202048.12	exon	fbxb-93	Y63D3A.9	chrI	14084209	-	1132	0.5254	23	-1	CE20341 | WBGene00013408 | WP:CE20341 | Y63D3A.9 | fbxb-93
UTGB	GTSSWE202049.02	outron	fbxb-56	Y63D3A.10	chrI	14082797	+	46	0	1713	1708	CE20332 | WBGene00013409 | WP:CE20332 | Y63D3A.10 | fbxb-56
UTGB	GTSSWE202050.08	exon	fbxb-94	Y63D3A.11	chrI	14086700	-	355	0.7001	27	-1	WBGene00013410 | Y63D3A.11 | fbxb-94
UTGB	GTSSWE202051.01	exon	fbxb-101	Y63D3A.3	chrI	14088064	+	617	2.841	17	-1	CE25528 | WBGene00013404 | WP:CE25528 | Y63D3A.3 | fbxb-101
UTGB	GTSSWE202052.10	exon	fbxb-100	Y63D3A.2	chrI	14096353	-	495	1.391	24	-1	CE20333 | WBGene00013403 | WP:CE20333 | Y63D3A.2 | fbxb-100
UTGB	GTSSWE202053.01	outron	Y63D3A.4	Y63D3A.4	chrI	14101166	-	58	0	95	88	CE20335 | WBGene00013405 | WP:CE20335 | Y63D3A.4
UTGB	GTSSWE202054.01	outron	tfg-1	Y63D3A.5.1	chrI	14101264	+	87	5.453	770	770	CE20336 | WBGene00006565 | WP:CE20336 | Y63D3A.5 | Y63D3A.5.1 | Y63D3A.5.2 | tfg-1
UTGB	GTSSWE202055.05	outron	dnj-29	Y63D3A.6b	chrI	14113156	-	80	13	77	60	CE20337 | CE24546 | WBGene00001047 | WP:CE20337 | WP:CE24546 | Y63D3A.6 | Y63D3A.6a | Y63D3A.6a.1 | Y63D3A.6a.2 | Y63D3A.6b | dnj-29
UTGB	GTSSWE202056.01	outron	Y63D3A.7.3	Y63D3A.7.3	chrI	14113519	+	46	8.311	104	104	CE39300 | WBGene00013406 | WP:CE39300 | Y63D3A.7 | Y63D3A.7.1 | Y63D3A.7.2 | Y63D3A.7.3
UTGB	GTSSWE202057.05	outron	mys-2	K03D10.3	chrI	14118340	+	106	1.716	405	400	CE23850 | K03D10.3 | WBGene00010537 | WP:CE23850 | mys-2
UTGB	GTSSWE202058.06	outron	kal-1	K03D10.1	chrI	14143065	-	558	1.661	873	870	CE35892 | K03D10.1 | WBGene00002181 | WP:CE35892 | kal-1
UTGB	GTSSWE202059.01	exon	fipr-23	C37A5.4	chrI	14155308	-	13	0	1250	-1	C37A5.4 | CE17530 | WBGene00007990 | WP:CE17530 | fipr-23
UTGB	GTSSWE202060.01	outron	fipr-22	C37A5.2	chrI	14154466	+	29	0	1018	605	C37A5.2 | CE17529 | WBGene00007989 | WP:CE17529 | fipr-22
UTGB	GTSSWE202061.01	exon	fipr-24	C37A5.8	chrI	14157599	+	59	0	43	-1	C37A5.8 | C37A5.8.1 | C37A5.8.2 | CE17532 | WBGene00007992 | WP:CE17532 | fipr-24
UTGB	GTSSWE202062.01	outron	C37A5.1	C37A5.1.1	chrI	14161746	-	109	0.6085	98	94	C37A5.1 | C37A5.1.1 | C37A5.1.2 | CE17528 | WBGene00007988 | WP:CE17528
UTGB	GTSSWE202063.02	outron	C37A5.7	C37A5.7.1	chrI	14163268	+	15	0	277	249	C37A5.7 | C37A5.7.1 | C37A5.7.2 | CE37488 | WBGene00007991 | WP:CE37488
UTGB	GTSSWE202064.08	outron	C37A5.9.1	C37A5.9.1	chrI	14179688	-	179	0.4491	344	340	C37A5.9 | C37A5.9.1 | C37A5.9.2 | CE30125 | WBGene00004202 | WP:CE30125 | pry-1
UTGB	GTSSWE202065.01	exon	ZK849.6	ZK849.6	chrI	14199764	-	13	0	769	-1	CE35172 | WBGene00014104 | WP:CE35172 | ZK849.6
UTGB	GTSSWE202066.01	exon	ZK849.5	ZK849.5	chrI	14197987	+	13	0	2221	-1	CE16750 | WBGene00014103 | WP:CE16750 | ZK849.5
UTGB	GTSSWE202067.01	exon	eya-1	C49A1.4a	chrI	14231330	-	73	18.25	100	-1	C49A1.4 | C49A1.4a | C49A1.4b | C49A1.4b.1 | C49A1.4b.2 | CE15722 | CE36113 | WBGene00001377 | WP:CE15722 | WP:CE36113 | eya-1
UTGB	GTSSWE202068.02	exon	C49A1.5	C49A1.5	chrI	14237317	+	12	3.397	69	-1	C49A1.5 | CE15723 | WBGene00008187 | WP:CE15723
UTGB	GTSSWE202069.02	outron	C49A1.10	C49A1.10	chrI	14245027	-	27	0	607	587	C49A1.10 | CE39236 | WBGene00008191 | WP:CE39236
UTGB	GTSSWE202070.04	exon	fbxb-69	F09C3.5	chrI	14285324	-	125	0.4856	17	-1	CE24886 | F09C3.5 | WBGene00008613 | WP:CE24886 | fbxb-69
UTGB	GTSSWE202071.02	outron	fbxb-68	F09C3.3	chrI	14287088	-	184	0.4747	23	11	CE42904 | F09C3.3 | WBGene00008611 | WP:CE42904 | fbxb-68
UTGB	GTSSWE202072.02	exon	fbxa-103	F09C3.4	chrI	14292064	-	32	0	2196	-1	CE09279 | F09C3.4 | WBGene00008612 | WP:CE09279 | fbxa-103
UTGB	GTSSWE202073.05	outron	fbxb-67	F49B2.2	chrI	14297152	+	257	1.093	124	122	CE16073 | F49B2.2 | WBGene00009862 | WP:CE16073 | fbxb-67
UTGB	GTSSWE202074.02	exon	fbxb-8	F49B2.1	chrI	14298729	+	54	2.549	13	-1	CE42945 | F49B2.1 | WBGene00009861 | WP:CE42945 | fbxb-8
UTGB	GTSSWE202075.01	exon	F49B2.3	F49B2.3	chrI	14309906	+	22	0	1090	-1	CE16074 | F49B2.3 | WBGene00009863 | WP:CE16074
UTGB	GTSSWE202076.08	outron	src-2	F49B2.5	chrI	14320674	+	137	2.958	1600	1550	CE24991 | F49B2.5 | WBGene00005078 | WP:CE24991 | kin-22 | src-2
UTGB	GTSSWE202077.01	outron	F49B2.6	F49B2.6	chrI	14330758	+	13	1.015	314	242	CE40456 | F49B2.6 | WBGene00009865 | WP:CE40456
UTGB	GTSSWE202078.02	outron	Y105E8A.1	Y105E8A.1	chrI	14346757	-	13	0	2964	2954	CE36221 | WBGene00013666 | WP:CE36221 | Y105E8A.1 | yrs-2
UTGB	GTSSWE202079.02	outron	Y105E8A.2	Y105E8A.2	chrI	14358410	-	25	3.498	115	97	CE34218 | WBGene00013667 | WP:CE34218 | Y105E8A.2
UTGB	GTSSWE202080.03	exon	Y105E8A.3	Y105E8A.3	chrI	14358537	+	1014	4.246	111	-1	CE32233 | WBGene00013668 | WP:CE32233 | Y105E8A.3
UTGB	GTSSWE202081.02	exon	bbs-1	Y105E8A.5	chrI	14376049	-	35	2.23	44	-1	CE25181 | WBGene00000241 | WP:CE25181 | Y105E8A.5 | bbs-1
UTGB	GTSSWE202082.01	exon	Y105E8A.32	Y105E8A.32	chrI	14381216	-	14	0	1803	-1	CE38439 | WBGene00044264 | WP:CE38439 | Y105E8A.32
UTGB	GTSSWE202083.01	outron	unc-95	Y105E8A.6	chrI	14384944	-	155	1.241	219	219	CE31857 | WBGene00006824 | WP:CE31857 | Y105E8A.6 | unc-95
UTGB	GTSSWE202084.01	outron	lev-10	Y105E8A.7a	chrI	14388290	+	35	4.164	2080	2030	1O991 | CE29845 | CE33723 | CE36334 | CE37055 | CE43607 | WBGene00001147 | WBGene00002977 | WP:CE29845 | WP:CE33723 | WP:CE36334 | WP:CE37055 | WP:CE43607 | Y105E8A.7 | Y105E8A.7a | Y105E8A.7b | Y105E8A.7c | Y105E8A.7d | Y105E8A.7e | eat-18 | lev-10
UTGB	GTSSWE202085.03	outron	Y105E8A.8	Y105E8A.8	chrI	14405715	-	22	0	78	78	CE29846 | WBGene00013669 | WP:CE29846 | Y105E8A.8
UTGB	GTSSWE202086.02	outron	apg-1	Y105E8A.9	chrI	14405824	+	162	4.743	206	191	CE29847 | WBGene00000158 | WP:CE29847 | Y105E8A.9 | apg-1 | apt-1
UTGB	GTSSWE202087.16	exon	Y105E8A.10	Y105E8A.10a	chrI	14417581	+	73	5.777	603	-1	CE25174 | CE29831 | CE36895 | WBGene00013670 | WP:CE25174 | WP:CE29831 | WP:CE36895 | Y105E8A.10 | Y105E8A.10a | Y105E8A.10b | Y105E8A.10c | Y105E8A.10c.1 | Y105E8A.10c.2 | Y105E8A.10c.3
UTGB	GTSSWE202088.01	outron	Y105E8A.11	Y105E8A.11	chrI	14431820	+	16	0.714	960	960	CE25173 | WBGene00013671 | WP:CE25173 | Y105E8A.11 | Y105E8A.11.1 | Y105E8A.11.2
UTGB	GTSSWE202089.01	exon	Y105E8A.34	Y105E8A.34	chrI	14435706	-	64	0	12	-1	WBGene00077689 | Y105E8A.34
UTGB	GTSSWE202090.02	outron	catp-1	Y105E8A.12a	chrI	14451946	-	40	0	146	80	CE41274 | CE41275 | WBGene00013672 | WP:CE41274 | WP:CE41275 | Y105E8A.12 | Y105E8A.12a | Y105E8A.12b | catp-1
UTGB	GTSSWE202091.13	outron	Y105E8A.13	Y105E8A.13	chrI	14465531	-	41	0	404	398	CE42687 | WBGene00013673 | WP:CE42687 | Y105E8A.13
UTGB	GTSSWE202092.01	outron	Y105E8A.14	Y105E8A.14	chrI	14468404	-	11	0	210	202	CE25168 | WBGene00013674 | WP:CE25168 | Y105E8A.14
UTGB	GTSSWE202094.06	outron	ekl-4	Y105E8A.17b	chrI	14469406	+	109	0.5618	87	87	CE29836 | CE41712 | WBGene00013676 | WP:CE29836 | WP:CE41712 | Y105E8A.17 | Y105E8A.17a | Y105E8A.17b | ekl-4
UTGB	GTSSWE202095.01	exon	Y105E8A.19	Y105E8A.19	chrI	14486743	-	38	0	5	-1	CE33722 | WBGene00013677 | WP:CE33722 | Y105E8A.19
UTGB	GTSSWE202097.01	outron	Y105E8A.28	Y105E8A.28	chrI	14499517	-	12	0	1238	1236	CE43853 | WBGene00013685 | WP:CE43853 | Y105E8A.28
UTGB	GTSSWE202098.19	outron	Y105E8A.21	Y105E8A.21.1	chrI	14511575	-	96	9.006	1048	1035	CE25162 | WBGene00013679 | WP:CE25162 | Y105E8A.21 | Y105E8A.21.1 | Y105E8A.21.2
UTGB	GTSSWE202099.13	outron	exc-4	Y105E8A.22	chrI	14520562	-	132	0	1859	1857	CE36222 | WBGene00001365 | WP:CE36222 | Y105E8A.22 | exc-4
UTGB	GTSSWE202100.07	outron	zoo-1	Y105E8A.26b	chrI	14528908	+	76	0.803	611	610	CE38437 | CE38438 | WBGene00013683 | WP:CE38437 | WP:CE38438 | Y105E8A.26 | Y105E8A.26a | Y105E8A.26b | tag-301 | zoo-1
UTGB	GTSSWE202101.01	outron	Y105E8A.23	Y105E8A.23a	chrI	14567307	-	118	6.096	1475	1475	CE41276 | CE41277 | WBGene00013680 | WP:CE41276 | WP:CE41277 | Y105E8A.23 | Y105E8A.23a | Y105E8A.23b
UTGB	GTSSWE202102.12	exon	Y105E8A.24	Y105E8A.24a	chrI	14582211	-	33	2.198	1362	-1	CE29842 | CE34221 | WBGene00013681 | WP:CE29842 | WP:CE34221 | Y105E8A.24 | Y105E8A.24a | Y105E8A.24b
UTGB	GTSSWE202103.08	exon	Y105E8A.29	Y105E8A.29	chrI	14590976	-	29	0	176	-1	CE35056 | WBGene00013686 | WP:CE35056 | Y105E8A.29
UTGB	GTSSWE202104.02	outron	Y105E8A.25	Y105E8A.25	chrI	14604596	-	37	0	1849	1802	CE29843 | WBGene00013682 | WP:CE29843 | Y105E8A.25
UTGB	GTSSWE202105.32	outron	Y105E8B.11	Y105E8B.11	chrI	14621349	-	81	7.227	728	725	CE24090 | WBGene00044265 | WP:CE24090 | Y105E8B.11
UTGB	GTSSWE202106.05	exon	lev-11	Y105E8B.1f	chrI	14631011	-	426	0.4043	64	-1	CE28782 | CE29059 | CE29060 | CE31733 | CE36223 | CE36224 | WBGene00002978 | WP:CE28782 | WP:CE29059 | WP:CE29060 | WP:CE31733 | WP:CE36223 | WP:CE36224 | Y105E8B.1 | Y105E8B.1a | Y105E8B.1b | Y105E8B.1b.1 | Y105E8B.1b.2 | Y105E8B.1b.3 | Y105E8B.1b.4 | Y105E8B.1c | Y105E8B.1d | Y105E8B.1e | Y105E8B.1e.1 | Y105E8B.1e.2 | Y105E8B.1e.3 | Y105E8B.1f | lev-11 | tmy-1
UTGB	GTSSWE202107.06	outron	exoc-8	Y105E8B.2b.1	chrI	14642598	-	295	1.015	49	42	CE28785 | CE34105 | WBGene00013687 | WP:CE28785 | WP:CE34105 | Y105E8B.2 | Y105E8B.2a | Y105E8B.2b | Y105E8B.2b.1 | Y105E8B.2b.2 | exoc-8
UTGB	GTSSWE202108.05	exon	Y105E8B.7	Y105E8B.7	chrI	14642731	+	123	1.049	56	-1	CE41039 | WBGene00013692 | WP:CE41039 | Y105E8B.7
UTGB	GTSSWE202109.01	outron	bath-40	Y105E8B.4	chrI	14646771	+	41	2.593	1009	998	CE24096 | WBGene00013689 | WP:CE24096 | Y105E8B.4 | Y105E8B.4.1 | Y105E8B.4.2 | bath-40
UTGB	GTSSWE202110.19	outron	riok-2	Y105E8B.3	chrI	14651184	+	118	0.4923	919	919	CE33542 | WBGene00013688 | WP:CE33542 | Y105E8B.3 | Y105E8B.3.1 | Y105E8B.3.2 | riok-2
UTGB	GTSSWE202111.01	outron	Y105E8B.5	Y105E8B.5	chrI	14657067	+	117	5.721	316	292	CE24099 | WBGene00013690 | WP:CE24099 | Y105E8B.5
UTGB	GTSSWE202112.01	outron	Y105E8B.6	Y105E8B.6	chrI	14661343	+	12	0	1182	1170	CE24100 | WBGene00013691 | WP:CE24100 | Y105E8B.6
UTGB	GTSSWE202113.10	outron	ero-1	Y105E8B.8a	chrI	14663230	+	38	7.964	1208	1206	CE28787 | CE33847 | CE42762 | WBGene00001334 | WP:CE28787 | WP:CE33847 | WP:CE42762 | Y105E8B.8 | Y105E8B.8a | Y105E8B.8b | Y105E8B.8b.1 | Y105E8B.8b.2 | Y105E8B.8c | ero-1
UTGB	GTSSWE202114.04	outron	Y105E8B.9	Y105E8B.9	chrI	14684119	-	46	0.668	1568	1567	CE28788 | WBGene00013693 | WP:CE28788 | Y105E8B.9
UTGB	GTSSWE202115.12	outron	Y54E5A.1	Y54E5A.1	chrI	14692242	-	110	0	540	520	CE28791 | WBGene00013197 | WP:CE28791 | Y54E5A.1
UTGB	GTSSWE202116.01	exon	Y54E5A.2	Y54E5A.2	chrI	14692637	+	23	0	1520	-1	CE42871 | WBGene00013198 | WP:CE42871 | Y54E5A.2
UTGB	GTSSWE202117.01	exon	Y54E5A.3	Y54E5A.3	chrI	14695667	+	11	0	845	-1	Y54E5A.3
UTGB	GTSSWE202118.03	outron	npp-4	Y54E5A.4.1	chrI	14706965	-	28	0	457	455	CE20315 | WBGene00003790 | WP:CE20315 | Y54E5A.4 | Y54E5A.4.1 | Y54E5A.4.2 | npp-4
UTGB	GTSSWE202119.01	outron	Y54E5A.5.2	Y54E5A.5.2	chrI	14708093	-	43	0	238	230	CE20316 | WBGene00013200 | WP:CE20316 | Y54E5A.5 | Y54E5A.5.1 | Y54E5A.5.2
UTGB	GTSSWE202120.01	outron	Y54E5A.6	Y54E5A.6	chrI	14713052	-	133	0	2135	2134	CE20317 | WBGene00013201 | WP:CE20317 | Y54E5A.6
UTGB	GTSSWE202121.08	exon	Y54E5A.7	Y54E5A.7	chrI	14711098	+	526	3.216	74	-1	CE20318 | WBGene00013202 | WP:CE20318 | Y54E5A.7
UTGB	GTSSWE202122.01	exon	Y54E5A.8	Y54E5A.8a	chrI	14714759	+	54	7.401	1958	-1	CE20319 | CE20320 | WBGene00013203 | WP:CE20319 | WP:CE20320 | Y54E5A.8 | Y54E5A.8a | Y54E5A.8b
UTGB	GTSSWE202123.01	outron	pbs-5	K05C4.1.1	chrI	14720677	-	15	0	227	212	CE19969 | K05C4.1 | K05C4.1.1 | K05C4.1.2 | WBGene00003951 | WP:CE19969 | pbs-5
UTGB	GTSSWE202124.03	outron	K05C4.2	K05C4.2.1	chrI	14721551	-	82	0.8405	224	208	CE19970 | K05C4.2 | K05C4.2.1 | K05C4.2.2 | K05C4.2.3 | WBGene00010579 | WP:CE19970
UTGB	GTSSWE202125.01	outron	K05C4.11	K05C4.11	chrI	14726669	-	28	0	1950	1942	CE19979 | K05C4.11 | WBGene00010587 | WP:CE19979
UTGB	GTSSWE202126.01	exon	K05C4.10	K05C4.10	chrI	14722650	+	23	0	2633	-1	CE19978 | K05C4.10 | WBGene00010586 | WP:CE19978
UTGB	GTSSWE202127.03	outron	K05C4.9	K05C4.9	chrI	14732115	-	1687	0.8005	1408	1404	CE19977 | K05C4.9 | WBGene00010585 | WP:CE19977
UTGB	GTSSWE202128.02	exon	K05C4.8	K05C4.8	chrI	14731810	+	33	0	603	-1	CE19976 | K05C4.8 | WBGene00010584 | WP:CE19976
UTGB	GTSSWE202129.01	outron	K05C4.4	K05C4.4	chrI	14734022	+	11	0	1201	1188	CE19972 | K05C4.4 | WBGene00010581 | WP:CE19972
UTGB	GTSSWE202130.05	outron	K05C4.7	K05C4.7	chrI	14737532	+	141	0.4081	158	157	CE19975 | K05C4.7 | K05C4.7.1 | K05C4.7.2 | WBGene00010583 | WP:CE19975
UTGB	GTSSWE202131.07	outron	hmp-2	K05C4.6	chrI	14738843	+	37	0	735	716	CE19974 | K05C4.6 | K05C4.6.1 | K05C4.6.2 | K05C4.6.3 | WBGene00001979 | WP:CE19974 | hmp-2
UTGB	GTSSWE202132.01	exon	K05C4.5	K05C4.5	chrI	14742793	+	39	0	49	-1	CE44179 | K05C4.5 | K05C4.5.1 | K05C4.5.2 | WBGene00010582 | WP:CE44179
UTGB	GTSSWE202133.04	exon	K05C4.3	K05C4.3	chrI	14753738	-	105	2.05	612	-1	CE42656 | K05C4.3 | WBGene00010580 | WP:CE42656
UTGB	GTSSWE202134.15	exon	mtx-1	F39B2.11	chrI	14756419	-	351	5.349	55	-1	CE16016 | F39B2.11 | WBGene00009559 | WP:CE16016 | mtx-1
UTGB	GTSSWE202135.02	outron	dnj-12	F39B2.10.1	chrI	14756872	+	60	17.72	194	178	CE16015 | F39B2.10 | F39B2.10.1 | F39B2.10.2 | F39B2.10.3 | WBGene00001030 | WP:CE16015 | dnj-12
UTGB	GTSSWE202136.22	outron	F39B2.6.3	F39B2.6.3	chrI	14759584	+	287	0.5802	339	333	CE16012 | F39B2.6 | F39B2.6.1 | F39B2.6.2 | F39B2.6.3 | WBGene00004495 | WP:CE16012 | rps-26
UTGB	GTSSWE202137.03	exon	F39B2.8	F39B2.8	chrI	14768926	-	60	1.359	12	-1	CE30529 | F39B2.8 | WBGene00009558 | WP:CE30529
UTGB	GTSSWE202138.02	outron	F39B2.5	F39B2.5.1	chrI	14777080	-	63	0	455	429	CE34485 | F39B2.5 | F39B2.5.1 | F39B2.5.2 | WBGene00009556 | WP:CE34485
UTGB	GTSSWE202139.04	outron	sur-2	F39B2.4b	chrI	14787848	-	62	1.274	64	56	CE28023 | CE28024 | F39B2.4 | F39B2.4a | F39B2.4b | WBGene00006349 | WP:CE28023 | WP:CE28024 | mdt-23 | sur-2
UTGB	GTSSWE202140.02	outron	F39B2.3	F39B2.3	chrI	14790027	-	199	3.565	557	553	CE16009 | F39B2.3 | WBGene00009554 | WP:CE16009
UTGB	GTSSWE202141.11	outron	uev-1	F39B2.2.1	chrI	14790119	+	71	0.4646	139	120	CE16008 | F39B2.2 | F39B2.2.1 | F39B2.2.2 | F39B2.2.3 | WBGene00006730 | WP:CE16008 | mms-2 | uev-1
UTGB	GTSSWE202142.05	outron	F39B2.1	F39B2.1	chrI	14790970	+	27	0	75	57	CE16007 | F39B2.1 | WBGene00009553 | WP:CE16007
UTGB	GTSSWE202143.01	outron	K11B4.1	K11B4.1	chrI	14794072	+	90	11.63	814	814	CE29597 | K11B4.1 | K11B4.1.1 | K11B4.1.2 | WBGene00010766 | WP:CE29597
UTGB	GTSSWE202144.01	outron	K11B4.2	K11B4.2	chrI	14797160	+	15	0	518	489	CE23868 | K11B4.2 | WBGene00010767 | WP:CE23868
UTGB	GTSSWE202145.03	outron	smp-1	Y54E5B.1a	chrI	14805050	+	137	0.8882	2417	2405	CE19225 | CE29065 | WBGene00004889 | WP:CE19225 | WP:CE29065 | Y54E5B.1 | Y54E5B.1a | Y54E5B.1b | Y54E5B.1b.1 | Y54E5B.1b.2 | cesema | smp-1
UTGB	GTSSWE202146.04	outron	Y54E5B.2	Y54E5B.2	chrI	14820242	-	261	12.85	32	28	CE19226 | WBGene00013204 | WP:CE19226 | Y54E5B.2
UTGB	GTSSWE202147.04	outron	let-49	Y54E5B.3b	chrI	14820338	+	130	6.72	73	61	CE19227 | CE28136 | WBGene00002324 | WP:CE19227 | WP:CE28136 | Y54E5B.3 | Y54E5B.3a | Y54E5B.3b | let-49 | mdt-7 | med-7
UTGB	GTSSWE202148.02	outron	ubc-16	Y54E5B.4	chrI	14821557	+	27	0	499	480	CE19228 | WBGene00006711 | WP:CE19228 | Y54E5B.4 | Y54E5B.4.1 | Y54E5B.4.2 | ubc-16
UTGB	GTSSWE202150.03	exon	F32A7.8	F32A7.8	chrI	14838649	+	31	0.959	255	-1	CE38337 | F32A7.8 | WBGene00044245 | WP:CE38337
UTGB	GTSSWE202151.05	exon	F32A7.4	F32A7.4	chrI	14839891	+	621	3.126	28	-1	CE09845 | F32A7.4 | WBGene00009305 | WP:CE09845
UTGB	GTSSWE202152.22	outron	F32A7.5	F32A7.5a	chrI	14845863	+	73	1.316	602	602	CE09846 | CE34178 | CE34179 | F32A7.5 | F32A7.5a | F32A7.5b | F32A7.5c | WBGene00009306 | WP:CE09846 | WP:CE34178 | WP:CE34179
UTGB	GTSSWE202155.01	exon	str-245	F32A7.7	chrI	14849877	+	104	9.652	2928	-1	CE15940 | F32A7.7 | WBGene00006272 | WP:CE15940 | str-245
UTGB	GTSSWE202153.07	exon	aex-5	F32A7.6	chrI	14856101	-	107	3.213	382	-1	CE28554 | F32A7.6 | WBGene00000088 | WP:CE28554 | aex-5 | kpc-3 | kpc-5
UTGB	GTSSWE202154.04	exon	unc-54	F11C3.3.1	chrI	14863516	-	91	1.513	78	-1	CE09349 | F11C3.3 | F11C3.3.1 | F11C3.3.2 | F11C3.3.3 | WBGene00006789 | WP:CE09349 | myo-4 | unc-54
UTGB	GTSSWE202156.04	exon	F11C3.1	F11C3.1	chrI	14866651	+	58	0	1173	-1	CE43298 | F11C3.1 | WBGene00008695 | WP:CE43298
UTGB	GTSSWE202157.01	exon	unc-122	F11C3.2	chrI	14871760	+	24	0	389	-1	CE20668 | F11C3.2 | WBGene00006845 | WP:CE20668 | cof-1 | ofm-1 | unc-122
UTGB	GTSSWE202158.11	outron	frm-1	ZK270.2a.2	chrI	14897450	-	37	0	100	95	CE34142 | CE34143 | CE34144 | CE34145 | WBGene00001488 | WP:CE34142 | WP:CE34143 | WP:CE34144 | WP:CE34145 | ZK270.2 | ZK270.2a | ZK270.2a.1 | ZK270.2a.2 | ZK270.2a.3 | ZK270.2b | ZK270.2d | ZK270.2e | frm-1
UTGB	GTSSWE202159.07	outron	ptr-23	ZK270.1	chrI	14907416	+	35	0	1848	1813	CE15305 | WBGene00004237 | WP:CE15305 | ZK270.1 | ptr-23
UTGB	GTSSWE202160.03	exon	F21F12.1	F21F12.1.1	chrI	14913640	+	91	15.34	127	-1	CE09546 | F21F12.1 | F21F12.1.1 | F21F12.1.2 | WBGene00009022 | WP:CE09546
UTGB	GTSSWE202161.08	outron	kin-1	ZK909.2h.1	chrI	14918181	+	36	1.171	1341	1339	CE15473 | CE15475 | CE31755 | CE31756 | CE31757 | CE31758 | CE31759 | CE31760 | CE31761 | CE31762 | CE31763 | CE31764 | CE31765 | WBGene00002189 | WP:CE15473 | WP:CE15475 | WP:CE31755 | WP:CE31756 | WP:CE31757 | WP:CE31758 | WP:CE31759 | WP:CE31760 | WP:CE31761 | WP:CE31762 | WP:CE31763 | WP:CE31764 | WP:CE31765 | ZK909.2 | ZK909.2a | ZK909.2b | ZK909.2c | ZK909.2d | ZK909.2e | ZK909.2f | ZK909.2…
UTGB	GTSSWE202162.07	outron	ZK909.3	ZK909.3.1	chrI	14953344	+	20	0	138	133	CE30581 | WBGene00014148 | WP:CE30581 | ZK909.3 | ZK909.3.1 | ZK909.3.2 | ZK909.3.3
UTGB	GTSSWE202163.12	exon	fbxb-70	ZK909.5	chrI	14957084	-	521	0.4937	26	-1	CE41292 | WBGene00014149 | WP:CE41292 | ZK909.5 | fbxb-70
UTGB	GTSSWE202165.03	outron	ZK909.6	ZK909.6	chrI	14965086	+	55	0.6859	2214	2212	CE40189 | WBGene00014150 | WP:CE40189 | ZK909.6
UTGB	GTSSWE202166.01	outron	ZK337.2	ZK337.2	chrI	14975111	+	12	0	300	295	CE30572 | WBGene00013970 | WP:CE30572 | ZK337.2
UTGB	GTSSWE202167.03	exon	tag-4	ZK337.4	chrI	14983153	+	35	0	1329	-1	CE43210 | WBGene00006399 | WP:CE43210 | ZK337.4 | tag-4
UTGB	GTSSWE202168.07	outron	tep-1	ZK337.1b.2	chrI	14994595	+	84	0.8493	165	163	CE16718 | CE34450 | CE34451 | WBGene00013969 | WP:CE16718 | WP:CE34450 | WP:CE34451 | ZK337.1 | ZK337.1a | ZK337.1a.1 | ZK337.1a.2 | ZK337.1b | ZK337.1b.1 | ZK337.1b.2 | ZK337.1c | ZK337.1c.1 | ZK337.1c.2 | tep-1
UTGB	GTSSWE202169.01	exon	mtd-1	ZK337.5	chrI	15001867	+	17	0	4	-1	CE24721 | WBGene00003471 | WP:CE24721 | ZK337.5 | mtd-1
UTGB	GTSSWE202170.01	outron	F33H2.5	F33H2.5	chrI	15013977	-	102	1.275	115	87	CE17767 | F33H2.5 | WBGene00009368 | WP:CE17767
UTGB	GTSSWE202171.02	outron	F33H2.6	F33H2.6	chrI	15017399	-	39	2.092	832	816	CE30528 | F33H2.6 | WBGene00009369 | WP:CE30528
UTGB	GTSSWE202172.03	outron	dog-1	F33H2.1	chrI	15023032	-	60	0	64	58	CE17764 | F33H2.1 | F33H2.1.1 | F33H2.1.2 | WBGene00001049 | WP:CE17764 | dog-1
UTGB	GTSSWE202175.04	exon	F33H2.8	F33H2.8	chrI	15035273	-	140	0	2246	-1	CE37514 | CE42781 | F33H2.8 | F33H2.8a | F33H2.8b | WBGene00009371 | WP:CE37514 | WP:CE42781
UTGB	GTSSWE202176.05	outron	F33H2.3	F33H2.3	chrI	15034130	+	447	0.4621	389	374	CE17766 | F33H2.3 | WBGene00009367 | WP:CE17766
UTGB	GTSSWE202177.09	outron	F31C3.2	F31C3.2a	chrI	15035996	+	199	0.3779	368	366	CE17731 | CE36143 | F31C3.2 | F31C3.2a | F31C3.2b | WBGene00009284 | WP:CE17731 | WP:CE36143
UTGB	GTSSWE202178.04	outron	cyn-5	F31C3.1.1	chrI	15041776	-	227	0.4354	516	514	CE17730 | F31C3.1 | F31C3.1.1 | F31C3.1.2 | WBGene00000881 | WP:CE17730 | cyn-5 | cyp-5
UTGB	GTSSWE202180.04	outron	F31C3.4	F31C3.4	chrI	15052573	-	81	2.062	165	165	CE17733 | F31C3.4 | WBGene00009286 | WP:CE17733
UTGB	GTSSWE202181.02	outron	F31C3.5	F31C3.5	chrI	15052939	+	209	0.8435	73	65	CE17734 | F31C3.5 | WBGene00009287 | WP:CE17734
UTGB	GTSSWE202182.06	exon	F31C3.6	F31C3.6a	chrI	15058880	-	49	1.155	128	-1	CE24930 | F31C3.6 | F31C3.6a | F31C3.6b | WBGene00009288 | WP:CE24930
UTGB	GTSSWE202183.02	outron	2L52.1	2L52.1	chrII	878	+	123	1.236	989	970	2L52.1 | CE32090 | WBGene00007063 | WP:CE32090
UTGB	GTSSWE202184.09	outron	C01B12.4	C01B12.4	chrII	5154	+	36	19.81	1510	1509	C01B12.4 | CE34642 | WBGene00015287 | WP:CE34642
UTGB	GTSSWE202185.01	outron	C01B12.3	C01B12.3	chrII	12605	+	14	0.7682	381	380	C01B12.3 | CE07791 | WBGene00015286 | WP:CE07791
UTGB	GTSSWE202186.03	outron	C01B12.2	C01B12.2	chrII	19148	+	16	0	390	390	C01B12.2 | CE39124 | WBGene00015285 | WP:CE39124
UTGB	GTSSWE202187.02	outron	sqt-2	C01B12.1	chrII	21916	+	40	11.17	1431	1414	C01B12.1 | CE07789 | Rol | WBGene00005017 | WP:CE07789 | col-67 | sqt-2
UTGB	GTSSWE202188.03	exon	C01B12.8	C01B12.8	chrII	24695	+	137	0.9915	76	-1	C01B12.8 | CE07796 | WBGene00015291 | WP:CE07796
UTGB	GTSSWE202189.09	outron	F23F1.4	F23F1.4	chrII	28406	-	263	16.23	126	125	CE41395 | F23F1.4 | WBGene00017745 | WP:CE41395
UTGB	GTSSWE202190.01	outron	F23F1.5	F23F1.5	chrII	34502	-	19	0	2927	2919	CE09605 | F23F1.5 | F23F1.5.1 | F23F1.5.2 | WBGene00017746 | WP:CE09605
UTGB	GTSSWE202191.01	exon	fbxc-54	F23F1.3	chrII	31779	+	135	13.22	46	-1	CE31795 | F23F1.3 | WBGene00017744 | WP:CE31795 | fbxc-54
UTGB	GTSSWE202192.01	outron	F23F1.6	F23F1.6	chrII	38552	-	17	0	1249	1238	CE09606 | F23F1.6 | WBGene00017747 | WP:CE09606
UTGB	GTSSWE202193.01	exon	F23F1.7	F23F1.7	chrII	39506	-	214	0.9561	18	-1	CE29775 | F23F1.7 | WBGene00017748 | WP:CE29775
UTGB	GTSSWE202194.01	outron	F23F1.10	F23F1.10	chrII	42354	-	21	2.159	375	371	CE36433 | F23F1.10 | WBGene00017750 | WP:CE36433
UTGB	GTSSWE202196.05	exon	nfyc-1	F23F1.1	chrII	43882	+	585	8.556	63	-1	CE27996 | F23F1.1 | WBGene00017742 | WP:CE27996 | nfyc-1
UTGB	GTSSWE202197.03	outron	F23F1.9	F23F1.9	chrII	44958	+	25	0	87	82	CE27997 | F23F1.9 | F23F1.9.1 | F23F1.9.2 | WBGene00017749 | WP:CE27997
UTGB	GTSSWE202195.04	outron	rpt-4	F23F1.8a	chrII	46480	-	40	0	347	263	CE09608 | CE29280 | F23F1.8 | F23F1.8a | F23F1.8b | F23F1.8b.1 | F23F1.8b.2 | F23F1.8b.3 | WBGene00004504 | WP:CE09608 | WP:CE29280 | rpt-4
UTGB	GTSSWE202198.11	outron	sptl-1	C23H3.4a.2	chrII	51102	+	41	0	557	550	C23H3.4 | C23H3.4a | C23H3.4a.1 | C23H3.4a.2 | C23H3.4a.3 | C23H3.4b | C23H3.4b.1 | C23H3.4b.2 | CE08323 | CE37749 | WBGene00016020 | WP:CE08323 | WP:CE37749 | sptl-1
UTGB	GTSSWE202199.02	outron	tre-5	C23H3.7	chrII	56132	-	28	0	827	827	C23H3.7 | CE31312 | WBGene00006611 | WP:CE31312 | tre-5 | tre5
UTGB	GTSSWE202200.01	outron	C23H3.3	C23H3.3b	chrII	57545	+	12	0	127	127	C23H3.3 | C23H3.3a | C23H3.3b | CE08322 | CE41870 | WBGene00016019 | WP:CE08322 | WP:CE41870
UTGB	GTSSWE202201.01	outron	C23H3.2	C23H3.2a	chrII	60029	+	16	0	1286	1284	C23H3.2 | C23H3.2a | C23H3.2a.1 | C23H3.2a.2 | C23H3.2b | C23H3.2b.1 | C23H3.2b.2 | C23H3.2b.3 | CE08321 | CE27078 | WBGene00016018 | WP:CE08321 | WP:CE27078
UTGB	GTSSWE202202.02	outron	egl-26	C23H3.1	chrII	66707	+	125	19.35	2974	2947	C23H3.1 | CE08320 | WBGene00001193 | WP:CE08320 | cog-4 | egl-26 | egl-48
UTGB	GTSSWE202203.05	exon	C23H3.9	C23H3.9d	chrII	77500	-	147	1.005	204	-1	C23H3.9 | C23H3.9a | C23H3.9b | C23H3.9c | C23H3.9d | CE32136 | CE32137 | CE35956 | CE36980 | WBGene00016022 | WP:CE32136 | WP:CE32137 | WP:CE35956 | WP:CE36980
UTGB	GTSSWE202204.05	outron	C50D2.6	C50D2.6	chrII	84660	+	24	1.204	192	159	C50D2.6 | CE34768 | WBGene00016809 | WP:CE34768
UTGB	GTSSWE202205.04	outron	C50D2.9	C50D2.9	chrII	92317	-	57	0	797	797	C50D2.9 | C50D2.9.1 | C50D2.9.2 | CE36803 | WBGene00016812 | WP:CE36803
UTGB	GTSSWE202206.02	outron	C50D2.7	C50D2.7.1	chrII	95894	-	35	0	637	624	C50D2.7 | C50D2.7.1 | C50D2.7.2 | CE33040 | WBGene00016810 | WP:CE33040
UTGB	GTSSWE202207.06	outron	C50D2.8	C50D2.8	chrII	98037	-	24	0	94	92	C50D2.8 | CE34769 | WBGene00016811 | WP:CE34769
UTGB	GTSSWE202208.03	outron	C50D2.5	C50D2.5	chrII	98330	+	162	0.779	81	74	C50D2.5 | CE38492 | WBGene00016808 | WP:CE38492
UTGB	GTSSWE202209.04	outron	C50D2.10	C50D2.10	chrII	99832	+	46	1.182	31	18	C50D2.10 | C50D2.10.1 | C50D2.10.2 | CE38696 | WBGene00044420 | WP:CE38696
UTGB	GTSSWE202210.01	outron	col-68	C50D2.4	chrII	102344	+	25	0	2199	2192	C50D2.4 | CE08889 | WBGene00000644 | WP:CE08889 | col-68
UTGB	GTSSWE202211.01	outron	C50D2.2	C50D2.2	chrII	108294	+	23	0	909	895	C50D2.2 | CE08887 | WBGene00016806 | WP:CE08887
UTGB	GTSSWE202212.01	exon	C50D2.1	C50D2.1	chrII	111661	+	65	7.315	26	-1	C50D2.1 | CE27874 | WBGene00016805 | WP:CE27874
UTGB	GTSSWE202214.01	exon	srt-54	K10B4.2	chrII	114401	+	14	0	2815	-1	CE12064 | K10B4.2 | WBGene00019614 | WP:CE12064 | srt-54
UTGB	GTSSWE202213.03	outron	K10B4.3	K10B4.3	chrII	122603	-	55	6.552	1394	1382	CE35995 | K10B4.3 | WBGene00019615 | WP:CE35995
UTGB	GTSSWE202215.01	exon	srd-3	K10B4.5	chrII	131093	-	12	0	2386	-1	CE21069 | K10B4.5 | WBGene00005081 | WP:CE21069 | srd-3
UTGB	GTSSWE202216.03	outron	cwn-1	K10B4.6a	chrII	134173	-	139	4.373	595	581	CE12072 | CE33421 | K10B4.6 | K10B4.6a | K10B4.6b | WBGene00000857 | WP:CE12072 | WP:CE33421 | Wnt-1 | cwn-1
UTGB	GTSSWE202217.02	exon	K10B4.1	K10B4.1	chrII	134295	+	27	0	1171	-1	CE12062 | K10B4.1 | WBGene00019613 | WP:CE12062
UTGB	GTSSWE202218.02	outron	T25D3.4	T25D3.4	chrII	146697	+	19	0	576	546	CE36022 | T25D3.4 | WBGene00020798 | WP:CE36022
UTGB	GTSSWE202219.13	outron	T25D3.3	T25D3.3	chrII	152442	+	62	14.55	260	243	CE36021 | T25D3.3 | WBGene00020797 | WP:CE36021
UTGB	GTSSWE202220.02	outron	T25D3.2	T25D3.2	chrII	156053	-	81	0	45	43	CE19599 | T25D3.2 | WBGene00020796 | WP:CE19599
UTGB	GTSSWE202222.01	outron	T01D1.3	T01D1.3	chrII	175846	-	21	0	207	203	CE12946 | T01D1.3 | T01D1.3.1 | T01D1.3.2 | WBGene00020148 | WP:CE12946
UTGB	GTSSWE202223.01	outron	T01D1.4	T01D1.4	chrII	181036	-	11	0	1984	1942	CE12948 | T01D1.4 | WBGene00020149 | WP:CE12948
UTGB	GTSSWE202225.02	exon	abu-11	T01D1.6	chrII	194558	-	23	0	23	-1	CE28071 | T01D1.6 | WBGene00000034 | WP:CE28071 | abu-11 | pqn-61
UTGB	GTSSWE202226.02	exon	chs-2	F48A11.1	chrII	200530	+	21	0	2929	-1	CE39155 | F48A11.1 | WBGene00000497 | WP:CE39155 | chi-2 | chs-1 | chs-2
UTGB	GTSSWE202227.01	outron	F48A11.4	F48A11.4	chrII	217307	-	110	3.918	690	686	CE44892 | F48A11.4 | F48A11.4.1 | F48A11.4.2 | WBGene00018585 | WP:CE44892
UTGB	GTSSWE202228.22	outron	ubxn-3	F48A11.5b	chrII	221264	-	453	7.947	643	623	CE10730 | CE37017 | F48A11.5 | F48A11.5a | F48A11.5b | WBGene00018586 | WP:CE10730 | WP:CE37017 | ubxn-3
UTGB	GTSSWE202229.08	outron	Y43H11AL.1	Y43H11AL.1.1	chrII	232950	-	108	7.755	232	230	CE32968 | WBGene00021545 | WP:CE32968 | Y43H11AL.1 | Y43H11AL.1.1 | Y43H11AL.1.2 | Y43H11AL.1.3
UTGB	GTSSWE202230.02	outron	Y43H11AL.2	Y43H11AL.2	chrII	240288	-	45	0	2482	2467	CE32969 | WBGene00021546 | WP:CE32969 | Y43H11AL.2
UTGB	GTSSWE202231.01	outron	pqn-85	Y43H11AL.3	chrII	257228	-	787	0.376	2046	2034	CE36034 | WBGene00004166 | WP:CE36034 | Y43H11AL.3 | pqn-85
UTGB	GTSSWE202232.01	outron	cat-2	B0432.5b	chrII	256028	+	10	1.184	2784	2619	B0432.5 | B0432.5a | B0432.5b | CE32103 | CE37742 | WBGene00000296 | WP:CE32103 | WP:CE37742 | cat-2
UTGB	GTSSWE202233.01	outron	B0432.14	B0432.14	chrII	261988	+	11	0	2441	2364	B0432.14 | CE39123 | WBGene00044640 | WP:CE39123
UTGB	GTSSWE202235.02	outron	B0432.9	B0432.9	chrII	283769	-	38	0	86	75	B0432.9 | CE34245 | WBGene00015190 | WP:CE34245
UTGB	GTSSWE202236.02	outron	B0432.10	B0432.10.1	chrII	285765	-	31	0.5797	86	77	B0432.10 | B0432.10.1 | B0432.10.2 | CE07748 | WBGene00015191 | WP:CE07748
UTGB	GTSSWE202237.02	outron	misc-1	B0432.4	chrII	285865	+	95	12.8	767	761	B0432.4 | B0432.4.1 | B0432.4.2 | CE32102 | WBGene00015186 | WP:CE32102 | misc-1
UTGB	GTSSWE202238.01	outron	mrpl-41	B0432.3	chrII	288518	+	11	0	420	420	B0432.3 | B0432.3.1 | B0432.3.2 | CE07741 | WBGene00015185 | WP:CE07741 | mrpl-41
UTGB	GTSSWE202239.01	outron	djr-1.1	B0432.2	chrII	290543	+	27	0	65	38	B0432.2 | B0432.2.1 | B0432.2.2 | CE07740 | WBGene00015184 | WP:CE07740 | djr-1.1
UTGB	GTSSWE202240.03	outron	K01A2.5	K01A2.5	chrII	301277	+	71	0	1137	1127	CE19513 | K01A2.5 | WBGene00019280 | WP:CE19513
UTGB	GTSSWE202241.06	exon	col-69	K01A2.7	chrII	305537	-	63	0	7	-1	CE19515 | K01A2.7 | WBGene00000645 | WP:CE19515 | col-69
UTGB	GTSSWE202242.12	exon	mps-2	K01A2.8d	chrII	312209	-	1144	3.182	52	-1	CE19516 | CE33413 | CE39023 | K01A2.8 | K01A2.8a | K01A2.8c | K01A2.8c.1 | K01A2.8c.2 | K01A2.8d | WBGene00019282 | WP:CE19516 | WP:CE33413 | WP:CE39023 | mps-2
UTGB	GTSSWE202243.15	exon	K01A2.3	K01A2.3	chrII	313597	+	57	0.9766	1561	-1	CE29422 | K01A2.3 | K01A2.3.1 | K01A2.3.2 | WBGene00019278 | WP:CE29422
UTGB	GTSSWE202244.04	outron	K01A2.10	K01A2.10	chrII	323507	-	40	0	412	411	CE19519 | K01A2.10 | WBGene00019284 | WP:CE19519
UTGB	GTSSWE202245.03	exon	sgcb-1	K01A2.1	chrII	326315	+	38	2.208	42	-1	CE35984 | K01A2.1 | WBGene00019277 | WP:CE35984 | sgcb-1
UTGB	GTSSWE202246.02	outron	cbn-1	K01A2.11d	chrII	333949	-	36	0	1438	1436	CE19521 | CE33411 | CE35985 | CE38387 | K01A2.11 | K01A2.11a | K01A2.11b | K01A2.11c | K01A2.11c.1 | K01A2.11c.2 | K01A2.11d | WBGene00019285 | WP:CE19521 | WP:CE33411 | WP:CE35985 | WP:CE38387 | cbn-1
UTGB	GTSSWE202247.08	outron	cpn-2	D1069.2.1	chrII	336557	+	22	8.571	1243	1224	CE38495 | D1069.2 | D1069.2.1 | D1069.2.2 | WBGene00000778 | WP:CE38495 | cpn-2
UTGB	GTSSWE202248.02	outron	D1069.1	D1069.1	chrII	339791	+	35	0	747	732	CE17613 | D1069.1 | WBGene00017036 | WP:CE17613
UTGB	GTSSWE202249.01	exon	D1069.3	D1069.3b	chrII	347818	-	454	17.2	44	-1	CE17615 | CE36992 | D1069.3 | D1069.3a | D1069.3b | WBGene00017037 | WP:CE17615 | WP:CE36992
UTGB	GTSSWE202250.01	outron	D1069.4	D1069.4	chrII	353190	-	16	0	2603	2598	CE17616 | D1069.4 | WBGene00017038 | WP:CE17616
UTGB	GTSSWE202251.02	exon	C41D7.1	C41D7.1	chrII	358447	-	23	0	989	-1	C41D7.1 | CE08656 | WBGene00016560 | WP:CE08656
[truncated: 10,215 more rows]

## Sheet: all TSSs
URL	ID	TSS type	peak local ID	is representative?	gene name	chr	start position	strand	number of aligned reads in the best-fit Gaussian distribution	standard deviation of the best-fit Gaussian distribution	distance to the start codon	distance to the proximal SL1 site
UTGB	GTSSWE200001.01	outron	1	FALSE	Y74C9A.3.1	chrI	12600	-	13	0	2451	2369
UTGB	GTSSWE200001.02	outron	2	FALSE	Y74C9A.3.1	chrI	12508	-	27	1.349	2359	2277
UTGB	GTSSWE200001.03	outron	3	FALSE	Y74C9A.3.1	chrI	11365	-	13	0	1216	1134
UTGB	GTSSWE200001.04	outron	4	FALSE	Y74C9A.3.1	chrI	10880	-	17	0	731	649
UTGB	GTSSWE200001.05	outron	5	TRUE	Y74C9A.3.1	chrI	10640	-	29	0	491	409
UTGB	GTSSWE200001.06	outron	6	FALSE	Y74C9A.3.1	chrI	10527	-	17	0	378	296
UTGB	GTSSWE200001.07	outron	7	FALSE	Y74C9A.3.1	chrI	10518	-	22	0	369	287
UTGB	GTSSWE200001.08	outron	8	FALSE	Y74C9A.3.1	chrI	10402	-	25	3.175	253	171
UTGB	GTSSWE200002.01	outron	1	TRUE	Y74C9A.2.1	chrI	11285	+	16	3.039	356	333
UTGB	GTSSWE200003.01	outron	1	FALSE	Y74C9A.4b	chrI	28256	-	22	0	1477	1474
UTGB	GTSSWE200003.02	outron	2	FALSE	Y74C9A.4b	chrI	28025	-	25	0	1246	1243
UTGB	GTSSWE200003.03	outron	3	FALSE	Y74C9A.4b	chrI	27777	-	21	1.264	998	995
UTGB	GTSSWE200003.04	outron	4	TRUE	Y74C9A.4b	chrI	27287	-	30	0	508	505
UTGB	GTSSWE200003.05	outron	5	FALSE	Y74C9A.4b	chrI	26890	-	23	0	111	108
UTGB	GTSSWE200003.06	outron	6	FALSE	Y74C9A.4b	chrI	26873	-	18	2.548	94	91
UTGB	GTSSWE200004.01	outron	1	TRUE	Y74C9A.5	chrI	35351	-	52	2.349	2868	2808
UTGB	GTSSWE200004.02	outron	2	FALSE	Y74C9A.5	chrI	35251	-	11	0	2768	2708
UTGB	GTSSWE200004.03	outron	3	FALSE	Y74C9A.5	chrI	35060	-	11	0	2577	2517
UTGB	GTSSWE200004.04	outron	4	FALSE	Y74C9A.5	chrI	34866	-	15	0	2383	2323
UTGB	GTSSWE200004.05	outron	5	FALSE	Y74C9A.5	chrI	34038	-	23	0	1555	1495
UTGB	GTSSWE200004.06	outron	6	FALSE	Y74C9A.5	chrI	34012	-	39	0	1529	1469
UTGB	GTSSWE200004.07	outron	7	FALSE	Y74C9A.5	chrI	33710	-	24	0	1227	1167
UTGB	GTSSWE200004.08	outron	8	FALSE	Y74C9A.5	chrI	33693	-	23	0	1210	1150
UTGB	GTSSWE200004.09	outron	9	FALSE	Y74C9A.5	chrI	33687	-	26	0	1204	1144
UTGB	GTSSWE200004.10	outron	10	FALSE	Y74C9A.5	chrI	33379	-	18	0	896	836
UTGB	GTSSWE200004.11	outron	11	FALSE	Y74C9A.5	chrI	32658	-	13	0	175	115
UTGB	GTSSWE200004.12	exon	12	FALSE	Y74C9A.5	chrI	32519	-	11	3.157	36	-1
UTGB	GTSSWE200005.01	exon	1	FALSE	Y74C9A.1	chrI	42460	+	12	0	1273	-1
UTGB	GTSSWE200005.02	exon	2	TRUE	Y74C9A.1	chrI	43530	+	17	0	203	-1
UTGB	GTSSWE200006.01	outron	1	FALSE	Y48G1C.12	chrI	45435	+	16	0	2037	2028
UTGB	GTSSWE200006.02	outron	2	FALSE	Y48G1C.12	chrI	45461	+	11	0	2011	2002
UTGB	GTSSWE200006.03	outron	3	FALSE	Y48G1C.12	chrI	47178	+	16	0	294	285
UTGB	GTSSWE200006.04	outron	4	FALSE	Y48G1C.12	chrI	47189	+	22	0	283	274
UTGB	GTSSWE200006.05	outron	5	TRUE	Y48G1C.12	chrI	47202	+	50	0.6808	270	261
UTGB	GTSSWE200007.01	outron	1	FALSE	Y48G1C.4	chrI	49458	+	15	0	463	463
UTGB	GTSSWE200007.02	outron	2	FALSE	Y48G1C.4	chrI	49481	+	15	0	440	440
UTGB	GTSSWE200007.03	outron	3	FALSE	Y48G1C.4	chrI	49498	+	21	0.8209	423	423
UTGB	GTSSWE200007.04	outron	4	FALSE	Y48G1C.4	chrI	49547	+	20	4.538	374	374
UTGB	GTSSWE200007.05	outron	5	FALSE	Y48G1C.4	chrI	49560	+	11	0.9082	361	361
UTGB	GTSSWE200007.06	outron	6	FALSE	Y48G1C.4	chrI	49580	+	10	0	341	341
UTGB	GTSSWE200007.07	outron	7	TRUE	Y48G1C.4	chrI	49587	+	29	0	334	334
UTGB	GTSSWE200007.08	outron	8	FALSE	Y48G1C.4	chrI	49600	+	24	1.318	321	321
UTGB	GTSSWE200008.01	outron	1	FALSE	Y48G1C.2.1	chrI	69839	+	12	0	2810	2672
UTGB	GTSSWE200008.02	outron	2	FALSE	Y48G1C.2.1	chrI	70146	+	44	0.6816	2503	2365
UTGB	GTSSWE200008.03	outron	3	FALSE	Y48G1C.2.1	chrI	70167	+	116	0.8072	2482	2344
UTGB	GTSSWE200008.04	outron	4	FALSE	Y48G1C.2.1	chrI	70171	+	83	0.7867	2478	2340
UTGB	GTSSWE200008.05	outron	5	FALSE	Y48G1C.2.1	chrI	70174	+	228	0	2475	2337
UTGB	GTSSWE200008.06	outron	6	FALSE	Y48G1C.2.1	chrI	70177	+	232	0.8195	2472	2334
UTGB	GTSSWE200008.07	outron	7	TRUE	Y48G1C.2.1	chrI	70202	+	269	14.36	2447	2309
UTGB	GTSSWE200008.08	outron	8	FALSE	Y48G1C.2.1	chrI	71162	+	23	0.73	1487	1349
UTGB	GTSSWE200008.09	outron	9	FALSE	Y48G1C.2.1	chrI	71230	+	17	0	1419	1281
UTGB	GTSSWE200008.10	outron	10	FALSE	Y48G1C.2.1	chrI	71256	+	14	0	1393	1255
UTGB	GTSSWE200008.11	outron	11	FALSE	Y48G1C.2.1	chrI	71268	+	16	3.597	1381	1243
UTGB	GTSSWE200008.12	outron	12	FALSE	Y48G1C.2.1	chrI	71346	+	18	0	1303	1165
UTGB	GTSSWE200008.13	outron	13	FALSE	Y48G1C.2.1	chrI	71362	+	63	0.5766	1287	1149
UTGB	GTSSWE200008.14	outron	14	FALSE	Y48G1C.2.1	chrI	71368	+	42	2.324	1281	1143
UTGB	GTSSWE200008.15	outron	15	FALSE	Y48G1C.2.1	chrI	71375	+	18	0	1274	1136
UTGB	GTSSWE200008.16	outron	16	FALSE	Y48G1C.2.1	chrI	71421	+	34	0	1228	1090
UTGB	GTSSWE200008.17	outron	17	FALSE	Y48G1C.2.1	chrI	72104	+	16	0	545	407
UTGB	GTSSWE200008.18	outron	18	FALSE	Y48G1C.2.1	chrI	72121	+	54	0	528	390
UTGB	GTSSWE200008.19	outron	19	FALSE	Y48G1C.2.1	chrI	72388	+	14	0.6969	261	123
UTGB	GTSSWE200008.20	outron	20	FALSE	Y48G1C.2.1	chrI	72462	+	18	0	187	49
UTGB	GTSSWE200008.21	exon	21	FALSE	Y48G1C.2.1	chrI	72528	+	23	0	121	-1
UTGB	GTSSWE200009.01	outron	1	FALSE	Y48G1C.10	chrI	80355	+	14	0	1702	868
UTGB	GTSSWE200009.02	outron	2	FALSE	Y48G1C.10	chrI	80367	+	24	1.935	1690	856
UTGB	GTSSWE200009.03	outron	3	FALSE	Y48G1C.10	chrI	80374	+	14	0	1683	849
UTGB	GTSSWE200009.04	outron	4	FALSE	Y48G1C.10	chrI	80384	+	12	1.201	1673	839
UTGB	GTSSWE200009.05	outron	5	FALSE	Y48G1C.10	chrI	80387	+	23	0.61	1670	836
UTGB	GTSSWE200009.06	outron	6	FALSE	Y48G1C.10	chrI	80405	+	13	0	1652	818
UTGB	GTSSWE200009.07	outron	7	FALSE	Y48G1C.10	chrI	80410	+	21	6.402	1647	813
UTGB	GTSSWE200009.08	outron	8	FALSE	Y48G1C.10	chrI	80430	+	21	2.159	1627	793
UTGB	GTSSWE200009.09	outron	9	FALSE	Y48G1C.10	chrI	80436	+	30	0	1621	787
UTGB	GTSSWE200009.10	outron	10	TRUE	Y48G1C.10	chrI	80443	+	41	1.253	1614	780
UTGB	GTSSWE200009.11	outron	11	FALSE	Y48G1C.10	chrI	80641	+	11	2.725	1416	582
UTGB	GTSSWE200009.12	outron	12	FALSE	Y48G1C.10	chrI	80654	+	10	0	1403	569
UTGB	GTSSWE200009.13	outron	13	FALSE	Y48G1C.10	chrI	80734	+	16	1.155	1323	489
UTGB	GTSSWE200009.14	outron	14	FALSE	Y48G1C.10	chrI	80777	+	14	1.536	1280	446
UTGB	GTSSWE200009.15	outron	15	FALSE	Y48G1C.10	chrI	80826	+	16	0	1231	397
UTGB	GTSSWE200009.16	outron	16	FALSE	Y48G1C.10	chrI	80847	+	16	0.8493	1210	376
UTGB	GTSSWE200009.17	outron	17	FALSE	Y48G1C.10	chrI	80884	+	23	0	1173	339
UTGB	GTSSWE200009.18	outron	18	FALSE	Y48G1C.10	chrI	80932	+	11	0	1125	291
UTGB	GTSSWE200009.19	outron	19	FALSE	Y48G1C.10	chrI	81115	+	10	0	942	108
UTGB	GTSSWE200009.20	outron	20	FALSE	Y48G1C.10	chrI	81125	+	14	0	932	98
UTGB	GTSSWE200009.21	exon	21	FALSE	Y48G1C.10	chrI	81342	+	14	0	715	-1
UTGB	GTSSWE200009.22	exon	22	FALSE	Y48G1C.10	chrI	81615	+	16	0	442	-1
UTGB	GTSSWE200009.23	exon	23	FALSE	Y48G1C.10	chrI	81881	+	12	0	176	-1
UTGB	GTSSWE200009.24	exon	24	FALSE	Y48G1C.10	chrI	81914	+	30	0	143	-1
UTGB	GTSSWE200010.01	outron	1	FALSE	Y48G1C.6	chrI	86921	-	27	0	636	627
UTGB	GTSSWE200010.02	outron	2	FALSE	Y48G1C.6	chrI	86404	-	19	0	119	110
UTGB	GTSSWE200010.03	outron	3	TRUE	Y48G1C.6	chrI	86355	-	28	3.53	70	61
UTGB	GTSSWE200010.04	outron	4	FALSE	Y48G1C.6	chrI	86310	-	10	0	25	16
UTGB	GTSSWE200011.01	outron	1	FALSE	Y48G1C.11	chrI	84982	+	11	0	1859	1842
UTGB	GTSSWE200011.02	outron	2	FALSE	Y48G1C.11	chrI	85067	+	19	1.268	1774	1757
UTGB	GTSSWE200011.03	outron	3	FALSE	Y48G1C.11	chrI	85128	+	12	0	1713	1696
UTGB	GTSSWE200011.04	outron	4	FALSE	Y48G1C.11	chrI	85271	+	20	0	1570	1553
UTGB	GTSSWE200011.05	outron	5	FALSE	Y48G1C.11	chrI	85279	+	12	0.7557	1562	1545
UTGB	GTSSWE200011.06	outron	6	FALSE	Y48G1C.11	chrI	85320	+	11	0	1521	1504
UTGB	GTSSWE200011.07	outron	7	FALSE	Y48G1C.11	chrI	85407	+	19	13.48	1434	1417
UTGB	GTSSWE200011.08	outron	8	FALSE	Y48G1C.11	chrI	85452	+	20	0	1389	1372
UTGB	GTSSWE200011.09	outron	9	FALSE	Y48G1C.11	chrI	85961	+	25	0	880	863
UTGB	GTSSWE200011.10	outron	10	FALSE	Y48G1C.11	chrI	86065	+	10	0	776	759
UTGB	GTSSWE200011.11	outron	11	FALSE	Y48G1C.11	chrI	86103	+	12	0	738	721
UTGB	GTSSWE200011.12	outron	12	FALSE	Y48G1C.11	chrI	86207	+	14	0	634	617
UTGB	GTSSWE200011.13	outron	13	FALSE	Y48G1C.11	chrI	86322	+	21	0	519	502
UTGB	GTSSWE200011.14	outron	14	FALSE	Y48G1C.11	chrI	86511	+	15	3.809	330	313
UTGB	GTSSWE200011.15	outron	15	FALSE	Y48G1C.11	chrI	86544	+	23	0	297	280
UTGB	GTSSWE200011.16	outron	16	TRUE	Y48G1C.11	chrI	86559	+	26	0	282	265
UTGB	GTSSWE200011.17	outron	17	FALSE	Y48G1C.11	chrI	86756	+	20	0	85	68
UTGB	GTSSWE200012.01	outron	1	FALSE	Y48G1C.9.2	chrI	90617	+	40	3.12	792	787
UTGB	GTSSWE200012.02	outron	2	FALSE	Y48G1C.9.2	chrI	90660	+	15	0	749	744
UTGB	GTSSWE200012.03	outron	3	FALSE	Y48G1C.9.2	chrI	90677	+	14	2.88	732	727
UTGB	GTSSWE200012.04	outron	4	FALSE	Y48G1C.9.2	chrI	90722	+	33	4.735	687	682
UTGB	GTSSWE200012.05	outron	5	FALSE	Y48G1C.9.2	chrI	90732	+	14	0	677	672
UTGB	GTSSWE200012.06	outron	6	FALSE	Y48G1C.9.2	chrI	90752	+	29	0	657	652
UTGB	GTSSWE200012.07	outron	7	FALSE	Y48G1C.9.2	chrI	91185	+	24	4.372	224	219
UTGB	GTSSWE200012.08	outron	8	TRUE	Y48G1C.9.2	chrI	91237	+	79	16.21	172	167
UTGB	GTSSWE200013.01	outron	1	TRUE	Y48G1C.1	chrI	93029	+	270	15.79	63	54
UTGB	GTSSWE200014.01	exon	1	FALSE	Y48G1C.7	chrI	100843	-	18	4.207	229	-1
UTGB	GTSSWE200014.02	exon	2	FALSE	Y48G1C.7	chrI	100831	-	19	3.647	217	-1
UTGB	GTSSWE200014.03	exon	3	TRUE	Y48G1C.7	chrI	100692	-	34	0	78	-1
UTGB	GTSSWE200014.04	exon	4	FALSE	Y48G1C.7	chrI	100645	-	10	0	31	-1
UTGB	GTSSWE200015.01	outron	1	FALSE	Y48G1C.8	chrI	109261	-	25	0.6996	1501	1095
UTGB	GTSSWE200015.02	outron	2	FALSE	Y48G1C.8	chrI	109259	-	34	1.854	1499	1093
UTGB	GTSSWE200015.03	outron	3	FALSE	Y48G1C.8	chrI	109252	-	42	1.613	1492	1086
UTGB	GTSSWE200015.04	outron	4	FALSE	Y48G1C.8	chrI	109242	-	85	3.491	1482	1076
UTGB	GTSSWE200015.05	outron	5	FALSE	Y48G1C.8	chrI	109226	-	73	4.928	1466	1060
UTGB	GTSSWE200015.06	outron	6	FALSE	Y48G1C.8	chrI	109207	-	72	5.407	1447	1041
UTGB	GTSSWE200015.07	outron	7	FALSE	Y48G1C.8	chrI	109199	-	190	2.977	1439	1033
UTGB	GTSSWE200015.08	outron	8	FALSE	Y48G1C.8	chrI	109190	-	19	1.551	1430	1024
UTGB	GTSSWE200015.09	outron	9	FALSE	Y48G1C.8	chrI	109182	-	79	3.127	1422	1016
UTGB	GTSSWE200015.10	outron	10	FALSE	Y48G1C.8	chrI	109167	-	87	3.78	1407	1001
UTGB	GTSSWE200015.11	outron	11	FALSE	Y48G1C.8	chrI	109150	-	314	2.601	1390	984
UTGB	GTSSWE200015.12	outron	12	FALSE	Y48G1C.8	chrI	109142	-	14	0	1382	976
UTGB	GTSSWE200015.13	outron	13	FALSE	Y48G1C.8	chrI	109128	-	12	1.926	1368	962
UTGB	GTSSWE200015.14	outron	14	FALSE	Y48G1C.8	chrI	109109	-	57	6.823	1349	943
UTGB	GTSSWE200015.15	outron	15	FALSE	Y48G1C.8	chrI	109096	-	81	3.603	1336	930
UTGB	GTSSWE200015.16	outron	16	FALSE	Y48G1C.8	chrI	109084	-	103	9.598	1324	918
UTGB	GTSSWE200015.17	outron	17	FALSE	Y48G1C.8	chrI	109058	-	13	2.645	1298	892
UTGB	GTSSWE200015.18	outron	18	FALSE	Y48G1C.8	chrI	109048	-	22	0	1288	882
UTGB	GTSSWE200015.19	outron	19	FALSE	Y48G1C.8	chrI	109039	-	21	0	1279	873
UTGB	GTSSWE200015.20	outron	20	TRUE	Y48G1C.8	chrI	109000	-	1640	8.591	1240	834
UTGB	GTSSWE200015.21	outron	21	FALSE	Y48G1C.8	chrI	108946	-	137	9.394	1186	780
UTGB	GTSSWE200015.22	outron	22	FALSE	Y48G1C.8	chrI	108924	-	17	0	1164	758
UTGB	GTSSWE200015.23	outron	23	FALSE	Y48G1C.8	chrI	108919	-	18	2.06	1159	753
UTGB	GTSSWE200015.24	outron	24	FALSE	Y48G1C.8	chrI	108914	-	26	0.8493	1154	748
UTGB	GTSSWE200015.25	outron	25	FALSE	Y48G1C.8	chrI	108906	-	35	2.913	1146	740
UTGB	GTSSWE200015.26	outron	26	FALSE	Y48G1C.8	chrI	108893	-	26	7.54	1133	727
UTGB	GTSSWE200015.27	outron	27	FALSE	Y48G1C.8	chrI	108714	-	11	0	954	548
UTGB	GTSSWE200015.28	outron	28	FALSE	Y48G1C.8	chrI	108300	-	13	2.17	540	134
UTGB	GTSSWE200015.29	outron	29	FALSE	Y48G1C.8	chrI	108286	-	12	0	526	120
UTGB	GTSSWE200015.30	outron	30	FALSE	Y48G1C.8	chrI	108238	-	15	0	478	72
UTGB	GTSSWE200015.31	outron	31	FALSE	Y48G1C.8	chrI	108197	-	14	0	437	31
UTGB	GTSSWE200015.32	exon	32	FALSE	Y48G1C.8	chrI	107834	-	10	0	74	-1
UTGB	GTSSWE200016.01	outron	1	FALSE	F53G12.1	chrI	110659	-	36	15.11	614	601
UTGB	GTSSWE200016.02	outron	2	FALSE	F53G12.1	chrI	110564	-	11	0	519	506
UTGB	GTSSWE200016.03	outron	3	FALSE	F53G12.1	chrI	110556	-	32	0	511	498
UTGB	GTSSWE200016.04	outron	4	FALSE	F53G12.1	chrI	110515	-	10	0	470	457
UTGB	GTSSWE200016.05	outron	5	FALSE	F53G12.1	chrI	110491	-	23	0	446	433
UTGB	GTSSWE200016.06	outron	6	FALSE	F53G12.1	chrI	110468	-	11	0	423	410
UTGB	GTSSWE200016.07	outron	7	FALSE	F53G12.1	chrI	110463	-	13	0	418	405
UTGB	GTSSWE200016.08	outron	8	FALSE	F53G12.1	chrI	110426	-	10	0	381	368
UTGB	GTSSWE200016.09	outron	9	FALSE	F53G12.1	chrI	110416	-	26	0.5839	371	358
UTGB	GTSSWE200016.10	outron	10	FALSE	F53G12.1	chrI	110400	-	27	3.396	355	342
UTGB	GTSSWE200016.11	outron	11	FALSE	F53G12.1	chrI	110385	-	55	10.57	340	327
UTGB	GTSSWE200016.12	outron	12	FALSE	F53G12.1	chrI	110324	-	28	9.218	279	266
UTGB	GTSSWE200016.13	outron	13	TRUE	F53G12.1	chrI	110307	-	65	1.697	262	249
UTGB	GTSSWE200016.14	outron	14	FALSE	F53G12.1	chrI	110294	-	24	0.5646	249	236
UTGB	GTSSWE200016.15	outron	15	FALSE	F53G12.1	chrI	110291	-	32	0.7475	246	233
UTGB	GTSSWE200016.16	outron	16	FALSE	F53G12.1	chrI	110286	-	42	1.49	241	228
UTGB	GTSSWE200017.01	outron	1	FALSE	F53G12.10.2	chrI	109747	+	11	0	1308	1291
UTGB	GTSSWE200017.02	outron	2	FALSE	F53G12.10.2	chrI	110481	+	20	0	574	557
UTGB	GTSSWE200017.03	outron	3	TRUE	F53G12.10.2	chrI	110784	+	433	7.106	271	254
UTGB	GTSSWE200017.04	outron	4	FALSE	F53G12.10.2	chrI	110835	+	13	0.7234	220	203
UTGB	GTSSWE200017.05	outron	5	FALSE	F53G12.10.2	chrI	110964	+	21	0	91	74
UTGB	GTSSWE200018.01	exon	1	FALSE	F53G12.9	chrI	112230	+	11	0	135	-1
UTGB	GTSSWE200018.02	exon	2	FALSE	F53G12.9	chrI	112249	+	29	0	116	-1
UTGB	GTSSWE200018.03	exon	3	FALSE	F53G12.9	chrI	112270	+	26	1.954	95	-1
UTGB	GTSSWE200018.04	exon	4	TRUE	F53G12.9	chrI	112285	+	36	5.047	80	-1
UTGB	GTSSWE200018.05	exon	5	FALSE	F53G12.9	chrI	112359	+	26	0	6	-1
UTGB	GTSSWE200018.06	exon	6	FALSE	F53G12.9	chrI	112362	+	28	0.6637	3	-1
UTGB	GTSSWE200019.01	exon	1	TRUE	F53G12.7	chrI	114855	+	12	0	884	-1
UTGB	GTSSWE200020.01	outron	1	TRUE	F53G12.5b	chrI	126113	+	19	0	1184	1179
UTGB	GTSSWE200020.02	outron	2	FALSE	F53G12.5b	chrI	126582	+	14	0	715	710
UTGB	GTSSWE200020.03	outron	3	FALSE	F53G12.5b	chrI	126791	+	15	0	506	501
UTGB	GTSSWE200020.04	outron	4	FALSE	F53G12.5b	chrI	126798	+	11	0	499	494
UTGB	GTSSWE200020.05	outron	5	FALSE	F53G12.5b	chrI	126812	+	16	0	485	480
UTGB	GTSSWE200021.01	exon	1	FALSE	F53G12.4	chrI	133611	+	109	7.19	743	-1
UTGB	GTSSWE200021.02	exon	2	FALSE	F53G12.4	chrI	133675	+	63	15.74	679	-1
UTGB	GTSSWE200021.03	exon	3	FALSE	F53G12.4	chrI	133734	+	15	0	620	-1
UTGB	GTSSWE200021.04	exon	4	FALSE	F53G12.4	chrI	133739	+	20	0	615	-1
UTGB	GTSSWE200021.05	exon	5	FALSE	F53G12.4	chrI	133761	+	49	7.083	593	-1
UTGB	GTSSWE200021.06	exon	6	FALSE	F53G12.4	chrI	133776	+	26	0.8493	578	-1
UTGB	GTSSWE200021.07	exon	7	FALSE	F53G12.4	chrI	133809	+	42	11.59	545	-1
UTGB	GTSSWE200021.08	exon	8	FALSE	F53G12.4	chrI	133848	+	52	1.522	506	-1
UTGB	GTSSWE200021.09	exon	9	FALSE	F53G12.4	chrI	133854	+	10	2.801	500	-1
UTGB	GTSSWE200021.10	exon	10	FALSE	F53G12.4	chrI	133862	+	27	4.689	492	-1
UTGB	GTSSWE200021.11	exon	11	FALSE	F53G12.4	chrI	133877	+	33	15.54	477	-1
UTGB	GTSSWE200021.12	exon	12	FALSE	F53G12.4	chrI	133911	+	13	1.592	443	-1
UTGB	GTSSWE200021.13	exon	13	FALSE	F53G12.4	chrI	133925	+	12	2.716	429	-1
UTGB	GTSSWE200021.14	exon	14	FALSE	F53G12.4	chrI	133936	+	37	3.476	418	-1
UTGB	GTSSWE200021.15	exon	15	FALSE	F53G12.4	chrI	133945	+	70	4.624	409	-1
UTGB	GTSSWE200021.16	exon	16	TRUE	F53G12.4	chrI	133978	+	264	9.794	376	-1
UTGB	GTSSWE200021.17	exon	17	FALSE	F53G12.4	chrI	134014	+	80	1.525	340	-1
UTGB	GTSSWE200021.18	exon	18	FALSE	F53G12.4	chrI	134020	+	24	2.084	334	-1
UTGB	GTSSWE200021.19	exon	19	FALSE	F53G12.4	chrI	134026	+	89	1.647	328	-1
UTGB	GTSSWE200021.20	exon	20	FALSE	F53G12.4	chrI	134035	+	98	3.923	319	-1
UTGB	GTSSWE200021.21	exon	21	FALSE	F53G12.4	chrI	134056	+	88	5.18	298	-1
UTGB	GTSSWE200021.22	exon	22	FALSE	F53G12.4	chrI	134070	+	12	3.955	284	-1
UTGB	GTSSWE200021.23	exon	23	FALSE	F53G12.4	chrI	134075	+	17	1.072	279	-1
UTGB	GTSSWE200021.24	exon	24	FALSE	F53G12.4	chrI	134088	+	10	0.9893	266	-1
UTGB	GTSSWE200021.25	exon	25	FALSE	F53G12.4	chrI	134110	+	13	2.412	244	-1
UTGB	GTSSWE200021.26	exon	26	FALSE	F53G12.4	chrI	134121	+	20	0	233	-1
UTGB	GTSSWE200021.27	exon	27	FALSE	F53G12.4	chrI	134132	+	22	0	222	-1
UTGB	GTSSWE200021.28	exon	28	FALSE	F53G12.4	chrI	134143	+	14	3.397	211	-1
UTGB	GTSSWE200021.29	exon	29	FALSE	F53G12.4	chrI	134148	+	20	0	206	-1
UTGB	GTSSWE200021.30	exon	30	FALSE	F53G12.4	chrI	134160	+	39	1.498	194	-1
UTGB	GTSSWE200021.31	exon	31	FALSE	F53G12.4	chrI	134213	+	28	0	141	-1
UTGB	GTSSWE200021.32	exon	32	FALSE	F53G12.4	chrI	134218	+	24	0	136	-1
UTGB	GTSSWE200021.33	exon	33	FALSE	F53G12.4	chrI	134330	+	24	0	24	-1
UTGB	GTSSWE200021.34	exon	34	FALSE	F53G12.4	chrI	134349	+	17	0.6929	5	-1
UTGB	GTSSWE200022.01	exon	1	TRUE	F53G12.11	chrI	145742	-	14	0	114	-1
UTGB	GTSSWE200022.02	exon	2	FALSE	F53G12.11	chrI	145693	-	11	0	65	-1
UTGB	GTSSWE200023.01	outron	1	FALSE	F56C11.1	chrI	157231	-	17	0	2411	2382
UTGB	GTSSWE200023.02	outron	2	FALSE	F56C11.1	chrI	156744	-	32	0	1924	1895
UTGB	GTSSWE200023.03	outron	3	FALSE	F56C11.1	chrI	156500	-	11	0	1680	1651
UTGB	GTSSWE200023.04	outron	4	FALSE	F56C11.1	chrI	156231	-	31	0	1411	1382
UTGB	GTSSWE200023.05	outron	5	FALSE	F56C11.1	chrI	156185	-	14	0	1365	1336
UTGB	GTSSWE200023.06	outron	6	TRUE	F56C11.1	chrI	155975	-	33	0	1155	1126
UTGB	GTSSWE200023.07	outron	7	FALSE	F56C11.1	chrI	155930	-	29	4.036	1110	1081
UTGB	GTSSWE200023.08	outron	8	FALSE	F56C11.1	chrI	155908	-	22	0	1088	1059
UTGB	GTSSWE200024.01	outron	1	FALSE	F56C11.2	chrI	169775	-	18	0	2958	2955
UTGB	GTSSWE200024.02	outron	2	TRUE	F56C11.2	chrI	169711	-	22	0	2894	2891
UTGB	GTSSWE200024.03	outron	3	FALSE	F56C11.2	chrI	167852	-	18	0	1035	1032
UTGB	GTSSWE200025.01	outron	1	TRUE	F56C11.6a	chrI	171267	+	81	14.07	2155	2145
UTGB	GTSSWE200025.02	outron	2	FALSE	F56C11.6a	chrI	171937	+	30	0	1485	1475
UTGB	GTSSWE200025.03	outron	3	FALSE	F56C11.6a	chrI	171944	+	67	2.26	1478	1468
UTGB	GTSSWE200025.04	outron	4	FALSE	F56C11.6a	chrI	172691	+	24	0	731	721
UTGB	GTSSWE200025.05	outron	5	FALSE	F56C11.6a	chrI	172993	+	17	0	429	419
UTGB	GTSSWE200025.06	outron	6	FALSE	F56C11.6a	chrI	173000	+	16	0	422	412
UTGB	GTSSWE200025.07	outron	7	FALSE	F56C11.6a	chrI	173008	+	17	0	414	404
UTGB	GTSSWE200025.08	outron	8	FALSE	F56C11.6a	chrI	173023	+	25	0.7784	399	389
UTGB	GTSSWE200025.09	outron	9	FALSE	F56C11.6a	chrI	173053	+	10	0	369	359
UTGB	GTSSWE200025.10	outron	10	FALSE	F56C11.6a	chrI	173074	+	16	0	348	338
UTGB	GTSSWE200025.11	outron	11	FALSE	F56C11.6a	chrI	173087	+	10	0	335	325
UTGB	GTSSWE200025.12	outron	12	FALSE	F56C11.6a	chrI	173103	+	21	0	319	309
UTGB	GTSSWE200026.01	outron	1	FALSE	F56C11.5b	chrI	175962	+	10	0	2605	2564
UTGB	GTSSWE200026.02	outron	2	FALSE	F56C11.5b	chrI	176960	+	11	0	1607	1566
UTGB	GTSSWE200026.03	outron	3	FALSE	F56C11.5b	chrI	177501	+	51	6.23	1066	1025
UTGB	GTSSWE200026.04	outron	4	TRUE	F56C11.5b	chrI	177539	+	107	0.487	1028	987
UTGB	GTSSWE200026.05	outron	5	FALSE	F56C11.5b	chrI	177541	+	37	0.7442	1026	985
UTGB	GTSSWE200026.06	outron	6	FALSE	F56C11.5b	chrI	177550	+	68	0	1017	976
UTGB	GTSSWE200026.07	outron	7	FALSE	F56C11.5b	chrI	177721	+	10	0	846	805
UTGB	GTSSWE200026.08	outron	8	FALSE	F56C11.5b	chrI	177732	+	12	0	835	794
UTGB	GTSSWE200026.09	outron	9	FALSE	F56C11.5b	chrI	178510	+	11	0	57	16
UTGB	GTSSWE200027.01	outron	1	TRUE	F56C11.3	chrI	182942	-	34	0.6656	170	169
UTGB	GTSSWE200027.02	outron	2	FALSE	F56C11.3	chrI	182920	-	13	5.489	148	147
UTGB	GTSSWE200028.01	outron	1	FALSE	F56C11.4	chrI	181973	+	15	0	1403	1391
UTGB	GTSSWE200028.02	outron	2	FALSE	F56C11.4	chrI	182028	+	29	0	1348	1336
UTGB	GTSSWE200028.03	outron	3	FALSE	F56C11.4	chrI	182082	+	14	0	1294	1282
UTGB	GTSSWE200028.04	outron	4	FALSE	F56C11.4	chrI	182090	+	14	0	1286	1274
UTGB	GTSSWE200028.05	outron	5	FALSE	F56C11.4	chrI	182284	+	11	0	1092	1080
UTGB	GTSSWE200028.06	outron	6	FALSE	F56C11.4	chrI	183135	+	24	0	241	229
UTGB	GTSSWE200028.07	outron	7	FALSE	F56C11.4	chrI	183143	+	25	0	233	221
UTGB	GTSSWE200028.08	outron	8	FALSE	F56C11.4	chrI	183160	+	12	0.7557	216	204
UTGB	GTSSWE200028.09	outron	9	FALSE	F56C11.4	chrI	183182	+	10	2.178	194	182
UTGB	GTSSWE200028.10	outron	10	TRUE	F56C11.4	chrI	183342	+	84	1.913	34	22
UTGB	GTSSWE200029.01	outron	1	TRUE	K10E9.1	chrI	189094	+	21	0	560	551
UTGB	GTSSWE200029.02	outron	2	FALSE	K10E9.1	chrI	189139	+	16	0	515	506
UTGB	GTSSWE200030.01	exon	1	TRUE	Y48G1BL.2	chrI	202979	+	27	0	58	-1
UTGB	GTSSWE200031.01	exon	1	FALSE	Y48G1BL.7	chrI	208044	+	10	0	1276	-1
UTGB	GTSSWE200031.02	exon	2	FALSE	Y48G1BL.7	chrI	208081	+	15	1.497	1239	-1
UTGB	GTSSWE200031.03	exon	3	FALSE	Y48G1BL.7	chrI	208098	+	13	0	1222	-1
UTGB	GTSSWE200031.04	exon	4	FALSE	Y48G1BL.7	chrI	208105	+	10	0	1215	-1
UTGB	GTSSWE200031.05	exon	5	FALSE	Y48G1BL.7	chrI	208134	+	22	2.29	1186	-1
UTGB	GTSSWE200031.06	exon	6	FALSE	Y48G1BL.7	chrI	208145	+	18	0	1175	-1
UTGB	GTSSWE200031.07	exon	7	FALSE	Y48G1BL.7	chrI	208151	+	11	0	1169	-1
UTGB	GTSSWE200031.08	exon	8	TRUE	Y48G1BL.7	chrI	208163	+	44	3.397	1157	-1
UTGB	GTSSWE200031.09	exon	9	FALSE	Y48G1BL.7	chrI	208187	+	12	2.562	1133	-1
UTGB	GTSSWE200031.10	exon	10	FALSE	Y48G1BL.7	chrI	208205	+	18	0	1115	-1
UTGB	GTSSWE200031.11	exon	11	FALSE	Y48G1BL.7	chrI	209312	+	23	0	8	-1
UTGB	GTSSWE200032.01	exon	1	FALSE	Y48G1BL.1	chrI	215949	+	13	0	232	-1
UTGB	GTSSWE200032.02	exon	2	TRUE	Y48G1BL.1	chrI	215969	+	23	0	212	-1
UTGB	GTSSWE200033.01	exon	1	FALSE	Y48G1BL.6	chrI	221596	-	11	0	21	-1
UTGB	GTSSWE200033.02	exon	2	TRUE	Y48G1BL.6	chrI	221583	-	11	0	8	-1
UTGB	GTSSWE200034.01	exon	1	FALSE	Y48G1BM.7	chrI	240331	-	27	1.826	1309	-1
UTGB	GTSSWE200034.02	exon	2	TRUE	Y48G1BM.7	chrI	240325	-	121	1.224	1303	-1
UTGB	GTSSWE200035.01	exon	1	FALSE	Y48G1BM.8	chrI	254471	-	14	0	2890	-1
UTGB	GTSSWE200035.02	exon	2	TRUE	Y48G1BM.8	chrI	252505	-	1914	0	924	-1
UTGB	GTSSWE200035.03	exon	3	FALSE	Y48G1BM.8	chrI	251594	-	26	0	13	-1
UTGB	GTSSWE200036.01	exon	1	TRUE	Y48G1BM.9	chrI	256678	-	14	0	71	-1
UTGB	GTSSWE200036.02	exon	2	FALSE	Y48G1BM.9	chrI	256625	-	11	0	18	-1
UTGB	GTSSWE200037.01	outron	1	FALSE	Y48G1BR.1	chrI	261753	-	11	0	2597	2595
UTGB	GTSSWE200037.02	outron	2	TRUE	Y48G1BR.1	chrI	261423	-	28	0	2267	2265
UTGB	GTSSWE200037.03	outron	3	FALSE	Y48G1BR.1	chrI	260161	-	10	0	1005	1003
UTGB	GTSSWE200037.04	outron	4	FALSE	Y48G1BR.1	chrI	259445	-	12	0	289	287
UTGB	GTSSWE200038.01	outron	1	FALSE	C53D5.3	chrI	277337	+	10	0	2783	2783
UTGB	GTSSWE200038.02	outron	2	FALSE	C53D5.3	chrI	277370	+	13	0	2750	2750
UTGB	GTSSWE200038.03	outron	3	FALSE	C53D5.3	chrI	277386	+	12	0	2734	2734
UTGB	GTSSWE200038.04	outron	4	FALSE	C53D5.3	chrI	277401	+	17	0	2719	2719
UTGB	GTSSWE200038.05	outron	5	FALSE	C53D5.3	chrI	277709	+	11	0	2411	2411
UTGB	GTSSWE200038.06	outron	6	FALSE	C53D5.3	chrI	277822	+	17	0	2298	2298
UTGB	GTSSWE200038.07	outron	7	FALSE	C53D5.3	chrI	279523	+	10	0	597	597
UTGB	GTSSWE200038.08	outron	8	TRUE	C53D5.3	chrI	279714	+	28	1.89	406	406
UTGB	GTSSWE200039.01	exon	1	FALSE	C53D5.2	chrI	281434	+	15	0	2066	-1
UTGB	GTSSWE200039.02	exon	2	FALSE	C53D5.2	chrI	282362	+	18	0	1138	-1
UTGB	GTSSWE200039.03	exon	3	FALSE	C53D5.2	chrI	282666	+	10	1.184	834	-1
UTGB	GTSSWE200039.04	exon	4	FALSE	C53D5.2	chrI	282759	+	19	0.6586	741	-1
UTGB	GTSSWE200039.05	exon	5	FALSE	C53D5.2	chrI	282814	+	14	0	686	-1
UTGB	GTSSWE200039.06	exon	6	FALSE	C53D5.2	chrI	283161	+	10	0	339	-1
UTGB	GTSSWE200039.07	exon	7	FALSE	C53D5.2	chrI	283186	+	14	0	314	-1
UTGB	GTSSWE200039.08	exon	8	FALSE	C53D5.2	chrI	283249	+	16	0	251	-1
UTGB	GTSSWE200039.09	exon	9	FALSE	C53D5.2	chrI	283300	+	12	0	200	-1
UTGB	GTSSWE200039.10	exon	10	FALSE	C53D5.2	chrI	283360	+	22	0	140	-1
UTGB	GTSSWE200039.11	exon	11	FALSE	C53D5.2	chrI	283367	+	10	0	133	-1
UTGB	GTSSWE200039.12	exon	12	TRUE	C53D5.2	chrI	283405	+	36	2.724	95	-1
UTGB	GTSSWE200039.13	exon	13	FALSE	C53D5.2	chrI	283483	+	32	0	17	-1
UTGB	GTSSWE200040.01	exon	1	TRUE	C53D5.4	chrI	289128	-	395	5.838	52	-1
UTGB	GTSSWE200040.02	exon	2	FALSE	C53D5.4	chrI	289111	-	17	0	35	-1
UTGB	GTSSWE200040.03	exon	3	FALSE	C53D5.4	chrI	289106	-	44	2.563	30	-1
UTGB	GTSSWE200040.04	exon	4	FALSE	C53D5.4	chrI	289100	-	14	1.801	24	-1
UTGB	GTSSWE200040.05	exon	5	FALSE	C53D5.4	chrI	289098	-	388	0.4175	22	-1
UTGB	GTSSWE200040.06	exon	6	FALSE	C53D5.4	chrI	289083	-	35	0	7	-1
UTGB	GTSSWE200041.01	outron	1	FALSE	C53D5.1a	chrI	289187	+	25	4.813	2062	2029
UTGB	GTSSWE200041.02	outron	2	FALSE	C53D5.1a	chrI	289199	+	29	0	2050	2017
UTGB	GTSSWE200041.03	outron	3	FALSE	C53D5.1a	chrI	289208	+	22	0	2041	2008
UTGB	GTSSWE200041.04	outron	4	FALSE	C53D5.1a	chrI	289213	+	20	0	2036	2003
UTGB	GTSSWE200041.05	outron	5	TRUE	C53D5.1a	chrI	289237	+	178	5.873	2012	1979
UTGB	GTSSWE200041.06	outron	6	FALSE	C53D5.1a	chrI	289277	+	13	0	1972	1939
UTGB	GTSSWE200041.07	outron	7	FALSE	C53D5.1a	chrI	289375	+	12	0	1874	1841
UTGB	GTSSWE200041.08	outron	8	FALSE	C53D5.1a	chrI	289784	+	19	0	1465	1432
UTGB	GTSSWE200041.09	outron	9	FALSE	C53D5.1a	chrI	289809	+	19	3.272	1440	1407
UTGB	GTSSWE200041.10	outron	10	FALSE	C53D5.1a	chrI	290046	+	20	0	1203	1170
UTGB	GTSSWE200041.11	outron	11	FALSE	C53D5.1a	chrI	290053	+	34	0	1196	1163
UTGB	GTSSWE200041.12	outron	12	FALSE	C53D5.1a	chrI	290220	+	20	0	1029	996
UTGB	GTSSWE200041.13	outron	13	FALSE	C53D5.1a	chrI	290272	+	15	0	977	944
UTGB	GTSSWE200041.14	outron	14	FALSE	C53D5.1a	chrI	290502	+	18	0	747	714
UTGB	GTSSWE200041.15	outron	15	FALSE	C53D5.1a	chrI	290656	+	14	0	593	560
UTGB	GTSSWE200041.16	outron	16	FALSE	C53D5.1a	chrI	291051	+	12	0	198	165
UTGB	GTSSWE200042.01	outron	1	FALSE	C53D5.5.1	chrI	311385	-	184	9.497	596	581
UTGB	GTSSWE200042.02	outron	2	FALSE	C53D5.5.1	chrI	311351	-	31	16.59	562	547
UTGB	GTSSWE200042.03	outron	3	FALSE	C53D5.5.1	chrI	311294	-	21	1.513	505	490
UTGB	GTSSWE200042.04	outron	4	FALSE	C53D5.5.1	chrI	311291	-	26	2.499	502	487
UTGB	GTSSWE200042.05	outron	5	FALSE	C53D5.5.1	chrI	311286	-	14	5.195	497	482
UTGB	GTSSWE200042.06	outron	6	FALSE	C53D5.5.1	chrI	311282	-	30	3.312	493	478
UTGB	GTSSWE200042.07	outron	7	FALSE	C53D5.5.1	chrI	311278	-	47	1.181	489	474
UTGB	GTSSWE200042.08	outron	8	FALSE	C53D5.5.1	chrI	311256	-	12	0	467	452
UTGB	GTSSWE200042.09	outron	9	FALSE	C53D5.5.1	chrI	311237	-	174	11.21	448	433
UTGB	GTSSWE200042.10	outron	10	FALSE	C53D5.5.1	chrI	311196	-	75	2.171	407	392
UTGB	GTSSWE200042.11	outron	11	FALSE	C53D5.5.1	chrI	311188	-	29	2.238	399	384
UTGB	GTSSWE200042.12	outron	12	FALSE	C53D5.5.1	chrI	311181	-	60	1.728	392	377
UTGB	GTSSWE200042.13	outron	13	FALSE	C53D5.5.1	chrI	311168	-	61	6.835	379	364
UTGB	GTSSWE200042.14	outron	14	FALSE	C53D5.5.1	chrI	311112	-	28	19.46	323	308
UTGB	GTSSWE200042.15	outron	15	FALSE	C53D5.5.1	chrI	310974	-	14	0	185	170
UTGB	GTSSWE200042.16	outron	16	FALSE	C53D5.5.1	chrI	310965	-	42	3.602	176	161
UTGB	GTSSWE200042.17	outron	17	FALSE	C53D5.5.1	chrI	310959	-	25	0	170	155
UTGB	GTSSWE200042.18	outron	18	TRUE	C53D5.5.1	chrI	310951	-	438	0.4319	162	147
UTGB	GTSSWE200042.19	outron	19	FALSE	C53D5.5.1	chrI	310931	-	143	3.072	142	127
UTGB	GTSSWE200042.20	outron	20	FALSE	C53D5.5.1	chrI	310921	-	350	1.268	132	117
UTGB	GTSSWE200042.21	outron	21	FALSE	C53D5.5.1	chrI	310914	-	166	0.53	125	110
UTGB	GTSSWE200042.22	outron	22	FALSE	C53D5.5.1	chrI	310910	-	70	1.193	121	106
UTGB	GTSSWE200042.23	outron	23	FALSE	C53D5.5.1	chrI	310904	-	11	0	115	100
UTGB	GTSSWE200042.24	outron	24	FALSE	C53D5.5.1	chrI	310899	-	42	1.44	110	95
UTGB	GTSSWE200042.25	outron	25	FALSE	C53D5.5.1	chrI	310891	-	342	0.6733	102	87
UTGB	GTSSWE200042.26	outron	26	FALSE	C53D5.5.1	chrI	310888	-	388	0	99	84
UTGB	GTSSWE200042.27	outron	27	FALSE	C53D5.5.1	chrI	310886	-	40	3.888	97	82
UTGB	GTSSWE200042.28	outron	28	FALSE	C53D5.5.1	chrI	310875	-	25	0	86	71
UTGB	GTSSWE200042.29	outron	29	FALSE	C53D5.5.1	chrI	310873	-	184	0.3911	84	69
UTGB	GTSSWE200042.30	outron	30	FALSE	C53D5.5.1	chrI	310864	-	37	2.206	75	60
UTGB	GTSSWE200043.01	outron	1	FALSE	C53D5.6	chrI	316791	-	31	0	1811	1800
UTGB	GTSSWE200043.02	outron	2	FALSE	C53D5.6	chrI	316310	-	15	0	1330	1319
UTGB	GTSSWE200043.03	outron	3	FALSE	C53D5.6	chrI	316303	-	12	0	1323	1312
UTGB	GTSSWE200043.04	outron	4	FALSE	C53D5.6	chrI	316233	-	18	0	1253	1242
UTGB	GTSSWE200043.05	outron	5	FALSE	C53D5.6	chrI	316128	-	14	0	1148	1137
UTGB	GTSSWE200043.06	outron	6	FALSE	C53D5.6	chrI	315798	-	17	0	818	807
UTGB	GTSSWE200043.07	outron	7	FALSE	C53D5.6	chrI	315789	-	17	0	809	798
UTGB	GTSSWE200043.08	outron	8	FALSE	C53D5.6	chrI	315772	-	25	0	792	781
UTGB	GTSSWE200043.09	outron	9	FALSE	C53D5.6	chrI	315732	-	15	1.784	752	741
UTGB	GTSSWE200043.10	outron	10	FALSE	C53D5.6	chrI	315714	-	58	3.018	734	723
UTGB	GTSSWE200043.11	outron	11	FALSE	C53D5.6	chrI	315697	-	28	3.657	717	706
UTGB	GTSSWE200043.12	outron	12	FALSE	C53D5.6	chrI	315630	-	26	0	650	639
UTGB	GTSSWE200043.13	outron	13	FALSE	C53D5.6	chrI	315601	-	21	0	621	610
UTGB	GTSSWE200043.14	outron	14	FALSE	C53D5.6	chrI	315526	-	11	3.168	546	535
UTGB	GTSSWE200043.15	outron	15	FALSE	C53D5.6	chrI	315282	-	40	0	302	291
UTGB	GTSSWE200043.16	outron	16	TRUE	C53D5.6	chrI	315176	-	220	9.109	196	185
UTGB	GTSSWE200043.17	outron	17	FALSE	C53D5.6	chrI	315109	-	16	0	129	118
UTGB	GTSSWE200043.18	outron	18	FALSE	C53D5.6	chrI	315031	-	16	0	51	40
UTGB	GTSSWE200044.01	outron	1	FALSE	Y48G1A.5	chrI	325836	-	21	0	2482	2482
UTGB	GTSSWE200044.02	outron	2	FALSE	Y48G1A.5	chrI	324268	-	30	0	914	914
UTGB	GTSSWE200044.03	outron	3	FALSE	Y48G1A.5	chrI	323653	-	35	0	299	299
UTGB	GTSSWE200044.04	outron	4	TRUE	Y48G1A.5	chrI	323502	-	143	15.85	148	148
UTGB	GTSSWE200044.05	outron	5	FALSE	Y48G1A.5	chrI	323393	-	20	0	39	39
UTGB	GTSSWE200044.06	outron	6	FALSE	Y48G1A.5	chrI	323369	-	17	3.21	15	15
UTGB	GTSSWE200045.01	outron	1	FALSE	Y48G1A.4	chrI	321322	+	17	0	2539	2534
UTGB	GTSSWE200045.02	outron	2	FALSE	Y48G1A.4	chrI	321338	+	12	0	2523	2518
UTGB	GTSSWE200045.03	outron	3	FALSE	Y48G1A.4	chrI	322030	+	21	0	1831	1826
UTGB	GTSSWE200045.04	outron	4	FALSE	Y48G1A.4	chrI	322040	+	14	0	1821	1816
UTGB	GTSSWE200045.05	outron	5	FALSE	Y48G1A.4	chrI	323782	+	34	0	79	74
UTGB	GTSSWE200045.06	outron	6	TRUE	Y48G1A.4	chrI	323789	+	52	1.356	72	67
UTGB	GTSSWE200045.07	outron	7	FALSE	Y48G1A.4	chrI	323793	+	26	1.699	68	63
UTGB	GTSSWE200045.08	outron	8	FALSE	Y48G1A.4	chrI	323816	+	14	1.536	45	40
UTGB	GTSSWE200046.01	outron	1	FALSE	Y48G1A.3	chrI	331129	+	10	0	1485	1483
UTGB	GTSSWE200046.02	outron	2	TRUE	Y48G1A.3	chrI	331191	+	36	1.153	1423	1421
UTGB	GTSSWE200046.03	outron	3	FALSE	Y48G1A.3	chrI	331202	+	32	0	1412	1410
UTGB	GTSSWE200046.04	outron	4	FALSE	Y48G1A.3	chrI	331529	+	10	0	1085	1083
UTGB	GTSSWE200046.05	outron	5	FALSE	Y48G1A.3	chrI	331534	+	19	1.415	1080	1078
UTGB	GTSSWE200046.06	outron	6	FALSE	Y48G1A.3	chrI	331576	+	13	0	1038	1036
UTGB	GTSSWE200046.07	outron	7	FALSE	Y48G1A.3	chrI	331584	+	14	0	1030	1028
UTGB	GTSSWE200046.08	outron	8	FALSE	Y48G1A.3	chrI	331729	+	24	0	885	883
UTGB	GTSSWE200046.09	outron	9	FALSE	Y48G1A.3	chrI	331973	+	19	0	641	639
UTGB	GTSSWE200046.10	outron	10	FALSE	Y48G1A.3	chrI	332246	+	16	0	368	366
UTGB	GTSSWE200046.11	outron	11	FALSE	Y48G1A.3	chrI	332481	+	17	0	133	131
UTGB	GTSSWE200047.01	exon	1	FALSE	Y48G1A.6a	chrI	348407	-	21	6.402	39	-1
UTGB	GTSSWE200047.02	exon	2	TRUE	Y48G1A.6a	chrI	348400	-	90	1.701	32	-1
UTGB	GTSSWE200047.03	exon	3	FALSE	Y48G1A.6a	chrI	348390	-	24	1.244	22	-1
UTGB	GTSSWE200047.04	exon	4	FALSE	Y48G1A.6a	chrI	348382	-	27	1.419	14	-1
UTGB	GTSSWE200048.01	outron	1	FALSE	Y48G1A.2	chrI	347234	+	17	0	344	277
UTGB	GTSSWE200048.02	outron	2	TRUE	Y48G1A.2	chrI	347484	+	306	1.332	94	27
UTGB	GTSSWE200048.03	outron	3	FALSE	Y48G1A.2	chrI	347491	+	35	1.746	87	20
UTGB	GTSSWE200049.01	outron	1	FALSE	Y48G1A.1	chrI	348159	+	25	3.692	379	363
UTGB	GTSSWE200049.02	outron	2	FALSE	Y48G1A.1	chrI	348174	+	53	3.425	364	348
UTGB	GTSSWE200049.03	outron	3	FALSE	Y48G1A.1	chrI	348180	+	49	0.8882	358	342
UTGB	GTSSWE200049.04	outron	4	FALSE	Y48G1A.1	chrI	348187	+	14	0	351	335
UTGB	GTSSWE200049.05	outron	5	FALSE	Y48G1A.1	chrI	348213	+	17	0	325	309
UTGB	GTSSWE200049.06	outron	6	TRUE	Y48G1A.1	chrI	348493	+	119	1.044	45	29
UTGB	GTSSWE200050.01	outron	1	FALSE	R119.1	chrI	366384	-	18	5.642	2479	2473
UTGB	GTSSWE200050.02	outron	2	TRUE	R119.1	chrI	366256	-	33	0	2351	2345
UTGB	GTSSWE200050.03	outron	3	FALSE	R119.1	chrI	365376	-	32	0	1471	1465
UTGB	GTSSWE200051.01	outron	1	FALSE	R119.7	chrI	362667	+	15	0	1855	1853
UTGB	GTSSWE200051.02	outron	2	TRUE	R119.7	chrI	364354	+	24	1.318	168	166
UTGB	GTSSWE200052.01	exon	1	FALSE	R119.2	chrI	373452	-	29	0	1815	-1
UTGB	GTSSWE200052.02	exon	2	TRUE	R119.2	chrI	373440	-	30	0	1803	-1
UTGB	GTSSWE200052.03	exon	3	FALSE	R119.2	chrI	371986	-	17	0	349	-1
UTGB	GTSSWE200053.01	outron	1	FALSE	R119.4	chrI	383113	-	15	0	1208	1207
UTGB	GTSSWE200053.02	outron	2	TRUE	R119.4	chrI	382469	-	421	0.7936	564	563
UTGB	GTSSWE200053.03	outron	3	FALSE	R119.4	chrI	382454	-	133	0	549	548
UTGB	GTSSWE200053.04	outron	4	FALSE	R119.4	chrI	382446	-	31	2.494	541	540
UTGB	GTSSWE200053.05	outron	5	FALSE	R119.4	chrI	382440	-	97	0.5894	535	534
UTGB	GTSSWE200053.06	outron	6	FALSE	R119.4	chrI	382436	-	20	0	531	530
UTGB	GTSSWE200053.07	outron	7	FALSE	R119.4	chrI	382433	-	74	1.544	528	527
UTGB	GTSSWE200053.08	outron	8	FALSE	R119.4	chrI	382428	-	10	0	523	522
UTGB	GTSSWE200053.09	outron	9	FALSE	R119.4	chrI	382392	-	10	0	487	486
UTGB	GTSSWE200053.10	outron	10	FALSE	R119.4	chrI	382371	-	27	0	466	465
UTGB	GTSSWE200053.11	outron	11	FALSE	R119.4	chrI	382337	-	17	0	432	431
UTGB	GTSSWE200053.12	outron	12	FALSE	R119.4	chrI	382275	-	13	0	370	369
UTGB	GTSSWE200053.13	outron	13	FALSE	R119.4	chrI	382258	-	23	0	353	352
UTGB	GTSSWE200053.14	outron	14	FALSE	R119.4	chrI	382233	-	23	1.376	328	327
UTGB	GTSSWE200053.15	outron	15	FALSE	R119.4	chrI	382122	-	17	0	217	216
UTGB	GTSSWE200053.16	outron	16	FALSE	R119.4	chrI	382079	-	30	0	174	173
UTGB	GTSSWE200053.17	outron	17	FALSE	R119.4	chrI	382066	-	68	1.442	161	160
UTGB	GTSSWE200053.18	outron	18	FALSE	R119.4	chrI	382027	-	25	0	122	121
UTGB	GTSSWE200053.19	outron	19	FALSE	R119.4	chrI	381957	-	11	0	52	51
UTGB	GTSSWE200054.01	outron	1	TRUE	R119.3	chrI	379179	-	12	0	106	102
UTGB	GTSSWE200055.01	outron	1	FALSE	R119.6	chrI	380257	+	106	0	2579	2574
UTGB	GTSSWE200055.02	outron	2	FALSE	R119.6	chrI	381611	+	26	0	1225	1220
UTGB	GTSSWE200055.03	outron	3	FALSE	R119.6	chrI	381867	+	11	0	969	964
UTGB	GTSSWE200055.04	outron	4	FALSE	R119.6	chrI	382548	+	22	0	288	283
UTGB	GTSSWE200055.05	outron	5	FALSE	R119.6	chrI	382569	+	23	1.004	267	262
UTGB	GTSSWE200055.06	outron	6	FALSE	R119.6	chrI	382572	+	66	0.5416	264	259
UTGB	GTSSWE200055.07	outron	7	FALSE	R119.6	chrI	382583	+	160	0.4784	253	248
UTGB	GTSSWE200055.08	outron	8	TRUE	R119.6	chrI	382590	+	579	1.378	246	241
UTGB	GTSSWE200055.09	outron	9	FALSE	R119.6	chrI	382600	+	154	2.897	236	231
UTGB	GTSSWE200055.10	outron	10	FALSE	R119.6	chrI	382689	+	13	4.999	147	142
UTGB	GTSSWE200055.11	outron	11	FALSE	R119.6	chrI	382731	+	10	3.552	105	100
UTGB	GTSSWE200055.12	outron	12	FALSE	R119.6	chrI	382760	+	10	0	76	71
UTGB	GTSSWE200055.13	outron	13	FALSE	R119.6	chrI	382773	+	24	0.5646	63	58
UTGB	GTSSWE200055.14	outron	14	FALSE	R119.6	chrI	382802	+	12	4.968	34	29
UTGB	GTSSWE200055.15	outron	15	FALSE	R119.6	chrI	382815	+	18	0	21	16
UTGB	GTSSWE200056.01	outron	1	FALSE	R119.5	chrI	395433	-	13	5.19	1018	1016
UTGB	GTSSWE200056.02	outron	2	FALSE	R119.5	chrI	395298	-	52	0	883	881
UTGB	GTSSWE200056.03	outron	3	FALSE	R119.5	chrI	395288	-	23	0	873	871
UTGB	GTSSWE200056.04	outron	4	FALSE	R119.5	chrI	395269	-	24	0	854	852
UTGB	GTSSWE200056.05	outron	5	FALSE	R119.5	chrI	395264	-	28	0	849	847
UTGB	GTSSWE200056.06	outron	6	FALSE	R119.5	chrI	395259	-	50	0	844	842
UTGB	GTSSWE200056.07	outron	7	TRUE	R119.5	chrI	395255	-	82	1.506	840	838
UTGB	GTSSWE200056.08	outron	8	FALSE	R119.5	chrI	395230	-	16	0	815	813
UTGB	GTSSWE200056.09	outron	9	FALSE	R119.5	chrI	394672	-	11	0	257	255
UTGB	GTSSWE200056.10	outron	10	FALSE	R119.5	chrI	394621	-	28	4.255	206	204
UTGB	GTSSWE200056.11	outron	11	FALSE	R119.5	chrI	394609	-	11	0	194	192
UTGB	GTSSWE200057.01	outron	1	FALSE	Y50C1A.1	chrI	396104	+	16	0	2848	2790
UTGB	GTSSWE200057.02	outron	2	FALSE	Y50C1A.1	chrI	396130	+	28	0	2822	2764
UTGB	GTSSWE200057.03	outron	3	FALSE	Y50C1A.1	chrI	397930	+	40	0.7644	1022	964
UTGB	GTSSWE200057.04	outron	4	FALSE	Y50C1A.1	chrI	397937	+	18	3.166	1015	957
UTGB	GTSSWE200057.05	outron	5	FALSE	Y50C1A.1	chrI	397941	+	59	1.121	1011	953
UTGB	GTSSWE200057.06	outron	6	FALSE	Y50C1A.1	chrI	397961	+	26	2.412	991	933
UTGB	GTSSWE200057.07	outron	7	FALSE	Y50C1A.1	chrI	397968	+	142	1.21	984	926
UTGB	GTSSWE200057.08	outron	8	FALSE	Y50C1A.1	chrI	397973	+	12	1.656	979	921
UTGB	GTSSWE200057.09	outron	9	FALSE	Y50C1A.1	chrI	397978	+	78	1.406	974	916
UTGB	GTSSWE200057.10	outron	10	FALSE	Y50C1A.1	chrI	398003	+	13	0	949	891
UTGB	GTSSWE200057.11	outron	11	FALSE	Y50C1A.1	chrI	398007	+	53	2.714	945	887
UTGB	GTSSWE200057.12	outron	12	FALSE	Y50C1A.1	chrI	398019	+	13	9.997	933	875
UTGB	GTSSWE200057.13	outron	13	FALSE	Y50C1A.1	chrI	398026	+	292	0.8345	926	868
UTGB	GTSSWE200057.14	outron	14	TRUE	Y50C1A.1	chrI	398063	+	345	12.45	889	831
UTGB	GTSSWE200057.15	outron	15	FALSE	Y50C1A.1	chrI	398235	+	25	0	717	659
UTGB	GTSSWE200057.16	outron	16	FALSE	Y50C1A.1	chrI	398405	+	31	0	547	489
UTGB	GTSSWE200057.17	outron	17	FALSE	Y50C1A.1	chrI	398617	+	32	1.699	335	277
UTGB	GTSSWE200057.18	outron	18	FALSE	Y50C1A.1	chrI	398626	+	11	4.581	326	268
UTGB	GTSSWE200057.19	outron	19	FALSE	Y50C1A.1	chrI	398694	+	20	0	258	200
UTGB	GTSSWE200057.20	outron	20	FALSE	Y50C1A.1	chrI	398699	+	30	0	253	195
UTGB	GTSSWE200057.21	outron	21	FALSE	Y50C1A.1	chrI	398708	+	19	0	244	186
UTGB	GTSSWE200057.22	outron	22	FALSE	Y50C1A.1	chrI	398711	+	24	0	241	183
UTGB	GTSSWE200057.23	outron	23	FALSE	Y50C1A.1	chrI	398724	+	22	0	228	170
UTGB	GTSSWE200057.24	outron	24	FALSE	Y50C1A.1	chrI	398877	+	22	0	75	17
UTGB	GTSSWE200057.25	exon	25	FALSE	Y50C1A.1	chrI	398908	+	23	0	44	-1
UTGB	GTSSWE200057.26	exon	26	FALSE	Y50C1A.1	chrI	398914	+	20	1.754	38	-1
UTGB	GTSSWE200057.27	exon	27	FALSE	Y50C1A.1	chrI	398924	+	36	0.6006	28	-1
UTGB	GTSSWE200057.28	exon	28	FALSE	Y50C1A.1	chrI	398928	+	16	0	24	-1
UTGB	GTSSWE200057.29	exon	29	FALSE	Y50C1A.1	chrI	398933	+	13	0	19	-1
UTGB	GTSSWE200057.30	exon	30	FALSE	Y50C1A.1	chrI	398942	+	10	0	10	-1
UTGB	GTSSWE200057.31	exon	31	FALSE	Y50C1A.1	chrI	398948	+	29	0.5931	4	-1
UTGB	GTSSWE200058.01	outron	1	TRUE	C07F11.2	chrI	418504	+	74	0	2433	2425
UTGB	GTSSWE200059.01	outron	1	FALSE	C07F11.1	chrI	441155	+	25	1.88	2866	2847
UTGB	GTSSWE200059.02	outron	2	FALSE	C07F11.1	chrI	441166	+	22	0.5809	2855	2836
UTGB	GTSSWE200059.03	outron	3	FALSE	C07F11.1	chrI	441190	+	33	0.9965	2831	2812
UTGB	GTSSWE200059.04	outron	4	FALSE	C07F11.1	chrI	441275	+	11	0	2746	2727
UTGB	GTSSWE200059.05	outron	5	FALSE	C07F11.1	chrI	441284	+	13	0.8987	2737	2718
UTGB	GTSSWE200059.06	outron	6	FALSE	C07F11.1	chrI	441292	+	16	0	2729	2710
UTGB	GTSSWE200059.07	outron	7	FALSE	C07F11.1	chrI	441451	+	14	0	2570	2551
UTGB	GTSSWE200059.08	outron	8	FALSE	C07F11.1	chrI	441496	+	15	0	2525	2506
UTGB	GTSSWE200059.09	outron	9	FALSE	C07F11.1	chrI	441514	+	12	0	2507	2488
UTGB	GTSSWE200059.10	outron	10	FALSE	C07F11.1	chrI	441586	+	24	15.71	2435	2416
UTGB	GTSSWE200059.11	outron	11	FALSE	C07F11.1	chrI	441669	+	10	0	2352	2333
UTGB	GTSSWE200059.12	outron	12	FALSE	C07F11.1	chrI	441676	+	16	0	2345	2326
UTGB	GTSSWE200059.13	outron	13	FALSE	C07F11.1	chrI	441685	+	15	0	2336	2317
UTGB	GTSSWE200059.14	outron	14	FALSE	C07F11.1	chrI	441701	+	18	0	2320	2301
UTGB	GTSSWE200059.15	outron	15	FALSE	C07F11.1	chrI	441711	+	13	0	2310	2291
UTGB	GTSSWE200059.16	outron	16	FALSE	C07F11.1	chrI	441716	+	15	0	2305	2286
UTGB	GTSSWE200059.17	outron	17	FALSE	C07F11.1	chrI	441730	+	20	0	2291	2272
UTGB	GTSSWE200059.18	outron	18	FALSE	C07F11.1	chrI	441741	+	25	0	2280	2261
UTGB	GTSSWE200059.19	outron	19	FALSE	C07F11.1	chrI	441752	+	15	10.77	2269	2250
UTGB	GTSSWE200059.20	outron	20	FALSE	C07F11.1	chrI	441810	+	15	3.957	2211	2192
UTGB	GTSSWE200059.21	outron	21	FALSE	C07F11.1	chrI	441819	+	32	2.179	2202	2183
UTGB	GTSSWE200059.22	outron	22	FALSE	C07F11.1	chrI	441825	+	10	0	2196	2177
UTGB	GTSSWE200059.23	outron	23	FALSE	C07F11.1	chrI	442105	+	13	1.608	1916	1897
UTGB	GTSSWE200059.24	outron	24	FALSE	C07F11.1	chrI	442745	+	16	0	1276	1257
UTGB	GTSSWE200059.25	outron	25	FALSE	C07F11.1	chrI	443029	+	10	0	992	973
UTGB	GTSSWE200059.26	outron	26	FALSE	C07F11.1	chrI	443163	+	16	0	858	839
UTGB	GTSSWE200059.27	outron	27	FALSE	C07F11.1	chrI	443196	+	22	0	825	806
UTGB	GTSSWE200059.28	outron	28	FALSE	C07F11.1	chrI	443290	+	14	0	731	712
UTGB	GTSSWE200059.29	outron	29	FALSE	C07F11.1	chrI	443340	+	26	0	681	662
UTGB	GTSSWE200059.30	outron	30	FALSE	C07F11.1	chrI	443345	+	40	1.901	676	657
UTGB	GTSSWE200059.31	outron	31	FALSE	C07F11.1	chrI	443363	+	53	0	658	639
UTGB	GTSSWE200059.32	outron	32	TRUE	C07F11.1	chrI	443676	+	58	17.48	345	326
UTGB	GTSSWE200059.33	outron	33	FALSE	C07F11.1	chrI	443681	+	42	2.281	340	321
UTGB	GTSSWE200059.34	outron	34	FALSE	C07F11.1	chrI	443689	+	28	0.9452	332	313
UTGB	GTSSWE200059.35	outron	35	FALSE	C07F11.1	chrI	443703	+	48	6.715	318	299
UTGB	GTSSWE200059.36	outron	36	FALSE	C07F11.1	chrI	443772	+	12	0	249	230
UTGB	GTSSWE200059.37	exon	37	FALSE	C07F11.1	chrI	444014	+	14	2.68	7	-1
UTGB	GTSSWE200060.01	outron	1	FALSE	W04C9.4	chrI	461216	+	32	7.495	787	782
UTGB	GTSSWE200060.02	outron	2	FALSE	W04C9.4	chrI	461243	+	23	16.85	760	755
UTGB	GTSSWE200060.03	outron	3	FALSE	W04C9.4	chrI	461281	+	35	1.201	722	717
UTGB	GTSSWE200060.04	outron	4	FALSE	W04C9.4	chrI	461289	+	16	2.181	714	709
UTGB	GTSSWE200060.05	outron	5	FALSE	W04C9.4	chrI	461298	+	30	0.8919	705	700
UTGB	GTSSWE200060.06	outron	6	FALSE	W04C9.4	chrI	461305	+	12	0	698	693
UTGB	GTSSWE200060.07	outron	7	FALSE	W04C9.4	chrI	461313	+	10	0	690	685
UTGB	GTSSWE200060.08	outron	8	FALSE	W04C9.4	chrI	461315	+	34	0.6929	688	683
UTGB	GTSSWE200060.09	outron	9	FALSE	W04C9.4	chrI	461319	+	56	1.521	684	679
UTGB	GTSSWE200060.10	outron	10	FALSE	W04C9.4	chrI	461325	+	21	0.5903	678	673
UTGB	GTSSWE200060.11	outron	11	FALSE	W04C9.4	chrI	461328	+	14	0	675	670
UTGB	GTSSWE200060.12	outron	12	FALSE	W04C9.4	chrI	461333	+	23	1.979	670	665
UTGB	GTSSWE200060.13	outron	13	FALSE	W04C9.4	chrI	461336	+	27	1.153	667	662
UTGB	GTSSWE200060.14	outron	14	FALSE	W04C9.4	chrI	461340	+	31	1.914	663	658
UTGB	GTSSWE200060.15	outron	15	FALSE	W04C9.4	chrI	461345	+	78	3.227	658	653
UTGB	GTSSWE200060.16	outron	16	FALSE	W04C9.4	chrI	461353	+	18	7.01	650	645
UTGB	GTSSWE200060.17	outron	17	FALSE	W04C9.4	chrI	461378	+	84	5.372	625	620
UTGB	GTSSWE200060.18	outron	18	TRUE	W04C9.4	chrI	461391	+	212	4.817	612	607
UTGB	GTSSWE200060.19	outron	19	FALSE	W04C9.4	chrI	461407	+	100	5.948	596	591
UTGB	GTSSWE200060.20	outron	20	FALSE	W04C9.4	chrI	461448	+	21	9.853	555	550
UTGB	GTSSWE200060.21	outron	21	FALSE	W04C9.4	chrI	461510	+	21	0	493	488
UTGB	GTSSWE200060.22	outron	22	FALSE	W04C9.4	chrI	461635	+	19	0	368	363
UTGB	GTSSWE200060.23	outron	23	FALSE	W04C9.4	chrI	461683	+	12	0	320	315
UTGB	GTSSWE200060.24	outron	24	FALSE	W04C9.4	chrI	461798	+	11	0	205	200
UTGB	GTSSWE200060.25	outron	25	FALSE	W04C9.4	chrI	461803	+	18	0	200	195
UTGB	GTSSWE200060.26	outron	26	FALSE	W04C9.4	chrI	461895	+	10	0	108	103
UTGB	GTSSWE200061.01	exon	1	FALSE	W04C9.3	chrI	476621	+	10	0	1085	-1
UTGB	GTSSWE200061.02	exon	2	TRUE	W04C9.3	chrI	477586	+	392	10.69	120	-1
UTGB	GTSSWE200062.01	outron	1	FALSE	W04C9.2	chrI	488460	+	12	0	159	150
UTGB	GTSSWE200062.02	outron	2	TRUE	W04C9.2	chrI	488483	+	39	3.332	136	127
UTGB	GTSSWE200062.03	outron	3	FALSE	W04C9.2	chrI	488525	+	34	0	94	85
UTGB	GTSSWE200063.01	exon	1	FALSE	W04C9.1	chrI	489776	+	16	0	278	-1
UTGB	GTSSWE200063.02	exon	2	FALSE	W04C9.1	chrI	489789	+	10	0	265	-1
UTGB	GTSSWE200063.03	exon	3	FALSE	W04C9.1	chrI	489859	+	25	5.988	195	-1
UTGB	GTSSWE200063.04	exon	4	FALSE	W04C9.1	chrI	489872	+	34	0	182	-1
UTGB	GTSSWE200063.05	exon	5	FALSE	W04C9.1	chrI	489899	+	31	0	155	-1
UTGB	GTSSWE200063.06	exon	6	TRUE	W04C9.1	chrI	489999	+	102	8.355	55	-1
UTGB	GTSSWE200063.07	exon	7	FALSE	W04C9.1	chrI	490027	+	28	14	27	-1
UTGB	GTSSWE200064.01	outron	1	TRUE	Y65B4BL.3	chrI	502069	-	19	0	35	23
UTGB	GTSSWE200065.01	outron	1	FALSE	Y65B4BL.4	chrI	508806	-	12	0	2590	2583
UTGB	GTSSWE200065.02	outron	2	FALSE	Y65B4BL.4	chrI	508777	-	16	0	2561	2554
UTGB	GTSSWE200065.03	outron	3	FALSE	Y65B4BL.4	chrI	507166	-	23	0	950	943
UTGB	GTSSWE200065.04	outron	4	FALSE	Y65B4BL.4	chrI	506281	-	26	0	65	58
UTGB	GTSSWE200065.05	outron	5	FALSE	Y65B4BL.4	chrI	506253	-	11	3.157	37	30
UTGB	GTSSWE200065.06	outron	6	FALSE	Y65B4BL.4	chrI	506248	-	37	1.138	32	25
UTGB	GTSSWE200065.07	outron	7	FALSE	Y65B4BL.4	chrI	506243	-	17	1.119	27	20
UTGB	GTSSWE200065.08	outron	8	TRUE	Y65B4BL.4	chrI	506239	-	44	4.664	23	16
UTGB	GTSSWE200066.01	outron	1	FALSE	Y65B4BL.2	chrI	506396	+	22	0	84	78
UTGB	GTSSWE200066.02	outron	2	TRUE	Y65B4BL.2	chrI	506443	+	115	2.259	37	31
UTGB	GTSSWE200066.03	outron	3	FALSE	Y65B4BL.2	chrI	506459	+	20	0	21	15
UTGB	GTSSWE200067.01	outron	1	FALSE	Y65B4BL.7	chrI	511462	-	33	8.733	621	523
UTGB	GTSSWE200067.02	outron	2	FALSE	Y65B4BL.7	chrI	511424	-	18	2.666	583	485
UTGB	GTSSWE200067.03	outron	3	FALSE	Y65B4BL.7	chrI	511403	-	30	11	562	464
UTGB	GTSSWE200067.04	outron	4	FALSE	Y65B4BL.7	chrI	511374	-	53	9.463	533	435
UTGB	GTSSWE200067.05	outron	5	FALSE	Y65B4BL.7	chrI	511367	-	71	2.386	526	428
UTGB	GTSSWE200067.06	outron	6	FALSE	Y65B4BL.7	chrI	511356	-	75	4.126	515	417
UTGB	GTSSWE200067.07	outron	7	FALSE	Y65B4BL.7	chrI	511305	-	71	17.58	464	366
UTGB	GTSSWE200067.08	outron	8	FALSE	Y65B4BL.7	chrI	511266	-	123	9.981	425	327
UTGB	GTSSWE200067.09	outron	9	TRUE	Y65B4BL.7	chrI	511238	-	182	5.747	397	299
UTGB	GTSSWE200067.10	outron	10	FALSE	Y65B4BL.7	chrI	511198	-	103	8.328	357	259
UTGB	GTSSWE200067.11	outron	11	FALSE	Y65B4BL.7	chrI	511158	-	65	12.13	317	219
UTGB	GTSSWE200068.01	outron	1	FALSE	Y65B4BL.5	chrI	518687	-	79	1.703	2289	2227
UTGB	GTSSWE200068.02	outron	2	FALSE	Y65B4BL.5	chrI	518669	-	25	3.175	2271	2209
UTGB	GTSSWE200068.03	outron	3	FALSE	Y65B4BL.5	chrI	518661	-	24	3.202	2263	2201
UTGB	GTSSWE200068.04	outron	4	FALSE	Y65B4BL.5	chrI	518624	-	22	0	2226	2164
UTGB	GTSSWE200068.05	outron	5	FALSE	Y65B4BL.5	chrI	518611	-	32	3.955	2213	2151
UTGB	GTSSWE200068.06	outron	6	FALSE	Y65B4BL.5	chrI	518597	-	24	0	2199	2137
UTGB	GTSSWE200068.07	outron	7	FALSE	Y65B4BL.5	chrI	518588	-	25	0	2190	2128
UTGB	GTSSWE200068.08	outron	8	FALSE	Y65B4BL.5	chrI	518582	-	17	0	2184	2122
UTGB	GTSSWE200068.09	outron	9	FALSE	Y65B4BL.5	chrI	518574	-	17	2.172	2176	2114
UTGB	GTSSWE200068.10	outron	10	FALSE	Y65B4BL.5	chrI	518565	-	556	0.4667	2167	2105
UTGB	GTSSWE200068.11	outron	11	TRUE	Y65B4BL.5	chrI	518563	-	4108	0.3628	2165	2103
UTGB	GTSSWE200068.12	outron	12	FALSE	Y65B4BL.5	chrI	518559	-	390	1.013	2161	2099
UTGB	GTSSWE200068.13	outron	13	FALSE	Y65B4BL.5	chrI	518554	-	580	1.004	2156	2094
UTGB	GTSSWE200068.14	outron	14	FALSE	Y65B4BL.5	chrI	518549	-	358	0.7828	2151	2089
UTGB	GTSSWE200068.15	outron	15	FALSE	Y65B4BL.5	chrI	518546	-	14	1.801	2148	2086
UTGB	GTSSWE200068.16	outron	16	FALSE	Y65B4BL.5	chrI	518535	-	533	2.96	2137	2075
UTGB	GTSSWE200068.17	outron	17	FALSE	Y65B4BL.5	chrI	518519	-	137	4.944	2121	2059
UTGB	GTSSWE200068.18	outron	18	FALSE	Y65B4BL.5	chrI	518479	-	20	0	2081	2019
UTGB	GTSSWE200068.19	outron	19	FALSE	Y65B4BL.5	chrI	518461	-	14	0	2063	2001
UTGB	GTSSWE200068.20	outron	20	FALSE	Y65B4BL.5	chrI	518408	-	31	0	2010	1948
UTGB	GTSSWE200068.21	outron	21	FALSE	Y65B4BL.5	chrI	518345	-	14	0	1947	1885
UTGB	GTSSWE200068.22	outron	22	FALSE	Y65B4BL.5	chrI	518336	-	14	0	1938	1876
UTGB	GTSSWE200068.23	outron	23	FALSE	Y65B4BL.5	chrI	518311	-	30	2.43	1913	1851
UTGB	GTSSWE200068.24	outron	24	FALSE	Y65B4BL.5	chrI	517954	-	20	0	1556	1494
UTGB	GTSSWE200068.25	outron	25	FALSE	Y65B4BL.5	chrI	517945	-	30	3.809	1547	1485
UTGB	GTSSWE200068.26	outron	26	FALSE	Y65B4BL.5	chrI	517869	-	34	0	1471	1409
UTGB	GTSSWE200068.27	outron	27	FALSE	Y65B4BL.5	chrI	517784	-	38	18.27	1386	1324
UTGB	GTSSWE200068.28	outron	28	FALSE	Y65B4BL.5	chrI	517704	-	12	0	1306	1244
UTGB	GTSSWE200068.29	outron	29	FALSE	Y65B4BL.5	chrI	517610	-	19	0	1212	1150
UTGB	GTSSWE200068.30	outron	30	FALSE	Y65B4BL.5	chrI	517326	-	11	0	928	866
UTGB	GTSSWE200068.31	outron	31	FALSE	Y65B4BL.5	chrI	517318	-	11	9.162	920	858
UTGB	GTSSWE200068.32	outron	32	FALSE	Y65B4BL.5	chrI	517164	-	10	0	766	704
UTGB	GTSSWE200068.33	outron	33	FALSE	Y65B4BL.5	chrI	517101	-	18	0	703	641
UTGB	GTSSWE200068.34	outron	34	FALSE	Y65B4BL.5	chrI	517058	-	11	0	660	598
UTGB	GTSSWE200068.35	outron	35	FALSE	Y65B4BL.5	chrI	517050	-	18	1.17	652	590
UTGB	GTSSWE200068.36	outron	36	FALSE	Y65B4BL.5	chrI	517022	-	15	0	624	562
UTGB	GTSSWE200068.37	outron	37	FALSE	Y65B4BL.5	chrI	517013	-	24	0	615	553
UTGB	GTSSWE200068.38	outron	38	FALSE	Y65B4BL.5	chrI	517003	-	15	0	605	543
UTGB	GTSSWE200068.39	outron	39	FALSE	Y65B4BL.5	chrI	516977	-	10	0	579	517
UTGB	GTSSWE200068.40	outron	40	FALSE	Y65B4BL.5	chrI	516849	-	12	1.926	451	389
UTGB	GTSSWE200068.41	outron	41	FALSE	Y65B4BL.5	chrI	516840	-	11	0	442	380
UTGB	GTSSWE200068.42	outron	42	FALSE	Y65B4BL.5	chrI	516694	-	28	9.913	296	234
UTGB	GTSSWE200068.43	outron	43	FALSE	Y65B4BL.5	chrI	516636	-	13	0	238	176
UTGB	GTSSWE200068.44	outron	44	FALSE	Y65B4BL.5	chrI	516590	-	64	13.65	192	130
UTGB	GTSSWE200069.01	exon	1	FALSE	Y65B4BL.6a	chrI	521394	-	22	0	41	-1
UTGB	GTSSWE200069.02	exon	2	TRUE	Y65B4BL.6a	chrI	521354	-	27	0	1	-1
UTGB	GTSSWE200070.01	exon	1	FALSE	Y65B4BL.1	chrI	527605	+	24	3.87	2964	-1
UTGB	GTSSWE200070.02	exon	2	FALSE	Y65B4BL.1	chrI	529983	+	15	0	586	-1
UTGB	GTSSWE200070.03	exon	3	FALSE	Y65B4BL.1	chrI	530051	+	27	0.9223	518	-1
UTGB	GTSSWE200070.04	exon	4	FALSE	Y65B4BL.1	chrI	530561	+	12	0.8493	8	-1
UTGB	GTSSWE200070.05	exon	5	TRUE	Y65B4BL.1	chrI	530565	+	274	0.8482	4	-1
UTGB	GTSSWE200071.01	outron	1	FALSE	Y65B4BR.8	chrI	532930	+	18	0	1531	1528
UTGB	GTSSWE200071.02	outron	2	TRUE	Y65B4BR.8	chrI	533092	+	70	0.6573	1369	1366
UTGB	GTSSWE200071.03	outron	3	FALSE	Y65B4BR.8	chrI	533098	+	47	1.251	1363	1360
UTGB	GTSSWE200071.04	outron	4	FALSE	Y65B4BR.8	chrI	533102	+	20	0	1359	1356
UTGB	GTSSWE200071.05	outron	5	FALSE	Y65B4BR.8	chrI	533116	+	39	4.464	1345	1342
UTGB	GTSSWE200071.06	outron	6	FALSE	Y65B4BR.8	chrI	533128	+	28	1.504	1333	1330
UTGB	GTSSWE200071.07	outron	7	FALSE	Y65B4BR.8	chrI	533136	+	11	6.198	1325	1322
UTGB	GTSSWE200071.08	outron	8	FALSE	Y65B4BR.8	chrI	533171	+	11	0	1290	1287
UTGB	GTSSWE200071.09	outron	9	FALSE	Y65B4BR.8	chrI	533244	+	13	0	1217	1214
UTGB	GTSSWE200071.10	outron	10	FALSE	Y65B4BR.8	chrI	533471	+	11	0	990	987
UTGB	GTSSWE200071.11	outron	11	FALSE	Y65B4BR.8	chrI	533634	+	15	0	827	824
UTGB	GTSSWE200071.12	outron	12	FALSE	Y65B4BR.8	chrI	534373	+	26	0.8042	88	85
UTGB	GTSSWE200071.13	outron	13	FALSE	Y65B4BR.8	chrI	534381	+	23	0	80	77
UTGB	GTSSWE200071.14	outron	14	FALSE	Y65B4BR.8	chrI	534391	+	14	2.438	70	67
UTGB	GTSSWE200071.15	outron	15	FALSE	Y65B4BR.8	chrI	534441	+	36	2.024	20	17
UTGB	GTSSWE200072.01	outron	1	FALSE	Y65B4BR.5b	chrI	535280	+	11	0	531	514
UTGB	GTSSWE200072.02	outron	2	FALSE	Y65B4BR.5b	chrI	535312	+	39	0	499	482
UTGB	GTSSWE200072.03	outron	3	FALSE	Y65B4BR.5b	chrI	535507	+	19	1.317	304	287
UTGB	GTSSWE200072.04	outron	4	FALSE	Y65B4BR.5b	chrI	535523	+	14	0	288	271
UTGB	GTSSWE200072.05	outron	5	FALSE	Y65B4BR.5b	chrI	535528	+	44	0.6404	283	266
UTGB	GTSSWE200072.06	outron	6	TRUE	Y65B4BR.5b	chrI	535535	+	84	1.487	276	259
UTGB	GTSSWE200072.07	outron	7	FALSE	Y65B4BR.5b	chrI	535541	+	32	1.555	270	253
UTGB	GTSSWE200072.08	outron	8	FALSE	Y65B4BR.5b	chrI	535768	+	14	0	43	26
UTGB	GTSSWE200073.01	outron	1	FALSE	Y65B4BR.4a	chrI	536527	+	11	0	614	598
UTGB	GTSSWE200073.02	outron	2	FALSE	Y65B4BR.4a	chrI	536530	+	19	0.9565	611	595
UTGB	GTSSWE200073.03	outron	3	FALSE	Y65B4BR.4a	chrI	536555	+	15	0	586	570
UTGB	GTSSWE200073.04	outron	4	FALSE	Y65B4BR.4a	chrI	536579	+	29	1.962	562	546
UTGB	GTSSWE200073.05	outron	5	FALSE	Y65B4BR.4a	chrI	536618	+	28	0	523	507
UTGB	GTSSWE200073.06	outron	6	FALSE	Y65B4BR.4a	chrI	536632	+	21	0	509	493
UTGB	GTSSWE200073.07	outron	7	FALSE	Y65B4BR.4a	chrI	536638	+	23	0	503	487
UTGB	GTSSWE200073.08	outron	8	FALSE	Y65B4BR.4a	chrI	536679	+	23	0	462	446
UTGB	GTSSWE200073.09	outron	9	FALSE	Y65B4BR.4a	chrI	536691	+	22	0	450	434
UTGB	GTSSWE200073.10	outron	10	FALSE	Y65B4BR.4a	chrI	536718	+	44	0	423	407
UTGB	GTSSWE200073.11	outron	11	FALSE	Y65B4BR.4a	chrI	536894	+	36	0	247	231
UTGB	GTSSWE200073.12	outron	12	FALSE	Y65B4BR.4a	chrI	536898	+	43	0.5453	243	227
UTGB	GTSSWE200073.13	outron	13	FALSE	Y65B4BR.4a	chrI	536900	+	26	0	241	225
UTGB	GTSSWE200073.14	outron	14	FALSE	Y65B4BR.4a	chrI	536908	+	28	1.463	233	217
UTGB	GTSSWE200073.15	outron	15	FALSE	Y65B4BR.4a	chrI	536918	+	20	0.7913	223	207
UTGB	GTSSWE200073.16	outron	16	TRUE	Y65B4BR.4a	chrI	536946	+	1140	8.425	195	179
UTGB	GTSSWE200073.17	outron	17	FALSE	Y65B4BR.4a	chrI	537091	+	22	0	50	34
UTGB	GTSSWE200073.18	outron	18	FALSE	Y65B4BR.4a	chrI	537097	+	23	0	44	28
UTGB	GTSSWE200074.01	outron	1	TRUE	Y65B4BR.3	chrI	550258	+	39	0	453	441
UTGB	GTSSWE200074.02	outron	2	FALSE	Y65B4BR.3	chrI	550271	+	11	0	440	428
UTGB	GTSSWE200074.03	outron	3	FALSE	Y65B4BR.3	chrI	550278	+	14	0	433	421
UTGB	GTSSWE200074.04	outron	4	FALSE	Y65B4BR.3	chrI	550400	+	12	0	311	299
UTGB	GTSSWE200074.05	outron	5	FALSE	Y65B4BR.3	chrI	550463	+	21	0	248	236
UTGB	GTSSWE200075.01	exon	1	FALSE	Y65B4BR.2	chrI	556389	+	18	4.442	1120	-1
UTGB	GTSSWE200075.02	exon	2	FALSE	Y65B4BR.2	chrI	556397	+	15	0	1112	-1
UTGB	GTSSWE200075.03	exon	3	FALSE	Y65B4BR.2	chrI	556426	+	15	6.718	1083	-1
UTGB	GTSSWE200075.04	exon	4	FALSE	Y65B4BR.2	chrI	556472	+	24	17.59	1037	-1
UTGB	GTSSWE200075.05	exon	5	FALSE	Y65B4BR.2	chrI	556831	+	18	0	678	-1
UTGB	GTSSWE200075.06	exon	6	FALSE	Y65B4BR.2	chrI	556858	+	18	11.83	651	-1
UTGB	GTSSWE200075.07	exon	7	FALSE	Y65B4BR.2	chrI	557304	+	11	0	205	-1
UTGB	GTSSWE200075.08	exon	8	FALSE	Y65B4BR.2	chrI	557426	+	122	0.9076	83	-1
UTGB	GTSSWE200075.09	exon	9	FALSE	Y65B4BR.2	chrI	557431	+	39	1.891	78	-1
UTGB	GTSSWE200075.10	exon	10	TRUE	Y65B4BR.2	chrI	557451	+	1549	3.325	58	-1
UTGB	GTSSWE200075.11	exon	11	FALSE	Y65B4BR.2	chrI	557465	+	12	0	44	-1
UTGB	GTSSWE200075.12	exon	12	FALSE	Y65B4BR.2	chrI	557468	+	305	0.3931	41	-1
UTGB	GTSSWE200075.13	exon	13	FALSE	Y65B4BR.2	chrI	557470	+	42	0	39	-1
UTGB	GTSSWE200075.14	exon	14	FALSE	Y65B4BR.2	chrI	557474	+	28	2.391	35	-1
UTGB	GTSSWE200075.15	exon	15	FALSE	Y65B4BR.2	chrI	557482	+	86	1.98	27	-1
UTGB	GTSSWE200075.16	exon	16	FALSE	Y65B4BR.2	chrI	557488	+	471	1.109	21	-1
UTGB	GTSSWE200075.17	exon	17	FALSE	Y65B4BR.2	chrI	557492	+	28	0	17	-1
UTGB	GTSSWE200075.18	exon	18	FALSE	Y65B4BR.2	chrI	557501	+	46	2.126	8	-1
UTGB	GTSSWE200076.01	exon	1	TRUE	Y65B4BR.1	chrI	561573	+	13	0	1193	-1
UTGB	GTSSWE200077.01	exon	1	TRUE	Y65B4BR.9	chrI	566409	-	17	0	14	-1
UTGB	GTSSWE200077.02	exon	2	FALSE	Y65B4BR.9	chrI	566405	-	13	0	10	-1
UTGB	GTSSWE200078.01	exon	1	FALSE	Y65B4BR.6a	chrI	575112	-	18	1.152	42	-1
UTGB	GTSSWE200078.02	exon	2	TRUE	Y65B4BR.6a	chrI	575096	-	21	0	26	-1
UTGB	GTSSWE200078.03	exon	3	FALSE	Y65B4BR.6a	chrI	575074	-	20	1.583	4	-1
UTGB	GTSSWE200079.01	outron	1	TRUE	F56A6.2	chrI	609006	-	12	0	1431	1401
UTGB	GTSSWE200080.01	outron	1	FALSE	F56A6.4	chrI	631095	-	38	3.771	1647	1647
UTGB	GTSSWE200080.02	outron	2	FALSE	F56A6.4	chrI	631066	-	19	0	1618	1618
UTGB	GTSSWE200080.03	outron	3	FALSE	F56A6.4	chrI	630999	-	20	0	1551	1551
UTGB	GTSSWE200080.04	outron	4	FALSE	F56A6.4	chrI	630943	-	10	0.9893	1495	1495
UTGB	GTSSWE200080.05	outron	5	FALSE	F56A6.4	chrI	630899	-	17	0	1451	1451
UTGB	GTSSWE200080.06	outron	6	FALSE	F56A6.4	chrI	630504	-	25	9.466	1056	1056
UTGB	GTSSWE200080.07	outron	7	TRUE	F56A6.4	chrI	630411	-	40	16.04	963	963
UTGB	GTSSWE200080.08	outron	8	FALSE	F56A6.4	chrI	630086	-	20	0	638	638
UTGB	GTSSWE200080.09	outron	9	FALSE	F56A6.4	chrI	630078	-	14	0	630	630
UTGB	GTSSWE200080.10	outron	10	FALSE	F56A6.4	chrI	629878	-	13	0	430	430
UTGB	GTSSWE200080.11	outron	11	FALSE	F56A6.4	chrI	629717	-	10	2.968	269	269
UTGB	GTSSWE200080.12	outron	12	FALSE	F56A6.4	chrI	629574	-	14	0	126	126
UTGB	GTSSWE200081.01	outron	1	TRUE	Y65B4A.6	chrI	636779	-	277	10.9	441	425
UTGB	GTSSWE200081.02	outron	2	FALSE	Y65B4A.6	chrI	636583	-	14	0	245	229
UTGB	GTSSWE200082.01	exon	1	FALSE	Y65B4A.3	chrI	636854	+	16	2.856	85	-1
UTGB	GTSSWE200082.02	exon	2	FALSE	Y65B4A.3	chrI	636859	+	18	0	80	-1
UTGB	GTSSWE200082.03	exon	3	TRUE	Y65B4A.3	chrI	636862	+	292	0.7823	77	-1
UTGB	GTSSWE200082.04	exon	4	FALSE	Y65B4A.3	chrI	636865	+	271	1.241	74	-1
UTGB	GTSSWE200082.05	exon	5	FALSE	Y65B4A.3	chrI	636869	+	58	1.98	70	-1
UTGB	GTSSWE200082.06	exon	6	FALSE	Y65B4A.3	chrI	636878	+	216	1.663	61	-1
UTGB	GTSSWE200082.07	exon	7	FALSE	Y65B4A.3	chrI	636880	+	33	2.78	59	-1
UTGB	GTSSWE200082.08	exon	8	FALSE	Y65B4A.3	chrI	636889	+	112	19.38	50	-1
UTGB	GTSSWE200083.01	outron	1	FALSE	Y65B4A.2	chrI	642958	+	12	0	2498	2496
UTGB	GTSSWE200083.02	outron	2	TRUE	Y65B4A.2	chrI	644855	+	16	0	601	599
UTGB	GTSSWE200084.01	outron	1	FALSE	Y65B4A.1	chrI	653864	+	20	0	267	259
UTGB	GTSSWE200084.02	outron	2	FALSE	Y65B4A.1	chrI	654047	+	10	0	84	76
UTGB	GTSSWE200084.03	outron	3	TRUE	Y65B4A.1	chrI	654093	+	152	0.5437	38	30
UTGB	GTSSWE200084.04	outron	4	FALSE	Y65B4A.1	chrI	654096	+	121	0.7522	35	27
UTGB	GTSSWE200084.05	outron	5	FALSE	Y65B4A.1	chrI	654099	+	17	0	32	24
UTGB	GTSSWE200085.01	exon	1	FALSE	Y65B4A.8.1	chrI	663622	-	40	0	69	-1
UTGB	GTSSWE200085.02	exon	2	TRUE	Y65B4A.8.1	chrI	663597	-	109	1.438	44	-1
UTGB	GTSSWE200086.01	exon	1	TRUE	Y65B4A.9	chrI	666887	-	14	0	77	-1
UTGB	GTSSWE200087.01	outron	1	FALSE	Y18H1A.4.1	chrI	695029	-	12	0	395	375
UTGB	GTSSWE200087.02	outron	2	TRUE	Y18H1A.4.1	chrI	694948	-	27	0.6746	314	294
UTGB	GTSSWE200087.03	outron	3	FALSE	Y18H1A.4.1	chrI	694932	-	12	0	298	278
UTGB	GTSSWE200088.01	outron	1	FALSE	Y18H1A.2	chrI	700635	-	12	0	2357	2309
UTGB	GTSSWE200088.02	outron	2	FALSE	Y18H1A.2	chrI	700596	-	63	6.851	2318	2270
UTGB	GTSSWE200088.03	outron	3	FALSE	Y18H1A.2	chrI	700570	-	60	1.429	2292	2244
UTGB	GTSSWE200088.04	outron	4	FALSE	Y18H1A.2	chrI	700564	-	36	0	2286	2238
UTGB	GTSSWE200088.05	outron	5	TRUE	Y18H1A.2	chrI	700558	-	109	0	2280	2232
UTGB	GTSSWE200088.06	outron	6	FALSE	Y18H1A.2	chrI	700540	-	25	4.282	2262	2214
UTGB	GTSSWE200088.07	outron	7	FALSE	Y18H1A.2	chrI	700483	-	36	7.812	2205	2157
UTGB	GTSSWE200088.08	outron	8	FALSE	Y18H1A.2	chrI	700447	-	82	8.156	2169	2121
UTGB	GTSSWE200088.09	outron	9	FALSE	Y18H1A.2	chrI	700090	-	13	0	1812	1764
UTGB	GTSSWE200088.10	outron	10	FALSE	Y18H1A.2	chrI	700057	-	26	0	1779	1731
UTGB	GTSSWE200088.11	exon	11	FALSE	Y18H1A.2	chrI	698314	-	11	0	36	-1
UTGB	GTSSWE200088.12	exon	12	FALSE	Y18H1A.2	chrI	698297	-	31	0	19	-1
UTGB	GTSSWE200089.01	outron	1	FALSE	Y18H1A.3	chrI	718103	-	13	0	2249	2225
UTGB	GTSSWE200089.02	outron	2	FALSE	Y18H1A.3	chrI	718024	-	27	0	2170	2146
UTGB	GTSSWE200089.03	outron	3	FALSE	Y18H1A.3	chrI	717728	-	29	0	1874	1850
UTGB	GTSSWE200089.04	outron	4	FALSE	Y18H1A.3	chrI	716743	-	61	2.168	889	865
UTGB	GTSSWE200089.05	outron	5	FALSE	Y18H1A.3	chrI	716734	-	39	2.428	880	856
UTGB	GTSSWE200089.06	outron	6	TRUE	Y18H1A.3	chrI	716724	-	345	0.3858	870	846
UTGB	GTSSWE200089.07	outron	7	FALSE	Y18H1A.3	chrI	716720	-	88	1.473	866	842
UTGB	GTSSWE200089.08	outron	8	FALSE	Y18H1A.3	chrI	716690	-	41	8.068	836	812
UTGB	GTSSWE200089.09	outron	9	FALSE	Y18H1A.3	chrI	716681	-	19	0	827	803
UTGB	GTSSWE200089.10	outron	10	FALSE	Y18H1A.3	chrI	716629	-	27	0	775	751
UTGB	GTSSWE200089.11	outron	11	FALSE	Y18H1A.3	chrI	716495	-	30	0	641	617
UTGB	GTSSWE200090.01	exon	1	FALSE	Y18H1A.7	chrI	720359	-	26	0	671	-1
UTGB	GTSSWE200090.02	exon	2	FALSE	Y18H1A.7	chrI	720324	-	15	0	636	-1
UTGB	GTSSWE200090.03	exon	3	FALSE	Y18H1A.7	chrI	719855	-	19	0	167	-1
UTGB	GTSSWE200090.04	exon	4	FALSE	Y18H1A.7	chrI	719769	-	42	0	81	-1
UTGB	GTSSWE200090.05	exon	5	TRUE	Y18H1A.7	chrI	719730	-	49	1.157	42	-1
UTGB	GTSSWE200091.01	outron	1	FALSE	Y18H1A.6	chrI	717984	+	14	0	2097	2088
UTGB	GTSSWE200091.02	outron	2	FALSE	Y18H1A.6	chrI	719200	+	26	0	881	872
UTGB	GTSSWE200091.03	outron	3	FALSE	Y18H1A.6	chrI	719962	+	21	0	119	110
UTGB	GTSSWE200091.04	outron	4	FALSE	Y18H1A.6	chrI	719980	+	39	0	101	92
UTGB	GTSSWE200091.05	outron	5	FALSE	Y18H1A.6	chrI	719996	+	38	3.129	85	76
UTGB	GTSSWE200091.06	outron	6	FALSE	Y18H1A.6	chrI	720002	+	25	2.361	79	70
UTGB	GTSSWE200091.07	outron	7	FALSE	Y18H1A.6	chrI	720006	+	24	1.806	75	66
UTGB	GTSSWE200091.08	outron	8	FALSE	Y18H1A.6	chrI	720013	+	74	0.7442	68	59
UTGB	GTSSWE200091.09	outron	9	FALSE	Y18H1A.6	chrI	720020	+	63	0.5491	61	52
UTGB	GTSSWE200091.10	outron	10	FALSE	Y18H1A.6	chrI	720027	+	46	0	54	45
UTGB	GTSSWE200091.11	outron	11	TRUE	Y18H1A.6	chrI	720034	+	1519	0.8092	47	38
UTGB	GTSSWE200091.12	outron	12	FALSE	Y18H1A.6	chrI	720040	+	389	1.606	41	32
UTGB	GTSSWE200091.13	outron	13	FALSE	Y18H1A.6	chrI	720053	+	102	4.36	28	19
UTGB	GTSSWE200092.01	exon	1	TRUE	Y18H1A.15	chrI	737244	-	14	0	690	-1
UTGB	GTSSWE200093.01	exon	1	TRUE	Y18H1A.13	chrI	748445	-	22	0	2988	-1
UTGB	GTSSWE200093.02	exon	2	FALSE	Y18H1A.13	chrI	747650	-	10	0	2193	-1
UTGB	GTSSWE200094.01	exon	1	FALSE	Y18H1A.9	chrI	757044	-	20	0	116	-1
UTGB	GTSSWE200094.02	exon	2	FALSE	Y18H1A.9	chrI	757012	-	23	1.872	84	-1
UTGB	GTSSWE200094.03	exon	3	FALSE	Y18H1A.9	chrI	757009	-	11	9.162	81	-1
UTGB	GTSSWE200094.04	exon	4	FALSE	Y18H1A.9	chrI	756980	-	61	0.5258	52	-1
UTGB	GTSSWE200094.05	exon	5	TRUE	Y18H1A.9	chrI	756977	-	115	0.7622	49	-1
UTGB	GTSSWE200094.06	exon	6	FALSE	Y18H1A.9	chrI	756965	-	25	0	37	-1
UTGB	GTSSWE200094.07	exon	7	FALSE	Y18H1A.9	chrI	756962	-	18	0	34	-1
UTGB	GTSSWE200094.08	exon	8	FALSE	Y18H1A.9	chrI	756953	-	11	3.157	25	-1
UTGB	GTSSWE200094.09	exon	9	FALSE	Y18H1A.9	chrI	756948	-	18	0	20	-1
UTGB	GTSSWE200095.01	outron	1	FALSE	T06A4.2	chrI	763326	-	19	0	1487	1101
UTGB	GTSSWE200095.02	exon	2	TRUE	T06A4.2	chrI	762058	-	35	0	219	-1
UTGB	GTSSWE200096.01	exon	1	TRUE	T06A4.3a	chrI	763469	+	14	0	208	-1
UTGB	GTSSWE200096.02	exon	2	FALSE	T06A4.3a	chrI	763623	+	12	0	54	-1
UTGB	GTSSWE200096.03	exon	3	FALSE	T06A4.3a	chrI	763652	+	10	0	25	-1
UTGB	GTSSWE200097.01	exon	1	FALSE	T06A4.1b	chrI	770894	+	10	0	75	-1
UTGB	GTSSWE200097.02	exon	2	FALSE	T06A4.1b	chrI	770906	+	32	0	63	-1
UTGB	GTSSWE200097.03	exon	3	FALSE	T06A4.1b	chrI	770922	+	14	0	47	-1
UTGB	GTSSWE200097.04	exon	4	TRUE	T06A4.1b	chrI	770943	+	63	0	26	-1
UTGB	GTSSWE200097.05	exon	5	FALSE	T06A4.1b	chrI	770947	+	21	6.402	22	-1
UTGB	GTSSWE200098.01	outron	1	FALSE	ZC123.3	chrI	801275	+	14	0	2129	2095
UTGB	GTSSWE200098.02	outron	2	FALSE	ZC123.3	chrI	802401	+	13	0	1003	969
UTGB	GTSSWE200098.03	outron	3	TRUE	ZC123.3	chrI	802425	+	15	0	979	945
UTGB	GTSSWE200098.04	outron	4	FALSE	ZC123.3	chrI	802840	+	12	0	564	530
UTGB	GTSSWE200099.01	outron	1	FALSE	ZC123.1	chrI	835122	+	16	2.333	2982	2876
UTGB	GTSSWE200099.02	outron	2	FALSE	ZC123.1	chrI	836287	+	195	0.417	1817	1711
UTGB	GTSSWE200099.03	outron	3	FALSE	ZC123.1	chrI	836289	+	11	0	1815	1709
UTGB	GTSSWE200099.04	outron	4	TRUE	ZC123.1	chrI	836292	+	213	0.5008	1812	1706
UTGB	GTSSWE200099.05	outron	5	FALSE	ZC123.1	chrI	836300	+	31	0.6358	1804	1698
UTGB	GTSSWE200099.06	outron	6	FALSE	ZC123.1	chrI	836886	+	16	0	1218	1112
UTGB	GTSSWE200100.01	outron	1	FALSE	ZC123.4c	chrI	847027	-	33	0	2725	261
UTGB	GTSSWE200100.02	outron	2	FALSE	ZC123.4c	chrI	846980	-	13	0	2678	214
UTGB	GTSSWE200100.03	outron	3	FALSE	ZC123.4c	chrI	846975	-	24	0	2673	209
UTGB	GTSSWE200100.04	exon	4	TRUE	ZC123.4c	chrI	845175	-	49	0	873	-1
UTGB	GTSSWE200100.05	exon	5	FALSE	ZC123.4c	chrI	845098	-	10	0	796	-1
UTGB	GTSSWE200101.01	outron	1	FALSE	Y95B8A.8	chrI	852506	+	16	0	955	949
UTGB	GTSSWE200101.02	outron	2	FALSE	Y95B8A.8	chrI	852528	+	14	0	933	927
UTGB	GTSSWE200101.03	outron	3	FALSE	Y95B8A.8	chrI	853340	+	24	4.442	121	115
UTGB	GTSSWE200101.04	outron	4	FALSE	Y95B8A.8	chrI	853349	+	21	0	112	106
UTGB	GTSSWE200101.05	outron	5	FALSE	Y95B8A.8	chrI	853358	+	51	3.183	103	97
UTGB	GTSSWE200101.06	outron	6	FALSE	Y95B8A.8	chrI	853366	+	96	1.443	95	89
UTGB	GTSSWE200101.07	outron	7	FALSE	Y95B8A.8	chrI	853368	+	65	2.2	93	87
UTGB	GTSSWE200101.08	outron	8	FALSE	Y95B8A.8	chrI	853379	+	13	0	82	76
UTGB	GTSSWE200101.09	outron	9	FALSE	Y95B8A.8	chrI	853383	+	112	0.6318	78	72
UTGB	GTSSWE200101.10	outron	10	FALSE	Y95B8A.8	chrI	853385	+	44	0	76	70
UTGB	GTSSWE200101.11	outron	11	FALSE	Y95B8A.8	chrI	853388	+	12	0	73	67
UTGB	GTSSWE200101.12	outron	12	TRUE	Y95B8A.8	chrI	853393	+	248	0.9004	68	62
UTGB	GTSSWE200101.13	outron	13	FALSE	Y95B8A.8	chrI	853400	+	17	4.287	61	55
UTGB	GTSSWE200101.14	outron	14	FALSE	Y95B8A.8	chrI	853414	+	17	0	47	41
UTGB	GTSSWE200102.01	exon	1	FALSE	Y95B8A.7	chrI	855931	+	10	0	2638	-1
UTGB	GTSSWE200102.02	exon	2	TRUE	Y95B8A.7	chrI	856645	+	17	0	1924	-1
UTGB	GTSSWE200103.01	outron	1	TRUE	Y95B8A.6a.2	chrI	885148	+	14	0	1461	1361
UTGB	GTSSWE200103.02	outron	2	FALSE	Y95B8A.6a.2	chrI	886410	+	12	0	199	99
UTGB	GTSSWE200104.01	exon	1	FALSE	Y95B8A.4	chrI	907297	+	14	4.32	198	-1
UTGB	GTSSWE200104.02	exon	2	TRUE	Y95B8A.4	chrI	907304	+	17	1.278	191	-1
UTGB	GTSSWE200104.03	exon	3	FALSE	Y95B8A.4	chrI	907312	+	10	0	183	-1
UTGB	GTSSWE200105.01	outron	1	TRUE	Y95B8A.2	chrI	938490	+	12	0	137	20
UTGB	GTSSWE200106.01	exon	1	TRUE	Y95B8A.1	chrI	941501	+	11	0	913	-1
UTGB	GTSSWE200107.01	outron	1	FALSE	Y34D9B.1a	chrI	957547	-	50	6.538	225	196
UTGB	GTSSWE200107.02	outron	2	FALSE	Y34D9B.1a	chrI	957393	-	55	7.481	71	42
UTGB	GTSSWE200107.03	outron	3	FALSE	Y34D9B.1a	chrI	957387	-	728	0.6945	65	36
UTGB	GTSSWE200107.04	outron	4	FALSE	Y34D9B.1a	chrI	957384	-	349	0.4388	62	33
UTGB	GTSSWE200107.05	outron	5	FALSE	Y34D9B.1a	chrI	957383	-	15	1.349	61	32
UTGB	GTSSWE200107.06	outron	6	FALSE	Y34D9B.1a	chrI	957380	-	149	1.467	58	29
UTGB	GTSSWE200107.07	outron	7	TRUE	Y34D9B.1a	chrI	957375	-	1013	0.3976	53	24
UTGB	GTSSWE200107.08	outron	8	FALSE	Y34D9B.1a	chrI	957372	-	37	0.6664	50	21
UTGB	GTSSWE200107.09	outron	9	FALSE	Y34D9B.1a	chrI	957369	-	208	0.5847	47	18
UTGB	GTSSWE200107.10	outron	10	FALSE	Y34D9B.1a	chrI	957367	-	60	0.8865	45	16
UTGB	GTSSWE200107.11	exon	11	FALSE	Y34D9B.1a	chrI	957331	-	371	2.814	9	-1
UTGB	GTSSWE200108.01	exon	1	FALSE	F54A5.2	chrI	969544	-	16	0	209	-1
UTGB	GTSSWE200108.02	exon	2	FALSE	F54A5.2	chrI	969540	-	17	0	205	-1
UTGB	GTSSWE200108.03	exon	3	FALSE	F54A5.2	chrI	969536	-	19	1.668	201	-1
UTGB	GTSSWE200108.04	exon	4	FALSE	F54A5.2	chrI	969512	-	10	0	177	-1
UTGB	GTSSWE200108.05	exon	5	FALSE	F54A5.2	chrI	969499	-	10	0	164	-1
UTGB	GTSSWE200108.06	exon	6	FALSE	F54A5.2	chrI	969477	-	13	0	142	-1
UTGB	GTSSWE200108.07	exon	7	FALSE	F54A5.2	chrI	969460	-	14	0	125	-1
UTGB	GTSSWE200108.08	exon	8	FALSE	F54A5.2	chrI	969456	-	107	1.401	121	-1
UTGB	GTSSWE200108.09	exon	9	TRUE	F54A5.2	chrI	969408	-	270	8.327	73	-1
UTGB	GTSSWE200108.10	exon	10	FALSE	F54A5.2	chrI	969385	-	103	0.4529	50	-1
UTGB	GTSSWE200108.11	exon	11	FALSE	F54A5.2	chrI	969379	-	63	2.166	44	-1
UTGB	GTSSWE200108.12	exon	12	FALSE	F54A5.2	chrI	969370	-	10	0	35	-1
UTGB	GTSSWE200108.13	exon	13	FALSE	F54A5.2	chrI	969367	-	161	0.5181	32	-1
UTGB	GTSSWE200108.14	exon	14	FALSE	F54A5.2	chrI	969358	-	25	0	23	-1
UTGB	GTSSWE200108.15	exon	15	FALSE	F54A5.2	chrI	969341	-	32	1.997	6	-1
UTGB	GTSSWE200108.16	exon	16	FALSE	F54A5.2	chrI	969336	-	35	0	1	-1
UTGB	GTSSWE200109.01	exon	1	FALSE	F54A5.3a	chrI	973151	-	49	0	96	-1
UTGB	GTSSWE200109.02	exon	2	TRUE	F54A5.3a	chrI	973137	-	149	2.221	82	-1
UTGB	GTSSWE200109.03	exon	3	FALSE	F54A5.3a	chrI	973132	-	11	3.157	77	-1
UTGB	GTSSWE200109.04	exon	4	FALSE	F54A5.3a	chrI	973129	-	32	0	74	-1
UTGB	GTSSWE200109.05	exon	5	FALSE	F54A5.3a	chrI	973123	-	37	3.077	68	-1
UTGB	GTSSWE200110.01	outron	1	FALSE	F54A5.1	chrI	988361	+	24	2.637	1324	1312
UTGB	GTSSWE200110.02	outron	2	FALSE	F54A5.1	chrI	988595	+	11	0	1090	1078
UTGB	GTSSWE200110.03	outron	3	FALSE	F54A5.1	chrI	988689	+	12	0	996	984
UTGB	GTSSWE200110.04	outron	4	FALSE	F54A5.1	chrI	988770	+	29	2.253	915	903
UTGB	GTSSWE200110.05	outron	5	FALSE	F54A5.1	chrI	988806	+	12	0	879	867
UTGB	GTSSWE200110.06	outron	6	FALSE	F54A5.1	chrI	989147	+	18	0	538	526
UTGB	GTSSWE200110.07	outron	7	TRUE	F54A5.1	chrI	989177	+	179	1.834	508	496
UTGB	GTSSWE200110.08	outron	8	FALSE	F54A5.1	chrI	989231	+	15	0	454	442
UTGB	GTSSWE200111.01	exon	1	TRUE	C54G6.2	chrI	1001081	+	25	0	2810	-1
UTGB	GTSSWE200111.02	exon	2	FALSE	C54G6.2	chrI	1002422	+	25	0	1469	-1
UTGB	GTSSWE200111.03	exon	3	FALSE	C54G6.2	chrI	1003653	+	23	0	238	-1
UTGB	GTSSWE200112.01	exon	1	FALSE	C54G6.1a	chrI	1014383	-	43	1.461	73	-1
UTGB	GTSSWE200112.02	exon	2	FALSE	C54G6.1a	chrI	1014378	-	51	0.5369	68	-1
UTGB	GTSSWE200112.03	exon	3	FALSE	C54G6.1a	chrI	1014373	-	11	0	63	-1
UTGB	GTSSWE200112.04	exon	4	TRUE	C54G6.1a	chrI	1014359	-	195	3.568	49	-1
UTGB	GTSSWE200113.01	outron	1	TRUE	C54G6.5	chrI	1014557	+	22	0	1855	1850
UTGB	GTSSWE200114.01	outron	1	TRUE	Y34D9A.11	chrI	1018085	+	27	0	760	752
UTGB	GTSSWE200115.01	outron	1	TRUE	Y34D9A.1	chrI	1030816	-	23	0.5724	905	903
UTGB	GTSSWE200115.02	outron	2	FALSE	Y34D9A.1	chrI	1030776	-	12	0	865	863
UTGB	GTSSWE200115.03	outron	3	FALSE	Y34D9A.1	chrI	1030112	-	18	2.91	201	199
UTGB	GTSSWE200115.04	outron	4	FALSE	Y34D9A.1	chrI	1029924	-	18	0	13	11
UTGB	GTSSWE200116.01	outron	1	FALSE	Y34D9A.4	chrI	1034667	-	20	0	1229	1228
UTGB	GTSSWE200116.02	outron	2	FALSE	Y34D9A.4	chrI	1034356	-	30	0	918	917
UTGB	GTSSWE200116.03	outron	3	FALSE	Y34D9A.4	chrI	1034336	-	18	0.6746	898	897
UTGB	GTSSWE200116.04	outron	4	TRUE	Y34D9A.4	chrI	1034334	-	55	0.703	896	895
UTGB	GTSSWE200116.05	outron	5	FALSE	Y34D9A.4	chrI	1034316	-	26	1.954	878	877
UTGB	GTSSWE200116.06	outron	6	FALSE	Y34D9A.4	chrI	1034309	-	51	1.97	871	870
UTGB	GTSSWE200116.07	outron	7	FALSE	Y34D9A.4	chrI	1034289	-	11	14.76	851	850
UTGB	GTSSWE200116.08	outron	8	FALSE	Y34D9A.4	chrI	1034122	-	24	0	684	683
UTGB	GTSSWE200116.09	outron	9	FALSE	Y34D9A.4	chrI	1034115	-	14	0	677	676
UTGB	GTSSWE200116.10	outron	10	FALSE	Y34D9A.4	chrI	1033862	-	13	0	424	423
UTGB	GTSSWE200116.11	outron	11	FALSE	Y34D9A.4	chrI	1033626	-	18	0	188	187
UTGB	GTSSWE200116.12	outron	12	FALSE	Y34D9A.4	chrI	1033614	-	13	0	176	175
UTGB	GTSSWE200117.01	outron	1	FALSE	Y34D9A.3	chrI	1034429	+	12	0	46	40
UTGB	GTSSWE200117.02	outron	2	FALSE	Y34D9A.3	chrI	1034443	+	13	3.595	32	26
UTGB	GTSSWE200117.03	outron	3	TRUE	Y34D9A.3	chrI	1034455	+	26	2.581	20	14
UTGB	GTSSWE200118.01	outron	1	FALSE	Y34D9A.7	chrI	1040893	+	29	1.307	593	583
UTGB	GTSSWE200118.02	outron	2	FALSE	Y34D9A.7	chrI	1040925	+	21	2.361	561	551
UTGB	GTSSWE200118.03	outron	3	FALSE	Y34D9A.7	chrI	1040937	+	18	0	549	539
UTGB	GTSSWE200118.04	outron	4	FALSE	Y34D9A.7	chrI	1040955	+	13	0	531	521
UTGB	GTSSWE200118.05	outron	5	FALSE	Y34D9A.7	chrI	1041020	+	10	0	466	456
UTGB	GTSSWE200118.06	outron	6	TRUE	Y34D9A.7	chrI	1041442	+	39	0	44	34
UTGB	GTSSWE200119.01	outron	1	FALSE	Y34D9A.6	chrI	1048196	+	10	1.497	1409	1402
UTGB	GTSSWE200119.02	outron	2	FALSE	Y34D9A.6	chrI	1048207	+	15	2.955	1398	1391
UTGB	GTSSWE200119.03	outron	3	FALSE	Y34D9A.6	chrI	1048432	+	16	0	1173	1166
UTGB	GTSSWE200119.04	outron	4	FALSE	Y34D9A.6	chrI	1048676	+	14	0	929	922
UTGB	GTSSWE200119.05	outron	5	FALSE	Y34D9A.6	chrI	1048708	+	15	0	897	890
UTGB	GTSSWE200119.06	outron	6	FALSE	Y34D9A.6	chrI	1049054	+	10	0	551	544
UTGB	GTSSWE200119.07	outron	7	FALSE	Y34D9A.6	chrI	1049085	+	13	0	520	513
UTGB	GTSSWE200119.08	outron	8	FALSE	Y34D9A.6	chrI	1049112	+	12	0	493	486
UTGB	GTSSWE200119.09	outron	9	TRUE	Y34D9A.6	chrI	1049135	+	52	3.05	470	463
UTGB	GTSSWE200119.10	outron	10	FALSE	Y34D9A.6	chrI	1049176	+	21	6.521	429	422
UTGB	GTSSWE200119.11	outron	11	FALSE	Y34D9A.6	chrI	1049189	+	22	0	416	409
UTGB	GTSSWE200119.12	outron	12	FALSE	Y34D9A.6	chrI	1049200	+	23	3.892	405	398
UTGB	GTSSWE200119.13	outron	13	FALSE	Y34D9A.6	chrI	1049208	+	28	5.148	397	390
UTGB	GTSSWE200119.14	outron	14	FALSE	Y34D9A.6	chrI	1049218	+	12	2.221	387	380
UTGB	GTSSWE200119.15	outron	15	FALSE	Y34D9A.6	chrI	1049230	+	21	0	375	368
UTGB	GTSSWE200119.16	outron	16	FALSE	Y34D9A.6	chrI	1049413	+	10	0	192	185
UTGB	GTSSWE200119.17	outron	17	FALSE	Y34D9A.6	chrI	1049520	+	32	0.714	85	78
UTGB	GTSSWE200119.18	outron	18	FALSE	Y34D9A.6	chrI	1049537	+	33	2.331	68	61
UTGB	GTSSWE200119.19	outron	19	FALSE	Y34D9A.6	chrI	1049565	+	11	0	40	33
UTGB	GTSSWE200120.01	exon	1	FALSE	Y34D9A.8b	chrI	1054350	-	39	5.927	702	-1
UTGB	GTSSWE200120.02	exon	2	FALSE	Y34D9A.8b	chrI	1054337	-	140	1.298	689	-1
UTGB	GTSSWE200120.03	exon	3	FALSE	Y34D9A.8b	chrI	1054333	-	27	0	685	-1
UTGB	GTSSWE200120.04	exon	4	FALSE	Y34D9A.8b	chrI	1054329	-	58	0.8843	681	-1
UTGB	GTSSWE200120.05	exon	5	FALSE	Y34D9A.8b	chrI	1054323	-	52	2.968	675	-1
UTGB	GTSSWE200120.06	exon	6	FALSE	Y34D9A.8b	chrI	1054203	-	14	0	555	-1
UTGB	GTSSWE200120.07	exon	7	FALSE	Y34D9A.8b	chrI	1054196	-	18	2.183	548	-1
UTGB	GTSSWE200120.08	exon	8	FALSE	Y34D9A.8b	chrI	1054181	-	31	1.517	533	-1
UTGB	GTSSWE200120.09	exon	9	FALSE	Y34D9A.8b	chrI	1054151	-	22	0.6608	503	-1
UTGB	GTSSWE200120.10	exon	10	FALSE	Y34D9A.8b	chrI	1054148	-	23	2.163	500	-1
UTGB	GTSSWE200120.11	exon	11	FALSE	Y34D9A.8b	chrI	1054142	-	17	0	494	-1
UTGB	GTSSWE200120.12	exon	12	FALSE	Y34D9A.8b	chrI	1054136	-	15	1.349	488	-1
UTGB	GTSSWE200120.13	exon	13	FALSE	Y34D9A.8b	chrI	1054061	-	18	0	413	-1
UTGB	GTSSWE200120.14	exon	14	FALSE	Y34D9A.8b	chrI	1054012	-	10	0	364	-1
UTGB	GTSSWE200120.15	exon	15	FALSE	Y34D9A.8b	chrI	1053984	-	24	1.802	336	-1
UTGB	GTSSWE200120.16	exon	16	TRUE	Y34D9A.8b	chrI	1053735	-	204	0.4786	87	-1
UTGB	GTSSWE200120.17	exon	17	FALSE	Y34D9A.8b	chrI	1053730	-	22	6.733	82	-1
UTGB	GTSSWE200120.18	exon	18	FALSE	Y34D9A.8b	chrI	1053706	-	13	0	58	-1
UTGB	GTSSWE200120.19	exon	19	FALSE	Y34D9A.8b	chrI	1053702	-	107	0.5296	54	-1
UTGB	GTSSWE200120.20	exon	20	FALSE	Y34D9A.8b	chrI	1053699	-	153	0.5426	51	-1
UTGB	GTSSWE200120.21	exon	21	FALSE	Y34D9A.8b	chrI	1053682	-	37	0.8661	34	-1
UTGB	GTSSWE200120.22	exon	22	FALSE	Y34D9A.8b	chrI	1053677	-	39	1.454	29	-1
UTGB	GTSSWE200121.01	outron	1	FALSE	Y34D9A.10	chrI	1068918	-	26	5.19	2046	2016
UTGB	GTSSWE200121.02	outron	2	FALSE	Y34D9A.10	chrI	1068845	-	16	0	1973	1943
UTGB	GTSSWE200121.03	outron	3	FALSE	Y34D9A.10	chrI	1068564	-	19	0	1692	1662
UTGB	GTSSWE200121.04	outron	4	FALSE	Y34D9A.10	chrI	1068550	-	65	0	1678	1648
UTGB	GTSSWE200121.05	outron	5	FALSE	Y34D9A.10	chrI	1068149	-	13	0	1277	1247
UTGB	GTSSWE200121.06	outron	6	FALSE	Y34D9A.10	chrI	1068090	-	10	0	1218	1188
UTGB	GTSSWE200121.07	outron	7	FALSE	Y34D9A.10	chrI	1067976	-	16	0	1104	1074
UTGB	GTSSWE200121.08	outron	8	FALSE	Y34D9A.10	chrI	1067940	-	18	0	1068	1038
UTGB	GTSSWE200121.09	outron	9	FALSE	Y34D9A.10	chrI	1067740	-	16	0	868	838
UTGB	GTSSWE200121.10	outron	10	FALSE	Y34D9A.10	chrI	1067127	-	10	0	255	225
UTGB	GTSSWE200121.11	outron	11	FALSE	Y34D9A.10	chrI	1067115	-	58	0.5782	243	213
UTGB	GTSSWE200121.12	outron	12	FALSE	Y34D9A.10	chrI	1067104	-	22	1.411	232	202
UTGB	GTSSWE200121.13	outron	13	FALSE	Y34D9A.10	chrI	1067100	-	54	1.078	228	198
UTGB	GTSSWE200121.14	outron	14	FALSE	Y34D9A.10	chrI	1067093	-	41	0	221	191
UTGB	GTSSWE200121.15	outron	15	TRUE	Y34D9A.10	chrI	1067084	-	290	0	212	182
UTGB	GTSSWE200121.16	outron	16	FALSE	Y34D9A.10	chrI	1067077	-	25	1.101	205	175
UTGB	GTSSWE200121.17	outron	17	FALSE	Y34D9A.10	chrI	1067071	-	31	0	199	169
UTGB	GTSSWE200121.18	outron	18	FALSE	Y34D9A.10	chrI	1067045	-	32	0	173	143
UTGB	GTSSWE200121.19	outron	19	FALSE	Y34D9A.10	chrI	1067036	-	20	0	164	134
UTGB	GTSSWE200121.20	outron	20	FALSE	Y34D9A.10	chrI	1067006	-	19	0	134	104
UTGB	GTSSWE200121.21	outron	21	FALSE	Y34D9A.10	chrI	1066927	-	19	0	55	25
UTGB	GTSSWE200122.01	exon	1	FALSE	Y34D9A.2	chrI	1062204	+	11	2.389	245	-1
UTGB	GTSSWE200122.02	exon	2	TRUE	Y34D9A.2	chrI	1062338	+	32	0	111	-1
UTGB	GTSSWE200122.03	exon	3	FALSE	Y34D9A.2	chrI	1062385	+	16	0	64	-1
UTGB	GTSSWE200123.01	exon	1	FALSE	R06A10.2.1	chrI	1066585	+	16	0	2413	-1
UTGB	GTSSWE200123.02	exon	2	FALSE	R06A10.2.1	chrI	1068424	+	18	0	574	-1
UTGB	GTSSWE200123.03	exon	3	FALSE	R06A10.2.1	chrI	1068529	+	15	5.079	469	-1
UTGB	GTSSWE200123.04	exon	4	FALSE	R06A10.2.1	chrI	1068540	+	11	0	458	-1
UTGB	GTSSWE200123.05	exon	5	FALSE	R06A10.2.1	chrI	1068565	+	43	0.9641	433	-1
UTGB	GTSSWE200123.06	exon	6	FALSE	R06A10.2.1	chrI	1068573	+	12	2.267	425	-1
UTGB	GTSSWE200123.07	exon	7	TRUE	R06A10.2.1	chrI	1068582	+	589	1.172	416	-1
UTGB	GTSSWE200123.08	exon	8	FALSE	R06A10.2.1	chrI	1068584	+	18	1.656	414	-1
UTGB	GTSSWE200123.09	exon	9	FALSE	R06A10.2.1	chrI	1068588	+	11	6.314	410	-1
UTGB	GTSSWE200123.10	exon	10	FALSE	R06A10.2.1	chrI	1068601	+	21	0	397	-1
UTGB	GTSSWE200123.11	exon	11	FALSE	R06A10.2.1	chrI	1068608	+	241	0.8285	390	-1
UTGB	GTSSWE200123.12	exon	12	FALSE	R06A10.2.1	chrI	1068621	+	21	2.638	377	-1
UTGB	GTSSWE200123.13	exon	13	FALSE	R06A10.2.1	chrI	1068639	+	295	1.407	359	-1
UTGB	GTSSWE200123.14	exon	14	FALSE	R06A10.2.1	chrI	1068660	+	25	0	338	-1
UTGB	GTSSWE200123.15	exon	15	FALSE	R06A10.2.1	chrI	1068678	+	11	0	320	-1
UTGB	GTSSWE200123.16	exon	16	FALSE	R06A10.2.1	chrI	1068732	+	23	0	266	-1
UTGB	GTSSWE200123.17	exon	17	FALSE	R06A10.2.1	chrI	1068762	+	16	6.634	236	-1
UTGB	GTSSWE200123.18	exon	18	FALSE	R06A10.2.1	chrI	1068803	+	12	0	195	-1
UTGB	GTSSWE200123.19	exon	19	FALSE	R06A10.2.1	chrI	1068818	+	29	0	180	-1
UTGB	GTSSWE200124.01	exon	1	FALSE	R06A10.1	chrI	1083606	+	10	0	2364	-1
UTGB	GTSSWE200124.02	exon	2	FALSE	R06A10.1	chrI	1084209	+	12	0	1761	-1
UTGB	GTSSWE200124.03	exon	3	FALSE	R06A10.1	chrI	1084541	+	10	0.8493	1429	-1
UTGB	GTSSWE200124.04	exon	4	FALSE	R06A10.1	chrI	1084559	+	15	0	1411	-1
UTGB	GTSSWE200124.05	exon	5	TRUE	R06A10.1	chrI	1084579	+	37	0	1391	-1
UTGB	GTSSWE200124.06	exon	6	FALSE	R06A10.1	chrI	1085273	+	12	0	697	-1
UTGB	GTSSWE200124.07	exon	7	FALSE	R06A10.1	chrI	1085945	+	31	1.272	25	-1
UTGB	GTSSWE200125.01	outron	1	TRUE	R06A10.5	chrI	1088606	+	21	0	521	486
UTGB	GTSSWE200125.02	outron	2	FALSE	R06A10.5	chrI	1088948	+	10	0	179	144
UTGB	GTSSWE200126.01	outron	1	FALSE	R06A10.4	chrI	1098634	-	10	0	2838	2835
UTGB	GTSSWE200126.02	outron	2	FALSE	R06A10.4	chrI	1098629	-	18	0	2833	2830
UTGB	GTSSWE200126.03	outron	3	FALSE	R06A10.4	chrI	1098388	-	14	0	2592	2589
UTGB	GTSSWE200126.04	outron	4	FALSE	R06A10.4	chrI	1098189	-	16	0	2393	2390
UTGB	GTSSWE200126.05	outron	5	FALSE	R06A10.4	chrI	1098093	-	17	0	2297	2294
UTGB	GTSSWE200126.06	outron	6	FALSE	R06A10.4	chrI	1097890	-	12	0	2094	2091
UTGB	GTSSWE200126.07	outron	7	TRUE	R06A10.4	chrI	1097266	-	26	0	1470	1467
UTGB	GTSSWE200127.01	exon	1	FALSE	ZK993.1	chrI	1126503	+	12	0	1858	-1
UTGB	GTSSWE200127.02	exon	2	TRUE	ZK993.1	chrI	1128326	+	332	1.162	35	-1
UTGB	GTSSWE200127.03	exon	3	FALSE	ZK993.1	chrI	1128333	+	11	0	28	-1
UTGB	GTSSWE200127.04	exon	4	FALSE	ZK993.1	chrI	1128346	+	144	1.566	15	-1
UTGB	GTSSWE200127.05	exon	5	FALSE	ZK993.1	chrI	1128357	+	17	3.21	4	-1
UTGB	GTSSWE200128.01	outron	1	FALSE	Y48G8AL.9	chrI	1141876	-	15	0	852	842
UTGB	GTSSWE200128.02	outron	2	TRUE	Y48G8AL.9	chrI	1141516	-	27	0	492	482
UTGB	GTSSWE200128.03	outron	3	FALSE	Y48G8AL.9	chrI	1141465	-	15	0	441	431
UTGB	GTSSWE200128.04	outron	4	FALSE	Y48G8AL.9	chrI	1141387	-	10	0	363	353
UTGB	GTSSWE200128.05	outron	5	FALSE	Y48G8AL.9	chrI	1141317	-	11	0	293	283
UTGB	GTSSWE200129.01	outron	1	FALSE	Y48G8AL.10	chrI	1155396	-	10	0	1010	1007
UTGB	GTSSWE200129.02	outron	2	FALSE	Y48G8AL.10	chrI	1155315	-	21	0	929	926
UTGB	GTSSWE200129.03	outron	3	FALSE	Y48G8AL.10	chrI	1155276	-	11	0	890	887
UTGB	GTSSWE200129.04	outron	4	FALSE	Y48G8AL.10	chrI	1155248	-	19	0	862	859
UTGB	GTSSWE200129.05	outron	5	FALSE	Y48G8AL.10	chrI	1155213	-	16	0	827	824
UTGB	GTSSWE200129.06	outron	6	FALSE	Y48G8AL.10	chrI	1155203	-	14	0	817	814
UTGB	GTSSWE200129.07	outron	7	FALSE	Y48G8AL.10	chrI	1155195	-	28	0	809	806
UTGB	GTSSWE200129.08	outron	8	FALSE	Y48G8AL.10	chrI	1154817	-	11	0	431	428
UTGB	GTSSWE200129.09	outron	9	TRUE	Y48G8AL.10	chrI	1154762	-	31	0	376	373
UTGB	GTSSWE200129.10	outron	10	FALSE	Y48G8AL.10	chrI	1154465	-	10	0	79	76
UTGB	GTSSWE200130.01	outron	1	TRUE	Y48G8AL.14	chrI	1156126	-	53	10.14	103	103
UTGB	GTSSWE200130.02	outron	2	FALSE	Y48G8AL.14	chrI	1156040	-	38	0	17	17
UTGB	GTSSWE200131.01	outron	1	TRUE	Y48G8AL.8b	chrI	1153874	+	151	0	2725	2707
UTGB	GTSSWE200131.02	outron	2	FALSE	Y48G8AL.8b	chrI	1154009	+	110	0	2590	2572
UTGB	GTSSWE200131.03	outron	3	FALSE	Y48G8AL.8b	chrI	1154054	+	11	0	2545	2527
UTGB	GTSSWE200131.04	outron	4	FALSE	Y48G8AL.8b	chrI	1155449	+	10	0	1150	1132
UTGB	GTSSWE200131.05	outron	5	FALSE	Y48G8AL.8b	chrI	1156252	+	20	1.237	347	329
UTGB	GTSSWE200131.06	outron	6	FALSE	Y48G8AL.8b	chrI	1156263	+	18	0	336	318
UTGB	GTSSWE200131.07	outron	7	FALSE	Y48G8AL.8b	chrI	1156326	+	13	0	273	255
UTGB	GTSSWE200131.08	outron	8	FALSE	Y48G8AL.8b	chrI	1156361	+	20	0	238	220
UTGB	GTSSWE200131.09	outron	9	FALSE	Y48G8AL.8b	chrI	1156391	+	11	0	208	190
UTGB	GTSSWE200131.10	outron	10	FALSE	Y48G8AL.8b	chrI	1156431	+	15	0	168	150
UTGB	GTSSWE200131.11	outron	11	FALSE	Y48G8AL.8b	chrI	1156436	+	22	0	163	145
UTGB	GTSSWE200131.12	outron	12	FALSE	Y48G8AL.8b	chrI	1156506	+	11	0	93	75
UTGB	GTSSWE200131.13	outron	13	FALSE	Y48G8AL.8b	chrI	1156555	+	25	1.979	44	26
UTGB	GTSSWE200131.14	exon	14	FALSE	Y48G8AL.8b	chrI	1156596	+	13	0	3	-1
UTGB	GTSSWE200132.01	exon	1	FALSE	Y48G8AL.11	chrI	1178201	-	16	0	2445	-1
UTGB	GTSSWE200132.02	exon	2	FALSE	Y48G8AL.11	chrI	1178064	-	22	0	2308	-1
UTGB	GTSSWE200132.03	exon	3	FALSE	Y48G8AL.11	chrI	1177999	-	10	0	2243	-1
UTGB	GTSSWE200132.04	exon	4	FALSE	Y48G8AL.11	chrI	1175850	-	13	0	94	-1
UTGB	GTSSWE200132.05	exon	5	FALSE	Y48G8AL.11	chrI	1175844	-	13	0	88	-1
UTGB	GTSSWE200132.06	exon	6	TRUE	Y48G8AL.11	chrI	1175836	-	293	1.877	80	-1
UTGB	GTSSWE200132.07	exon	7	FALSE	Y48G8AL.11	chrI	1175815	-	182	10.43	59	-1
UTGB	GTSSWE200133.01	outron	1	FALSE	Y48G8AL.6	chrI	1173973	+	26	0	2504	2502
UTGB	GTSSWE200133.02	outron	2	FALSE	Y48G8AL.6	chrI	1175961	+	27	4.158	516	514
UTGB	GTSSWE200133.03	outron	3	FALSE	Y48G8AL.6	chrI	1176082	+	23	0	395	393
UTGB	GTSSWE200133.04	outron	4	TRUE	Y48G8AL.6	chrI	1176115	+	42	0	362	360
UTGB	GTSSWE200133.05	outron	5	FALSE	Y48G8AL.6	chrI	1176276	+	24	0	201	199
UTGB	GTSSWE200133.06	outron	6	FALSE	Y48G8AL.6	chrI	1176303	+	16	0	174	172
UTGB	GTSSWE200133.07	outron	7	FALSE	Y48G8AL.6	chrI	1176333	+	30	0	144	142
UTGB	GTSSWE200133.08	outron	8	FALSE	Y48G8AL.6	chrI	1176356	+	18	0	121	119
UTGB	GTSSWE200133.09	outron	9	FALSE	Y48G8AL.6	chrI	1176369	+	18	0	108	106
UTGB	GTSSWE200133.10	outron	10	FALSE	Y48G8AL.6	chrI	1176417	+	15	0	60	58
UTGB	GTSSWE200134.01	outron	1	FALSE	Y48G8AL.5	chrI	1190446	+	11	3.155	2754	2714
UTGB	GTSSWE200134.02	outron	2	FALSE	Y48G8AL.5	chrI	1190455	+	12	0	2745	2705
UTGB	GTSSWE200134.03	outron	3	FALSE	Y48G8AL.5	chrI	1190499	+	17	0	2701	2661
UTGB	GTSSWE200134.04	outron	4	FALSE	Y48G8AL.5	chrI	1190553	+	18	0.6248	2647	2607
UTGB	GTSSWE200134.05	outron	5	FALSE	Y48G8AL.5	chrI	1190564	+	16	6.387	2636	2596
UTGB	GTSSWE200134.06	outron	6	FALSE	Y48G8AL.5	chrI	1190574	+	16	0	2626	2586
UTGB	GTSSWE200134.07	outron	7	FALSE	Y48G8AL.5	chrI	1190586	+	15	0	2614	2574
UTGB	GTSSWE200134.08	outron	8	FALSE	Y48G8AL.5	chrI	1190599	+	12	0	2601	2561
UTGB	GTSSWE200134.09	outron	9	FALSE	Y48G8AL.5	chrI	1190618	+	18	1.008	2582	2542
UTGB	GTSSWE200134.10	outron	10	TRUE	Y48G8AL.5	chrI	1190649	+	66	6.718	2551	2511
UTGB	GTSSWE200134.11	outron	11	FALSE	Y48G8AL.5	chrI	1190701	+	32	0	2499	2459
UTGB	GTSSWE200134.12	outron	12	FALSE	Y48G8AL.5	chrI	1190706	+	12	0	2494	2454
UTGB	GTSSWE200134.13	outron	13	FALSE	Y48G8AL.5	chrI	1191852	+	16	0	1348	1308
UTGB	GTSSWE200134.14	outron	14	FALSE	Y48G8AL.5	chrI	1191859	+	21	0	1341	1301
UTGB	GTSSWE200134.15	outron	15	FALSE	Y48G8AL.5	chrI	1191903	+	37	0	1297	1257
UTGB	GTSSWE200134.16	outron	16	FALSE	Y48G8AL.5	chrI	1191906	+	41	0.6598	1294	1254
UTGB	GTSSWE200134.17	outron	17	FALSE	Y48G8AL.5	chrI	1191917	+	20	0	1283	1243
UTGB	GTSSWE200135.01	outron	1	FALSE	Y48G8AL.1	chrI	1208594	+	28	2.422	2903	2900
UTGB	GTSSWE200135.02	outron	2	FALSE	Y48G8AL.1	chrI	1208628	+	16	0.9322	2869	2866
UTGB	GTSSWE200135.03	outron	3	FALSE	Y48G8AL.1	chrI	1210869	+	13	0	628	625
UTGB	GTSSWE200135.04	outron	4	FALSE	Y48G8AL.1	chrI	1210879	+	10	0	618	615
UTGB	GTSSWE200135.05	outron	5	FALSE	Y48G8AL.1	chrI	1210916	+	28	1.802	581	578
UTGB	GTSSWE200135.06	outron	6	FALSE	Y48G8AL.1	chrI	1210926	+	35	0	571	568
UTGB	GTSSWE200135.07	outron	7	TRUE	Y48G8AL.1	chrI	1210935	+	99	2.589	562	559
UTGB	GTSSWE200135.08	outron	8	FALSE	Y48G8AL.1	chrI	1210953	+	29	12.87	544	541
UTGB	GTSSWE200135.09	outron	9	FALSE	Y48G8AL.1	chrI	1210987	+	19	2.449	510	507
UTGB	GTSSWE200136.01	outron	1	FALSE	Y48G8AL.13.2	chrI	1229542	-	13	0	2742	2728
UTGB	GTSSWE200136.02	outron	2	FALSE	Y48G8AL.13.2	chrI	1229328	-	66	10.35	2528	2514
UTGB	GTSSWE200136.03	outron	3	FALSE	Y48G8AL.13.2	chrI	1229246	-	14	0	2446	2432
UTGB	GTSSWE200136.04	outron	4	FALSE	Y48G8AL.13.2	chrI	1229138	-	22	0	2338	2324
UTGB	GTSSWE200136.05	outron	5	FALSE	Y48G8AL.13.2	chrI	1228193	-	16	0	1393	1379
UTGB	GTSSWE200136.06	outron	6	FALSE	Y48G8AL.13.2	chrI	1228185	-	15	3.809	1385	1371
UTGB	GTSSWE200136.07	outron	7	FALSE	Y48G8AL.13.2	chrI	1228121	-	15	0	1321	1307
UTGB	GTSSWE200136.08	outron	8	TRUE	Y48G8AL.13.2	chrI	1228059	-	79	2.678	1259	1245
UTGB	GTSSWE200136.09	outron	9	FALSE	Y48G8AL.13.2	chrI	1228017	-	10	0	1217	1203
UTGB	GTSSWE200136.10	outron	10	FALSE	Y48G8AL.13.2	chrI	1227977	-	11	0	1177	1163
UTGB	GTSSWE200136.11	outron	11	FALSE	Y48G8AL.13.2	chrI	1227946	-	14	0	1146	1132
UTGB	GTSSWE200136.12	outron	12	FALSE	Y48G8AL.13.2	chrI	1227684	-	23	0	884	870
UTGB	GTSSWE200136.13	outron	13	FALSE	Y48G8AL.13.2	chrI	1227393	-	24	3.202	593	579
UTGB	GTSSWE200136.14	outron	14	FALSE	Y48G8AL.13.2	chrI	1227303	-	25	0	503	489
UTGB	GTSSWE200137.01	outron	1	TRUE	Y48G8AR.1	chrI	1271046	-	30	0	2890	2889
UTGB	GTSSWE200137.02	outron	2	FALSE	Y48G8AR.1	chrI	1270842	-	13	0	2686	2685
UTGB	GTSSWE200137.03	outron	3	FALSE	Y48G8AR.1	chrI	1270708	-	14	0	2552	2551
UTGB	GTSSWE200137.04	outron	4	FALSE	Y48G8AR.1	chrI	1270182	-	27	0	2026	2025
UTGB	GTSSWE200137.05	outron	5	FALSE	Y48G8AR.1	chrI	1269984	-	14	0	1828	1827
UTGB	GTSSWE200137.06	outron	6	FALSE	Y48G8AR.1	chrI	1269645	-	12	0	1489	1488
UTGB	GTSSWE200137.07	outron	7	FALSE	Y48G8AR.1	chrI	1269389	-	27	0	1233	1232
UTGB	GTSSWE200137.08	outron	8	FALSE	Y48G8AR.1	chrI	1269128	-	15	0	972	971
UTGB	GTSSWE200137.09	outron	9	FALSE	Y48G8AR.1	chrI	1268851	-	15	0	695	694
UTGB	GTSSWE200137.10	outron	10	FALSE	Y48G8AR.1	chrI	1268551	-	17	3.547	395	394
UTGB	GTSSWE200137.11	outron	11	FALSE	Y48G8AR.1	chrI	1268380	-	17	0	224	223
UTGB	GTSSWE200138.01	exon	1	TRUE	Y48G8AR.2	chrI	1280817	+	17	0	1288	-1
UTGB	GTSSWE200139.01	outron	1	FALSE	K12C11.4	chrI	1302910	+	13	0	2666	2653
UTGB	GTSSWE200139.02	outron	2	FALSE	K12C11.4	chrI	1302956	+	12	0	2620	2607
UTGB	GTSSWE200139.03	outron	3	FALSE	K12C11.4	chrI	1304179	+	11	0	1397	1384
UTGB	GTSSWE200139.04	outron	4	FALSE	K12C11.4	chrI	1304420	+	11	0	1156	1143
UTGB	GTSSWE200139.05	outron	5	FALSE	K12C11.4	chrI	1305315	+	14	0.6969	261	248
UTGB	GTSSWE200139.06	outron	6	FALSE	K12C11.4	chrI	1305527	+	10	0	49	36
UTGB	GTSSWE200139.07	outron	7	TRUE	K12C11.4	chrI	1305540	+	33	0	36	23
UTGB	GTSSWE200140.01	outron	1	TRUE	K12C11.3	chrI	1335346	+	64	0	50	47
UTGB	GTSSWE200141.01	outron	1	TRUE	K12C11.6	chrI	1336875	+	27	11.06	146	140
UTGB	GTSSWE200142.01	outron	1	TRUE	K12C11.7	chrI	1338328	+	32	0	480	468
UTGB	GTSSWE200143.01	outron	1	FALSE	K12C11.2.1	chrI	1339854	+	12	0	850	832
UTGB	GTSSWE200143.02	outron	2	FALSE	K12C11.2.1	chrI	1340158	+	27	0	546	528
UTGB	GTSSWE200143.03	outron	3	FALSE	K12C11.2.1	chrI	1340179	+	38	2.784	525	507
UTGB	GTSSWE200143.04	outron	4	FALSE	K12C11.2.1	chrI	1340191	+	15	0	513	495
UTGB	GTSSWE200143.05	outron	5	FALSE	K12C11.2.1	chrI	1340207	+	40	0.9145	497	479
UTGB	GTSSWE200143.06	outron	6	FALSE	K12C11.2.1	chrI	1340210	+	137	0.4608	494	476
UTGB	GTSSWE200143.07	outron	7	TRUE	K12C11.2.1	chrI	1340211	+	273	0.4288	493	475
UTGB	GTSSWE200143.08	outron	8	FALSE	K12C11.2.1	chrI	1340216	+	88	1.281	488	470
UTGB	GTSSWE200143.09	outron	9	FALSE	K12C11.2.1	chrI	1340222	+	28	3.972	482	464
UTGB	GTSSWE200143.10	outron	10	FALSE	K12C11.2.1	chrI	1340234	+	63	1.071	470	452
UTGB	GTSSWE200143.11	outron	11	FALSE	K12C11.2.1	chrI	1340243	+	11	0	461	443
UTGB	GTSSWE200143.12	outron	12	FALSE	K12C11.2.1	chrI	1340256	+	59	1.07	448	430
UTGB	GTSSWE200143.13	outron	13	FALSE	K12C11.2.1	chrI	1340271	+	37	1.26	433	415
UTGB	GTSSWE200143.14	outron	14	FALSE	K12C11.2.1	chrI	1340275	+	42	0.5697	429	411
UTGB	GTSSWE200143.15	outron	15	FALSE	K12C11.2.1	chrI	1340315	+	12	0	389	371
UTGB	GTSSWE200143.16	outron	16	FALSE	K12C11.2.1	chrI	1340327	+	18	0	377	359
UTGB	GTSSWE200143.17	outron	17	FALSE	K12C11.2.1	chrI	1340353	+	60	0	351	333
UTGB	GTSSWE200143.18	outron	18	FALSE	K12C11.2.1	chrI	1340512	+	16	0	192	174
UTGB	GTSSWE200143.19	outron	19	FALSE	K12C11.2.1	chrI	1340526	+	16	0	178	160
UTGB	GTSSWE200143.20	outron	20	FALSE	K12C11.2.1	chrI	1340537	+	27	0	167	149
UTGB	GTSSWE200143.21	outron	21	FALSE	K12C11.2.1	chrI	1340579	+	113	1.583	125	107
UTGB	GTSSWE200143.22	outron	22	FALSE	K12C11.2.1	chrI	1340586	+	132	1.313	118	100
UTGB	GTSSWE200143.23	outron	23	FALSE	K12C11.2.1	chrI	1340592	+	20	0.9145	112	94
UTGB	GTSSWE200144.01	outron	1	FALSE	K12C11.1.1	chrI	1347100	-	22	0	2406	2406
UTGB	GTSSWE200144.02	outron	2	FALSE	K12C11.1.1	chrI	1347015	-	24	0	2321	2321
UTGB	GTSSWE200144.03	outron	3	FALSE	K12C11.1.1	chrI	1346949	-	30	1.672	2255	2255
UTGB	GTSSWE200144.04	outron	4	FALSE	K12C11.1.1	chrI	1346924	-	20	0	2230	2230
UTGB	GTSSWE200144.05	outron	5	FALSE	K12C11.1.1	chrI	1346917	-	21	0	2223	2223
UTGB	GTSSWE200144.06	outron	6	TRUE	K12C11.1.1	chrI	1346904	-	47	0.765	2210	2210
UTGB	GTSSWE200144.07	outron	7	FALSE	K12C11.1.1	chrI	1346874	-	27	0	2180	2180
UTGB	GTSSWE200144.08	outron	8	FALSE	K12C11.1.1	chrI	1346869	-	20	0	2175	2175
UTGB	GTSSWE200144.09	outron	9	FALSE	K12C11.1.1	chrI	1346847	-	13	0	2153	2153
UTGB	GTSSWE200144.10	outron	10	FALSE	K12C11.1.1	chrI	1346513	-	26	0	1819	1819
UTGB	GTSSWE200144.11	outron	11	FALSE	K12C11.1.1	chrI	1346242	-	18	4.03	1548	1548
UTGB	GTSSWE200144.12	outron	12	FALSE	K12C11.1.1	chrI	1346230	-	42	1.09	1536	1536
UTGB	GTSSWE200144.13	outron	13	FALSE	K12C11.1.1	chrI	1346208	-	21	1.89	1514	1514
UTGB	GTSSWE200144.14	outron	14	FALSE	K12C11.1.1	chrI	1345650	-	17	0	956	956
UTGB	GTSSWE200144.15	outron	15	FALSE	K12C11.1.1	chrI	1345358	-	34	0	664	664
UTGB	GTSSWE200145.01	outron	1	FALSE	Y92H12BL.1	chrI	1346032	+	15	0	2587	2474
UTGB	GTSSWE200145.02	outron	2	FALSE	Y92H12BL.1	chrI	1346052	+	18	0	2567	2454
UTGB	GTSSWE200145.03	outron	3	FALSE	Y92H12BL.1	chrI	1346090	+	22	0	2529	2416
UTGB	GTSSWE200145.04	outron	4	TRUE	Y92H12BL.1	chrI	1348453	+	34	0	166	53
UTGB	GTSSWE200145.05	outron	5	FALSE	Y92H12BL.1	chrI	1348458	+	12	0	161	48
UTGB	GTSSWE200145.06	exon	6	FALSE	Y92H12BL.1	chrI	1348588	+	22	0	31	-1
UTGB	GTSSWE200145.07	exon	7	FALSE	Y92H12BL.1	chrI	1348618	+	19	0	1	-1
UTGB	GTSSWE200146.01	outron	1	FALSE	Y92H12BL.5	chrI	1363712	+	12	0	1810	1598
UTGB	GTSSWE200146.02	outron	2	FALSE	Y92H12BL.5	chrI	1363800	+	15	0	1722	1510
UTGB	GTSSWE200146.03	outron	3	FALSE	Y92H12BL.5	chrI	1364188	+	16	0	1334	1122
UTGB	GTSSWE200146.04	outron	4	FALSE	Y92H12BL.5	chrI	1365231	+	11	0	291	79
UTGB	GTSSWE200146.05	exon	5	TRUE	Y92H12BL.5	chrI	1365360	+	31	0	162	-1
UTGB	GTSSWE200146.06	exon	6	FALSE	Y92H12BL.5	chrI	1365374	+	18	0	148	-1
UTGB	GTSSWE200147.01	outron	1	FALSE	Y92H12BL.4	chrI	1385780	-	15	0	721	709
UTGB	GTSSWE200147.02	outron	2	FALSE	Y92H12BL.4	chrI	1385730	-	28	1.536	671	659
UTGB	GTSSWE200147.03	outron	3	TRUE	Y92H12BL.4	chrI	1385683	-	89	4.401	624	612
UTGB	GTSSWE200147.04	outron	4	FALSE	Y92H12BL.4	chrI	1385600	-	10	0	541	529
UTGB	GTSSWE200147.05	outron	5	FALSE	Y92H12BL.4	chrI	1385578	-	22	0	519	507
UTGB	GTSSWE200147.06	outron	6	FALSE	Y92H12BL.4	chrI	1385557	-	16	3.104	498	486
UTGB	GTSSWE200147.07	outron	7	FALSE	Y92H12BL.4	chrI	1385516	-	10	0	457	445
UTGB	GTSSWE200147.08	outron	8	FALSE	Y92H12BL.4	chrI	1385441	-	16	0	382	370
UTGB	GTSSWE200147.09	outron	9	FALSE	Y92H12BL.4	chrI	1385401	-	18	6.533	342	330
UTGB	GTSSWE200147.10	outron	10	FALSE	Y92H12BL.4	chrI	1385167	-	14	0.6969	108	96
UTGB	GTSSWE200147.11	outron	11	FALSE	Y92H12BL.4	chrI	1385155	-	17	3.541	96	84
UTGB	GTSSWE200147.12	outron	12	FALSE	Y92H12BL.4	chrI	1385150	-	30	0	91	79
UTGB	GTSSWE200147.13	outron	13	FALSE	Y92H12BL.4	chrI	1385147	-	47	0.8675	88	76
UTGB	GTSSWE200148.01	exon	1	TRUE	Y92H12BL.2	chrI	1375848	+	24	0	2982	-1
UTGB	GTSSWE200148.02	exon	2	FALSE	Y92H12BL.2	chrI	1375950	+	17	0	2880	-1
UTGB	GTSSWE200148.03	exon	3	FALSE	Y92H12BL.2	chrI	1376191	+	17	0	2639	-1
UTGB	GTSSWE200148.04	exon	4	FALSE	Y92H12BL.2	chrI	1376350	+	16	0	2480	-1
UTGB	GTSSWE200149.01	outron	1	FALSE	Y92H12BM.1	chrI	1392992	-	25	0	231	206
UTGB	GTSSWE200149.02	outron	2	FALSE	Y92H12BM.1	chrI	1392982	-	12	0	221	196
UTGB	GTSSWE200149.03	outron	3	FALSE	Y92H12BM.1	chrI	1392975	-	12	0	214	189
UTGB	GTSSWE200149.04	outron	4	FALSE	Y92H12BM.1	chrI	1392970	-	17	0	209	184
UTGB	GTSSWE200149.05	outron	5	FALSE	Y92H12BM.1	chrI	1392967	-	20	4.357	206	181
UTGB	GTSSWE200149.06	outron	6	FALSE	Y92H12BM.1	chrI	1392956	-	16	0	195	170
UTGB	GTSSWE200149.07	outron	7	TRUE	Y92H12BM.1	chrI	1392947	-	54	1.217	186	161
UTGB	GTSSWE200149.08	outron	8	FALSE	Y92H12BM.1	chrI	1392940	-	13	0	179	154
UTGB	GTSSWE200149.09	outron	9	FALSE	Y92H12BM.1	chrI	1392829	-	33	0	68	43
UTGB	GTSSWE200150.01	outron	1	FALSE	Y92H12BR.7	chrI	1394231	+	10	0	339	339
UTGB	GTSSWE200150.02	outron	2	TRUE	Y92H12BR.7	chrI	1394310	+	14	0	260	260
UTGB	GTSSWE200150.03	outron	3	FALSE	Y92H12BR.7	chrI	1394485	+	14	0	85	85
UTGB	GTSSWE200151.01	outron	1	FALSE	Y92H12BR.6	chrI	1403486	+	15	0	2459	2450
UTGB	GTSSWE200151.02	outron	2	FALSE	Y92H12BR.6	chrI	1403496	+	17	0	2449	2440
UTGB	GTSSWE200151.03	outron	3	FALSE	Y92H12BR.6	chrI	1403508	+	10	0	2437	2428
UTGB	GTSSWE200151.04	outron	4	TRUE	Y92H12BR.6	chrI	1403579	+	35	0	2366	2357
UTGB	GTSSWE200151.05	outron	5	FALSE	Y92H12BR.6	chrI	1403591	+	13	0	2354	2345
UTGB	GTSSWE200151.06	outron	6	FALSE	Y92H12BR.6	chrI	1404464	+	12	0	1481	1472
UTGB	GTSSWE200151.07	outron	7	FALSE	Y92H12BR.6	chrI	1404524	+	10	0	1421	1412
UTGB	GTSSWE200151.08	outron	8	FALSE	Y92H12BR.6	chrI	1404581	+	11	1.593	1364	1355
UTGB	GTSSWE200151.09	outron	9	FALSE	Y92H12BR.6	chrI	1405146	+	25	0	799	790
UTGB	GTSSWE200152.01	outron	1	TRUE	Y92H12BR.2	chrI	1418523	-	26	0.6865	2728	2714
UTGB	GTSSWE200152.02	outron	2	FALSE	Y92H12BR.2	chrI	1415938	-	10	0	143	129
UTGB	GTSSWE200152.03	outron	3	FALSE	Y92H12BR.2	chrI	1415913	-	10	0	118	104
UTGB	GTSSWE200153.01	outron	1	FALSE	Y92H12BR.3a	chrI	1414003	+	22	0	2589	2586
UTGB	GTSSWE200153.02	outron	2	FALSE	Y92H12BR.3a	chrI	1416225	+	11	0	367	364
UTGB	GTSSWE200153.03	outron	3	FALSE	Y92H12BR.3a	chrI	1416263	+	16	0	329	326
UTGB	GTSSWE200153.04	outron	4	FALSE	Y92H12BR.3a	chrI	1416538	+	12	0	54	51
UTGB	GTSSWE200153.05	outron	5	TRUE	Y92H12BR.3a	chrI	1416554	+	29	0	38	35
UTGB	GTSSWE200154.01	outron	1	FALSE	Y92H12BR.4	chrI	1436178	-	22	0	2481	2459
UTGB	GTSSWE200154.02	outron	2	FALSE	Y92H12BR.4	chrI	1435497	-	33	0	1800	1778
UTGB	GTSSWE200154.03	outron	3	FALSE	Y92H12BR.4	chrI	1435490	-	41	0	1793	1771
UTGB	GTSSWE200154.04	outron	4	FALSE	Y92H12BR.4	chrI	1435430	-	23	0	1733	1711
UTGB	GTSSWE200154.05	outron	5	FALSE	Y92H12BR.4	chrI	1435425	-	17	0	1728	1706
UTGB	GTSSWE200154.06	outron	6	FALSE	Y92H12BR.4	chrI	1435378	-	106	0	1681	1659
UTGB	GTSSWE200154.07	outron	7	FALSE	Y92H12BR.4	chrI	1435348	-	126	0.9694	1651	1629
UTGB	GTSSWE200154.08	outron	8	FALSE	Y92H12BR.4	chrI	1435342	-	28	4.32	1645	1623
UTGB	GTSSWE200154.09	outron	9	FALSE	Y92H12BR.4	chrI	1435325	-	22	4.207	1628	1606
UTGB	GTSSWE200154.10	outron	10	FALSE	Y92H12BR.4	chrI	1435302	-	12	0	1605	1583
UTGB	GTSSWE200154.11	outron	11	FALSE	Y92H12BR.4	chrI	1435251	-	56	4.425	1554	1532
UTGB	GTSSWE200154.12	outron	12	TRUE	Y92H12BR.4	chrI	1435242	-	195	0.9162	1545	1523
UTGB	GTSSWE200154.13	outron	13	FALSE	Y92H12BR.4	chrI	1435238	-	36	0.5766	1541	1519
UTGB	GTSSWE200154.14	outron	14	FALSE	Y92H12BR.4	chrI	1435222	-	121	2.675	1525	1503
UTGB	GTSSWE200154.15	outron	15	FALSE	Y92H12BR.4	chrI	1435091	-	10	0	1394	1372
UTGB	GTSSWE200154.16	outron	16	FALSE	Y92H12BR.4	chrI	1434895	-	18	0	1198	1176
UTGB	GTSSWE200154.17	outron	17	FALSE	Y92H12BR.4	chrI	1434196	-	21	0	499	477
UTGB	GTSSWE200154.18	outron	18	FALSE	Y92H12BR.4	chrI	1433997	-	13	0	300	278
UTGB	GTSSWE200154.19	outron	19	FALSE	Y92H12BR.4	chrI	1433899	-	26	0.5507	202	180
UTGB	GTSSWE200154.20	outron	20	FALSE	Y92H12BR.4	chrI	1433871	-	16	0	174	152
UTGB	GTSSWE200154.21	outron	21	FALSE	Y92H12BR.4	chrI	1433845	-	15	0	148	126
UTGB	GTSSWE200154.22	outron	22	FALSE	Y92H12BR.4	chrI	1433826	-	21	0	129	107
UTGB	GTSSWE200155.01	outron	1	FALSE	Y92H12BR.8	chrI	1435755	+	21	0	538	538
UTGB	GTSSWE200155.02	outron	2	TRUE	Y92H12BR.8	chrI	1435776	+	30	0	517	517
UTGB	GTSSWE200155.03	outron	3	FALSE	Y92H12BR.8	chrI	1435896	+	10	0	397	397
UTGB	GTSSWE200155.04	outron	4	FALSE	Y92H12BR.8	chrI	1436049	+	26	7.498	244	244
UTGB	GTSSWE200155.05	outron	5	FALSE	Y92H12BR.8	chrI	1436075	+	11	2.389	218	218
UTGB	GTSSWE200156.01	outron	1	FALSE	F47G6.4	chrI	1444470	+	10	0	2197	2185
UTGB	GTSSWE200156.02	outron	2	TRUE	F47G6.4	chrI	1445493	+	11	0	1174	1162
UTGB	GTSSWE200157.01	exon	1	TRUE	F47G6.2	chrI	1471232	+	19	0	90	-1
UTGB	GTSSWE200158.01	outron	1	FALSE	F47G6.1	chrI	1481523	+	17	0	1584	1561
UTGB	GTSSWE200158.02	outron	2	FALSE	F47G6.1	chrI	1481823	+	31	0.7258	1284	1261
UTGB	GTSSWE200158.03	outron	3	TRUE	F47G6.1	chrI	1481833	+	144	1.491	1274	1251
UTGB	GTSSWE200158.04	outron	4	FALSE	F47G6.1	chrI	1481923	+	25	0	1184	1161
UTGB	GTSSWE200158.05	outron	5	FALSE	F47G6.1	chrI	1482180	+	24	0	927	904
UTGB	GTSSWE200158.06	outron	6	FALSE	F47G6.1	chrI	1482776	+	16	0	331	308
UTGB	GTSSWE200158.07	outron	7	FALSE	F47G6.1	chrI	1482806	+	17	0	301	278
UTGB	GTSSWE200158.08	exon	8	FALSE	F47G6.1	chrI	1483098	+	12	2.397	9	-1
UTGB	GTSSWE200159.01	outron	1	FALSE	Y92H12A.5	chrI	1514864	-	14	0	453	451
UTGB	GTSSWE200159.02	outron	2	FALSE	Y92H12A.5	chrI	1514859	-	19	1.871	448	446
UTGB	GTSSWE200159.03	outron	3	FALSE	Y92H12A.5	chrI	1514562	-	15	0	151	149
UTGB	GTSSWE200159.04	outron	4	FALSE	Y92H12A.5	chrI	1514556	-	29	4.026	145	143
UTGB	GTSSWE200159.05	outron	5	TRUE	Y92H12A.5	chrI	1514506	-	47	0	95	93
UTGB	GTSSWE200160.01	outron	1	FALSE	Y92H12A.4	chrI	1511897	+	18	0	2866	2861
UTGB	GTSSWE200160.02	outron	2	FALSE	Y92H12A.4	chrI	1514589	+	17	0	174	169
UTGB	GTSSWE200160.03	outron	3	TRUE	Y92H12A.4	chrI	1514628	+	23	0	135	130
UTGB	GTSSWE200160.04	outron	4	FALSE	Y92H12A.4	chrI	1514666	+	12	0	97	92
UTGB	GTSSWE200161.01	exon	1	FALSE	Y92H12A.3	chrI	1529244	+	19	0	687	-1
UTGB	GTSSWE200161.02	exon	2	FALSE	Y92H12A.3	chrI	1529262	+	26	0	669	-1
UTGB	GTSSWE200161.03	exon	3	FALSE	Y92H12A.3	chrI	1529297	+	18	0	634	-1
UTGB	GTSSWE200161.04	exon	4	FALSE	Y92H12A.3	chrI	1529509	+	19	0	422	-1
UTGB	GTSSWE200161.05	exon	5	TRUE	Y92H12A.3	chrI	1529522	+	28	0	409	-1
UTGB	GTSSWE200161.06	exon	6	FALSE	Y92H12A.3	chrI	1529556	+	13	0	375	-1
UTGB	GTSSWE200161.07	exon	7	FALSE	Y92H12A.3	chrI	1529900	+	26	0	31	-1
UTGB	GTSSWE200162.01	outron	1	FALSE	Y92H12A.2	chrI	1540728	+	20	9.553	2906	2798
UTGB	GTSSWE200162.02	outron	2	TRUE	Y92H12A.2	chrI	1540779	+	31	11.94	2855	2747
UTGB	GTSSWE200162.03	outron	3	FALSE	Y92H12A.2	chrI	1542022	+	13	0	1612	1504
UTGB	GTSSWE200162.04	outron	4	FALSE	Y92H12A.2	chrI	1542847	+	15	0	787	679
UTGB	GTSSWE200162.05	outron	5	FALSE	Y92H12A.2	chrI	1543436	+	30	0	198	90
UTGB	GTSSWE200163.01	outron	1	FALSE	Y92H12A.1	chrI	1564625	+	22	0	2985	2977
UTGB	GTSSWE200163.02	outron	2	FALSE	Y92H12A.1	chrI	1564641	+	29	1.506	2969	2961
UTGB	GTSSWE200163.03	outron	3	FALSE	Y92H12A.1	chrI	1565166	+	15	0	2444	2436
UTGB	GTSSWE200163.04	outron	4	FALSE	Y92H12A.1	chrI	1565176	+	13	0	2434	2426
UTGB	GTSSWE200163.05	outron	5	FALSE	Y92H12A.1	chrI	1565210	+	20	1.979	2400	2392
UTGB	GTSSWE200163.06	outron	6	FALSE	Y92H12A.1	chrI	1565223	+	29	1.349	2387	2379
UTGB	GTSSWE200163.07	outron	7	FALSE	Y92H12A.1	chrI	1565228	+	23	3.354	2382	2374
[truncated: 100,748 more rows]

## Sheet: genes with both type of TSSs
URL	ID	Representative TSS type	common gene name	gene name	chr	start position	strand	number of aligned reads in the best-fit Gaussian distribution	standard deviation of the best-fit Gaussian distribution	distance to the start codon	distance to the proximal SL1 site	other gene names (or overlapped genes)
[truncated: 1,128 more rows]

[truncated: 1 more sheets: 154 rep TSSs with short outrons]
