# Supplementary material for: The transcription start site landscape of C. elegans
Source: HighWire-hosted journal article supplement (doi:10.1101/gr.151571.112), 2013-05-01
Supplement: Supplemental_Table_S3.xlsx [file Supplemental_Table_S3.xlsx]

## Sheet: representative TSSs
URL	ID	TSS type	common gene name	gene name	chr	start position	strand	number of aligned reads in the best-fit Gaussian distribution	standard deviation of the best-fit Gaussian distribution	distance to the start codon	distance to the proximal SL1 site	other gene names (or overlapped genes)
UTGB	GTSSWA200001.01	outron	nlp-40	Y74C9A.2.1	chrI	11289	+	11	0.7963	352	329	CE24660 | WBGene00022276 | WP:CE24660 | Y74C9A.2 | Y74C9A.2.1 | Y74C9A.2.2 | Y74C9A.2.3 | Y74C9A.2.4 | Y74C9A.2.5 | Y74C9A.2.6 | nlp-40
UTGB	GTSSWA200002.02	outron	Y48G1C.9	Y48G1C.9.2	chrI	91223	+	59	3.095	186	181	CE38571 | WBGene00021682 | WP:CE38571 | Y48G1C.9 | Y48G1C.9.1 | Y48G1C.9.2
UTGB	GTSSWA200003.01	outron	Y48G1C.1	Y48G1C.1	chrI	93010	+	470	8.435	82	73	CE30019 | WBGene00021676 | WP:CE30019 | Y48G1C.1
UTGB	GTSSWA200004.10	outron	Y48G1C.8	Y48G1C.8	chrI	109000	-	123	0.9814	1240	834	CE42916 | WBGene00021681 | WP:CE42916 | Y48G1C.8
UTGB	GTSSWA200005.03	outron	rab-11.1	F53G12.1	chrI	110310	-	63	1.696	265	252	CE11006 | F53G12.1 | F53G12.1.1 | F53G12.1.2 | WBGene00004274 | WP:CE11006 | rab-11.1
UTGB	GTSSWA200006.04	outron	rpl-7	F53G12.10.2	chrI	110837	+	45	1.407	218	201	CE11024 | F53G12.10 | F53G12.10.1 | F53G12.10.2 | F53G12.10.3 | F53G12.10.4 | F53G12.10.5 | WBGene00004418 | WP:CE11024 | rpl-7
UTGB	GTSSWA200007.04	outron	F56C11.6	F56C11.6a	chrI	171298	+	12	0	2124	2114	CE17905 | CE33402 | F56C11.6 | F56C11.6a | F56C11.6b | WBGene00018958 | WP:CE17905 | WP:CE33402
UTGB	GTSSWA200008.01	outron	F56C11.3	F56C11.3	chrI	182920	-	10	0	148	147	CE17903 | F56C11.3 | WBGene00018955 | WP:CE17903
UTGB	GTSSWA200009.01	outron	F56C11.4	F56C11.4	chrI	183342	+	38	0.993	34	22	CE30543 | F56C11.4 | WBGene00018956 | WP:CE30543
UTGB	GTSSWA200010.02	exon	Y48G1BL.1	Y48G1BL.1	chrI	215969	+	39	0	212	-1	CE27784 | WBGene00021662 | WP:CE27784 | Y48G1BL.1
UTGB	GTSSWA200011.01	exon	Y48G1BM.8	Y48G1BM.8	chrI	252505	-	65	0	924	-1	CE26114 | WBGene00021673 | WP:CE26114 | Y48G1BM.8
UTGB	GTSSWA200012.02	outron	Y48G1BM.1	Y48G1BM.1	chrI	252060	+	26	0	59	54	CE40284 | WBGene00021667 | WP:CE40284 | Y48G1BM.1
UTGB	GTSSWA200013.01	exon	ztf-3	C53D5.4	chrI	289122	-	46	12.89	46	-1	C53D5.4 | CE23611 | WBGene00016905 | WP:CE23611 | ztf-3
UTGB	GTSSWA200014.02	outron	C53D5.1	C53D5.1a	chrI	289232	+	36	1.13	2017	1984	C53D5.1 | C53D5.1a | C53D5.1b | C53D5.1c | C53D5.1c.1 | C53D5.1c.2 | C53D5.1d | CE23609 | CE27883 | CE27884 | CE44411 | WBGene00016902 | WP:CE23609 | WP:CE27883 | WP:CE27884 | WP:CE44411
UTGB	GTSSWA200015.04	outron	C53D5.5	C53D5.5.1	chrI	310888	-	13	5.19	99	84	C53D5.5 | C53D5.5.1 | C53D5.5.2 | CE23612 | WBGene00016906 | WP:CE23612
UTGB	GTSSWA200017.01	outron	Y48G1A.2	Y48G1A.2	chrI	347484	+	15	0	94	27	CE26998 | WBGene00021658 | WP:CE26998 | Y48G1A.2 | Y48G1A.2.1 | Y48G1A.2.2
UTGB	GTSSWA200016.01	exon	mbtr-1	Y48G1A.6a	chrI	348400	-	20	0	32	-1	CE41949 | CE41950 | WBGene00021661 | WP:CE41949 | WP:CE41950 | Y48G1A.6 | Y48G1A.6a | Y48G1A.6b | mbtr-1
UTGB	GTSSWA200018.02	outron	Y48G1A.1	Y48G1A.1	chrI	348493	+	13	0	45	29	CE40283 | WBGene00021657 | WP:CE40283 | Y48G1A.1
UTGB	GTSSWA200019.01	outron	R119.1	R119.1	chrI	365968	-	18	2.356	2063	2057	CE25971 | R119.1 | WBGene00020087 | WP:CE25971
UTGB	GTSSWA200020.01	outron	pqn-59	R119.4	chrI	382469	-	10	0	564	563	CE23925 | R119.4 | R119.4.1 | R119.4.2 | WBGene00004143 | WP:CE23925 | pqn-59 | prp-1
UTGB	GTSSWA200021.02	outron	taf-4	R119.6	chrI	382590	+	283	1.419	246	241	CE39613 | R119.6 | WBGene00006385 | WP:CE39613 | taf-4
UTGB	GTSSWA200022.01	outron	tol-1	C07F11.1	chrI	443658	+	46	4.853	363	344	C07F11.1 | CE28818 | WBGene00006593 | WP:CE28818 | tol-1
UTGB	GTSSWA200023.01	outron	W04C9.2	W04C9.2	chrI	488508	+	15	0	111	102	CE18333 | W04C9.2 | W04C9.2.1 | W04C9.2.2 | WBGene00021024 | WP:CE18333
UTGB	GTSSWA200024.01	exon	haf-4	W04C9.1	chrI	489982	+	54	14.33	72	-1	CE28355 | W04C9.1 | WBGene00001814 | WP:CE28355 | haf-4
UTGB	GTSSWA200025.01	outron	Y65B4BL.4	Y65B4BL.4	chrI	506249	-	20	0.7636	33	26	CE22745 | WBGene00022036 | WP:CE22745 | Y65B4BL.4
UTGB	GTSSWA200026.02	outron	deps-1	Y65B4BL.2	chrI	506443	+	187	2.439	37	31	CE25536 | WBGene00022034 | WP:CE25536 | Y65B4BL.2 | deps-1
UTGB	GTSSWA200027.03	outron	acs-13	Y65B4BL.5	chrI	516601	-	56	6.301	203	141	CE24550 | WBGene00022037 | WP:CE24550 | Y65B4BL.5 | acs-13
UTGB	GTSSWA200028.01	exon	Y65B4BL.6	Y65B4BL.6a	chrI	521394	-	90	0.8594	41	-1	CE41959 | CE41960 | WBGene00022038 | WP:CE41959 | WP:CE41960 | Y65B4BL.6 | Y65B4BL.6a | Y65B4BL.6b
UTGB	GTSSWA200029.02	outron	wwp-1	Y65B4BR.4a	chrI	536946	+	23	8	195	179	CE31384 | CE31385 | CeWWP1 | WBGene00007009 | WP:CE31384 | WP:CE31385 | Y65B4BR.4 | Y65B4BR.4a | Y65B4BR.4b | wwp-1
UTGB	GTSSWA200030.02	exon	lpr-1	Y65B4BR.2	chrI	557451	+	69	0	58	-1	CE29899 | WBGene00002393 | WP:CE29899 | Y65B4BR.2 | let-124 | lpr-1
UTGB	GTSSWA200031.02	exon	grl-16	Y65B4BR.6a	chrI	575115	-	43	2.43	45	-1	CE25541 | CE33240 | WBGene00001725 | WP:CE25541 | WP:CE33240 | Y65B4BR.6 | Y65B4BR.6a | Y65B4BR.6b | grl-16
UTGB	GTSSWA200032.01	outron	sago-2	F56A6.1a	chrI	618163	+	69	0.4365	47	34	CE25906 | CE33401 | F56A6.1 | F56A6.1a | F56A6.1b | WBGene00018921 | WP:CE25906 | WP:CE33401 | sago-2
UTGB	GTSSWA200033.01	exon	vps-20	Y65B4A.3	chrI	636878	+	19	19.12	61	-1	CE22731 | WBGene00022027 | WP:CE22731 | Y65B4A.3 | vps-20
UTGB	GTSSWA200034.01	exon	Y65B4A.7	Y65B4A.7	chrI	647246	-	12	0	17	-1	CE25530 | WBGene00022030 | WP:CE25530 | Y65B4A.7
UTGB	GTSSWA200035.01	outron	Y65B4A.1	Y65B4A.1	chrI	654096	+	21	3.4	35	27	CE27299 | WBGene00022025 | WP:CE27299 | Y65B4A.1
UTGB	GTSSWA200036.01	exon	Y65B4A.8	Y65B4A.8.1	chrI	663597	-	23	0.61	44	-1	CE31383 | WBGene00022031 | WP:CE31383 | Y65B4A.8 | Y65B4A.8.1 | Y65B4A.8.2
UTGB	GTSSWA200037.01	exon	Y65B4A.9	Y65B4A.9	chrI	666887	-	10	0	77	-1	CE22732 | WBGene00022032 | WP:CE22732 | Y65B4A.9
UTGB	GTSSWA200038.01	exon	Y18H1A.7	Y18H1A.7	chrI	719730	-	13	0	42	-1	CE33587 | WBGene00021211 | WP:CE33587 | Y18H1A.7
UTGB	GTSSWA200039.01	outron	pif-1	Y18H1A.6	chrI	720034	+	94	0.9858	47	38	CE30311 | WBGene00004028 | WP:CE30311 | Y18H1A.6 | cePIF1 | pif-1
UTGB	GTSSWA200040.01	exon	col-46	Y18H1A.13	chrI	745518	-	19	2.12	61	-1	CE44999 | WBGene00000623 | WP:CE44999 | Y18H1A.13 | col-46
UTGB	GTSSWA200041.01	exon	T06A4.3	T06A4.3a	chrI	763639	+	11	0	38	-1	CE37044 | CE37045 | T06A4.3 | T06A4.3a | T06A4.3b | WBGene00020283 | WP:CE37044 | WP:CE37045
UTGB	GTSSWA200042.03	outron	Y95B8A.8	Y95B8A.8	chrI	853393	+	37	0.5714	68	62	CE40293 | WBGene00022388 | WP:CE40293 | Y95B8A.8
UTGB	GTSSWA200043.01	exon	Y95B8A.4	Y95B8A.4	chrI	907466	+	25	0	29	-1	CE41603 | WBGene00022385 | WP:CE41603 | Y95B8A.4
UTGB	GTSSWA200044.01	outron	Y95B8A.2	Y95B8A.2	chrI	938496	+	73	15.07	131	14	CE24691 | WBGene00022383 | WP:CE24691 | Y95B8A.2 | Y95B8A.2.1 | Y95B8A.2.2
UTGB	GTSSWA200045.02	outron	mig-1	Y34D9B.1a	chrI	957375	-	76	0.4713	53	24	CE24203 | CE24204 | CNT1 | WBGene00003238 | WP:CE24203 | WP:CE24204 | Y34D9B.1 | Y34D9B.1a | Y34D9B.1b | cfz-1 | frizzled 1 | mig-1
UTGB	GTSSWA200046.01	exon	cutl-20	F54A5.2	chrI	969367	-	12	0	32	-1	CE20860 | F54A5.2 | WBGene00018787 | WP:CE20860 | cutl-20
UTGB	GTSSWA200047.01	exon	shc-1	F54A5.3a	chrI	973135	-	40	12.36	80	-1	CE20862 | CE20863 | CE29391 | CE30804 | F54A5.3 | F54A5.3a | F54A5.3b | F54A5.3c | F54A5.3d | WBGene00018788 | WP:CE20862 | WP:CE20863 | WP:CE29391 | WP:CE30804 | shc-1
UTGB	GTSSWA200048.02	exon	C54G6.1	C54G6.1a	chrI	1014359	-	172	1.507	49	-1	C54G6.1 | C54G6.1a | C54G6.1b | CE17604 | CE27886 | WBGene00016930 | WP:CE17604 | WP:CE27886
UTGB	GTSSWA200049.01	outron	spp-17	C54G6.5	chrI	1015198	+	43	2.455	1214	1209	C54G6.5 | C54G6.5.1 | C54G6.5.2 | CE30269 | WBGene00005002 | WP:CE30269 | spp-17
UTGB	GTSSWA200050.01	outron	spp-23	Y34D9A.11	chrI	1017687	+	104	1.524	1158	1150	CE21539 | WBGene00021335 | WP:CE21539 | Y34D9A.11 | spp-23
UTGB	GTSSWA200051.01	exon	Y34D9A.8	Y34D9A.8b	chrI	1053735	-	10	0	87	-1	CE21525 | CE40314 | WBGene00021333 | WP:CE21525 | WP:CE40314 | Y34D9A.8 | Y34D9A.8a | Y34D9A.8b
UTGB	GTSSWA200052.04	outron	vps-4	Y34D9A.10	chrI	1067084	-	42	1.222	212	182	CE39043 | WBGene00021334 | WP:CE39043 | Y34D9A.10 | Y34D9A.10.1 | Y34D9A.10.2 | phi-25 | vps-4
UTGB	GTSSWA200053.01	exon	gsa-1	R06A10.2.1	chrI	1068582	+	24	1.428	416	-1	CE21115 | R06A10.2 | R06A10.2.1 | R06A10.2.2 | WBGene00001745 | WP:CE21115 | gsa-1
UTGB	GTSSWA200054.01	outron	R06A10.5	R06A10.5	chrI	1088516	+	14	0	611	576	CE40309 | CE45326 | R06A10.5 | R06A10.5a | R06A10.5b | WBGene00044895 | WP:CE40309 | WP:CE45326
UTGB	GTSSWA200055.01	exon	ceh-45	ZK993.1	chrI	1128326	+	10	0	35	-1	CE23489 | WBGene00022837 | WP:CE23489 | ZK993.1 | ceh-45
UTGB	GTSSWA200056.02	outron	aps-3	Y48G8AL.14	chrI	1156126	-	22	1.241	103	103	CE30461 | WBGene00000165 | WP:CE30461 | Y48G8AL.14 | aps-3 | apt-8
UTGB	GTSSWA200057.01	outron	rpl-17	Y48G8AL.8b	chrI	1156291	+	18	0	308	290	CE22195 | CE30023 | WBGene00004429 | WP:CE22195 | WP:CE30023 | Y48G8AL.8 | Y48G8AL.8a | Y48G8AL.8a.1 | Y48G8AL.8a.2 | Y48G8AL.8b | rpl-17
UTGB	GTSSWA200058.01	exon	haf-6	Y48G8AL.11	chrI	1175836	-	82	1.705	80	-1	CE39850 | WBGene00001816 | WP:CE39850 | Y48G8AL.11 | haf-6
UTGB	GTSSWA200059.01	outron	Y48G8AL.5	Y48G8AL.5	chrI	1190620	+	13	2.084	2580	2540	CE30462 | WBGene00021686 | WP:CE30462 | Y48G8AL.5
UTGB	GTSSWA200060.01	exon	Y48G8AL.12	Y48G8AL.12	chrI	1219003	-	152	0.4805	24	-1	CE27271 | WBGene00021690 | WP:CE27271 | Y48G8AL.12
UTGB	GTSSWA200061.01	outron	K12C11.3	K12C11.3	chrI	1335346	+	85	13.09	50	47	CE43991 | CE44139 | K12C11.3 | K12C11.3a | K12C11.3b | WBGene00019674 | WP:CE43991 | WP:CE44139
UTGB	GTSSWA200062.03	outron	K12C11.2.1	K12C11.2.1	chrI	1340275	+	35	0.6834	429	411	CE18056 | K12C11.2 | K12C11.2.1 | K12C11.2.2 | SMT3 | WBGene00004888 | WP:CE18056 | smo-1
UTGB	GTSSWA200063.01	outron	Y92H12BL.4	Y92H12BL.4	chrI	1385146	-	11	0	87	75	CE41342 | WBGene00022365 | WP:CE41342 | Y92H12BL.4
UTGB	GTSSWA200064.01	outron	Y92H12BR.4	Y92H12BR.4	chrI	1435348	-	18	0	1651	1629	CE26784 | WBGene00022370 | WP:CE26784 | Y92H12BR.4
UTGB	GTSSWA200065.02	exon	acs-16	F47G6.2	chrI	1471277	+	47	1.897	45	-1	CE28399 | F47G6.2 | WBGene00018579 | WP:CE28399 | acs-16
UTGB	GTSSWA200066.01	outron	Y92H12A.4	Y92H12A.4	chrI	1511897	+	12	0	2866	2861	CE36766 | WBGene00022360 | WP:CE36766 | Y92H12A.4
UTGB	GTSSWA200067.04	exon	mab-20	Y71G12B.20a	chrI	1651321	-	25	0	64	-1	CE22926 | CE33246 | WBGene00003111 | WP:CE22926 | WP:CE33246 | Y71G12B.20 | Y71G12B.20a | Y71G12B.20b | mab-20
UTGB	GTSSWA200068.01	exon	Y71G12B.18	Y71G12B.18	chrI	1652902	+	21	0	15	-1	CE43962 | WBGene00022156 | WP:CE43962 | Y71G12B.18
UTGB	GTSSWA200069.01	exon	pqn-88	Y71G12B.21	chrI	1656720	-	10	0	18	-1	CE22925 | WBGene00004168 | WP:CE22925 | Y71G12B.21 | pqn-88
UTGB	GTSSWA200070.01	outron	Y71G12B.13	Y71G12B.13	chrI	1701975	+	13	0	149	131	CE40318 | WBGene00022153 | WP:CE40318 | Y71G12B.13
UTGB	GTSSWA200071.01	outron	Y71G12B.11	Y71G12B.11a	chrI	1719379	+	20	0	2219	2214	CE27024 | CE29914 | WBGene00022151 | WP:CE27024 | WP:CE29914 | Y71G12B.11 | Y71G12B.11a | Y71G12B.11b
UTGB	GTSSWA200072.01	exon	Y71G12B.7	Y71G12B.7	chrI	1791344	+	11	0	1112	-1	CE36764 | WBGene00022147 | WP:CE36764 | Y71G12B.7
UTGB	GTSSWA200073.01	exon	pghm-1	Y71G12B.4	chrI	1808094	+	72	0.8484	26	-1	CE26253 | WBGene00022144 | WP:CE26253 | Y71G12B.4 | pghm-1
UTGB	GTSSWA200074.01	exon	Y71G12B.3	Y71G12B.3	chrI	1811679	+	21	5.951	1277	-1	CE43963 | WBGene00022143 | WP:CE43963 | Y71G12B.3
UTGB	GTSSWA200075.01	exon	Y71G12B.2	Y71G12B.2	chrI	1816107	+	21	13.66	44	-1	CE44119 | WBGene00022142 | WP:CE44119 | Y71G12B.2
UTGB	GTSSWA200076.01	exon	Y71G12B.30	Y71G12B.30	chrI	1822945	-	16	0.714	12	-1	CE45003 | WBGene00044347 | WP:CE45003 | Y71G12B.30
UTGB	GTSSWA200077.02	outron	Y71G12B.1	Y71G12B.1b	chrI	1823337	+	64	0	118	111	CE29916 | CE29917 | WBGene00022141 | WP:CE29916 | WP:CE29917 | Y71G12B.1 | Y71G12B.1a | Y71G12B.1b | Y71G12B.1b.1 | Y71G12B.1b.2
UTGB	GTSSWA200078.01	outron	C53H9.2	C53H9.2a	chrI	1832740	+	18	11.76	158	158	C53H9.2 | C53H9.2a | C53H9.2a.1 | C53H9.2a.2 | C53H9.2b | C53H9.2b.1 | C53H9.2b.2 | C53H9.2b.3 | C53H9.2b.4 | C53H9.2c | C53H9.2c.1 | C53H9.2c.2 | C53H9.2c.3 | C53H9.2c.4 | CE08963 | CE33575 | CE39907 | WBGene00016907 | WP:CE08963 | WP:CE33575 | WP:CE39907
UTGB	GTSSWA200079.03	exon	egl-30	M01D7.7a	chrI	1835718	+	42	1.181	219	-1	CE12272 | CE30556 | M01D7.7 | M01D7.7a | M01D7.7b | WBGene00001196 | WP:CE12272 | WP:CE30556 | egl-30 | gqa-1
UTGB	GTSSWA200080.01	outron	emr-1	M01D7.6.3	chrI	1841828	+	29	4.036	633	618	CE12270 | M01D7.6 | M01D7.6.1 | M01D7.6.2 | M01D7.6.3 | WBGene00001309 | WP:CE12270 | emr-1
UTGB	GTSSWA200081.02	exon	nlp-12	M01D7.5	chrI	1843387	+	100	0.9237	21	-1	CE12268 | M01D7.5 | WBGene00003750 | WP:CE12268 | nlp-12
UTGB	GTSSWA200082.01	outron	scm-1	M01D7.2	chrI	1873784	-	11	0	1503	1476	CE25946 | M01D7.2 | WBGene00004743 | WP:CE25946 | scm-1
UTGB	GTSSWA200083.06	exon	tub-2	Y71G12A.3	chrI	1874134	+	107	1.25	44	-1	CE30571 | WBGene00022139 | WP:CE30571 | Y71G12A.3 | tag-305 | tub-2
UTGB	GTSSWA200084.02	outron	Y71G12A.2	Y71G12A.2b	chrI	1895188	+	25	0	48	43	CE44923 | CE45012 | WBGene00022138 | WP:CE44923 | WP:CE45012 | Y71G12A.2 | Y71G12A.2a | Y71G12A.2b
UTGB	GTSSWA200085.01	exon	Y51F10.7	Y51F10.7	chrI	1913936	-	4513	6.531	28	-1	CE30321 | WBGene00021768 | WP:CE30321 | Y51F10.7
UTGB	GTSSWA200086.01	outron	Y51F10.4	Y51F10.4a	chrI	1932286	+	10	3.397	68	67	CE32269 | CE39054 | WBGene00021765 | WP:CE32269 | WP:CE39054 | Y51F10.4 | Y51F10.4a | Y51F10.4b
UTGB	GTSSWA200087.01	outron	Y51F10.10	Y51F10.10	chrI	1958529	-	19	1.043	73	25	CE31380 | WBGene00021771 | WP:CE31380 | Y51F10.10
UTGB	GTSSWA200088.02	exon	Y51F10.2	Y51F10.2	chrI	1978019	+	305	1.747	35	-1	CE30032 | WBGene00021763 | WP:CE30032 | Y51F10.2
UTGB	GTSSWA200089.01	outron	gap-3	Y20F4.3	chrI	2010569	-	10	0	87	71	CE44723 | WBGene00021238 | WP:CE44723 | Y20F4.3 | gap-3
UTGB	GTSSWA200090.01	outron	Y20F4.4	Y20F4.4	chrI	2045073	-	10	0	1290	1265	CE30313 | WBGene00021239 | WP:CE30313 | Y20F4.4
UTGB	GTSSWA200091.01	exon	Y20F4.5	Y20F4.5	chrI	2055947	-	10	0	2243	-1	CE29368 | WBGene00021240 | WP:CE29368 | Y20F4.5
UTGB	GTSSWA200092.02	outron	Y37E3.1	Y37E3.1	chrI	2064000	-	205	7.662	55	36	CE26836 | WBGene00021346 | WP:CE26836 | Y37E3.1
UTGB	GTSSWA200094.03	outron	Y37E3.8	Y37E3.8a.1	chrI	2070829	-	58	0.9725	222	219	CE26774 | CE26904 | WBGene00021350 | WP:CE26774 | WP:CE26904 | Y37E3.8 | Y37E3.8a | Y37E3.8a.1 | Y37E3.8a.2 | Y37E3.8b | Y37E3.8b.1 | Y37E3.8b.2 | Y37E3.8b.3
UTGB	GTSSWA200095.02	outron	Y37E3.11	Y37E3.11a	chrI	2076203	+	26	14.3	2767	2760	CE26830 | CE41945 | WBGene00021352 | WP:CE26830 | WP:CE41945 | Y37E3.11 | Y37E3.11a | Y37E3.11b
UTGB	GTSSWA200096.02	exon	W03F11.1	W03F11.1	chrI	2222314	-	204	0.5412	19	-1	CE14542 | W03F11.1 | WBGene00021005 | WP:CE14542
UTGB	GTSSWA200097.02	exon	dct-9	W03F11.3	chrI	2234912	-	33	1.744	64	-1	CE28502 | W03F11.3 | WBGene00021006 | WP:CE28502 | dct-9
UTGB	GTSSWA200098.01	outron	cdk-7	Y39G10AL.3.2	chrI	2291130	-	15	0	1381	1375	CE30320 | WBGene00000408 | WP:CE30320 | Y39G10AL.3 | Y39G10AL.3.1 | Y39G10AL.3.2 | cdk-7
UTGB	GTSSWA200099.01	outron	tpxl-1	Y39G10AR.12a	chrI	2304413	-	10	3.118	19	18	CE26990 | CE29999 | WBGene00021470 | WP:CE26990 | WP:CE29999 | Y39G10AR.12 | Y39G10AR.12a | Y39G10AR.12b | Y39G10AR.12b.1 | Y39G10AR.12b.2 | tpxl-1
UTGB	GTSSWA200100.01	outron	icp-1	Y39G10AR.13.1	chrI	2306806	-	18	0	18	14	CE26991 | WBGene00002047 | WP:CE26991 | Y39G10AR.13 | Y39G10AR.13.1 | Y39G10AR.13.2 | icp-1
UTGB	GTSSWA200101.01	outron	Y39G10AR.9	Y39G10AR.9	chrI	2306959	+	50	0	452	446	CE28982 | CE45029 | WBGene00021467 | WP:CE28982 | WP:CE45029 | Y39G10AR.9 | Y39G10AR.9a | Y39G10AR.9b
UTGB	GTSSWA200102.01	outron	Y39G10AR.8	Y39G10AR.8	chrI	2313181	+	22	2.812	131	91	CE27254 | WBGene00021466 | WP:CE27254 | Y39G10AR.8 | Y39G10AR.8.1 | Y39G10AR.8.2
UTGB	GTSSWA200103.02	outron	Y39G10AR.7	Y39G10AR.7	chrI	2316181	+	208	0	129	127	CE21764 | WBGene00021465 | WP:CE21764 | Y39G10AR.7
UTGB	GTSSWA200104.01	outron	mcm-4	Y39G10AR.14.1	chrI	2321909	-	16	0	97	90	CE21767 | WBGene00003156 | WP:CE21767 | Y39G10AR.14 | Y39G10AR.14.1 | Y39G10AR.14.2 | mcm-4
UTGB	GTSSWA200105.02	exon	Y39G10AR.16	Y39G10AR.16	chrI	2332629	-	22	1.982	27	-1	CE21755 | WBGene00021472 | WP:CE21755 | Y39G10AR.16
UTGB	GTSSWA200106.02	exon	ugt-31	Y39G10AR.6	chrI	2333327	+	100	0.8672	16	-1	CE33221 | WBGene00021464 | WP:CE33221 | Y39G10AR.6 | ugt-31
UTGB	GTSSWA200107.03	outron	F23C8.5	F23C8.5.1	chrI	2420394	-	167	0.4967	46	39	CE29774 | F23C8.5 | F23C8.5.1 | F23C8.5.2 | WBGene00017734 | WP:CE29774
UTGB	GTSSWA200108.01	outron	F23C8.6	F23C8.6	chrI	2421823	-	49	13.17	124	88	CE20715 | F23C8.6 | WBGene00017735 | WP:CE20715 | phi-24
UTGB	GTSSWA200109.01	outron	F23C8.7	F23C8.7	chrI	2425183	-	11	3.759	108	85	CE20716 | F23C8.7 | WBGene00017736 | WP:CE20716
UTGB	GTSSWA200110.01	outron	ubxn-1	F23C8.4	chrI	2433789	+	13	0	223	216	CE20713 | F23C8.4 | WBGene00017733 | WP:CE20713 | ubxn-1
UTGB	GTSSWA200111.01	outron	eif-3.I	Y74C10AR.1	chrI	2485712	+	10	0	158	156	CE30325 | WBGene00001232 | WP:CE30325 | Y74C10AR.1 | eif-3.I
UTGB	GTSSWA200112.01	outron	Y23H5B.6	Y23H5B.6	chrI	2489954	+	10	0	31	23	CE25231 | WBGene00021277 | WP:CE25231 | Y23H5B.6
UTGB	GTSSWA200113.01	exon	Y23H5B.7	Y23H5B.7a	chrI	2514241	-	19	1.644	529	-1	CE27597 | CE30317 | CE33208 | WBGene00021278 | WP:CE27597 | WP:CE30317 | WP:CE33208 | Y23H5B.7 | Y23H5B.7a | Y23H5B.7b | Y23H5B.7c | Y23H5B.7c.1 | Y23H5B.7c.2
UTGB	GTSSWA200114.01	exon	C55C2.4	C55C2.4	chrI	2558161	+	15	0	140	-1	C55C2.4 | CE36639 | WBGene00016950 | WP:CE36639
UTGB	GTSSWA200115.01	exon	ssp-19	C55C2.2	chrI	2562622	+	17	0	47	-1	C55C2.2 | CE09025 | WBGene00006047 | WP:CE09025 | ssp-19
UTGB	GTSSWA200116.01	outron	fbp-1	K07A3.1.1	chrI	2587340	-	39	1.421	1216	1214	CE21023 | K07A3.1 | K07A3.1.1 | K07A3.1.2 | K07A3.1.3 | WBGene00001404 | WP:CE21023 | fbp | fbp-1
UTGB	GTSSWA200117.01	exon	Y23H5A.4	Y23H5A.4	chrI	2617519	+	28	0.6318	42	-1	CE18360 | WBGene00021271 | WP:CE18360 | Y23H5A.4
UTGB	GTSSWA200118.01	outron	Y23H5A.3	Y23H5A.3	chrI	2620574	+	16	1.935	86	83	CE18359 | WBGene00021270 | WP:CE18359 | Y23H5A.3
UTGB	GTSSWA200119.01	outron	F40E3.2	F40E3.2	chrI	2642511	+	22	2.109	230	214	CE34307 | F40E3.2 | WBGene00018230 | WP:CE34307
UTGB	GTSSWA200120.01	outron	F32B5.7	F32B5.7.1	chrI	2682925	-	14	0	195	126	CE30526 | F32B5.7 | F32B5.7.1 | F32B5.7.2 | WBGene00017980 | WP:CE30526
UTGB	GTSSWA200121.05	exon	cpz-1	F32B5.8	chrI	2689444	-	584	0.3859	27	-1	CE36646 | F32B5.8 | WBGene00000788 | WP:CE36646 | cpz-1
UTGB	GTSSWA200122.01	exon	F32B5.4	F32B5.4	chrI	2692078	+	42	0	32	-1	CE09852 | F32B5.4 | WBGene00017978 | WP:CE09852
UTGB	GTSSWA200123.01	outron	yop-1	Y71F9B.3.1	chrI	2728761	+	46	0	1250	1244	CE24624 | WBGene00022127 | WP:CE24624 | Y71F9B.3 | Y71F9B.3.1 | Y71F9B.3.2 | yop-1
UTGB	GTSSWA200124.01	exon	Y71F9B.15	Y71F9B.15	chrI	2784310	-	15	2.024	37	-1	CE22851 | WBGene00022133 | WP:CE22851 | Y71F9B.15
UTGB	GTSSWA200125.01	outron	W03D8.9	W03D8.9	chrI	2786069	-	12	0	271	214	CE26983 | W03D8.9 | W03D8.9.1 | W03D8.9.2 | WBGene00020990 | WP:CE26983
UTGB	GTSSWA200126.01	outron	itx-1	W03D8.6	chrI	2800966	+	34	1.611	1857	1844	CE40143 | W03D8.6 | WBGene00002174 | WP:CE40143 | itx-1
UTGB	GTSSWA200127.01	outron	W03D8.3	W03D8.3	chrI	2822135	-	10	2.368	48	16	CE26953 | W03D8.3 | WBGene00020986 | WP:CE26953
UTGB	GTSSWA200128.01	exon	W10C8.4	W10C8.4a	chrI	2853859	-	92	3.428	61	-1	CE30703 | CE33586 | W10C8.4 | W10C8.4a | W10C8.4b | WBGene00021127 | WP:CE30703 | WP:CE33586
UTGB	GTSSWA200129.02	exon	W10C8.6	W10C8.6	chrI	2859855	-	162	3.618	15	-1	CE38736 | W10C8.6 | WBGene00044433 | WP:CE38736
UTGB	GTSSWA200130.01	outron	Y71F9AL.12	Y71F9AL.12	chrI	2875370	-	12	1.926	79	79	CE40170 | WBGene00022117 | WP:CE40170 | Y71F9AL.12
UTGB	GTSSWA200131.03	outron	rpl-1	Y71F9AL.13a.1	chrI	2876454	-	435	14.18	150	144	CE25552 | CE28379 | WBGene00004412 | WP:CE25552 | WP:CE28379 | Y71F9AL.13 | Y71F9AL.13a | Y71F9AL.13a.1 | Y71F9AL.13a.2 | Y71F9AL.13b | Y71F9AL.13b.1 | Y71F9AL.13b.2 | Y71F9AL.13b.3 | Y71F9AL.13b.4 | Y71F9AL.13b.5 | Y71F9AL.13b.6 | Y71F9AL.13b.7 | Y71F9AL.13b.8 | Y71F9AL.13b.9 | Y71F9AL.13c | Y71F9AL.13d | rpl-1 | rpl-10a
UTGB	GTSSWA200132.01	outron	Y71F9AL.9	Y71F9AL.9.1	chrI	2876629	+	13	1.015	308	304	CE22858 | WBGene00022114 | WP:CE22858 | Y71F9AL.9 | Y71F9AL.9.1 | Y71F9AL.9.2
UTGB	GTSSWA200133.03	outron	Y71F9AL.8	Y71F9AL.8	chrI	2878157	+	55	5.999	422	422	CE25560 | WBGene00022113 | WP:CE25560 | Y71F9AL.8
UTGB	GTSSWA200134.04	outron	dnc-5	Y71F9AL.14.2	chrI	2883785	-	20	10.39	343	343	CE27022 | WBGene00022118 | WP:CE27022 | Y71F9AL.14 | Y71F9AL.14.1 | Y71F9AL.14.2 | dnc-5
UTGB	GTSSWA200135.01	exon	Y71F9AL.7	Y71F9AL.7	chrI	2887785	+	19	0	16	-1	CE22861 | WBGene00022112 | WP:CE22861 | Y71F9AL.7
UTGB	GTSSWA200136.01	outron	pme-1	Y71F9AL.18.1	chrI	2925543	-	23	5.191	847	828	CE25556 | WBGene00004049 | WP:CE25556 | Y71F9AL.18 | Y71F9AL.18.1 | Y71F9AL.18.2 | pme-1
UTGB	GTSSWA200137.02	outron	Y71F9AL.1	Y71F9AL.1	chrI	2925229	+	43	0	17	12	CE29909 | WBGene00022107 | WP:CE29909 | Y71F9AL.1
UTGB	GTSSWA200138.05	outron	trap-1	Y71F9AM.6.1	chrI	2928348	+	279	10.58	50	48	CE26244 | WBGene00022122 | WP:CE26244 | Y71F9AM.6 | Y71F9AM.6.1 | Y71F9AM.6.2 | trap-1
UTGB	GTSSWA200139.04	outron	nxt-1	Y71F9AM.5b	chrI	2929792	+	136	0.7504	49	42	CE26780 | CE41072 | NXT1 | WBGene00003836 | WP:CE26780 | WP:CE41072 | Y71F9AM.5 | Y71F9AM.5a | Y71F9AM.5b | nxt-1
UTGB	GTSSWA200141.02	exon	Y54E10BR.2	Y54E10BR.2.1	chrI	3032988	+	100	1.722	19	-1	CE22471 | WBGene00021841 | WP:CE22471 | Y54E10BR.2 | Y54E10BR.2.1 | Y54E10BR.2.2 | Y54E10BR.2.3
UTGB	GTSSWA200142.01	exon	ztf-23	Y54E10BR.8	chrI	3059147	-	115	6.925	74	-1	CE27284 | WBGene00021846 | WP:CE27284 | Y54E10BR.8 | ztf-23
UTGB	GTSSWA200143.04	exon	Y54E10BR.1	Y54E10BR.1	chrI	3059236	+	251	0.9312	79	-1	CE34410 | CE36244 | WBGene00021840 | WP:CE34410 | WP:CE36244 | Y54E10BR.1 | Y54E10BR.1a | Y54E10BR.1b
UTGB	GTSSWA200144.02	outron	arx-7	M01B12.3	chrI	3071283	-	22	14.27	1141	1135	CE18061 | M01B12.3 | WBGene00000205 | WP:CE18061 | arx-7
UTGB	GTSSWA200145.05	outron	M01B12.4	M01B12.4a.1	chrI	3085424	-	38	1.115	585	548	CE29982 | CE30554 | CE37031 | M01B12.4 | M01B12.4a | M01B12.4a.1 | M01B12.4a.2 | M01B12.4b | M01B12.4c | WBGene00019697 | WP:CE29982 | WP:CE30554 | WP:CE37031
UTGB	GTSSWA200146.01	outron	nhr-64	C45E1.1b	chrI	3101950	+	45	3.203	2419	2414	C45E1.1 | C45E1.1a | C45E1.1b | CE39696 | CE39697 | WBGene00003654 | WP:CE39696 | WP:CE39697 | nhr-64
UTGB	GTSSWA200147.02	exon	col-49	K09H9.3	chrI	3137194	+	385	1.627	16	-1	CE18038 | K09H9.3 | WBGene00000626 | WP:CE18038 | col-49
UTGB	GTSSWA200148.01	exon	K09H9.8	K09H9.8	chrI	3140602	-	26	0	33	-1	CE40977 | K09H9.8 | WBGene00045387 | WP:CE40977
UTGB	GTSSWA200149.02	exon	K09H9.5	K09H9.5	chrI	3143176	-	39	0.4934	6	-1	CE33146 | K09H9.5 | WBGene00019597 | WP:CE33146
UTGB	GTSSWA200150.01	outron	lpd-6	K09H9.6	chrI	3147823	-	24	0	37	28	CE37030 | K09H9.6 | K09H9.6.1 | K09H9.6.2 | WBGene00003062 | WP:CE37030 | lpd-6
UTGB	GTSSWA200151.02	outron	K09H9.2	K09H9.2.1	chrI	3147990	+	19	0	28	25	CE34336 | K09H9.2 | K09H9.2.1 | K09H9.2.2 | WBGene00019595 | WP:CE34336
UTGB	GTSSWA200152.02	outron	K09H9.7	K09H9.7	chrI	3152090	-	54	0.9054	109	92	CE39596 | K09H9.7 | WBGene00019598 | WP:CE39596
UTGB	GTSSWA200153.01	exon	K09H9.1	K09H9.1	chrI	3152555	+	167	0.4287	281	-1	CE36701 | K09H9.1 | WBGene00019594 | WP:CE36701
UTGB	GTSSWA200154.01	exon	vbh-1	Y54E10A.9a	chrI	3162290	-	30	1.365	5	-1	CE24451 | CE28369 | CE37437 | WBGene00006888 | WP:CE24451 | WP:CE28369 | WP:CE37437 | Y54E10A.9 | Y54E10A.9a | Y54E10A.9a.1 | Y54E10A.9a.2 | Y54E10A.9b | Y54E10A.9c | vbh-1
UTGB	GTSSWA200155.01	outron	Y54E10A.11	Y54E10A.11	chrI	3192762	-	13	0	64	20	CE37436 | WBGene00021831 | WP:CE37436 | Y54E10A.11
UTGB	GTSSWA200156.01	outron	Y54E10A.12	Y54E10A.12	chrI	3198921	-	10	0	88	81	CE24441 | WBGene00021832 | WP:CE24441 | Y54E10A.12
UTGB	GTSSWA200157.02	outron	Y54E10A.17	Y54E10A.17.1	chrI	3206773	+	34	0.8867	32	29	CE30044 | WBGene00021835 | WP:CE30044 | Y54E10A.17 | Y54E10A.17.1 | Y54E10A.17.2
UTGB	GTSSWA200158.06	exon	cdt-1	Y54E10A.15	chrI	3228023	-	50	0.4918	54	-1	CE22447 | WBGene00000413 | WP:CE22447 | Y54E10A.15 | cdt-1
UTGB	GTSSWA200159.01	outron	zip-4	Y44E3B.1b.1	chrI	3266721	-	55	6.002	865	864	CE18390 | CE28364 | CE39837 | WBGene00021552 | WP:CE18390 | WP:CE28364 | WP:CE39837 | Y44E3B.1 | Y44E3B.1a | Y44E3B.1b | Y44E3B.1b.1 | Y44E3B.1b.2 | Y44E3B.1c | zip-4
UTGB	GTSSWA200160.01	exon	sulp-6	W01B11.2	chrI	3287359	+	10	0	121	-1	CE41032 | W01B11.2 | WBGene00020914 | WP:CE41032 | sulp-6
UTGB	GTSSWA200161.01	outron	W01B11.6	W01B11.6a.1	chrI	3297097	-	64	0	2748	2739	CE26952 | W01B11.6 | W01B11.6a | W01B11.6a.1 | W01B11.6a.2 | W01B11.6b | WBGene00020917 | WP:CE26952
UTGB	GTSSWA200162.02	outron	Y44E3A.3	Y44E3A.3	chrI	3319068	-	10	1.699	491	482	CE21928 | WBGene00021548 | WP:CE21928 | Y44E3A.3
UTGB	GTSSWA200163.01	outron	W05F2.6	W05F2.6	chrI	3368806	+	12	0	55	46	CE42028 | W05F2.6 | WBGene00021038 | WP:CE42028
UTGB	GTSSWA200164.01	outron	W05F2.4	W05F2.4a	chrI	3405682	-	10	0	2869	2816	CE30702 | CE37251 | CE44027 | W05F2.4 | W05F2.4a | W05F2.4a.1 | W05F2.4a.2 | W05F2.4b | W05F2.4b.1 | W05F2.4b.2 | W05F2.4c | WBGene00021036 | WP:CE30702 | WP:CE37251 | WP:CE44027
UTGB	GTSSWA200165.01	exon	K03E5.2	K03E5.2a	chrI	3419639	+	103	2.442	41	-1	CE37532 | CE37655 | CE39582 | CE43618 | K03E5.2 | K03E5.2a | K03E5.2b | K03E5.2c | K03E5.2c.1 | K03E5.2c.2 | K03E5.2d | WBGene00019361 | WP:CE37532 | WP:CE37655 | WP:CE39582 | WP:CE43618
UTGB	GTSSWA200166.01	exon	Y47G6A.13	Y47G6A.13	chrI	3442232	-	36	0	42	-1	CE22097 | WBGene00021639 | WP:CE22097 | Y47G6A.13
UTGB	GTSSWA200167.02	exon	Y47G6A.15	Y47G6A.15	chrI	3476312	-	716	0.3497	19	-1	CE22105 | WBGene00021641 | WP:CE22105 | Y47G6A.15
UTGB	GTSSWA200168.01	outron	Y47G6A.7	Y47G6A.7a.1	chrI	3502874	+	14	0.6969	54	30	CE24373 | CE37067 | WBGene00021637 | WP:CE24373 | WP:CE37067 | Y47G6A.7 | Y47G6A.7a | Y47G6A.7a.1 | Y47G6A.7a.2 | Y47G6A.7a.3 | Y47G6A.7b | Y47G6A.7b.1 | Y47G6A.7b.2
UTGB	GTSSWA200169.04	exon	pcaf-1	Y47G6A.6	chrI	3516515	+	180	4.41	39	-1	CE24372 | WBGene00021636 | WP:CE24372 | Y47G6A.6 | pcaf-1
UTGB	GTSSWA200170.01	exon	Y47G6A.19	Y47G6A.19b	chrI	3529907	-	17	1.867	62	-1	CE31374 | CE34404 | CE37065 | CE41051 | WBGene00021645 | WBGene00021653 | WP:CE31374 | WP:CE34404 | WP:CE37065 | WP:CE41051 | Y47G6A.19 | Y47G6A.19a | Y47G6A.19b | Y47G6A.19c | Y47G6A.30
UTGB	GTSSWA200171.01	exon	Y47G6A.4	Y47G6A.4	chrI	3547095	+	11	1.593	35	-1	CE24371 | WBGene00021634 | WP:CE24371 | Y47G6A.4
UTGB	GTSSWA200172.02	outron	Y47G6A.22	Y47G6A.22	chrI	3562895	-	52	0	48	41	CE24368 | WBGene00021647 | WP:CE24368 | Y47G6A.22 | Y47G6A.22.1 | Y47G6A.22.2
UTGB	GTSSWA200174.01	exon	Y47G6A.3	Y47G6A.3	chrI	3601293	+	49	0.468	729	-1	CE22076 | WBGene00021633 | WP:CE22076 | Y47G6A.3 | Y47G6A.3.1 | Y47G6A.3.2
UTGB	GTSSWA200176.01	exon	Y47G6A.26	Y47G6A.26	chrI	3619683	-	17	0.6392	44	-1	CE22084 | WBGene00021650 | WP:CE22084 | Y47G6A.26
UTGB	GTSSWA200177.02	outron	D1037.3.1	D1037.3.1	chrI	3681967	-	33	0	1065	1037	CE20622 | D1037.3 | D1037.3.1 | D1037.3.2 | D1037.3.3 | D1037.3.4 | WBGene00001501 | WP:CE20622 | ftn-2
UTGB	GTSSWA200178.01	outron	rab-8	D1037.4	chrI	3684115	-	98	1.928	53	26	CE30373 | D1037.4 | WBGene00004272 | WP:CE30373 | rab-8 | rab8
UTGB	GTSSWA200179.01	exon	D1037.5	D1037.5	chrI	3694024	-	20	0	7	-1	CE44106 | D1037.5 | WBGene00017026 | WP:CE44106
UTGB	GTSSWA200180.01	outron	msh-2	H26D21.2	chrI	3697620	-	12	0	82	68	CE21000 | H26D21.2 | H26D21.2.1 | H26D21.2.2 | WBGene00003418 | WP:CE21000 | msh-2
UTGB	GTSSWA200181.04	outron	glh-4	T12F5.3.1	chrI	3726842	+	109	0.8535	221	187	CE29052 | T12F5.3 | T12F5.3.1 | T12F5.3.2 | WBGene00001601 | WP:CE29052 | glh-4
UTGB	GTSSWA200182.01	exon	larp-5	T12F5.5a	chrI	3741252	-	17	2.594	915	-1	CE34368 | CE39278 | T12F5.5 | T12F5.5a | T12F5.5b | WBGene00004147 | WP:CE34368 | WP:CE39278 | larp-2 | larp-5 | pqn-64
UTGB	GTSSWA200183.01	outron	inx-12	ZK770.3.1	chrI	3759075	-	10	0	81	33	CE15413 | WBGene00002134 | WP:CE15413 | ZK770.3 | ZK770.3.1 | ZK770.3.2 | inx-12 | opu-12
UTGB	GTSSWA200184.02	exon	C32E8.4	C32E8.4.1	chrI	3783897	+	95	1.708	47	-1	C32E8.4 | C32E8.4.1 | C32E8.4.2 | CE29692 | WBGene00016322 | WP:CE29692
UTGB	GTSSWA200185.01	outron	rpl-13	C32E8.2a.1	chrI	3787874	+	27	12.46	170	164	C32E8.2 | C32E8.2a | C32E8.2a.1 | C32E8.2a.2 | C32E8.2b | C32E8.2b.1 | C32E8.2b.2 | CE08526 | CE33562 | WBGene00004425 | WP:CE08526 | WP:CE33562 | rpl-13
UTGB	GTSSWA200186.01	outron	C32E8.11	C32E8.11	chrI	3818910	-	15	0	2111	2098	C32E8.11 | CE40441 | WBGene00016326 | WP:CE40441
UTGB	GTSSWA200187.01	outron	npp-11	F53F10.5.1	chrI	3817956	+	18	0	125	120	CE10988 | F53F10.5 | F53F10.5.1 | F53F10.5.2 | WBGene00003797 | WP:CE10988 | npp-11
UTGB	GTSSWA200188.01	outron	unc-108	F53F10.4	chrI	3822944	+	16	0	2009	2005	CE10986 | F53F10.4 | F53F10.4.1 | F53F10.4.2 | WBGene00006833 | WP:CE10986 | rab-2 | unc-108 | unc-67
UTGB	GTSSWA200189.01	outron	F53F10.2	F53F10.2b.2	chrI	3829531	+	17	1.629	2717	1833	CE10982 | CE30374 | F53F10.2 | F53F10.2a | F53F10.2a.1 | F53F10.2a.2 | F53F10.2b | F53F10.2b.1 | F53F10.2b.2 | F53F10.2b.3 | F53F10.2b.4 | WBGene00018764 | WP:CE10982 | WP:CE30374
UTGB	GTSSWA200190.01	exon	F53F10.1	F53F10.1	chrI	3837786	-	67	1.538	35	-1	CE10980 | F53F10.1 | WBGene00018763 | WP:CE10980
UTGB	GTSSWA200191.01	outron	hcp-4	T03F1.9	chrI	3866546	-	42	0	606	605	CE13112 | T03F1.9 | WBGene00001832 | WP:CE13112 | hcp-4
UTGB	GTSSWA200192.01	outron	pgk-1	T03F1.3	chrI	3867431	+	16	2.333	123	119	CE13100 | T03F1.3 | T03F1.3.1 | T03F1.3.2 | WBGene00020185 | WP:CE13100 | pgk-1
UTGB	GTSSWA200193.01	exon	clec-53	T03F1.10	chrI	3873418	-	185	1.178	19	-1	CE38630 | T03F1.10 | WBGene00020191 | WP:CE38630 | clec-53
UTGB	GTSSWA200194.04	outron	C50F2.3	C50F2.3	chrI	3875770	+	136	4.611	1298	1295	C50F2.3 | C50F2.3.1 | C50F2.3.2 | CE08909 | WBGene00016837 | WP:CE08909 | phi-4
UTGB	GTSSWA200195.01	exon	abf-2	C50F2.10	chrI	3885907	-	83	0.7994	16	-1	C50F2.10 | CE27876 | WBGene00000013 | WP:CE27876 | abf-2
UTGB	GTSSWA200196.01	outron	abf-1	C50F2.9	chrI	3887114	-	12	10.34	31	20	C50F2.9 | CE27879 | WBGene00000012 | WP:CE27879 | abf-1
UTGB	GTSSWA200197.05	exon	C50F2.4	C50F2.4	chrI	3891531	-	117	0.7343	10	-1	C50F2.4 | C50F2.4.1 | C50F2.4.2 | CE08910 | WBGene00016838 | WP:CE08910
UTGB	GTSSWA200198.01	exon	C50F2.5	C50F2.5	chrI	3897412	-	40	0	59	-1	C50F2.5 | CE08911 | WBGene00016839 | WP:CE08911
UTGB	GTSSWA200199.02	outron	pbs-4	T20F5.2	chrI	3908735	+	24	1.802	19	14	CE13818 | T20F5.2 | T20F5.2.1 | T20F5.2.2 | WBGene00003950 | WP:CE13818 | pbs-4
UTGB	GTSSWA200200.01	exon	T20F5.5	T20F5.5	chrI	3920541	-	11	0	1365	-1	CE43999 | T20F5.5 | WBGene00020627 | WP:CE43999
UTGB	GTSSWA200201.01	outron	T20F5.6	T20F5.6.1	chrI	3925800	-	16	14.63	674	635	CE28685 | T20F5.6 | T20F5.6.1 | T20F5.6.2 | WBGene00020628 | WP:CE28685
UTGB	GTSSWA200202.01	outron	egg-4	T21E3.1	chrI	3932034	+	10	0.8493	180	178	CE13874 | T21E3.1 | WBGene00020652 | WP:CE13874 | egg-4
UTGB	GTSSWA200203.01	exon	F47B3.4	F47B3.4	chrI	3960976	+	18	0	63	-1	CE10622 | F47B3.4 | WBGene00018528 | WP:CE10622
UTGB	GTSSWA200204.02	exon	F47B3.7	F47B3.7	chrI	3970019	-	60	0.5712	75	-1	CE10628 | F47B3.7 | WBGene00018531 | WP:CE10628
UTGB	GTSSWA200205.02	outron	aars-2	F28H1.3.1	chrI	3982986	+	80	6.703	221	200	CE09768 | F28H1.3 | F28H1.3.1 | F28H1.3.2 | F28H1.3.3 | WBGene00000197 | WP:CE09768 | aars-2
UTGB	GTSSWA200206.01	exon	F28H1.2.1	F28H1.2.1	chrI	3987942	+	1349	3.165	38	-1	CE09767 | F28H1.2 | F28H1.2.1 | F28H1.2.2 | WBGene00000779 | WP:CE09767 | cpn-3
UTGB	GTSSWA200207.04	exon	unc-89	C09D1.1b	chrI	4035748	+	483	1.271	146	-1	C09D1.1 | C09D1.1a | C09D1.1b | C09D1.1c | C09D1.1d | C09D1.1e | C09D1.1f | C09D1.1g | CE30426 | CE34251 | CE34252 | CE37701 | CE37702 | CE37703 | CE37704 | WBGene00006820 | WP:CE30426 | WP:CE34251 | WP:CE34252 | WP:CE37701 | WP:CE37702 | WP:CE37703 | WP:CE37704 | phm-1 | unc-89
UTGB	GTSSWA200208.01	outron	cyb-2.2	H31G24.4	chrI	4114711	+	13	0	168	137	CE23835 | H31G24.4 | H31G24.4.1 | H31G24.4.2 | WBGene00000867 | WP:CE23835 | cyb-2.2
UTGB	GTSSWA200209.03	exon	E01A2.4	E01A2.4.1	chrI	4132246	-	98	4.826	52	-1	CE24871 | E01A2.4 | E01A2.4.1 | E01A2.4.2 | WBGene00017086 | WP:CE24871
UTGB	GTSSWA200210.01	outron	E01A2.2	E01A2.2a	chrI	4132384	+	52	16.6	118	117	CE20643 | CE33369 | E01A2.2 | E01A2.2a | E01A2.2a.1 | E01A2.2a.2 | E01A2.2b | E01A2.2b.1 | E01A2.2b.2 | WBGene00017085 | WP:CE20643 | WP:CE33369
UTGB	GTSSWA200211.01	outron	E01A2.6	E01A2.6	chrI	4139414	-	175	5.808	467	460	CE24873 | E01A2.6 | E01A2.6.1 | E01A2.6.2 | E01A2.6.3 | WBGene00017088 | WP:CE24873
UTGB	GTSSWA200212.04	exon	E01A2.10	E01A2.10	chrI	4147137	-	134	4.409	40	-1	CE20637 | E01A2.10 | E01A2.10.1 | E01A2.10.2 | WBGene00077701 | WP:CE20637
UTGB	GTSSWA200213.01	exon	R12E2.15	R12E2.15	chrI	4149430	-	224	0.7433	17	-1	CE18147 | R12E2.15 | R12E2.15.1 | R12E2.15.2 | WBGene00020040 | WP:CE18147
UTGB	GTSSWA200214.02	exon	R12E2.14	R12E2.14	chrI	4149982	+	258	0.482	19	-1	CE18146 | R12E2.14 | R12E2.14.1 | R12E2.14.2 | WBGene00020039 | WP:CE18146
UTGB	GTSSWA200215.01	exon	R12E2.7	R12E2.7	chrI	4154439	-	142	0.9571	33	-1	CE18139 | R12E2.7 | R12E2.7.1 | R12E2.7.2 | WBGene00020033 | WP:CE18139
UTGB	GTSSWA200216.01	exon	egg-5	R12E2.10	chrI	4171719	-	13	5.522	130	-1	CE18142 | R12E2.10 | WBGene00020035 | WP:CE18142 | egg-5
UTGB	GTSSWA200217.02	outron	R12E2.12	R12E2.12	chrI	4175008	-	13	0	267	232	CE33159 | R12E2.12 | R12E2.12.1 | R12E2.12.2 | WBGene00020037 | WP:CE33159
UTGB	GTSSWA200218.01	outron	R12E2.13	R12E2.13.1	chrI	4178544	-	15	0	107	95	CE18145 | R12E2.13 | R12E2.13.1 | R12E2.13.2 | WBGene00020038 | WP:CE18145
UTGB	GTSSWA200219.01	outron	R12E2.1	R12E2.1	chrI	4181745	+	11	3.864	477	477	CE44841 | R12E2.1 | R12E2.1.1 | R12E2.1.2 | WBGene00020030 | WP:CE44841
UTGB	GTSSWA200220.01	exon	C18E3.1	C18E3.1	chrI	4212712	+	43	1.446	32	-1	C18E3.1 | CE27712 | WBGene00015970 | WP:CE27712
UTGB	GTSSWA200221.02	exon	C18E3.9	C18E3.9a	chrI	4215750	-	122	4.33	80	-1	C18E3.9 | C18E3.9a | C18E3.9b | CE27716 | CE40905 | WBGene00015976 | WP:CE27716 | WP:CE40905
UTGB	GTSSWA200222.01	outron	C43E11.5	C43E11.5	chrI	4236975	+	57	0	60	25	C43E11.5 | CE08683 | WBGene00016605 | WP:CE08683
UTGB	GTSSWA200223.01	exon	exoc-7	C43E11.8	chrI	4247583	-	16	0	1	-1	C43E11.8 | CE08686 | WBGene00016606 | WP:CE08686 | exoc-7
UTGB	GTSSWA200224.01	outron	tufm-2	C43E11.4	chrI	4247647	+	25	0.6624	115	110	C43E11.4 | CE32610 | EF-Tu2 | WBGene00007001 | WP:CE32610 | tufm-2
UTGB	GTSSWA200225.01	outron	mus-81	C43E11.2a	chrI	4264487	+	15	7.809	623	623	C43E11.2 | C43E11.2a | C43E11.2a.1 | C43E11.2a.2 | C43E11.2b | CE08680 | CE32609 | WBGene00016602 | WP:CE08680 | WP:CE32609 | mus-81
UTGB	GTSSWA200226.01	outron	cdc-6	C43E11.10	chrI	4270493	-	32	1.038	204	204	C43E11.10 | CE08688 | WBGene00000382 | WP:CE08688 | cdc-6
UTGB	GTSSWA200227.02	outron	acin-1	C43E11.1	chrI	4270648	+	52	2.067	88	73	C43E11.1 | CE23592 | WBGene00016601 | WP:CE23592 | acin-1
UTGB	GTSSWA200228.01	exon	Y47D9A.5	Y47D9A.5.1	chrI	4279623	-	19	0.7603	45	-1	CE40216 | WBGene00021632 | WP:CE40216 | Y47D9A.5 | Y47D9A.5.1 | Y47D9A.5.2
UTGB	GTSSWA200229.01	outron	scpl-3	Y47D9A.2b	chrI	4298422	+	11	0	205	57	CE22072 | CE33227 | WBGene00021629 | WP:CE22072 | WP:CE33227 | Y47D9A.2 | Y47D9A.2a | Y47D9A.2b | scpl-3
UTGB	GTSSWA200230.01	outron	Y47D9A.1	Y47D9A.1a	chrI	4302482	+	10	0	1523	1449	CE22073 | CE24353 | WBGene00021628 | WP:CE22073 | WP:CE24353 | Y47D9A.1 | Y47D9A.1a | Y47D9A.1b
UTGB	GTSSWA200231.01	exon	anc-1	ZK973.6	chrI	4320889	+	35	0	207	-1	CE33588 | WBGene00000140 | WP:CE33588 | ZK973.6 | anc-1
UTGB	GTSSWA200232.01	exon	ZK973.8	ZK973.8	chrI	4367910	-	17	0	959	-1	CE24754 | WBGene00022834 | WP:CE24754 | ZK973.8
UTGB	GTSSWA200233.02	exon	ZK973.11	ZK973.11	chrI	4381826	-	44	0.5215	54	-1	CE29654 | WBGene00022836 | WP:CE29654 | ZK973.11
UTGB	GTSSWA200234.02	outron	ZK973.1	ZK973.1	chrI	4381931	+	30	0	635	635	CE24746 | WBGene00022830 | WP:CE24746 | ZK973.1
UTGB	GTSSWA200235.01	outron	Y119C1B.4	Y119C1B.4	chrI	4511228	-	22	0	102	100	CE27233 | WBGene00022470 | WP:CE27233 | Y119C1B.4
UTGB	GTSSWA200236.02	outron	bet-1	Y119C1B.8a	chrI	4536035	-	14	0	1235	1235	CE33207 | CE44037 | WBGene00022473 | WP:CE33207 | WP:CE44037 | Y119C1B.8 | Y119C1B.8a | Y119C1B.8b | Y119C1B.8b.1 | Y119C1B.8b.2 | bet-1 | tag-332
UTGB	GTSSWA200237.08	outron	pqn-24	D1007.14	chrI	4564080	+	381	0.9286	61	51	CE39094 | D1007.14 | WBGene00004113 | WP:CE39094 | pqn-24
UTGB	GTSSWA200238.02	outron	D1007.18	D1007.18	chrI	4579723	-	29	2.645	35	18	CE40197 | D1007.18 | WBGene00044421 | WP:CE40197
UTGB	GTSSWA200239.06	outron	rps-10	D1007.6.1	chrI	4584745	-	32	0.8782	252	238	CE09041 | D1007.6 | D1007.6.1 | D1007.6.2 | WBGene00004479 | WP:CE09041 | rps-10
UTGB	GTSSWA200241.01	outron	nrd-1	D1007.7	chrI	4602999	-	11	0	358	331	CE26916 | D1007.7 | WBGene00017004 | WP:CE26916 | nrd-1
UTGB	GTSSWA200242.03	outron	acbp-1	C44E4.6.2	chrI	4636404	-	44	0.5215	61	23	C44E4.6 | C44E4.6.1 | C44E4.6.2 | C44E4.6.3 | CE08720 | WBGene00016655 | WP:CE08720 | acbp-1
UTGB	GTSSWA200243.01	outron	rpl-4	B0041.4.1	chrI	4647130	-	25	1.312	171	165	B0041.4 | B0041.4.1 | B0041.4.2 | CE07669 | WBGene00004415 | WP:CE07669 | rpl-4
UTGB	GTSSWA200244.05	outron	B0041.8	B0041.8.1	chrI	4647349	+	309	1.262	76	76	B0041.8 | B0041.8.1 | B0041.8.2 | CE29528 | WBGene00015011 | WP:CE29528
UTGB	GTSSWA200245.01	exon	B0041.1	B0041.1	chrI	4664500	+	39	1.48	372	-1	B0041.1 | CE45125 | WBGene00015006 | WP:CE45125
UTGB	GTSSWA200246.01	outron	xnp-1	B0041.7	chrI	4672218	-	13	0	502	478	B0041.7 | CE17314 | WBGene00006961 | WP:CE17314 | slr-8 | xnp-1
UTGB	GTSSWA200247.01	outron	W09C3.7	W09C3.7	chrI	4715484	-	221	0	321	274	CE14756 | W09C3.7 | WBGene00021114 | WP:CE14756
UTGB	GTSSWA200248.01	exon	W09C3.8	W09C3.8	chrI	4717451	-	25	0.5574	8	-1	CE39115 | W09C3.8 | WBGene00021115 | WP:CE39115
UTGB	GTSSWA200249.01	exon	W09C3.1	W09C3.1	chrI	4717558	+	16	0	66	-1	CE39114 | W09C3.1 | WBGene00021109 | WP:CE39114
UTGB	GTSSWA200250.01	exon	C10H11.7	C10H11.7	chrI	4719760	+	14	3.657	44	-1	C10H11.7 | CE08096 | WBGene00015696 | WP:CE08096
UTGB	GTSSWA200251.01	exon	ugt-26	C10H11.6a	chrI	4721179	+	15	0	28	-1	C10H11.6 | C10H11.6a | C10H11.6b | CE30597 | CE42349 | WBGene00015695 | WP:CE30597 | WP:CE42349 | ugt-26
UTGB	GTSSWA200252.02	exon	ugt-28	C10H11.4	chrI	4727309	+	194	0.769	23	-1	C10H11.4 | CE08093 | WBGene00015693 | WP:CE08093 | ugt-28
UTGB	GTSSWA200253.01	exon	ugt-25	C10H11.3	chrI	4731607	+	37	0	17	-1	C10H11.3 | CE08092 | WBGene00015692 | WP:CE08092 | ugt-25
UTGB	GTSSWA200254.01	outron	C10H11.8	C10H11.8	chrI	4738563	-	11	0	777	463	C10H11.8 | CE08097 | WBGene00015697 | WP:CE08097
UTGB	GTSSWA200255.01	outron	M04F3.3	M04F3.3	chrI	4765206	-	40	0.6006	64	36	CE39108 | M04F3.3 | WBGene00019769 | WP:CE39108
UTGB	GTSSWA200256.01	outron	rpa-2	M04F3.1.1	chrI	4768022	+	15	0	2283	2271	CE12414 | M04F3.1 | M04F3.1.1 | M04F3.1.2 | M04F3.1.3 | WBGene00019767 | WP:CE12414 | rpa-2
UTGB	GTSSWA200257.02	outron	M04F3.4	M04F3.4	chrI	4773061	-	10	0	35	35	CE40264 | M04F3.4 | M04F3.4a | M04F3.4b | WBGene00019770 | WP:CE40264
UTGB	GTSSWA200258.01	outron	F54D7.6	F54D7.6	chrI	4789061	+	14	2.548	533	168	F54D7.6 | WBGene00023067
UTGB	GTSSWA200259.03	outron	F54D7.7	F54D7.7	chrI	4790131	+	96	0.5374	524	162	F54D7.7 | WBGene00023068
UTGB	GTSSWA200260.01	exon	zig-7	F54D7.4	chrI	4792485	-	17	0	8	-1	CE33929 | F54D7.4 | WBGene00006984 | WP:CE33929 | zig-7
UTGB	GTSSWA200261.01	outron	htp-3	F57C9.5	chrI	4826984	+	29	5.032	96	89	CE11330 | F57C9.5 | WBGene00002034 | WP:CE11330 | htp-3
UTGB	GTSSWA200262.01	outron	glc-2	F25F8.2	chrI	4888003	-	31	1.159	60	43	CE09636 | F25F8.2 | WBGene00001592 | WP:CE09636 | avm-2 | glc-2
UTGB	GTSSWA200263.03	exon	F21F3.4	F21F3.4	chrI	4895980	+	64	0.519	24	-1	CE41225 | F21F3.4 | WBGene00017674 | WP:CE41225
UTGB	GTSSWA200264.01	exon	F21F3.3	F21F3.3	chrI	4901973	+	23	0	26	-1	CE09533 | F21F3.3 | WBGene00017673 | WP:CE09533
UTGB	GTSSWA200265.02	outron	imb-1	F28B3.8	chrI	4926510	-	18	0	313	275	CE30523 | F28B3.8 | F28B3.8.1 | F28B3.8.2 | WBGene00002075 | WP:CE30523 | imb-1
UTGB	GTSSWA200266.04	outron	F28B3.5	F28B3.5a	chrI	4926662	+	24	0.5646	72	50	CE28826 | CE33383 | F28B3.5 | F28B3.5a | F28B3.5b | WBGene00017886 | WP:CE28826 | WP:CE33383
UTGB	GTSSWA200267.01	outron	W03G9.8	W03G9.8	chrI	4958310	-	65	1.249	154	114	CE42695 | W03G9.8 | WBGene00044431 | WP:CE42695
UTGB	GTSSWA200268.01	outron	app-1	W03G9.4.1	chrI	4967374	-	18	0.7276	302	283	CE14560 | W03G9.4 | W03G9.4.1 | W03G9.4.2 | W03G9.4.3 | WBGene00000155 | WP:CE14560 | app-1
UTGB	GTSSWA200269.01	exon	W03G9.5	W03G9.5	chrI	4970290	-	48	0.6556	43	-1	CE14562 | W03G9.5 | WBGene00021016 | WP:CE14562
UTGB	GTSSWA200270.01	exon	F54C1.1	F54C1.1	chrI	5008773	+	35	0.7105	20	-1	CE11042 | F54C1.1 | WBGene00018789 | WP:CE11042
UTGB	GTSSWA200271.01	exon	pat-10	F54C1.7.1	chrI	5020081	-	10	0	17	-1	CE11052 | F54C1.7 | F54C1.7.1 | F54C1.7.10 | F54C1.7.2 | F54C1.7.3 | F54C1.7.4 | F54C1.7.5 | F54C1.7.6 | F54C1.7.7 | F54C1.7.8 | F54C1.7.9 | WBGene00003934 | WP:CE11052 | pat-10 | tnc-1
UTGB	GTSSWA200272.01	exon	C46H11.7	C46H11.7	chrI	5043066	-	55	0	10	-1	C46H11.7 | CE08789 | WBGene00016731 | WP:CE08789
UTGB	GTSSWA200273.01	exon	phat-1	C46H11.8	chrI	5045734	-	30	0	10	-1	C46H11.8 | CE34274 | WBGene00016732 | WP:CE34274 | phat-1
UTGB	GTSSWA200274.01	exon	phat-2	C46H11.9	chrI	5048018	-	16	1.555	24	-1	C46H11.9 | CE08791 | WBGene00016733 | WP:CE08791 | phat-2
UTGB	GTSSWA200275.01	outron	C46H11.2	C46H11.2	chrI	5050068	+	12	0	63	63	C46H11.2 | CE08784 | WBGene00016728 | WP:CE08784
UTGB	GTSSWA200276.02	outron	vha-16	C30F8.2.1	chrI	5082394	-	20	0	133	125	C30F8.2 | C30F8.2.1 | C30F8.2.2 | C30F8.2.3 | C30F8.2.4 | CE29684 | WBGene00016258 | WP:CE29684 | vha-16
UTGB	GTSSWA200277.01	exon	tag-300	Y110A7A.12	chrI	5103413	-	10	2.548	8	-1	CE23245 | WBGene00022461 | WP:CE23245 | Y110A7A.12 | tag-300
UTGB	GTSSWA200278.01	outron	chp-1	Y110A7A.13	chrI	5104959	-	30	1.758	44	44	CE23244 | WBGene00000502 | WP:CE23244 | Y110A7A.13 | chp | chp-1
UTGB	GTSSWA200279.02	outron	pas-3	Y110A7A.14.1	chrI	5106140	-	29	1.024	91	88	CE30307 | WBGene00003924 | WP:CE30307 | Y110A7A.14 | Y110A7A.14.1 | Y110A7A.14.2 | pas-3
UTGB	GTSSWA200280.01	exon	use-1	Y110A7A.11	chrI	5106255	+	34	11.71	41	-1	CE34394 | WBGene00022460 | WP:CE34394 | Y110A7A.11 | use-1
UTGB	GTSSWA200281.01	exon	Y110A7A.21	Y110A7A.21	chrI	5111371	-	14	2.787	234	-1	CE40664 | WBGene00045212 | WP:CE40664 | Y110A7A.21
UTGB	GTSSWA200282.01	outron	Y110A7A.15	Y110A7A.15a	chrI	5113874	-	19	4.037	132	118	CE30705 | CE33206 | WBGene00022462 | WP:CE30705 | WP:CE33206 | Y110A7A.15 | Y110A7A.15a | Y110A7A.15b
UTGB	GTSSWA200283.01	outron	elpc-1	Y110A7A.16	chrI	5118890	-	16	1.541	39	34	CE28103 | WBGene00022463 | WP:CE28103 | Y110A7A.16 | elpc-1
UTGB	GTSSWA200284.01	outron	Y110A7A.6	Y110A7A.6b.1	chrI	5131512	+	39	1.545	13	11	CE29606 | CE38000 | WBGene00022456 | WP:CE29606 | WP:CE38000 | Y110A7A.6 | Y110A7A.6a | Y110A7A.6a.1 | Y110A7A.6a.2 | Y110A7A.6a.3 | Y110A7A.6b | Y110A7A.6b.1 | Y110A7A.6b.2 | Y110A7A.6b.3
UTGB	GTSSWA200285.01	outron	Y110A7A.4	Y110A7A.4	chrI	5138158	+	31	16.37	115	106	CE24124 | WBGene00022455 | WP:CE24124 | Y110A7A.4
UTGB	GTSSWA200286.01	outron	ppw-2	Y110A7A.18	chrI	5162462	-	16	2.797	254	229	CE23239 | WBGene00004094 | WP:CE23239 | Y110A7A.18 | ppw-2
UTGB	GTSSWA200287.01	outron	Y110A7A.19	Y110A7A.19.1	chrI	5164949	-	19	0	76	61	CE23238 | WBGene00022464 | WP:CE23238 | Y110A7A.19 | Y110A7A.19.1 | Y110A7A.19.2
UTGB	GTSSWA200288.02	outron	hcp-6	Y110A7A.1b	chrI	5165103	+	19	0	57	52	CE24117 | CE28104 | WBGene00001833 | WP:CE24117 | WP:CE28104 | Y110A7A.1 | Y110A7A.1a | Y110A7A.1b | hcp-6
UTGB	GTSSWA200289.01	outron	spd-5	F56A3.4	chrI	5176104	-	112	0	579	564	CE28834 | F56A3.4 | WBGene00004955 | WP:CE28834 | spd-5
UTGB	GTSSWA200290.01	exon	B0261.4	B0261.4a	chrI	5244354	+	14	0	42	-1	B0261.4 | B0261.4a | B0261.4b | CE39547 | CE39548 | WBGene00015092 | WP:CE39547 | WP:CE39548
UTGB	GTSSWA200291.02	exon	B0261.6	B0261.6a	chrI	5256926	-	50	0.466	25	-1	B0261.6 | B0261.6a | B0261.6b | CE29532 | CE39549 | WBGene00015094 | WP:CE29532 | WP:CE39549
UTGB	GTSSWA200292.01	outron	B0261.1	B0261.1	chrI	5263027	+	21	15.74	684	670	B0261.1 | CE29531 | WBGene00015091 | WP:CE29531
UTGB	GTSSWA200293.02	outron	B0261.7	B0261.7	chrI	5271092	-	12	0	154	149	B0261.7 | CE07709 | WBGene00015095 | WP:CE07709
UTGB	GTSSWA200294.11	exon	C01G8.1	C01G8.1b	chrI	5274248	-	882	0.8946	36	-1	C01G8.1 | C01G8.1a | C01G8.1b | CE07801 | CE41975 | WBGene00015312 | WP:CE07801 | WP:CE41975
UTGB	GTSSWA200295.01	outron	C01G8.6	C01G8.6	chrI	5300516	-	31	2.923	206	181	C01G8.6 | CE07807 | WBGene00015313 | WP:CE07807
UTGB	GTSSWA200296.01	outron	F48C1.4	F48C1.4	chrI	5316575	-	11	0	2848	2647	CE10738 | F48C1.4 | WBGene00018597 | WP:CE10738
UTGB	GTSSWA200297.03	outron	F48C1.6	F48C1.6	chrI	5319290	-	61	0	15	13	CE10742 | F48C1.6 | WBGene00018599 | WP:CE10742
UTGB	GTSSWA200298.01	exon	spe-11	F48C1.7	chrI	5332183	-	20	0.7387	22	-1	CE10744 | F48C1.7 | WBGene00004965 | WP:CE10744 | spe-11
UTGB	GTSSWA200299.06	exon	F48C1.9.1	F48C1.9.1	chrI	5332783	-	1438	0.3803	19	-1	CE31350 | F48C1.9 | F48C1.9.1 | F48C1.9.2 | WBGene00018601 | WP:CE31350
UTGB	GTSSWA200300.02	outron	F55A12.5	F55A12.5	chrI	5344530	+	63	0.604	1401	1400	CE11125 | F55A12.5 | WBGene00018864 | WP:CE11125
UTGB	GTSSWA200301.01	outron	F55A12.10	F55A12.10	chrI	5370633	-	11	0	2813	2800	CE28451 | F55A12.10 | F55A12.10.1 | F55A12.10.2 | WBGene00018867 | WP:CE28451
UTGB	GTSSWA200302.05	outron	F55A12.1	F55A12.1	chrI	5368301	+	35	0.6573	180	156	CE11117 | F55A12.1 | WBGene00018862 | WP:CE11117
UTGB	GTSSWA200303.02	outron	pqn-44	F55A12.9d.4	chrI	5377458	-	53	0.9914	1137	1113	CE08345 | CE26925 | CE30809 | CE33399 | F55A12.9 | F55A12.9a | F55A12.9b | F55A12.9c | F55A12.9d | F55A12.9d.1 | F55A12.9d.2 | F55A12.9d.3 | F55A12.9d.4 | F55A12.9d.5 | WBGene00004131 | WP:CE08345 | WP:CE26925 | WP:CE30809 | WP:CE33399 | pqn-44
UTGB	GTSSWA200304.01	exon	C24A11.5	C24A11.5	chrI	5388595	-	21	0	2854	-1	C24A11.5 | CE08346 | WBGene00016042 | WP:CE08346
UTGB	GTSSWA200305.02	exon	C24A11.1	C24A11.1	chrI	5401811	+	53	0.5802	51	-1	C24A11.1 | CE20521 | WBGene00016040 | WP:CE20521
UTGB	GTSSWA200306.01	outron	coq-1	C24A11.9	chrI	5417093	-	33	14.44	1554	1460	C24A11.9 | CE29183 | WBGene00000761 | WP:CE29183 | coq-1 | tag-134
UTGB	GTSSWA200307.01	exon	F27C1.3	F27C1.3	chrI	5426309	+	24	0.6006	58	-1	CE28825 | F27C1.3 | WBGene00017853 | WP:CE28825
UTGB	GTSSWA200308.04	exon	atp-3	F27C1.7b	chrI	5429841	-	100	1.564	31	-1	CE09719 | CE36139 | F27C1.7 | F27C1.7a | F27C1.7a.1 | F27C1.7a.2 | F27C1.7a.3 | F27C1.7a.4 | F27C1.7a.5 | F27C1.7b | WBGene00000230 | WP:CE09719 | WP:CE36139 | atp-3
UTGB	GTSSWA200309.06	outron	F27C1.2	F27C1.2b	chrI	5430084	+	262	0.7387	86	83	CE09715 | CE36932 | F27C1.2 | F27C1.2a | F27C1.2b | F27C1.2b.1 | F27C1.2b.2 | WBGene00017852 | WP:CE09715 | WP:CE36932
UTGB	GTSSWA200310.01	outron	dpy-5	F27C1.8.1	chrI	5433145	-	43	2.089	90	87	CE09720 | F27C1.8 | F27C1.8.1 | F27C1.8.2 | WBGene00001067 | WP:CE09720 | dpy-5
UTGB	GTSSWA200311.01	exon	F27C1.1	F27C1.1	chrI	5434810	+	595	1.19	47	-1	CE09714 | F27C1.1 | WBGene00017851 | WP:CE09714
UTGB	GTSSWA200312.02	outron	rpl-19	C09D4.5.2	chrI	5485952	-	173	0.7902	236	206	C09D4.5 | C09D4.5.1 | C09D4.5.2 | C09D4.5.3 | C09D4.5.4 | CE08034 | WBGene00004431 | WP:CE08034 | rpl-19
UTGB	GTSSWA200313.02	exon	C09D4.1	C09D4.1a	chrI	5497835	+	90	0	85	-1	C09D4.1 | C09D4.1a | C09D4.1b | C09D4.1b.1 | C09D4.1b.2 | CE27671 | CE37705 | WBGene00015632 | WP:CE27671 | WP:CE37705
UTGB	GTSSWA200314.01	outron	F59A3.4	F59A3.4	chrI	5509291	-	35	14.48	118	117	CE11422 | F59A3.4 | WBGene00019077 | WP:CE11422
UTGB	GTSSWA200315.01	exon	F59A3.8	F59A3.8	chrI	5525343	-	44	0.4795	66	-1	CE30549 | F59A3.8 | WBGene00019081 | WP:CE30549
UTGB	GTSSWA200316.01	outron	pup-3	F59A3.9	chrI	5533816	-	20	0.6006	102	100	CE11432 | F59A3.9 | WBGene00019082 | WP:CE11432 | pup-3
UTGB	GTSSWA200317.01	outron	ostd-1	M01A10.3.1	chrI	5550548	-	11	3.633	254	249	CE12232 | M01A10.3 | M01A10.3.1 | M01A10.3.2 | WBGene00019693 | WP:CE12232 | ostd-1
UTGB	GTSSWA200318.01	outron	M01A10.1	M01A10.1	chrI	5563858	+	91	2.543	60	45	CE41683 | M01A10.1 | WBGene00019692 | WP:CE41683
UTGB	GTSSWA200319.01	outron	pqn-52	M01E11.4c	chrI	5571954	-	25	0.6267	1873	1871	CE28610 | CE28611 | CE37032 | M01E11.4 | M01E11.4a | M01E11.4a.1 | M01E11.4a.2 | M01E11.4b | M01E11.4b.1 | M01E11.4b.2 | M01E11.4c | WBGene00019713 | WP:CE28610 | WP:CE28611 | WP:CE37032 | pqn-52
UTGB	GTSSWA200320.02	outron	cey-3	M01E11.5.1	chrI	5572980	-	210	0.3912	59	27	CE12296 | M01E11.5 | M01E11.5.1 | M01E11.5.2 | M01E11.5.3 | WBGene00000474 | WP:CE12296 | cey-3
UTGB	GTSSWA200321.01	outron	M01E11.3	M01E11.3	chrI	5573141	+	13	2.332	105	76	CE12292 | M01E11.3 | WBGene00019712 | WP:CE12292
UTGB	GTSSWA200323.01	outron	F46F11.11	F46F11.11	chrI	5607622	-	10	0	101	91	CE38711 | F46F11.11 | WBGene00044422 | WP:CE38711
UTGB	GTSSWA200324.01	outron	F46F11.6	F46F11.6	chrI	5620035	-	175	0	1618	1480	CE30535 | F46F11.6 | WBGene00018509 | WP:CE30535
UTGB	GTSSWA200326.01	exon	F46F11.7	F46F11.7	chrI	5620520	+	16	1.555	271	-1	CE39101 | F46F11.7 | WBGene00018510 | WP:CE39101
UTGB	GTSSWA200327.03	exon	F46F11.8	F46F11.8	chrI	5626114	-	74	1.544	36	-1	CE26921 | F46F11.8 | WBGene00018511 | WP:CE26921
UTGB	GTSSWA200328.01	exon	F55F8.7	F55F8.7	chrI	5661264	-	33	0	48	-1	CE44981 | F55F8.7 | WBGene00018895 | WP:CE44981
UTGB	GTSSWA200329.01	outron	F55F8.9	F55F8.9	chrI	5675093	-	23	0	1745	1737	CE44985 | CE45001 | F55F8.9 | F55F8.9a | F55F8.9a.1 | F55F8.9a.2 | F55F8.9b | WBGene00018897 | WP:CE44985 | WP:CE45001
UTGB	GTSSWA200330.02	outron	T19B4.5	T19B4.5	chrI	5673849	+	20	0	563	460	CE13744 | T19B4.5 | WBGene00020558 | WP:CE13744
UTGB	GTSSWA200331.01	outron	dnj-21	T19B4.4	chrI	5676425	+	15	3.999	414	405	CE13742 | T19B4.4 | WBGene00001039 | WP:CE13742 | dnj-21
UTGB	GTSSWA200332.01	outron	unc-40	T19B4.7	chrI	5694150	-	83	0	2706	2643	CE25115 | T19B4.7 | T19B4.7.1 | T19B4.7.2 | WBGene00006776 | WP:CE25115 | madd-1 | unc-40 | unc-91
UTGB	GTSSWA200333.01	exon	lim-7	C04F1.3	chrI	5716591	+	16	1.298	88	-1	C04F1.3 | CE17366 | WBGene00002989 | WP:CE17366 | lim-7
UTGB	GTSSWA200334.01	exon	nhr-266	F56H1.2	chrI	5735532	+	44	0	706	-1	CE17913 | F56H1.2 | WBGene00018993 | WP:CE17913 | nhr-266
UTGB	GTSSWA200335.02	outron	rpt-5	F56H1.4.1	chrI	5744022	-	131	1.797	464	447	CE17915 | F56H1.4 | F56H1.4.1 | F56H1.4.2 | WBGene00004505 | WP:CE17915 | rpt-5
UTGB	GTSSWA200336.01	outron	F56H1.6	F56H1.6	chrI	5744151	+	21	1.419	36	32	CE38609 | F56H1.6 | WBGene00044305 | WP:CE38609
UTGB	GTSSWA200337.01	exon	che-14	F56H1.1	chrI	5746640	+	15	0	88	-1	CE28468 | F56H1.1 | WBGene00000493 | WP:CE28468 | che-14 | ptd-1
UTGB	GTSSWA200338.01	exon	F56H1.7	F56H1.7	chrI	5762422	-	33	10.26	51	-1	CE41412 | F56H1.7 | WBGene00045483 | WP:CE41412
UTGB	GTSSWA200339.04	exon	T22E7.1	T22E7.1a	chrI	5768997	+	121	0	26	-1	CE31368 | CE33189 | T22E7.1 | T22E7.1a | T22E7.1b | WBGene00020693 | WP:CE31368 | WP:CE33189
UTGB	GTSSWA200340.01	exon	hil-5	B0414.3	chrI	5774588	+	1008	1.16	36	-1	B0414.3 | CE07733 | WBGene00001856 | WP:CE07733 | hil-5
UTGB	GTSSWA200341.04	outron	cpb-3	B0414.5	chrI	5791940	-	28	0	213	184	B0414.5 | CE41548 | WBGene00000772 | WP:CE41548 | cpb-3
UTGB	GTSSWA200342.01	outron	vps-51	B0414.8b	chrI	5807294	-	65	0.4415	49	36	B0414.8 | B0414.8a | B0414.8b | CE30413 | CE36910 | WBGene00015176 | WP:CE30413 | WP:CE36910 | vps-51
UTGB	GTSSWA200343.01	outron	lin-35	C32F10.2	chrI	5807609	+	13	3.44	124	103	C32F10.2 | CE24823 | WBGene00003020 | WP:CE24823 | lin-35
UTGB	GTSSWA200344.02	outron	hmg-3	C32F10.5	chrI	5818208	-	27	0	79	78	C32F10.5 | CE08542 | WBGene00001973 | WP:CE08542 | hmg-3
UTGB	GTSSWA200345.01	outron	C32F10.8	C32F10.8b.1	chrI	5826163	-	33	2.493	1086	1085	C32F10.8 | C32F10.8a | C32F10.8a.1 | C32F10.8a.2 | C32F10.8b | C32F10.8b.1 | C32F10.8b.2 | C32F10.8b.3 | C32F10.8b.4 | C32F10.8b.5 | CE32815 | CE33563 | WBGene00016333 | WP:CE32815 | WP:CE33563
UTGB	GTSSWA200346.01	outron	obr-4	C32F10.1a	chrI	5827988	+	16	6.652	1415	1406	C32F10.1 | C32F10.1a | C32F10.1a.1 | C32F10.1a.2 | C32F10.1b | CE08539 | CE32814 | WBGene00016331 | WP:CE08539 | WP:CE32814 | obr-4
UTGB	GTSSWA200347.01	exon	F33D11.7	F33D11.7	chrI	5851907	-	62	0	75	-1	CE09897 | F33D11.7 | WBGene00018004 | WP:CE09897
UTGB	GTSSWA200348.01	outron	F33D11.12	F33D11.12	chrI	5866004	-	15	0	1333	958	CE28292 | F33D11.12 | F33D11.12.1 | F33D11.12.2 | F33D11.12.3 | WBGene00018009 | WP:CE28292
UTGB	GTSSWA200349.01	outron	F33D11.10	F33D11.10.1	chrI	5868735	-	11	2.28	602	592	CE09901 | F33D11.10 | F33D11.10.1 | F33D11.10.2 | WBGene00018007 | WP:CE09901
UTGB	GTSSWA200350.02	outron	vpr-1	F33D11.11	chrI	5871964	-	11	0	2013	2006	CE09902 | F33D11.11 | F33D11.11.1 | F33D11.11.2 | WBGene00018008 | WP:CE09902 | vpr-1
UTGB	GTSSWA200351.01	outron	C34G6.5	C34G6.5	chrI	5872062	+	13	0	126	115	C34G6.5 | CE26909 | WBGene00016421 | WP:CE26909
UTGB	GTSSWA200352.01	outron	stam-1	C34G6.7b.1	chrI	5904718	-	28	0	405	387	C34G6.7 | C34G6.7a | C34G6.7b | C34G6.7b.1 | C34G6.7b.2 | C34G6.7b.3 | CE29700 | CE32816 | WBGene00004109 | WP:CE29700 | WP:CE32816 | pqn-19 | stam-1
UTGB	GTSSWA200353.02	outron	air-2	B0207.4	chrI	5937223	+	24	8.346	263	256	B0207.4 | CE24761 | WBGene00000099 | WP:CE24761 | air-2 | cyk-6 | let-603 | stu-7
UTGB	GTSSWA200354.01	outron	C06A5.6	C06A5.6	chrI	5986045	-	650	12.96	183	173	C06A5.6 | C06A5.6.1 | C06A5.6.2 | CE07953 | WBGene00015504 | WP:CE07953
UTGB	GTSSWA200355.02	outron	C06A5.3	C06A5.3a	chrI	5986453	+	18	0.8493	49	41	C06A5.3 | C06A5.3a | C06A5.3a.1 | C06A5.3a.2 | C06A5.3b | CE37699 | CE37700 | WBGene00015501 | WP:CE37699 | WP:CE37700
UTGB	GTSSWA200356.01	exon	C06A5.2	C06A5.2	chrI	6006335	+	12	0	34	-1	C06A5.2 | CE07949 | WBGene00015500 | WP:CE07949
UTGB	GTSSWA200357.01	outron	rnf-1	C06A5.9	chrI	6011560	-	14	1.064	87	60	C06A5.9 | CE34249 | WBGene00004380 | WP:CE34249 | rnf-1 | tag-54
UTGB	GTSSWA200358.01	outron	C06A5.1	C06A5.1	chrI	6011985	+	57	14.56	75	62	C06A5.1 | CE07948 | WBGene00015499 | WP:CE07948
UTGB	GTSSWA200359.01	outron	csn-2	B0025.2.1	chrI	6022256	+	27	1.365	429	413	B0025.2 | B0025.2.1 | B0025.2.2 | B0025.2.3 | B0025.2.4 | CE27562 | WBGene00000814 | WP:CE27562 | csn-2
UTGB	GTSSWA200360.03	outron	ari-1	C27A12.8.1	chrI	6061286	-	28	0	331	330	C27A12.8 | C27A12.8.1 | C27A12.8.2 | CE29680 | WBGene00016158 | WP:CE29680 | ari-1
UTGB	GTSSWA200361.01	outron	haf-9	ZK484.2a.1	chrI	6081397	+	22	0	421	417	CE27353 | CE33261 | WBGene00001819 | WP:CE27353 | WP:CE33261 | ZK484.2 | ZK484.2a | ZK484.2a.1 | ZK484.2a.2 | ZK484.2b | haf-9
UTGB	GTSSWA200362.01	exon	ZK484.5	ZK484.5	chrI	6087759	-	3440	1.514	27	-1	CE15345 | WBGene00022751 | WP:CE15345 | ZK484.5
UTGB	GTSSWA200363.01	exon	ZK484.6	ZK484.6	chrI	6090897	-	18	0	37	-1	CE34458 | WBGene00022752 | WP:CE34458 | ZK484.6
UTGB	GTSSWA200364.02	outron	ZK484.1	ZK484.1b.1	chrI	6091199	+	57	0.536	2149	2111	CE41745 | CE41746 | WBGene00022748 | WP:CE41745 | WP:CE41746 | ZK484.1 | ZK484.1a | ZK484.1b | ZK484.1b.1 | ZK484.1b.2 | ZK484.1b.3 | ZK484.1b.4 | ZK484.1b.5 | ZK484.1b.6 | ZK484.1b.7
UTGB	GTSSWA200365.02	exon	ZK484.7	ZK484.7	chrI	6096591	-	238	0.4874	72	-1	CE15349 | WBGene00022753 | WP:CE15349 | ZK484.7
UTGB	GTSSWA200366.01	exon	nspd-1	ZK484.8	chrI	6097839	-	1483	0.5221	45	-1	CE15351 | WBGene00022754 | WP:CE15351 | ZK484.8 | nspd-1
UTGB	GTSSWA200367.01	exon	T27A3.4	T27A3.4	chrI	6098958	+	139	0.3878	52	-1	CE14223 | T27A3.4 | WBGene00020840 | WP:CE14223
UTGB	GTSSWA200368.02	exon	T27A3.5	T27A3.5	chrI	6101751	-	168	0.5014	67	-1	CE40312 | T27A3.5 | WBGene00020841 | WP:CE40312
UTGB	GTSSWA200369.01	outron	T27A3.6	T27A3.6	chrI	6107991	-	49	9.748	273	273	CE14227 | T27A3.6 | WBGene00020842 | WP:CE14227
UTGB	GTSSWA200370.01	exon	F56F4.8	F56F4.8	chrI	6149238	+	26	0	62	-1	CE41411 | F56F4.8 | WBGene00045498 | WP:CE41411
UTGB	GTSSWA200371.01	exon	T09B4.7	T09B4.7	chrI	6163240	-	11	2.104	1572	-1	CE13469 | T09B4.7 | WBGene00020381 | WP:CE13469
UTGB	GTSSWA200372.01	exon	T09B4.3	T09B4.3	chrI	6176328	+	27	2.273	54	-1	CE13461 | T09B4.3 | WBGene00020377 | WP:CE13461
UTGB	GTSSWA200373.01	outron	T09B4.9	T09B4.9	chrI	6181533	-	37	1.531	690	690	CE13473 | T09B4.9 | WBGene00020383 | WP:CE13473
UTGB	GTSSWA200374.01	outron	T09B4.2	T09B4.2	chrI	6184067	+	13	2.17	22	14	CE13459 | T09B4.2 | T09B4.2.1 | T09B4.2.2 | WBGene00020376 | WP:CE13459
UTGB	GTSSWA200375.01	outron	fars-1	T08B2.9a	chrI	6215500	-	31	1.33	922	911	CE13435 | CE33173 | T08B2.9 | T08B2.9a | T08B2.9b | T08B2.9b.1 | T08B2.9b.2 | T08B2.9b.3 | T08B2.9b.4 | WBGene00001497 | WP:CE13435 | WP:CE33173 | fars-1 | frs-1
UTGB	GTSSWA200376.01	outron	T08B2.5	T08B2.5c	chrI	6215647	+	29	1.779	465	274	CE13429 | CE25984 | CE26949 | CE30298 | CE33171 | CE33172 | CE38728 | T08B2.5 | T08B2.5a | T08B2.5b | T08B2.5c | T08B2.5d | T08B2.5e | T08B2.5f | T08B2.5g | WBGene00020346 | WP:CE13429 | WP:CE25984 | WP:CE26949 | WP:CE30298 | WP:CE33171 | WP:CE33172 | WP:CE38728
UTGB	GTSSWA200377.01	outron	rps-17	T08B2.10.2	chrI	6220946	-	53	1.916	193	179	CE26948 | T08B2.10 | T08B2.10.1 | T08B2.10.2 | WBGene00004486 | WP:CE26948 | rps-17
UTGB	GTSSWA200378.01	outron	T08B2.4	T08B2.4	chrI	6224882	+	10	0	678	482	CE13425 | T08B2.4 | WBGene00020345 | WP:CE13425
UTGB	GTSSWA200379.08	exon	spp-15	C48E7.10	chrI	6250069	-	802	0.6083	24	-1	C48E7.10 | CE26915 | WBGene00005000 | WP:CE26915 | spp-15
UTGB	GTSSWA200380.04	outron	C48E7.11	C48E7.11	chrI	6253044	+	153	1.421	42	40	C48E7.11 | CE32167 | WBGene00016754 | WP:CE32167
UTGB	GTSSWA200381.01	exon	C10G11.9	C10G11.9	chrI	6275293	-	195	1.864	51	-1	C10G11.9 | CE08088 | WBGene00015689 | WP:CE08088
UTGB	GTSSWA200382.01	outron	C10G11.7	C10G11.7.1	chrI	6283591	+	39	0.6513	1419	1390	C10G11.7 | C10G11.7.1 | C10G11.7.2 | C10G11.7.3 | C10G11.7.4 | CE08086 | WBGene00015687 | WP:CE08086
UTGB	GTSSWA200383.01	exon	C10G11.6	C10G11.6	chrI	6287624	+	11	6.504	2384	-1	C10G11.6 | C10G11.6.1 | C10G11.6.2 | CE43984 | WBGene00015686 | WP:CE43984
UTGB	GTSSWA200384.01	outron	pnk-1	C10G11.5a	chrI	6294876	+	32	0	205	195	C10G11.5 | C10G11.5a | C10G11.5b | C10G11.5b.1 | C10G11.5b.2 | C10G11.5c | C10G11.5c.1 | C10G11.5c.2 | C10G11.5c.3 | CE29080 | CE30488 | CE33269 | WBGene00004068 | WP:CE29080 | WP:CE30488 | WP:CE33269 | pnk-1
UTGB	GTSSWA200385.01	exon	col-58	F26B1.4	chrI	6311253	+	132	1.18	27	-1	CE25863 | F26B1.4 | WBGene00000634 | WP:CE25863 | col-58
UTGB	GTSSWA200386.01	outron	F26B1.2	F26B1.2a	chrI	6317434	+	68	1.313	285	269	CE09674 | CE33057 | CE33058 | CE33059 | CE33060 | F26B1.2 | F26B1.2a | F26B1.2a.1 | F26B1.2a.2 | F26B1.2b | F26B1.2c | F26B1.2c.1 | F26B1.2c.2 | F26B1.2c.3 | F26B1.2d | F26B1.2e | WBGene00017816 | WP:CE09674 | WP:CE33057 | WP:CE33058 | WP:CE33059 | WP:CE33060
UTGB	GTSSWA200387.01	exon	K04F10.3	K04F10.3a	chrI	6358653	+	49	0.468	24	-1	CE40814 | CE42009 | K04F10.3 | K04F10.3a | K04F10.3b | WBGene00019396 | WP:CE40814 | WP:CE42009
UTGB	GTSSWA200388.01	exon	K04F10.1	K04F10.1	chrI	6365021	+	17	3.122	50	-1	CE41579 | K04F10.1 | WBGene00019394 | WP:CE41579
UTGB	GTSSWA200389.02	exon	K04F10.7	K04F10.7	chrI	6366383	+	179	7.96	97	-1	CE18015 | K04F10.7 | WBGene00019399 | WP:CE18015
UTGB	GTSSWA200390.01	exon	ZC308.4	ZC308.4b	chrI	6368273	+	746	9.718	35	-1	CE15165 | CE41742 | WBGene00022586 | WP:CE15165 | WP:CE41742 | ZC308.4 | ZC308.4a | ZC308.4b
UTGB	GTSSWA200392.01	outron	san-1	ZC328.4	chrI	6407460	+	13	0	76	74	CE34445 | WBGene00004721 | WP:CE34445 | ZC328.4 | mdf-3 | san-1
UTGB	GTSSWA200393.02	exon	ZC328.3	ZC328.3a	chrI	6416830	-	19	2.831	201	-1	CE34444 | CE39657 | WBGene00022593 | WP:CE34444 | WP:CE39657 | ZC328.3 | ZC328.3a | ZC328.3b
UTGB	GTSSWA200394.01	exon	rbx-2	R10A10.2	chrI	6421932	-	58	0.9033	80	-1	CE12670 | R10A10.2 | WBGene00019993 | WP:CE12670 | rbx-2
UTGB	GTSSWA200395.03	exon	ncbp-1	F37E3.1	chrI	6422021	+	383	2.126	87	-1	CE29793 | F37E3.1 | WBGene00018156 | WP:CE29793 | ncbp-1
UTGB	GTSSWA200396.01	exon	F37E3.3	F37E3.3	chrI	6431587	-	16	0	59	-1	CE09999 | F37E3.3 | WBGene00018158 | WP:CE09999
UTGB	GTSSWA200397.02	outron	snt-4	T23H2.2	chrI	6436098	+	103	1.685	55	29	CE30456 | T23H2.2 | WBGene00004924 | WP:CE30456 | snt-4
UTGB	GTSSWA200398.01	exon	knl-2	K06A5.4	chrI	6460948	+	65	0.9162	45	-1	CE26645 | K06A5.4 | WBGene00019432 | WP:CE26645 | knl-2
UTGB	GTSSWA200399.01	exon	K06A5.3	K06A5.3	chrI	6466829	+	62	0.4456	23	-1	CE11772 | K06A5.3 | WBGene00019431 | WP:CE11772
UTGB	GTSSWA200400.02	exon	K06A5.2	K06A5.2	chrI	6468131	+	515	0.9396	53	-1	CE11770 | K06A5.2 | WBGene00019430 | WP:CE11770
UTGB	GTSSWA200401.01	outron	cdc-25.1	K06A5.7.1	chrI	6472536	-	51	0.928	631	611	CE11778 | K06A5.7 | K06A5.7.1 | K06A5.7.2 | WBGene00000386 | WP:CE11778 | cdc-25.1 | lin-60
UTGB	GTSSWA200402.01	outron	mdt-18	C55B7.9.1	chrI	6493890	-	25	12.59	56	40	C55B7.9 | C55B7.9.1 | C55B7.9.2 | CE09020 | WBGene00007018 | WP:CE09020 | mdt-18
UTGB	GTSSWA200403.01	outron	uri-1	C55B7.5	chrI	6494203	+	11	4.581	128	89	C55B7.5 | C55B7.5.1 | C55B7.5.2 | CE09016 | WBGene00016944 | WP:CE09016 | uri-1
UTGB	GTSSWA200404.03	exon	acdh-1	C55B7.4a	chrI	6497440	+	19377	0.5977	15	-1	C55B7.4 | C55B7.4a | C55B7.4b | C55B7.4b.1 | C55B7.4b.2 | C55B7.4b.3 | C55B7.4b.4 | C55B7.4b.5 | C55B7.4b.6 | CE09015 | CE32840 | WBGene00016943 | WP:CE09015 | WP:CE32840 | acdh-1 | dod-12
UTGB	GTSSWA200405.02	outron	C55B7.3	C55B7.3	chrI	6499973	+	22	0	59	58	C55B7.3 | CE09014 | WBGene00016942 | WP:CE09014
UTGB	GTSSWA200406.01	outron	C55B7.11	C55B7.11	chrI	6513843	-	20	0	193	191	C55B7.11 | CE41882 | WBGene00016947 | WP:CE41882
UTGB	GTSSWA200407.04	exon	C55B7.1.1	C55B7.1.1	chrI	6513964	+	792	3.027	58	-1	C55B7.1 | C55B7.1.1 | C55B7.1.2 | CE09012 | WBGene00001599 | WP:CE09012 | glh-2
UTGB	GTSSWA200408.01	exon	T10E9.4	T10E9.4.1	chrI	6525046	+	275	0.5447	663	-1	CE39771 | T10E9.4 | T10E9.4.1 | T10E9.4.2 | WBGene00020414 | WP:CE39771
UTGB	GTSSWA200409.01	exon	T10E9.6	T10E9.6	chrI	6530097	-	23	3.858	41	-1	CE13553 | T10E9.6 | WBGene00020416 | WP:CE13553
UTGB	GTSSWA200410.01	outron	nuo-2	T10E9.7a	chrI	6533032	-	31	7.064	63	53	CE33179 | CE37406 | T10E9.7 | T10E9.7a | T10E9.7b | T10E9.7b.1 | T10E9.7b.2 | WBGene00020417 | WP:CE33179 | WP:CE37406 | nduf-3 | nuo-2
UTGB	GTSSWA200411.04	exon	T10E9.3	T10E9.3	chrI	6534102	+	63	0.864	16	-1	CE30171 | T10E9.3 | WBGene00020413 | WP:CE30171
UTGB	GTSSWA200412.02	exon	T10E9.2	T10E9.2	chrI	6542143	+	487	5.204	26	-1	CE13545 | T10E9.2 | WBGene00020412 | WP:CE13545
UTGB	GTSSWA200413.01	outron	acdh-4	T10E9.9	chrI	6548657	-	55	1.051	272	80	CE34367 | T10E9.9 | WBGene00020419 | WP:CE34367 | acdh-4
UTGB	GTSSWA200414.01	outron	F57B10.8	F57B10.8	chrI	6550510	-	15	3.738	158	111	CE11312 | F57B10.8 | WBGene00019005 | WP:CE11312
UTGB	GTSSWA200415.01	exon	tre-1	F57B10.7	chrI	6554737	+	162	11.81	165	-1	CE30545 | F57B10.7 | WBGene00006607 | WP:CE30545 | tag-36 | tre-1 | tre1
UTGB	GTSSWA200416.02	outron	xpg-1	F57B10.6	chrI	6558362	+	12	5.637	339	337	CE11308 | F57B10.6 | WBGene00019004 | WP:CE11308 | xpg-1
UTGB	GTSSWA200417.01	outron	F57B10.5	F57B10.5	chrI	6562565	+	18	0	143	135	CE11306 | F57B10.5 | F57B10.5.1 | F57B10.5.2 | WBGene00019003 | WP:CE11306
UTGB	GTSSWA200418.01	outron	bag-1	F57B10.11	chrI	6564552	-	12	0	101	99	CE11318 | F57B10.11 | WBGene00000236 | WP:CE11318 | bag-1
UTGB	GTSSWA200419.01	exon	F57B10.3	F57B10.3a	chrI	6569514	+	53	1.028	96	-1	CE11302 | CE33113 | F57B10.3 | F57B10.3a | F57B10.3b | F57B10.3b.1 | F57B10.3b.2 | F57B10.3b.3 | F57B10.3b.4 | WBGene00019001 | WP:CE11302 | WP:CE33113
UTGB	GTSSWA200420.01	outron	let-607	F57B10.1.1	chrI	6580048	+	49	9.852	191	139	CE37244 | F57B10.1 | F57B10.1.1 | F57B10.1.2 | F57B10.1.3 | WBGene00002783 | WP:CE37244 | let-607
UTGB	GTSSWA200421.01	exon	try-6	F48A9.3	chrI	6585283	+	52	0	22	-1	CE41905 | F48A9.3 | WBGene00006624 | WP:CE41905 | try-6
UTGB	GTSSWA200422.01	exon	F48A9.1	F48A9.1	chrI	6594322	+	27	2.653	120	-1	CE10716 | F48A9.1 | WBGene00018581 | WP:CE10716
UTGB	GTSSWA200423.01	exon	D2092.4	D2092.4	chrI	6615954	-	501	5.302	69	-1	CE30438 | D2092.4 | WBGene00017065 | WP:CE30438
UTGB	GTSSWA200424.01	exon	tsp-19	D2092.7	chrI	6616290	+	17	0	15	-1	CE40198 | D2092.7 | WBGene00006645 | WP:CE40198 | tsp-19
UTGB	GTSSWA200425.01	exon	D2092.8	D2092.8	chrI	6620666	+	11	0	77	-1	CE09107 | D2092.8 | WBGene00017068 | WP:CE09107
UTGB	GTSSWA200426.01	outron	ppfr-2	D2092.2.1	chrI	6626881	-	12	4.442	99	91	CE09101 | D2092.2 | D2092.2.1 | D2092.2.2 | WBGene00017064 | WP:CE09101 | ppfr-2
UTGB	GTSSWA200427.01	exon	D2092.10	D2092.10	chrI	6629733	-	12	1.45	1817	-1	CE39009 | D2092.10 | WBGene00044610 | WP:CE39009
UTGB	GTSSWA200428.01	exon	ZC581.7	ZC581.7	chrI	6662315	-	10	0	26	-1	CE28168 | WBGene00022634 | WP:CE28168 | ZC581.7
UTGB	GTSSWA200429.01	exon	C17F3.3	C17F3.3	chrI	6682292	+	64	0	77	-1	C17F3.3 | CE44937 | WBGene00015908 | WP:CE44937
UTGB	GTSSWA200430.01	exon	T23B3.5	T23B3.5	chrI	6706421	-	177	0.4097	61	-1	CE14016 | T23B3.5 | WBGene00020713 | WP:CE14016
UTGB	GTSSWA200431.01	exon	T23B3.6	T23B3.6	chrI	6708662	-	13	0	31	-1	CE30693 | T23B3.6 | WBGene00020714 | WP:CE30693
UTGB	GTSSWA200432.02	outron	T23B3.1	T23B3.1	chrI	6717718	+	36	0	112	104	CE14008 | CE41700 | T23B3.1 | T23B3.1b | WBGene00020709 | WP:CE14008 | WP:CE41700
UTGB	GTSSWA200433.01	outron	smg-5	W02D3.8	chrI	6736225	-	17	0	71	62	CE25134 | W02D3.8 | WBGene00004883 | WP:CE25134 | mab-15 | smg-5
UTGB	GTSSWA200434.01	exon	dhod-1	W02D3.2	chrI	6737524	+	22	0	10	-1	CE14420 | W02D3.2 | W02D3.2.1 | W02D3.2.2 | WBGene00020932 | WP:CE14420 | dhod-1
UTGB	GTSSWA200435.01	outron	hrpf-1	W02D3.11b	chrI	6756504	-	12	0.8493	156	154	CE26020 | CE31078 | W02D3.11 | W02D3.11a | W02D3.11b | W02D3.11b.1 | W02D3.11b.2 | WBGene00020936 | WP:CE26020 | WP:CE31078 | hrpf-1
UTGB	GTSSWA200436.01	outron	F08B6.1	F08B6.1	chrI	6760391	+	25	0	42	26	CE39717 | F08B6.1 | WBGene00017239 | WP:CE39717
UTGB	GTSSWA200437.03	exon	acdh-5	C37A2.3	chrI	6784856	+	66	1.416	53	-1	C37A2.3 | CE08612 | WBGene00016491 | WP:CE08612 | acdh-5
UTGB	GTSSWA200438.02	outron	C37A2.7	C37A2.7.1	chrI	6790054	-	46	2.14	316	314	C37A2.7 | C37A2.7.1 | C37A2.7.2 | CE30433 | WBGene00016493 | WP:CE30433
UTGB	GTSSWA200439.01	outron	pqn-20	C37A2.2	chrI	6790544	+	11	0	482	447	C37A2.2 | CE40193 | WBGene00004110 | WP:CE40193 | pqn-20
UTGB	GTSSWA200440.01	exon	C37A2.8	C37A2.8b	chrI	6799621	-	230	15.25	42	-1	C37A2.8 | C37A2.8a | C37A2.8b | CE08617 | CE29218 | WBGene00016494 | WP:CE08617 | WP:CE29218
UTGB	GTSSWA200441.05	outron	E02D9.1	E02D9.1c	chrI	6799750	+	99	0.8623	675	637	CE08610 | CE27902 | CE31335 | CE31336 | E02D9.1 | E02D9.1a | E02D9.1b | E02D9.1b.1 | E02D9.1b.2 | E02D9.1b.3 | E02D9.1c | E02D9.1d | WBGene00017098 | WP:CE08610 | WP:CE27902 | WP:CE31335 | WP:CE31336
UTGB	GTSSWA200442.01	outron	ahcy-1	K02F2.2.1	chrI	6835504	+	283	0.3676	980	964	CE17154 | CEAHH | K02F2.2 | K02F2.2.1 | K02F2.2.2 | S-adenosylhomocysteine hydrolase, AHH | WBGene00019322 | WP:CE17154 | ahcy-1
UTGB	GTSSWA200443.01	exon	dpf-3	K02F2.1b	chrI	6837976	+	13	11.57	377	-1	CE17153 | CE28837 | K02F2.1 | K02F2.1a | K02F2.1b | WBGene00001056 | WP:CE17153 | WP:CE28837 | dpf-3
UTGB	GTSSWA200444.02	exon	H27M09.5	H27M09.5	chrI	6847302	-	5054	0.3441	350	-1	CE23827 | H27M09.5 | WBGene00019248 | WP:CE23827
UTGB	GTSSWA200445.02	outron	syp-4	H27M09.3	chrI	6847531	+	42	1.358	62	54	CE23830 | H27M09.3 | WBGene00019247 | WP:CE23830 | syp-4
UTGB	GTSSWA200446.01	exon	glh-1	T21G5.3	chrI	6854755	+	1915	11.6	56	-1	CE25121 | T21G5.3 | WBGene00001598 | WP:CE25121 | glh-1 | rhl-2
UTGB	GTSSWA200447.02	exon	T21G5.4	T21G5.4	chrI	6873754	-	43	1.459	70	-1	CE13894 | T21G5.4 | WBGene00020661 | WP:CE13894
UTGB	GTSSWA200448.01	exon	T21G5.1	T21G5.1	chrI	6874302	+	37	0.9571	75	-1	CE13888 | T21G5.1 | WBGene00020659 | WP:CE13888
UTGB	GTSSWA200449.01	exon	C48B6.4	C48B6.4	chrI	6889209	+	269	1.227	44	-1	C48B6.4 | CE08806 | WBGene00016742 | WP:CE08806
UTGB	GTSSWA200450.01	exon	srb-15	C48B6.5	chrI	6901328	-	21	0	709	-1	C48B6.5 | CE38163 | WBGene00016743 | WP:CE38163 | srb-15
UTGB	GTSSWA200451.01	outron	smg-1	C48B6.6a	chrI	6914102	-	14	0	551	523	C48B6.6 | C48B6.6a | C48B6.6b | CE30258 | CE36919 | WBGene00004879 | WP:CE30258 | WP:CE36919 | mab-1 | smg-1
UTGB	GTSSWA200452.02	outron	C48B6.3	C48B6.3.1	chrI	6914231	+	20	0	827	817	C48B6.3 | C48B6.3.1 | C48B6.3.2 | CE08805 | WBGene00016741 | WP:CE08805
UTGB	GTSSWA200453.01	outron	T10B11.6	T10B11.6	chrI	6946108	-	10	1.699	750	750	CE18245 | T10B11.6 | T10B11.6.1 | T10B11.6.2 | WBGene00020402 | WP:CE18245
UTGB	GTSSWA200454.01	outron	T10B11.7	T10B11.7a	chrI	6950707	-	55	0.703	249	208	CE43751 | CE43803 | T10B11.7 | T10B11.7a | T10B11.7a.1 | T10B11.7a.2 | T10B11.7b | WBGene00020403 | WP:CE43751 | WP:CE43803
UTGB	GTSSWA200455.01	exon	T10B11.8	T10B11.8	chrI	6954218	-	36	0	65	-1	CE37405 | CE43979 | T10B11.8 | T10B11.8a | T10B11.8b | WBGene00020404 | WP:CE37405 | WP:CE43979
UTGB	GTSSWA200456.02	outron	C30F12.2	C30F12.2.1	chrI	6970225	-	32	1.038	85	80	C30F12.2 | C30F12.2.1 | C30F12.2.2 | CE16882 | WBGene00016261 | WP:CE16882
UTGB	GTSSWA200457.03	exon	C30F12.4	C30F12.4	chrI	6973708	-	207	1.735	39	-1	C30F12.4 | CE16884 | WBGene00016263 | WP:CE16884
UTGB	GTSSWA200458.05	exon	C30F12.5	C30F12.5	chrI	6999570	-	36	2.013	47	-1	C30F12.5 | C30F12.5a | C30F12.5a.1 | C30F12.5a.2 | C30F12.5b | CE44193 | CE44198 | WBGene00016264 | WP:CE44193 | WP:CE44198
UTGB	GTSSWA200459.02	exon	ctg-1	H06O01.3	chrI	7005702	+	143	0.5042	17	-1	CE17969 | H06O01.3 | WBGene00010370 | WP:CE17969 | ctg-1
UTGB	GTSSWA200460.06	outron	pdi-3	H06O01.1.1	chrI	7020940	-	43	10.95	153	150	CE11570 | H06O01.1 | H06O01.1.1 | H06O01.1.2 | H06O01.1.3 | H06O01.1.4 | WBGene00003964 | WP:CE11570 | pdi-3
UTGB	GTSSWA200461.01	outron	F15C11.2	F15C11.2a	chrI	7021094	+	19	0	887	887	CE09413 | CE31479 | CE31480 | F15C11.2 | F15C11.2a | F15C11.2b | F15C11.2c | WBGene00008852 | WP:CE09413 | WP:CE31479 | WP:CE31480
UTGB	GTSSWA200462.01	exon	W01A8.8	W01A8.8	chrI	7054903	-	45	0.6346	132	-1	CE40427 | W01A8.8 | WBGene00044988 | WP:CE40427
UTGB	GTSSWA200463.02	outron	W01A8.2	W01A8.2	chrI	7056381	-	25	4.302	61	23	CE40426 | W01A8.2 | W01A8.2.1 | W01A8.2.2 | W01A8.2.3 | WBGene00012164 | WP:CE40426
UTGB	GTSSWA200464.01	outron	mdt-28	W01A8.1b.2	chrI	7056510	+	11	0	697	689	CE06531 | CE18303 | CE41705 | W01A8.1 | W01A8.1a | W01A8.1b | W01A8.1b.1 | W01A8.1b.2 | W01A8.1c | W01A8.1c.1 | W01A8.1c.2 | WBGene00007024 | WP:CE06531 | WP:CE18303 | WP:CE41705 | mdt-28
UTGB	GTSSWA200465.01	exon	kin-14	F22D6.1	chrI	7079481	-	55	0	43	-1	CE05682 | F22D6.1 | WBGene00002198 | WP:CE05682 | kin-14
UTGB	GTSSWA200466.01	outron	F22D6.2	F22D6.2.1	chrI	7082019	-	19	7.406	519	499	CE05683 | F22D6.2 | F22D6.2.1 | F22D6.2.2 | F22D6.2.3 | WBGene00009050 | WP:CE05683
UTGB	GTSSWA200467.02	outron	nars-1	F22D6.3a.1	chrI	7090241	-	22	1.743	184	179	CE05684 | F22D6.3 | F22D6.3a | F22D6.3a.1 | F22D6.3a.2 | F22D6.3b | WBGene00003815 | WP:CE05684 | nars-1 | nrs-1
UTGB	GTSSWA200468.01	outron	nduf-6	F22D6.4.1	chrI	7088617	+	20	0	2124	2122	CE05685 | F22D6.4 | F22D6.4.1 | F22D6.4.2 | WBGene00009051 | WP:CE05685 | nduf-6
UTGB	GTSSWA200469.02	outron	prpf-4	F22D6.5	chrI	7094964	-	21	0	453	427	CE05686 | F22D6.5 | WBGene00004186 | WP:CE05686 | prp-4 | prpf-4
UTGB	GTSSWA200470.01	outron	F22D6.8	F22D6.8	chrI	7099675	-	18	0	271	178	CE05689 | F22D6.8 | F22D6.8.1 | F22D6.8.2 | WBGene00043279 | WP:CE05689
UTGB	GTSSWA200471.02	exon	F22D6.9	F22D6.9	chrI	7099988	+	52	0	29	-1	CE24913 | F22D6.9 | WBGene00009054 | WP:CE24913
UTGB	GTSSWA200472.02	exon	F22D6.15	F22D6.15	chrI	7103362	-	40	0	8	-1	CE34825 | F22D6.15 | WBGene00009056 | WP:CE34825
UTGB	GTSSWA200473.01	outron	col-60	F22D6.10	chrI	7105302	+	777	1.677	16	15	CE05691 | F22D6.10 | WBGene00000636 | WP:CE05691 | col-60
UTGB	GTSSWA200474.01	exon	K10D3.6	K10D3.6	chrI	7116705	-	29	0	50	-1	CE29596 | K10D3.6 | WBGene00010740 | WP:CE29596
UTGB	GTSSWA200475.01	exon	unc-14	K10D3.2	chrI	7128259	-	62	0.4788	122	-1	CE25055 | K10D3.2 | WBGene00006753 | WP:CE25055 | unc-14
UTGB	GTSSWA200476.02	exon	K10D3.4	K10D3.4	chrI	7139899	-	88	1.002	228	-1	CE06173 | K10D3.4 | WBGene00010738 | WP:CE06173
UTGB	GTSSWA200477.01	outron	K07G5.6	K07G5.6.1	chrI	7151885	-	21	1.356	71	44	CE26899 | K07G5.6 | K07G5.6.1 | K07G5.6.2 | WBGene00010645 | WP:CE26899
UTGB	GTSSWA200478.01	outron	K07G5.5	K07G5.5	chrI	7170001	+	16	0	23	22	CE06133 | K07G5.5 | WBGene00010644 | WP:CE06133
UTGB	GTSSWA200479.01	outron	M05B5.2	M05B5.2	chrI	7174145	-	10	0	30	22	CE31044 | M05B5.2 | M05B5.2.1 | M05B5.2.2 | WBGene00010870 | WP:CE31044
UTGB	GTSSWA200480.04	exon	M05B5.4	M05B5.4	chrI	7188527	+	50	0.466	10	-1	CE06190 | M05B5.4 | WBGene00010872 | WP:CE06190
UTGB	GTSSWA200481.01	exon	col-61	C01H6.1	chrI	7203529	-	28	0.7315	22	-1	C01H6.1 | CE05184 | WBGene00000637 | WP:CE05184 | col-61
UTGB	GTSSWA200482.03	outron	C01H6.4	C01H6.4	chrI	7210545	+	65	3.9	46	43	C01H6.4 | CE42054 | WBGene00007254 | WP:CE42054
UTGB	GTSSWA200483.01	outron	tag-298	C01H6.7	chrI	7224773	+	188	14.52	59	45	C01H6.7 | C01H6.7a | C01H6.7a.1 | C01H6.7a.2 | C01H6.7b | CE05190 | CE40891 | WBGene00007256 | WP:CE05190 | WP:CE40891 | tag-298
UTGB	GTSSWA200484.02	outron	C01H6.9	C01H6.9	chrI	7233140	-	19	3.041	21	20	C01H6.9 | CE42869 | WBGene00007258 | WP:CE42869
UTGB	GTSSWA200485.03	outron	R06C7.2	R06C7.2	chrI	7234765	-	43	0	265	80	CE36661 | R06C7.2 | WBGene00011062 | WP:CE36661
UTGB	GTSSWA200486.02	outron	R06C7.1	R06C7.1	chrI	7234909	+	62	0.4627	497	473	CE06244 | R06C7.1 | WBGene00011061 | WP:CE06244
UTGB	GTSSWA200487.01	outron	dhp-1	R06C7.3.1	chrI	7243816	-	29	0.5333	64	54	CE30293 | CeCRMP/DHP-1 | R06C7.3 | R06C7.3.1 | R06C7.3.2 | R06C7.3.3 | WBGene00000963 | WP:CE30293 | dhp-1
UTGB	GTSSWA200489.02	outron	lin-61	R06C7.7a.1	chrI	7251297	-	77	0	482	482	CE31573 | CE37542 | R06C7.7 | R06C7.7a | R06C7.7a.1 | R06C7.7a.2 | R06C7.7b | WBGene00003041 | WP:CE31573 | WP:CE37542 | lin-61 | rls-1
UTGB	GTSSWA200490.01	outron	ztf-15	R06C7.9b	chrI	7255410	+	12	2.637	115	99	CE32477 | CE42219 | R06C7.9 | R06C7.9a | R06C7.9a.1 | R06C7.9a.2 | R06C7.9b | WBGene00011066 | WP:CE32477 | WP:CE42219 | ztf-15
UTGB	GTSSWA200491.02	exon	let-75	R06C7.10.1	chrI	7267072	-	858	0.653	138	-1	CE06253 | R06C7.10 | R06C7.10.1 | R06C7.10.2 | WBGene00002348 | WP:CE06253 | let-75 | myo-1 | myosin I
UTGB	GTSSWA200492.01	exon	F21C3.7	F21C3.7	chrI	7279623	-	27	1.04	15	-1	CE42098 | F21C3.7 | WBGene00077548 | WP:CE42098
UTGB	GTSSWA200493.01	exon	pfd-6	F21C3.5	chrI	7283784	-	1430	7.029	45	-1	CE05680 | F21C3.5 | WBGene00009004 | WP:CE05680 | pfd-6
UTGB	GTSSWA200494.01	exon	F21C3.6	F21C3.6	chrI	7285781	-	19	0.6586	20	-1	CE05681 | F21C3.6 | WBGene00009005 | WP:CE05681
UTGB	GTSSWA200495.01	exon	F13G3.12	F13G3.12	chrI	7295758	+	15	0	25	-1	CE34806 | F13G3.12 | WBGene00008770 | WP:CE34806
UTGB	GTSSWA200496.01	exon	F13G3.3	F13G3.3	chrI	7300324	-	17	0	363	-1	CE27124 | CE42750 | F13G3.3 | F13G3.3a | F13G3.3b | F13G3.3b.1 | F13G3.3b.2 | WBGene00008763 | WP:CE27124 | WP:CE42750
UTGB	GTSSWA200497.01	outron	F13G3.6	F13G3.6	chrI	7304780	-	13	19.39	94	91	CE42640 | F13G3.6 | WBGene00008766 | WP:CE42640
UTGB	GTSSWA200498.01	outron	F13G3.7	F13G3.7b.1	chrI	7304900	+	47	0	240	151	CE31477 | CE37822 | F13G3.7 | F13G3.7a | F13G3.7b | F13G3.7b.1 | F13G3.7b.2 | WBGene00008767 | WP:CE31477 | WP:CE37822
UTGB	GTSSWA200499.01	outron	F13G3.11	F13G3.11	chrI	7306833	+	13	15.2	282	282	CE28913 | F13G3.11 | F13G3.11.1 | F13G3.11.2 | WBGene00008769 | WP:CE28913
UTGB	GTSSWA200500.04	outron	F13G3.10	F13G3.10c	chrI	7314392	-	60	0.5429	620	494	CE17660 | CE42530 | CE42541 | F13G3.10 | F13G3.10b | F13G3.10c | F13G3.10c.1 | F13G3.10c.2 | WBGene00008768 | WP:CE17660 | WP:CE42530 | WP:CE42541
UTGB	GTSSWA200501.01	exon	F52A8.3	F52A8.3a	chrI	7325138	-	15	0	1549	-1	CE05910 | CE37019 | F52A8.3 | F52A8.3a | F52A8.3b | WBGene00009916 | WP:CE05910 | WP:CE37019
UTGB	GTSSWA200502.02	outron	F52A8.5	F52A8.5.1	chrI	7347363	-	58	0.5255	643	641	CE05912 | F52A8.5 | F52A8.5.1 | F52A8.5.2 | WBGene00009918 | WP:CE05912
UTGB	GTSSWA200503.03	outron	inx-14	F07A5.1b	chrI	7352107	-	24	3.853	35	22	CE05554 | CE17632 | F07A5.1 | F07A5.1a | F07A5.1b | WBGene00002136 | WP:CE05554 | WP:CE17632 | inx-14 | opu-14
UTGB	GTSSWA200504.01	exon	F07A5.2	F07A5.2	chrI	7352442	+	113	1.238	63	-1	CE05555 | F07A5.2 | WBGene00008541 | WP:CE05555
UTGB	GTSSWA200505.02	outron	scav-6	F07A5.3	chrI	7354408	+	39	0	84	81	CE05556 | F07A5.3 | WBGene00008542 | WP:CE05556 | scav-6
UTGB	GTSSWA200506.03	exon	F07A5.7.1	F07A5.7.1	chrI	7383153	-	283	2.717	72	-1	CE09197 | CE42754 | F07A5.7 | F07A5.7.1 | F07A5.7.2 | F07A5.7.3 | F07A5.7a | F07A5.7b | F07A5.7b.1 | F07A5.7b.2 | F07A5.7b.3 | F07A5.7b.4 | WBGene00006754 | WP:CE09197 | WP:CE42754 | unc-15
UTGB	GTSSWA200507.01	exon	col-7	C15A11.5	chrI	7401674	+	434	1.797	20	-1	C15A11.5 | CE08173 | WBGene00000596 | WP:CE08173 | col-7 | col7
UTGB	GTSSWA200508.01	exon	col-62	C15A11.6	chrI	7404369	-	361	1.819	19	-1	C15A11.6 | CE08174 | WBGene00000638 | WP:CE08174 | col-62
UTGB	GTSSWA200509.04	exon	C15A11.7	C15A11.7a	chrI	7405033	+	269	0.4113	4	-1	C15A11.7 | C15A11.7a | C15A11.7b | CE08175 | WBGene00007599 | WP:CE08175
UTGB	GTSSWA200510.01	exon	spe-4	ZK524.1	chrI	7454695	+	56	1.365	15	-1	CE06618 | WBGene00004958 | WP:CE06618 | ZK524.1 | spe-4
UTGB	GTSSWA200511.01	exon	T28F4.3	T28F4.3	chrI	7486298	-	25	0.5919	261	-1	CE06525 | T28F4.3 | WBGene00012138 | WP:CE06525
UTGB	GTSSWA200513.01	outron	T28F4.6	T28F4.6	chrI	7494690	-	43	1.512	484	481	CE37559 | T28F4.6 | WBGene00012141 | WP:CE37559
UTGB	GTSSWA200514.02	exon	C26C6.6	C26C6.6	chrI	7505947	+	26	0	21	-1	C26C6.6 | CE05315 | WBGene00007740 | WP:CE05315
UTGB	GTSSWA200515.03	exon	C26C6.9	C26C6.9	chrI	7515087	-	588	0.4158	21	-1	C26C6.9 | CE34710 | WBGene00007743 | WP:CE34710
UTGB	GTSSWA200518.01	outron	T25G3.4	T25G3.4	chrI	7564562	+	13	1.73	19	17	CE14180 | T25G3.4 | T25G3.4.1 | T25G3.4.2 | WBGene00012031 | WP:CE14180
UTGB	GTSSWA200519.01	outron	D2030.1	D2030.1.1	chrI	7571841	-	15	2.216	1526	1292	CE09078 | D2030.1 | D2030.1.1 | D2030.1.2 | WBGene00008411 | WP:CE09078
UTGB	GTSSWA200520.05	outron	D2030.2	D2030.2a.1	chrI	7574222	+	25	15.44	52	49	CE09079 | CE35176 | D2030.2 | D2030.2a | D2030.2a.1 | D2030.2a.2 | D2030.2a.3 | D2030.2b | D2030.2b.1 | D2030.2b.2 | D2030.2b.3 | D2030.2b.4 | D2030.2b.5 | D2030.2b.6 | D2030.2b.7 | WBGene00008412 | WP:CE09079 | WP:CE35176
UTGB	GTSSWA200521.01	outron	D2030.4	D2030.4.1	chrI	7581847	-	24	0.8493	228	223	CE09081 | D2030.4 | D2030.4.1 | D2030.4.2 | WBGene00008414 | WP:CE09081
UTGB	GTSSWA200522.03	outron	prg-1	D2030.6.1	chrI	7588507	-	27	9.286	150	144	CE09083 | D2030.6 | D2030.6.1 | D2030.6.2 | WBGene00004178 | WP:CE09083 | prg-1
UTGB	GTSSWA200523.01	exon	D2030.7	D2030.7	chrI	7586491	+	215	0	2226	-1	CE30270 | D2030.7 | WBGene00008417 | WP:CE30270
UTGB	GTSSWA200524.02	exon	aex-1	D2030.10b	chrI	7602306	+	49	0	13	-1	CE30740 | CE30741 | D2030.10 | D2030.10a | D2030.10a.1 | D2030.10a.2 | D2030.10b | WBGene00000084 | WP:CE30740 | WP:CE30741 | aex-1
UTGB	GTSSWA200525.03	exon	ncbp-2	F26A3.2	chrI	7643263	-	69	3.579	26	-1	CE09667 | F26A3.2 | WBGene00009141 | WP:CE09667 | ncbp-2
UTGB	GTSSWA200526.02	outron	F26A3.4	F26A3.4.1	chrI	7659130	-	92	0.8287	855	843	CE09669 | F26A3.4 | F26A3.4.1 | F26A3.4.2 | WBGene00009142 | WP:CE09669
UTGB	GTSSWA200527.01	outron	F26A3.7	F26A3.7	chrI	7676272	-	21	0	156	154	CE09672 | F26A3.7 | WBGene00009145 | WP:CE09672
UTGB	GTSSWA200528.01	outron	gld-1	T23G11.3	chrI	7695445	+	20	15.49	246	231	CE14096 | T23G11.3 | T23G11.3.1 | T23G11.3.2 | WBGene00001595 | WP:CE14096 | gld-1
UTGB	GTSSWA200529.09	exon	T23G11.10	T23G11.10	chrI	7697771	+	327	3.963	525	-1	CE42173 | T23G11.10 | WBGene00011973 | WP:CE42173
UTGB	GTSSWA200531.02	exon	T23G11.1	T23G11.1	chrI	7702030	-	175	1.296	65	-1	CE14092 | T23G11.1 | WBGene00011968 | WP:CE14092
UTGB	GTSSWA200532.03	outron	F27D4.1	F27D4.1	chrI	7701125	+	33	1.128	1304	1299	CE24926 | F27D4.1 | F27D4.1.1 | F27D4.1.2 | WBGene00009187 | WP:CE24926
UTGB	GTSSWA200533.04	outron	F27D4.7	F27D4.7	chrI	7724718	-	92	3.296	68	66	CE34829 | F27D4.7 | WBGene00009191 | WP:CE34829
UTGB	GTSSWA200534.01	outron	F27D4.4	F27D4.4a.1	chrI	7724821	+	16	0.6556	203	193	CE40046 | CE41229 | F27D4.4 | F27D4.4a | F27D4.4a.1 | F27D4.4a.2 | F27D4.4b | WBGene00009189 | WP:CE40046 | WP:CE41229
UTGB	GTSSWA200535.01	outron	tag-173	F27D4.5	chrI	7727237	+	27	0	25	25	CE05736 | F27D4.5 | F27D4.5.1 | F27D4.5.2 | WBGene00006518 | WP:CE05736 | tag-173
UTGB	GTSSWA200536.01	outron	F27D4.6	F27D4.6a.1	chrI	7731116	+	12	6.624	69	54	CE32394 | CE41895 | F27D4.6 | F27D4.6a | F27D4.6a.1 | F27D4.6a.2 | F27D4.6a.3 | F27D4.6b | WBGene00009190 | WP:CE32394 | WP:CE41895
UTGB	GTSSWA200537.02	outron	F58H10.1	F58H10.1	chrI	7755746	+	15	0	31	14	CE36173 | F58H10.1 | WBGene00010291 | WP:CE36173
UTGB	GTSSWA200538.02	outron	adr-1	H15N14.1g	chrI	7772757	+	95	0.8666	675	655	CE32459 | CE33125 | CE33126 | CE33127 | CE33128 | H15N14.1 | H15N14.1c | H15N14.1c.1 | H15N14.1c.2 | H15N14.1d | H15N14.1e | H15N14.1f | H15N14.1g | WBGene00000079 | WP:CE32459 | WP:CE33125 | WP:CE33126 | WP:CE33127 | WP:CE33128 | adr-1 | adr-1c | adr-1d | adr-1e | adr-1f | adr-1g
UTGB	GTSSWA200539.03	outron	D2005.4	D2005.4.1	chrI	7815017	+	26	2.17	245	225	CE42818 | D2005.4 | D2005.4.1 | D2005.4.2 | WBGene00008399 | WP:CE42818
UTGB	GTSSWA200540.01	exon	F30F8.1	F30F8.1	chrI	7835403	-	112	19.23	67	-1	CE09813 | F30F8.1 | WBGene00009270 | WP:CE09813
UTGB	GTSSWA200541.01	outron	F30F8.3	F30F8.3	chrI	7835710	+	65	0	111	98	CE27147 | F30F8.3 | F30F8.3.1 | F30F8.3.2 | WBGene00009272 | WP:CE27147
UTGB	GTSSWA200542.01	exon	F30F8.5	F30F8.5a	chrI	7848869	-	103	1.632	21	-1	CE37511 | CE40953 | F30F8.5 | F30F8.5a | F30F8.5b | WBGene00009274 | WP:CE37511 | WP:CE40953
UTGB	GTSSWA200543.03	outron	nud-2	R11A5.2	chrI	7861497	-	40	0	2099	2085	CE12724 | R11A5.2 | WBGene00011230 | WP:CE12724 | nud-2
UTGB	GTSSWA200545.04	exon	R11A5.4	R11A5.4b.1	chrI	7866350	+	2005	3.002	45	-1	CE12728 | CE36358 | CE36359 | CE36360 | R11A5.4 | R11A5.4a | R11A5.4a.1 | R11A5.4a.2 | R11A5.4b | R11A5.4b.1 | R11A5.4b.2 | R11A5.4c | R11A5.4c.1 | R11A5.4c.2 | R11A5.4c.3 | R11A5.4c.4 | R11A5.4d | R11A5.4d.1 | R11A5.4d.2 | R11A5.4d.3 | R11A5.4d.4 | R11A5.4d.5 | R11A5.4d.6 | WBGene00011232 | WP:CE12728 | WP:CE36358 | WP:CE36359 | WP:CE36360
UTGB	GTSSWA200546.03	outron	F55D12.2	F55D12.2	chrI	7889348	+	45	0.9074	203	167	CE32439 | CE43569 | F55D12.2 | F55D12.2a | F55D12.2b | WBGene00010111 | WP:CE32439 | WP:CE43569
UTGB	GTSSWA200547.01	outron	smgl-1	F20G4.1	chrI	7927045	-	92	16.64	713	712	CE34296 | F20G4.1 | WBGene00008990 | WP:CE34296 | smgl-1
UTGB	GTSSWA200548.01	outron	F20G4.3.1	F20G4.3.1	chrI	7935759	-	35	14.45	1221	1187	CE27133 | F20G4.3 | F20G4.3.1 | F20G4.3.2 | WBGene00003777 | WP:CE27133 | nmy-2
UTGB	GTSSWA200549.04	outron	T22C1.1	T22C1.1.1	chrI	7936238	+	18	0	22	20	CE36611 | T22C1.1 | T22C1.1.1 | T22C1.1.2 | WBGene00011912 | WP:CE36611
UTGB	GTSSWA200550.05	exon	T22C1.4	T22C1.4	chrI	7940735	-	59	2.755	43	-1	CE41266 | T22C1.4 | WBGene00011915 | WP:CE41266
UTGB	GTSSWA200551.01	outron	T22C1.5	T22C1.5	chrI	7940161	+	10	1.699	898	750	CE42696 | T22C1.5 | WBGene00011916 | WP:CE42696
UTGB	GTSSWA200552.01	outron	T22C1.6	T22C1.6	chrI	7942874	+	48	0.4904	61	42	CE24002 | T22C1.6 | WBGene00011917 | WP:CE24002
UTGB	GTSSWA200553.02	outron	jph-1	T22C1.7	chrI	7952442	-	10	1.699	903	854	CE30566 | JP | T22C1.7 | WBGene00002179 | WP:CE30566 | jph-1
UTGB	GTSSWA200554.01	exon	T22C1.8	T22C1.8	chrI	7958439	-	52	0.5339	125	-1	CE18278 | T22C1.8 | WBGene00011918 | WP:CE18278
UTGB	GTSSWA200555.01	exon	T22C1.9	T22C1.9	chrI	7958678	+	46	0	25	-1	CE32498 | T22C1.9 | WBGene00011919 | WP:CE32498
UTGB	GTSSWA200556.01	exon	H05L14.1	H05L14.1	chrI	7977072	-	31	0	78	-1	CE16168 | H05L14.1 | WBGene00010366 | WP:CE16168
UTGB	GTSSWA200557.01	exon	dod-18	C54G4.6	chrI	8022955	-	13	1.447	2093	-1	C54G4.6 | CE42082 | WBGene00008316 | WP:CE42082 | dod-18
UTGB	GTSSWA200558.01	outron	iftb-1	K04G2.1.1	chrI	8027938	-	18	0	181	151	CE16227 | K04G2.1 | K04G2.1.1 | K04G2.1.2 | K04G2.1.3 | WBGene00010560 | WP:CE16227 | iftb-1 | phi-17
UTGB	GTSSWA200559.01	outron	K04G2.2	K04G2.2	chrI	8028058	+	20	0.6901	2917	2895	CE37533 | K04G2.2 | WBGene00010561 | WP:CE37533
UTGB	GTSSWA200560.01	exon	K04G2.4	K04G2.4	chrI	8035880	+	16	0.8493	83	-1	CE06098 | K04G2.4 | WBGene00010563 | WP:CE06098
UTGB	GTSSWA200561.01	outron	K04G2.11	K04G2.11	chrI	8040583	-	11	0	323	68	CE27389 | K04G2.11 | K04G2.11.1 | K04G2.11.2 | WBGene00010569 | WP:CE27389
UTGB	GTSSWA200562.01	outron	T28B8.1	T28B8.1.1	chrI	8133880	+	290	0.6494	258	229	CE14329 | T28B8.1 | T28B8.1.1 | T28B8.1.2 | WBGene00012113 | WP:CE14329
UTGB	GTSSWA200563.02	exon	ins-18	T28B8.2	chrI	8147483	+	144	0.4159	16	-1	CE27217 | Ceinsulin-1 | T28B8.2 | WBGene00002101 | WP:CE27217 | igf-1 | ins-1 | ins-18
UTGB	GTSSWA200564.02	exon	T28B8.6	T28B8.6	chrI	8150343	+	19	5.817	17	-1	CE41268 | T28B8.6 | WBGene00044122 | WP:CE41268
UTGB	GTSSWA200565.02	exon	T02E1.7	T02E1.7	chrI	8210659	-	103	2.605	25	-1	CE13058 | T02E1.7 | WBGene00011379 | WP:CE13058
UTGB	GTSSWA200567.06	outron	gla-3	T02E1.3a	chrI	8214347	+	62	4.893	56	28	CE18170 | CE18171 | CE32481 | T02E1.3 | T02E1.3a | T02E1.3b | T02E1.3c | WBGene00011376 | WP:CE18170 | WP:CE18171 | WP:CE32481 | gla-3
UTGB	GTSSWA200566.01	outron	dhs-3	T02E1.5b	chrI	8218442	-	47	1.65	161	124	CE41004 | CE41005 | CE41006 | T02E1.5 | T02E1.5a | T02E1.5b | T02E1.5c | T02E1.5c.1 | T02E1.5c.2 | WBGene00000967 | WP:CE41004 | WP:CE41005 | WP:CE41006 | dhs-3
UTGB	GTSSWA200568.01	outron	T02E1.2	T02E1.2	chrI	8223032	-	20	0.7913	37	29	CE32480 | T02E1.2 | WBGene00011375 | WP:CE32480
UTGB	GTSSWA200569.01	exon	spe-12	T02E1.1	chrI	8226290	-	30	0	37	-1	CE13046 | T02E1.1 | WBGene00004966 | WP:CE13046 | spe-12
UTGB	GTSSWA200570.01	exon	ZK265.3	ZK265.3	chrI	8242116	+	56	0	17	-1	CE15293 | WBGene00013956 | WP:CE15293 | ZK265.3
UTGB	GTSSWA200571.01	exon	col-63	ZK265.2	chrI	8245615	-	7446	1.595	673	-1	CE15291 | WBGene00000639 | WP:CE15291 | ZK265.2 | col-63
UTGB	GTSSWA200572.02	outron	ZK265.9	ZK265.9	chrI	8254954	-	25	0	40	34	CE38132 | WBGene00044094 | WP:CE38132 | ZK265.9
UTGB	GTSSWA200573.03	exon	T01G9.3	T01G9.3	chrI	8281984	+	23	0	74	-1	CE06340 | T01G9.3 | WBGene00011345 | WP:CE06340
UTGB	GTSSWA200574.01	outron	kin-10	T01G9.6a.1	chrI	8291115	-	10	0	308	117	CE06343 | CE18168 | T01G9.6 | T01G9.6a | T01G9.6a.1 | T01G9.6a.2 | T01G9.6b | T01G9.6b.1 | T01G9.6b.2 | T01G9.6b.3 | WBGene00002196 | WP:CE06343 | WP:CE18168 | kin-10 | kin-5
UTGB	GTSSWA200575.01	exon	F52B5.7	F52B5.7	chrI	8315336	-	42	2.895	25	-1	CE34874 | F52B5.7 | WBGene00009923 | WP:CE34874
UTGB	GTSSWA200576.01	outron	F52B5.3	F52B5.3	chrI	8324047	-	48	7.013	71	67	CE05718 | F52B5.3 | WBGene00009922 | WP:CE05718
UTGB	GTSSWA200577.06	exon	mys-4	C34B7.4	chrI	8333146	+	377	0.9812	44	-1	C34B7.4 | CE27818 | WBGene00007914 | WP:CE27818 | mys-4
UTGB	GTSSWA200578.01	outron	cyp-36A1	C34B7.3	chrI	8348525	-	38	0.993	2510	2509	C34B7.3 | CE08567 | WBGene00007913 | WP:CE08567 | cyp-36A1
UTGB	GTSSWA200579.01	exon	T19A6.1	T19A6.1b	chrI	8392731	-	68	1.652	140	-1	CE41261 | CE41262 | CE41263 | T19A6.1 | T19A6.1a | T19A6.1a.1 | T19A6.1a.2 | T19A6.1b | T19A6.1c | WBGene00011827 | WP:CE41261 | WP:CE41262 | WP:CE41263
UTGB	GTSSWA200580.01	exon	T19A6.4	T19A6.4	chrI	8401393	+	29	2.948	14	-1	CE38224 | T19A6.4 | WBGene00011829 | WP:CE38224
UTGB	GTSSWA200581.01	outron	F02E9.1	F02E9.1	chrI	8406821	+	18	0.6248	98	48	CE09183 | F02E9.1 | WBGene00008528 | WP:CE09183
UTGB	GTSSWA200582.02	outron	sod-2	F10D11.1.2	chrI	8434484	+	54	1.282	65	59	CE09323 | F10D11.1 | F10D11.1.1 | F10D11.1.2 | WBGene00004931 | WP:CE09323 | sdm-1 | sod-2
UTGB	GTSSWA200583.02	outron	F10D11.2	F10D11.2	chrI	8438624	-	93	0	44	33	CE32366 | F10D11.2 | WBGene00008648 | WP:CE32366
UTGB	GTSSWA200584.01	exon	F10D11.3	F10D11.3	chrI	8440481	-	49	1.384	17	-1	CE09325 | F10D11.3 | WBGene00008649 | WP:CE09325
UTGB	GTSSWA200585.02	exon	F10D11.4	F10D11.4	chrI	8442446	-	95	1.043	119	-1	CE09326 | F10D11.4 | WBGene00008650 | WP:CE09326
UTGB	GTSSWA200586.01	exon	F10D11.5	F10D11.5	chrI	8444977	-	18	0	52	-1	CE17650 | F10D11.5 | WBGene00008651 | WP:CE17650
UTGB	GTSSWA200587.01	exon	D1081.11	D1081.11	chrI	8473495	-	16	1.031	20	-1	CE41532 | D1081.11 | WBGene00050879 | WP:CE41532
UTGB	GTSSWA200588.02	outron	D1081.9	D1081.9	chrI	8487340	-	26	3.81	303	290	CE23619 | D1081.9 | WBGene00008387 | WP:CE23619
UTGB	GTSSWA200589.01	outron	D1081.7	D1081.7b	chrI	8487496	+	100	0.8954	140	115	CE05539 | CE41211 | D1081.7 | D1081.7a | D1081.7b | WBGene00008385 | WP:CE05539 | WP:CE41211
UTGB	GTSSWA200590.01	outron	sec-12	K02B12.3.1	chrI	8511378	-	17	18.26	69	69	CE32461 | K02B12.3 | K02B12.3.1 | K02B12.3.2 | WBGene00010496 | WP:CE32461 | phi-15 | sec-12
UTGB	GTSSWA200591.01	exon	K02B12.2	K02B12.2	chrI	8512410	-	36	2.397	65	-1	CE06063 | K02B12.2 | WBGene00010495 | WP:CE06063
UTGB	GTSSWA200592.01	outron	rskn-1	T01H8.1e	chrI	8582066	-	35	0	1971	1965	CE34493 | CE34494 | CE34495 | CE38217 | CE41000 | T01H8.1 | T01H8.1a | T01H8.1b | T01H8.1c | T01H8.1d | T01H8.1d.1 | T01H8.1d.2 | T01H8.1e | WBGene00011352 | WP:CE34493 | WP:CE34494 | WP:CE34495 | WP:CE38217 | WP:CE41000 | rskn-1
UTGB	GTSSWA200593.02	outron	ran-4	R05D11.3.1	chrI	8590809	+	77	0.4566	401	399	CE06238 | R05D11.3 | R05D11.3.1 | R05D11.3.2 | WBGene00004305 | WP:CE06238 | ran-4
UTGB	GTSSWA200594.01	exon	edc-3	R05D11.8	chrI	8602137	+	14	0.8493	10	-1	CE06243 | R05D11.8 | R05D11.8.1 | R05D11.8.2 | WBGene00011036 | WP:CE06243 | edc-3
UTGB	GTSSWA200595.01	outron	F43G9.3	F43G9.3	chrI	8615126	-	16	2.783	370	300	CE10358 | F43G9.3 | WBGene00009666 | WP:CE10358
UTGB	GTSSWA200596.03	outron	cfim-1	F43G9.5	chrI	8615278	+	23	0.5724	108	103	CE10362 | F43G9.5 | WBGene00009668 | WP:CE10362 | cfim-1
UTGB	GTSSWA200597.04	outron	cpn-1	F43G9.9.2	chrI	8637180	-	47	1.756	63	60	CE10370 | F43G9.9 | F43G9.9.1 | F43G9.9.2 | WBGene00000777 | WP:CE10370 | cpn-1
UTGB	GTSSWA200598.01	outron	syp-3	F39H2.4	chrI	8664452	-	58	0.4517	344	338	CE41238 | F39H2.4 | WBGene00006377 | WP:CE41238 | syp-3
UTGB	GTSSWA200599.01	outron	F39H2.3	F39H2.3.1	chrI	8664933	+	62	2.586	36	36	CE37516 | F39H2.3 | F39H2.3.1 | F39H2.3.2 | WBGene00009563 | WP:CE37516
UTGB	GTSSWA200600.01	outron	K07A12.1	K07A12.1	chrI	8666280	+	13	5.097	506	308	CE18019 | K07A12.1 | K07A12.1.1 | K07A12.1.2 | WBGene00010620 | WP:CE18019
UTGB	GTSSWA200601.01	outron	K07A12.2	K07A12.2	chrI	8681640	-	73	17.4	409	321	CE11866 | K07A12.2 | WBGene00010621 | WP:CE11866
UTGB	GTSSWA200602.01	exon	hot-5	K07A12.6	chrI	8687109	-	11	0	25	-1	CE11874 | K07A12.6 | WBGene00001990 | WP:CE11874 | hot-5
UTGB	GTSSWA200603.01	outron	asg-1	K07A12.3.1	chrI	8692775	+	21	0	166	164	CE11868 | K07A12.3 | K07A12.3.1 | K07A12.3.2 | WBGene00000209 | WP:CE11868 | asg-1
UTGB	GTSSWA200604.03	outron	pbs-7	F39H11.5.1	chrI	8696340	-	25	1.311	54	47	CE20761 | F39H11.5 | F39H11.5.1 | F39H11.5.2 | WBGene00003953 | WP:CE20761 | pbs-7
UTGB	GTSSWA200605.01	outron	tlf-1	F39H11.2a	chrI	8702398	-	26	0.5839	447	433	CE27159 | CE42480 | F39H11.2 | F39H11.2a | F39H11.2b | WBGene00006577 | WP:CE27159 | WP:CE42480 | tlf-1
UTGB	GTSSWA200606.01	exon	cdk-8	F39H11.3	chrI	8702484	+	51	6.094	71	-1	CE32409 | F39H11.3 | WBGene00000409 | WP:CE32409 | cdk-8
UTGB	GTSSWA200607.01	outron	pas-4	C36B1.4.1	chrI	8728544	-	45	0.5574	63	63	C36B1.4 | C36B1.4.1 | C36B1.4.2 | CE05371 | WBGene00003925 | WP:CE05371 | pas-4
UTGB	GTSSWA200608.02	outron	rpb-3	C36B1.3	chrI	8728717	+	19	1.836	45	43	C36B1.3 | CE39091 | WBGene00007971 | WP:CE39091 | rpb-3
UTGB	GTSSWA200609.01	outron	C36B1.14	C36B1.14	chrI	8730075	+	16	0.8493	77	74	C36B1.14 | CE39090 | WBGene00044614 | WP:CE39090
UTGB	GTSSWA200610.02	exon	gska-3	C36B1.10	chrI	8751362	-	86	0.5039	71	-1	C36B1.10 | CE05377 | WBGene00007977 | WP:CE05377 | gska-3
UTGB	GTSSWA200611.02	outron	DY3.8	DY3.8	chrI	8759070	-	17	0	81	80	CE36431 | DY3.8 | DY3.8.1 | DY3.8.2 | WBGene00008440 | WP:CE36431
UTGB	GTSSWA200612.01	outron	tin-13	DY3.1	chrI	8759861	-	19	0	88	79	CE15745 | DY3.1 | WBGene00006574 | WP:CE15745 | tim-13 | tim13 | tin-13
UTGB	GTSSWA200613.02	outron	lmn-1	DY3.2.1	chrI	8760324	+	39	2.067	2725	2710	CE15746 | DY3.2 | DY3.2.1 | DY3.2.2 | Lam1 | WBGene00003052 | WP:CE15746 | lmn-1
UTGB	GTSSWA200614.01	outron	F36A2.3	F36A2.3	chrI	8796886	+	13	0	1923	1892	CE15964 | F36A2.3 | F36A2.3.1 | F36A2.3.2 | WBGene00009453 | WP:CE15964
UTGB	GTSSWA200616.01	outron	phip-1	F36A2.8	chrI	8808460	+	11	2.725	409	395	CE32406 | F36A2.8 | WBGene00009455 | WP:CE32406 | phip-1
UTGB	GTSSWA200617.01	exon	F36A2.10	F36A2.10	chrI	8820109	-	84	4.529	38	-1	CE09949 | F36A2.10 | F36A2.10.1 | F36A2.10.2 | WBGene00009457 | WP:CE09949
UTGB	GTSSWA200618.02	exon	F36A2.11	F36A2.11	chrI	8822188	+	41	0.9482	93	-1	CE34181 | F36A2.11 | WBGene00009458 | WP:CE34181
UTGB	GTSSWA200619.01	exon	F36A2.14	F36A2.14	chrI	8825610	-	155	0.3816	142	-1	CE37233 | F36A2.14 | WBGene00023490 | WP:CE37233
UTGB	GTSSWA200620.04	exon	F36A2.12	F36A2.12	chrI	8826636	-	28	0	66	-1	CE37232 | F36A2.12 | WBGene00009459 | WP:CE37232
UTGB	GTSSWA200621.01	exon	F29D10.2	F29D10.2	chrI	8841741	+	26	0	21	-1	CE38335 | F29D10.2 | WBGene00009251 | WP:CE38335
UTGB	GTSSWA200622.01	outron	ztf-26	F55H12.6a	chrI	8861874	-	10	0	609	609	CE05764 | CE37023 | CE40968 | F55H12.6 | F55H12.6a | F55H12.6b | F55H12.6c | WBGene00010137 | WP:CE05764 | WP:CE37023 | WP:CE40968 | ztf-26
UTGB	GTSSWA200623.01	exon	snf-2	F55H12.1	chrI	8871860	+	20	1.933	83	-1	CE42587 | F55H12.1 | WBGene00004901 | WP:CE42587 | snf-2
UTGB	GTSSWA200624.01	outron	F55H12.4	F55H12.4	chrI	8894513	-	59	0	384	383	CE11212 | F55H12.4 | WBGene00010135 | WP:CE11212
UTGB	GTSSWA200625.05	outron	T08G11.4	T08G11.4a.1	chrI	8905512	-	25	0	72	53	CE13449 | CE23958 | T08G11.4 | T08G11.4a | T08G11.4a.1 | T08G11.4a.2 | T08G11.4b | T08G11.4b.1 | T08G11.4b.2 | T08G11.4b.3 | T08G11.4b.4 | WBGene00011631 | WP:CE13449 | WP:CE23958
UTGB	GTSSWA200626.01	exon	T08G11.2	T08G11.2	chrI	8920508	-	23	0	49	-1	CE13445 | T08G11.2 | WBGene00044684 | WP:CE13445
UTGB	GTSSWA200627.01	outron	F53B6.2	F53B6.2a	chrI	8944721	-	10	0	2524	2443	CE32429 | CE36859 | F53B6.2 | F53B6.2a | F53B6.2b | WBGene00009958 | WP:CE32429 | WP:CE36859
UTGB	GTSSWA200628.01	exon	fip-6	F53B6.9	chrI	8946192	-	31	1.823	20	-1	CE30539 | F53B6.9 | WBGene00009964 | WP:CE30539 | fip-6
UTGB	GTSSWA200629.01	exon	fipr-26	F53B6.8	chrI	8947192	-	16	0	23	-1	CE23765 | F53B6.8 | WBGene00009963 | WP:CE23765 | fipr-26
UTGB	GTSSWA200630.01	exon	F53B6.7	F53B6.7	chrI	8948773	+	92	0.4143	38	-1	CE32430 | CE34486 | F53B6.5 | F53B6.7 | WBGene00009960 | WBGene00009962 | WP:CE32430 | WP:CE34486
UTGB	GTSSWA200631.03	outron	gei-11	F32H2.1b	chrI	8961585	+	21	0	757	729	CE09876 | CE17749 | F32H2.1 | F32H2.1a | F32H2.1b | WBGene00001568 | WP:CE09876 | WP:CE17749 | gei-11
UTGB	GTSSWA200632.01	outron	F32H2.10	F32H2.10	chrI	8970198	+	16	2.797	109	87	CE28926 | F32H2.10 | WBGene00009346 | WP:CE28926
UTGB	GTSSWA200633.01	exon	F32H2.12	F32H2.12	chrI	8975898	-	71	7.524	1330	-1	CE41534 | F32H2.12 | WBGene00050880 | WP:CE41534
UTGB	GTSSWA200634.02	exon	fasn-1	F32H2.5	chrI	8986277	-	181	0.4293	1513	-1	CE42777 | F32H2.5 | WBGene00009342 | WP:CE42777 | fasn-1
UTGB	GTSSWA200635.03	outron	tag-214	F36F2.3b	chrI	9014040	-	65	1.858	189	162	CE34550 | CE39152 | F36F2.3 | F36F2.3a | F36F2.3b | WBGene00009477 | WP:CE34550 | WP:CE39152 | tag-214
UTGB	GTSSWA200636.01	outron	F36F2.2	F36F2.2	chrI	9016564	+	13	2.894	225	194	CE15976 | F36F2.2 | WBGene00009476 | WP:CE15976
UTGB	GTSSWA200637.02	exon	F36F2.1	F36F2.1	chrI	9018667	+	27	0	59	-1	CE15975 | CE42715 | F36F2.1 | F36F2.1a | F36F2.1b | F36F2.1b.1 | F36F2.1b.2 | WBGene00009475 | WP:CE15975 | WP:CE42715
UTGB	GTSSWA200638.02	exon	hgo-1	W06D4.1	chrI	9055391	-	1027	3.803	63	-1	CE29602 | HGO | W06D4.1 | WBGene00001843 | WP:CE29602 | hgo-1
UTGB	GTSSWA200639.01	outron	rad-54	W06D4.6	chrI	9064993	+	32	0.7777	86	84	CE25143 | W06D4.6 | WBGene00004298 | WP:CE25143 | rad-54
UTGB	GTSSWA200640.01	outron	mef-2	W10D5.1	chrI	9095577	+	16	0	427	372	CE25156 | W10D5.1 | WBGene00003182 | WP:CE25156 | mef-2
UTGB	GTSSWA200641.02	exon	ZK858.2	ZK858.2	chrI	9124475	-	52	0.5839	41	-1	CE15423 | WBGene00014116 | WP:CE15423 | ZK858.2
UTGB	GTSSWA200642.12	exon	ZK858.8	ZK858.8	chrI	9124685	+	894	0.3578	35	-1	CE35173 | WBGene00014121 | WP:CE35173 | ZK858.8
UTGB	GTSSWA200644.01	outron	ZK858.6.2	ZK858.6.2	chrI	9141936	-	10	1.184	423	420	CE15431 | CE16751 | WBGene00014119 | WP:CE15431 | WP:CE16751 | ZK858.6 | ZK858.6.1 | ZK858.6.2 | ZK858.6a | ZK858.6b | ZK858.6b.1 | ZK858.6b.2
UTGB	GTSSWA200645.03	exon	H32K16.1	H32K16.1	chrI	9149682	+	69	0	27	-1	CE16186 | H32K16.1 | WBGene00010421 | WP:CE16186
UTGB	GTSSWA200646.01	exon	H32K16.2	H32K16.2	chrI	9154744	-	15	0	46	-1	CE34907 | H32K16.2 | WBGene00010422 | WP:CE34907
UTGB	GTSSWA200647.01	outron	F25H5.7	F25H5.7	chrI	9155506	+	38	0	48	22	CE15903 | F25H5.7 | WBGene00009129 | WP:CE15903
UTGB	GTSSWA200648.01	outron	F25H5.5	F25H5.5	chrI	9163465	-	24	0	292	211	CE42710 | F25H5.5 | WBGene00009127 | WP:CE42710
UTGB	GTSSWA200649.01	exon	eef-2	F25H5.4.2	chrI	9163569	+	14781	9.48	77	-1	CE15900 | F25H5.4 | F25H5.4.1 | F25H5.4.2 | F25H5.4.3 | F25H5.4.4 | WBGene00001167 | WP:CE15900 | eef-2 | eft-2
UTGB	GTSSWA200650.01	outron	F25H5.8	F25H5.8	chrI	9178786	-	70	0	96	90	CE24917 | F25H5.8 | WBGene00009130 | WP:CE24917
UTGB	GTSSWA200651.02	outron	F25H5.2	F25H5.2	chrI	9181035	-	52	2.717	39	16	CE15897 | F25H5.2 | WBGene00009125 | WP:CE15897
UTGB	GTSSWA200652.06	exon	gip-2	C45G3.3	chrI	9226945	+	84	0.8711	38	-1	C45G3.3 | CE37811 | WBGene00001590 | WP:CE37811 | gip-2
UTGB	GTSSWA200653.01	outron	aph-1	VF36H2L.1	chrI	9234349	-	12	12.78	799	796	CE16526 | VF36H2L.1 | WBGene00000147 | WP:CE16526 | aph-1 | pen-1
UTGB	GTSSWA200654.02	exon	F36H2.2	F36H2.2	chrI	9249355	-	20	0	142	-1	CE36380 | F36H2.2 | WBGene00009499 | WP:CE36380
UTGB	GTSSWA200655.01	exon	F14B4.1	F14B4.1	chrI	9271876	-	23	0	969	-1	CE38950 | F14B4.1 | WBGene00008779 | WP:CE38950
UTGB	GTSSWA200656.01	outron	F14B4.3	F14B4.3	chrI	9287161	-	39	7.789	607	604	CE05629 | F14B4.3 | WBGene00008781 | WP:CE05629
UTGB	GTSSWA200657.01	outron	prom-1	F26H9.1	chrI	9287277	+	14	0	161	153	CE41801 | F26H9.1 | WBGene00009173 | WP:CE41801 | prom-1
UTGB	GTSSWA200658.01	exon	F26H9.8	F26H9.8	chrI	9317683	+	12	0	44	-1	CE42103 | F26H9.8 | WBGene00009178 | WP:CE42103
UTGB	GTSSWA200659.01	exon	hsp-70	C12C8.1	chrI	9322525	-	10	0	52	-1	C12C8.1 | CE08110 | WBGene00002026 | WP:CE08110 | hsp-70
UTGB	GTSSWA200660.01	outron	lin-41	C12C8.3a	chrI	9342071	-	18	0.6746	182	166	C12C8.3 | C12C8.3a | C12C8.3b | C12C8.3b.1 | C12C8.3b.2 | CE27062 | CE27063 | WBGene00003026 | WP:CE27062 | WP:CE27063 | lep-1 | lin-41 | lin-41A | lin-41B
UTGB	GTSSWA200661.01	outron	C17E4.3	C17E4.3	chrI	9418955	-	19	0	89	80	C17E4.3 | CE37199 | WBGene00007643 | WP:CE37199
UTGB	GTSSWA200663.01	exon	F46A9.1	F46A9.1	chrI	9457853	+	13	0	36	-1	CE10572 | F46A9.1 | WBGene00009754 | WP:CE10572
UTGB	GTSSWA200664.01	exon	F46A9.2	F46A9.2	chrI	9459279	+	22	0	16	-1	CE10574 | F46A9.2 | WBGene00009755 | WP:CE10574
UTGB	GTSSWA200665.02	outron	skr-1	F46A9.5.1	chrI	9470779	+	12	1.926	776	763	CE10580 | F46A9.5 | F46A9.5.1 | F46A9.5.2 | F46A9.5.3 | WBGene00004807 | WP:CE10580 | skr-1
UTGB	GTSSWA200666.02	exon	F30A10.14	F30A10.14	chrI	9476596	+	176	0.8016	26	-1	CE41232 | F30A10.14 | WBGene00045473 | WP:CE41232
UTGB	GTSSWA200667.02	exon	F30A10.2	F30A10.2	chrI	9480650	-	11	0	118	-1	CE39360 | F30A10.2 | WBGene00009261 | WP:CE39360
UTGB	GTSSWA200668.01	exon	F30A10.12	F30A10.12	chrI	9481636	+	21	0	64	-1	CE34834 | F30A10.12 | WBGene00009269 | WP:CE34834
UTGB	GTSSWA200669.03	outron	stl-1	F30A10.5.1	chrI	9488246	-	59	1.076	228	225	CE32397 | F30A10.5 | F30A10.5.1 | F30A10.5.2 | WBGene00006061 | WP:CE32397 | stl-1
UTGB	GTSSWA200670.02	outron	sac-1	F30A10.6	chrI	9488373	+	44	2.245	136	106	CE09807 | F30A10.6 | WBGene00009264 | WP:CE09807 | sac-1
UTGB	GTSSWA200671.01	outron	F30A10.9	F30A10.9	chrI	9505840	-	18	0	83	80	CE09810 | F30A10.9 | F30A10.9.1 | F30A10.9.2 | WBGene00009266 | WP:CE09810
UTGB	GTSSWA200672.01	outron	smn-1	C41G7.1b	chrI	9512152	-	15	0	62	59	C41G7.1 | C41G7.1a | C41G7.1b | CE08665 | CE27843 | SMN | WBGene00004887 | WP:CE08665 | WP:CE27843 | smn-1
UTGB	GTSSWA200673.05	exon	klp-16	C41G7.2	chrI	9512507	+	569	0.4286	10	-1	C41G7.2 | CE08666 | WBGene00002226 | WP:CE08666 | klp-16
UTGB	GTSSWA200674.01	outron	C41G7.3	C41G7.3	chrI	9518920	-	51	0.6048	231	194	C41G7.3 | CE42810 | WBGene00008061 | WP:CE42810
UTGB	GTSSWA200675.03	outron	set-32	C41G7.4	chrI	9519041	+	111	0.4016	585	194	C41G7.4 | CE42716 | WBGene00008062 | WP:CE42716 | set-32 | tag-328
UTGB	GTSSWA200676.01	exon	C41G7.6	C41G7.6	chrI	9527431	-	342	0.3921	60	-1	C41G7.6 | CE17540 | WBGene00008063 | WP:CE17540
UTGB	GTSSWA200677.01	outron	irx-1	C36F7.1	chrI	9540983	-	11	1.816	106	25	C36F7.1 | CE42075 | WBGene00007984 | WP:CE42075 | irx-1
UTGB	GTSSWA200678.01	outron	K07A1.1	K07A1.1	chrI	9583524	-	10	0	71	63	CE40418 | K07A1.1 | WBGene00010608 | WP:CE40418
UTGB	GTSSWA200680.02	outron	dut-1	K07A1.2.1	chrI	9585359	+	157	1.445	53	53	CE18855 | K07A1.2 | K07A1.2.1 | K07A1.2.2 | K07A1.2.3 | WBGene00010609 | WP:CE18855 | dut-1
UTGB	GTSSWA200681.01	exon	K07A1.3	K07A1.3	chrI	9588095	-	45	10.91	25	-1	CE41247 | K07A1.3 | WBGene00010610 | WP:CE41247
UTGB	GTSSWA200682.01	outron	ile-1	K07A1.8.1	chrI	9611590	-	13	1.015	66	64	CE11854 | K07A1.8 | K07A1.8.1 | K07A1.8.2 | WBGene00002070 | WP:CE11854 | ile-1
UTGB	GTSSWA200683.01	outron	nra-2	T05F1.1a	chrI	9620055	+	33	4.348	169	169	CE13267 | CE41012 | T05F1.1 | T05F1.1a | T05F1.1a.1 | T05F1.1a.2 | T05F1.1b | WBGene00011488 | WP:CE13267 | WP:CE41012 | nra-2
UTGB	GTSSWA200684.05	exon	T05F1.2	T05F1.2	chrI	9622596	+	477	4.484	17	-1	CE18929 | T05F1.2 | WBGene00011489 | WP:CE18929
UTGB	GTSSWA200685.02	outron	rps-19	T05F1.3.1	chrI	9625981	-	37	0	198	193	CE13265 | T05F1.3 | T05F1.3.1 | T05F1.3.2 | WBGene00004488 | WP:CE13265 | rpS19 | rps-19
UTGB	GTSSWA200686.01	outron	hsr-9	T05F1.6	chrI	9626142	+	21	0	124	90	CE36405 | T05F1.6 | WBGene00002027 | WP:CE36405 | hsr-9
UTGB	GTSSWA200687.02	outron	T05F1.4	T05F1.4	chrI	9630472	+	28	3.516	915	907	CE13261 | T05F1.4 | T05F1.4.1 | T05F1.4.2 | WBGene00011490 | WP:CE13261
UTGB	GTSSWA200688.01	outron	T05F1.5	T05F1.5	chrI	9635927	-	484	1.255	1089	1084	CE23949 | T05F1.5 | WBGene00011491 | WP:CE23949
UTGB	GTSSWA200689.01	exon	dhs-4	T05F1.10	chrI	9649206	-	10	2.968	29	-1	CE26900 | T05F1.10 | WBGene00000968 | WP:CE26900 | dhs-4
UTGB	GTSSWA200690.04	exon	lab-1	C03D6.6	chrI	9657815	-	572	0.4204	20	-1	C03D6.6 | CE15580 | WBGene00007278 | WP:CE15580 | lab-1
UTGB	GTSSWA200691.02	outron	npp-14	C03D6.4	chrI	9665125	-	19	0	221	219	C03D6.4 | CE05198 | CeNup214 | WBGene00003800 | WP:CE05198 | npp-14
UTGB	GTSSWA200692.02	exon	cel-1	C03D6.3a	chrI	9665242	+	75	9.598	59	-1	C03D6.3 | C03D6.3a | C03D6.3b | CE05197 | CE32300 | WBGene00000466 | WP:CE05197 | WP:CE32300 | cel-1
UTGB	GTSSWA200693.01	outron	C03D6.1	C03D6.1	chrI	9672036	-	17	1.918	1330	1319	C03D6.1 | CE05195 | WBGene00007275 | WP:CE05195
UTGB	GTSSWA200694.01	exon	ikb-1	C04F12.3	chrI	9685484	+	43	0	60	-1	C04F12.3 | CE19676 | WBGene00002069 | WP:CE19676 | ikb-1
UTGB	GTSSWA200695.01	outron	C04F12.5	C04F12.5	chrI	9691309	-	16	0	761	761	C04F12.5 | CE19678 | WBGene00007299 | WP:CE19678
UTGB	GTSSWA200696.01	exon	C04F12.7	C04F12.7	chrI	9696752	-	157	0.413	51	-1	C04F12.7 | CE19680 | WBGene00007301 | WP:CE19680
UTGB	GTSSWA200697.01	outron	rnh-1.3	C04F12.9	chrI	9710756	-	14	0	22	20	C04F12.9 | CE19682 | WBGene00007303 | WP:CE19682 | rnh-1.3
UTGB	GTSSWA200698.05	outron	C16C2.4	C16C2.4	chrI	9715528	-	12	0	316	307	C16C2.4 | C16C2.4.1 | C16C2.4.2 | C16C2.4.3 | CE15621 | WBGene00007621 | WP:CE15621
UTGB	GTSSWA200699.01	outron	eat-16	C16C2.2a.1	chrI	9722629	+	24	8.527	165	82	C16C2.2 | C16C2.2a | C16C2.2a.1 | C16C2.2a.2 | C16C2.2b | CE17404 | CE30491 | WBGene00001145 | WP:CE17404 | WP:CE30491 | eat-16 | sag-2
UTGB	GTSSWA200700.02	exon	K02A11.2	K02A11.2	chrI	9743653	+	28	9.766	579	-1	CE41675 | K02A11.2 | WBGene00010487 | WP:CE41675
UTGB	GTSSWA200701.01	outron	K02A11.3	K02A11.3	chrI	9747952	-	23	3.443	45	38	CE06057 | K02A11.3 | WBGene00010488 | WP:CE06057
UTGB	GTSSWA200702.03	exon	K02A11.4	K02A11.4	chrI	9749924	-	128	0.7376	17	-1	CE39024 | K02A11.4 | WBGene00044607 | WP:CE39024
UTGB	GTSSWA200703.01	outron	sur-6	F26E4.1	chrI	9752492	+	20	0	1736	1620	CE09685 | F26E4.1 | F26E4.1.1 | F26E4.1.2 | WBGene00006352 | WP:CE09685 | sur-6
UTGB	GTSSWA200704.01	exon	F26E4.3	F26E4.3.1	chrI	9767833	-	93	11.27	58	-1	CE42101 | F26E4.3 | F26E4.3.1 | F26E4.3.2 | WBGene00009158 | WP:CE42101
UTGB	GTSSWA200705.02	outron	F26E4.4	F26E4.4.1	chrI	9772624	-	20	6.535	73	68	CE09688 | F26E4.4 | F26E4.4.1 | F26E4.4.2 | F26E4.4.3 | WBGene00009159 | WP:CE09688
UTGB	GTSSWA200706.01	exon	F26E4.7	F26E4.7b	chrI	9774217	+	47	0.4724	53	-1	CE09691 | CE30520 | F26E4.7 | F26E4.7a | F26E4.7b | WBGene00009162 | WP:CE09691 | WP:CE30520
UTGB	GTSSWA200707.02	outron	F26E4.12	F26E4.12	chrI	9780320	+	15	0	19	19	CE09696 | F26E4.12 | WBGene00009165 | WP:CE09696
UTGB	GTSSWA200708.01	outron	tba-1	F26E4.8.1	chrI	9788596	-	17	0	1228	1215	CE09692 | F26E4.8 | F26E4.8.1 | F26E4.8.2 | TUBA3 | WBGene00006528 | WP:CE09692 | tba-1
UTGB	GTSSWA200709.01	outron	cco-1	F26E4.9.2	chrI	9786495	+	61	0	2504	2504	CE09693 | F26E4.9 | F26E4.9.1 | F26E4.9.2 | F26E4.9.3 | WBGene00000371 | WP:CE09693 | cco-1 | lpd-4
UTGB	GTSSWA200710.01	outron	hrdl-1	F26E4.11.1	chrI	9791062	+	12	0	2729	2684	CE09695 | F26E4.11 | F26E4.11.1 | F26E4.11.2 | WBGene00009164 | WP:CE09695 | hrdl-1
UTGB	GTSSWA200711.01	exon	nhr-49	K10C3.6c.1	chrI	9869692	+	21	0	16	-1	CE12084 | CE28943 | CE32693 | CE32694 | K10C3.6 | K10C3.6a | K10C3.6b | K10C3.6b.1 | K10C3.6b.2 | K10C3.6c | K10C3.6c.1 | K10C3.6c.2 | K10C3.6d | WBGene00003639 | WP:CE12084 | WP:CE28943 | WP:CE32693 | WP:CE32694 | nhr-49
UTGB	GTSSWA200712.02	exon	2013-10-01	F52F12.1a	chrI	9893435	-	17	0	1266	-1	CE29329 | CE41244 | F52F12.1 | F52F12.1a | F52F12.1b | F52F12.1b.1 | F52F12.1b.2 | WBGene00003842 | WP:CE29329 | WP:CE41244 | oct-1
UTGB	GTSSWA200713.01	exon	mom-4	F52F12.3	chrI	9900615	-	14	0.9452	25	-1	CE24994 | F52F12.3 | F52F12.3.1 | F52F12.3.2 | WBGene00003396 | WP:CE24994 | mom-4
UTGB	GTSSWA200714.01	outron	lsl-1	F52F12.4	chrI	9901176	+	93	1.453	93	93	CE36164 | F52F12.4 | WBGene00009937 | WP:CE36164 | lsl-1
UTGB	GTSSWA200715.01	outron	ztf-11	F52F12.6	chrI	9910628	-	13	0	110	92	CE24995 | F52F12.6 | WBGene00009939 | WP:CE24995 | ekl-2 | ztf-11
UTGB	GTSSWA200716.01	exon	F52F12.8	F52F12.8	chrI	9923604	+	37	0	48	-1	CE34876 | F52F12.8 | WBGene00009941 | WP:CE34876
UTGB	GTSSWA200717.02	exon	F52F12.7	F52F12.7	chrI	9928969	+	332	0.8962	750	-1	CE42711 | F52F12.7 | WBGene00009940 | WP:CE42711
UTGB	GTSSWA200718.01	exon	Y106G6A.4	Y106G6A.4	chrI	9930967	+	206	1.892	37	-1	CE41278 | WBGene00013696 | WP:CE41278 | Y106G6A.4
UTGB	GTSSWA200719.01	outron	Y106G6A.2	Y106G6A.2a	chrI	9934449	-	10	0	209	168	CE30567 | WBGene00013695 | WP:CE30567 | Y106G6A.2 | Y106G6A.2a | Y106G6A.2b
UTGB	GTSSWA200720.02	exon	sqv-5	T24D1.1b	chrI	9948071	+	34	4.562	122	-1	CE35027 | CE39182 | ChSy-S | T24D1.1 | T24D1.1a | T24D1.1a.1 | T24D1.1a.2 | T24D1.1b | WBGene00005023 | WP:CE35027 | WP:CE39182 | sqv-5
UTGB	GTSSWA200721.01	outron	T24D1.3	T24D1.3	chrI	9960160	-	17	0	86	75	CE14166 | T24D1.3 | WBGene00011986 | WP:CE14166
UTGB	GTSSWA200722.02	exon	tsp-7	T23D8.2	chrI	9973148	-	38	1.577	91	-1	CE26006 | T23D8.2 | WBGene00006633 | WP:CE26006 | tsp-7
UTGB	GTSSWA200723.01	outron	T23D8.3	T23D8.3	chrI	9976625	-	40	13.38	349	320	CE14052 | T23D8.3 | T23D8.3.1 | T23D8.3.2 | WBGene00011944 | WP:CE14052
UTGB	GTSSWA200724.02	outron	eif-3.C	T23D8.4.1	chrI	9979827	-	43	0.9791	177	175	CE18958 | T23D8.4 | T23D8.4.1 | T23D8.4.2 | WBGene00001226 | WP:CE18958 | eif-3.C
UTGB	GTSSWA200725.01	exon	his-67	T23D8.5	chrI	9988785	-	8164	1.785	32	-1	CE03252 | T23D8.5 | WBGene00001941 | WP:CE03252 | his-67
UTGB	GTSSWA200726.01	exon	his-68	T23D8.6	chrI	9989090	+	9105	2.314	31	-1	CE04501 | T23D8.6 | WBGene00001942 | WP:CE04501 | his-68
UTGB	GTSSWA200727.01	exon	F10G8.1	F10G8.1	chrI	10019632	+	57	0	63	-1	F10G8.1 | WBGene00008661
UTGB	GTSSWA200728.01	outron	npp-17	F10G8.3.1	chrI	10026130	+	18	0	503	502	CE09338 | CeRAE1 | F10G8.3 | F10G8.3.1 | F10G8.3.2 | WBGene00003803 | WP:CE09338 | npp-17
UTGB	GTSSWA200729.02	outron	ncs-2	F10G8.5	chrI	10036738	-	18	0	1970	1933	CE09340 | F10G8.5 | F10G8.5.1 | F10G8.5.2 | WBGene00003564 | WP:CE09340 | ncs-2
UTGB	GTSSWA200730.01	outron	scpl-1	B0379.4a	chrI	10104912	-	32	0	2995	2978	B0379.4 | B0379.4a | B0379.4b | B0379.4c | CE34243 | CE34244 | CE41191 | WBGene00007054 | WP:CE34243 | WP:CE34244 | WP:CE41191 | scpl-1 | tag-188
UTGB	GTSSWA200731.01	outron	Y106G6D.2	Y106G6D.2	chrI	10110864	+	11	0	129	106	CE19300 | WBGene00013699 | WP:CE19300 | Y106G6D.2
UTGB	GTSSWA200732.01	outron	Y106G6D.8	Y106G6D.8.1	chrI	10117117	+	17	1.941	39	31	CE36226 | WBGene00013704 | WP:CE36226 | Y106G6D.8 | Y106G6D.8.1 | Y106G6D.8.2
UTGB	GTSSWA200734.04	outron	Y106G6D.7	Y106G6D.7	chrI	10122242	+	112	1.64	266	208	CE24110 | WBGene00013703 | WP:CE24110 | Y106G6D.7
UTGB	GTSSWA200735.01	exon	F16C3.2	F16C3.2	chrI	10155107	-	44	1.722	69	-1	CE23665 | F16C3.2 | WBGene00008886 | WP:CE23665
UTGB	GTSSWA200736.01	exon	F16C3.3	F16C3.3	chrI	10155182	+	14	0	91	-1	CE36929 | F16C3.3 | WBGene00023415 | WP:CE36929
UTGB	GTSSWA200737.01	outron	C25A1.1	C25A1.1	chrI	10162069	+	31	19.51	309	301	C25A1.1 | CE08366 | WBGene00007705 | WP:CE08366
UTGB	GTSSWA200738.02	exon	clec-87	C25A1.8	chrI	10185452	-	900	0.3159	16	-1	C25A1.8 | CE08374 | WBGene00007709 | WP:CE08374 | clec-87 | cpg-5
UTGB	GTSSWA200739.03	exon	rsa-1	C25A1.9a	chrI	10185834	+	126	1.725	33	-1	C25A1.9 | C25A1.9a | C25A1.9b | CE08375 | CE18532 | WBGene00007710 | WP:CE08375 | WP:CE18532 | rsa-1
UTGB	GTSSWA200740.01	outron	dao-5	C25A1.10a	chrI	10190999	-	58	0.9527	129	113	C25A1.10 | C25A1.10a | C25A1.10b | CE08376 | CE38279 | WBGene00000931 | WP:CE08376 | WP:CE38279 | dao-5
UTGB	GTSSWA200741.02	outron	C25A1.12	C25A1.12	chrI	10192861	-	11	1.876	39	39	C25A1.12 | CE41871 | WBGene00007711 | WP:CE41871
UTGB	GTSSWA200742.01	exon	Y106G6E.1	Y106G6E.1	chrI	10200514	-	15	1.497	84	-1	CE20405 | WBGene00013705 | WP:CE20405 | Y106G6E.1
UTGB	GTSSWA200743.01	outron	ced-12	Y106G6E.5.1	chrI	10227419	-	13	0	457	457	CE27228 | WBGene00000426 | WP:CE27228 | Y106G6E.5 | Y106G6E.5.1 | Y106G6E.5.2 | ced-12 | mig-16
UTGB	GTSSWA200744.02	exon	wts-1	T20F10.1	chrI	10297879	-	19	0	42	-1	CE13844 | T20F10.1 | WBGene00007047 | WP:CE13844 | tag-181 | wts-1
UTGB	GTSSWA200745.01	exon	T20F10.2	T20F10.2a	chrI	10298195	+	12	0	104	-1	CE13846 | CE21191 | CE40125 | T20F10.2 | T20F10.2a | T20F10.2b | T20F10.2c | WBGene00011864 | WP:CE13846 | WP:CE21191 | WP:CE40125
UTGB	GTSSWA200746.03	exon	dlc-6	Y106G6G.3	chrI	10323545	+	22	0	61	-1	CE23213 | WBGene00013712 | WP:CE23213 | Y106G6G.3 | dlc-6
UTGB	GTSSWA200747.01	exon	Y106G6G.2	Y106G6G.2	chrI	10330525	-	19	0	2777	-1	CE35193 | WBGene00013711 | WP:CE35193 | Y106G6G.2
UTGB	GTSSWA200748.01	outron	rps-7	ZC434.2.1	chrI	10330646	+	95	0	233	223	CE06577 | WBGene00004476 | WP:CE06577 | ZC434.2 | ZC434.2.1 | ZC434.2.2 | rps-7
UTGB	GTSSWA200749.01	outron	ZC434.4	ZC434.4	chrI	10333111	-	12	0	61	58	CE38014 | WBGene00013892 | WP:CE38014 | ZC434.4 | ZC434.4.1 | ZC434.4.2
UTGB	GTSSWA200750.01	exon	ZC434.3	ZC434.3	chrI	10336914	-	13	0	1217	-1	CE06578 | WBGene00013891 | WP:CE06578 | ZC434.3
UTGB	GTSSWA200751.02	outron	ZC434.8	ZC434.8.1	chrI	10349849	-	12	4.442	539	495	CE06583 | WBGene00013894 | WP:CE06583 | ZC434.8 | ZC434.8.1 | ZC434.8.2
UTGB	GTSSWA200752.01	outron	ned-8	F45H11.2	chrI	10374281	-	14	0	431	428	CE10552 | F45H11.2 | WBGene00003587 | WP:CE10552 | ned-8
UTGB	GTSSWA200753.01	outron	F45H11.5	F45H11.5	chrI	10380745	+	26	2.518	327	327	CE27165 | F45H11.5 | WBGene00009745 | WP:CE27165
UTGB	GTSSWA200754.01	outron	tag-353	F25D7.2	chrI	10400835	+	16	0	226	222	CE40045 | F25D7.2 | WBGene00009112 | WP:CE40045 | tag-353
UTGB	GTSSWA200755.02	exon	Y106G6H.1	Y106G6H.1	chrI	10429675	+	83	0.4363	56	-1	CE20411 | WBGene00013716 | WP:CE20411 | Y106G6H.1
UTGB	GTSSWA200756.04	outron	pab-1	Y106G6H.2b	chrI	10435787	-	3873	2.688	565	558	CE20412 | CE36227 | CE36228 | WBGene00003902 | WP:CE20412 | WP:CE36227 | WP:CE36228 | Y106G6H.2 | Y106G6H.2a | Y106G6H.2a.1 | Y106G6H.2a.2 | Y106G6H.2a.3 | Y106G6H.2a.4 | Y106G6H.2a.5 | Y106G6H.2b | Y106G6H.2b.1 | Y106G6H.2b.2 | Y106G6H.2c | pab-1
UTGB	GTSSWA200757.02	outron	rpl-30	Y106G6H.3	chrI	10435902	+	249	0.8486	352	342	CE44850 | WBGene00004444 | WP:CE44850 | Y106G6H.3 | Y106G6H.3.1 | Y106G6H.3.2 | rpl-30
UTGB	GTSSWA200758.01	outron	Y106G6H.4	Y106G6H.4	chrI	10438240	-	18	18.42	540	529	CE20414 | WBGene00013717 | WP:CE20414 | Y106G6H.4
UTGB	GTSSWA200759.01	outron	Y106G6H.15	Y106G6H.15	chrI	10474743	-	23	0	317	316	CE20424 | WBGene00013725 | WP:CE20424 | Y106G6H.15
UTGB	GTSSWA200760.02	exon	Y106G6H.16	Y106G6H.16	chrI	10474846	+	29	0	58	-1	CE23216 | WBGene00013726 | WP:CE23216 | Y106G6H.16
UTGB	GTSSWA200761.01	outron	F37D6.3	F37D6.3	chrI	10486324	+	17	0	381	368	CE05820 | F37D6.3 | WBGene00009509 | WP:CE05820
UTGB	GTSSWA200762.01	exon	che-13	F59C6.7	chrI	10515518	-	11	0	22	-1	CE31704 | F59C6.7 | WBGene00000492 | WP:CE31704 | che-13 | che-9
UTGB	GTSSWA200763.01	exon	nlp-4	F59C6.6	chrI	10518034	-	15	2.699	303	-1	CE11466 | F59C6.6 | F59C6.6.1 | F59C6.6.2 | WBGene00003742 | WP:CE11466 | nlp-4
UTGB	GTSSWA200764.01	outron	exos-3	F59C6.4.1	chrI	10518160	+	10	0	210	208	CE11462 | F59C6.4 | F59C6.4.1 | F59C6.4.2 | WBGene00010325 | WP:CE11462 | exos-3
UTGB	GTSSWA200765.01	outron	F59C6.5	F59C6.5.1	chrI	10519303	+	14	0	47	46	CE11464 | F59C6.5 | F59C6.5.1 | F59C6.5.2 | WBGene00010326 | WP:CE11464
UTGB	GTSSWA200766.01	exon	F59C6.2	F59C6.2	chrI	10522100	+	19	0	41	-1	CE42129 | F59C6.2 | WBGene00010323 | WP:CE42129
UTGB	GTSSWA200767.02	outron	F59C6.11	F59C6.11	chrI	10532721	+	29	0.5333	67	56	CE27178 | F59C6.11 | WBGene00010328 | WP:CE27178
UTGB	GTSSWA200768.01	outron	F25H2.4	F25H2.4	chrI	10551682	+	10	0	286	286	CE09649 | F25H2.4 | WBGene00009118 | WP:CE09649
UTGB	GTSSWA200769.01	exon	F25H2.5	F25H2.5.1	chrI	10553844	-	6992	10.84	60	-1	CE09650 | F25H2.5 | F25H2.5.1 | F25H2.5.2 | F25H2.5.3 | WBGene00009119 | WP:CE09650
UTGB	GTSSWA200770.02	outron	F25H2.6	F25H2.6.2	chrI	10554001	+	47	0.4929	625	526	CE23681 | F25H2.6 | F25H2.6.1 | F25H2.6.2 | WBGene00009120 | WP:CE23681
UTGB	GTSSWA200771.03	outron	ubc-25	F25H2.8.1	chrI	10560306	+	18	2.499	2673	2653	CE34543 | F25H2.8 | F25H2.8.1 | F25H2.8.2 | WBGene00006720 | WP:CE34543 | ubc-25
UTGB	GTSSWA200772.01	outron	pas-5	F25H2.9	chrI	10565288	+	24	0.5646	1057	1051	CE09654 | F25H2.9 | F25H2.9.1 | F25H2.9.2 | WBGene00003926 | WP:CE09654 | pas-5 | syt-2
UTGB	GTSSWA200773.02	outron	rla-0	F25H2.10.1	chrI	10567721	+	185	1.31	202	162	CE09655 | F25H2.10 | F25H2.10.1 | F25H2.10.2 | WBGene00004408 | WP:CE09655 | rla-0 | rpa-0
UTGB	GTSSWA200774.01	exon	set-18	T22A3.4b	chrI	10590751	+	56	11.44	51	-1	CE13918 | CE32497 | T22A3.4 | T22A3.4a | T22A3.4b | WBGene00044070 | WP:CE13918 | WP:CE32497 | set-18 | tag-237
UTGB	GTSSWA200775.01	outron	pash-1	T22A3.5	chrI	10598662	+	143	1.22	37	33	CE18957 | T22A3.5 | WBGene00011908 | WP:CE18957 | pash-1
UTGB	GTSSWA200776.01	outron	eif-3.E	B0511.10	chrI	10642380	-	18	2.958	115	109	B0511.10 | B0511.10.1 | B0511.10.2 | CE17349 | WBGene00001228 | WP:CE17349 | eif-3.E
UTGB	GTSSWA200777.01	exon	fkb-7	B0511.1	chrI	10667886	+	20	1.829	62	-1	B0511.1 | CE26851 | WBGene00001432 | WP:CE26851 | fkb-7
UTGB	GTSSWA200778.01	exon	C34B2.4	C34B2.4	chrI	10672613	-	12	0.7557	34	-1	C34B2.4 | CE16892 | WBGene00016389 | WP:CE16892
UTGB	GTSSWA200779.01	exon	C34B2.3	C34B2.3	chrI	10672726	+	58	0	76	-1	C34B2.3 | CE34266 | WBGene00016388 | WP:CE34266
UTGB	GTSSWA200780.03	outron	C34B2.10.1	C34B2.10.1	chrI	10683111	-	77	1.185	81	73	C34B2.10 | C34B2.10.1 | C34B2.10.2 | CE16898 | WBGene00016395 | WP:CE16898 | phi-56
UTGB	GTSSWA200781.01	outron	sdha-2	C34B2.7.1	chrI	10685629	-	286	11.74	56	52	C34B2.7 | C34B2.7.1 | C34B2.7.2 | CE16895 | WBGene00016392 | WP:CE16895 | sdha-2
UTGB	GTSSWA200782.02	outron	kbp-5	C34B2.2	chrI	10687263	+	29	1.186	96	89	C34B2.2 | CE16890 | WBGene00016387 | WP:CE16890 | kbp-5
UTGB	GTSSWA200783.01	outron	B0205.14	B0205.14	chrI	10726892	+	17	0	15	12	B0205.14 | CE39200 | WBGene00044646 | WP:CE39200
UTGB	GTSSWA200784.02	exon	B0205.13	B0205.13	chrI	10728759	-	353	0.3427	47	-1	B0205.13 | CE39199 | WBGene00044644 | WP:CE39199
UTGB	GTSSWA200785.03	outron	B0205.8	B0205.8	chrI	10730240	-	181	1.206	32	17	B0205.8 | CE17322 | WBGene00015022 | WP:CE17322
UTGB	GTSSWA200786.01	outron	B0205.11	B0205.11	chrI	10733725	-	87	1.816	77	71	B0205.11 | CE39542 | WBGene00015025 | WP:CE39542
UTGB	GTSSWA200787.01	outron	kin-3	B0205.7	chrI	10733883	+	12	0	145	128	B0205.7 | CE17321 | WBGene00002191 | WP:CE17321 | kin-3
UTGB	GTSSWA200788.01	exon	C35E7.9	C35E7.9	chrI	10807000	+	18	1.008	53	-1	C35E7.9 | CE17522 | WBGene00016461 | WP:CE17522
UTGB	GTSSWA200789.03	exon	C35E7.10	C35E7.10a	chrI	10812851	-	51	0.6567	88	-1	C35E7.10 | C35E7.10a | C35E7.10b | CE17523 | CE17524 | WBGene00016462 | WP:CE17523 | WP:CE17524
UTGB	GTSSWA200790.01	exon	Y37F4.1	Y37F4.1	chrI	10858070	+	33	0	1471	-1	CE40824 | WBGene00021382 | WP:CE40824 | Y37F4.1
UTGB	GTSSWA200791.01	exon	T27C10.8	T27C10.8	chrI	10883594	+	33	0.6982	9	-1	CE42175 | T27C10.8 | WBGene00077519 | WP:CE42175
UTGB	GTSSWA200792.02	exon	F49D11.7	F49D11.7	chrI	10923932	-	293	0.5257	39	-1	CE17081 | F49D11.7 | WBGene00018631 | WP:CE17081
UTGB	GTSSWA200793.02	exon	clec-92	Y52B11A.5	chrI	11014333	+	26	0	1146	-1	CE20294 | WBGene00013125 | WP:CE20294 | Y52B11A.5 | clec-92
UTGB	GTSSWA200794.01	exon	clec-95	ZK39.2	chrI	11148965	+	11	0	10	-1	CE19313 | WBGene00013927 | WP:CE19313 | ZK39.2 | clec-95
UTGB	GTSSWA200795.01	exon	ZK39.10	ZK39.10	chrI	11159922	+	61	1.605	118	-1	CE41546 | WBGene00050881 | WP:CE41546 | ZK39.10
UTGB	GTSSWA200796.01	outron	rsr-1	F28D9.1	chrI	11182468	-	24	2.467	413	412	CE30346 | CeSRm160 | F28D9.1 | WBGene00004706 | WP:CE30346 | rsr-1
UTGB	GTSSWA200797.01	exon	F36D1.7	F36D1.7	chrI	11263146	+	44	2.877	25	-1	CE41237 | F36D1.7 | WBGene00009466 | WP:CE41237
UTGB	GTSSWA200798.01	exon	F36D1.4	F36D1.4	chrI	11271668	+	979	7.879	32	-1	CE18665 | F36D1.4 | WBGene00009463 | WP:CE18665
UTGB	GTSSWA200799.01	exon	Y53H1B.2	Y53H1B.2	chrI	11294189	-	39	1.349	44	-1	CE24431 | WBGene00013181 | WP:CE24431 | Y53H1B.2
UTGB	GTSSWA200800.01	outron	H25P06.1	H25P06.1.1	chrI	11323323	-	24	16.24	238	220	CE18823 | H25P06.1 | H25P06.1.1 | H25P06.1.2 | WBGene00010416 | WP:CE18823
UTGB	GTSSWA200801.01	exon	pes-2.2	F56G4.3	chrI	11359874	-	20	0	580	-1	CE18757 | F56G4.3 | WBGene00010158 | WP:CE18757 | pes-2 | pes-2.2
UTGB	GTSSWA200802.01	outron	F56G4.4	F56G4.4	chrI	11374504	+	14	0	112	110	CE18758 | F56G4.4 | WBGene00010159 | WP:CE18758
UTGB	GTSSWA200803.01	exon	C27C7.1	C27C7.1	chrI	11439140	+	10	2.548	161	-1	C27C7.1 | CE19705 | WBGene00007766 | WP:CE19705
UTGB	GTSSWA200804.01	exon	K08C9.1	K08C9.1	chrI	11486483	-	35	1.972	82	-1	CE18858 | K08C9.1 | WBGene00010650 | WP:CE18858
UTGB	GTSSWA200805.01	outron	col-65	K08C9.4	chrI	11490586	-	233	1.804	35	21	CE18860 | K08C9.4 | WBGene00000641 | WP:CE18860 | col-65
UTGB	GTSSWA200806.01	outron	F15D3.7	F15D3.7	chrI	11578404	+	13	0	231	227	CE15854 | F15D3.7 | F15D3.7.1 | F15D3.7.2 | WBGene00008857 | WP:CE15854
UTGB	GTSSWA200807.01	outron	C17D12.1	C17D12.1a	chrI	11609310	+	23	2.619	2386	2352	C17D12.1 | C17D12.1a | C17D12.1b | C17D12.1b.1 | C17D12.1b.2 | CE19697 | CE20517 | WBGene00007637 | WP:CE19697 | WP:CE20517
UTGB	GTSSWA200808.01	outron	oac-19	F35E2.6	chrI	11712417	-	13	0	229	229	CE17775 | F35E2.6 | WBGene00009413 | WP:CE17775 | oac-19
UTGB	GTSSWA200809.01	exon	F35E2.9	F35E2.9	chrI	11726272	-	12	0	19	-1	CE38343 | F35E2.9 | WBGene00009416 | WP:CE38343
UTGB	GTSSWA200810.02	exon	F35E2.5	F35E2.5	chrI	11743967	-	58	1.355	25	-1	CE17774 | F35E2.5 | WBGene00009412 | WP:CE17774
UTGB	GTSSWA200811.01	exon	Y47H9C.1	Y47H9C.1	chrI	11833191	-	27	0	34	-1	CE20262 | WBGene00012947 | WP:CE20262 | Y47H9C.1
UTGB	GTSSWA200812.01	outron	dnj-27	Y47H9C.5a	chrI	11877779	+	13	0	17	14	CE20265 | CE40162 | WBGene00001045 | WP:CE20265 | WP:CE40162 | Y47H9C.5 | Y47H9C.5a | Y47H9C.5b | dnj-27
UTGB	GTSSWA200813.07	outron	Y47H9C.8	Y47H9C.8	chrI	11893936	+	142	6.611	53	38	CE20268 | WBGene00012951 | WP:CE20268 | Y47H9C.8
UTGB	GTSSWA200814.01	exon	Y47H9C.12	Y47H9C.12	chrI	11896586	+	27	0.6746	105	-1	CE20272 | WBGene00012955 | WP:CE20272 | Y47H9C.12
UTGB	GTSSWA200815.01	exon	R09B3.2	R09B3.2	chrI	11910011	-	115	0.9825	46	-1	CE16307 | R09B3.2 | WBGene00011155 | WP:CE16307
UTGB	GTSSWA200816.03	exon	R09B3.3	R09B3.3	chrI	11910997	-	229	1.086	50	-1	CE16308 | R09B3.3 | WBGene00011156 | WP:CE16308
UTGB	GTSSWA200817.02	outron	ubc-12	R09B3.4	chrI	11911148	+	17	0.9707	169	168	CE16309 | R09B3.4 | WBGene00006707 | WP:CE16309 | ubc-12
UTGB	GTSSWA200818.01	outron	R06C1.4	R06C1.4	chrI	11930706	+	117	0.659	91	40	CE18119 | R06C1.4 | WBGene00011059 | WP:CE18119
UTGB	GTSSWA200819.01	exon	Y53C10A.10	Y53C10A.10	chrI	12020748	+	32	0	21	-1	CE41725 | WBGene00013138 | WP:CE41725 | Y53C10A.10
UTGB	GTSSWA200820.01	outron	F58D5.5	F58D5.5	chrI	12040086	+	16	5.941	1062	939	CE30547 | F58D5.5 | WBGene00010244 | WP:CE30547
UTGB	GTSSWA200821.02	exon	Y47H10A.5	Y47H10A.5	chrI	12097963	-	72	0	33	-1	CE22113 | WBGene00012961 | WP:CE22113 | Y47H10A.5
UTGB	GTSSWA200822.01	exon	M01G12.14	M01G12.14	chrI	12109476	-	11	0	1067	-1	CE27588 | M01G12.14 | WBGene00010825 | WP:CE27588
UTGB	GTSSWA200823.01	exon	F15H9.1	F15H9.1	chrI	12157113	+	23	0	28	-1	CE15857 | F15H9.1 | WBGene00008870 | WP:CE15857
UTGB	GTSSWA200824.01	outron	R05D7.1	R05D7.1	chrI	12163693	-	80	0.4247	181	169	CE32475 | R05D7.1 | WBGene00011026 | WP:CE32475
UTGB	GTSSWA200825.04	outron	R05D7.4	R05D7.4	chrI	12183200	-	87	1.237	41	17	CE18906 | R05D7.4 | WBGene00011029 | WP:CE18906
UTGB	GTSSWA200826.01	exon	C15C6.2	C15C6.2b	chrI	12203844	+	12	0	50	-1	C15C6.2 | C15C6.2a | C15C6.2b | CE18502 | CE18503 | WBGene00007601 | WP:CE18502 | WP:CE18503
UTGB	GTSSWA200827.02	outron	C15C6.3	C15C6.3	chrI	12206773	+	271	5.897	316	314	C15C6.3 | CE42064 | WBGene00007602 | WP:CE42064
UTGB	GTSSWA200828.01	outron	C15C6.4	C15C6.4	chrI	12212387	+	11	0	733	714	C15C6.4 | CE18505 | WBGene00007603 | WP:CE18505
UTGB	GTSSWA200829.01	exon	sdz-14	F14B6.1	chrI	12217753	-	10	3.632	36	-1	CE17663 | F14B6.1 | WBGene00008782 | WP:CE17663 | sdz-14
UTGB	GTSSWA200830.01	exon	F14B6.3	F14B6.3.1	chrI	12230523	+	116	16.45	48	-1	CE17665 | F14B6.3 | F14B6.3.1 | F14B6.3.2 | WBGene00008784 | WP:CE17665
UTGB	GTSSWA200831.01	exon	F14B6.6	F14B6.6a	chrI	12232640	+	60	0.466	62	-1	CE25856 | F14B6.6 | F14B6.6a | F14B6.6b | WBGene00008787 | WP:CE25856
UTGB	GTSSWA200832.01	exon	C47F8.1	C47F8.1	chrI	12335119	+	19	0.818	13	-1	C47F8.1 | CE17570 | WBGene00008157 | WP:CE17570
UTGB	GTSSWA200833.04	outron	E03H4.8	E03H4.8	chrI	12426752	-	54	1.347	271	247	CE09135 | E03H4.8 | WBGene00008476 | WP:CE09135
UTGB	GTSSWA200834.01	exon	clec-17	E03H4.10	chrI	12431463	-	44	0.605	21	-1	CE20647 | E03H4.10 | WBGene00008477 | WP:CE20647 | clec-17
UTGB	GTSSWA200835.03	outron	pars-2	T27F6.5a.1	chrI	12486973	+	69	0.4955	57	33	CE16514 | CE40133 | CE40134 | CE41029 | T27F6.5 | T27F6.5a | T27F6.5a.1 | T27F6.5a.2 | T27F6.5a.3 | T27F6.5b | T27F6.5c | T27F6.5d | WBGene00004190 | WP:CE16514 | WP:CE40133 | WP:CE40134 | WP:CE41029 | pars-2 | prs-2
UTGB	GTSSWA200836.01	exon	asah-1	K11D2.2	chrI	12505087	+	28	3.077	27	-1	CE12120 | K11D2.2 | K11D2.2.1 | K11D2.2.2 | WBGene00010769 | WP:CE12120 | asah-1 | dod-7
UTGB	GTSSWA200837.05	outron	W02D9.1.1	W02D9.1.1	chrI	12532154	-	171	1.834	37	29	CE24028 | CE45071 | W02D9.1 | W02D9.1.1 | W02D9.1.2 | W02D9.1a | W02D9.1a.1 | W02D9.1a.2 | W02D9.1b | W02D9.1b.1 | W02D9.1b.2 | WBGene00004181 | WP:CE24028 | WP:CE45071 | pri-2
UTGB	GTSSWA200838.01	outron	W02D9.10	W02D9.10	chrI	12551357	+	19	0	186	171	CE14472 | W02D9.10 | WBGene00012216 | WP:CE14472
UTGB	GTSSWA200839.01	exon	W02D9.7	W02D9.7	chrI	12559659	-	563	0.6096	11	-1	CE14466 | W02D9.7 | WBGene00012213 | WP:CE14466
UTGB	GTSSWA200840.02	outron	W02D9.6	W02D9.6	chrI	12560699	-	88	0.5313	37	35	CE14464 | W02D9.6 | WBGene00012212 | WP:CE14464
UTGB	GTSSWA200841.01	exon	W02D9.5	W02D9.5	chrI	12561549	-	57	0	11	-1	CE14462 | W02D9.5 | WBGene00012211 | WP:CE14462
UTGB	GTSSWA200842.02	exon	C49G9.2	C49G9.2	chrI	12562862	+	12	0	96	-1	C49G9.2 | CE41210 | WBGene00045474 | WP:CE41210
UTGB	GTSSWA200843.01	exon	H28O16.1	H28O16.1c	chrI	12652334	+	532	9.223	45	-1	CE18826 | CE34194 | CE34195 | CE36263 | H28O16.1 | H28O16.1a | H28O16.1b | H28O16.1c | H28O16.1d | H28O16.1d.1 | H28O16.1d.2 | H28O16.1d.3 | H28O16.1d.4 | H28O16.1d.5 | H28O16.1d.6 | WBGene00010419 | WP:CE18826 | WP:CE34194 | WP:CE34195 | WP:CE36263 | phi-37
UTGB	GTSSWA200844.02	outron	T26E3.7	T26E3.7	chrI	12656019	-	31	0	59	17	CE14196 | T26E3.7 | WBGene00012040 | WP:CE14196
UTGB	GTSSWA200845.01	exon	T26E3.4	T26E3.4	chrI	12665084	+	353	8.334	25	-1	CE24015 | T26E3.4 | WBGene00012037 | WP:CE24015
UTGB	GTSSWA200846.04	exon	T06G6.6	T06G6.6b	chrI	12718355	+	208	0.8477	16	-1	CE37143 | CE41260 | T06G6.6 | T06G6.6a | T06G6.6b | WBGene00011548 | WP:CE37143 | WP:CE41260
UTGB	GTSSWA200847.05	exon	pfd-3	T06G6.9	chrI	12728184	+	218	1.501	60	-1	CE13349 | T06G6.9 | WBGene00006889 | WP:CE13349 | pfd-3 | vbp-1
UTGB	GTSSWA200848.01	outron	W02A11.1	W02A11.1	chrI	12732742	-	13	0	55	30	CE18988 | W02A11.1 | WBGene00012192 | WP:CE18988
UTGB	GTSSWA200849.01	exon	vps-25	W02A11.2.1	chrI	12736634	-	12	0.7557	57	-1	CE24025 | W02A11.2 | W02A11.2.1 | W02A11.2.2 | WBGene00012193 | WP:CE24025 | vps-25
UTGB	GTSSWA200850.01	outron	bath-34	W02A11.5	chrI	12749362	+	20	0.6444	663	663	CE18992 | W02A11.5 | WBGene00012195 | WP:CE18992 | bath-34
UTGB	GTSSWA200851.01	outron	Y18D10A.1	Y18D10A.1	chrI	12806590	-	29	0.7528	54	19	CE21397 | WBGene00012474 | WP:CE21397 | Y18D10A.1
UTGB	GTSSWA200852.01	exon	nhx-8	Y18D10A.6a	chrI	12824876	+	38	1.496	905	-1	CE31092 | CE31093 | WBGene00003735 | WP:CE31092 | WP:CE31093 | Y18D10A.6 | Y18D10A.6a | Y18D10A.6b | Y18D10A.6b.1 | Y18D10A.6b.2 | nhx-8
UTGB	GTSSWA200853.01	exon	ptr-17	Y18D10A.7c	chrI	12833528	+	12	0	1126	-1	CE21403 | CE38115 | CE38116 | WBGene00004231 | WP:CE21403 | WP:CE38115 | WP:CE38116 | Y18D10A.7 | Y18D10A.7a | Y18D10A.7b | Y18D10A.7b.1 | Y18D10A.7b.2 | Y18D10A.7c | ptr-17
UTGB	GTSSWA200854.01	exon	clec-104	Y18D10A.10	chrI	12858862	+	10	0.9893	626	-1	CE21406 | WBGene00012480 | WP:CE21406 | Y18D10A.10 | clec-104
UTGB	GTSSWA200855.02	exon	Y18D10A.11	Y18D10A.11	chrI	12863482	-	860	0.7075	57	-1	CE21407 | WBGene00012481 | WP:CE21407 | Y18D10A.11
UTGB	GTSSWA200856.01	outron	car-1	Y18D10A.17	chrI	12902561	+	10	0.9893	1904	1898	CE21413 | WBGene00012484 | WP:CE21413 | Y18D10A.17 | Y18D10A.17.1 | Y18D10A.17.2 | car-1 | lsm-14
UTGB	GTSSWA200857.04	outron	fkb-2	Y18D10A.19.1	chrI	12918309	+	120	0.6078	406	401	CE21417 | WBGene00001427 | WP:CE21417 | Y18D10A.19 | Y18D10A.19.1 | Y18D10A.19.2 | fkb-2
UTGB	GTSSWA200858.01	exon	F08A8.2	F08A8.2	chrI	12942268	+	65	0.5305	28	-1	CE43421 | F08A8.2 | WBGene00008565 | WP:CE43421
UTGB	GTSSWA200859.01	outron	F08A8.4	F08A8.4.1	chrI	12951042	+	127	1.552	86	80	CE17636 | F08A8.4 | F08A8.4.1 | F08A8.4.2 | WBGene00008567 | WP:CE17636
UTGB	GTSSWA200860.03	outron	tba-2	C47B2.3.1	chrI	12966674	-	32	0.5465	422	414	Alpha-tubulin | C47B2.3 | C47B2.3.1 | C47B2.3.2 | C47B2.3.3 | CE17563 | TUBA4B | WBGene00006529 | WP:CE17563 | mel-45 | tba-2
UTGB	GTSSWA200861.01	outron	eif-6	C47B2.5.2	chrI	12968634	+	88	6.083	314	300	C47B2.5 | C47B2.5.1 | C47B2.5.2 | CE17565 | WBGene00001234 | WP:CE17565 | eif-6
UTGB	GTSSWA200862.02	exon	nlp-15	CC4.2	chrI	12988219	+	123	0.4177	44	-1	CC4.2 | CE36118 | WBGene00003753 | WP:CE36118 | nlp-15
UTGB	GTSSWA200863.01	exon	CC4.3.2	CC4.3.2	chrI	12995824	+	21	0	53	-1	CC4.3 | CC4.3.1 | CC4.3.2 | CE15742 | WBGene00004895 | WP:CE15742 | smu-1
UTGB	GTSSWA200864.01	outron	F22G12.6	F22G12.6	chrI	13161898	-	16	2.548	409	401	F22G12.6
UTGB	GTSSWA200865.01	exon	F17B5.8	F17B5.8	chrI	13191104	+	33	1.083	25	-1	CE41224 | F17B5.8 | WBGene00045458 | WP:CE41224
UTGB	GTSSWA200866.01	exon	ZK1225.4	ZK1225.4	chrI	13216214	-	102	0.432	19	-1	CE19343 | WBGene00014238 | WP:CE19343 | ZK1225.4
UTGB	GTSSWA200867.01	exon	ZK1225.5	ZK1225.5	chrI	13218855	-	84	1.548	21	-1	CE19344 | WBGene00014239 | WP:CE19344 | ZK1225.5
UTGB	GTSSWA200868.01	exon	ssp-31	ZK1225.6	chrI	13219074	+	78	1.822	55	-1	CE19345 | WBGene00006048 | WP:CE19345 | ZK1225.6 | ssp-31
UTGB	GTSSWA200869.01	exon	ZK1053.2	ZK1053.2	chrI	13232145	+	21	0	95	-1	CE15517 | WBGene00014197 | WP:CE15517 | ZK1053.2
UTGB	GTSSWA200870.01	exon	F44F1.4	F44F1.4	chrI	13265701	-	13	0	112	-1	CE42861 | F44F1.4 | WBGene00009696 | WP:CE42861
UTGB	GTSSWA200871.03	outron	M01E5.2	M01E5.2	chrI	13281435	-	37	2.63	1290	1271	CE12276 | M01E5.2 | WBGene00010805 | WP:CE12276
UTGB	GTSSWA200872.01	outron	top-1	M01E5.5b	chrI	13289942	+	17	0	2672	2560	CE12282 | CE12284 | M01E5.5 | M01E5.5a | M01E5.5b | WBGene00006595 | WP:CE12282 | WP:CE12284 | top-1
UTGB	GTSSWA200873.01	outron	sepa-1	M01E5.6	chrI	13301559	-	29	0	869	856	CE12286 | M01E5.6 | WBGene00010808 | WP:CE12286 | sepa-1
UTGB	GTSSWA200874.01	exon	gcy-35	T04D3.4	chrI	13324741	+	11	0	609	-1	CE34497 | T04D3.4 | WBGene00001555 | WP:CE34497 | gcy-35
UTGB	GTSSWA200875.01	outron	T04D3.5	T04D3.5.1	chrI	13330928	-	11	0	182	178	CE13161 | T04D3.5 | T04D3.5.1 | T04D3.5.2 | WBGene00011434 | WP:CE13161
UTGB	GTSSWA200876.01	outron	W08E3.2	W08E3.2	chrI	13337163	-	38	11.22	1036	1028	CE26028 | W08E3.2 | WBGene00012343 | WP:CE26028
UTGB	GTSSWA200877.01	exon	W08E3.4	W08E3.4	chrI	13338909	-	11	0.7963	32	-1	CE41273 | W08E3.4 | WBGene00012345 | WP:CE41273
UTGB	GTSSWA200878.01	outron	snr-2	W08E3.1	chrI	13339095	+	20	15.01	324	290	CE14704 | W08E3.1 | W08E3.1.1 | W08E3.1.2 | WBGene00004915 | WP:CE14704 | snr-2
UTGB	GTSSWA200879.04	exon	Y40B1A.1	Y40B1A.1	chrI	13343774	+	34	5.858	1575	-1	CE45062 | CE45388 | WBGene00012732 | WP:CE45062 | WP:CE45388 | Y40B1A.1 | Y40B1A.1a | Y40B1A.1b
UTGB	GTSSWA200880.01	exon	C01A2.5	C01A2.5	chrI	13384759	+	274	14.1	63	-1	C01A2.5 | CE07787 | WBGene00007217 | WP:CE07787
UTGB	GTSSWA200881.01	exon	W05H12.2	W05H12.2	chrI	13413160	-	21	0	292	-1	CE14660 | W05H12.2 | WBGene00012290 | WP:CE14660
UTGB	GTSSWA200882.02	outron	spr-5	Y40B1B.6.1	chrI	13437753	+	83	4.363	303	301	CE20240 | WBGene00005010 | WP:CE20240 | Y40B1B.6 | Y40B1B.6.1 | Y40B1B.6.2 | spr-5
UTGB	GTSSWA200883.01	exon	Y48G10A.6	Y48G10A.6	chrI	13451498	+	91	1.534	44	-1	CE35092 | WBGene00013023 | WP:CE35092 | Y48G10A.6
UTGB	GTSSWA200884.01	outron	Y48G10A.1	Y48G10A.1.1	chrI	13489555	+	27	3.375	25	20	CE25312 | WBGene00013018 | WP:CE25312 | Y48G10A.1 | Y48G10A.1.1 | Y48G10A.1.2
UTGB	GTSSWA200885.01	exon	Y87G2A.19	Y87G2A.19	chrI	13508879	+	162	1.021	57	-1	CE38471 | WBGene00044260 | WP:CE38471 | Y87G2A.19
UTGB	GTSSWA200886.01	outron	Y87G2A.18	Y87G2A.18	chrI	13514301	-	46	1.661	25	22	CE23124 | WBGene00013604 | WP:CE23124 | Y87G2A.18
UTGB	GTSSWA200887.01	outron	atg-4.1	Y87G2A.3	chrI	13542385	-	43	2.205	82	39	CE42796 | WBGene00013595 | WP:CE42796 | Y87G2A.3 | atg-4.1
UTGB	GTSSWA200888.01	exon	grd-15	Y87G2A.15	chrI	13564542	+	12	0.7557	15	-1	CE34232 | WBGene00001704 | WP:CE34232 | Y87G2A.15 | grd-15
UTGB	GTSSWA200889.02	exon	Y87G2A.8b.1	Y87G2A.8b.1	chrI	13576266	+	15	0	10	-1	CE24687 | CE36253 | WBGene00013597 | WP:CE24687 | WP:CE36253 | Y87G2A.8 | Y87G2A.8a | Y87G2A.8a.1 | Y87G2A.8a.2 | Y87G2A.8a.3 | Y87G2A.8a.4 | Y87G2A.8b | Y87G2A.8b.1 | Y87G2A.8b.2 | gpi-1
UTGB	GTSSWA200890.01	outron	ubc-14	Y87G2A.9	chrI	13581421	+	34	2.045	277	265	CE24688 | WBGene00006709 | WP:CE24688 | Y87G2A.9 | Y87G2A.9.1 | Y87G2A.9.2 | ubc-14
UTGB	GTSSWA200891.01	exon	ins-33	W09C5.4	chrI	13639299	-	109	0.4028	7	-1	CE20166 | W09C5.4 | WBGene00002116 | WP:CE20166 | ins-33
UTGB	GTSSWA200892.04	outron	rpl-31	W09C5.6a.1	chrI	13653859	-	40	0	186	176	CE20168 | CE20169 | W09C5.6 | W09C5.6a | W09C5.6a.1 | W09C5.6a.2 | W09C5.6b | W09C5.6b.1 | W09C5.6b.2 | W09C5.6b.3 | W09C5.6b.4 | W09C5.6b.5 | W09C5.6b.6 | WBGene00004445 | WP:CE20168 | WP:CE20169 | rpl-31
UTGB	GTSSWA200893.01	exon	W09C5.7	W09C5.7	chrI	13654041	+	127	16.52	181	-1	CE20170 | W09C5.7 | WBGene00012353 | WP:CE20170
UTGB	GTSSWA200894.01	outron	W09C5.8	W09C5.8.1	chrI	13659497	-	39	2.709	398	381	CE20171 | W09C5.8 | W09C5.8.1 | W09C5.8.2 | WBGene00012354 | WP:CE20171
UTGB	GTSSWA200895.02	outron	W04A4.5	W04A4.5	chrI	13663466	+	181	0.4082	58	52	CE25138 | W04A4.5 | WBGene00012234 | WP:CE25138
UTGB	GTSSWA200896.01	exon	W04A4.2	W04A4.2	chrI	13682124	+	149	0	285	-1	CE42178 | W04A4.2 | WBGene00012231 | WP:CE42178
UTGB	GTSSWA200897.01	outron	ndx-4	Y37H9A.6.2	chrI	13796100	-	10	0	1972	1960	CE20230 | WBGene00003581 | WP:CE20230 | Y37H9A.6 | Y37H9A.6.1 | Y37H9A.6.2 | ndx-4
UTGB	GTSSWA200898.01	exon	W04A8.1	W04A8.1	chrI	13840022	-	11	0	42	-1	CE16535 | CE42825 | W04A8.1 | W04A8.1a | W04A8.1b | WBGene00012236 | WP:CE16535 | WP:CE42825
UTGB	GTSSWA200899.01	exon	W04A8.4	W04A8.4	chrI	13843237	-	184	0.7644	625	-1	CE16538 | W04A8.4 | WBGene00012239 | WP:CE16538
UTGB	GTSSWA200900.01	outron	usp-3	Y71A12B.9	chrI	13952581	-	20	0	965	965	CE41289 | WBGene00013506 | WP:CE41289 | Y71A12B.9 | usp-3
UTGB	GTSSWA200901.03	outron	rps-6	Y71A12B.1	chrI	13951918	+	142	1.041	247	230	CE24592 | WBGene00004475 | WP:CE24592 | Y71A12B.1 | Y71A12B.1.1 | Y71A12B.1.2 | rps-6
UTGB	GTSSWA200902.01	outron	Y71A12B.12	Y71A12B.12a.1	chrI	14004403	+	31	0	193	50	CE35202 | CE36899 | WBGene00013509 | WP:CE35202 | WP:CE36899 | Y71A12B.12 | Y71A12B.12a | Y71A12B.12a.1 | Y71A12B.12a.2 | Y71A12B.12b
UTGB	GTSSWA200903.01	exon	ins-29	ZC334.10	chrI	14018772	+	71	2.459	23	-1	CE36060 | WBGene00002112 | WP:CE36060 | ZC334.10 | ins-29
UTGB	GTSSWA200904.01	exon	ins-24	ZC334.3	chrI	14031654	-	171	0.5614	12	-1	CE36062 | WBGene00002107 | WP:CE36062 | ZC334.3 | ins-24
UTGB	GTSSWA200905.01	exon	ins-30	ZC334.2	chrI	14036042	-	234	0.4317	14	-1	CE19308 | WBGene00002113 | WP:CE19308 | ZC334.2 | ins-30
UTGB	GTSSWA200906.01	exon	ins-26	ZC334.1	chrI	14037790	-	20	0.7387	37	-1	CE19307 | WBGene00002109 | WP:CE19307 | ZC334.1 | ins-26
UTGB	GTSSWA200907.01	outron	Y71A12C.2	Y71A12C.2	chrI	14048489	-	129	8.153	484	481	CE39303 | WBGene00013513 | WP:CE39303 | Y71A12C.2
UTGB	GTSSWA200908.02	outron	smd-1	F47G4.7.1	chrI	14051091	-	62	0.4788	820	444	CE18705 | F47G4.7 | F47G4.7.1 | F47G4.7.2 | WBGene00004875 | WP:CE18705 | samdc | smd-1
UTGB	GTSSWA200909.01	exon	clec-113	F47G4.1	chrI	14058896	-	341	0	2014	-1	CE18700 | F47G4.1 | WBGene00009822 | WP:CE18700 | clec-113
UTGB	GTSSWA200910.01	exon	gpdh-1	F47G4.3	chrI	14075823	+	14	7.792	41	-1	CE18701 | F47G4.3 | WBGene00009824 | WP:CE18701 | gpdh-1
UTGB	GTSSWA200911.01	outron	F47G4.2	F47G4.2	chrI	14082595	-	10	1.979	260	230	CE19875 | F47G4.2 | WBGene00009823 | WP:CE19875
UTGB	GTSSWA200912.01	outron	tfg-1	Y63D3A.5.1	chrI	14101264	+	33	0	770	770	CE20336 | WBGene00006565 | WP:CE20336 | Y63D3A.5 | Y63D3A.5.1 | Y63D3A.5.2 | tfg-1
UTGB	GTSSWA200913.01	outron	mys-2	K03D10.3	chrI	14118340	+	24	0	405	400	CE23850 | K03D10.3 | WBGene00010537 | WP:CE23850 | mys-2
UTGB	GTSSWA200914.01	exon	fipr-23	C37A5.4	chrI	14155244	-	10	2.178	1186	-1	C37A5.4 | CE17530 | WBGene00007990 | WP:CE17530 | fipr-23
UTGB	GTSSWA200915.01	exon	fipr-24	C37A5.8	chrI	14157599	+	158	0.4798	43	-1	C37A5.8 | C37A5.8.1 | C37A5.8.2 | CE17532 | WBGene00007992 | WP:CE17532 | fipr-24
UTGB	GTSSWA200916.01	outron	C37A5.1	C37A5.1.1	chrI	14161746	-	11	1.253	98	94	C37A5.1 | C37A5.1.1 | C37A5.1.2 | CE17528 | WBGene00007988 | WP:CE17528
UTGB	GTSSWA200917.01	outron	C37A5.7	C37A5.7.1	chrI	14161844	+	10	0	1701	1673	C37A5.7 | C37A5.7.1 | C37A5.7.2 | CE37488 | WBGene00007991 | WP:CE37488
UTGB	GTSSWA200918.01	outron	C49A1.10	C49A1.10	chrI	14245165	-	10	0	745	725	C49A1.10 | CE39236 | WBGene00008191 | WP:CE39236
UTGB	GTSSWA200919.01	outron	fbxb-67	F49B2.2	chrI	14297152	+	20	0.7387	124	122	CE16073 | F49B2.2 | WBGene00009862 | WP:CE16073 | fbxb-67
UTGB	GTSSWA200920.06	exon	Y105E8A.3	Y105E8A.3	chrI	14358537	+	350	3.767	111	-1	CE32233 | WBGene00013668 | WP:CE32233 | Y105E8A.3
UTGB	GTSSWA200921.01	exon	Y105E8A.10	Y105E8A.10a	chrI	14417534	+	20	18.5	650	-1	CE25174 | CE29831 | CE36895 | WBGene00013670 | WP:CE25174 | WP:CE29831 | WP:CE36895 | Y105E8A.10 | Y105E8A.10a | Y105E8A.10b | Y105E8A.10c | Y105E8A.10c.1 | Y105E8A.10c.2 | Y105E8A.10c.3
UTGB	GTSSWA200922.01	outron	ekl-4	Y105E8A.17b	chrI	14469406	+	35	0	87	87	CE29836 | CE41712 | WBGene00013676 | WP:CE29836 | WP:CE41712 | Y105E8A.17 | Y105E8A.17a | Y105E8A.17b | ekl-4
UTGB	GTSSWA200923.02	outron	Y105E8A.20.1	Y105E8A.20.1	chrI	14496539	-	210	1.018	1642	1299	CE34219 | CE42774 | WBGene00013678 | WP:CE34219 | WP:CE42774 | Y105E8A.20 | Y105E8A.20.1 | Y105E8A.20.2 | Y105E8A.20.3 | Y105E8A.20a | Y105E8A.20a.1 | Y105E8A.20a.2 | Y105E8A.20b
UTGB	GTSSWA200924.08	outron	Y105E8B.11	Y105E8B.11	chrI	14621347	-	105	1.621	726	723	CE24090 | WBGene00044265 | WP:CE24090 | Y105E8B.11
UTGB	GTSSWA200925.02	exon	lev-11	Y105E8B.1f	chrI	14631011	-	1457	0.8651	64	-1	CE28782 | CE29059 | CE29060 | CE31733 | CE36223 | CE36224 | WBGene00002978 | WP:CE28782 | WP:CE29059 | WP:CE29060 | WP:CE31733 | WP:CE36223 | WP:CE36224 | Y105E8B.1 | Y105E8B.1a | Y105E8B.1b | Y105E8B.1b.1 | Y105E8B.1b.2 | Y105E8B.1b.3 | Y105E8B.1b.4 | Y105E8B.1c | Y105E8B.1d | Y105E8B.1e | Y105E8B.1e.1 | Y105E8B.1e.2 | Y105E8B.1e.3 | Y105E8B.1f | lev-11 | tmy-1
UTGB	GTSSWA200926.01	outron	exoc-8	Y105E8B.2b.1	chrI	14642598	-	43	1.211	49	42	CE28785 | CE34105 | WBGene00013687 | WP:CE28785 | WP:CE34105 | Y105E8B.2 | Y105E8B.2a | Y105E8B.2b | Y105E8B.2b.1 | Y105E8B.2b.2 | exoc-8
UTGB	GTSSWA200927.04	outron	Y105E8B.5	Y105E8B.5	chrI	14657342	+	151	0.8343	41	17	CE24099 | WBGene00013690 | WP:CE24099 | Y105E8B.5
UTGB	GTSSWA200928.01	exon	Y54E5A.7	Y54E5A.7	chrI	14711098	+	18	1.349	74	-1	CE20318 | WBGene00013202 | WP:CE20318 | Y54E5A.7
UTGB	GTSSWA200929.02	exon	Y54E5A.8	Y54E5A.8a	chrI	14716572	+	14	4.255	145	-1	CE20319 | CE20320 | WBGene00013203 | WP:CE20319 | WP:CE20320 | Y54E5A.8 | Y54E5A.8a | Y54E5A.8b
UTGB	GTSSWA200930.01	outron	K05C4.2	K05C4.2.1	chrI	14721551	-	11	4.085	224	208	CE19970 | K05C4.2 | K05C4.2.1 | K05C4.2.2 | K05C4.2.3 | WBGene00010579 | WP:CE19970
UTGB	GTSSWA200931.01	outron	K05C4.9	K05C4.9	chrI	14732115	-	122	0	1408	1404	CE19977 | K05C4.9 | WBGene00010585 | WP:CE19977
UTGB	GTSSWA200932.03	outron	K05C4.7	K05C4.7	chrI	14737538	+	30	0.615	152	151	CE19975 | K05C4.7 | K05C4.7.1 | K05C4.7.2 | WBGene00010583 | WP:CE19975
UTGB	GTSSWA200933.01	exon	mtx-1	F39B2.11	chrI	14756401	-	89	12.97	37	-1	CE16016 | F39B2.11 | WBGene00009559 | WP:CE16016 | mtx-1
UTGB	GTSSWA200934.03	outron	F39B2.6.3	F39B2.6.3	chrI	14758498	+	29	5.37	1425	1419	CE16012 | F39B2.6 | F39B2.6.1 | F39B2.6.2 | F39B2.6.3 | WBGene00004495 | WP:CE16012 | rps-26
UTGB	GTSSWA200935.03	outron	F39B2.3	F39B2.3	chrI	14790027	-	46	1.419	557	553	CE16009 | F39B2.3 | WBGene00009554 | WP:CE16009
UTGB	GTSSWA200936.01	outron	Y54E5B.2	Y54E5B.2	chrI	14820246	-	28	1.201	36	32	CE19226 | WBGene00013204 | WP:CE19226 | Y54E5B.2
UTGB	GTSSWA200937.01	outron	let-49	Y54E5B.3b	chrI	14820374	+	10	3.552	37	25	CE19227 | CE28136 | WBGene00002324 | WP:CE19227 | WP:CE28136 | Y54E5B.3 | Y54E5B.3a | Y54E5B.3b | let-49 | mdt-7 | med-7
UTGB	GTSSWA200938.01	exon	F32A7.4	F32A7.4	chrI	14839896	+	94	4.315	23	-1	CE09845 | F32A7.4 | WBGene00009305 | WP:CE09845
UTGB	GTSSWA200939.05	exon	aex-5	F32A7.6	chrI	14856097	-	315	5.991	378	-1	CE28554 | F32A7.6 | WBGene00000088 | WP:CE28554 | aex-5 | kpc-3 | kpc-5
UTGB	GTSSWA200940.01	exon	unc-54	F11C3.3.1	chrI	14863516	-	894	6.002	78	-1	CE09349 | F11C3.3 | F11C3.3.1 | F11C3.3.2 | F11C3.3.3 | WBGene00006789 | WP:CE09349 | myo-4 | unc-54
UTGB	GTSSWA200941.01	outron	frm-1	ZK270.2a.2	chrI	14900319	-	15	0	2969	2964	CE34142 | CE34143 | CE34144 | CE34145 | WBGene00001488 | WP:CE34142 | WP:CE34143 | WP:CE34144 | WP:CE34145 | ZK270.2 | ZK270.2a | ZK270.2a.1 | ZK270.2a.2 | ZK270.2a.3 | ZK270.2b | ZK270.2d | ZK270.2e | frm-1
UTGB	GTSSWA200942.01	outron	F33H2.5	F33H2.5	chrI	15013977	-	32	1.09	115	87	CE17767 | F33H2.5 | WBGene00009368 | WP:CE17767
UTGB	GTSSWA200944.01	outron	F33H2.3	F33H2.3	chrI	15034130	+	11	0	389	374	CE17766 | F33H2.3 | WBGene00009367 | WP:CE17766
UTGB	GTSSWA200945.01	outron	F31C3.2	F31C3.2a	chrI	15036007	+	12	0	357	355	CE17731 | CE36143 | F31C3.2 | F31C3.2a | F31C3.2b | WBGene00009284 | WP:CE17731 | WP:CE36143
UTGB	GTSSWA200946.01	outron	cyn-5	F31C3.1.1	chrI	15041526	-	10	0	266	264	CE17730 | F31C3.1 | F31C3.1.1 | F31C3.1.2 | WBGene00000881 | WP:CE17730 | cyn-5 | cyp-5
UTGB	GTSSWA200947.01	exon	F31C3.3	F31C3.3	chrI	15050152	-	10	0	4	-1	CE42847 | F31C3.3 | WBGene00009285 | WP:CE42847
UTGB	GTSSWA200948.01	outron	F31C3.4	F31C3.4	chrI	15052573	-	10	0	165	165	CE17733 | F31C3.4 | WBGene00009286 | WP:CE17733
UTGB	GTSSWA200949.01	outron	F31C3.5	F31C3.5	chrI	15052939	+	25	0	73	65	CE17734 | F31C3.5 | WBGene00009287 | WP:CE17734
UTGB	GTSSWA200950.01	outron	C01B12.3	C01B12.3	chrII	12960	+	12	0	26	25	C01B12.3 | CE07791 | WBGene00015286 | WP:CE07791
UTGB	GTSSWA200951.01	exon	C01B12.8	C01B12.8	chrII	24695	+	22	1.578	76	-1	C01B12.8 | CE07796 | WBGene00015291 | WP:CE07796
UTGB	GTSSWA200952.01	outron	F23F1.4	F23F1.4	chrII	28406	-	15	0	126	125	CE41395 | F23F1.4 | WBGene00017745 | WP:CE41395
UTGB	GTSSWA200953.01	exon	fbxc-54	F23F1.3	chrII	31779	+	20	2.402	46	-1	CE31795 | F23F1.3 | WBGene00017744 | WP:CE31795 | fbxc-54
UTGB	GTSSWA200954.01	exon	F23F1.2	F23F1.2	chrII	34232	+	12	0	37	-1	CE41394 | F23F1.2 | WBGene00017743 | WP:CE41394
UTGB	GTSSWA200955.01	exon	F23F1.7	F23F1.7	chrII	39506	-	35	0	18	-1	CE29775 | F23F1.7 | WBGene00017748 | WP:CE29775
UTGB	GTSSWA200956.01	exon	nfyc-1	F23F1.1	chrII	43882	+	55	11.9	63	-1	CE27996 | F23F1.1 | WBGene00017742 | WP:CE27996 | nfyc-1
UTGB	GTSSWA200957.03	outron	sptl-1	C23H3.4a.2	chrII	51125	+	19	0	534	527	C23H3.4 | C23H3.4a | C23H3.4a.1 | C23H3.4a.2 | C23H3.4a.3 | C23H3.4b | C23H3.4b.1 | C23H3.4b.2 | CE08323 | CE37749 | WBGene00016020 | WP:CE08323 | WP:CE37749 | sptl-1
UTGB	GTSSWA200958.02	exon	C23H3.9	C23H3.9d	chrII	79995	-	59	0	2699	-1	C23H3.9 | C23H3.9a | C23H3.9b | C23H3.9c | C23H3.9d | CE32136 | CE32137 | CE35956 | CE36980 | WBGene00016022 | WP:CE32136 | WP:CE32137 | WP:CE35956 | WP:CE36980
UTGB	GTSSWA200959.01	outron	C50D2.5	C50D2.5	chrII	98330	+	20	0.6901	81	74	C50D2.5 | CE38492 | WBGene00016808 | WP:CE38492
UTGB	GTSSWA200960.01	outron	C50D2.10	C50D2.10	chrII	99832	+	17	0	31	18	C50D2.10 | C50D2.10.1 | C50D2.10.2 | CE38696 | WBGene00044420 | WP:CE38696
UTGB	GTSSWA200961.01	exon	C50D2.3	C50D2.3	chrII	106198	+	16	1.552	60	-1	C50D2.3 | CE08888 | WBGene00016807 | WP:CE08888
UTGB	GTSSWA200962.01	outron	T25D3.3	T25D3.3	chrII	152598	+	15	5.608	104	87	CE36021 | T25D3.3 | WBGene00020797 | WP:CE36021
UTGB	GTSSWA200963.01	exon	abu-11	T01D1.6	chrII	194558	-	12	0	23	-1	CE28071 | T01D1.6 | WBGene00000034 | WP:CE28071 | abu-11 | pqn-61
UTGB	GTSSWA200964.01	outron	F48A11.4	F48A11.4	chrII	217283	-	15	6.11	666	662	CE44892 | F48A11.4 | F48A11.4.1 | F48A11.4.2 | WBGene00018585 | WP:CE44892
UTGB	GTSSWA200965.01	outron	ubxn-3	F48A11.5b	chrII	221839	-	37	0.6664	1218	1198	CE10730 | CE37017 | F48A11.5 | F48A11.5a | F48A11.5b | WBGene00018586 | WP:CE10730 | WP:CE37017 | ubxn-3
UTGB	GTSSWA200966.01	outron	pqn-85	Y43H11AL.3	chrII	257228	-	12	0	2046	2034	CE36034 | WBGene00004166 | WP:CE36034 | Y43H11AL.3 | pqn-85
UTGB	GTSSWA200967.02	outron	B0432.7	B0432.7	chrII	275813	-	13	1.015	1920	1847	B0432.7 | CE42045 | WBGene00015188 | WP:CE42045
UTGB	GTSSWA200968.01	exon	clec-117	B0432.12	chrII	297021	-	87	0.5232	11	-1	B0432.12 | CE07750 | WBGene00015193 | WP:CE07750 | clec-117
UTGB	GTSSWA200969.01	outron	K01A2.5	K01A2.5	chrII	301277	+	16	0	1137	1127	CE19513 | K01A2.5 | WBGene00019280 | WP:CE19513
UTGB	GTSSWA200970.01	exon	col-69	K01A2.7	chrII	305537	-	39	0	7	-1	CE19515 | K01A2.7 | WBGene00000645 | WP:CE19515 | col-69
UTGB	GTSSWA200971.01	exon	sgcb-1	K01A2.1	chrII	326287	+	10	0	70	-1	CE35984 | K01A2.1 | WBGene00019277 | WP:CE35984 | sgcb-1
UTGB	GTSSWA200973.01	exon	C03H5.3	C03H5.3	chrII	386220	+	10	0	18	-1	C03H5.3 | CE07896 | WBGene00015405 | WP:CE07896
UTGB	GTSSWA200974.02	exon	clec-10	C03H5.1.1	chrII	402664	+	148	1.162	17	-1	C03H5.1 | C03H5.1.1 | C03H5.1.2 | CE32109 | WBGene00015403 | WP:CE32109 | clec-10
UTGB	GTSSWA200975.02	outron	C24H12.5	C24H12.5b	chrII	410987	-	19	0	68	59	C24H12.5 | C24H12.5a | C24H12.5b | CE08359 | CE27729 | WBGene00016074 | WP:CE08359 | WP:CE27729
UTGB	GTSSWA200976.01	outron	C24H12.4	C24H12.4a	chrII	411118	+	12	0	113	103	C24H12.4 | C24H12.4a | C24H12.4b | CE27728 | CE29675 | WBGene00016073 | WP:CE27728 | WP:CE29675
UTGB	GTSSWA200977.01	exon	C24H12.6	C24H12.6	chrII	418921	-	99	0	461	-1	C24H12.6 | CE34706 | WBGene00016075 | WP:CE34706
UTGB	GTSSWA200978.02	exon	C24H12.11	C24H12.11	chrII	429805	-	12	0	653	-1	C24H12.11 | CE08365 | WBGene00016080 | WP:CE08365
UTGB	GTSSWA200979.01	outron	nol-1	W07E6.1	chrII	476152	-	10	0	217	212	CE28259 | W07E6.1 | WBGene00021073 | WP:CE28259 | nol-1
UTGB	GTSSWA200980.02	exon	W07E6.5	W07E6.5	chrII	476287	+	14	0	267	-1	CE17297 | W07E6.5 | WBGene00021076 | WP:CE17297
UTGB	GTSSWA200981.01	outron	W07E6.2	W07E6.2	chrII	484414	-	13	0	36	28	CE17294 | W07E6.2 | W07E6.2.1 | W07E6.2.2 | WBGene00021074 | WP:CE17294
UTGB	GTSSWA200982.01	outron	prp-21	W07E6.4	chrII	484763	+	16	0	105	102	CE17296 | Ceprp21 | W07E6.4 | W07E6.4.1 | W07E6.4.2 | WBGene00004188 | WP:CE17296 | prp-21
UTGB	GTSSWA200983.01	exon	mab-9	T27A1.6	chrII	516015	+	23	2.007	140	-1	CE24016 | Ce-tbx-12 | T27A1.6 | WBGene00003106 | WP:CE24016 | mab-9 | tbx-12
UTGB	GTSSWA200984.02	exon	lgc-34	T27A1.4	chrII	526640	+	236	1.136	22	-1	CE14211 | T27A1.4 | T27A1.4.1 | T27A1.4.2 | WBGene00020836 | WP:CE14211 | lgc-34
UTGB	GTSSWA200985.03	exon	C09E8.3.1	C09E8.3.1	chrII	546754	+	28	0	75	-1	C09E8.3 | C09E8.3.1 | C09E8.3.2 | CE19349 | WBGene00015646 | WP:CE19349 | mlt-10
UTGB	GTSSWA200986.01	exon	W08F4.5	W08F4.5	chrII	569502	-	18	5.19	706	-1	CE14720 | W08F4.5 | WBGene00021094 | WP:CE14720
UTGB	GTSSWA200987.02	outron	W08F4.3	W08F4.3.1	chrII	580498	+	66	1.017	121	102	CE14716 | W08F4.3 | W08F4.3.1 | W08F4.3.2 | WBGene00021093 | WP:CE14716
UTGB	GTSSWA200988.01	exon	W08F4.13	W08F4.13	chrII	581840	+	13	2.402	2994	-1	CE39799 | W08F4.13 | WBGene00044733 | WP:CE39799
UTGB	GTSSWA200989.01	exon	W04H10.1	W04H10.1	chrII	609050	+	11	2.29	27	-1	CE14600 | W04H10.1 | WBGene00021030 | WP:CE14600
UTGB	GTSSWA200990.01	exon	K07E8.6	K07E8.6	chrII	639492	-	16	0	53	-1	CE41915 | K07E8.6 | WBGene00019497 | WP:CE41915
UTGB	GTSSWA200991.01	exon	K07E8.5	K07E8.5	chrII	650881	+	18	0	1119	-1	CE35992 | K07E8.5 | WBGene00019496 | WP:CE35992
UTGB	GTSSWA200992.01	exon	Y39F10B.1	Y39F10B.1a	chrII	723768	+	12	0	26	-1	CE42580 | CE42596 | WBGene00021456 | WP:CE42580 | WP:CE42596 | Y39F10B.1 | Y39F10B.1a | Y39F10B.1b
UTGB	GTSSWA200993.01	exon	fbxc-48	C08G5.2	chrII	740916	-	12	0	62	-1	C08G5.2 | CE34671 | WBGene00015615 | WP:CE34671 | fbxc-48
UTGB	GTSSWA200994.01	exon	Y39F10A.3	Y39F10A.3	chrII	783018	-	12	0	10	-1	CE21727 | WBGene00021454 | WP:CE21727 | Y39F10A.3
UTGB	GTSSWA200995.01	exon	F46F5.1	F46F5.1	chrII	794670	-	15	0	2681	-1	CE19418 | F46F5.1 | WBGene00018493 | WP:CE19418
UTGB	GTSSWA200996.02	exon	F46F5.6	F46F5.6	chrII	814872	-	249	0.4115	28	-1	CE19422 | F46F5.6 | WBGene00018497 | WP:CE19422
UTGB	GTSSWA200997.01	exon	F46F5.9	F46F5.9	chrII	822865	-	177	0.3744	28	-1	CE19425 | F46F5.9 | WBGene00018500 | WP:CE19425
UTGB	GTSSWA200998.01	exon	F28A10.1	F28A10.1	chrII	825815	+	23	0	378	-1	CE19406 | F28A10.1 | WBGene00017869 | WP:CE19406
UTGB	GTSSWA200999.01	exon	F28A10.10	F28A10.10	chrII	833097	-	127	1.822	1219	-1	CE19415 | F28A10.10 | WBGene00017878 | WP:CE19415
UTGB	GTSSWA201000.01	exon	F28A10.9	F28A10.9	chrII	837116	-	113	0.4127	1839	-1	CE39014 | F28A10.9 | WBGene00017877 | WP:CE39014
UTGB	GTSSWA201001.01	exon	F28A10.8	F28A10.8	chrII	839462	-	62	0	985	-1	CE19413 | F28A10.8 | WBGene00017876 | WP:CE19413
UTGB	GTSSWA201002.01	exon	F28A10.3	F28A10.3	chrII	840426	+	25	0	229	-1	CE29780 | F28A10.3 | WBGene00017871 | WP:CE29780
UTGB	GTSSWA201003.01	exon	F28A10.4	F28A10.4	chrII	844260	+	26	1.652	20	-1	CE19409 | F28A10.4 | WBGene00017872 | WP:CE19409
UTGB	GTSSWA201004.01	outron	acdh-9	F28A10.6	chrII	848680	-	52	0	73	70	CE19411 | F28A10.6 | WBGene00017874 | WP:CE19411 | acdh-9
UTGB	GTSSWA201005.01	exon	T07D3.6	T07D3.6	chrII	878602	+	14	14.82	2318	-1	CE36193 | T07D3.6 | WBGene00020309 | WP:CE36193
UTGB	GTSSWA201006.01	exon	fbxc-24	R07C3.11	chrII	909684	-	35	1.014	896	-1	CE12542 | R07C3.11 | WBGene00019927 | WP:CE12542 | fbxc-24
UTGB	GTSSWA201007.01	exon	fbxc-29	R07C3.7	chrII	916060	+	31	0.5797	26	-1	CE40771 | R07C3.7 | WBGene00019923 | WP:CE40771 | fbxc-29
UTGB	GTSSWA201008.01	exon	clec-44	R07C3.12	chrII	925465	-	21	0	2756	-1	CE39171 | R07C3.12 | WBGene00019928 | WP:CE39171 | clec-44
UTGB	GTSSWA201009.01	exon	fbxc-34	R07C3.5	chrII	928742	+	67	0	2448	-1	CE41923 | R07C3.5 | WBGene00019921 | WP:CE41923 | fbxc-34
UTGB	GTSSWA201010.01	exon	clec-43	R07C3.1	chrII	944063	+	17	0.7507	9	-1	CE38627 | R07C3.1 | WBGene00019917 | WP:CE38627 | clec-43
UTGB	GTSSWA201011.01	exon	fbxc-18	C32B5.14	chrII	966993	-	16	0	27	-1	C32B5.14 | CE08522 | WBGene00016307 | WP:CE08522 | fbxc-18
UTGB	GTSSWA201012.01	exon	fbxc-14	C32B5.5	chrII	974293	+	23	2.324	16	-1	C32B5.5 | CE34725 | WBGene00016298 | WP:CE34725 | fbxc-14
UTGB	GTSSWA201013.01	exon	fbxc-39	F45D11.10	chrII	988894	+	20	3.957	7	-1	CE40256 | F45D11.10 | WBGene00018456 | WP:CE40256 | fbxc-39
UTGB	GTSSWA201014.01	exon	fbxc-42	F45D11.9	chrII	991640	+	11	0	66	-1	CE43758 | F45D11.9 | WBGene00018455 | WP:CE43758 | fbxc-42
UTGB	GTSSWA201015.01	exon	fbxb-41	M01D1.8	chrII	1042330	-	35	0	21	-1	CE12256 | M01D1.8 | WBGene00019703 | WP:CE12256 | fbxb-41
UTGB	GTSSWA201016.01	outron	pho-14	T13B5.3	chrII	1100898	-	65	0	79	72	CE13607 | T13B5.3 | WBGene00020471 | WP:CE13607 | pho-14
UTGB	GTSSWA201017.01	outron	sut-1	T13B5.8b	chrII	1123341	-	28	6.88	81	75	CE13617 | CE36017 | T13B5.8 | T13B5.8a | T13B5.8b | WBGene00020475 | WP:CE13617 | WP:CE36017 | sut-1
UTGB	GTSSWA201018.01	outron	taf-6.1	W09B6.2	chrII	1127955	+	18	1.11	43	27	CE27222 | W09B6.2 | WBGene00006387 | WP:CE27222 | taf-6.1
UTGB	GTSSWA201019.01	outron	pod-2	W09B6.1b	chrII	1140975	+	11	2.29	2967	2939	CE14734 | CE36026 | W09B6.1 | W09B6.1a | W09B6.1a.1 | W09B6.1a.2 | W09B6.1b | W09B6.1b.1 | W09B6.1b.2 | WBGene00004076 | WP:CE14734 | WP:CE36026 | phi-47 | pod-2
UTGB	GTSSWA201020.01	exon	T23F4.3	T23F4.3	chrII	1172114	-	53	0	23	-1	CE14088 | T23F4.3 | WBGene00020741 | WP:CE14088
UTGB	GTSSWA201021.02	exon	Y57G7A.5	Y57G7A.5	chrII	1275541	-	43	0.5855	43	-1	CE19634 | WBGene00021968 | WP:CE19634 | Y57G7A.5
UTGB	GTSSWA201022.03	exon	Y57G7A.6	Y57G7A.6	chrII	1285575	-	648	0.3845	54	-1	CE19635 | WBGene00021969 | WP:CE19635 | Y57G7A.6
UTGB	GTSSWA201023.01	outron	Y57G7A.10	Y57G7A.10a	chrII	1306704	-	15	0.7045	578	561	CE19639 | WBGene00021973 | WP:CE19639 | Y57G7A.10 | Y57G7A.10a
UTGB	GTSSWA201024.01	outron	F56D12.6	F56D12.6a	chrII	1310360	+	15	0	226	163	CE11256 | CE23782 | F56D12.6 | F56D12.6a | F56D12.6b | WBGene00018974 | WP:CE11256 | WP:CE23782
UTGB	GTSSWA201026.01	exon	Y51H7C.8	Y51H7C.8	chrII	1401803	+	64	1.351	31	-1	CE22362 | WBGene00021786 | WP:CE22362 | Y51H7C.8
UTGB	GTSSWA201027.01	outron	cogc-4	Y51H7C.6a.2	chrII	1403094	+	40	5.525	523	233	CE26151 | CE26152 | CE39055 | WBGene00021784 | WP:CE26151 | WP:CE26152 | WP:CE39055 | Y51H7C.6 | Y51H7C.6a | Y51H7C.6a.1 | Y51H7C.6a.2 | Y51H7C.6a.3 | Y51H7C.6b | Y51H7C.6c | cogc-4
UTGB	GTSSWA201028.01	exon	Y51H7C.10	Y51H7C.10	chrII	1423691	-	10	0	16	-1	CE36039 | WBGene00021788 | WP:CE36039 | Y51H7C.10
UTGB	GTSSWA201029.02	exon	Y51H7BR.7	Y51H7BR.7	chrII	1525475	-	14	1.524	62	-1	CE44058 | WBGene00021778 | WP:CE44058 | Y51H7BR.7
UTGB	GTSSWA201030.01	exon	fbxb-43	Y51H7BR.2	chrII	1536243	+	10	0	22	-1	CE22356 | WBGene00021774 | WP:CE22356 | Y51H7BR.2 | fbxb-43
UTGB	GTSSWA201031.01	exon	fbxb-42	Y51H7BR.1	chrII	1537605	+	19	0	22	-1	CE24414 | WBGene00021773 | WP:CE24414 | Y51H7BR.1 | fbxb-42
UTGB	GTSSWA201032.01	exon	fbxb-44	K05F6.5	chrII	1538875	+	68	0.4377	22	-1	CE39513 | K05F6.5 | WBGene00019416 | WP:CE39513 | fbxb-44
UTGB	GTSSWA201033.01	exon	K05F6.11	K05F6.11	chrII	1540934	+	24	0	216	-1	CE42662 | K05F6.11 | WBGene00044697 | WP:CE42662
UTGB	GTSSWA201034.01	exon	fbxb-52	K05F6.6	chrII	1550598	-	14	0.6969	639	-1	CE17164 | K05F6.6 | WBGene00019417 | WP:CE17164 | fbxb-52
UTGB	GTSSWA201035.01	exon	fbxb-54	K05F6.7	chrII	1559125	-	38	0	2811	-1	CE28588 | K05F6.7 | WBGene00019418 | WP:CE28588 | fbxb-54
UTGB	GTSSWA201036.01	exon	bath-46	T07H3.2	chrII	1597894	+	14	0	140	-1	CE44033 | T07H3.2 | WBGene00020325 | WP:CE44033 | bath-46
UTGB	GTSSWA201037.01	exon	bath-47	T07H3.1	chrII	1601797	+	37	0	40	-1	CE44962 | T07H3.1 | WBGene00006464 | WP:CE44962 | bath-47 | tag-113
UTGB	GTSSWA201038.01	exon	fbxb-20	ZC204.9	chrII	1650195	-	18	0	22	-1	CE15100 | WBGene00022559 | WP:CE15100 | ZC204.9 | fbxb-20
UTGB	GTSSWA201039.01	exon	btb-12	ZC204.3	chrII	1655064	+	43	1.574	156	-1	CE36349 | WBGene00022555 | WP:CE36349 | ZC204.3 | btb-12
UTGB	GTSSWA201040.01	exon	fbxb-17	F58E1.5	chrII	1676393	+	18	2.499	26	-1	CE11380 | F58E1.5 | WBGene00019037 | WP:CE11380 | fbxb-17
UTGB	GTSSWA201041.01	exon	fbxb-26	F58E1.3	chrII	1682523	+	23	0	19	-1	CE11376 | F58E1.3 | F58E1.3.1 | F58E1.3.2 | WBGene00019035 | WP:CE11376 | fbxb-26
UTGB	GTSSWA201042.01	exon	fbxb-47	F58E1.14	chrII	1703481	-	25	1.672	14	-1	CE11398 | F58E1.14 | WBGene00019045 | WP:CE11398 | fbxb-47
UTGB	GTSSWA201043.02	exon	sdz-18	F45C12.11	chrII	1706506	-	28	0	26	-1	CE10456 | F45C12.11 | WBGene00018442 | WP:CE10456 | bath-32 | sdz-18
UTGB	GTSSWA201044.01	outron	btb-6	F45C12.7	chrII	1715224	+	24	1.694	108	82	CE10448 | F45C12.7 | WBGene00018438 | WP:CE10448 | btb-6
UTGB	GTSSWA201045.01	exon	fbxb-5	F45C12.14	chrII	1723867	-	53	0	1446	-1	CE36850 | F45C12.14 | WBGene00018445 | WP:CE36850 | fbxb-5
UTGB	GTSSWA201046.01	exon	F45C12.2	F45C12.2	chrII	1732228	+	13	0	51	-1	CE35932 | F45C12.2 | WBGene00018433 | WP:CE35932
UTGB	GTSSWA201047.01	outron	F45C12.15	F45C12.15.2	chrII	1736468	-	42	0.6746	41	21	CE10464 | F45C12.15 | F45C12.15.1 | F45C12.15.2 | F45C12.15.3 | WBGene00018446 | WP:CE10464
UTGB	GTSSWA201048.01	exon	fbxb-12	F36H5.11	chrII	1756194	-	10	0	26	-1	CE29041 | F36H5.11 | WBGene00018109 | WP:CE29041 | fbxb-12
UTGB	GTSSWA201049.02	outron	math-4	C08F1.5a	chrII	1782381	-	50	2.879	70	57	C08F1.5 | C08F1.5a | C08F1.5b | CE31772 | CE39130 | WBGene00015609 | WP:CE31772 | WP:CE39130 | math-4
UTGB	GTSSWA201050.01	exon	C08F1.10	C08F1.10	chrII	1786308	-	26	0	39	-1	C08F1.10 | CE31770 | WBGene00015613 | WP:CE31770
UTGB	GTSSWA201051.01	exon	fbxa-3	T08E11.7	chrII	1820013	-	10	3.433	7	-1	CE39399 | T08E11.7 | WBGene00020363 | WP:CE39399 | fbxa-3
UTGB	GTSSWA201052.01	exon	fbxb-96	C52E2.7	chrII	1850415	-	12	0	14	-1	C52E2.7 | CE25831 | WBGene00016886 | WP:CE25831 | fbxb-96
UTGB	GTSSWA201053.01	exon	math-30	F52C6.5	chrII	1907476	+	13	0	687	-1	CE10810 | F52C6.5 | WBGene00018662 | WP:CE10810 | math-30
UTGB	GTSSWA201054.01	outron	bath-7	F52C6.10	chrII	1921242	-	10	0	135	123	CE10820 | F52C6.10 | WBGene00018667 | WP:CE10820 | bath-7
UTGB	GTSSWA201055.01	exon	T16A1.5	T16A1.5	chrII	2084140	-	18	1.411	312	-1	CE32723 | T16A1.5 | WBGene00020536 | WP:CE32723
UTGB	GTSSWA201056.01	exon	C40A11.10	C40A11.10	chrII	2137327	-	17	0	25	-1	C40A11.10 | C40A11.10.1 | C40A11.10.2 | CE27839 | WBGene00016553 | WP:CE27839
UTGB	GTSSWA201057.01	exon	C40A11.7	C40A11.7	chrII	2150331	-	10	0	19	-1	C40A11.7 | CE19370 | WBGene00016550 | WP:CE19370
UTGB	GTSSWA201058.01	outron	math-18	C40A11.1	chrII	2152694	+	13	0	1319	1315	C40A11.1 | CE41364 | WBGene00016544 | WP:CE41364 | math-18
UTGB	GTSSWA201059.01	exon	C33C12.3	C33C12.3a	chrII	2176891	+	26	0.6173	57	-1	C33C12.3 | C33C12.3a | C33C12.3b | C33C12.3b.1 | C33C12.3b.2 | CE29208 | CE39682 | WBGene00016335 | WP:CE29208 | WP:CE39682
UTGB	GTSSWA201060.01	exon	F54A3.4	F54A3.4	chrII	2223568	-	13	0	26	-1	CE20851 | F54A3.4 | WBGene00018783 | WP:CE20851
UTGB	GTSSWA201061.01	outron	F54A3.6	F54A3.6	chrII	2232453	-	110	0.8272	120	107	CE25902 | F54A3.6 | WBGene00018785 | WP:CE25902
UTGB	GTSSWA201062.01	outron	F54A3.2	F54A3.2	chrII	2243112	+	28	2.738	544	544	CE44847 | F54A3.2 | WBGene00018781 | WP:CE44847
UTGB	GTSSWA201063.01	exon	K09F6.3	K09F6.3	chrII	2255154	+	24	0	1153	-1	CE41429 | K09F6.3 | WBGene00019586 | WP:CE41429
UTGB	GTSSWA201064.01	exon	K09F6.4	K09F6.4	chrII	2265748	-	10	0	311	-1	CE12030 | K09F6.4 | WBGene00019587 | WP:CE12030
UTGB	GTSSWA201065.01	exon	K09F6.9	K09F6.9	chrII	2283292	-	11	0.9082	591	-1	CE31565 | K09F6.9 | WBGene00019592 | WP:CE31565
UTGB	GTSSWA201066.01	outron	B0281.5	B0281.5a	chrII	2300945	-	46	1.004	125	106	B0281.5 | B0281.5a | B0281.5b | CE07716 | CE41547 | WBGene00015112 | WP:CE07716 | WP:CE41547
UTGB	GTSSWA201067.01	exon	ZK1240.3	ZK1240.3	chrII	2320331	+	78	0	103	-1	CE33496 | WBGene00022868 | WP:CE33496 | ZK1240.3
UTGB	GTSSWA201068.01	exon	ZK1240.2	ZK1240.2	chrII	2323395	+	10	0	18	-1	CE33495 | WBGene00022867 | WP:CE33495 | ZK1240.2
UTGB	GTSSWA201069.03	exon	F43C11.7	F43C11.7	chrII	2335885	+	323	0.6959	53	-1	CE23722 | F43C11.7 | WBGene00018384 | WP:CE23722
UTGB	GTSSWA201070.02	exon	F43C11.3	F43C11.3	chrII	2353316	+	302	0.9959	23	-1	CE20783 | F43C11.3 | WBGene00018380 | WP:CE20783
UTGB	GTSSWA201071.01	outron	K02F6.7	K02F6.7	chrII	2529315	-	11	0.7963	69	67	CE36182 | K02F6.7 | WBGene00019341 | WP:CE36182
UTGB	GTSSWA201072.01	exon	K02F6.3	K02F6.3	chrII	2546237	+	20	0	53	-1	CE36874 | K02F6.3 | WBGene00019337 | WP:CE36874
UTGB	GTSSWA201073.02	exon	F33H12.7	F33H12.7	chrII	2586912	-	26	0	46	-1	CE41129 | F33H12.7 | WBGene00045457 | WP:CE41129
UTGB	GTSSWA201074.01	exon	gcy-21	F22E5.3	chrII	2659652	+	24	0.637	19	-1	CE09555 | F22E5.3 | WBGene00001546 | WP:CE09555 | gcy-21
UTGB	GTSSWA201075.01	exon	F22E5.20	F22E5.20	chrII	2673619	-	14	3.397	31	-1	CE33623 | F22E5.20 | WBGene00017713 | WP:CE33623
UTGB	GTSSWA201076.01	exon	F22E5.17	F22E5.17	chrII	2678048	+	97	2.909	18	-1	CE44943 | F22E5.17 | WBGene00017712 | WP:CE44943
UTGB	GTSSWA201077.01	exon	F34D6.1	F34D6.1	chrII	2681798	-	27	1.419	579	-1	CE28866 | F34D6.1 | WBGene00018021 | WP:CE28866
UTGB	GTSSWA201078.01	outron	F29A7.6	F29A7.6	chrII	2752705	-	10	0	96	93	2D42 | CE09777 | F29A7.6 | F29A7.6.1 | F29A7.6.2 | WBGene00017916 | WP:CE09777
UTGB	GTSSWA201079.01	exon	fbxb-108	F08D12.6	chrII	2764949	+	12	0.7557	20	-1	CE27926 | F08D12.6 | WBGene00017249 | WP:CE27926 | fbxb-108
UTGB	GTSSWA201080.01	outron	F08D12.1	F08D12.1	chrII	2787399	+	14	0	83	82	CE41557 | F08D12.1 | WBGene00017245 | WP:CE41557
UTGB	GTSSWA201081.01	exon	fut-4	K12H6.3	chrII	2822491	-	181	1.461	15	-1	CE31970 | K12H6.3 | WBGene00001507 | WP:CE31970 | ceft-5 | ft4 | fut-4 | tag-20
UTGB	GTSSWA201082.01	exon	Y110A2AL.4	Y110A2AL.4a	chrII	2839303	+	202	2.238	185	-1	CE33472 | CE33473 | WBGene00022441 | WP:CE33472 | WP:CE33473 | Y110A2AL.4 | Y110A2AL.4a | Y110A2AL.4b
UTGB	GTSSWA201083.01	exon	Y110A2AL.9	Y110A2AL.9	chrII	2866652	-	203	1.735	21	-1	CE41714 | WBGene00022445 | WP:CE41714 | Y110A2AL.9
UTGB	GTSSWA201084.03	outron	sqv-2	Y110A2AL.14.1	chrII	2895020	-	21	3.102	642	627	CE25190 | WBGene00005020 | WP:CE25190 | Y110A2AL.14 | Y110A2AL.14.1 | Y110A2AL.14.2 | sqv-2
UTGB	GTSSWA201085.02	exon	Y110A2AR.3	Y110A2AR.3a	chrII	2919203	-	33	0	54	-1	CE25196 | CE33475 | WBGene00022453 | WP:CE25196 | WP:CE33475 | Y110A2AR.3 | Y110A2AR.3a | Y110A2AR.3b
UTGB	GTSSWA201086.01	outron	Y110A2AR.1	Y110A2AR.1	chrII	2919708	+	161	0.8924	69	51	CE24116 | WBGene00022452 | WP:CE24116 | Y110A2AR.1
UTGB	GTSSWA201087.01	outron	ZK355.2	ZK355.2a.1	chrII	2923896	+	10	0	37	18	CE44898 | CE45018 | WBGene00022712 | WP:CE44898 | WP:CE45018 | ZK355.2 | ZK355.2a | ZK355.2a.1 | ZK355.2a.2 | ZK355.2b
UTGB	GTSSWA201088.02	outron	nhr-88	K08A2.5a.3	chrII	2975846	+	31	0	2574	2565	CE29513 | CE33143 | K08A2.5 | K08A2.5a | K08A2.5a.1 | K08A2.5a.2 | K08A2.5a.3 | K08A2.5b | K08A2.5b.1 | K08A2.5b.2 | K08A2.5c | K08A2.5c.1 | K08A2.5c.2 | WBGene00003678 | WP:CE29513 | WP:CE33143 | nhr-88
UTGB	GTSSWA201089.01	outron	K08A2.4	K08A2.4	chrII	2988135	+	11	0	172	167	CE23861 | K08A2.4 | WBGene00019513 | WP:CE23861
UTGB	GTSSWA201090.01	exon	K08A2.2	K08A2.2	chrII	2991593	+	16	0.8493	19	-1	CE21036 | K08A2.2 | WBGene00019512 | WP:CE21036
UTGB	GTSSWA201091.01	exon	sdz-5	C41H7.8	chrII	3008695	+	11	0	482	-1	C41H7.8 | CE33365 | WBGene00016578 | WP:CE33365 | fbxb-113 | sdz-5
UTGB	GTSSWA201092.01	exon	clec-3	C41H7.7	chrII	3019791	-	28	1.895	8	-1	C41H7.7 | CE32606 | WBGene00016577 | WP:CE32606 | clec-3
UTGB	GTSSWA201093.02	outron	Y25C1A.6	Y25C1A.6.2	chrII	3061104	+	58	1.322	60	21	CE21473 | WBGene00021293 | WP:CE21473 | Y25C1A.6 | Y25C1A.6.1 | Y25C1A.6.2
UTGB	GTSSWA201094.01	exon	srg-23	Y25C1A.11	chrII	3096930	-	103	0	2131	-1	CE36336 | WBGene00005180 | WP:CE36336 | Y25C1A.11 | srg-23
UTGB	GTSSWA201095.03	outron	Y25C1A.13	Y25C1A.13	chrII	3111242	-	66	0.8691	24	15	CE21481 | WBGene00021296 | WP:CE21481 | Y25C1A.13
UTGB	GTSSWA201096.01	exon	clec-123	Y25C1A.1	chrII	3114243	+	96	4.854	42	-1	CE21468 | WBGene00021288 | WP:CE21468 | Y25C1A.1 | clec-123
UTGB	GTSSWA201097.02	exon	Y27F2A.8	Y27F2A.8	chrII	3183791	+	13	2.696	5	-1	CE33729 | WBGene00021299 | WP:CE33729 | Y27F2A.8
UTGB	GTSSWA201098.01	exon	gcy-15	ZC239.7	chrII	3197295	-	26	2.332	424	-1	CE42950 | WBGene00001541 | WP:CE42950 | ZC239.7 | gcy-15
UTGB	GTSSWA201099.03	outron	ZC239.6	ZC239.6.1	chrII	3209516	+	18	0.6248	143	136	CE32765 | WBGene00022569 | WP:CE32765 | ZC239.6 | ZC239.6.1 | ZC239.6.2 | ZC239.6.3
UTGB	GTSSWA201100.03	exon	ZC239.5	ZC239.5	chrII	3212271	+	13	0	95	-1	CE15120 | WBGene00022568 | WP:CE15120 | ZC239.5
UTGB	GTSSWA201101.01	exon	ZC239.14	ZC239.14	chrII	3222042	-	75	3.573	36	-1	CE42889 | WBGene00022572 | WP:CE42889 | ZC239.14
UTGB	GTSSWA201102.02	exon	ZC239.13	ZC239.13	chrII	3222846	-	27	0.5766	36	-1	CE15134 | CE33490 | WBGene00022571 | WP:CE15134 | WP:CE33490 | ZC239.13 | ZC239.13a | ZC239.13b
UTGB	GTSSWA201103.01	outron	ZC239.15	ZC239.15	chrII	3224675	-	10	0	36	22	CE39307 | WBGene00022573 | WP:CE39307 | ZC239.15
UTGB	GTSSWA201104.02	exon	ZC239.16	ZC239.16	chrII	3225328	-	29	0	47	-1	CE15140 | WBGene00022574 | WP:CE15140 | ZC239.16
UTGB	GTSSWA201105.01	exon	C17F4.7	C17F4.7	chrII	3245998	-	151769	5.02	16	-1	C17F4.7 | CE27076 | WBGene00015913 | WP:CE27076
UTGB	GTSSWA201106.01	exon	fbxc-50	C17F4.5	chrII	3248137	-	307	0.6871	22	-1	C17F4.5 | CE27075 | WBGene00015912 | WP:CE27075 | fbxc-50
UTGB	GTSSWA201107.01	exon	C17F4.2	C17F4.2	chrII	3245785	+	81	0.4889	2902	-1	C17F4.2 | CE08275 | WBGene00015910 | WP:CE08275
UTGB	GTSSWA201108.01	exon	wht-4	F02E11.1	chrII	3278919	+	16	1.317	564	-1	CE36815 | F02E11.1 | WBGene00017179 | WP:CE36815 | wht-4
UTGB	GTSSWA201109.01	exon	btb-16	F39E9.2	chrII	3296855	+	17	0	49	-1	CE32655 | F39E9.2 | WBGene00018195 | WP:CE32655 | btb-16
UTGB	GTSSWA201110.01	exon	F39E9.7	F39E9.7	chrII	3307499	-	249	0.4268	385	-1	CE44612 | F39E9.7 | WBGene00018199 | WP:CE44612
UTGB	GTSSWA201111.01	exon	F39E9.6	F39E9.6	chrII	3313550	-	50	0.466	1624	-1	CE10108 | F39E9.6 | WBGene00018198 | WP:CE10108
UTGB	GTSSWA201112.03	exon	Y46D2A.2	Y46D2A.2	chrII	3323213	-	61	0	36	-1	CE45014 | WBGene00021590 | WP:CE45014 | Y46D2A.2
UTGB	GTSSWA201113.01	exon	Y46D2A.1	Y46D2A.1	chrII	3323723	+	13	2.17	740	-1	CE36035 | WBGene00021589 | WP:CE36035 | Y46D2A.1
UTGB	GTSSWA201114.01	exon	Y46D2A.3	Y46D2A.3	chrII	3329360	-	14	0	2324	-1	CE25301 | WBGene00021591 | WP:CE25301 | Y46D2A.3
UTGB	GTSSWA201115.02	outron	F14D2.8	F14D2.8	chrII	3350021	-	12	0	685	123	CE37000 | F14D2.8 | F14D2.8.1 | F14D2.8.2 | F14D2.8.3 | WBGene00017456 | WP:CE37000
UTGB	GTSSWA201116.01	outron	T06D4.1	T06D4.1a	chrII	3381789	+	10	4.357	42	42	CE13301 | CE41157 | T06D4.1 | T06D4.1a | T06D4.1b | T06D4.1b.1 | T06D4.1b.2 | T06D4.1b.3 | WBGene00020290 | WP:CE13301 | WP:CE41157
UTGB	GTSSWA201117.01	exon	F18A12.5	F18A12.5	chrII	3399317	-	13	0.8042	60	-1	CE35493 | F18A12.5 | WBGene00017554 | WP:CE35493
UTGB	GTSSWA201118.01	exon	F18A12.6	F18A12.6	chrII	3402957	-	62	0.4456	70	-1	CE41892 | F18A12.6 | WBGene00017555 | WP:CE41892
UTGB	GTSSWA201119.01	exon	F18A12.4	F18A12.4	chrII	3403831	+	313	0.3753	83	-1	CE36827 | F18A12.4 | WBGene00017553 | WP:CE36827
UTGB	GTSSWA201120.01	exon	F18A12.7	F18A12.7	chrII	3414490	-	69	1.309	25	-1	CE09460 | F18A12.7 | WBGene00017556 | WP:CE09460
UTGB	GTSSWA201121.02	exon	fbxb-104	Y49F6B.7	chrII	3477194	-	53	3.655	10	-1	CE25340 | WBGene00021719 | WP:CE25340 | Y49F6B.7 | fbxb-104
UTGB	GTSSWA201122.01	outron	smu-2	Y49F6B.4	chrII	3482437	+	144	6.826	71	43	CE25338 | WBGene00004896 | WP:CE25338 | Y49F6B.4 | smu-2
UTGB	GTSSWA201123.01	exon	W10G11.19	W10G11.19	chrII	3550655	+	70	2.338	11	-1	CE30208 | W10G11.19 | WBGene00021148 | WP:CE30208
UTGB	GTSSWA201124.03	exon	dnc-3	W10G11.20.1	chrII	3553790	+	467	1.821	40	-1	CE41593 | W10G11.20 | W10G11.20.1 | W10G11.20.2 | W10G11.20.3 | W10G11.20.4 | WBGene00021149 | WP:CE41593 | dnc-3
UTGB	GTSSWA201125.01	exon	W10G11.2	W10G11.2	chrII	3561643	-	10	0	26	-1	CE36028 | W10G11.2 | WBGene00021135 | WP:CE36028
UTGB	GTSSWA201127.02	exon	fbxb-33	M151.8	chrII	3647404	+	57	1.188	24	-1	CE38623 | M151.8 | WBGene00044314 | WP:CE38623 | fbxb-33
UTGB	GTSSWA201128.01	exon	F19B10.2	F19B10.2	chrII	3675640	+	29	3.094	65	-1	CE32630 | F19B10.2 | WBGene00017584 | WP:CE32630
UTGB	GTSSWA201129.01	outron	F19B10.10	F19B10.10.1	chrII	3680448	-	10	3.552	23	16	CE09477 | F19B10.10 | F19B10.10.1 | F19B10.10.2 | WBGene00017589 | WP:CE09477
UTGB	GTSSWA201130.01	exon	fbxc-53	C46E10.5	chrII	3711273	+	12	1.656	27	-1	C46E10.5 | CE08763 | WBGene00016711 | WP:CE08763 | fbxc-53
UTGB	GTSSWA201131.01	outron	fbxc-52	C46E10.4	chrII	3717205	+	27	0.9775	56	50	C46E10.4 | CE29724 | WBGene00016710 | WP:CE29724 | fbxc-52
UTGB	GTSSWA201132.01	exon	C46E10.1	C46E10.1	chrII	3724238	+	15	0	16	-1	C46E10.1 | CE36110 | WBGene00016707 | WP:CE36110
UTGB	GTSSWA201133.01	exon	C46E10.8	C46E10.8	chrII	3727453	-	53	4.238	24	-1	C46E10.8 | CE27861 | WBGene00016712 | WP:CE27861
UTGB	GTSSWA201134.01	exon	sdz-12	F12E12.5	chrII	3731855	-	12	0.8493	312	-1	CE20674 | F12E12.5 | WBGene00017406 | WP:CE20674 | sdz-12
UTGB	GTSSWA201135.01	exon	F12E12.11	F12E12.11	chrII	3743808	-	91	0.5363	37	-1	CE41633 | F12E12.11 | WBGene00044811 | WP:CE41633
UTGB	GTSSWA201136.02	exon	sdz-11	F12E12.7	chrII	3752288	-	26	1.752	15	-1	CE39489 | F12E12.7 | WBGene00017408 | WP:CE39489 | fbxb-89 | sdz-11
UTGB	GTSSWA201137.02	outron	T24E12.5	T24E12.5	chrII	3753243	+	18	0	672	655	CE35625 | T24E12.5 | WBGene00020774 | WP:CE35625
UTGB	GTSSWA201138.01	exon	ins-32	Y8A9A.6	chrII	3803337	-	21	0	24	-1	CE21340 | WBGene00002115 | WP:CE21340 | Y8A9A.6 | ins-32
UTGB	GTSSWA201139.01	outron	F54D10.5	F54D10.5	chrII	3808227	-	14	0	63	56	CE19455 | F54D10.5 | WBGene00018806 | WP:CE19455
UTGB	GTSSWA201140.01	outron	F54D10.3	F54D10.3	chrII	3810845	+	10	2.968	1454	1434	CE19453 | F54D10.3 | WBGene00018804 | WP:CE19453
UTGB	GTSSWA201141.01	outron	F54D10.7	F54D10.7	chrII	3821365	-	10	0	90	75	CE19457 | F54D10.7 | WBGene00018808 | WP:CE19457
UTGB	GTSSWA201142.01	outron	skr-15	F54D10.1	chrII	3824040	+	12	2.548	108	101	CE19451 | F54D10.1 | WBGene00004821 | WP:CE19451 | skr-15
UTGB	GTSSWA201143.02	exon	fbxb-103	F53C3.2	chrII	3907137	+	56	0.9452	23	-1	CE19440 | F53C3.2 | WBGene00018746 | WP:CE19440 | fbxb-103
UTGB	GTSSWA201144.01	exon	F53C3.1	F53C3.1	chrII	3911996	+	15	2.024	44	-1	CE35938 | F53C3.1 | WBGene00018745 | WP:CE35938
UTGB	GTSSWA201145.03	exon	Y14H12A.1	Y14H12A.1	chrII	3993243	+	348	14.86	56	-1	CE26051 | WBGene00021190 | WP:CE26051 | Y14H12A.1
UTGB	GTSSWA201146.01	exon	pqn-48	K07D4.8	chrII	4038865	+	54	0	92	-1	CE25937 | K07D4.8 | WBGene00004135 | WP:CE25937 | pqn-48
UTGB	GTSSWA201147.02	outron	rpn-11	K07D4.3.1	chrII	4044473	-	11	0	154	148	CE19527 | K07D4.3 | K07D4.3.1 | K07D4.3.2 | WBGene00004467 | WP:CE19527 | rpn-11
UTGB	GTSSWA201148.02	outron	T08H4.2	T08H4.2	chrII	4107263	+	76	0.6006	2017	1941	CE29471 | T08H4.2 | WBGene00020367 | WP:CE29471
UTGB	GTSSWA201149.01	outron	C16A11.5	C16A11.5	chrII	4222626	+	11	0	682	679	C16A11.5 | CE34689 | WBGene00015818 | WP:CE34689
UTGB	GTSSWA201150.02	outron	C16A11.4	C16A11.4a	chrII	4226877	+	82	1.392	174	163	C16A11.4 | C16A11.4a | C16A11.4b | CE34688 | CE41103 | WBGene00015817 | WP:CE34688 | WP:CE41103
UTGB	GTSSWA201151.01	outron	fbxc-43	C16A11.9	chrII	4236054	-	13	0	77	65	C16A11.9 | CE40740 | WBGene00045297 | WP:CE40740 | fbxc-43
UTGB	GTSSWA201152.01	outron	fbxc-44	C16A11.6	chrII	4237822	-	53	0.531	90	78	C16A11.6 | CE40739 | WBGene00015819 | WP:CE40739 | fbxc-44
UTGB	GTSSWA201153.04	outron	C16A11.2	C16A11.2a.1	chrII	4238164	+	109	1.004	43	33	C16A11.2 | C16A11.2a | C16A11.2a.1 | C16A11.2a.2 | C16A11.2b | C16A11.2b.1 | C16A11.2b.2 | CE36978 | CE36979 | WBGene00015815 | WP:CE36978 | WP:CE36979
UTGB	GTSSWA201154.01	exon	C16A11.7	C16A11.7	chrII	4256957	-	27	0	23	-1	C16A11.7 | C16A11.7.1 | C16A11.7.2 | CE34690 | WBGene00015820 | WP:CE34690
UTGB	GTSSWA201155.01	exon	C01F1.5	C01F1.5	chrII	4281845	-	19	1.976	23	-1	C01F1.5 | CE06746 | WBGene00015300 | WP:CE06746
UTGB	GTSSWA201156.01	outron	Y52E8A.3	Y52E8A.3	chrII	4306997	-	24	0	53	32	CE25389 | WBGene00021796 | WP:CE25389 | Y52E8A.3
UTGB	GTSSWA201157.01	outron	Y52E8A.2	Y52E8A.2	chrII	4320738	+	16	0	110	91	CE25390 | WBGene00021795 | WP:CE25390 | Y52E8A.2
UTGB	GTSSWA201158.01	outron	H20J04.6	H20J04.6	chrII	4323099	+	25	0	155	151	CE40258 | H20J04.6 | WBGene00019221 | WP:CE40258
UTGB	GTSSWA201159.02	outron	H20J04.9	H20J04.9	chrII	4350628	+	50	6.121	565	555	CE38615 | H20J04.9 | WBGene00044310 | WP:CE38615
UTGB	GTSSWA201160.01	exon	H20J04.1	H20J04.1	chrII	4355596	+	35	0	70	-1	CE23811 | H20J04.1 | WBGene00019216 | WP:CE23811
UTGB	GTSSWA201161.02	exon	B0286.3	B0286.3	chrII	4372533	-	229	0.3861	22	-1	B0286.3 | CE03863 | WBGene00015116 | WP:CE03863
UTGB	GTSSWA201162.02	outron	B0286.4d.2	B0286.4d.2	chrII	4376694	-	51	0.8767	2009	2001	B0286.4 | B0286.4a | B0286.4a.1 | B0286.4a.2 | B0286.4b | B0286.4c | B0286.4c.1 | B0286.4c.2 | B0286.4c.3 | B0286.4c.4 | B0286.4c.5 | B0286.4c.6 | B0286.4c.7 | B0286.4c.8 | B0286.4d | B0286.4d.1 | B0286.4d.2 | B0286.4d.3 | B0286.4d.4 | B0286.4d.5 | CE03864 | CE29537 | CE29538 | CE39662 | WBGene00003825 | WP:CE03864 | WP:CE29537 | WP:CE29538 | WP:CE39662 | ntl-2
UTGB	GTSSWA201163.01	exon	mlt-7	ZK430.8	chrII	4392988	+	353	1.386	34	-1	CE05084 | WBGene00022743 | WP:CE05084 | ZK430.8 | ZK430.8.1 | ZK430.8.2 | mlt-7 | phi-48
UTGB	GTSSWA201164.01	outron	ZK430.5	ZK430.5	chrII	4404575	+	14	3.893	1280	1079	CE05081 | WBGene00022741 | WP:CE05081 | ZK430.5
UTGB	GTSSWA201165.02	outron	ZK430.7	ZK430.7.1	chrII	4424928	-	51	2.004	42	34	CE05083 | WBGene00022742 | WP:CE05083 | ZK430.7 | ZK430.7.1 | ZK430.7.2
UTGB	GTSSWA201166.02	outron	toe-1	ZK430.1	chrII	4424402	+	54	0	800	758	CE05078 | WBGene00022739 | WP:CE05078 | ZK430.1 | toe-1
UTGB	GTSSWA201167.02	exon	nhr-273	T12C9.1	chrII	4435303	+	34	2.209	67	-1	CE26822 | T12C9.1 | WBGene00020460 | WP:CE26822 | nhr-273
UTGB	GTSSWA201168.01	outron	T12C9.7	T12C9.7b	chrII	4460405	-	34	1.021	62	39	CE41930 | CE41931 | CE41932 | T12C9.7 | T12C9.7a | T12C9.7b | T12C9.7c | WBGene00020461 | WP:CE41930 | WP:CE41931 | WP:CE41932
UTGB	GTSSWA201169.01	exon	W06B4.1	W06B4.1	chrII	4471116	+	18	0	276	-1	CE02890 | W06B4.1 | WBGene00021056 | WP:CE02890
UTGB	GTSSWA201170.04	outron	B0304.4	B0304.4	chrII	4523192	-	58	1.622	69	11	B0304.4 | CE03872 | WBGene00015136 | WP:CE03872
UTGB	GTSSWA201171.01	outron	K07E1.1	K07E1.1	chrII	4549022	+	36	2.449	2067	2061	CE39745 | K07E1.1 | WBGene00019489 | WP:CE39745
UTGB	GTSSWA201172.01	exon	M03A1.8	M03A1.8	chrII	4560387	+	12	0	8	-1	CE41918 | M03A1.8 | WBGene00077490 | WP:CE41918
UTGB	GTSSWA201173.01	outron	dao-2	M03A1.7.1	chrII	4562846	+	43	1.211	93	92	CE33427 | M03A1.7 | M03A1.7.1 | M03A1.7.2 | WBGene00000928 | WP:CE33427 | dao-2
UTGB	GTSSWA201174.01	outron	F35D11.5	F35D11.5.1	chrII	4603175	-	10	0	553	553	CE29789 | F35D11.5 | F35D11.5.1 | F35D11.5.2 | WBGene00018046 | WP:CE29789
UTGB	GTSSWA201175.01	outron	F35D11.4	F35D11.4.1	chrII	4603394	+	19	0	28	21	CE32648 | F35D11.4 | F35D11.4.1 | F35D11.4.2 | F35D11.4.3 | WBGene00018045 | WP:CE32648
UTGB	GTSSWA201176.01	outron	lgc-27	Y74E4A.1b	chrII	4649072	+	11	0	94	23	CE30327 | CE30328 | WBGene00022283 | WP:CE30327 | WP:CE30328 | Y74E4A.1 | Y74E4A.1a | Y74E4A.1b | lgc-27
UTGB	GTSSWA201177.01	exon	T05A7.6	T05A7.6	chrII	4671787	-	48	0.4904	59	-1	CE04892 | T05A7.6 | WBGene00020223 | WP:CE04892
UTGB	GTSSWA201178.03	exon	F10G7.5	F10G7.5b	chrII	4693443	+	33	0.9861	52	-1	CE27947 | CE40035 | F10G7.5 | F10G7.5a | F10G7.5b | WBGene00017369 | WP:CE27947 | WP:CE40035
UTGB	GTSSWA201179.02	outron	rpn-5	F10G7.8.1	chrII	4698380	-	24	0.8493	99	97	CE02632 | F10G7.8 | F10G7.8.1 | F10G7.8.2 | F10G7.8.3 | WBGene00004461 | WP:CE02632 | rpn-5
UTGB	GTSSWA201180.01	outron	scc-1	F10G7.4	chrII	4698040	+	152	1.682	669	669	CE02628 | F10G7.4 | WBGene00004737 | WP:CE02628 | coh-2 | rad-21.1 | scc-1
UTGB	GTSSWA201181.01	outron	unc-85	F10G7.3	chrII	4701918	+	118	19.74	139	139	CE39722 | F10G7.3 | WBGene00006817 | WP:CE39722 | asf-1 | unc-85
UTGB	GTSSWA201182.03	outron	F10G7.9	F10G7.9b.1	chrII	4706436	-	86	0.4508	476	92	CE32371 | CE32372 | F10G7.9 | F10G7.9a | F10G7.9b | F10G7.9b.1 | F10G7.9b.2 | WBGene00017372 | WP:CE32371 | WP:CE32372
UTGB	GTSSWA201183.02	outron	tsn-1	F10G7.2.1	chrII	4706581	+	49	0.5785	251	228	CE02626 | F10G7.2 | F10G7.2.1 | F10G7.2.2 | WBGene00006626 | WP:CE02626 | tsn-1
UTGB	GTSSWA201184.05	outron	tag-151	F10G7.1.1	chrII	4709833	+	148	1.468	449	449	CE02624 | F10G7.1 | F10G7.1.1 | F10G7.1.2 | WBGene00006497 | WP:CE02624 | tag-151
UTGB	GTSSWA201185.05	outron	F41C3.5	F41C3.5.1	chrII	4737623	+	303	0.4123	14	12	CE02733 | F41C3.5 | F41C3.5.1 | F41C3.5.2 | WBGene00018271 | WP:CE02733
UTGB	GTSSWA201186.01	outron	F41C3.4	F41C3.4	chrII	4740250	+	11	0	184	149	CE39501 | F41C3.4 | WBGene00018270 | WP:CE39501
UTGB	GTSSWA201187.01	outron	F41C3.2	F41C3.2	chrII	4747319	+	11	4.055	2646	2636	CE39500 | F41C3.2 | WBGene00018268 | WP:CE39500
UTGB	GTSSWA201188.03	outron	C27D9.1	C27D9.1	chrII	4753413	+	42	1.893	30	19	C27D9.1 | CE44830 | WBGene00016163 | WP:CE44830
UTGB	GTSSWA201189.01	exon	C27D9.2	C27D9.2	chrII	4756809	-	14	0	55	-1	C27D9.2 | CE41873 | WBGene00016164 | WP:CE41873
UTGB	GTSSWA201191.01	exon	F26G1.11	F26G1.11	chrII	4777166	+	13	0	28	-1	CE41125 | F26G1.11 | WBGene00045455 | WP:CE41125
UTGB	GTSSWA201190.01	exon	F26G1.6	F26G1.6	chrII	4783776	-	23	1.83	2535	-1	CE37363 | F26G1.6 | WBGene00017842 | WP:CE37363
UTGB	GTSSWA201192.01	exon	msp-3	F26G1.7	chrII	4786303	-	311	0.3552	33	-1	CE02699 | F26G1.7 | WBGene00003424 | WP:CE02699 | msp-3
UTGB	GTSSWA201193.01	exon	C33F10.8	C33F10.8	chrII	4825149	-	45	0	55	-1	C33F10.8 | CE29695 | WBGene00016356 | WP:CE29695
UTGB	GTSSWA201194.01	exon	msp-40	C33F10.9	chrII	4825368	+	661	1.27	34	-1	C33F10.9 | CE02806 | WBGene00003435 | WP:CE02806 | msp-40
UTGB	GTSSWA201195.02	exon	C33F10.11	C33F10.11	chrII	4834821	-	59	0.9002	51	-1	C33F10.11 | C33F10.11a | C33F10.11b | C33F10.11b.1 | C33F10.11b.2 | CE04143 | CE43712 | WBGene00016357 | WP:CE04143 | WP:CE43712
UTGB	GTSSWA201196.01	exon	nspd-4	T23B7.1	chrII	4842549	+	346	1.098	47	-1	CE02882 | T23B7.1 | WBGene00020715 | WP:CE02882 | nspd-4
UTGB	GTSSWA201197.01	exon	F11G11.8.1	F11G11.8.1	chrII	4860395	-	1002	1.184	46	-1	CE02882 | F11G11.8 | F11G11.8.1 | F11G11.8.2 | WBGene00017386 | WP:CE02882 | nspd-5
UTGB	GTSSWA201198.01	exon	F11G11.9	F11G11.9	chrII	4863444	-	52	0	50	-1	CE09351 | F11G11.9 | WBGene00017387 | WP:CE09351
UTGB	GTSSWA201199.01	exon	col-20	F11G11.11	chrII	4870773	-	20262	6.894	14	-1	CE36533 | F11G11.11 | WBGene00000609 | WP:CE36533 | col-20
UTGB	GTSSWA201200.01	exon	F11G11.13	F11G11.13	chrII	4878052	-	13	0	2362	-1	CE09355 | F11G11.13 | WBGene00017388 | WP:CE09355
UTGB	GTSSWA201201.03	exon	gst-7	F11G11.2	chrII	4882060	+	160	1.546	46	-1	CE07055 | F11G11.2 | WBGene00001755 | WP:CE07055 | gst-7
UTGB	GTSSWA201202.01	exon	gst-8	F11G11.1	chrII	4883688	+	14	1.064	53	-1	CE07054 | F11G11.1 | WBGene00001756 | WP:CE07054 | gst-8
UTGB	GTSSWA201203.07	outron	R05F9.6	R05F9.6	chrII	4889086	+	85	1.758	344	338	CE04809 | R05F9.6 | R05F9.6.1 | R05F9.6.2 | WBGene00019890 | WP:CE04809
UTGB	GTSSWA201204.01	exon	gst-9	R05F9.5	chrII	4891560	+	51	0.6929	15	-1	CE04807 | R05F9.5 | WBGene00001757 | WP:CE04807 | gst-9
UTGB	GTSSWA201205.01	exon	msp-33	R05F9.8	chrII	4892715	-	725	0.317	33	-1	CE04811 | R05F9.8 | WBGene00003431 | WP:CE04811 | msp-33
UTGB	GTSSWA201206.02	outron	R05F9.9	R05F9.9	chrII	4902484	-	25	12.97	397	396	CE41921 | R05F9.9 | WBGene00019892 | WP:CE41921
UTGB	GTSSWA201207.02	outron	R05F9.1	R05F9.1b	chrII	4904549	+	21	0	497	446	CE04803 | CE30102 | CE33431 | CE36498 | R05F9.1 | R05F9.1a | R05F9.1b | R05F9.1c | R05F9.1c.1 | R05F9.1c.2 | R05F9.1d | WBGene00019888 | WP:CE04803 | WP:CE30102 | WP:CE33431 | WP:CE36498
UTGB	GTSSWA201208.01	exon	msp-152	ZK546.6	chrII	4932979	+	468	3.031	34	-1	CE02920 | WBGene00003470 | WP:CE02920 | ZK546.6 | msp-152
UTGB	GTSSWA201209.01	exon	gst-30	ZK546.11	chrII	4935024	-	29	0	21	-1	CE02912 | WBGene00001778 | WP:CE02912 | ZK546.11 | gst-30
UTGB	GTSSWA201210.02	exon	ZK546.4	ZK546.4	chrII	4938018	+	68	0.9964	24	-1	CE02918 | WBGene00022761 | WP:CE02918 | ZK546.4
UTGB	GTSSWA201211.03	outron	ZK546.2	ZK546.2c	chrII	4945922	+	17	0	91	91	CE36076 | CE36077 | CE43764 | WBGene00022759 | WP:CE36076 | WP:CE36077 | WP:CE43764 | ZK546.2 | ZK546.2a | ZK546.2b | ZK546.2b.1 | ZK546.2b.2 | ZK546.2c
UTGB	GTSSWA201212.01	exon	try-1	ZK546.15	chrII	4949472	-	243	0.4502	23	-1	CE36075 | WBGene00006619 | WP:CE36075 | ZK546.15 | try-1
UTGB	GTSSWA201213.01	outron	ndx-3	Y38A8.1	chrII	4953128	+	17	2.349	664	447	CE07570 | WBGene00003580 | WP:CE07570 | Y38A8.1 | ndx-3
UTGB	GTSSWA201214.01	outron	ulp-2	Y38A8.3	chrII	4959856	-	123	18.61	52	27	CE29374 | WBGene00006737 | WP:CE29374 | Y38A8.3 | ulp-2
UTGB	GTSSWA201215.02	outron	T27F7.1	T27F7.1.1	chrII	4994026	+	16	0	180	177	CE27211 | T27F7.1 | T27F7.1.1 | T27F7.1.2 | T27F7.1.3 | WBGene00020866 | WP:CE27211
UTGB	GTSSWA201216.03	outron	F59A6.5	F59A6.5	chrII	4999399	+	54	1.675	111	109	CE02790 | F59A6.5 | WBGene00019087 | WP:CE02790
UTGB	GTSSWA201217.01	exon	F59A6.4	F59A6.4	chrII	5005067	+	32	0	56	-1	CE01982 | F59A6.4 | WBGene00019086 | WP:CE01982
UTGB	GTSSWA201218.02	exon	F59A6.2	F59A6.2	chrII	5014710	+	60	0	35	-1	CE01980 | F59A6.2 | WBGene00019084 | WP:CE01980
UTGB	GTSSWA201219.02	outron	F33G12.5	F33G12.5.1	chrII	5040103	-	26	2.17	83	26	CE37768 | F33G12.5 | F33G12.5.1 | F33G12.5.2 | WBGene00018017 | WP:CE37768
UTGB	GTSSWA201220.03	outron	ify-1	C27A2.3.1	chrII	5055202	-	307	4.203	61	37	C27A2.3 | C27A2.3.1 | C27A2.3.2 | CE04103 | WBGene00002068 | WP:CE04103 | ify-1
UTGB	GTSSWA201221.03	outron	C27A2.2a.3	C27A2.2a.3	chrII	5055447	+	90	0.4981	160	154	C27A2.2 | C27A2.2a | C27A2.2a.1 | C27A2.2a.2 | C27A2.2a.3 | C27A2.2b | CE04102 | CE29188 | WBGene00004434 | WP:CE04102 | WP:CE29188 | rpl-22
UTGB	GTSSWA201222.01	exon	C27A2.5	C27A2.5	chrII	5069608	-	164	0.9514	14	-1	C27A2.5 | CE04105 | WBGene00016153 | WP:CE04105
UTGB	GTSSWA201223.01	outron	C04G6.4	C04G6.4	chrII	5084205	-	24	3.596	787	779	C04G6.4 | CE32112 | WBGene00015454 | WP:CE32112
UTGB	GTSSWA201224.01	exon	C04G6.5	C04G6.5	chrII	5085769	+	36	0.6248	34	-1	C04G6.5 | CE06766 | WBGene00015455 | WP:CE06766
UTGB	GTSSWA201225.01	exon	C04G6.2	C04G6.2	chrII	5093220	+	86	0	11	-1	C04G6.2 | CE41865 | WBGene00015453 | WP:CE41865
UTGB	GTSSWA201226.01	outron	C04G6.6	C04G6.6	chrII	5100225	-	33	1.736	492	485	C04G6.6 | CE06767 | WBGene00015456 | WP:CE06767
UTGB	GTSSWA201227.01	exon	C04G6.7	C04G6.7	chrII	5101782	-	75	0.8899	15	-1	C04G6.7 | CE27652 | WBGene00015457 | WP:CE27652
UTGB	GTSSWA201228.01	exon	C04G6.10	C04G6.10	chrII	5101968	+	57	0.6746	13	-1	C04G6.10 | CE27649 | WBGene00015458 | WP:CE27649
UTGB	GTSSWA201229.02	exon	C04G6.11	C04G6.11	chrII	5105210	-	853	1.67	1392	-1	C04G6.11 | CE27650 | WBGene00015459 | WP:CE27650
UTGB	GTSSWA201230.02	outron	mpk-2	C04G6.1c.2	chrII	5104413	+	24	1.195	216	210	C04G6.1 | C04G6.1a | C04G6.1b | C04G6.1c | C04G6.1c.1 | C04G6.1c.2 | CE31290 | CE32111 | CE36972 | WBGene00003402 | WP:CE31290 | WP:CE32111 | WP:CE36972 | mpk-2
UTGB	GTSSWA201231.01	exon	msp-74	F09C12.7	chrII	5115507	-	12	0	188	-1	CE02603 | F09C12.7 | WBGene00003462 | WP:CE02603 | msp-74 | msp-74ps
UTGB	GTSSWA201232.01	exon	F58A6.9.1	F58A6.9.1	chrII	5158970	-	40	1.001	113	-1	CE02603 | F58A6.9 | F58A6.9.1 | F58A6.9.2 | WBGene00019026 | WP:CE02603
UTGB	GTSSWA201233.02	exon	C27D6.11	C27D6.11	chrII	5161178	-	59	0.6042	65	-1	C27D6.11 | CE38691 | WBGene00044388 | WP:CE38691
UTGB	GTSSWA201234.02	exon	msp-49	C34F11.6	chrII	5194313	+	923	0	34	-1	C34F11.6 | CE04166 | WBGene00003442 | WP:CE04166 | msp-49
UTGB	GTSSWA201235.01	exon	C34F11.5	C34F11.5	chrII	5195861	+	28	1.327	25	-1	C34F11.5 | CE04165 | WBGene00016416 | WP:CE04165
UTGB	GTSSWA201236.01	exon	msp-50	C34F11.4	chrII	5199744	+	173	0	34	-1	C34F11.4 | CE02806 | WBGene00003443 | WP:CE02806 | msp-50
UTGB	GTSSWA201237.02	outron	C34F11.3	C34F11.3a.1	chrII	5201181	+	16	0.6556	2304	2122	C34F11.3 | C34F11.3a | C34F11.3a.1 | C34F11.3a.2 | C34F11.3b | C34F11.3c | CE44871 | CE44883 | CE44975 | WBGene00016415 | WP:CE44871 | WP:CE44883 | WP:CE44975
UTGB	GTSSWA201238.07	exon	C34F11.8	C34F11.8	chrII	5210846	-	207	1.717	84	-1	C34F11.8 | CE36986 | WBGene00016417 | WP:CE36986
UTGB	GTSSWA201239.02	exon	C34F11.2	C34F11.2	chrII	5212250	+	166	0.4219	23	-1	C34F11.2 | CE04163 | WBGene00016414 | WP:CE04163
UTGB	GTSSWA201240.01	exon	C34F11.1	C34F11.1	chrII	5212943	+	36	0.6006	31	-1	C34F11.1 | CE04162 | WBGene00016413 | WP:CE04162
UTGB	GTSSWA201241.01	outron	dsh-1	C34F11.9a	chrII	5227883	-	10	0	2535	2526	C34F11.9 | C34F11.9a | C34F11.9b | C34F11.9c | CE42449 | CE43333 | CE43370 | WBGene00001101 | WP:CE42449 | WP:CE43333 | WP:CE43370 | dsh-1
UTGB	GTSSWA201242.02	outron	pho-1	EGAP2.3.1	chrII	5235863	-	30	3.158	52	38	CE04325 | EGAP2.3 | EGAP2.3.1 | EGAP2.3.2 | WBGene00004020 | WP:CE04325 | pho-1
UTGB	GTSSWA201243.01	outron	pmt-1	ZK622.3a.1	chrII	5283126	-	16	0	643	635	CE29162 | CE32290 | CE33504 | CE33505 | WBGene00022781 | WP:CE29162 | WP:CE32290 | WP:CE33504 | WP:CE33505 | ZK622.3 | ZK622.3a | ZK622.3a.1 | ZK622.3a.2 | ZK622.3a.3 | ZK622.3b | ZK622.3c | ZK622.3c.1 | ZK622.3c.10 | ZK622.3c.11 | ZK622.3c.12 | ZK622.3c.13 | ZK622.3c.14 | ZK622.3c.2 | ZK622.3c.3 | ZK622.3c.4 | ZK622.3c.5 | ZK622.3c.6 | ZK622.3c.7 | ZK622.3c.8 | ZK622.3c.9 | ZK622.3d | ZK622.3d.1…
UTGB	GTSSWA201244.02	exon	gcy-12	F08B1.2	chrII	5312078	+	20	0	15	-1	CE27920 | F08B1.2 | WBGene00001538 | WP:CE27920 | gcy-12
UTGB	GTSSWA201245.01	outron	vhp-1	F08B1.1a.3	chrII	5330840	+	12	0	622	619	CE27918 | CE27919 | CE32357 | F08B1.1 | F08B1.1a | F08B1.1a.1 | F08B1.1a.2 | F08B1.1a.3 | F08B1.1a.4 | F08B1.1b | F08B1.1c | F08B1.1c.1 | F08B1.1c.2 | F08B1.1c.3 | WBGene00006923 | WP:CE27918 | WP:CE27919 | WP:CE32357 | nrf-2 | vhp-1
UTGB	GTSSWA201246.01	exon	F09E5.10	F09E5.10	chrII	5351642	-	11	0	1122	-1	CE02605 | F09E5.10 | WBGene00017288 | WP:CE02605
UTGB	GTSSWA201247.01	outron	F09E5.8	F09E5.8	chrII	5350558	+	16	2.491	91	84	CE02615 | F09E5.8 | F09E5.8.1 | F09E5.8.2 | WBGene00017286 | WP:CE02615
UTGB	GTSSWA201248.01	outron	F09E5.7	F09E5.7.1	chrII	5352002	+	11	1.253	80	70	CE02614 | F09E5.7 | F09E5.7.1 | F09E5.7.2 | WBGene00017285 | WP:CE02614
UTGB	GTSSWA201249.01	outron	srg-69	F09E5.4	chrII	5353369	+	26	3.74	2316	2290	CE33282 | F09E5.4 | WBGene00005226 | WP:CE33282 | srg-69
UTGB	GTSSWA201250.01	outron	F09E5.16	F09E5.16	chrII	5365718	-	20	1.933	56	23	CE39349 | F09E5.16 | WBGene00017292 | WP:CE39349
UTGB	GTSSWA201251.01	exon	agt-2	F09E5.13	chrII	5373362	-	17	0.8398	42	-1	CE02608 | F09E5.13 | WBGene00000094 | WP:CE02608 | agt-2 | cAGT-2
UTGB	GTSSWA201252.01	outron	F09E5.15b.1	F09E5.15b.1	chrII	5377657	+	15	0	511	151	CE32361 | CE41559 | F09E5.15 | F09E5.15a | F09E5.15a.1 | F09E5.15a.2 | F09E5.15b | F09E5.15b.1 | F09E5.15b.2 | WBGene00006434 | WP:CE32361 | WP:CE41559 | ceprx2 | prdx-2 | tag-56
UTGB	GTSSWA201253.01	exon	ccpp-6	EEED8.6	chrII	5387299	-	13	0	8	-1	CE40199 | EEED8.6 | WBGene00017136 | WP:CE40199 | ccpp-6
UTGB	GTSSWA201254.01	exon	ndx-6	EEED8.8	chrII	5390037	-	11	0	226	-1	CE27911 | EEED8.8 | WBGene00003583 | WP:CE27911 | ndx-6
UTGB	GTSSWA201255.01	outron	EEED8.10	EEED8.10a	chrII	5399304	-	18	0	448	428	CE39344 | EEED8.10 | EEED8.10a | EEED8.10a.1 | EEED8.10a.2 | EEED8.10b | WBGene00017138 | WP:CE39344
UTGB	GTSSWA201256.04	outron	mog-5	EEED8.5	chrII	5399438	+	15	0.6746	74	73	CE01889 | CeHRH-1 | EEED8.5 | WBGene00003393 | WP:CE01889 | mog-5
UTGB	GTSSWA201257.02	exon	EEED8.3	EEED8.3	chrII	5414514	+	110	1.332	70	-1	CE01887 | EEED8.3 | WBGene00017134 | WP:CE01887
UTGB	GTSSWA201258.02	outron	F07F6.8	F07F6.8.1	chrII	5426163	-	55	0	471	466	CE30073 | F07F6.8 | F07F6.8.1 | F07F6.8.2 | WBGene00017220 | WP:CE30073
UTGB	GTSSWA201259.01	exon	F07F6.1	F07F6.1	chrII	5437841	+	16	2.333	35	-1	CE01894 | F07F6.1 | WBGene00017215 | WP:CE01894
UTGB	GTSSWA201260.01	outron	daz-1	F56D1.7	chrII	5455788	+	36	12.25	519	490	CE27175 | F56D1.7 | WBGene00000935 | WP:CE27175 | daz-1
UTGB	GTSSWA201261.01	outron	clr-1	F56D1.4a	chrII	5466293	+	11	0	154	74	CE26369 | CE32051 | CE32052 | CE32053 | F56D1.4 | F56D1.4a | F56D1.4b | F56D1.4c | F56D1.4d | WBGene00000548 | WP:CE26369 | WP:CE32051 | WP:CE32052 | WP:CE32053 | clr-1
UTGB	GTSSWA201262.01	outron	F56D1.3	F56D1.3.1	chrII	5474192	+	11	0	189	154	CE29407 | F56D1.3 | F56D1.3.1 | F56D1.3.2 | WBGene00018961 | WP:CE29407
UTGB	GTSSWA201263.01	exon	F12A10.4	F12A10.4	chrII	5488105	+	28	0	61	-1	CE01907 | F12A10.4 | WBGene00017393 | WP:CE01907
UTGB	GTSSWA201264.01	exon	F12A10.2	F12A10.2	chrII	5494651	+	59	1.339	429	-1	CE01905 | F12A10.2 | WBGene00017391 | WP:CE01905
UTGB	GTSSWA201265.01	exon	F12A10.1	F12A10.1	chrII	5496599	+	40167	4.237	21	-1	CE42585 | F12A10.1 | WBGene00017390 | WP:CE42585
UTGB	GTSSWA201266.01	exon	F12A10.8	F12A10.8	chrII	5501049	-	46	7.69	44	-1	CE31784 | F12A10.8 | WBGene00017397 | WP:CE31784
UTGB	GTSSWA201267.01	outron	fzy-1	ZK177.6	chrII	5500728	+	60	0	897	881	CE26338 | WBGene00001511 | WP:CE26338 | ZK177.6 | fzy-1
UTGB	GTSSWA201268.01	outron	cyp-44A1	ZK177.5.1	chrII	5503957	+	12	0	63	60	CE25682 | WBGene00000375 | WP:CE25682 | ZK177.5 | ZK177.5.1 | ZK177.5.2 | ccp-44 | cyp-44 | cyp-44A1
UTGB	GTSSWA201269.01	exon	ZK177.2	ZK177.2	chrII	5519167	+	61	0	23	-1	CE02091 | WBGene00022670 | WP:CE02091 | ZK177.2
UTGB	GTSSWA201270.01	exon	C17C3.9	C17C3.9	chrII	5532269	-	14	2.548	41	-1	C17C3.9 | CE34699 | WBGene00015892 | WP:CE34699
UTGB	GTSSWA201271.01	exon	C17C3.11	C17C3.11	chrII	5537782	+	33	0	26	-1	C17C3.11 | C17C3.11.1 | C17C3.11.2 | CE34696 | WBGene00015893 | WP:CE34696
UTGB	GTSSWA201272.01	outron	acdh-2	C17C3.12a	chrII	5547630	-	110	0.5652	167	166	C17C3.12 | C17C3.12a | C17C3.12a.1 | C17C3.12a.2 | C17C3.12b | C17C3.12c | C17C3.12c.1 | C17C3.12c.2 | CE29175 | CE29176 | CE34697 | WBGene00015894 | WP:CE29175 | WP:CE29176 | WP:CE34697 | acdh-2
UTGB	GTSSWA201273.01	exon	ins-11	C17C3.4	chrII	5556706	+	18	1.25	28	-1	C17C3.4 | CE04024 | WBGene00002094 | WP:CE04024 | ins-11
UTGB	GTSSWA201274.01	exon	C17C3.1	C17C3.1a	chrII	5570610	+	108	0	248	-1	C17C3.1 | C17C3.15 | C17C3.1a | C17C3.1b | C17C3.1c | C17C3.1d | C17C3.1d.1 | C17C3.1d.2 | C17C3.1e | CE27069 | CE27070 | CE27071 | CE27072 | CE27073 | CE39676 | WBGene00015887 | WBGene00015896 | WP:CE27069 | WP:CE27070 | WP:CE27071 | WP:CE27072 | WP:CE27073 | WP:CE39676
UTGB	GTSSWA201275.01	exon	T25E4.1	T25E4.1	chrII	5578293	+	106	0.4046	42	-1	CE28493 | T25E4.1 | WBGene00020803 | WP:CE28493
UTGB	GTSSWA201276.02	outron	lys-8	C17G10.5.1	chrII	5586129	+	27	2.434	23	22	C17G10.5 | C17G10.5.1 | C17G10.5.2 | CE06846 | WBGene00003097 | WP:CE06846 | lys-8
UTGB	GTSSWA201277.01	outron	cdc-14	C17G10.4b	chrII	5593594	-	27	1.349	247	195	C17G10.4 | C17G10.4a | C17G10.4b | C17G10.4b.1 | C17G10.4b.2 | C17G10.4c | C17G10.4c.1 | C17G10.4c.2 | C17G10.4d | C17G10.4e | CE06845 | CE08287 | CE08288 | CE30868 | CE36916 | WBGene00000383 | WP:CE06845 | WP:CE08287 | WP:CE08288 | WP:CE30868 | WP:CE36916 | cdc-14 | cdc14
UTGB	GTSSWA201278.01	outron	C17G10.6	C17G10.6a	chrII	5605427	-	16	0	2160	2092	C17G10.6 | C17G10.6a | C17G10.6b | CE01790 | CE36104 | WBGene00015918 | WP:CE01790 | WP:CE36104
UTGB	GTSSWA201279.01	outron	C17G10.7	C17G10.7	chrII	5608140	-	10	0	343	311	C17G10.7 | CE01791 | WBGene00015919 | WP:CE01791
UTGB	GTSSWA201280.01	exon	F59E12.6	F59E12.6a	chrII	5629468	-	35	0.9997	51	-1	CE33407 | CE33408 | F59E12.6 | F59E12.6a | F59E12.6b | WBGene00019122 | WP:CE33407 | WP:CE33408
UTGB	GTSSWA201281.01	outron	zyg-1	F59E12.2.2	chrII	5649654	+	14	1.44	92	66	CE28571 | F59E12.2 | F59E12.2.1 | F59E12.2.2 | WBGene00006988 | WP:CE28571 | zyg-1
UTGB	GTSSWA201282.01	exon	bli-2	F59E12.12	chrII	5652417	-	108	1.337	23	-1	CE11540 | F59E12.12 | WBGene00000252 | WP:CE11540 | bli-2
UTGB	GTSSWA201283.01	outron	C25H3.12	C25H3.12	chrII	5660970	-	36	5.653	211	148	C25H3.12 | CE27092 | WBGene00016121 | WP:CE27092
UTGB	GTSSWA201284.01	exon	mdt-26	C25H3.6a	chrII	5661140	+	230	1.32	83	-1	C25H3.6 | C25H3.6a | C25H3.6b | C25H3.6c | CE36525 | CE44942 | CE45032 | WBGene00016115 | WP:CE36525 | WP:CE44942 | WP:CE45032 | mdt-26
UTGB	GTSSWA201285.01	exon	C25H3.16	C25H3.16	chrII	5666240	+	29	0	43	-1	C25H3.16 | CE38688 | WBGene00044392 | WP:CE38688
UTGB	GTSSWA201286.01	exon	C25H3.8	C25H3.8	chrII	5679015	-	10	0	802	-1	C25H3.8 | CE44862 | WBGene00016117 | WP:CE44862
UTGB	GTSSWA201287.02	exon	flp-27	C25H3.5	chrII	5680965	+	34	0.5369	42	-1	C25H3.5 | CE29185 | WBGene00016114 | WP:CE29185 | flp-27
UTGB	GTSSWA201288.01	outron	C25H3.11	C25H3.11	chrII	5690081	-	11	0	1205	1079	C25H3.11 | CE27091 | WBGene00016120 | WP:CE27091
UTGB	GTSSWA201289.03	exon	C25H3.10	C25H3.10b	chrII	5698919	-	223	1.155	34	-1	C25H3.10 | C25H3.10a | C25H3.10b | CE27090 | CE45010 | WBGene00016119 | WP:CE27090 | WP:CE45010
UTGB	GTSSWA201290.01	outron	tiar-1	C18A3.5f.1	chrII	5714913	-	14	3.322	1092	136	C18A3.5 | C18A3.5a | C18A3.5b | C18A3.5c | C18A3.5e | C18A3.5e.1 | C18A3.5e.2 | C18A3.5f | C18A3.5f.1 | C18A3.5f.2 | C18A3.5f.3 | C18A3.5f.4 | C18A3.5f.5 | CE27708 | CE27709 | CE27710 | CE32130 | CE32131 | WBGene00015943 | WP:CE27708 | WP:CE27709 | WP:CE27710 | WP:CE32130 | WP:CE32131 | tiar-1
UTGB	GTSSWA201291.01	outron	C18A3.10	C18A3.10	chrII	5715868	-	16	0	298	283	C18A3.10 | CE31306 | WBGene00015946 | WP:CE31306
UTGB	GTSSWA201292.01	exon	C18A3.7	C18A3.7	chrII	5730411	-	84	0.421	353	-1	C18A3.7 | CE01799 | WBGene00015944 | WP:CE01799
UTGB	GTSSWA201293.01	outron	ifb-2	F10C1.7c.1	chrII	5749924	+	19	2.448	244	234	CE02622 | CE27941 | CelIF b2 | F10C1.7 | F10C1.7a | F10C1.7c | F10C1.7c.1 | F10C1.7c.2 | IF b2 | WBGene00002054 | WP:CE02622 | WP:CE27941 | ifb-2
UTGB	GTSSWA201294.02	exon	acdh-8	K05F1.3	chrII	5794475	+	536	0.3544	48	-1	CE02807 | K05F1.3 | WBGene00019406 | WP:CE02807 | acdh-8
UTGB	GTSSWA201295.01	exon	msp-63	K05F1.7	chrII	5797450	-	15	0	33	-1	CE02811 | K05F1.7 | WBGene00003456 | WP:CE02811 | msp-63
UTGB	GTSSWA201296.01	exon	msp-142	K05F1.2	chrII	5797861	+	239	0.6662	34	-1	CE02806 | K05F1.2 | WBGene00003469 | WP:CE02806 | msp-142
UTGB	GTSSWA201297.01	exon	msp-64	ZK1248.6	chrII	5810332	-	191	0.4546	33	-1	CE02806 | WBGene00003457 | WP:CE02806 | ZK1248.6 | msp-64
UTGB	GTSSWA201298.01	exon	ZK1248.5	ZK1248.5	chrII	5810523	+	27	0	24	-1	CE02905 | WBGene00022876 | WP:CE02905 | ZK1248.5
UTGB	GTSSWA201299.01	exon	ZK1248.20	ZK1248.20	chrII	5816541	+	23	0	74	-1	CE38761 | WBGene00044393 | WP:CE38761 | ZK1248.20
UTGB	GTSSWA201300.01	exon	col-74	ZK1248.2	chrII	5830838	+	33	0	129	-1	CE02902 | WBGene00000650 | WP:CE02902 | ZK1248.2 | col-74
UTGB	GTSSWA201301.01	exon	ZK1248.19	ZK1248.19	chrII	5839345	-	10	10.63	50	-1	CE35374 | WBGene00022885 | WP:CE35374 | ZK1248.19
UTGB	GTSSWA201302.02	outron	H41C03.3	H41C03.3.1	chrII	5846427	+	18	1.699	1288	1288	CE32055 | H41C03.3 | H41C03.3.1 | H41C03.3.2 | H41C03.3.3 | WBGene00019270 | WP:CE32055
UTGB	GTSSWA201303.02	exon	tag-234	F55C12.7.1	chrII	5864149	+	397	1.543	13	-1	CE28455 | F55C12.7 | F55C12.7.1 | F55C12.7.2 | F55C12.7.3 | WBGene00018874 | WP:CE28455 | tag-234
UTGB	GTSSWA201305.01	outron	vps-35	F59G1.3	chrII	5907687	+	14	0.7682	99	95	CE39945 | F59G1.3 | WBGene00006933 | WP:CE39945 | vps-35
UTGB	GTSSWA201306.02	outron	cgt-3	F59G1.1b.1	chrII	5912472	+	24	1.129	98	51	CE29810 | CE29811 | CE30378 | CE33409 | F59G1.1 | F59G1.1a | F59G1.1b | F59G1.1b.1 | F59G1.1b.2 | F59G1.1b.3 | F59G1.1c | F59G1.1c.1 | F59G1.1c.2 | F59G1.1d | F59G1.1d.1 | F59G1.1d.2 | F59G1.1d.3 | F59G1.1d.4 | F59G1.1d.5 | WBGene00019127 | WP:CE29810 | WP:CE29811 | WP:CE30378 | WP:CE33409 | cgt-3
UTGB	GTSSWA201307.01	outron	frh-1	F59G1.7.1	chrII	5916666	+	15	3.05	722	722	CE19476 | F59G1.7 | F59G1.7.1 | F59G1.7.2 | WBGene00001486 | WP:CE19476 | frh-1
UTGB	GTSSWA201308.01	exon	ins-3	ZK75.3	chrII	5990683	-	14	2.88	9	-1	CE02102 | WBGene00002086 | WP:CE02102 | ZK75.3 | ins-3
UTGB	GTSSWA201309.01	exon	ins-6	ZK84.6	chrII	6000382	+	19	0	71	-1	CE15253 | WBGene00002089 | WP:CE15253 | ZK84.6 | ins-6
UTGB	GTSSWA201310.01	exon	ins-20	ZK84.7	chrII	6010797	+	66	1.012	103	-1	CE36082 | WBGene00002103 | WP:CE36082 | ZK84.7 | ins-20
UTGB	GTSSWA201311.01	exon	ZK84.5	ZK84.5	chrII	6016490	-	22	1.743	19	-1	CE02928 | WBGene00022652 | WP:CE02928 | ZK84.5
UTGB	GTSSWA201312.01	outron	R12C12.9	R12C12.9a.1	chrII	6024966	-	12	0	31	26	CE02854 | CE32059 | R12C12.9 | R12C12.9a | R12C12.9a.1 | R12C12.9a.2 | R12C12.9b | WBGene00020029 | WP:CE02854 | WP:CE32059
UTGB	GTSSWA201313.02	exon	R12C12.5	R12C12.5	chrII	6045124	-	199	0.593	26	-1	CE29820 | R12C12.5 | WBGene00020025 | WP:CE29820
UTGB	GTSSWA201314.01	exon	R12C12.6	R12C12.6a	chrII	6049668	-	13	0	1841	-1	CE02851 | CE39619 | R12C12.6 | R12C12.6a | R12C12.6b | R12C12.6b.1 | R12C12.6b.2 | R12C12.6b.3 | WBGene00020026 | WP:CE02851 | WP:CE39619
UTGB	GTSSWA201315.05	outron	R12C12.1	R12C12.1a.1	chrII	6050357	+	47	8.389	42	22	CE02846 | CE33434 | R12C12.1 | R12C12.1a | R12C12.1a.1 | R12C12.1a.2 | R12C12.1b | WBGene00020022 | WP:CE02846 | WP:CE33434
UTGB	GTSSWA201316.01	exon	H12I13.2	H12I13.2	chrII	6067191	-	22	0	93	-1	CE20962 | H12I13.2 | WBGene00019191 | WP:CE20962
UTGB	GTSSWA201317.05	exon	fbf-1	H12I13.4	chrII	6080763	-	200	3.459	84	-1	CE20960 | H12I13.4 | WBGene00001401 | WP:CE20960 | fbf-1
UTGB	GTSSWA201318.01	exon	fbf-2	F21H12.5	chrII	6091414	-	161	12.05	83	-1	CE01916 | F21H12.5 | WBGene00001402 | WP:CE01916 | fbf-2
UTGB	GTSSWA201319.01	outron	F21H12.1	F21H12.1	chrII	6097676	+	24	0.5646	114	112	CE32634 | F21H12.1 | WBGene00017683 | WP:CE32634
UTGB	GTSSWA201320.02	outron	rars-2	C29H12.1	chrII	6125091	+	25	0.5574	425	425	C29H12.1 | CE17479 | WBGene00004680 | WP:CE17479 | rars-2 | rrt-2
UTGB	GTSSWA201321.01	exon	F40H3.3	F40H3.3	chrII	6171477	+	19	0	22	-1	CE19864 | F40H3.3 | WBGene00018251 | WP:CE19864
UTGB	GTSSWA201322.02	outron	F40H3.2	F40H3.2	chrII	6173584	+	24	3.428	48	22	CE35530 | F40H3.2 | F40H3.2.1 | F40H3.2.2 | WBGene00018250 | WP:CE35530
UTGB	GTSSWA201323.01	exon	F40H3.1	F40H3.1a	chrII	6178023	+	22	0	1889	-1	CE19862 | CE39933 | F40H3.1 | F40H3.1a | F40H3.1b | WBGene00018249 | WP:CE19862 | WP:CE39933
UTGB	GTSSWA201324.01	exon	cpb-2	C30B5.3	chrII	6192791	+	25	0.6267	880	-1	C30B5.3 | CE44953 | WBGene00000771 | WP:CE44953 | cpb-2
UTGB	GTSSWA201325.01	outron	C30B5.4	C30B5.4	chrII	6196965	-	47	5.087	73	67	C30B5.4 | CE02523 | WBGene00016245 | WP:CE02523
UTGB	GTSSWA201326.05	outron	C30B5.2	C30B5.2a	chrII	6197127	+	38	0	64	16	C30B5.2 | C30B5.2a | C30B5.2b | CE31889 | CE31890 | WBGene00016244 | WP:CE31889 | WP:CE31890
UTGB	GTSSWA201327.01	outron	tag-319	C30B5.1	chrII	6198658	+	138	7.974	88	65	C30B5.1 | CE44916 | WBGene00016243 | WP:CE44916 | tag-319
UTGB	GTSSWA201328.03	outron	F13H8.11	F13H8.11	chrII	6259933	-	57	0.8879	25	11	CE29264 | F13H8.11 | WBGene00017443 | WP:CE29264
UTGB	GTSSWA201329.01	exon	nmgp-1	F13H8.4	chrII	6260896	+	12	3.397	278	-1	CE35476 | F13H8.4 | WBGene00017437 | WP:CE35476 | nmgp-1
UTGB	GTSSWA201330.01	outron	F13H8.3	F13H8.3	chrII	6264041	+	24	13.98	56	56	CE32626 | F13H8.3 | F13H8.3.1 | F13H8.3.2 | WBGene00017436 | WP:CE32626
UTGB	GTSSWA201331.02	outron	F13H8.8	F13H8.8	chrII	6269790	-	92	2.357	2214	2200	CE35477 | F13H8.8 | WBGene00017441 | WP:CE35477
UTGB	GTSSWA201332.02	outron	F13H8.2	F13H8.2	chrII	6268720	+	97	0.4691	1604	1604	CE27127 | F13H8.2 | WBGene00017435 | WP:CE27127
UTGB	GTSSWA201333.03	exon	C29F5.1	C29F5.1	chrII	6303466	+	175	1.486	41	-1	C29F5.1 | CE02508 | WBGene00016210 | WP:CE02508
UTGB	GTSSWA201334.02	outron	set-4	C32D5.5	chrII	6331277	-	26	0	69	33	C32D5.5 | CE01845 | WBGene00016313 | WP:CE01845 | set-4 | tag-337
UTGB	GTSSWA201335.01	outron	C32D5.8	C32D5.8a.1	chrII	6345876	-	74	0	2227	2219	C32D5.8 | C32D5.8a | C32D5.8a.1 | C32D5.8a.2 | C32D5.8b | CE01848 | CE37326 | WBGene00016316 | WP:CE01848 | WP:CE37326
UTGB	GTSSWA201336.01	exon	C32D5.1	C32D5.1	chrII	6344174	+	12	0	85	-1	C32D5.1 | CE34726 | WBGene00016310 | WP:CE34726
UTGB	GTSSWA201337.02	outron	K10B2.4	K10B2.4	chrII	6360895	-	117	9.409	64	57	CE02011 | K10B2.4 | WBGene00019607 | WP:CE02011
UTGB	GTSSWA201338.03	exon	ani-2	K10B2.5	chrII	6365308	-	465	0.3494	77	-1	CE02012 | K10B2.5 | WBGene00019608 | WP:CE02012 | ani-2 | tag-221
UTGB	GTSSWA201339.04	outron	clec-88	K10B2.3b.1	chrII	6365673	+	731	1.071	55	18	CE33419 | CE33420 | K10B2.3 | K10B2.3a | K10B2.3a.1 | K10B2.3a.2 | K10B2.3b | K10B2.3b.1 | K10B2.3b.2 | WBGene00019606 | WP:CE33419 | WP:CE33420 | clec-88 | cpg-6
UTGB	GTSSWA201340.02	exon	K10B2.2	K10B2.2a	chrII	6366945	+	110	0.6191	10	-1	CE02009 | CE33418 | K10B2.2 | K10B2.2a | K10B2.2b | WBGene00019605 | WP:CE02009 | WP:CE33418
UTGB	GTSSWA201341.02	outron	lin-23	K10B2.1	chrII	6370391	+	24	1.601	873	865	CE28600 | K10B2.1 | WBGene00003009 | WP:CE28600 | lin-23 | stu-1
UTGB	GTSSWA201342.01	outron	F58F12.1	F58F12.1.1	chrII	6383390	+	31	1.633	214	206	CE01976 | F58F12.1 | F58F12.1.1 | F58F12.1.2 | WBGene00019061 | WP:CE01976 | phi-38
UTGB	GTSSWA201343.01	outron	F58F12.4	F58F12.4	chrII	6384412	+	38	1.818	2332	2332	CE39944 | F58F12.4 | WBGene00044756 | WP:CE39944
UTGB	GTSSWA201344.01	exon	F58F12.3	F58F12.3	chrII	6391235	-	21	2.527	27	-1	CE01978 | F58F12.3 | WBGene00019063 | WP:CE01978
UTGB	GTSSWA201345.01	exon	btb-2	T25D10.5	chrII	6401889	+	14	0.8493	67	-1	CE32214 | T25D10.5 | WBGene00020802 | WP:CE32214 | btb-2
UTGB	GTSSWA201346.01	outron	T25D10.1	T25D10.1	chrII	6403471	+	10	0	171	54	CE32213 | T25D10.1 | WBGene00020799 | WP:CE32213
UTGB	GTSSWA201347.01	exon	K03H9.3	K03H9.3	chrII	6423048	+	58	0.4863	15	-1	CE01997 | K03H9.3 | WBGene00019372 | WP:CE01997
UTGB	GTSSWA201348.02	exon	nhr-22	K06A1.4.1	chrII	6449752	-	29	0	12	-1	CE18017 | K06A1.4 | K06A1.4.1 | K06A1.4.2 | WBGene00003621 | WP:CE18017 | nhr-22
UTGB	GTSSWA201349.02	exon	dgk-5	K06A1.6	chrII	6467650	-	10	0	61	-1	CE28048 | K06A1.6 | WBGene00019428 | WP:CE28048 | dgk-5
UTGB	GTSSWA201350.01	exon	T28D9.9	T28D9.9	chrII	6484938	-	10	0	232	-1	CE02073 | T28D9.9 | WBGene00020898 | WP:CE02073
UTGB	GTSSWA201351.01	exon	T28D9.3	T28D9.3d	chrII	6485630	+	67	0.7043	35	-1	CE02068 | CE37155 | CE37156 | CE41704 | CE42701 | T28D9.3 | T28D9.3a | T28D9.3b | T28D9.3b.1 | T28D9.3b.2 | T28D9.3c | T28D9.3d | T28D9.3e | WBGene00020895 | WP:CE02068 | WP:CE37155 | WP:CE37156 | WP:CE41704 | WP:CE42701
UTGB	GTSSWA201352.02	outron	rsp-5	T28D9.2b	chrII	6489991	+	36	0.7852	129	127	CE28094 | CE36572 | CE36573 | CE36574 | CeSC35-2 | T28D9.2 | T28D9.2a | T28D9.2b | T28D9.2c | T28D9.2d | WBGene00004702 | WP:CE28094 | WP:CE36572 | WP:CE36573 | WP:CE36574 | rsp-5 | srp-3
UTGB	GTSSWA201353.01	outron	T28D9.1	T28D9.1.1	chrII	6491417	+	13	0	940	936	CE28092 | T28D9.1 | T28D9.1.1 | T28D9.1.2 | WBGene00020894 | WP:CE28092
UTGB	GTSSWA201354.01	outron	R05G9.3	R05G9.3	chrII	6501485	-	10	0	16	14	CE45026 | R05G9.3 | WBGene00019905 | WP:CE45026
UTGB	GTSSWA201355.01	exon	R05G9.1	R05G9.1	chrII	6502971	+	15	2.098	147	-1	CE21110 | R05G9.1 | WBGene00019903 | WP:CE21110
UTGB	GTSSWA201356.01	outron	toe-2	C56E6.3a	chrII	6521307	-	32	0	1695	1688	C56E6.3 | C56E6.3a | C56E6.3b | CE04275 | CE35261 | WBGene00016971 | WP:CE04275 | WP:CE35261 | toe-2
UTGB	GTSSWA201357.01	outron	F18C5.10	F18C5.10.1	chrII	6561445	-	14	3.073	52	51	CE31790 | F18C5.10 | F18C5.10.1 | F18C5.10.2 | WBGene00017563 | WP:CE31790
UTGB	GTSSWA201358.02	exon	C56C10.4	C56C10.4	chrII	6582991	+	46	0	35	-1	C56C10.4 | CE02569 | WBGene00016962 | WP:CE02569
UTGB	GTSSWA201359.01	outron	C56C10.7	C56C10.7b.1	chrII	6587913	-	185	0.8828	485	481	C56C10.7 | C56C10.7a | C56C10.7a.1 | C56C10.7a.2 | C56C10.7b | C56C10.7b.1 | C56C10.7b.2 | C56C10.7c | C56C10.7c.1 | C56C10.7c.2 | C56C10.7c.3 | CE29739 | CE29740 | CE42577 | WBGene00016964 | WP:CE29739 | WP:CE29740 | WP:CE42577
UTGB	GTSSWA201360.03	outron	icd-1	C56C10.8.1	chrII	6588873	-	44	1.921	283	268	C56C10.8 | C56C10.8.1 | C56C10.8.2 | C56C10.8.3 | CE02573 | WBGene00002045 | WP:CE02573 | icd-1
UTGB	GTSSWA201361.02	outron	vps-32.1	C56C10.3.1	chrII	6589638	+	100	1.564	22	19	C56C10.3 | C56C10.3.1 | C56C10.3.2 | CE02568 | WBGene00016961 | WP:CE02568 | phi-27 | tag-309 | vps-32.1
UTGB	GTSSWA201362.01	outron	C56C10.11	C56C10.11	chrII	6601092	-	11	0.9082	23	12	C56C10.11 | CE28900 | WBGene00016967 | WP:CE28900
UTGB	GTSSWA201363.03	exon	vps-33.2	C56C10.1	chrII	6601225	+	39	2.918	48	-1	C56C10.1 | CE30636 | WBGene00016960 | WP:CE30636 | vps-33.2
UTGB	GTSSWA201364.01	outron	klf-3	F54H5.4b	chrII	6615509	+	18	0.8493	2718	2688	CE01967 | CE37379 | F54H5.4 | F54H5.4a | F54H5.4b | WBGene00003480 | WP:CE01967 | WP:CE37379 | klf-3 | mua-1
UTGB	GTSSWA201365.01	exon	F54H5.3	F54H5.3	chrII	6622127	+	57	1.355	10	-1	CE01966 | F54H5.3 | WBGene00018840 | WP:CE01966
UTGB	GTSSWA201366.01	exon	F54H5.5	F54H5.5	chrII	6627230	-	41	0.5318	53	-1	CE42120 | F54H5.5 | WBGene00018841 | WP:CE42120
UTGB	GTSSWA201367.01	exon	T19D12.5	T19D12.5	chrII	6636168	-	15	0.6746	56	-1	CE04980 | T19D12.5 | WBGene00020580 | WP:CE04980
UTGB	GTSSWA201368.02	outron	T19D12.2	T19D12.2a.1	chrII	6661382	+	16	0	561	442	CE33453 | CE33454 | CE33455 | T19D12.2 | T19D12.2a | T19D12.2a.1 | T19D12.2a.2 | T19D12.2b | T19D12.2c | T19D12.2c.1 | T19D12.2c.2 | WBGene00020577 | WP:CE33453 | WP:CE33454 | WP:CE33455
UTGB	GTSSWA201369.02	outron	H43E16.1	H43E16.1	chrII	6674215	+	410	0.344	49	39	CE19949 | H43E16.1 | WBGene00019273 | WP:CE19949
UTGB	GTSSWA201371.02	outron	tsp-10	T14B4.4a.1	chrII	6718484	+	22	0	45	20	CE02047 | CE39776 | T14B4.4 | T14B4.4a | T14B4.4a.1 | T14B4.4a.2 | T14B4.4b | T14B4.4b.1 | T14B4.4b.2 | T14B4.4b.3 | WBGene00006636 | WP:CE02047 | WP:CE39776 | tsp-10
UTGB	GTSSWA201372.02	exon	T14B4.3	T14B4.3	chrII	6734849	+	23	3.783	41	-1	CE36569 | T14B4.3 | WBGene00020500 | WP:CE36569
UTGB	GTSSWA201373.02	outron	exos-8	F41G3.14.1	chrII	6741609	+	178	1.106	67	22	CE28932 | F41G3.14 | F41G3.14.1 | F41G3.14.2 | WBGene00018305 | WP:CE28932 | exos-8
UTGB	GTSSWA201374.03	exon	F41G3.21.1	F41G3.21.1	chrII	6752884	-	470	0.41	31	-1	CE38602 | F41G3.21 | F41G3.21.1 | F41G3.21.2 | WBGene00044316 | WP:CE38602
UTGB	GTSSWA201375.01	outron	F41G3.1.1	F41G3.1.1	chrII	6765006	+	34	3.003	25	12	CE01282 | F41G3.1 | F41G3.1.1 | F41G3.1.2 | WBGene00018298 | WP:CE01282
UTGB	GTSSWA201376.01	outron	T13C2.7	T13C2.7	chrII	6779330	+	16	0	72	58	CE39407 | T13C2.7 | WBGene00020482 | WP:CE39407
UTGB	GTSSWA201378.04	outron	T13C2.3	T13C2.3b	chrII	6787978	+	79	1.72	1243	1208	CE33451 | CE39406 | T13C2.3 | T13C2.3a | T13C2.3b | T13C2.3b.1 | T13C2.3b.2 | WBGene00020479 | WP:CE33451 | WP:CE39406
UTGB	GTSSWA201379.01	outron	T13C2.2	T13C2.2	chrII	6792184	+	16	0	24	15	CE37046 | T13C2.2 | WBGene00020478 | WP:CE37046
UTGB	GTSSWA201380.01	outron	F31E8.4	F31E8.4	chrII	6800297	-	19	7.47	214	211	CE07167 | F31E8.4 | WBGene00017954 | WP:CE07167
UTGB	GTSSWA201381.01	exon	F31E8.5	F31E8.5	chrII	6807197	-	17	0	49	-1	CE35516 | F31E8.5 | WBGene00017955 | WP:CE35516
UTGB	GTSSWA201382.01	outron	snt-1	F31E8.2b	chrII	6808758	+	24	1.907	2148	2143	CE02711 | CE28229 | F31E8.2 | F31E8.2a | F31E8.2b | WBGene00004921 | WP:CE02711 | WP:CE28229 | ric-2 | snt-1 | syt-1 | syt1 | unc-121
UTGB	GTSSWA201383.01	outron	egl-27	C04A2.3a	chrII	6833984	+	15	0	1035	975	C04A2.3 | C04A2.3a | C04A2.3b | C04A2.3c | C04A2.3c.1 | C04A2.3c.2 | CE31287 | CE31288 | CE33268 | WBGene00001194 | WP:CE31287 | WP:CE31288 | WP:CE33268 | egl-27
UTGB	GTSSWA201385.01	outron	dnj-5	C04A2.7a	chrII	6860112	-	11	0	1901	1885	C04A2.7 | C04A2.7a | C04A2.7b | C04A2.7b.1 | C04A2.7b.2 | C04A2.7c | C04A2.7d | CE29657 | CE29658 | CE29659 | CE31289 | WBGene00001023 | WP:CE29657 | WP:CE29658 | WP:CE29659 | WP:CE31289 | dnj-5
UTGB	GTSSWA201386.01	exon	clhm-1	C44B7.4	chrII	6870960	-	14	1.859	182	-1	C44B7.4 | CE34753 | WBGene00016626 | WP:CE34753 | clhm-1
UTGB	GTSSWA201387.01	exon	C44B7.5	C44B7.5	chrII	6872530	-	19	1.28	9	-1	C44B7.5 | CE02543 | WBGene00016627 | WP:CE02543
UTGB	GTSSWA201388.03	exon	pmp-2	C44B7.9	chrII	6887678	-	167	3.027	34	-1	C44B7.9 | CE02547 | WBGene00004059 | WP:CE02547 | pmp-2
UTGB	GTSSWA201389.03	outron	C44B7.10	C44B7.10.1	chrII	6890368	-	38	0.5205	31	30	C44B7.10 | C44B7.10.1 | C44B7.10.2 | C44B7.10.3 | CE32326 | WBGene00016630 | WP:CE32326
UTGB	GTSSWA201390.01	outron	cyn-10	B0252.4b	chrII	6913381	-	14	0	81	80	B0252.4 | B0252.4a | B0252.4b | CE02420 | CE27567 | WBGene00000886 | WP:CE02420 | WP:CE27567 | cyn-10 | cyp-10
UTGB	GTSSWA201391.01	outron	B0252.8	B0252.8	chrII	6916086	+	69	1.541	48	36	B0252.8 | CE38933 | WBGene00044615 | WP:CE38933
UTGB	GTSSWA201392.01	exon	F22D3.4	F22D3.4	chrII	6925914	-	14	1.219	25	-1	CE39354 | F22D3.4 | WBGene00017700 | WP:CE39354
UTGB	GTSSWA201393.01	outron	F22D3.6	F22D3.6	chrII	6952234	-	31	0	995	994	CE29773 | F22D3.6 | WBGene00017702 | WP:CE29773
UTGB	GTSSWA201394.01	outron	ppp-1	C15F1.4	chrII	6967667	-	15	0.7387	85	79	C15F1.4 | CE23548 | WBGene00004090 | WP:CE23548 | ppp-1
UTGB	GTSSWA201395.01	outron	C15F1.5	C15F1.5b	chrII	6970552	-	16	0	669	645	C15F1.5 | C15F1.5a | C15F1.5b | CE20510 | CE39557 | WBGene00015796 | WP:CE20510 | WP:CE39557
UTGB	GTSSWA201396.02	outron	art-1	C15F1.6.1	chrII	6972276	-	11	0	102	101	C15F1.6 | C15F1.6.1 | C15F1.6.2 | CE20509 | WBGene00000198 | WP:CE20509 | art-1
UTGB	GTSSWA201397.02	outron	sod-1	C15F1.7a	chrII	6974091	-	11	1.253	271	264	C15F1.7 | C15F1.7a | C15F1.7b | C15F1.7b.1 | C15F1.7b.2 | CE20508 | CE23550 | WBGene00004930 | WP:CE20508 | WP:CE23550 | sod-1
UTGB	GTSSWA201398.01	outron	unc-104	C52E12.2a	chrII	6994926	+	14	0	947	64	C52E12.2 | C52E12.2a | C52E12.2b | CE30267 | CE33041 | WBGene00006831 | WP:CE30267 | WP:CE33041 | klp-1 | unc-104
UTGB	GTSSWA201399.01	outron	C52E12.4	C52E12.4	chrII	7024948	-	15	0	2499	2467	C52E12.4 | CE31684 | WBGene00016889 | WP:CE31684
UTGB	GTSSWA201400.01	exon	C52E12.6	C52E12.6	chrII	7022851	+	12	2.397	15	-1	C52E12.6 | CE39340 | WBGene00016890 | WP:CE39340
UTGB	GTSSWA201401.01	outron	C52E12.1	C52E12.1.1	chrII	7025674	+	13	0.7234	79	67	C52E12.1 | C52E12.1.1 | C52E12.1.2 | CE32335 | WBGene00016888 | WP:CE32335
UTGB	GTSSWA201402.02	outron	tcer-1	ZK1127.9a	chrII	7050234	-	31	1.047	223	223	CE28172 | CE28173 | CE29626 | CE33492 | CE33493 | WBGene00022855 | WP:CE28172 | WP:CE28173 | WP:CE29626 | WP:CE33492 | WP:CE33493 | ZK1127.9 | ZK1127.9a | ZK1127.9b | ZK1127.9c | ZK1127.9d | ZK1127.9e | ZK1127.9e.1 | ZK1127.9e.2 | ZK1127.9e.3 | tcer-1
UTGB	GTSSWA201404.01	exon	acs-6	ZK1127.2	chrII	7061938	+	56	0	621	-1	CE07642 | WBGene00022849 | WP:CE07642 | ZK1127.2 | acs-6
UTGB	GTSSWA201406.03	exon	nos-2	ZK1127.1	chrII	7065587	+	858	0.3822	26	-1	CE05121 | WBGene00003784 | WP:CE05121 | ZK1127.1 | ZK1127.1.1 | ZK1127.1.2 | nos-2
UTGB	GTSSWA201405.01	outron	him-14	ZK1127.11	chrII	7069936	-	26	3.498	30	30	CE24714 | WBGene00001872 | WP:CE24714 | ZK1127.11 | him-14
UTGB	GTSSWA201407.01	outron	kat-1	T02G5.8.1	chrII	7073390	+	20	0	364	363	CE29990 | T02G5.8 | T02G5.8.1 | T02G5.8.2 | WBGene00002183 | WP:CE29990 | kat-1
UTGB	GTSSWA201408.01	outron	mmaa-1	T02G5.13a	chrII	7101469	-	48	1.583	366	366	CE04865 | CE31822 | T02G5.13 | T02G5.13a | T02G5.13a.1 | T02G5.13a.2 | T02G5.13b | T02G5.13b.1 | T02G5.13b.2 | T02G5.13b.3 | WBGene00020169 | WP:CE04865 | WP:CE31822 | mmaa-1
UTGB	GTSSWA201409.01	outron	rpl-33	F10E7.7.1	chrII	7102600	+	247	2.183	2908	2902	CE04362 | F10E7.7 | F10E7.7.1 | F10E7.7.2 | F10E7.7.3 | F10E7.7.4 | WBGene00004447 | WP:CE04362 | rpl-33
UTGB	GTSSWA201410.01	outron	F10E7.5	F10E7.5	chrII	7111835	+	34	5.735	96	82	CE04360 | F10E7.5 | WBGene00017347 | WP:CE04360
UTGB	GTSSWA201411.02	exon	spon-1	F10E7.4	chrII	7116558	+	172	0.3952	18	-1	CE32368 | F10E7.4 | WBGene00006893 | WP:CE32368 | spon-1 | vab-13 | ven-3
UTGB	GTSSWA201412.01	outron	F10E7.11	F10E7.11	chrII	7122753	-	16	0	1265	1041	CE32367 | F10E7.11 | WBGene00017352 | WP:CE32367
UTGB	GTSSWA201413.01	outron	T07F8.4	T07F8.4	chrII	7131988	-	40	17.79	32	23	CE13385 | T07F8.4 | WBGene00020320 | WP:CE13385
UTGB	GTSSWA201414.01	outron	gld-3	T07F8.3a	chrII	7132376	+	33	2.474	206	206	CE28652 | CE42163 | T07F8.3 | T07F8.3a | T07F8.3b | WBGene00001597 | WP:CE28652 | WP:CE42163 | gld-3
UTGB	GTSSWA201415.01	outron	fust-1	C27H5.3.1	chrII	7152182	+	22	15.49	458	410	C27H5.3 | C27H5.3.1 | C27H5.3.2 | CE27099 | WBGene00016173 | WP:CE27099 | fust-1
UTGB	GTSSWA201416.01	exon	C27H5.2	C27H5.2a	chrII	7155571	+	72	0.5405	52	-1	C27H5.2 | C27H5.2a | C27H5.2b | C27H5.2c | C27H5.2d | CE27098 | CE29191 | CE32150 | CE32151 | WBGene00016172 | WP:CE27098 | WP:CE29191 | WP:CE32150 | WP:CE32151
UTGB	GTSSWA201417.01	exon	E04F6.4	E04F6.4	chrII	7189363	+	14	0	13	-1	CE01216 | E04F6.4 | WBGene00017124 | WP:CE01216
UTGB	GTSSWA201418.02	outron	acdh-12	E04F6.5b.1	chrII	7195415	-	18	0	711	704	CE01217 | CE36993 | E04F6.5 | E04F6.5a | E04F6.5b | E04F6.5b.1 | E04F6.5b.2 | WBGene00017125 | WP:CE01217 | WP:CE36993 | acdh-12
UTGB	GTSSWA201419.01	exon	maoc-1	E04F6.3	chrII	7196238	+	500	6.858	40	-1	CE01215 | E04F6.3 | WBGene00017123 | WP:CE01215 | maoc-1
UTGB	GTSSWA201420.01	exon	E04F6.6	E04F6.6	chrII	7199374	-	288	3.207	68	-1	CE27909 | E04F6.6 | WBGene00017126 | WP:CE27909
UTGB	GTSSWA201421.01	exon	dhs-7	E04F6.7	chrII	7208152	-	54	1.826	24	-1	CE01219 | E04F6.7 | WBGene00000971 | WP:CE01219 | dhs-7
UTGB	GTSSWA201422.01	outron	E04F6.15	E04F6.15	chrII	7210227	-	331	1.297	17	16	CE27908 | E04F6.15 | WBGene00017131 | WP:CE27908
UTGB	GTSSWA201423.01	outron	E04F6.8	E04F6.8.1	chrII	7211421	-	14	4.876	101	100	CE01220 | E04F6.8 | E04F6.8.1 | E04F6.8.2 | WBGene00017127 | WP:CE01220
UTGB	GTSSWA201424.01	outron	E04F6.10	E04F6.10	chrII	7217054	-	15	0	156	129	CE35267 | E04F6.10 | WBGene00017129 | WP:CE35267
UTGB	GTSSWA201425.01	outron	F32A5.4	F32A5.4a.1	chrII	7228725	+	16	1.619	368	367	CE01274 | CE32640 | F32A5.4 | F32A5.4a | F32A5.4a.1 | F32A5.4a.2 | F32A5.4b | WBGene00017970 | WP:CE01274 | WP:CE32640
UTGB	GTSSWA201426.01	outron	F32A5.3	F32A5.3	chrII	7232670	+	15	0	124	123	CE01273 | F32A5.3 | WBGene00017969 | WP:CE01273
UTGB	GTSSWA201427.01	outron	prx-13	F32A5.6	chrII	7252071	-	25	0.5919	127	117	CE28290 | F32A5.6 | WBGene00004198 | WP:CE28290 | prx-13
UTGB	GTSSWA201428.01	outron	F32A5.8	F32A5.8	chrII	7256059	+	19	0	903	893	CE32642 | F32A5.8 | WBGene00017971 | WP:CE32642
UTGB	GTSSWA201430.01	outron	puf-8	C30G12.7	chrII	7298367	-	60	4.658	197	179	C30G12.7 | CE37486 | WBGene00004244 | WP:CE37486 | puf-8
UTGB	GTSSWA201431.01	outron	cul-4	F45E12.3	chrII	7301882	+	10	0	169	159	CE36545 | F45E12.3 | WBGene00000839 | WP:CE36545 | cul-4
UTGB	GTSSWA201432.01	outron	hsp-4	F43E2.8.1	chrII	7352597	-	41	0.5101	184	140	CE07244 | F43E2.8 | F43E2.8.1 | F43E2.8.2 | WBGene00002008 | WP:CE07244 | hsp-4
UTGB	GTSSWA201433.02	outron	haf-2	F43E2.4	chrII	7356920	-	63	0.5353	591	555	CE07240 | F43E2.4 | WBGene00001812 | WP:CE07240 | haf-2
UTGB	GTSSWA201434.03	outron	msra-1	F43E2.5.1	chrII	7364043	-	275	1.637	71	64	CE07241 | F43E2.5 | F43E2.5.1 | F43E2.5.2 | WBGene00018393 | WP:CE07241 | msra-1
UTGB	GTSSWA201435.05	exon	F43E2.11	F43E2.11	chrII	7371695	-	25	0	481	-1	CE36848 | F43E2.11 | WBGene00018397 | WP:CE36848
UTGB	GTSSWA201436.01	outron	rpb-4	F43E2.2	chrII	7373144	+	37	0	1300	1297	CE07238 | F43E2.2 | WBGene00018391 | WP:CE07238 | rpb-4
UTGB	GTSSWA201437.02	outron	bath-44	C07D10.2b.1	chrII	7394467	+	26	0	429	426	C07D10.2 | C07D10.2a | C07D10.2a.1 | C07D10.2a.2 | C07D10.2b | C07D10.2b.1 | C07D10.2b.2 | CE27057 | CE29072 | WBGene00015567 | WP:CE27057 | WP:CE29072 | bath-44
UTGB	GTSSWA201438.03	outron	C07D10.1	C07D10.1	chrII	7396870	+	29	9.62	2098	2080	C07D10.1 | CE27056 | WBGene00015566 | WP:CE27056
UTGB	GTSSWA201439.01	outron	D1022.3	D1022.3	chrII	7456222	-	17	0.6929	74	44	CE02577 | D1022.3 | WBGene00017022 | WP:CE02577
UTGB	GTSSWA201440.02	exon	D1022.4	D1022.4	chrII	7457242	-	173	1.477	17	-1	CE02578 | D1022.4 | WBGene00017023 | WP:CE02578
UTGB	GTSSWA201442.01	outron	R10H1.1	R10H1.1	chrII	7494532	+	31	1.655	113	71	CE31820 | R10H1.1 | WBGene00019998 | WP:CE31820
UTGB	GTSSWA201443.01	exon	isl-1	R10H1.4	chrII	7496321	+	21	1.895	44	-1	CE31821 | R10H1.4 | WBGene00023416 | WP:CE31821 | isl-1
UTGB	GTSSWA201444.01	exon	rnh-1.1	ZK1290.6	chrII	7525670	+	38	0.7334	28	-1	CE36069 | WBGene00022888 | WP:CE36069 | ZK1290.6 | rnh-1.1
UTGB	GTSSWA201445.01	exon	wrt-1	ZK1290.12	chrII	7531088	+	37	0.4998	27	-1	CE15545 | WBGene00006947 | WP:CE15545 | ZK1290.12 | wrt-1
UTGB	GTSSWA201446.03	exon	wrt-10	ZK1290.8	chrII	7534399	-	62	5.539	20	-1	CE02087 | WBGene00006956 | WP:CE02087 | ZK1290.8 | wrt-10
UTGB	GTSSWA201447.01	exon	ZK1290.13	ZK1290.13	chrII	7535086	+	11	2.104	29	-1	CE32084 | WBGene00022893 | WP:CE32084 | ZK1290.13
UTGB	GTSSWA201448.01	exon	rol-8	ZK1290.3a	chrII	7544040	+	43	0	26	-1	CE29156 | CE32085 | WBGene00004398 | WP:CE29156 | WP:CE32085 | ZK1290.3 | ZK1290.3a | ZK1290.3b | col6 | rol-8
UTGB	GTSSWA201449.01	outron	npp-21	R07G3.3b	chrII	7599072	+	28	12.78	518	516	CE37543 | CE37544 | CE40208 | R07G3.3 | R07G3.3a | R07G3.3b | R07G3.3c | WBGene00019940 | WP:CE37543 | WP:CE37544 | WP:CE40208 | npp-21
UTGB	GTSSWA201450.01	exon	R07G3.6	R07G3.6	chrII	7605273	-	12	5.193	113	-1	CE02025 | R07G3.6 | WBGene00019942 | WP:CE02025
UTGB	GTSSWA201451.01	exon	lips-17	R07G3.2	chrII	7608190	+	47	3.537	23	-1	CE36003 | R07G3.2 | WBGene00019939 | WP:CE36003 | lips-17
UTGB	GTSSWA201452.01	outron	R07G3.7	R07G3.7b.1	chrII	7615458	-	14	0	2555	1856	CE36004 | CE36005 | R07G3.7 | R07G3.7a | R07G3.7b | R07G3.7b.1 | R07G3.7b.2 | R07G3.7b.3 | WBGene00019943 | WP:CE36004 | WP:CE36005
UTGB	GTSSWA201453.01	outron	F18A1.6	F18A1.6b.1	chrII	7662298	-	13	0.8693	105	82	CE04406 | CE27977 | F18A1.6 | F18A1.6a | F18A1.6b | F18A1.6b.1 | F18A1.6b.2 | WBGene00017547 | WP:CE04406 | WP:CE27977
UTGB	GTSSWA201454.01	outron	rpa-1	F18A1.5	chrII	7664056	+	10	0	463	453	CE04405 | F18A1.5 | WBGene00017546 | WP:CE04405 | rpa-1
UTGB	GTSSWA201455.01	exon	F18A1.1	F18A1.1	chrII	7684124	+	12	2.221	1095	-1	CE04401 | F18A1.1 | WBGene00017545 | WP:CE04401
UTGB	GTSSWA201456.01	exon	F18A1.8	F18A1.8	chrII	7690480	-	26	1.733	50	-1	CE04408 | F18A1.8 | WBGene00017549 | WP:CE04408
UTGB	GTSSWA201457.01	outron	nhx-2	B0495.4	chrII	7694801	-	14	3.602	978	917	B0495.4 | CE29549 | WBGene00003730 | WP:CE29549 | nhx-2
UTGB	GTSSWA201458.02	outron	B0495.2	B0495.2	chrII	7699185	+	119	0.583	52	41	B0495.2 | CE01761 | WBGene00015203 | WP:CE01761
UTGB	GTSSWA201459.01	outron	B0495.7	B0495.7.1	chrII	7705182	-	13	0	27	24	B0495.7 | B0495.7.1 | B0495.7.2 | B0495.7.3 | CE29550 | WBGene00015206 | WP:CE29550
UTGB	GTSSWA201460.02	exon	B0495.9	B0495.9	chrII	7708643	-	139	0.6528	14	-1	B0495.9 | CE01767 | WBGene00015208 | WP:CE01767
UTGB	GTSSWA201461.01	exon	cpna-2	B0228.4c	chrII	7724117	+	11	0	710	-1	B0228.4 | B0228.4a | B0228.4b | B0228.4c | B0228.4d | B0228.4e | CE31282 | CE37471 | CE39660 | CE44996 | WBGene00015061 | WP:CE31282 | WP:CE37471 | WP:CE39660 | WP:CE44996 | cpna-2 | tag-308
UTGB	GTSSWA201462.01	exon	B0228.1	B0228.1	chrII	7755932	+	653	1.498	6	-1	B0228.1 | CE41748 | WBGene00015059 | WP:CE41748
UTGB	GTSSWA201463.01	outron	B0228.7	B0228.7.1	chrII	7758369	-	16	0	60	48	B0228.7 | B0228.7.1 | B0228.7.2 | CE34630 | WBGene00015064 | WP:CE34630
UTGB	GTSSWA201464.01	exon	C06A8.6	C06A8.6	chrII	7772507	+	31	0	38	-1	C06A8.6 | CE02457 | WBGene00015516 | WP:CE02457
UTGB	GTSSWA201465.03	outron	C06A8.2	C06A8.2	chrII	7781188	-	51	4.285	48	32	C06A8.2 | CE31292 | WBGene00015513 | WP:CE31292
UTGB	GTSSWA201466.03	outron	spdl-1	C06A8.5	chrII	7781286	+	50	0	231	210	C06A8.5 | CE02456 | WBGene00015515 | WP:CE02456 | spdl-1
UTGB	GTSSWA201467.02	outron	skr-17	C06A8.4	chrII	7783765	+	14	8.753	43	18	C06A8.4 | CE02455 | WBGene00004823 | WP:CE02455 | skr-17
UTGB	GTSSWA201468.05	exon	C06A8.3	C06A8.3	chrII	7790524	+	4377	1.581	38	-1	C06A8.3 | CE02454 | WBGene00015514 | WP:CE02454
UTGB	GTSSWA201469.03	outron	cex-2	T09A5.1a	chrII	7835106	-	28	0	35	33	CE41840 | CE41841 | T09A5.1 | T09A5.1a | T09A5.1b | WBGene00023408 | WP:CE41840 | WP:CE41841 | cex-2
UTGB	GTSSWA201470.03	exon	T09A5.8	T09A5.8	chrII	7857460	-	24	1.756	60	-1	CE01089 | T09A5.8 | WBGene00011636 | WP:CE01089
UTGB	GTSSWA201471.01	outron	T09A5.15	T09A5.15	chrII	7857796	+	20	2.155	94	88	CE35004 | T09A5.15 | WBGene00011641 | WP:CE35004
UTGB	GTSSWA201472.01	outron	ostb-1	T09A5.11.2	chrII	7863963	+	255	8.553	475	474	CE01081 | T09A5.11 | T09A5.11.1 | T09A5.11.2 | T09A5.11.3 | WBGene00011638 | WP:CE01081 | ostb-1
UTGB	GTSSWA201473.01	outron	T01H3.3	T01H3.3.1	chrII	7874086	-	28	1.201	279	262	CE44933 | T01H3.3 | T01H3.3.1 | T01H3.3.2 | WBGene00011349 | WP:CE44933
UTGB	GTSSWA201474.04	outron	T01H3.2	T01H3.2	chrII	7878259	-	12	5.359	340	334	CE23938 | T01H3.2 | T01H3.2.1 | T01H3.2.2 | WBGene00011348 | WP:CE23938
UTGB	GTSSWA201475.01	outron	vha-4	T01H3.1.1	chrII	7879410	-	13	16.24	166	163	CE03595 | T01H3.1 | T01H3.1.1 | T01H3.1.2 | WBGene00006913 | WP:CE03595 | vha-4
UTGB	GTSSWA201476.01	outron	ptc-1	ZK675.1.1	chrII	7892816	+	13	0	380	344	CE42497 | WBGene00004208 | WP:CE42497 | ZK675.1 | ZK675.1.1 | ZK675.1.2 | ptc-1
UTGB	GTSSWA201477.05	outron	rev-1	ZK675.2	chrII	7900160	+	20	2.215	418	400	CE01721 | WBGene00014066 | WP:CE01721 | ZK675.2 | rev-1
UTGB	GTSSWA201478.01	exon	ZK675.4	ZK675.4	chrII	7911237	+	13	2.17	17	-1	CE01723 | WBGene00014067 | WP:CE01723 | ZK675.4
UTGB	GTSSWA201479.01	exon	ZK669.2	ZK669.2	chrII	7940950	-	17	0	2435	-1	CE16741 | WBGene00014052 | WP:CE16741 | ZK669.2
UTGB	GTSSWA201480.01	outron	ZK669.3	ZK669.3	chrII	7941056	+	44	2.086	46	30	CE01114 | WBGene00014053 | WP:CE01114 | ZK669.3
UTGB	GTSSWA201481.01	outron	ZK669.4	ZK669.4.1	chrII	7945178	-	10	0.9893	71	40	CE01115 | WBGene00014054 | WP:CE01115 | ZK669.4 | ZK669.4.1 | ZK669.4.2
UTGB	GTSSWA201482.01	outron	DH11.2	DH11.2	chrII	8012430	+	46	0.9702	336	317	CE27900 | DH11.2 | WBGene00008436 | WP:CE27900
UTGB	GTSSWA201483.02	outron	zyg-11	C08B11.1	chrII	8015491	+	42	0	2132	2120	C08B11.1 | CE01471 | WBGene00006996 | WP:CE01471 | zyg-11
UTGB	GTSSWA201484.01	outron	C08B11.3	C08B11.3	chrII	8028801	-	16	0	1127	1113	C08B11.3 | C08B11.3.1 | C08B11.3.2 | CE01473 | WBGene00007433 | WP:CE01473
UTGB	GTSSWA201485.01	outron	nrf-6	C08B11.4	chrII	8032673	-	43	0.482	39	33	C08B11.4 | C08B11.4.1 | C08B11.4.2 | CE27798 | WBGene00003813 | WP:CE27798 | nrf-6
UTGB	GTSSWA201486.01	exon	ubh-4	C08B11.7	chrII	8039462	-	12	0	100	-1	C08B11.7 | CE36913 | WBGene00006724 | WP:CE36913 | ubh-4
UTGB	GTSSWA201487.02	outron	C08B11.8	C08B11.8	chrII	8039779	+	31	7.266	161	159	C08B11.8 | CE01478 | WBGene00007435 | WP:CE01478
UTGB	GTSSWA201488.01	outron	T05H10.7	T05H10.7b.1	chrII	8073312	-	12	0	2695	2693	CE01644 | CE03637 | T05H10.7 | T05H10.7a | T05H10.7b | T05H10.7b.1 | T05H10.7b.2 | T05H10.7b.3 | WBGene00011511 | WP:CE01644 | WP:CE03637
UTGB	GTSSWA201489.01	exon	K02C4.2	K02C4.2	chrII	8075375	+	17	0	335	-1	CE41246 | K02C4.2 | WBGene00010501 | WP:CE41246
UTGB	GTSSWA201490.01	outron	K02C4.5	K02C4.5	chrII	8078343	+	57	0	44	28	CE32688 | K02C4.5 | WBGene00010503 | WP:CE32688
UTGB	GTSSWA201491.02	outron	sfxn-5	C41C4.10	chrII	8105072	-	27	1.089	90	89	C41C4.10 | C41C4.10.1 | C41C4.10.2 | CE37882 | WBGene00044049 | WP:CE37882 | sfxn-5
UTGB	GTSSWA201492.01	exon	C41C4.1	C41C4.1	chrII	8107198	-	42	1.372	324	-1	C41C4.1 | CE01516 | WBGene00008050 | WP:CE01516
UTGB	GTSSWA201493.01	outron	ire-1	C41C4.4	chrII	8124984	-	15	3.957	213	150	C41C4.4 | CE35836 | WBGene00002147 | WP:CE35836 | ire-1
UTGB	GTSSWA201494.05	outron	cdc-48.2	C41C4.8.1	chrII	8137694	+	33	3.032	747	732	C41C4.8 | C41C4.8.1 | C41C4.8.2 | C41C4.8.3 | CE05402 | WBGene00008053 | WP:CE05402 | cdc-48.2
UTGB	GTSSWA201495.01	outron	F10B5.8	F10B5.8	chrII	8143336	-	375	15.28	108	86	CE32859 | F10B5.8 | WBGene00008642 | WP:CE32859
UTGB	GTSSWA201496.06	outron	rpl-10	F10B5.1.1	chrII	8143788	+	107	2.008	26	23	CE01543 | F10B5.1 | F10B5.1.1 | F10B5.1.2 | WBGene00004421 | WP:CE01543 | rpl-10
UTGB	GTSSWA201497.01	outron	pch-2	F10B5.5	chrII	8158156	+	16	3.09	131	123	CE01547 | F10B5.5 | WBGene00008641 | WP:CE01547 | pch-2
UTGB	GTSSWA201498.01	exon	rrf-3	F10B5.7	chrII	8162425	+	43	0	63	-1	CE02178 | F10B5.7 | WBGene00004510 | WP:CE02178 | rrf-3
UTGB	GTSSWA201499.01	exon	T05C12.3	T05C12.3	chrII	8173490	-	94	1.443	20	-1	CE02315 | T05C12.3 | WBGene00011467 | WP:CE02315
UTGB	GTSSWA201500.04	outron	cct-1	T05C12.7.1	chrII	8185230	+	26	0	146	143	CE02319 | T05C12.7 | T05C12.7.1 | T05C12.7.2 | WBGene00000377 | WP:CE02319 | cct-1 | tcp-1
UTGB	GTSSWA201501.03	exon	M110.3	M110.3	chrII	8216455	-	85	1.135	96	-1	CE02276 | M110.3 | WBGene00010913 | WP:CE02276
UTGB	GTSSWA201502.02	outron	ifg-1	M110.4b	chrII	8216546	+	22	0	640	617	CE02277 | CE35745 | CE42852 | CE42878 | CE42917 | M110.4 | M110.4a | M110.4b | M110.4c | M110.4c.1 | M110.4c.2 | M110.4d | M110.4e | WBGene00002066 | WP:CE02277 | WP:CE35745 | WP:CE42852 | WP:CE42878 | WP:CE42917 | ifg-1
UTGB	GTSSWA201503.01	exon	M110.9	M110.9	chrII	8228771	+	10	0	2479	-1	CE34949 | M110.9 | WBGene00010917 | WP:CE34949
UTGB	GTSSWA201504.01	exon	M110.7	M110.7	chrII	8232720	+	12	0	567	-1	CE43244 | M110.7 | WBGene00010915 | WP:CE43244
UTGB	GTSSWA201505.02	exon	F35C11.2	F35C11.2	chrII	8246322	-	84	0.421	53	-1	CE02209 | F35C11.2 | WBGene00009401 | WP:CE02209
UTGB	GTSSWA201506.01	exon	F35C11.3	F35C11.3	chrII	8246726	+	25	0	118	-1	CE02210 | F35C11.3 | WBGene00009402 | WP:CE02210
UTGB	GTSSWA201507.01	exon	F35C11.4	F35C11.4	chrII	8249853	+	38	0.5892	25	-1	CE03284 | F35C11.4 | WBGene00009403 | WP:CE03284
UTGB	GTSSWA201508.02	outron	K01C8.1	K01C8.1.1	chrII	8264863	+	31	0	271	258	CE36943 | K01C8.1 | K01C8.1.1 | K01C8.1.2 | K01C8.1.3 | K01C8.1.4 | WBGene00010456 | WP:CE36943
UTGB	GTSSWA201509.02	outron	tdc-1	K01C8.3b	chrII	8270226	+	114	1.135	313	303	CE21011 | CE28344 | K01C8.3 | K01C8.3a | K01C8.3b | WBGene00006562 | WP:CE21011 | WP:CE28344 | adc-1 | tdc-1
UTGB	GTSSWA201511.02	outron	nst-1	K01C8.9	chrII	8284060	-	36	0	939	919	CE02270 | K01C8.9 | K01C8.9.1 | K01C8.9.2 | WBGene00003821 | WP:CE02270 | nst-1
UTGB	GTSSWA201512.01	outron	cct-4	K01C8.10.1	chrII	8283446	+	10	8.015	154	154	CE02262 | K01C8.10 | K01C8.10.1 | K01C8.10.2 | K01C8.10.3 | WBGene00000379 | WP:CE02262 | cct-4
UTGB	GTSSWA201513.01	exon	C26D10.3	C26D10.3	chrII	8325339	+	27	9.23	59	-1	C26D10.3 | CE44316 | WBGene00007744 | WP:CE44316
UTGB	GTSSWA201514.01	outron	hel-1	C26D10.2a	chrII	8328996	-	221	10.8	194	193	C26D10.2 | C26D10.2a | C26D10.2b | C26D10.2b.1 | C26D10.2b.2 | CE03025 | CE32593 | WBGene00001840 | WP:CE03025 | WP:CE32593 | hel | hel-1
UTGB	GTSSWA201515.01	outron	C26D10.7	C26D10.7	chrII	8333902	+	14	0	124	120	C26D10.7 | CE36985 | WBGene00023420 | WP:CE36985
UTGB	GTSSWA201516.01	exon	col-77	M195.1	chrII	8359310	-	611	0.6985	32	-1	CE03514 | M195.1 | WBGene00000653 | WP:CE03514 | col-77
UTGB	GTSSWA201517.01	outron	M195.2	M195.2	chrII	8358403	+	64	0	2679	2619	CE34950 | M195.2 | WBGene00010948 | WP:CE34950
UTGB	GTSSWA201518.10	exon	F49E12.9	F49E12.9a	chrII	8388230	+	995	1.465	37	-1	CE03385 | CE40961 | F49E12.9 | F49E12.9a | F49E12.9b | F49E12.9c | WBGene00009902 | WP:CE03385 | WP:CE40961
UTGB	GTSSWA201519.01	exon	F49E12.10	F49E12.10	chrII	8390975	+	10	0	44	-1	CE03386 | F49E12.10 | WBGene00009903 | WP:CE03386
UTGB	GTSSWA201520.01	outron	F49E12.1	F49E12.1	chrII	8405306	-	27	1.845	530	526	CE03378 | F49E12.1 | WBGene00009897 | WP:CE03378
UTGB	GTSSWA201521.01	outron	acp-2	F14E5.4.1	chrII	8431989	-	17	0	144	127	CE03207 | F14E5.4 | F14E5.4.1 | F14E5.4.2 | WBGene00008802 | WP:CE03207 | acp-2
UTGB	GTSSWA201522.01	exon	acp-3	F14E5.3	chrII	8437118	-	32	0	51	-1	CE28915 | F14E5.3 | WBGene00008801 | WP:CE28915 | acp-3
UTGB	GTSSWA201523.02	exon	lips-10	F14E5.5	chrII	8439088	+	1303	3.075	40	-1	CE03208 | F14E5.5 | WBGene00008803 | WP:CE03208 | lips-10
UTGB	GTSSWA201524.01	exon	F22B5.5	F22B5.5	chrII	8454544	-	36	1.585	21	-1	CE35861 | F22B5.5 | WBGene00009043 | WP:CE35861
UTGB	GTSSWA201525.01	exon	F22B5.6	F22B5.6	chrII	8456726	-	10	0	325	-1	CE44304 | F22B5.6 | WBGene00009044 | WP:CE44304
UTGB	GTSSWA201526.03	outron	zyg-9	F22B5.7	chrII	8456851	+	57	0.9085	901	898	CE20707 | F22B5.7 | WBGene00006994 | WP:CE20707 | zyg-9
UTGB	GTSSWA201527.02	outron	fars-3	F22B5.9	chrII	8464755	+	17	2.73	28	24	CE20708 | F22B5.9 | F22B5.9.1 | F22B5.9.2 | WBGene00001498 | WP:CE20708 | fars-3 | frs-2
UTGB	GTSSWA201528.01	exon	M05D6.1	M05D6.1	chrII	8475319	-	99	0	116	-1	CE03499 | M05D6.1 | WBGene00010874 | WP:CE03499
UTGB	GTSSWA201529.03	exon	M05D6.3	M05D6.3	chrII	8475731	+	72	1.579	54	-1	CE03501 | M05D6.3 | WBGene00010876 | WP:CE03501
UTGB	GTSSWA201530.03	outron	M05D6.6	M05D6.6.2	chrII	8483469	-	56	1.365	273	268	CE03504 | M05D6.6 | M05D6.6.1 | M05D6.6.2 | M05D6.6.3 | WBGene00010879 | WP:CE03504
UTGB	GTSSWA201531.01	outron	gbh-2	M05D6.7	chrII	8485821	+	12	0.8493	48	43	CE35896 | M05D6.7 | WBGene00001523 | WP:CE35896 | gbh-2
UTGB	GTSSWA201532.01	exon	T13H5.3	T13H5.3	chrII	8520842	+	44	0.5009	19	-1	CE36953 | T13H5.3 | WBGene00011757 | WP:CE36953
UTGB	GTSSWA201533.01	exon	W01C9.4	W01C9.4	chrII	8545615	+	112	0.5543	20	-1	CE02370 | W01C9.4 | WBGene00012177 | WP:CE02370
UTGB	GTSSWA201534.02	outron	iff-2	F54C9.1.1	chrII	8561306	-	34	2.25	419	410	CE02249 | F54C9.1 | F54C9.1.1 | F54C9.1.2 | F54C9.1.3 | WBGene00002065 | WP:CE02249 | iff-2
UTGB	GTSSWA201535.01	outron	F54C9.3	F54C9.3	chrII	8566881	-	11	3.254	93	92	CE02253 | F54C9.3 | WBGene00010041 | WP:CE02253
UTGB	GTSSWA201536.02	exon	col-38	F54C9.4	chrII	8569019	-	391	1.134	18	-1	CE20864 | F54C9.4 | WBGene00000615 | WP:CE20864 | col-38
UTGB	GTSSWA201537.01	outron	rpl-5	F54C9.5.1	chrII	8568371	+	200	0	1493	1487	CE02255 | F54C9.5 | F54C9.5.1 | F54C9.5.2 | WBGene00004416 | WP:CE02255 | rpl-5
UTGB	GTSSWA201539.01	outron	F54C9.9	F54C9.9	chrII	8577356	+	26	4.346	631	624	CE20865 | F54C9.9 | WBGene00010044 | WP:CE20865
UTGB	GTSSWA201540.02	exon	cpf-1	F28C6.3	chrII	8602410	-	410	0.8682	68	-1	CE03274 | F28C6.3 | WBGene00000773 | WP:CE03274 | cpf-1
UTGB	GTSSWA201541.01	outron	rpl-26	F28C6.7a.1	chrII	8602511	+	20	3.867	213	207	CE03278 | CE20731 | CE32883 | F28C6.7 | F28C6.7a | F28C6.7a.1 | F28C6.7a.2 | F28C6.7a.3 | F28C6.7b | F28C6.7c | WBGene00004440 | WP:CE03278 | WP:CE20731 | WP:CE32883 | rpl-26
UTGB	GTSSWA201542.02	outron	suf-1	F28C6.6.1	chrII	8603768	+	25	2.237	24	21	CE03277 | F28C6.6 | F28C6.6.1 | F28C6.6.2 | WBGene00006307 | WP:CE03277 | suf-1
UTGB	GTSSWA201543.01	exon	F28C6.10	F28C6.10	chrII	8607875	+	10	1.497	57	-1	CE09747 | F28C6.10 | WBGene00009209 | WP:CE09747
UTGB	GTSSWA201544.01	exon	T22C8.6	T22C8.6	chrII	8630053	-	20	0	50	-1	CE41024 | T22C8.6 | WBGene00011927 | WP:CE41024
UTGB	GTSSWA201545.01	outron	pyr-1	D2085.1	chrII	8650126	+	15	0	940	915	CE41886 | D2085.1 | WBGene00004259 | WP:CE41886 | pyr-1
UTGB	GTSSWA201546.03	outron	atg-10	D2085.2	chrII	8658420	+	20	14.43	658	652	CE34785 | D2085.2 | WBGene00008427 | WP:CE34785 | atg-10
UTGB	GTSSWA201547.01	exon	D2085.6	D2085.6	chrII	8661627	-	72	1.262	106	-1	CE03109 | D2085.6 | WBGene00008431 | WP:CE03109
UTGB	GTSSWA201548.02	outron	D2085.3	D2085.3	chrII	8661705	+	91	0.4535	106	96	CE03107 | D2085.3 | WBGene00008428 | WP:CE03107
UTGB	GTSSWA201549.01	outron	C34C6.4	C34C6.4	chrII	8699245	-	10	0	386	384	C34C6.4 | CE03052 | WBGene00007917 | WP:CE03052
UTGB	GTSSWA201550.03	outron	sphk-1	C34C6.5b.1	chrII	8701612	-	20	0	161	125	C34C6.5 | C34C6.5a | C34C6.5b | C34C6.5b.1 | C34C6.5b.2 | C34C6.5b.3 | C34C6.5c | CE03053 | CE35833 | CE44377 | WBGene00007918 | WP:CE03053 | WP:CE35833 | WP:CE44377 | sphk-1 | tag-274
UTGB	GTSSWA201551.02	outron	T01B7.5	T01B7.5a	chrII	8716547	+	32	2.783	230	219	CE23934 | CE38216 | T01B7.5 | T01B7.5a | T01B7.5a.1 | T01B7.5a.2 | T01B7.5b | WBGene00011311 | WP:CE23934 | WP:CE38216
UTGB	GTSSWA201552.01	exon	T01B7.8	T01B7.8	chrII	8737485	-	70	1.934	29	-1	CE03592 | T01B7.8 | WBGene00011313 | WP:CE03592
UTGB	GTSSWA201553.01	outron	K08F8.1	K08F8.1b.2	chrII	8743537	+	13	0	522	470	CE03467 | CE32906 | CE35895 | CE37257 | CE37258 | K08F8.1 | K08F8.1a | K08F8.1b | K08F8.1b.1 | K08F8.1b.2 | K08F8.1b.3 | K08F8.1c | K08F8.1c.1 | K08F8.1c.2 | K08F8.1c.3 | K08F8.1c.4 | K08F8.1d | K08F8.1d.1 | K08F8.1d.2 | K08F8.1e | K08F8.1e.1 | K08F8.1e.2 | K08F8.1e.3 | K08F8.1e.4 | WBGene00010681 | WP:CE03467 | WP:CE32906 | WP:CE35895 | WP:CE37257 | WP:CE37258
UTGB	GTSSWA201554.01	outron	atf-2	K08F8.2	chrII	8749356	+	15	0	2559	2559	CE03468 | K08F8.2 | WBGene00000220 | WP:CE03468 | atf-2
UTGB	GTSSWA201555.03	exon	pah-1	K08F8.4	chrII	8765066	-	1899	2.134	67	-1	AAH/1 | CE21050 | K08F8.4 | WBGene00000240 | WP:CE21050 | bas-2 | pah-1
UTGB	GTSSWA201556.04	exon	sgn-1	F07H5.2	chrII	8783561	-	59	0	84	-1	CE05569 | F07H5.2 | WBGene00004790 | WP:CE05569 | sgn-1
UTGB	GTSSWA201557.01	outron	F07H5.13	F07H5.13	chrII	8787843	+	45	15.32	2782	2647	CE29037 | F07H5.13 | WBGene00008563 | WP:CE29037
UTGB	GTSSWA201558.05	exon	pho-13	F07H5.9a	chrII	8806890	-	96	0.4427	61	-1	CE35850 | F07H5.9 | F07H5.9a | F07H5.9b | WBGene00008560 | WP:CE35850 | pho-13
UTGB	GTSSWA201559.01	outron	F46C5.9	F46C5.9	chrII	8813604	-	47	0.4929	2956	2948	CE10584 | F46C5.9 | WBGene00009784 | WP:CE10584
UTGB	GTSSWA201560.04	outron	rer-1	F46C5.8.1	chrII	8811279	+	74	1.231	22	17	CE03349 | F46C5.8 | F46C5.8.1 | F46C5.8.2 | WBGene00009783 | WP:CE03349 | rer-1
UTGB	GTSSWA201561.01	exon	F46C5.10	F46C5.10	chrII	8818312	-	68	2.508	50	-1	CE32891 | F46C5.10 | WBGene00009785 | WP:CE32891
UTGB	GTSSWA201562.01	exon	F46C5.1	F46C5.1	chrII	8821125	-	68	0	33	-1	CE03343 | F46C5.1 | WBGene00009778 | WP:CE03343
UTGB	GTSSWA201563.01	outron	F46C5.4	F46C5.4	chrII	8835990	+	12	0	375	107	CE44350 | F46C5.4 | WBGene00009780 | WP:CE44350
UTGB	GTSSWA201564.01	exon	F46C5.7	F46C5.7	chrII	8839291	+	10	1.979	27	-1	CE03348 | F46C5.7 | WBGene00009782 | WP:CE03348
UTGB	GTSSWA201565.03	exon	T14D7.1	T14D7.1	chrII	8846224	+	33	0.5679	21	-1	CE23985 | T14D7.1 | WBGene00011767 | WP:CE23985
UTGB	GTSSWA201566.01	exon	snb-6	T14D7.3	chrII	8859598	-	29	0	56	-1	CE13646 | T14D7.3 | WBGene00044062 | WP:CE13646 | snb-6 | tag-212
UTGB	GTSSWA201567.01	outron	T07D4.5	T07D4.5	chrII	8884315	-	18	4.006	63	60	CE41015 | T07D4.5 | WBGene00045407 | WP:CE41015
UTGB	GTSSWA201568.01	outron	B0457.6	B0457.6	chrII	8922335	+	11	0.9082	37	35	B0457.6 | CE34638 | WBGene00007180 | WP:CE34638
UTGB	GTSSWA201569.07	exon	B0457.2	B0457.2	chrII	8926485	-	91	0.5647	17	-1	B0457.2 | CE32790 | WBGene00007178 | WP:CE32790
UTGB	GTSSWA201570.01	outron	T21B10.1	T21B10.1	chrII	8929405	+	160	6.459	368	356	CE03683 | T21B10.1 | T21B10.1.1 | T21B10.1.2 | WBGene00011883 | WP:CE03683
UTGB	GTSSWA201571.01	exon	enol-1	T21B10.2c.1	chrII	8930903	+	16	0	20	-1	CE03684 | CE32730 | CE36954 | T21B10.2 | T21B10.2a | T21B10.2a.1 | T21B10.2a.2 | T21B10.2b | T21B10.2b.1 | T21B10.2b.2 | T21B10.2c | T21B10.2c.1 | T21B10.2c.2 | WBGene00011884 | WP:CE03684 | WP:CE32730 | WP:CE36954 | enol-1
UTGB	GTSSWA201572.01	outron	T21B10.3	T21B10.3	chrII	8933539	+	10	0	789	763	CE23993 | T21B10.3 | T21B10.3.1 | T21B10.3.2 | WBGene00011885 | WP:CE23993
UTGB	GTSSWA201573.02	outron	T21B10.4	T21B10.4	chrII	8940765	+	89	0.4995	55	49	CE03686 | T21B10.4 | WBGene00011886 | WP:CE03686
UTGB	GTSSWA201574.01	exon	cutl-15	T21B10.6	chrII	8947564	-	10	0	59	-1	CE33835 | T21B10.6 | T21B10.6.1 | T21B10.6.2 | WBGene00011888 | WP:CE33835 | cutl-15
UTGB	GTSSWA201575.01	outron	cal-2	C18E9.1	chrII	8959899	+	10	0	755	735	C18E9.1 | CE34702 | WBGene00000286 | WP:CE34702 | cal-2
UTGB	GTSSWA201576.02	outron	C18E9.4	C18E9.4	chrII	8964885	-	14	0	75	74	C18E9.4 | CE05296 | WBGene00007684 | WP:CE05296
UTGB	GTSSWA201577.01	outron	C18E9.2	C18E9.2a	chrII	8964988	+	322	4.737	106	60	C18E9.2 | C18E9.2a | C18E9.2b | CE34703 | WBGene00007683 | WP:CE34703
UTGB	GTSSWA201578.01	exon	szy-20	C18E9.3a	chrII	8969538	-	21	0	144	-1	C18E9.3 | C18E9.3a | C18E9.3b | C18E9.3c | C18E9.3c.1 | C18E9.3c.2 | C18E9.3c.3 | C18E9.3d | C18E9.3e | C18E9.3e.1 | C18E9.3e.2 | C18E9.3e.3 | C18E9.3f | C18E9.3f.1 | C18E9.3f.2 | C18E9.3g | CE38277 | CE40906 | CE40907 | CE40908 | CE42499 | CE42669 | CE44364 | WBGene00004105 | WP:CE38277 | WP:CE40906 | WP:CE40907 | WP:CE40908 | WP:CE42499 | WP:CE42669 | WP:CE44364 | pqn-14 | szy-20
UTGB	GTSSWA201579.01	exon	C18E9.5	C18E9.5	chrII	8969939	+	81	14.64	69	-1	C18E9.5 | CE42952 | WBGene00007685 | WP:CE42952
UTGB	GTSSWA201580.01	outron	tomm-40	C18E9.6	chrII	8973942	-	13	0	456	456	C18E9.6 | CE05298 | WBGene00007686 | WP:CE05298 | tomm-40
UTGB	GTSSWA201581.03	exon	F44G4.3	F44G4.3	chrII	8997540	-	265	1.106	78	-1	CE02230 | F44G4.3 | WBGene00009713 | WP:CE02230
UTGB	GTSSWA201582.03	outron	tdp-1	F44G4.4a	chrII	8997658	+	18	0	95	88	CE02231 | CE36440 | CE44236 | F44G4.4 | F44G4.4a | F44G4.4b | F44G4.4c | WBGene00006514 | WP:CE02231 | WP:CE36440 | WP:CE44236 | tag-169 | tdp-1
UTGB	GTSSWA201583.01	exon	F44G4.5	F44G4.5	chrII	9000324	-	37	0.642	31	-1	CE02232 | F44G4.5 | WBGene00009714 | WP:CE02232
UTGB	GTSSWA201584.02	exon	T24B8.7	T24B8.7b	chrII	9054648	-	19	0.818	1520	-1	CE43334 | CE43363 | T24B8.7 | T24B8.7a | T24B8.7b | WBGene00011980 | WP:CE43334 | WP:CE43363
UTGB	GTSSWA201585.04	outron	T24B8.1.1	T24B8.1.1	chrII	9057289	-	24	1.129	288	283	CE03709 | CE43313 | T24B8.1 | T24B8.1.1 | T24B8.1.2 | T24B8.1.3 | T24B8.1a | T24B8.1a.1 | T24B8.1a.2 | T24B8.1b | T24B8.1b.1 | T24B8.1b.2 | T24B8.1b.3 | T24B8.1b.4 | WBGene00004446 | WP:CE03709 | WP:CE43313 | rpl-32
UTGB	GTSSWA201586.02	outron	T24B8.3	T24B8.3b.1	chrII	9061576	-	19	0	553	518	CE35910 | CE35911 | T24B8.3 | T24B8.3a | T24B8.3a.1 | T24B8.3a.2 | T24B8.3a.3 | T24B8.3b | T24B8.3b.1 | T24B8.3b.2 | WBGene00011977 | WP:CE35910 | WP:CE35911
UTGB	GTSSWA201587.03	exon	T24B8.5	T24B8.5	chrII	9083060	-	2502	1.707	8	-1	CE41161 | T24B8.5 | WBGene00011979 | WP:CE41161
UTGB	GTSSWA201588.02	outron	T24H10.1	T24H10.1	chrII	9098013	+	86	0	1284	1279	CE03726 | T24H10.1 | WBGene00012000 | WP:CE03726
UTGB	GTSSWA201589.01	exon	C16D2.1	C16D2.1a	chrII	9132084	+	21	0.6318	50	-1	C16D2.1 | C16D2.1a | C16D2.1b | C16D2.1c | CE15622 | CE41203 | CE41204 | WBGene00007633 | WP:CE15622 | WP:CE41203 | WP:CE41204
UTGB	GTSSWA201590.01	outron	rhy-1	W07A12.7	chrII	9160737	+	11	0	568	562	CE20163 | W07A12.7 | WBGene00012324 | WP:CE20163 | rhy-1 | tag-323
UTGB	GTSSWA201591.03	exon	W07A12.8	W07A12.8	chrII	9165690	-	12	3.023	66	-1	CE41169 | W07A12.8 | WBGene00012325 | WP:CE41169
UTGB	GTSSWA201592.01	outron	ZK1067.3	ZK1067.3	chrII	9222835	+	16	2.798	361	355	CE33012 | WBGene00014209 | WP:CE33012 | ZK1067.3
UTGB	GTSSWA201593.01	outron	pqn-95	ZK1067.7	chrII	9227152	-	31	1.215	73	24	CE40244 | WBGene00004174 | WP:CE40244 | ZK1067.7 | pqn-95
UTGB	GTSSWA201594.01	exon	gst-13	T26C5.1	chrII	9231418	+	904	1.021	44	-1	CE03737 | T26C5.1 | WBGene00001761 | WP:CE03737 | gst-13
UTGB	GTSSWA201595.01	exon	T26C5.3	T26C5.3c	chrII	9236505	+	62	0.6648	80	-1	CE06514 | CE20103 | CE36955 | CE41162 | T26C5.3 | T26C5.3a | T26C5.3b | T26C5.3c | T26C5.3d | WBGene00012033 | WP:CE06514 | WP:CE20103 | WP:CE36955 | WP:CE41162
UTGB	GTSSWA201596.01	exon	T26C5.4	T26C5.4	chrII	9250381	-	197	0.5089	26	-1	CE03740 | T26C5.4 | WBGene00012034 | WP:CE03740
UTGB	GTSSWA201597.02	outron	C01G6.3	C01G6.3	chrII	9269197	+	29	0	619	619	C01G6.3 | C01G6.3.1 | C01G6.3.2 | C01G6.3.3 | CE37474 | WBGene00007225 | WP:CE37474
UTGB	GTSSWA201598.02	outron	C01G6.4	C01G6.4	chrII	9275164	-	20	8.206	2217	2199	C01G6.4 | C01G6.4.1 | C01G6.4.2 | CE00866 | WBGene00007226 | WP:CE00866
UTGB	GTSSWA201599.01	outron	tag-165	C01G6.6a.1	chrII	9285399	+	21	0.8793	501	498	C01G6.6 | C01G6.6a | C01G6.6a.1 | C01G6.6a.2 | C01G6.6b | C01G6.6b.1 | C01G6.6b.2 | CE00868 | CE32562 | WBGene00006510 | WP:CE00868 | WP:CE32562 | tag-165
UTGB	GTSSWA201600.01	outron	acs-7	C01G6.7	chrII	9291806	+	10	0	135	133	C01G6.7 | CE00869 | WBGene00007228 | WP:CE00869 | acs-7
UTGB	GTSSWA201601.01	exon	D2013.3	D2013.3	chrII	9319478	-	10	2.368	82	-1	CE17620 | D2013.3 | WBGene00008403 | WP:CE17620
UTGB	GTSSWA201602.03	outron	rab-39	D2013.1	chrII	9322981	-	27	1.089	148	143	CE30340 | D2013.1 | WBGene00004286 | WP:CE30340 | rab-39
UTGB	GTSSWA201603.01	outron	tag-175	D2013.10	chrII	9323103	+	26	2.06	780	775	CE17622 | D2013.10 | WBGene00006520 | WP:CE17622 | tag-175
UTGB	GTSSWA201604.02	outron	D2013.6	D2013.6	chrII	9329302	+	13	3.228	395	395	CE00931 | D2013.6 | WBGene00008404 | WP:CE00931
UTGB	GTSSWA201605.01	outron	ttll-12	D2013.9.1	chrII	9338851	+	11	1.719	69	69	CE01535 | D2013.9 | D2013.9.1 | D2013.9.2 | WBGene00008405 | WP:CE01535 | set-7 | ttll-12
UTGB	GTSSWA201606.01	exon	F42A8.1	F42A8.1	chrII	9346510	-	2003	1.413	21	-1	CE01578 | F42A8.1 | WBGene00009626 | WP:CE01578
UTGB	GTSSWA201607.01	outron	sdhb-1	F42A8.2.1	chrII	9352718	-	52	0.4993	63	63	CE01579 | F42A8.2 | F42A8.2.1 | F42A8.2.2 | WBGene00006433 | WP:CE01579 | sdhb-1 | tag-55
UTGB	GTSSWA201608.01	outron	F42A8.3	F42A8.3	chrII	9352842	+	11	0	81	81	CE35875 | F42A8.3 | F42A8.3.1 | F42A8.3.2 | WBGene00009627 | WP:CE35875
UTGB	GTSSWA201609.02	exon	C06C3.4	C06C3.4	chrII	9373506	+	12	0	14	-1	C06C3.4 | CE43402 | WBGene00007375 | WP:CE43402
UTGB	GTSSWA201610.01	exon	Y51B9A.5	Y51B9A.5	chrII	9404084	+	65	0.4885	51	-1	CE19215 | WBGene00013087 | WP:CE19215 | Y51B9A.5
UTGB	GTSSWA201611.01	exon	arrd-2	Y51B9A.4	chrII	9407750	+	10	0	27	-1	CE19214 | WBGene00013086 | WP:CE19214 | Y51B9A.4 | arrd-2
UTGB	GTSSWA201612.01	outron	M176.2	M176.2.1	chrII	9416442	-	12	0	88	87	CE18087 | M176.2 | M176.2.1 | M176.2.2 | WBGene00010941 | WP:CE18087
UTGB	GTSSWA201613.02	outron	M176.4	M176.4	chrII	9420148	+	15	0	254	254	CE33289 | M176.4 | M176.4.1 | M176.4.2 | WBGene00010943 | WP:CE33289
UTGB	GTSSWA201615.01	exon	M176.8	M176.8	chrII	9438209	-	21	16.27	86	-1	CE45020 | M176.8 | WBGene00010945 | WP:CE45020
UTGB	GTSSWA201616.01	exon	R09D1.6	R09D1.6	chrII	9454319	-	39	0	114	-1	CE03547 | R09D1.6 | WBGene00011162 | WP:CE03547
UTGB	GTSSWA201617.02	exon	T19H5.7	T19H5.7	chrII	9480024	-	130	0.8795	10	-1	CE41158 | T19H5.7 | WBGene00045414 | WP:CE41158
UTGB	GTSSWA201618.01	exon	AH6.3	AH6.3	chrII	9519002	+	31	1.823	67	-1	AH6.3 | CE01457 | WBGene00007081 | WP:CE01457
UTGB	GTSSWA201619.01	exon	sra-1	AH6.4	chrII	9524429	-	22	0	2836	-1	AH6.4 | CE01458 | WBGene00005027 | WP:CE01458 | sra-1
UTGB	GTSSWA201620.01	exon	sra-2	AH6.6	chrII	9525877	+	11	5.168	2824	-1	AH6.6 | CE01460 | WBGene00005028 | WP:CE01460 | sra-2
UTGB	GTSSWA201621.01	exon	F35H8.1	F35H8.1	chrII	9553199	-	33	0	25	-1	CE35867 | F35H8.1 | WBGene00009446 | WP:CE35867
UTGB	GTSSWA201622.01	outron	zfp-2	F35H8.3	chrII	9557572	+	42	1.098	94	38	CE00981 | F35H8.3 | WBGene00009448 | WP:CE00981 | zfp-2
UTGB	GTSSWA201623.01	exon	F35H8.4	F35H8.4	chrII	9559935	-	48	4.289	73	-1	CE35868 | F35H8.4 | WBGene00009449 | WP:CE35868
UTGB	GTSSWA201624.03	exon	tag-124	E02H1.3.2	chrII	9591243	+	120	3.502	84	-1	CE01538 | E02H1.3 | E02H1.3.1 | E02H1.3.2 | WBGene00006473 | WP:CE01538 | tag-124
UTGB	GTSSWA201625.01	exon	T15H9.5	T15H9.5	chrII	9611386	-	14	1.801	122	-1	CE01668 | T15H9.5 | WBGene00011790 | WP:CE01668
UTGB	GTSSWA201626.08	outron	T15H9.2	T15H9.2	chrII	9617603	-	299	10.23	557	555	CE01665 | T15H9.2 | WBGene00011788 | WP:CE01665
UTGB	GTSSWA201627.03	outron	T15H9.1.1	T15H9.1.1	chrII	9620554	-	46	0.9909	1461	1388	T15H9.1 | T15H9.1.1 | T15H9.1.2 | WBGene00011787
UTGB	GTSSWA201628.01	outron	dnj-20	T15H9.7	chrII	9624357	-	64	2.461	264	258	CE01664 | CE30689 | T15H9.7 | T15H9.7a | T15H9.7b | T15H9.7b.1 | T15H9.7b.2 | WBGene00001038 | WP:CE01664 | WP:CE30689 | dnj-20
UTGB	GTSSWA201629.01	outron	ZK1307.8	ZK1307.8.1	chrII	9624509	+	15	0	52	50	CE15547 | WBGene00014249 | WP:CE15547 | ZK1307.8 | ZK1307.8.1 | ZK1307.8.2 | ZK1307.8.3
UTGB	GTSSWA201630.02	exon	ZK1307.1	ZK1307.1a	chrII	9655513	-	108	0	59	-1	CE01690 | CE35921 | WBGene00014244 | WP:CE01690 | WP:CE35921 | ZK1307.1 | ZK1307.1a | ZK1307.1b | ZK1307.1b.1 | ZK1307.1b.2
UTGB	GTSSWA201631.01	outron	gstk-1	ZK1320.1	chrII	9656494	+	21	1.69	177	134	CE01698 | WBGene00014251 | WP:CE01698 | ZK1320.1 | gstk-1
UTGB	GTSSWA201632.01	outron	ZK1320.2	ZK1320.2.1	chrII	9658945	-	76	6.675	24	20	CE01700 | WBGene00014252 | WP:CE01700 | ZK1320.2 | ZK1320.2.1 | ZK1320.2.2
UTGB	GTSSWA201633.01	outron	ZK1320.3	ZK1320.3.1	chrII	9660373	-	177	1.58	35	31	CE01701 | WBGene00014253 | WP:CE01701 | ZK1320.3 | ZK1320.3.1 | ZK1320.3.2
UTGB	GTSSWA201634.02	exon	cyp-13A10	ZK1320.4	chrII	9662804	-	144	0.3857	41	-1	CE37736 | WBGene00014254 | WP:CE37736 | ZK1320.4 | cyp-13A10
UTGB	GTSSWA201635.01	outron	ZK1320.11	ZK1320.11	chrII	9667552	+	10	0	188	163	CE29941 | CE44398 | WBGene00014259 | WP:CE29941 | WP:CE44398 | ZK1320.11 | ZK1320.11a | ZK1320.11b
UTGB	GTSSWA201636.01	exon	Y53C12A.8	Y53C12A.8	chrII	9700355	-	17	0	34	-1	CE38452 | WBGene00044158 | WP:CE38452 | Y53C12A.8
UTGB	GTSSWA201637.02	exon	cutl-2	Y53C12B.6	chrII	9724516	-	13	4.141	67	-1	CE14904 | WBGene00013145 | WP:CE14904 | Y53C12B.6 | cutl-2
UTGB	GTSSWA201638.01	outron	Y53C12B.1	Y53C12B.1	chrII	9746115	-	35	11.01	125	120	CE14894 | WBGene00013143 | WP:CE14894 | Y53C12B.1
UTGB	GTSSWA201639.01	outron	Y53C12B.7	Y53C12B.7	chrII	9752307	-	11	0	80	67	CE35105 | WBGene00013146 | WP:CE35105 | Y53C12B.7
UTGB	GTSSWA201640.01	outron	ZK1321.4	ZK1321.4	chrII	9774753	-	319	1.661	953	943	CE32038 | CE44527 | WBGene00014262 | WP:CE32038 | WP:CE44527 | ZK1321.4 | ZK1321.4a | ZK1321.4a.1 | ZK1321.4a.2 | ZK1321.4b
UTGB	GTSSWA201641.01	exon	cyp-13A2	T10B9.7	chrII	9787318	-	13	3.412	42	-1	CE01659 | T10B9.7 | WBGene00011676 | WP:CE01659 | cyp-13A2
UTGB	GTSSWA201642.01	exon	cyp-13A5	T10B9.2	chrII	9800284	-	276	1.371	23	-1	CE01656 | T10B9.2 | WBGene00011672 | WP:CE01656 | cyp-13A5
UTGB	GTSSWA201643.01	exon	cyp-13A7	T10B9.10	chrII	9803512	+	66	0	30	-1	CE01655 | T10B9.10 | WBGene00000372 | WP:CE01655 | ccp-13A7 | cyp-13A7
UTGB	GTSSWA201644.01	exon	cyp-13A8	T10B9.4	chrII	9807511	-	17	0	56	-1	CE13541 | T10B9.4 | WBGene00011674 | WP:CE13541 | cyp-13A8
UTGB	GTSSWA201645.01	exon	C08H9.14	C08H9.14	chrII	9872900	-	13	0	26	-1	C08H9.14 | CE02999 | WBGene00007473 | WP:CE02999
UTGB	GTSSWA201646.01	exon	C08H9.1	C08H9.1	chrII	9875043	+	14	0	58	-1	C08H9.1 | CE02987 | WBGene00007462 | WP:CE02987
UTGB	GTSSWA201647.01	outron	C08H9.15	C08H9.15	chrII	9878707	+	14	2.305	2437	2408	C08H9.15 | CE34673 | WBGene00007474 | WP:CE34673
UTGB	GTSSWA201648.03	outron	C08H9.3	C08H9.3a	chrII	9886700	-	18	6.896	339	335	C08H9.3 | C08H9.3a | C08H9.3b | CE36914 | CE37608 | WBGene00007464 | WP:CE36914 | WP:CE37608
UTGB	GTSSWA201650.01	outron	F26C11.1	F26C11.1	chrII	9890538	+	56	0	2173	2162	CE01559 | F26C11.1 | WBGene00009146 | WP:CE01559
UTGB	GTSSWA201651.02	exon	pho-11	C05C10.4.1	chrII	9931771	+	186	0.6551	14	-1	C05C10.4 | C05C10.4.1 | C05C10.4.2 | C05C10.4.3 | CE17370 | WBGene00007331 | WP:CE17370 | pho-11
UTGB	GTSSWA201652.04	outron	C05C10.3	C05C10.3.1	chrII	9937626	-	44	16.31	815	810	C05C10.3 | C05C10.3.1 | C05C10.3.2 | CE01467 | WBGene00007330 | WP:CE01467
UTGB	GTSSWA201653.01	exon	C05C10.7	C05C10.7	chrII	9941487	-	41	0	2629	-1	C05C10.7 | CE31875 | WBGene00007334 | WP:CE31875
UTGB	GTSSWA201654.04	exon	C05C10.5	C05C10.5a	chrII	9939100	+	320	8.123	49	-1	C05C10.5 | C05C10.5a | C05C10.5b | C05C10.5c | C05C10.5c.1 | C05C10.5c.2 | C05C10.5c.3 | CE01469 | CE35822 | CE39217 | WBGene00007332 | WP:CE01469 | WP:CE35822 | WP:CE39217
UTGB	GTSSWA201655.01	outron	ufd-3	C05C10.6a	chrII	9940606	+	16	0.9322	77	74	C05C10.6 | C05C10.6a | C05C10.6b | CE02113 | CE27796 | WBGene00007333 | WP:CE02113 | WP:CE27796 | ufd-3
UTGB	GTSSWA201656.01	outron	R53.1	R53.1a.1	chrII	9943948	+	12	2.889	111	111	CE02303 | CE38215 | R53.1 | R53.1a | R53.1a.1 | R53.1a.2 | R53.1b | R53.1b.1 | R53.1b.2 | WBGene00011271 | WP:CE02303 | WP:CE38215
UTGB	GTSSWA201657.01	outron	egl-43	R53.3b	chrII	9960144	+	10	0	112	79	CE03572 | CE03573 | R53.3 | R53.3a | R53.3b | R53.3c | WBGene00001207 | WP:CE03572 | WP:CE03573 | egl-43
UTGB	GTSSWA201658.02	outron	R53.2	R53.2	chrII	9967054	-	49	3.395	50	32	CE03571 | R53.2 | WBGene00011272 | WP:CE03571
UTGB	GTSSWA201659.02	outron	R53.4	R53.4.1	chrII	9968388	-	26	2.812	418	416	CE03574 | R53.4 | R53.4.1 | R53.4.2 | R53.4.3 | WBGene00011273 | WP:CE03574
UTGB	GTSSWA201660.01	outron	aakg-5	R53.7a.1	chrII	9974947	-	117	1.152	320	320	CE03577 | CE32921 | R53.7 | R53.7a | R53.7a.1 | R53.7a.2 | R53.7b | WBGene00011276 | WP:CE03577 | WP:CE32921 | aakg-5
UTGB	GTSSWA201661.02	outron	nlt-1	ZK892.2	chrII	10001064	-	25	1.101	39	31	CE01725 | WBGene00003773 | WP:CE01725 | ZK892.2 | nlt-1
UTGB	GTSSWA201662.03	exon	ZK892.3	ZK892.3	chrII	10001768	+	51	1.629	74	-1	CE01726 | WBGene00014127 | WP:CE01726 | ZK892.3
UTGB	GTSSWA201663.05	exon	lec-2	F52H3.7a	chrII	10015903	-	5374	2.315	97	-1	CE29330 | CE32894 | F52H3.7 | F52H3.7a | F52H3.7b | F52H3.7b.1 | F52H3.7b.2 | F52H3.7b.3 | F52H3.7b.4 | WBGene00002265 | WP:CE29330 | WP:CE32894 | lec-2
UTGB	GTSSWA201664.01	outron	F52H3.2	F52H3.2.1	chrII	10033205	-	11	3.759	74	69	CE03398 | F52H3.2 | F52H3.2.1 | F52H3.2.2 | WBGene00009944 | WP:CE03398
UTGB	GTSSWA201665.03	outron	bath-38	F52H3.3	chrII	10045092	-	104	1.166	87	20	CE03399 | F52H3.3 | WBGene00009945 | WP:CE03399 | bath-38
UTGB	GTSSWA201666.01	outron	flp-4	C18D1.3	chrII	10054527	+	11	0	34	20	C18D1.3 | CE01503 | WBGene00001447 | WP:CE01503 | flp-4
UTGB	GTSSWA201667.01	outron	lact-2	ZK945.1	chrII	10094375	+	31	2.153	422	420	CE01731 | WBGene00014164 | WP:CE01731 | ZK945.1 | ZK945.1.1 | ZK945.1.2 | lact-2
UTGB	GTSSWA201668.01	outron	pas-7	ZK945.2.1	chrII	10099973	-	15	1.706	197	196	CE36420 | WBGene00003928 | WP:CE36420 | ZK945.2 | ZK945.2.1 | ZK945.2.2 | pas-7
UTGB	GTSSWA201669.01	outron	puf-12	ZK945.3	chrII	10100098	+	10	0	153	134	CE01734 | WBGene00014165 | WP:CE01734 | ZK945.3 | ZK945.3.1 | ZK945.3.2 | puf-12
UTGB	GTSSWA201670.01	exon	ZK945.6	ZK945.6a	chrII	10106871	-	33	0.5679	46	-1	CE01737 | CE35923 | WBGene00014168 | WP:CE01737 | WP:CE35923 | ZK945.6 | ZK945.6a | ZK945.6b
UTGB	GTSSWA201671.01	exon	ZK945.7	ZK945.7	chrII	10108394	-	131	0.677	67	-1	CE01738 | WBGene00014169 | WP:CE01738 | ZK945.7
UTGB	GTSSWA201672.02	exon	F27E5.7	F27E5.7	chrII	10122774	+	44	1.486	26	-1	CE41126 | F27E5.7 | WBGene00044035 | WP:CE41126
UTGB	GTSSWA201673.01	outron	gpd-4	F33H1.2.1	chrII	10171039	+	29	1.086	163	153	CE01568 | F33H1.2 | F33H1.2.1 | F33H1.2.2 | WBGene00001686 | WP:CE01568 | gpd-4
UTGB	GTSSWA201674.02	outron	F33H1.4	F33H1.4	chrII	10174553	+	52	1.692	43	17	CE42531 | F33H1.4 | WBGene00009365 | WP:CE42531
UTGB	GTSSWA201675.03	outron	R05H5.3	R05H5.3.1	chrII	10197319	+	31	0.9123	230	228	CE02290 | R05H5.3 | R05H5.3.1 | R05H5.3.2 | WBGene00011038 | WP:CE02290
UTGB	GTSSWA201676.01	outron	R05H5.5	R05H5.5	chrII	10201449	-	10	1.184	711	709	CE02292 | R05H5.5 | WBGene00011040 | WP:CE02292
UTGB	GTSSWA201677.01	exon	T01E8.8	T01E8.8	chrII	10231203	+	101	0.7275	27	-1	CE34977 | T01E8.8 | WBGene00011335 | WP:CE34977
UTGB	GTSSWA201678.01	exon	ubxn-5	T01E8.9	chrII	10234419	-	73	0	31	-1	CE34978 | T01E8.9 | WBGene00011336 | WP:CE34978 | ubxn-5
UTGB	GTSSWA201679.03	outron	T01E8.5	T01E8.5	chrII	10248013	-	250	0	481	453	CE18165 | T01E8.5 | T01E8.5.1 | T01E8.5.2 | WBGene00011333 | WP:CE18165
UTGB	GTSSWA201680.02	outron	F54B3.1	F54B3.1b	chrII	10250811	+	12	2.048	763	378	CE43180 | CE43308 | F54B3.1 | F54B3.1a | F54B3.1b | WBGene00010013 | WP:CE43180 | WP:CE43308
UTGB	GTSSWA201682.02	exon	mdt-22	ZK970.3	chrII	10301113	+	235	2.895	55	-1	CE02403 | WBGene00007022 | WP:CE02403 | ZK970.3 | mdt-22
UTGB	GTSSWA201681.01	outron	clpp-1	ZK970.2	chrII	10302787	-	16	0	83	72	CE02402 | CE43229 | WBGene00014172 | WP:CE02402 | WP:CE43229 | ZK970.2 | ZK970.2a | ZK970.2b | ZK970.2b.1 | ZK970.2b.2 | ZK970.2c | clpp-1
UTGB	GTSSWA201683.03	outron	vha-9	ZK970.4.1	chrII	10303748	-	43	0.6259	113	113	CE02404 | WBGene00006918 | WP:CE02404 | ZK970.4 | ZK970.4.1 | ZK970.4.2 | ZK970.4.3 | vha-9
UTGB	GTSSWA201684.01	exon	ZK970.7	ZK970.7	chrII	10312217	+	53	2.041	27	-1	CE02407 | WBGene00014173 | WP:CE02407 | ZK970.7
UTGB	GTSSWA201685.01	exon	M02G9.2	M02G9.2	chrII	10321385	+	12	0	28	-1	CE41147 | M02G9.2 | WBGene00010831 | WP:CE41147
UTGB	GTSSWA201686.01	outron	T09F3.2.1	T09F3.2.1	chrII	10388898	+	10	0	2384	2177	CE02342 | T09F3.2 | T09F3.2.1 | T09F3.2.2 | WBGene00011662 | WP:CE02342
UTGB	GTSSWA201687.06	outron	gpd-1	T09F3.3.1	chrII	10393882	+	39	1.523	176	168	CE02343 | T09F3.3 | T09F3.3.1 | T09F3.3.2 | WBGene00001683 | WP:CE02343 | gpd-1
UTGB	GTSSWA201688.01	exon	E04D5.5	E04D5.5	chrII	10411496	+	48	1.388	20	-1	CE34791 | E04D5.5 | WBGene00008484 | WP:CE34791
UTGB	GTSSWA201689.01	outron	E04D5.1	E04D5.1a.1	chrII	10416680	+	23	0	78	47	CE37820 | CE37821 | E04D5.1 | E04D5.1a | E04D5.1a.1 | E04D5.1a.2 | E04D5.1b | WBGene00008480 | WP:CE37820 | WP:CE37821
UTGB	GTSSWA201690.01	exon	E04D5.4	E04D5.4	chrII	10440184	+	173	1.459	23	-1	CE37893 | CE43354 | E04D5.4 | E04D5.4a | E04D5.4b | WBGene00008483 | WP:CE37893 | WP:CE43354
UTGB	GTSSWA201691.01	exon	ZK673.1	ZK673.1	chrII	10443248	+	740	1.147	13	-1	CE16742 | CE43391 | WBGene00014057 | WP:CE16742 | WP:CE43391 | ZK673.1 | ZK673.1a | ZK673.1b
UTGB	GTSSWA201692.03	exon	ZK673.3	ZK673.3	chrII	10450614	+	33	0.5679	77	-1	CE16743 | WBGene00014059 | WP:CE16743 | ZK673.3
UTGB	GTSSWA201693.01	exon	ZK673.6	ZK673.6	chrII	10464251	-	17	0	10	-1	CE01718 | WBGene00014062 | WP:CE01718 | ZK673.6
UTGB	GTSSWA201694.01	exon	ZK673.7.1	ZK673.7.1	chrII	10466781	+	45	1.555	77	-1	CE01719 | WBGene00006583 | WP:CE01719 | ZK673.7 | ZK673.7.1 | ZK673.7.2 | tnc-2
UTGB	GTSSWA201695.01	exon	ZK666.2	ZK666.2	chrII	10471843	-	68	2.043	31	-1	CE02387 | WBGene00014042 | WP:CE02387 | ZK666.2
UTGB	GTSSWA201696.02	outron	pqn-47	F59B10.1	chrII	10502618	-	24	0	209	155	CE36940 | F59B10.1 | WBGene00004134 | WP:CE36940 | pqn-47
UTGB	GTSSWA201697.01	exon	F59B10.3	F59B10.3	chrII	10510549	+	17	0	76	-1	CE35884 | F59B10.3 | WBGene00010319 | WP:CE35884
UTGB	GTSSWA201698.01	exon	F59B10.5	F59B10.5	chrII	10523112	-	13	2.412	53	-1	CE01594 | F59B10.5 | WBGene00010321 | WP:CE01594
UTGB	GTSSWA201699.01	exon	mab-10	R166.1	chrII	10530675	+	12	0	15	-1	CE43283 | R166.1 | WBGene00003107 | WP:CE43283 | mab-10
UTGB	GTSSWA201700.07	outron	pro-1	R166.4	chrII	10543272	-	144	4.415	1365	1354	CE03583 | R166.4 | R166.4.1 | R166.4.2 | WBGene00004185 | WP:CE03583 | pro-1
UTGB	GTSSWA201701.05	outron	cdc-48.1	C06A1.1.1	chrII	10563420	-	36	1.412	108	91	C06A1.1 | C06A1.1.1 | C06A1.1.2 | CE02114 | WBGene00007352 | WP:CE02114 | cdc-48.1 | phi-31
UTGB	GTSSWA201702.01	exon	C06A1.6	C06A1.6	chrII	10564618	-	17	0	20	-1	C06A1.6 | CE20484 | WBGene00007356 | WP:CE20484
UTGB	GTSSWA201703.01	exon	C06A1.7	C06A1.7	chrII	10564812	+	64	0	21	-1	C06A1.7 | CE38266 | WBGene00044235 | WP:CE38266
UTGB	GTSSWA201704.02	exon	C06A1.3	C06A1.3	chrII	10572176	+	27	0.5445	60	-1	C06A1.3 | CE02116 | WBGene00007354 | WP:CE02116
UTGB	GTSSWA201705.01	outron	rpb-6	C06A1.5	chrII	10578563	+	36	0	739	732	C06A1.5 | CE02117 | WBGene00007355 | WP:CE02117 | rpb-6
UTGB	GTSSWA201706.01	exon	C14A4.13	C14A4.13	chrII	10618369	+	26	0	24	-1	C14A4.13 | CE02142 | WBGene00007563 | WP:CE02142
UTGB	GTSSWA201707.01	exon	cutl-9	M28.1	chrII	10622189	+	16	0	38	-1	CE23881 | M28.1 | WBGene00010893 | WP:CE23881 | cutl-9
UTGB	GTSSWA201708.01	outron	M28.10	M28.10	chrII	10647273	+	15	1.349	165	165	CE32913 | M28.10 | M28.10.1 | M28.10.2 | WBGene00010901 | WP:CE32913
UTGB	GTSSWA201709.01	exon	lact-3	M28.6	chrII	10657618	-	65	0	27	-1	CE02284 | M28.6 | WBGene00010897 | WP:CE02284 | lact-3
UTGB	GTSSWA201710.01	outron	rsp-7	D2089.1a	chrII	10658899	+	47	0	233	231	CE03111 | CE30507 | D2089.1 | D2089.1a | D2089.1a.1 | D2089.1a.2 | D2089.1b | D2089.1b.1 | D2089.1b.2 | D2089.1b.3 | WBGene00004704 | WP:CE03111 | WP:CE30507 | rsp-7
UTGB	GTSSWA201711.01	exon	gbh-1	D2089.5	chrII	10693755	-	17	9.471	45	-1	CE00940 | D2089.5 | WBGene00001522 | WP:CE00940 | gbh-1
UTGB	GTSSWA201713.02	exon	col-79	C09G5.3	chrII	10703522	+	133	0.7042	18	-1	C09G5.3 | CE01483 | WBGene00000655 | WP:CE01483 | col-79
UTGB	GTSSWA201714.01	exon	col-39	C09G5.4	chrII	10704825	+	1459	1.06	19	-1	C09G5.4 | CE01484 | WBGene00000616 | WP:CE01484 | col-39
UTGB	GTSSWA201715.03	exon	col-80	C09G5.5	chrII	10707125	+	54290	0.6675	19	-1	C09G5.5 | CE01485 | WBGene00000656 | WP:CE01485 | col-80
UTGB	GTSSWA201712.01	outron	dph-2	C09G5.2	chrII	10714317	-	14	2.836	99	97	C09G5.2 | CE15608 | WBGene00007488 | WP:CE15608 | dph-2
UTGB	GTSSWA201716.01	outron	C09G5.7	C09G5.7	chrII	10712878	+	54	0	1957	1932	C09G5.7 | CE01487 | WBGene00007489 | WP:CE01487
UTGB	GTSSWA201718.01	outron	npp-19	R06F6.5b	chrII	10798538	-	18	0.6746	139	136	CE01621 | CE18121 | CeNup35 | R06F6.5 | R06F6.5a | R06F6.5a.1 | R06F6.5a.2 | R06F6.5b | R06F6.5b.1 | R06F6.5b.2 | WBGene00003805 | WP:CE01621 | WP:CE18121 | npp-19
UTGB	GTSSWA201719.01	outron	mix-1	M106.1	chrII	10824216	+	40	0	90	78	CE18083 | M106.1 | WBGene00003367 | WP:CE18083 | let-29 | mix-1 | smc-2
UTGB	GTSSWA201720.01	exon	VM106R.1	VM106R.1	chrII	10829776	-	10	0	456	-1	CE40627 | VM106R.1 | WBGene00014848 | WP:CE40627
UTGB	GTSSWA201721.02	outron	M106.3	M106.3b.1	chrII	10860845	-	56	0	38	29	CE40392 | CE40393 | M106.3 | M106.3a | M106.3b | M106.3b.1 | M106.3b.2 | M106.3b.3 | WBGene00010911 | WP:CE40392 | WP:CE40393
UTGB	GTSSWA201722.01	outron	F59E10.2.1	F59E10.2.1	chrII	10872600	-	13	2.091	71	66	CE01596 | F59E10.2 | F59E10.2.1 | F59E10.2.2 | WBGene00000880 | WP:CE01596 | cyn-4 | cyp-4 | mog-6
UTGB	GTSSWA201723.01	outron	F59E10.3	F59E10.3	chrII	10872722	+	18	2.548	112	79	CE11494 | F59E10.3 | WBGene00010333 | WP:CE11494
UTGB	GTSSWA201724.02	outron	egg-3	F44F4.2.1	chrII	10884406	-	16	0	43	42	CE00998 | F44F4.2 | F44F4.2.1 | F44F4.2.2 | WBGene00009701 | WP:CE00998 | egg-3
UTGB	GTSSWA201725.01	exon	F44F4.9	F44F4.9	chrII	10915755	-	10	0	63	-1	CE44344 | F44F4.9 | WBGene00009704 | WP:CE44344
UTGB	GTSSWA201726.01	exon	F44F4.10	F44F4.10	chrII	10917192	-	61	1.341	52	-1	CE00997 | F44F4.10 | WBGene00009705 | WP:CE00997
UTGB	GTSSWA201727.02	outron	R03D7.1	R03D7.1	chrII	10924884	+	160	2.118	1602	1599	CE01609 | R03D7.1 | WBGene00010988 | WP:CE01609
UTGB	GTSSWA201728.01	exon	R03D7.5	R03D7.5	chrII	10947474	+	26	0	58	-1	CE35899 | R03D7.5 | WBGene00010991 | WP:CE35899
UTGB	GTSSWA201729.01	exon	gst-5	R03D7.6	chrII	10950277	+	329	1.346	58	-1	CE01613 | R03D7.6 | WBGene00001753 | WP:CE01613 | gst-5
UTGB	GTSSWA201730.02	exon	col-81	F38A3.1	chrII	11013702	-	362	0.3963	18	-1	CE02213 | F38A3.1 | WBGene00000657 | WP:CE02213 | col-81
UTGB	GTSSWA201731.01	exon	ram-2	F38A3.2	chrII	11016762	-	353	1.601	14	-1	CE02214 | F38A3.2 | WBGene00004300 | WP:CE02214 | col-82 | ram-2 | ram-3
UTGB	GTSSWA201732.02	outron	let-858	F33A8.1.1	chrII	11022201	+	30	0	96	96	CE17753 | F33A8.1 | F33A8.1.1 | F33A8.1.2 | WBGene00002957 | WP:CE17753 | let-858
UTGB	GTSSWA201733.04	exon	F33A8.7	F33A8.7	chrII	11025491	-	20	2.744	10	-1	CE23701 | F33A8.7 | WBGene00009355 | WP:CE23701
UTGB	GTSSWA201734.01	outron	cey-1	F33A8.3.1	chrII	11041965	-	10	0	913	834	CE17755 | F33A8.3 | F33A8.3.1 | F33A8.3.2 | WBGene00000472 | WP:CE17755 | cey-1
UTGB	GTSSWA201735.01	outron	sdhd-1	F33A8.5.1	chrII	11049958	-	28	1.895	121	120	CE17757 | F33A8.5 | F33A8.5.1 | F33A8.5.2 | F33A8.5.3 | WBGene00009353 | WP:CE17757 | sdhd-1
UTGB	GTSSWA201736.01	outron	rpl-41	C09H10.2.1	chrII	11097389	-	83	14.09	265	260	2L388 | C09H10.2 | C09H10.2.1 | C09H10.2.2 | C09H10.2.3 | CE02131 | WBGene00004454 | WP:CE02131 | rpl-41
UTGB	GTSSWA201737.01	outron	nuo-1	C09H10.3	chrII	11097556	+	32	0	213	211	C09H10.3 | CE02132 | WBGene00003831 | WP:CE02132 | nuo-1
UTGB	GTSSWA201738.02	outron	nasp-1	C09H10.6	chrII	11106162	+	19	1.454	398	380	C09H10.6 | CE03007 | WBGene00007500 | WP:CE03007 | nasp-1
UTGB	GTSSWA201739.04	outron	rps-9	F40F8.10.1	chrII	11126455	-	261	2.132	177	168	CE05849 | F40F8.10 | F40F8.10.1 | F40F8.10.2 | WBGene00004478 | WP:CE05849 | rps-9
UTGB	GTSSWA201740.02	outron	lsm-1	F40F8.9	chrII	11126633	+	15	0	244	241	CE05848 | F40F8.9 | WBGene00003076 | WP:CE05848 | lsm-1
UTGB	GTSSWA201741.01	exon	F40F8.1	F40F8.1.1	chrII	11128387	+	15	0	25	-1	CE05842 | F40F8.1 | F40F8.1.1 | F40F8.1.2 | F40F8.1.3 | F40F8.1.4 | F40F8.1.5 | WBGene00009575 | WP:CE05842
UTGB	GTSSWA201742.01	outron	F40F8.11	F40F8.11.1	chrII	11132597	-	19	6.228	88	75	CE40359 | F40F8.11 | F40F8.11.1 | F40F8.11.2 | WBGene00044916 | WP:CE40359
UTGB	GTSSWA201743.03	exon	F40F8.4	F40F8.4	chrII	11140159	-	50	0.466	7	-1	CE05844 | F40F8.4 | WBGene00009577 | WP:CE05844
UTGB	GTSSWA201744.01	outron	pqm-1	F40F8.7.1	chrII	11153932	-	38	0	1443	1414	CE05846 | CePqM132 | F40F8.7 | F40F8.7.1 | F40F8.7.2 | WBGene00004096 | WP:CE05846 | pqm-1 | pqm-132
UTGB	GTSSWA201745.02	exon	ptr-13	K07C10.1	chrII	11162289	-	24	0.5646	33	-1	CE39744 | K07C10.1 | WBGene00004227 | WP:CE39744 | ptr-13
UTGB	GTSSWA201746.01	exon	sfxn-1.2	F37H8.4	chrII	11185951	+	16	0.9322	25	-1	CE35871 | F37H8.4 | WBGene00009513 | WP:CE35871 | sfxn-1.2
UTGB	GTSSWA201747.01	exon	F37H8.5	F37H8.5	chrII	11188173	+	27	0	1	-1	CE15997 | F37H8.5 | WBGene00009514 | WP:CE15997
UTGB	GTSSWA201748.01	outron	T06D8.3	T06D8.3	chrII	11220206	+	12	5.579	2062	2016	CE02324 | T06D8.3 | WBGene00011524 | WP:CE02324
UTGB	GTSSWA201749.01	outron	T06D8.5	T06D8.5.1	chrII	11235235	-	12	5.636	370	365	CE02326 | T06D8.5 | T06D8.5.1 | T06D8.5.2 | T06D8.5.3 | WBGene00011526 | WP:CE02326
UTGB	GTSSWA201750.01	outron	cchl-1	T06D8.6.1	chrII	11236345	-	11	2.506	53	40	CE02327 | T06D8.6 | T06D8.6.1 | T06D8.6.2 | WBGene00011527 | WP:CE02327 | cchl-1
UTGB	GTSSWA201751.04	outron	rpn-9	T06D8.8.1	chrII	11238896	-	85	0.8714	60	59	CE02329 | T06D8.8 | T06D8.8.1 | T06D8.8.2 | WBGene00004465 | WP:CE02329 | rpn-9
UTGB	GTSSWA201752.02	outron	T06D8.9	T06D8.9.1	chrII	11239490	+	30	0	145	145	CE38219 | T06D8.9 | T06D8.9.1 | T06D8.9.2 | WBGene00011529 | WP:CE38219
UTGB	GTSSWA201753.01	exon	T06D8.10	T06D8.10	chrII	11247441	-	11	0	17	-1	CE13311 | T06D8.10 | WBGene00011530 | WP:CE13311
UTGB	GTSSWA201754.03	outron	T05B9.1	T05B9.1	chrII	11261217	-	147	4.408	107	107	CE02310 | T05B9.1 | WBGene00011464 | WP:CE02310
UTGB	GTSSWA201755.03	exon	C47G2.4	C47G2.4	chrII	11293455	-	95	0.5096	61	-1	C47G2.4 | CE02167 | WBGene00008165 | WP:CE02167
UTGB	GTSSWA201756.06	outron	saps-1	C47G2.5a	chrII	11297441	+	75	2.616	176	176	C47G2.5 | C47G2.5a | C47G2.5b | C47G2.5c | CE38162 | CE41110 | CE42481 | WBGene00008166 | WP:CE38162 | WP:CE41110 | WP:CE42481 | saps-1
UTGB	GTSSWA201757.01	outron	raga-1	T24F1.1.1	chrII	11300601	+	10	0	680	675	CE02361 | T24F1.1 | T24F1.1.1 | T24F1.1.2 | WBGene00006414 | WP:CE02361 | raga-1 | tag-29
UTGB	GTSSWA201758.01	exon	T24F1.7	T24F1.7	chrII	11312455	+	15	0	29	-1	CE35029 | T24F1.7 | WBGene00011999 | WP:CE35029
UTGB	GTSSWA201759.01	exon	lgc-20	B0491.4	chrII	11343784	-	16	1.031	336	-1	B0491.4 | CE02106 | WBGene00007191 | WP:CE02106 | lgc-20
UTGB	GTSSWA201760.01	outron	B0491.5	B0491.5.1	chrII	11345665	-	49	0	132	127	B0491.5 | B0491.5.1 | B0491.5.2 | B0491.5.3 | B0491.5.4 | CE02107 | WBGene00007192 | WP:CE02107
UTGB	GTSSWA201761.01	exon	B0491.6	B0491.6b	chrII	11347787	-	23	2.064	74	-1	B0491.6 | B0491.6a | B0491.6b | CE02108 | CE41099 | WBGene00007193 | WP:CE02108 | WP:CE41099
UTGB	GTSSWA201762.03	outron	B0491.1	B0491.1	chrII	11348376	+	128	0.9325	33	21	B0491.1 | CE02103 | WBGene00007189 | WP:CE02103
UTGB	GTSSWA201763.02	outron	C33B4.4	C33B4.4	chrII	11376845	-	45	0.9367	693	658	C33B4.4 | CE34727 | WBGene00007892 | WP:CE34727
UTGB	GTSSWA201764.06	outron	C05D12.3	C05D12.3c.1	chrII	11425171	+	42	0.5069	26	14	C05D12.3 | C05D12.3a | C05D12.3b | C05D12.3c | C05D12.3c.1 | C05D12.3c.2 | CE36974 | CE39469 | WBGene00014666 | WP:CE36974 | WP:CE39469
UTGB	GTSSWA201765.01	outron	vha-6	VW02B12L.1.1	chrII	11438479	-	20	0	141	110	CE18980 | VW02B12L.1 | VW02B12L.1.1 | VW02B12L.1.2 | WBGene00006915 | WP:CE18980 | vha-6
UTGB	GTSSWA201766.01	outron	ebp-2	VW02B12L.3.1	chrII	11440333	+	11	0	2321	2308	CE18982 | VW02B12L.3 | VW02B12L.3.1 | VW02B12L.3.2 | WBGene00012156 | WP:CE18982 | ebp-2
UTGB	GTSSWA201767.01	outron	rsp-2	W02B12.2	chrII	11453049	-	11	0	187	177	CE03762 | CeSRp40 | W02B12.2 | WBGene00004699 | WP:CE03762 | rsp-2 | srp-4
UTGB	GTSSWA201768.01	exon	aars-1	W02B12.6a	chrII	11463990	-	34	12.65	52	-1	CE28096 | W02B12.6 | W02B12.6a | W02B12.6b | WBGene00000196 | WP:CE28096 | aars-1 | alas | ars-1
UTGB	GTSSWA201769.03	outron	rga-1	W02B12.8a	chrII	11464623	+	49	0	190	187	CE03768 | CE38231 | W02B12.8 | W02B12.8a | W02B12.8b | W02B12.8b.1 | W02B12.8b.2 | W02B12.8b.3 | W02B12.8b.4 | W02B12.8b.5 | WBGene00012203 | WP:CE03768 | WP:CE38231 | rga-1
UTGB	GTSSWA201770.01	outron	W02B12.15	W02B12.15a.1	chrII	11469540	-	32	0.5465	519	514	CE37932 | CE41460 | W02B12.15 | W02B12.15a | W02B12.15a.1 | W02B12.15a.2 | W02B12.15a.3 | W02B12.15b | WBGene00044026 | WP:CE37932 | WP:CE41460
UTGB	GTSSWA201771.01	outron	W02B12.11	W02B12.11.1	chrII	11473796	+	75	2.167	216	177	CE25132 | W02B12.11 | W02B12.11.1 | W02B12.11.2 | WBGene00012206 | WP:CE25132
UTGB	GTSSWA201772.01	exon	W02B12.12	W02B12.12b	chrII	11479091	-	16	0	13	-1	CE21239 | CE37051 | W02B12.12 | W02B12.12a | W02B12.12b | WBGene00012207 | WP:CE21239 | WP:CE37051
UTGB	GTSSWA201774.01	outron	ttr-18	B0334.1.1	chrII	11486676	-	143	0.7243	12	11	B0334.1 | B0334.1.1 | B0334.1.2 | B0334.1.3 | CE02932 | WBGene00007142 | WP:CE02932 | ttr-18
UTGB	GTSSWA201775.02	outron	B0334.3	B0334.3a.1	chrII	11492907	-	41	0	27	27	B0334.3 | B0334.3a | B0334.3a.1 | B0334.3a.2 | B0334.3b | CE02935 | CE19658 | WBGene00007143 | WP:CE02935 | WP:CE19658
UTGB	GTSSWA201776.02	outron	ooc-3	B0334.11a	chrII	11495449	-	63	1.683	218	218	B0334.11 | B0334.11a | B0334.11b | CE19661 | CE32788 | WBGene00003868 | WP:CE19661 | WP:CE32788 | mel-19 | ooc-3
UTGB	GTSSWA201777.01	outron	B0334.4	B0334.4	chrII	11495529	+	19	2.404	90	79	B0334.4 | CE02936 | WBGene00007144 | WP:CE02936
UTGB	GTSSWA201778.01	exon	Y62F5A.9	Y62F5A.9	chrII	11538728	-	27	0	12	-1	CE22710 | WBGene00013387 | WP:CE22710 | Y62F5A.9
UTGB	GTSSWA201779.01	outron	F54D5.12	F54D5.12.1	chrII	11540640	-	47	4.804	93	93	CE26814 | F54D5.12 | F54D5.12.1 | F54D5.12.2 | WBGene00010055 | WP:CE26814
UTGB	GTSSWA201780.02	outron	F54D5.11	F54D5.11.1	chrII	11542437	-	26	0	30	25	CE26813 | F54D5.11 | F54D5.11.1 | F54D5.11.2 | WBGene00010054 | WP:CE26813
UTGB	GTSSWA201781.01	exon	F54D5.9	F54D5.9	chrII	11544747	-	269	15.56	59	-1	CE03413 | F54D5.9 | WBGene00010053 | WP:CE03413
UTGB	GTSSWA201782.04	outron	F54D5.7	F54D5.7.1	chrII	11547414	+	1148	1.203	27	19	CE03411 | F54D5.7 | F54D5.7.1 | F54D5.7.2 | F54D5.7.3 | WBGene00010052 | WP:CE03411
UTGB	GTSSWA201783.01	exon	F54D5.15	F54D5.15c	chrII	11564119	-	10	0	51	-1	CE32896 | CE37239 | CE37240 | F54D5.15 | F54D5.15a | F54D5.15b | F54D5.15b.1 | F54D5.15b.2 | F54D5.15b.3 | F54D5.15c | WBGene00010057 | WP:CE32896 | WP:CE37239 | WP:CE37240
UTGB	GTSSWA201784.01	outron	F54D5.4	F54D5.4.1	chrII	11569394	+	134	1.102	339	338	CE03409 | F54D5.4 | F54D5.4.1 | F54D5.4.2 | WBGene00010050 | WP:CE03409
UTGB	GTSSWA201785.02	outron	F54D5.3	F54D5.3.1	chrII	11571692	+	136	0.4538	28	27	CE28033 | F54D5.3 | F54D5.3.1 | F54D5.3.2 | WBGene00010049 | WP:CE28033
UTGB	GTSSWA201786.04	exon	F54D5.2	F54D5.2	chrII	11573104	+	107	0.4593	82	-1	CE36491 | F54D5.2 | WBGene00010048 | WP:CE36491
UTGB	GTSSWA201787.01	exon	pcs-1	F54D5.1a	chrII	11577390	-	12	0.7557	217	-1	CE40964 | CE40965 | F54D5.1 | F54D5.1a | F54D5.1b | TFIIE-beta | WBGene00003960 | WP:CE40964 | WP:CE40965 | pcs-1
UTGB	GTSSWA201788.01	outron	smc-6	F54D5.14	chrII	11578491	+	15	0	200	139	CE18730 | F54D5.14 | WBGene00010056 | WP:CE18730 | smc-6
UTGB	GTSSWA201789.01	outron	F07A11.2	F07A11.2b.1	chrII	11596288	-	55	0.4656	991	965	CE03144 | CE27915 | F07A11.2 | F07A11.2a | F07A11.2b | F07A11.2b.1 | F07A11.2b.2 | F07A11.2b.3 | WBGene00008546 | WP:CE03144 | WP:CE27915
UTGB	GTSSWA201790.06	outron	rpn-12	ZK20.5.1	chrII	11653028	+	106	3.184	15	12	CE06608 | WBGene00004468 | WP:CE06608 | ZK20.5 | ZK20.5.1 | ZK20.5.2 | rpn-12
UTGB	GTSSWA201791.01	outron	tars-1	C47D12.6b.2	chrII	11695196	-	19	2.11	1205	1202	C47D12.6 | C47D12.6a | C47D12.6b | C47D12.6b.1 | C47D12.6b.2 | C47D12.6b.3 | C47D12.6b.4 | CE05434 | CE33765 | WBGene00006617 | WP:CE05434 | WP:CE33765 | tars-1 | trs-1
UTGB	GTSSWA201793.01	exon	F13D12.3	F13D12.3	chrII	11720443	+	53	2.087	65	-1	CE03197 | F13D12.3 | WBGene00008739 | WP:CE03197
UTGB	GTSSWA201794.06	outron	alh-8	F13D12.4a.2	chrII	11728952	+	2044	2.217	43	19	CE02183 | CE36262 | F13D12.4 | F13D12.4a | F13D12.4a.1 | F13D12.4a.2 | F13D12.4a.3 | F13D12.4b | WBGene00000114 | WP:CE02183 | WP:CE36262 | alh-8
UTGB	GTSSWA201795.04	exon	F13D12.6	F13D12.6.1	chrII	11739418	+	451	1.446	19	-1	CE02185 | F13D12.6 | F13D12.6.1 | F13D12.6.2 | WBGene00008741 | WP:CE02185
UTGB	GTSSWA201796.01	outron	F13D12.7.1	F13D12.7.1	chrII	11749355	-	11	0	1791	1627	CE02186 | CE44352 | F13D12.7 | F13D12.7.1 | F13D12.7.2 | F13D12.7.3 | F13D12.7a | F13D12.7a.1 | F13D12.7a.2 | F13D12.7a.3 | F13D12.7b | WBGene00001679 | WP:CE02186 | WP:CE44352 | gpb-1
UTGB	GTSSWA201797.01	exon	F44E5.5	F44E5.5	chrII	11756700	+	374	1.391	2921	-1	CE18679 | F44E5.5 | WBGene00009692 | WP:CE18679
UTGB	GTSSWA201798.01	outron	patr-1	F43G6.9.1	chrII	11778068	-	12	0.9631	231	208	CE18675 | F43G6.9 | F43G6.9.1 | F43G6.9.2 | WBGene00009661 | WP:CE18675 | patr-1
UTGB	GTSSWA201799.01	exon	dna-2	F43G6.1a	chrII	11776647	+	47	0	1420	-1	CE02219 | CE23725 | F43G6.1 | F43G6.1a | F43G6.1b | WBGene00001016 | WP:CE02219 | WP:CE23725 | dna-2
UTGB	GTSSWA201800.01	exon	F43G6.6	F43G6.6	chrII	11806455	+	10	0.8493	30	-1	CE20788 | F43G6.6 | WBGene00005013 | WP:CE20788
UTGB	GTSSWA201801.01	outron	F43G6.8	F43G6.8	chrII	11814024	-	155	2.092	79	24	CE20789 | F43G6.8 | WBGene00009660 | WP:CE20789
UTGB	GTSSWA201802.03	outron	clh-1	T27D12.2b	chrII	11854684	-	45	3.226	25	24	CE27450 | CE28090 | T27D12.2 | T27D12.2a | T27D12.2b | WBGene00000528 | WP:CE27450 | WP:CE28090 | clh-1
UTGB	GTSSWA201803.01	outron	K12D12.5	K12D12.5	chrII	11860899	+	34	0	55	46	CE06185 | K12D12.5 | WBGene00010787 | WP:CE06185
UTGB	GTSSWA201804.02	outron	top-2	K12D12.1	chrII	11874913	+	18	3.719	160	150	CE06184 | K12D12.1 | WBGene00010785 | WP:CE06184 | top-2
UTGB	GTSSWA201805.03	exon	ZK930.5	ZK930.5	chrII	11882513	+	37	0	17	-1	CE06675 | WBGene00014155 | WP:CE06675 | ZK930.5
UTGB	GTSSWA201806.01	outron	ZK930.4	ZK930.4	chrII	11906445	+	63	1.845	1253	1172	CE06674 | WBGene00014154 | WP:CE06674 | ZK930.4
UTGB	GTSSWA201808.01	exon	ZK930.7	ZK930.7	chrII	11914482	+	17	0	189	-1	CE16752 | WBGene00014157 | WP:CE16752 | ZK930.7
UTGB	GTSSWA201807.02	outron	ZK930.1	ZK930.1	chrII	11917242	-	66	0	1480	1473	CE06671 | WBGene00014151 | WP:CE06671 | ZK930.1
UTGB	GTSSWA201809.03	outron	hmg-12	Y17G7A.1.1	chrII	11916360	+	124	0.9254	70	69	CE21378 | WBGene00001977 | WP:CE21378 | Y17G7A.1 | Y17G7A.1.1 | Y17G7A.1.2 | hmg-12 | hmg-I-beta
UTGB	GTSSWA201810.01	exon	W03C9.8	W03C9.8	chrII	11948646	+	152	0	33	-1	CE32949 | W03C9.8 | WBGene00012223 | WP:CE32949
UTGB	GTSSWA201811.01	outron	W03C9.2	W03C9.2	chrII	11962257	+	13	0	32	32	CE16532 | W03C9.2 | WBGene00012220 | WP:CE16532
UTGB	GTSSWA201812.02	outron	W03C9.5	W03C9.5	chrII	11967565	-	13	0	134	118	CE03779 | W03C9.5 | WBGene00012221 | WP:CE03779
UTGB	GTSSWA201813.01	outron	mex-1	W03C9.7.1	chrII	11968452	+	12	0.7557	112	100	CE28097 | W03C9.7 | W03C9.7.1 | W03C9.7.2 | W03C9.7.3 | W03C9.7.4 | WBGene00003228 | WP:CE28097 | mel-21 | mex-1
UTGB	GTSSWA201814.01	outron	acbp-6	Y17G7B.1	chrII	11975911	-	43	19.6	2329	1896	CE19034 | WBGene00012457 | WP:CE19034 | Y17G7B.1 | acbp-6
UTGB	GTSSWA201815.04	outron	Y17G7B.21	Y17G7B.21	chrII	11978124	-	25	1.499	564	549	CE32516 | WBGene00012472 | WP:CE32516 | Y17G7B.21
UTGB	GTSSWA201816.01	outron	Y17G7B.12	Y17G7B.12	chrII	12023654	+	12	3.331	127	122	CE19046 | WBGene00012465 | WP:CE19046 | Y17G7B.12 | Y17G7B.12.1 | Y17G7B.12.2
UTGB	GTSSWA201817.01	outron	set-24	Y43F11A.5	chrII	12132961	-	15	0	2100	2077	CE41046 | WBGene00012845 | WP:CE41046 | Y43F11A.5 | set-24
UTGB	GTSSWA201818.01	outron	Y57A10A.14	Y57A10A.14	chrII	12185893	+	14	0	58	43	CE41068 | WBGene00013257 | WP:CE41068 | Y57A10A.14
UTGB	GTSSWA201819.02	outron	rsr-2	Y57A10A.19	chrII	12225112	+	26	0.5507	161	159	CE25503 | WBGene00013260 | WP:CE25503 | Y57A10A.19 | rsr-2
UTGB	GTSSWA201820.01	exon	tag-276	Y57A10A.9	chrII	12249036	-	13	0	43	-1	CE22628 | WBGene00013254 | WP:CE22628 | Y57A10A.9 | tag-276
UTGB	GTSSWA201821.01	exon	C50E10.1	C50E10.1	chrII	12302344	-	194	0	47	-1	C50E10.1 | CE28141 | WBGene00016825 | WP:CE28141
UTGB	GTSSWA201822.02	exon	btb-14	Y57A10B.3	chrII	12383384	+	516	0.3685	9	-1	CE20324 | WBGene00013275 | WP:CE20324 | Y57A10B.3 | btb-14
UTGB	GTSSWA201823.01	exon	Y57A10B.6	Y57A10B.6	chrII	12390032	+	10	1.979	39	-1	CE20327 | WBGene00013278 | WP:CE20327 | Y57A10B.6
UTGB	GTSSWA201824.01	exon	Y57A10B.7	Y57A10B.7	chrII	12393715	-	10	0	56	-1	CE35689 | WBGene00013279 | WP:CE35689 | Y57A10B.7
UTGB	GTSSWA201825.01	outron	tag-281	F15A4.11	chrII	12459606	+	15	2.024	93	79	CE23655 | F15A4.11 | WBGene00044323 | WP:CE23655 | tag-281
UTGB	GTSSWA201826.01	exon	F15A4.2	F15A4.2	chrII	12462433	+	29	0	37	-1	CE15839 | F15A4.2 | WBGene00008838 | WP:CE15839
UTGB	GTSSWA201827.01	exon	F15A4.6	F15A4.6	chrII	12471722	+	1301	0.6233	17	-1	CE15843 | F15A4.6 | WBGene00008841 | WP:CE15843
UTGB	GTSSWA201828.01	outron	T21B4.17	T21B4.17	chrII	12519000	+	29	1.869	1127	1126	CE38419 | T21B4.17 | WBGene00044032 | WP:CE38419
UTGB	GTSSWA201829.01	exon	clec-4	Y38E10A.5	chrII	12580981	-	47	0.9448	13	-1	CE28701 | WBGene00012583 | WP:CE28701 | Y38E10A.5 | clec-4
UTGB	GTSSWA201830.01	exon	lips-15	Y38E10A.7	chrII	12605881	+	18	0	8	-1	CE21587 | WBGene00012585 | WP:CE21587 | Y38E10A.7 | lips-15
UTGB	GTSSWA201831.01	outron	lips-16	Y38E10A.10	chrII	12612267	-	14	2.88	250	236	CE21590 | WBGene00012588 | WP:CE21590 | Y38E10A.10 | lips-16
UTGB	GTSSWA201832.01	exon	nspe-4	Y38E10A.11	chrII	12612465	+	18	0	1113	-1	CE21591 | WBGene00012589 | WP:CE21591 | Y38E10A.11 | nspe-4
UTGB	GTSSWA201833.01	exon	nspe-6	Y38E10A.25	chrII	12616107	-	70	0.5069	28	-1	CE35074 | WBGene00012603 | WP:CE35074 | Y38E10A.25 | nspe-6
UTGB	GTSSWA201834.02	exon	nspe-2	Y38E10A.26	chrII	12619320	-	1716	0.3946	19	-1	CE35075 | WBGene00012604 | WP:CE35075 | Y38E10A.26 | nspe-2
UTGB	GTSSWA201835.01	exon	nspe-1	Y38E10A.13	chrII	12620797	-	9428	1.256	20	-1	CE21593 | WBGene00012591 | WP:CE21593 | Y38E10A.13 | nspe-1
UTGB	GTSSWA201836.01	exon	Y38E10A.14	Y38E10A.14	chrII	12624457	-	21	0	872	-1	CE21594 | WBGene00012592 | WP:CE21594 | Y38E10A.14
UTGB	GTSSWA201837.01	exon	nspe-7	Y38E10A.15	chrII	12627102	+	34	1.854	17	-1	CE21595 | WBGene00012593 | WP:CE21595 | Y38E10A.15 | nspe-7
UTGB	GTSSWA201838.01	exon	nspe-5	Y38E10A.16	chrII	12628890	+	30	1.869	27	-1	CE21596 | WBGene00012594 | WP:CE21596 | Y38E10A.16 | nspe-5
UTGB	GTSSWA201839.01	exon	Y38E10A.28	Y38E10A.28	chrII	12629624	+	19	0.612	22	-1	CE37940 | WBGene00044034 | WP:CE37940 | Y38E10A.28
UTGB	GTSSWA201840.01	exon	Y38E10A.17	Y38E10A.17	chrII	12634671	-	134	1.123	90	-1	CE21597 | WBGene00012595 | WP:CE21597 | Y38E10A.17
UTGB	GTSSWA201841.01	outron	Y38E10A.23	Y38E10A.23	chrII	12679570	-	26	0.5507	1862	1857	CE21604 | WBGene00012601 | WP:CE21604 | Y38E10A.23
UTGB	GTSSWA201842.01	outron	pisy-1	Y46G5A.5	chrII	12739334	-	519	1.236	1099	1093	CE21973 | WBGene00012897 | WP:CE21973 | Y46G5A.5 | pisy-1
UTGB	GTSSWA201843.01	exon	Y46G5A.8	Y46G5A.8	chrII	12756234	+	63	1.689	27	-1	CE24305 | WBGene00012900 | WP:CE24305 | Y46G5A.8
UTGB	GTSSWA201844.01	exon	Y46G5A.14	Y46G5A.14	chrII	12773979	+	10	0.9893	978	-1	CE21989 | WBGene00012905 | WP:CE21989 | Y46G5A.14
UTGB	GTSSWA201845.01	outron	Y46G5A.15	Y46G5A.15	chrII	12785446	-	11	0	131	127	CE35666 | WBGene00012906 | WP:CE35666 | Y46G5A.15
UTGB	GTSSWA201846.02	outron	Y46G5A.35	Y46G5A.35	chrII	12788363	-	36	5.002	314	301	CE21993 | WBGene00012920 | WP:CE21993 | Y46G5A.35
UTGB	GTSSWA201847.02	outron	Y46G5A.19.2	Y46G5A.19.2	chrII	12806750	+	13	0.7234	67	60	CE21997 | CE31114 | WBGene00012909 | WP:CE21997 | WP:CE31114 | Y46G5A.19 | Y46G5A.19.1 | Y46G5A.19.2 | Y46G5A.19a | Y46G5A.19a.1 | Y46G5A.19a.2 | Y46G5A.19b
UTGB	GTSSWA201848.02	outron	Y46G5A.20	Y46G5A.20	chrII	12810945	+	118	1.422	66	60	CE24293 | WBGene00012910 | WP:CE24293 | Y46G5A.20
UTGB	GTSSWA201849.01	exon	Y46G5A.22	Y46G5A.22b	chrII	12818497	-	12	0	40	-1	CE21999 | CE24295 | WBGene00012912 | WP:CE21999 | WP:CE24295 | Y46G5A.22 | Y46G5A.22a | Y46G5A.22b
UTGB	GTSSWA201850.01	exon	bcmo-1	Y46G5A.24	chrII	12830568	+	10	0	48	-1	CE21970 | WBGene00012914 | WP:CE21970 | Y46G5A.24 | bcmo-1
UTGB	GTSSWA201851.01	exon	snf-5	Y46G5A.30	chrII	12865730	-	225	0.3871	145	-1	CE29609 | WBGene00004904 | WP:CE29609 | Y46G5A.30 | snf-5
UTGB	GTSSWA201852.04	outron	gsy-1	Y46G5A.31	chrII	12880441	-	66	0.8134	2440	2417	CE24302 | WBGene00001793 | WP:CE24302 | Y46G5A.31 | gsy-1
UTGB	GTSSWA201853.06	outron	clec-62	F35C5.5a	chrII	12895026	-	76	10.32	18	18	CE15945 | CE15946 | F35C5.5 | F35C5.5a | F35C5.5a.1 | F35C5.5a.2 | F35C5.5b | WBGene00009393 | WP:CE15945 | WP:CE15946 | clec-62
UTGB	GTSSWA201854.02	outron	clec-63	F35C5.6.1	chrII	12895525	+	296	6.993	24	22	CE15947 | F35C5.6 | F35C5.6.1 | F35C5.6.2 | WBGene00009394 | WP:CE15947 | clec-63
UTGB	GTSSWA201855.03	outron	clec-65	F35C5.8.1	chrII	12901200	+	19	1.873	41	34	CE15949 | F35C5.8 | F35C5.8.1 | F35C5.8.2 | WBGene00009396 | WP:CE15949 | clec-65
UTGB	GTSSWA201856.01	exon	F35C5.12	F35C5.12	chrII	12914489	-	10	0	73	-1	CE18661 | F35C5.12 | WBGene00009400 | WP:CE18661
UTGB	GTSSWA201857.02	outron	F58G1.2.1	F58G1.2.1	chrII	12919151	-	37	0	592	464	CE35561 | CE43339 | F58G1.2 | F58G1.2.1 | F58G1.2.2 | F58G1.2a | F58G1.2a.1 | F58G1.2a.2 | F58G1.2a.3 | F58G1.2a.4 | F58G1.2b | WBGene00010264 | WP:CE35561 | WP:CE43339
UTGB	GTSSWA201858.01	outron	F58G1.1	F58G1.1	chrII	12919340	+	57	0.5205	146	122	CE17921 | F58G1.1 | WBGene00010263 | WP:CE17921
UTGB	GTSSWA201859.01	exon	F58G1.9	F58G1.9	chrII	12922916	+	10	0	1877	-1	CE17929 | F58G1.9 | WBGene00010271 | WP:CE17929
UTGB	GTSSWA201860.02	exon	F58G1.3	F58G1.3	chrII	12928229	-	93	1.663	59	-1	CE35562 | F58G1.3 | WBGene00010265 | WP:CE35562
UTGB	GTSSWA201861.01	outron	dct-18	F58G1.4	chrII	12931665	+	13	0	118	117	CE17924 | F58G1.4 | WBGene00010266 | WP:CE17924 | dct-18
UTGB	GTSSWA201862.01	exon	Y38F1A.1	Y38F1A.1	chrII	12954695	-	81	0.477	72	-1	CE32962 | WBGene00012605 | WP:CE32962 | Y38F1A.1
UTGB	GTSSWA201863.01	outron	Y38F1A.6	Y38F1A.6.4	chrII	12996262	-	2079	12.97	160	156	CE24222 | WBGene00012608 | WP:CE24222 | Y38F1A.6 | Y38F1A.6.1 | Y38F1A.6.2 | Y38F1A.6.3 | Y38F1A.6.4 | Y38F1A.6.5 | Y38F1A.6.6 | Y38F1A.6.7
UTGB	GTSSWA201864.01	outron	oig-2	Y38F1A.9	chrII	13008098	-	26	10.83	25	24	CE21614 | WBGene00003860 | WP:CE21614 | Y38F1A.9 | oig-2
UTGB	GTSSWA201865.03	outron	F18A11.5	F18A11.5	chrII	13014812	-	44	0.5613	2422	2377	CE44375 | CE44395 | F18A11.5 | F18A11.5a | F18A11.5b | WBGene00008932 | WP:CE44375 | WP:CE44395
UTGB	GTSSWA201866.03	exon	F18A11.3	F18A11.3	chrII	13036765	-	1849	1.653	54	-1	CE09453 | F18A11.3 | WBGene00008930 | WP:CE09453
UTGB	GTSSWA201867.01	exon	F42G4.2	F42G4.2	chrII	13047847	+	63	1.732	48	-1	CE37914 | F42G4.2 | WBGene00009641 | WP:CE37914
UTGB	GTSSWA201868.01	outron	zyx-1	F42G4.3a.1	chrII	13056804	+	91	4.037	256	199	CE20775 | CE23716 | F42G4.3 | F42G4.3a | F42G4.3a.1 | F42G4.3a.2 | F42G4.3a.3 | F42G4.3b | F42G4.3b.1 | F42G4.3b.2 | F42G4.3b.3 | WBGene00006999 | WP:CE20775 | WP:CE23716 | zyx-1
UTGB	GTSSWA201869.01	outron	F42G4.6	F42G4.6	chrII	13077961	+	12	0	1363	927	CE20776 | F42G4.6 | WBGene00009643 | WP:CE20776
UTGB	GTSSWA201870.04	outron	gcn-2	Y81G3A.3	chrII	13083919	+	82	1.854	158	155	CE23118 | CE44294 | WBGene00013591 | WP:CE23118 | WP:CE44294 | Y81G3A.3 | Y81G3A.3a | Y81G3A.3b | gcn-2
UTGB	GTSSWA201871.01	exon	Y81G3A.4	Y81G3A.4	chrII	13091028	+	10	3.957	442	-1	CE44336 | CE44347 | WBGene00013592 | WP:CE44336 | WP:CE44347 | Y81G3A.4 | Y81G3A.4a | Y81G3A.4b
UTGB	GTSSWA201872.01	outron	rict-1	F29C12.3	chrII	13116739	-	14	0	29	26	CE43301 | F29C12.3 | WBGene00009245 | WP:CE43301 | lpo-6 | rict-1
UTGB	GTSSWA201873.01	exon	F32A11.3	F32A11.3	chrII	13153304	-	75	0	79	-1	CE17739 | F32A11.3 | WBGene00009308 | WP:CE17739
UTGB	GTSSWA201874.05	exon	mecr-1	W09H1.5	chrII	13187238	-	335	0.4822	56	-1	CE16575 | W09H1.5 | WBGene00012375 | WP:CE16575 | mecr-1
UTGB	GTSSWA201875.01	outron	btf-1	F15D4.1	chrII	13199389	+	15	2.266	690	684	CE42370 | F15D4.1 | WBGene00000274 | WP:CE42370 | btf-1
UTGB	GTSSWA201876.01	outron	F15D4.5	F15D4.5	chrII	13245267	+	27	0	71	13	CE36131 | F15D4.5 | WBGene00008862 | WP:CE36131
UTGB	GTSSWA201877.03	outron	Y48E1C.4	Y48E1C.4b	chrII	13437086	-	14	2.076	358	352	CE32977 | CE32978 | WBGene00013017 | WP:CE32977 | WP:CE32978 | Y48E1C.4 | Y48E1C.4a | Y48E1C.4b
UTGB	GTSSWA201878.01	outron	tbc-14	E01G4.1	chrII	13448701	-	13	0	1228	1199	CE15754 | E01G4.1 | WBGene00008444 | WP:CE15754 | tbc-14
UTGB	GTSSWA201879.01	outron	pqn-27	E01G4.4	chrII	13460722	-	10	0	171	171	CE40553 | E01G4.4 | WBGene00004116 | WP:CE40553 | pqn-27
UTGB	GTSSWA201880.01	exon	E01G4.5	E01G4.5	chrII	13472313	+	123	1.622	131	-1	CE23623 | E01G4.5 | WBGene00008447 | WP:CE23623
UTGB	GTSSWA201882.01	outron	E01G4.6	E01G4.6	chrII	13480867	+	36	1.519	1447	1446	CE15755 | E01G4.6 | E01G4.6.1 | E01G4.6.2 | WBGene00008448 | WP:CE15755
UTGB	GTSSWA201883.01	exon	drr-1	F45H10.4	chrII	13495782	-	61	10.94	81	-1	CE10548 | F45H10.4 | WBGene00009741 | WP:CE10548 | drr-1
UTGB	GTSSWA201884.01	exon	F54F11.2	F54F11.2	chrII	13507727	+	47	0.7012	12	-1	CE11095 | CE43217 | F54F11.2 | F54F11.2a | F54F11.2b | F54F11.2b.1 | F54F11.2b.2 | WBGene00010070 | WP:CE11095 | WP:CE43217
UTGB	GTSSWA201885.01	outron	Y48E1B.2	Y48E1B.2a	chrII	13541680	-	12	0	700	687	CE28989 | CE28990 | WBGene00013001 | WP:CE28989 | WP:CE28990 | Y48E1B.2 | Y48E1B.2a | Y48E1B.2b | Y48E1B.2b.1 | Y48E1B.2b.2 | Y48E1B.2b.3
UTGB	GTSSWA201886.02	exon	clec-146	Y48E1B.9	chrII	13593681	-	13	0.8987	39	-1	CE36239 | CE43324 | WBGene00013008 | WP:CE36239 | WP:CE43324 | Y48E1B.9 | Y48E1B.9a | Y48E1B.9b | Y48E1B.9b.1 | Y48E1B.9b.2 | Y48E1B.9b.3 | clec-146
UTGB	GTSSWA201887.01	outron	fbxc-23	Y48E1B.11	chrII	13597666	-	167	0	1214	1208	CE44418 | WBGene00013009 | WP:CE44418 | Y48E1B.11 | fbxc-23 | fbxc-56
UTGB	GTSSWA201888.01	exon	gst-20	Y48E1B.10	chrII	13609688	-	256	1.433	54	-1	CE14870 | WBGene00001768 | WP:CE14870 | Y48E1B.10 | gst-20
UTGB	GTSSWA201889.01	exon	gst-24	F37B1.1	chrII	13611210	-	26	0	7	-1	CE17789 | F37B1.1 | WBGene00001772 | WP:CE17789 | gst-24
UTGB	GTSSWA201890.01	outron	gst-12	F37B1.2	chrII	13617849	-	27	1.153	30	30	CE09989 | F37B1.2 | WBGene00001760 | WP:CE09989 | gst-12
UTGB	GTSSWA201891.01	exon	gst-16	F37B1.5	chrII	13624360	-	13	0	18	-1	CE09992 | F37B1.5 | WBGene00001764 | WP:CE09992 | gst-16
UTGB	GTSSWA201892.01	outron	C31C9.2	C31C9.2.1	chrII	13638475	-	44	0.6006	87	86	C31C9.2 | C31C9.2.1 | C31C9.2.2 | CE08497 | WBGene00007836 | WP:CE08497
UTGB	GTSSWA201893.01	outron	fbxa-167	C31C9.3	chrII	13641412	+	14	0	58	40	C31C9.3 | CE08498 | WBGene00007837 | WP:CE08498 | fbxa-167
UTGB	GTSSWA201894.01	outron	Y54G9A.4	Y54G9A.4	chrII	13715780	-	23	2.29	28	16	CE19232 | WBGene00013207 | WP:CE19232 | Y54G9A.4
UTGB	GTSSWA201895.01	outron	R06B9.5	R06B9.5	chrII	13734228	+	11	2.099	2032	2032	CE23900 | R06B9.5 | WBGene00011056 | WP:CE23900
UTGB	GTSSWA201896.02	exon	C01B9.1	C01B9.1b	chrII	13771482	+	44	3.289	62	-1	C01B9.1 | C01B9.1a | C01B9.1b | CE41752 | CE41753 | WBGene00007220 | WP:CE41752 | WP:CE41753
UTGB	GTSSWA201897.01	exon	F08G2.5	F08G2.5	chrII	13833552	-	26	0	11	-1	CE19777 | F08G2.5 | WBGene00008577 | WP:CE19777
UTGB	GTSSWA201898.01	exon	ins-37	F08G2.6	chrII	13835610	-	23	0	42	-1	CE19778 | F08G2.6 | WBGene00002120 | WP:CE19778 | ins-37
UTGB	GTSSWA201899.02	exon	Y51H1A.1	Y51H1A.1b	chrII	13860918	-	16	0.6556	35	-1	CE20282 | CE32757 | CE41282 | WBGene00013092 | WP:CE20282 | WP:CE32757 | WP:CE41282 | Y51H1A.1 | Y51H1A.1a | Y51H1A.1b | Y51H1A.1c | Y51H1A.1c.1 | Y51H1A.1c.2 | Y51H1A.1c.3 | Y51H1A.1c.4 | Y51H1A.1c.5 | Y51H1A.1c.6
UTGB	GTSSWA201900.02	outron	Y51H1A.3	Y51H1A.3a	chrII	13872686	+	14	0.9452	91	89	CE20284 | CE20285 | WBGene00013094 | WP:CE20284 | WP:CE20285 | Y51H1A.3 | Y51H1A.3a | Y51H1A.3a.1 | Y51H1A.3a.2 | Y51H1A.3b
UTGB	GTSSWA201901.01	outron	ing-3	Y51H1A.4	chrII	13875259	+	25	0.7387	709	681	CE20286 | WBGene00013095 | WP:CE20286 | Y51H1A.4 | ing-3
UTGB	GTSSWA201902.01	outron	hda-6	Y51H1A.5.1	chrII	13882216	+	17	5.292	403	395	CE24411 | WBGene00001838 | WP:CE24411 | Y51H1A.5 | Y51H1A.5.1 | Y51H1A.5.2 | hda-6
UTGB	GTSSWA201903.01	outron	W02B8.2	W02B8.2	chrII	13908753	+	10	2.968	76	72	CE20131 | W02B8.2 | WBGene00012198 | WP:CE20131
UTGB	GTSSWA201904.06	exon	Y39G8B.9	Y39G8B.9	chrII	13981269	+	2642	0.441	11	-1	CE21736 | WBGene00012728 | WP:CE21736 | Y39G8B.9
UTGB	GTSSWA201905.01	exon	Y39G8B.10	Y39G8B.10	chrII	13982956	-	10	0	42	-1	CE35081 | WBGene00012729 | WP:CE35081 | Y39G8B.10
UTGB	GTSSWA201906.01	outron	F01D5.1	F01D5.1	chrII	13997500	-	297	6.561	24	17	CE18559 | F01D5.1 | WBGene00008492 | WP:CE18559
UTGB	GTSSWA201907.04	exon	F01D5.2	F01D5.2	chrII	13998865	-	275	0.4604	11	-1	CE18560 | F01D5.2 | WBGene00008493 | WP:CE18560
UTGB	GTSSWA201908.05	exon	F01D5.3	F01D5.3	chrII	13999937	-	981	0.7688	3	-1	CE18561 | F01D5.3 | F01D5.3.1 | F01D5.3.2 | WBGene00008494 | WP:CE18561
UTGB	GTSSWA201909.03	exon	F01D5.5	F01D5.5	chrII	14002204	-	62	0.4788	8	-1	CE18562 | F01D5.5 | WBGene00008495 | WP:CE18562
UTGB	GTSSWA201910.01	outron	F01D5.8	F01D5.8	chrII	14010620	+	11	0	1832	541	CE18565 | F01D5.8 | WBGene00008498 | WP:CE18565
UTGB	GTSSWA201911.01	outron	daf-5	W01G7.1	chrII	14040204	-	124	4.128	2585	2578	CE18985 | W01G7.1 | WBGene00000901 | WP:CE18985 | daf-5
UTGB	GTSSWA201912.01	outron	rpb-11	W01G7.3	chrII	14059964	+	10	0	29	24	CE18986 | W01G7.3 | W01G7.3.1 | W01G7.3.2 | WBGene00012187 | WP:CE18986 | rpb-11
UTGB	GTSSWA201913.02	outron	lem-2	W01G7.5	chrII	14063336	+	23	7.594	22	19	CE20129 | W01G7.5 | WBGene00002275 | WP:CE20129 | lem-2
UTGB	GTSSWA201914.01	exon	Y39G8C.2	Y39G8C.2	chrII	14097360	-	39	0	66	-1	CE20236 | WBGene00012731 | WP:CE20236 | Y39G8C.2
UTGB	GTSSWA201916.01	exon	K09E4.1	K09E4.1	chrII	14137733	+	20	0	56	-1	CE19994 | K09E4.1 | WBGene00010719 | WP:CE19994
UTGB	GTSSWA201915.01	exon	cacn-1	W03H9.4	chrII	14142079	-	82	4.127	49	-1	CE20137 | W03H9.4 | WBGene00012230 | WP:CE20137 | cacn-1
UTGB	GTSSWA201917.05	outron	rpl-43	Y48B6A.2.1	chrII	14154528	+	60	2.094	669	664	CE22117 | WBGene00004456 | WP:CE22117 | Y48B6A.2 | Y48B6A.2.1 | Y48B6A.2.2 | Y48B6A.2.3 | rpl-43
UTGB	GTSSWA201918.01	exon	Y48B6A.5	Y48B6A.5	chrII	14175111	-	28	0	33	-1	CE22120 | WBGene00012979 | WP:CE22120 | Y48B6A.5
UTGB	GTSSWA201919.01	outron	men-1	Y48B6A.12.2	chrII	14233791	-	26	1.752	84	32	CE22127 | WBGene00012983 | WP:CE22127 | Y48B6A.12 | Y48B6A.12.1 | Y48B6A.12.2 | Y48B6A.12.3 | men-1
UTGB	GTSSWA201921.06	exon	Y54G11A.3	Y54G11A.3	chrII	14276566	+	282	2.582	50	-1	CE22474 | WBGene00013214 | WP:CE22474 | Y54G11A.3
UTGB	GTSSWA201922.01	outron	Y54G11A.4	Y54G11A.4	chrII	14291007	+	48	0	1719	1716	CE43439 | WBGene00013215 | WP:CE43439 | Y54G11A.4
UTGB	GTSSWA201923.01	outron	lin-7	Y54G11A.10a	chrII	14349531	-	22	0	222	222	CE43589 | CE43616 | WBGene00002996 | WP:CE43589 | WP:CE43616 | Y54G11A.10 | Y54G11A.10a | Y54G11A.10b | lin-7
UTGB	GTSSWA201924.01	outron	Y54G11A.11	Y54G11A.11.1	chrII	14349662	+	16	1.434	417	393	CE22483 | WBGene00013219 | WP:CE22483 | Y54G11A.11 | Y54G11A.11.1 | Y54G11A.11.2 | Y54G11A.11.3
UTGB	GTSSWA201925.02	outron	agl-1	R06A4.8	chrII	14357984	-	18	0	551	513	CE18115 | R06A4.8 | WBGene00011050 | WP:CE18115 | agl-1
UTGB	GTSSWA201926.01	outron	pfs-2	R06A4.9.1	chrII	14358097	+	11	0	292	280	CE21113 | R06A4.9 | R06A4.9.1 | R06A4.9.2 | WBGene00011051 | WP:CE21113 | pfs-2
UTGB	GTSSWA201927.01	outron	kbp-3	F26H11.1	chrII	14390055	-	10	0	87	74	2O676 | CE26712 | F26H11.1 | WBGene00009179 | WP:CE26712 | kbp-3
UTGB	GTSSWA201928.01	exon	F26H11.4	F26H11.4	chrII	14408554	+	28	2.407	99	-1	CE44392 | F26H11.4 | WBGene00009182 | WP:CE44392
UTGB	GTSSWA201929.02	outron	exl-1	F26H11.5	chrII	14413415	-	38	2.2	47	37	CE24922 | F26H11.5 | WBGene00001371 | WP:CE24922 | exl-1
UTGB	GTSSWA201930.01	outron	smg-8	K04B12.3	chrII	14441310	+	100	0.8427	32	26	CE41824 | K04B12.3 | WBGene00010551 | WP:CE41824 | smg-8
UTGB	GTSSWA201931.03	outron	K10H10.2	K10H10.2.1	chrII	14495314	-	72	0.8971	991	959	CE16252 | K10H10.2 | K10H10.2.1 | K10H10.2.2 | WBGene00010759 | WP:CE16252
UTGB	GTSSWA201932.02	exon	dhs-8	K10H10.3a	chrII	14496999	+	206	1.918	930	-1	CE16253 | K10H10.3 | K10H10.3a | K10H10.3b | WBGene00000972 | WP:CE16253 | dhs-8
UTGB	GTSSWA201933.02	exon	K10H10.4	K10H10.4	chrII	14500375	+	282	1.031	20	-1	CE41146 | K10H10.4 | WBGene00010760 | WP:CE41146
UTGB	GTSSWA201934.01	exon	K10H10.12	K10H10.12	chrII	14506247	-	30	0	99	-1	CE40978 | K10H10.12 | WBGene00045403 | WP:CE40978
UTGB	GTSSWA201935.01	exon	K10H10.7	K10H10.7	chrII	14507550	-	19	1.521	15	-1	CE16256 | K10H10.7 | WBGene00010763 | WP:CE16256
UTGB	GTSSWA201936.01	exon	K10H10.10	K10H10.10	chrII	14507971	+	21	0	28	-1	CE34932 | K10H10.10 | WBGene00010765 | WP:CE34932
UTGB	GTSSWA201937.04	exon	F57C2.4	F57C2.4	chrII	14525216	+	1495	0.3778	8	-1	CE16155 | F57C2.4 | WBGene00010196 | WP:CE16155
UTGB	GTSSWA201938.04	outron	F57C2.5	F57C2.5.1	chrII	14528159	-	136	4.114	47	16	CE16156 | F57C2.5 | F57C2.5.1 | F57C2.5.2 | WBGene00010197 | WP:CE16156
UTGB	GTSSWA201939.01	exon	C04H5.7	C04H5.7a	chrII	14537894	+	50	3.08	12	-1	C04H5.7 | C04H5.7a | C04H5.7b | CE27793 | CE41101 | WBGene00007315 | WP:CE27793 | WP:CE41101
UTGB	GTSSWA201940.01	exon	C01G12.9	C01G12.9	chrII	14578921	+	12	0	290	-1	C01G12.9 | CE44271 | WBGene00007249 | WP:CE44271
UTGB	GTSSWA201941.02	outron	tps-2	F19H8.1	chrII	14598639	+	24	0	2173	2166	CE15872 | CE37507 | F19H8.1 | F19H8.3 | WBGene00000188 | WBGene00006603 | WP:CE15872 | WP:CE37507 | arl-3 | tps-2
UTGB	GTSSWA201942.01	exon	F19H8.2	F19H8.2	chrII	14605536	-	45	4.759	14	-1	CE15871 | F19H8.2 | WBGene00008963 | WP:CE15871
UTGB	GTSSWA201943.02	exon	mltn-9	F19H8.4	chrII	14616018	+	50	0	21	-1	CE32632 | F19H8.4 | WBGene00008964 | WP:CE32632 | mltn-9
UTGB	GTSSWA201944.01	exon	C38C6.3	C38C6.3	chrII	14633066	+	20	0	36	-1	C38C6.3 | CE15695 | WBGene00007996 | WP:CE15695
UTGB	GTSSWA201945.01	outron	unc-52	ZC101.2e	chrII	14667231	-	17	0	475	384	CE15028 | CE15030 | CE15034 | CE18424 | CE37074 | CE43275 | WBGene00006787 | WP:CE15028 | WP:CE15030 | WP:CE15034 | WP:CE18424 | WP:CE37074 | WP:CE43275 | ZC101.2 | ZC101.2a | ZC101.2b | ZC101.2c | ZC101.2d | ZC101.2e | ZC101.2f | unc-52
UTGB	GTSSWA201946.01	outron	Y54E2A.4	Y54E2A.4	chrII	14754183	+	10	0	388	369	CE43325 | WBGene00013189 | WP:CE43325 | Y54E2A.4
UTGB	GTSSWA201947.02	exon	Y54E2A.7	Y54E2A.7	chrII	14772892	-	49	1.309	28	-1	CE20306 | WBGene00013192 | WP:CE20306 | Y54E2A.7
UTGB	GTSSWA201948.02	exon	Y54E2A.9	Y54E2A.9	chrII	14785920	-	47	0.4929	22	-1	CE20308 | WBGene00013194 | WP:CE20308 | Y54E2A.9
UTGB	GTSSWA201949.04	outron	tbc-20	Y54E2A.12	chrII	14797887	+	15	0	501	487	CE37068 | WBGene00013196 | WP:CE37068 | Y54E2A.12 | tbc-20
UTGB	GTSSWA201950.01	exon	W01D2.3	W01D2.3	chrII	14804211	-	43	0	57	-1	CE41164 | W01D2.3 | WBGene00012180 | WP:CE41164
UTGB	GTSSWA201951.01	outron	W01D2.1	W01D2.1.2	chrII	14815079	+	36	10.3	341	341	CE18312 | W01D2.1 | W01D2.1.1 | W01D2.1.2 | W01D2.1.3 | W01D2.1.4 | WBGene00012179 | WP:CE18312
UTGB	GTSSWA201952.02	exon	cdh-7	R05H10.6	chrII	14843139	+	19	0	91	-1	CE38092 | R05H10.6 | WBGene00000399 | WP:CE38092 | cdh-7
UTGB	GTSSWA201953.01	outron	Y53F4B.1	Y53F4B.1	chrII	14958153	-	10	0	61	57	CE35672 | WBGene00013149 | WP:CE35672 | Y53F4B.1
UTGB	GTSSWA201954.02	outron	Y53F4B.13	Y53F4B.13	chrII	15025983	+	24	0	115	85	CE35673 | WBGene00013160 | WP:CE35673 | Y53F4B.13
UTGB	GTSSWA201955.01	exon	Y53F4B.19	Y53F4B.19	chrII	15077160	+	46	1.047	15	-1	CE22409 | WBGene00013165 | WP:CE22409 | Y53F4B.19
UTGB	GTSSWA201956.06	exon	Y53F4B.23	Y53F4B.23	chrII	15124439	+	113	0.4541	1125	-1	CE35676 | WBGene00013169 | WP:CE35676 | Y53F4B.23 | Y53F4B.23.1 | Y53F4B.23.2
UTGB	GTSSWA201957.01	exon	Y53F4B.24	Y53F4B.24	chrII	15134321	-	37	2.097	397	-1	CE24419 | WBGene00013170 | WP:CE24419 | Y53F4B.24
UTGB	GTSSWA201958.02	outron	gst-26	Y53F4B.29.1	chrII	15164468	-	10	2.994	22	12	CE22416 | WBGene00001774 | WP:CE22416 | Y53F4B.29 | Y53F4B.29.1 | Y53F4B.29.2 | gst-26
UTGB	GTSSWA201960.01	outron	gst-28	Y53F4B.31.1	chrII	15167390	-	13	0	95	81	CE22418 | WBGene00001776 | WP:CE22418 | Y53F4B.31 | Y53F4B.31.1 | Y53F4B.31.2 | gst-28
UTGB	GTSSWA201961.01	exon	Y53F4B.36	Y53F4B.36	chrII	15175845	+	13	0	44	-1	CE35677 | WBGene00013175 | WP:CE35677 | Y53F4B.36
UTGB	GTSSWA201962.01	exon	spsb-2	Y46E12BL.3	chrII	15230256	+	54	2.326	111	-1	CE39848 | WBGene00021596 | WP:CE39848 | Y46E12BL.3 | spsb-2
UTGB	GTSSWA201963.01	exon	fbxa-6	cTel54X.1	chrIII	3084	-	23	1.15	166	-1	CE20619 | WBGene00008352 | WP:CE20619 | cTel54X.1 | fbxa-6
UTGB	GTSSWA201964.04	exon	nhr-80	H10E21.3a	chrIII	14814	-	55	0	60	-1	CE19488 | CE28733 | H10E21.3 | H10E21.3a | H10E21.3b | WBGene00003670 | WP:CE19488 | WP:CE28733 | nhr-80
UTGB	GTSSWA201965.01	outron	H10E21.1	H10E21.1	chrIII	15511	+	33	1.544	1296	301	CE32456 | CE44081 | H10E21.1 | H10E21.1a | H10E21.1b | WBGene00019182 | WP:CE32456 | WP:CE44081
UTGB	GTSSWA201966.02	exon	H10E21.4	H10E21.4	chrIII	19615	-	773	0.9061	51	-1	CE19489 | H10E21.4 | WBGene00019184 | WP:CE19489
UTGB	GTSSWA201967.04	outron	W05G11.6	W05G11.6d.1	chrIII	67150	-	242	5.528	894	890	CE14634 | CE19610 | CE32740 | CE32741 | W05G11.6 | W05G11.6a | W05G11.6a.1 | W05G11.6a.2 | W05G11.6b | W05G11.6b.1 | W05G11.6b.2 | W05G11.6b.3 | W05G11.6c | W05G11.6d | W05G11.6d.1 | W05G11.6d.2 | W05G11.6d.3 | WBGene00021043 | WP:CE14634 | WP:CE19610 | WP:CE32740 | WP:CE32741
UTGB	GTSSWA201968.01	outron	F54C4.3	F54C4.3	chrIII	86438	-	15	0	61	54	CE19892 | CE42911 | F54C4.3 | F54C4.3a | F54C4.3b | WBGene00018794 | WP:CE19892 | WP:CE42911
UTGB	GTSSWA201969.01	outron	F54C4.4	F54C4.4	chrIII	87335	-	16	4.126	76	66	CE19893 | F54C4.4 | WBGene00018795 | WP:CE19893
UTGB	GTSSWA201970.01	outron	C29F9.4	C29F9.4	chrIII	120445	+	37	2.499	46	37	C29F9.4 | CE39229 | WBGene00016219 | WP:CE39229
UTGB	GTSSWA201971.01	exon	fbxb-82	T17A3.4	chrIII	143235	-	17	0	18	-1	CE19582 | T17A3.4 | WBGene00020542 | WP:CE19582 | fbxb-82
UTGB	GTSSWA201972.02	exon	fbxb-83	T17A3.6	chrIII	144579	-	12	0	77	-1	CE29343 | T17A3.6 | WBGene00020543 | WP:CE29343 | fbxb-83
UTGB	GTSSWA201973.01	exon	fbxb-84	T17A3.7	chrIII	146481	-	25	2.368	18	-1	CE19584 | T17A3.7 | WBGene00020544 | WP:CE19584 | fbxb-84 | vet-3
UTGB	GTSSWA201974.01	exon	F40G9.14	F40G9.14	chrIII	179111	-	43	1.05	1296	-1	CE19861 | F40G9.14 | WBGene00018248 | WP:CE19861
UTGB	GTSSWA201975.01	exon	F40G9.5	F40G9.5	chrIII	183279	+	54	0.9896	65	-1	CE42113 | F40G9.5 | WBGene00018241 | WP:CE42113
UTGB	GTSSWA201976.01	outron	Y50D7A.4	Y50D7A.4.1	chrIII	235434	+	20	1.318	415	409	CE35099 | WBGene00021754 | WP:CE35099 | Y50D7A.4 | Y50D7A.4.1 | Y50D7A.4.2
UTGB	GTSSWA201977.01	outron	Y50D7A.11	Y50D7A.11	chrIII	264718	+	13	4.222	378	371	CE35098 | WBGene00021759 | WP:CE35098 | Y50D7A.11
UTGB	GTSSWA201978.01	outron	Y50D7A.10	Y50D7A.10.1	chrIII	314966	+	14	0	495	493	CE39439 | WBGene00021758 | WP:CE39439 | Y50D7A.10 | Y50D7A.10.1 | Y50D7A.10.2
UTGB	GTSSWA201979.01	outron	Y50D7A.8	Y50D7A.8	chrIII	344868	-	14	0.9452	1646	1627	CE39440 | WBGene00021756 | WP:CE39440 | Y50D7A.8 | Y50D7A.8.1 | Y50D7A.8.2
UTGB	GTSSWA201980.01	outron	gei-4	W07B3.2a.1	chrIII	349766	-	10	0	1366	1339	CE17290 | CE17291 | CE34603 | CE34604 | CE37419 | CE42180 | W07B3.2 | W07B3.2a | W07B3.2a.1 | W07B3.2a.2 | W07B3.2b | W07B3.2c | W07B3.2c.1 | W07B3.2c.2 | W07B3.2d | W07B3.2e | W07B3.2e.1 | W07B3.2e.2 | W07B3.2f | WBGene00001561 | WP:CE17290 | WP:CE17291 | WP:CE34603 | WP:CE34604 | WP:CE37419 | WP:CE42180 | gei-4
UTGB	GTSSWA201981.01	outron	Y55B1BL.1	Y55B1BL.1	chrIII	402479	+	16	0	1095	1022	CE41731 | WBGene00021909 | WP:CE41731 | Y55B1BL.1
UTGB	GTSSWA201982.01	outron	Y55B1BR.3	Y55B1BR.3	chrIII	429302	+	12	0	51	35	CE24463 | WBGene00021913 | WP:CE24463 | Y55B1BR.3
UTGB	GTSSWA201983.01	exon	Y55B1BR.6	Y55B1BR.6	chrIII	463810	-	43	0.5453	92	-1	CE38754 | WBGene00044401 | WP:CE38754 | Y55B1BR.6
UTGB	GTSSWA201984.02	exon	B0353.1	B0353.1b	chrIII	557521	+	118	0.4285	5	-1	B0353.1 | B0353.1a | B0353.1b | CE27571 | CE41606 | WBGene00015155 | WP:CE27571 | WP:CE41606
UTGB	GTSSWA201985.01	outron	Y55B1AR.2	Y55B1AR.2a	chrIII	598233	-	15	0	130	118	CE34129 | CE43989 | WBGene00021906 | WP:CE34129 | WP:CE43989 | Y55B1AR.2 | Y55B1AR.2a | Y55B1AR.2b
UTGB	GTSSWA201986.01	outron	lec-6	Y55B1AR.1.1	chrIII	600758	-	91	1.225	402	394	CE22493 | WBGene00002269 | WP:CE22493 | Y55B1AR.1 | Y55B1AR.1.1 | Y55B1AR.1.2 | Y55B1AR.1.3 | lec-6
UTGB	GTSSWA201987.01	exon	Y55B1AR.4	Y55B1AR.4	chrIII	605509	-	18	0	31	-1	CE22490 | WBGene00021908 | WP:CE22490 | Y55B1AR.4
UTGB	GTSSWA201988.02	exon	ttr-7	T19C3.9	chrIII	606026	+	73	6.222	45	-1	CE35018 | T19C3.9 | WBGene00020566 | WP:CE35018 | ttr-7
UTGB	GTSSWA201989.01	outron	T19C3.2	T19C3.2	chrIII	617465	-	11	0.9082	60	18	CE02053 | T19C3.2 | WBGene00020560 | WP:CE02053
UTGB	GTSSWA201990.05	exon	T19C3.5	T19C3.5	chrIII	627763	-	77	0	24	-1	CE29347 | T19C3.5 | WBGene00020563 | WP:CE29347
UTGB	GTSSWA201991.02	outron	fem-2	T19C3.8	chrIII	634699	-	49	0.5961	129	75	CE02878 | T19C3.8 | WBGene00001412 | WP:CE02878 | fem-2 | isx-2
UTGB	GTSSWA201992.01	outron	tag-266	W06E11.5a	chrIII	640379	-	13	0	171	155	CE01430 | CE26024 | W06E11.5 | W06E11.5a | W06E11.5b | WBGene00044319 | WP:CE01430 | WP:CE26024 | chic | tag-266
UTGB	GTSSWA201993.01	exon	W06E11.7	W06E11.7	chrIII	647506	+	16	2.333	65	-1	W06E11.7
UTGB	GTSSWA201994.01	outron	W02B3.4	W02B3.4	chrIII	683399	-	12	0	75	74	CE34600 | W02B3.4 | WBGene00020924 | WP:CE34600
UTGB	GTSSWA201995.01	outron	F42G9.1	F42G9.1a	chrIII	783547	+	63	15.32	173	162	CE07231 | CE30788 | F42G9.1 | F42G9.1a | F42G9.1a.1 | F42G9.1a.2 | F42G9.1b | WBGene00018362 | WP:CE07231 | WP:CE30788
UTGB	GTSSWA201996.01	exon	snt-2	F42G9.7	chrIII	793514	-	22	1.241	17	-1	CE37915 | F42G9.7 | WBGene00004922 | WP:CE37915 | snt-2
UTGB	GTSSWA201997.01	exon	daf-7	B0412.2	chrIII	811821	+	21	3.331	110	-1	B0412.2 | CE01758 | WBGene00000903 | WP:CE01758 | daf-7
UTGB	GTSSWA201998.01	outron	zip-2	K02F3.4.2	chrIII	833967	+	89	0.4671	485	330	CE23848 | K02F3.4 | K02F3.4.1 | K02F3.4.2 | WBGene00019327 | WP:CE23848 | zip-2
UTGB	GTSSWA201999.02	exon	K02F3.9	K02F3.9	chrIII	841348	-	714	0.5295	33	-1	CE01355 | K02F3.9 | WBGene00019332 | WP:CE01355
UTGB	GTSSWA202000.01	outron	rnp-5	K02F3.11.1	chrIII	854103	-	11	0	206	205	CE29981 | K02F3.11 | K02F3.11.1 | K02F3.11.2 | WBGene00004388 | WP:CE29981 | rnp-5
UTGB	GTSSWA202001.02	exon	tag-51	K02F3.1	chrIII	854218	+	67	0.485	9	-1	CE31028 | K02F3.1 | WBGene00006430 | WP:CE31028 | tag-51
UTGB	GTSSWA202002.01	outron	T24C4.2	T24C4.2	chrIII	870595	-	18	0	746	739	CE19593 | T24C4.2 | WBGene00020758 | WP:CE19593
UTGB	GTSSWA202003.01	exon	T24C4.4	T24C4.4	chrIII	873518	-	26	0	54	-1	CE39413 | T24C4.4 | WBGene00020760 | WP:CE39413
UTGB	GTSSWA202004.01	outron	ucr-2.3	T24C4.1	chrIII	879812	+	11	3.759	40	35	CE19592 | T24C4.1 | T24C4.1.1 | T24C4.1.2 | WBGene00020757 | WP:CE19592 | ucr-2.3
UTGB	GTSSWA202005.01	outron	zer-1	T24C4.6a	chrIII	889084	-	55	0.4566	2330	2307	CE39414 | CE39415 | T24C4.6 | T24C4.6a | T24C4.6a.1 | T24C4.6a.2 | T24C4.6b | WBGene00020762 | WP:CE39414 | WP:CE39415 | zer-1
UTGB	GTSSWA202006.01	exon	T24C4.9	T24C4.9	chrIII	891166	-	38	0	645	-1	T24C4.9
UTGB	GTSSWA202007.04	exon	ztf-18	T24C4.7	chrIII	895625	-	267	0.7989	33	-1	CE43501 | T24C4.7 | WBGene00020763 | WP:CE43501 | ztf-18
UTGB	GTSSWA202008.02	exon	F23H11.2	F23H11.2	chrIII	895746	+	45	8.245	27	-1	CE34542 | F23H11.2 | WBGene00017758 | WP:CE34542
UTGB	GTSSWA202009.03	outron	F23H11.3	F23H11.3.1	chrIII	901431	-	50	2.07	44	37	CE09611 | F23H11.3 | F23H11.3.1 | F23H11.3.2 | WBGene00017759 | WP:CE09611
UTGB	GTSSWA202010.01	outron	F23H11.5	F23H11.5.2	chrIII	912984	-	30	0	2415	2414	CE09613 | F23H11.5 | F23H11.5.1 | F23H11.5.2 | F23H11.5.3 | WBGene00000263 | WP:CE09613
UTGB	GTSSWA202011.01	exon	fbxa-22	T12B5.5	chrIII	936362	+	11	0	2494	-1	CE32722 | T12B5.5 | WBGene00020452 | WP:CE32722 | fbxa-22
UTGB	GTSSWA202012.01	outron	fbxa-60	T12B5.10	chrIII	947314	-	24	0	1048	1036	CE20067 | T12B5.10 | WBGene00020456 | WP:CE20067 | fbxa-60
UTGB	GTSSWA202013.03	outron	fbxa-67	T12B5.11	chrIII	950591	-	101	8.075	105	69	CE20068 | T12B5.11 | WBGene00020457 | WP:CE20068 | fbxa-67
UTGB	GTSSWA202014.01	outron	fbxa-10	T12B5.3	chrIII	952440	+	21	0	91	78	CE20061 | T12B5.3 | WBGene00020450 | WP:CE20061 | fbxa-10
UTGB	GTSSWA202015.01	outron	R06B10.2	R06B10.2	chrIII	980430	-	39	0	1905	901	CE39395 | R06B10.2 | WBGene00019913 | WP:CE39395
UTGB	GTSSWA202016.03	exon	clec-150	R06B10.3	chrIII	1002694	+	5780	3.571	20	-1	CE26979 | R06B10.3 | WBGene00019914 | WP:CE26979 | clec-150
UTGB	GTSSWA202017.03	exon	Y34F4.2	Y34F4.2a	chrIII	1010540	+	55	1.505	7	-1	CE26642 | CE41717 | WBGene00021337 | WP:CE26642 | WP:CE41717 | Y34F4.2 | Y34F4.2a | Y34F4.2b
UTGB	GTSSWA202018.01	exon	Y34F4.1	Y34F4.1b	chrIII	1020948	+	218	6.466	20	-1	CE26643 | CE41716 | WBGene00021336 | WP:CE26643 | WP:CE41716 | Y34F4.1 | Y34F4.1a | Y34F4.1b
UTGB	GTSSWA202019.08	exon	Y34F4.5	Y34F4.5	chrIII	1028344	-	150	3.678	24	-1	CE32243 | WBGene00021340 | WP:CE32243 | Y34F4.5
UTGB	GTSSWA202020.01	outron	rab-18	Y92C3B.3b	chrIII	1080717	-	36	0	247	247	CE27340 | CE34438 | WBGene00004277 | WP:CE27340 | WP:CE34438 | Y92C3B.3 | Y92C3B.3a | Y92C3B.3b | pra-1 | rab-18
UTGB	GTSSWA202021.02	exon	Y71D11A.3	Y71D11A.3a	chrIII	1116448	+	134	1.799	65	-1	ACMSD | CE25548 | CE32030 | WBGene00022104 | WP:CE25548 | WP:CE32030 | Y71D11A.3 | Y71D11A.3a | Y71D11A.3b
UTGB	GTSSWA202022.03	outron	Y119D3B.11	Y119D3B.11.1	chrIII	1207104	+	50	4.515	1026	1019	CE32745 | WBGene00022488 | WP:CE32745 | Y119D3B.11 | Y119D3B.11.1 | Y119D3B.11.2
UTGB	GTSSWA202023.02	outron	pes-4	Y119D3B.17	chrIII	1222186	-	16	0	123	123	CE32513 | WBGene00003978 | WP:CE32513 | Y119D3B.17 | pes-4
UTGB	GTSSWA202024.02	exon	fbxa-61	Y119D3B.8	chrIII	1239281	+	27	0	32	-1	CE39433 | WBGene00022486 | WP:CE39433 | Y119D3B.8 | fbxa-61
UTGB	GTSSWA202025.01	outron	fbxa-76	Y119D3B.22	chrIII	1249189	-	18	0	45	44	CE39432 | WBGene00044675 | WP:CE39432 | Y119D3B.22 | fbxa-76
UTGB	GTSSWA202026.01	outron	fbxa-77	Y119D3B.6	chrIII	1249483	+	45	0.81	26	25	CE27463 | WBGene00022484 | WP:CE27463 | Y119D3B.6 | fbxa-77
UTGB	GTSSWA202027.01	outron	fbxa-29	ZC47.3	chrIII	1273699	-	14	0	32	18	CE14998 | WBGene00013836 | WP:CE14998 | ZC47.3 | fbxa-29
UTGB	GTSSWA202028.01	exon	Y82E9BL.18	Y82E9BL.18	chrIII	1326769	+	139	0.4594	1865	-1	CE44113 | WBGene00044402 | WP:CE44113 | Y82E9BL.18
UTGB	GTSSWA202029.01	outron	fbxa-26	Y82E9BL.7	chrIII	1342661	-	13	0	176	155	CE39196 | WBGene00022324 | WP:CE39196 | Y82E9BL.7 | fbxa-26
UTGB	GTSSWA202030.01	outron	fbxa-27	Y82E9BL.17	chrIII	1342751	+	10	2.994	235	211	CE39195 | WBGene00022333 | WP:CE39195 | Y82E9BL.17 | fbxa-27
UTGB	GTSSWA202031.01	exon	Y82E9BR.20	Y82E9BR.20.1	chrIII	1372826	+	23	0	1569	-1	CE29934 | WBGene00022352 | WP:CE29934 | Y82E9BR.20 | Y82E9BR.20.1 | Y82E9BR.20.2
UTGB	GTSSWA202032.01	outron	elc-1	Y82E9BR.15	chrIII	1419586	-	10	0	2408	2407	CE27039 | WBGene00001236 | WP:CE27039 | Y82E9BR.15 | elc-1
UTGB	GTSSWA202033.01	outron	Y82E9BR.3	Y82E9BR.3.2	chrIII	1418948	+	12	2.637	259	257	CE27044 | WBGene00022336 | WP:CE27044 | Y82E9BR.3 | Y82E9BR.3.1 | Y82E9BR.3.2 | Y82E9BR.3.3 | Y82E9BR.3.4 | Y82E9BR.3.5
UTGB	GTSSWA202034.01	outron	ave-1	M01G5.6	chrIII	1495994	-	10	0	78	28	CE38620 | M01G5.6 | WBGene00044341 | WP:CE38620 | ave-1
UTGB	GTSSWA202035.01	exon	M01G5.1	M01G5.1	chrIII	1496314	+	14	0	1692	-1	CE19536 | M01G5.1 | WBGene00019715 | WP:CE19536
UTGB	GTSSWA202036.01	outron	M01G5.3	M01G5.3	chrIII	1519989	-	10	2.548	2005	2005	CE29983 | M01G5.3 | WBGene00019716 | WP:CE29983
UTGB	GTSSWA202037.01	outron	Y67D2.4	Y67D2.4a	chrIII	1533807	+	11	0	76	67	CE42201 | CE42202 | WBGene00022054 | WP:CE42201 | WP:CE42202 | Y67D2.4 | Y67D2.4a | Y67D2.4b
UTGB	GTSSWA202038.01	outron	Y67D2.5	Y67D2.5	chrIII	1542010	-	781	0	1820	1817	CE39061 | WBGene00022055 | WP:CE39061 | Y67D2.5
UTGB	GTSSWA202039.01	outron	Y67D2.2	Y67D2.2	chrIII	1558701	+	37	0.6664	171	89	CE39059 | WBGene00022052 | WP:CE39059 | Y67D2.2
[truncated: 3,566 more rows]

## Sheet: all TSSs
URL	ID	TSS type	peak local ID	is representative?	gene name	chr	start position	strand	number of aligned reads in the best-fit Gaussian distribution	standard deviation of the best-fit Gaussian distribution	distance to the start codon	distance to the proximal SL1 site
UTGB	GTSSWA200001.01	outron	1	TRUE	Y74C9A.2.1	chrI	11289	+	11	0.7963	352	329
UTGB	GTSSWA200002.01	outron	1	FALSE	Y48G1C.9.2	chrI	91219	+	14	0	190	185
UTGB	GTSSWA200002.02	outron	2	TRUE	Y48G1C.9.2	chrI	91223	+	59	3.095	186	181
UTGB	GTSSWA200003.01	outron	1	TRUE	Y48G1C.1	chrI	93010	+	470	8.435	82	73
UTGB	GTSSWA200003.02	outron	2	FALSE	Y48G1C.1	chrI	93045	+	94	4.816	47	38
UTGB	GTSSWA200003.03	outron	3	FALSE	Y48G1C.1	chrI	93067	+	145	4.075	25	16
UTGB	GTSSWA200004.01	outron	1	FALSE	Y48G1C.8	chrI	109238	-	15	8.011	1478	1072
UTGB	GTSSWA200004.02	outron	2	FALSE	Y48G1C.8	chrI	109223	-	20	0.7913	1463	1057
UTGB	GTSSWA200004.03	outron	3	FALSE	Y48G1C.8	chrI	109221	-	21	1.097	1461	1055
UTGB	GTSSWA200004.04	outron	4	FALSE	Y48G1C.8	chrI	109203	-	21	5.897	1443	1037
UTGB	GTSSWA200004.05	outron	5	FALSE	Y48G1C.8	chrI	109150	-	118	2.69	1390	984
UTGB	GTSSWA200004.06	outron	6	FALSE	Y48G1C.8	chrI	109093	-	10	16.88	1333	927
UTGB	GTSSWA200004.07	outron	7	FALSE	Y48G1C.8	chrI	109020	-	24	4.576	1260	854
UTGB	GTSSWA200004.08	outron	8	FALSE	Y48G1C.8	chrI	109014	-	13	3.044	1254	848
UTGB	GTSSWA200004.09	outron	9	FALSE	Y48G1C.8	chrI	109003	-	15	3.496	1243	837
UTGB	GTSSWA200004.10	outron	10	TRUE	Y48G1C.8	chrI	109000	-	123	0.9814	1240	834
UTGB	GTSSWA200004.11	outron	11	FALSE	Y48G1C.8	chrI	108996	-	25	3.195	1236	830
UTGB	GTSSWA200004.12	outron	12	FALSE	Y48G1C.8	chrI	108986	-	14	4.671	1226	820
UTGB	GTSSWA200004.13	outron	13	FALSE	Y48G1C.8	chrI	108959	-	13	3.892	1199	793
UTGB	GTSSWA200004.14	outron	14	FALSE	Y48G1C.8	chrI	108946	-	33	3.447	1186	780
UTGB	GTSSWA200005.01	outron	1	FALSE	F53G12.1	chrI	110659	-	19	0	614	601
UTGB	GTSSWA200005.02	outron	2	FALSE	F53G12.1	chrI	110386	-	21	1.443	341	328
UTGB	GTSSWA200005.03	outron	3	TRUE	F53G12.1	chrI	110310	-	63	1.696	265	252
UTGB	GTSSWA200006.01	outron	1	FALSE	F53G12.10.2	chrI	110784	+	31	0.5518	271	254
UTGB	GTSSWA200006.02	outron	2	FALSE	F53G12.10.2	chrI	110790	+	28	1.371	265	248
UTGB	GTSSWA200006.03	outron	3	FALSE	F53G12.10.2	chrI	110800	+	36	1.005	255	238
UTGB	GTSSWA200006.04	outron	4	TRUE	F53G12.10.2	chrI	110837	+	45	1.407	218	201
UTGB	GTSSWA200007.01	outron	1	FALSE	F56C11.6a	chrI	171267	+	10	3.552	2155	2145
UTGB	GTSSWA200007.02	outron	2	FALSE	F56C11.6a	chrI	171283	+	11	0	2139	2129
UTGB	GTSSWA200007.03	outron	3	FALSE	F56C11.6a	chrI	171292	+	10	0	2130	2120
UTGB	GTSSWA200007.04	outron	4	TRUE	F56C11.6a	chrI	171298	+	12	0	2124	2114
UTGB	GTSSWA200007.05	outron	5	FALSE	F56C11.6a	chrI	172993	+	12	0	429	419
UTGB	GTSSWA200008.01	outron	1	TRUE	F56C11.3	chrI	182920	-	10	0	148	147
UTGB	GTSSWA200009.01	outron	1	TRUE	F56C11.4	chrI	183342	+	38	0.993	34	22
UTGB	GTSSWA200010.01	exon	1	FALSE	Y48G1BL.1	chrI	215961	+	19	0	220	-1
UTGB	GTSSWA200010.02	exon	2	TRUE	Y48G1BL.1	chrI	215969	+	39	0	212	-1
UTGB	GTSSWA200010.03	exon	3	FALSE	Y48G1BL.1	chrI	216000	+	22	2.679	181	-1
UTGB	GTSSWA200011.01	exon	1	TRUE	Y48G1BM.8	chrI	252505	-	65	0	924	-1
UTGB	GTSSWA200012.01	outron	1	FALSE	Y48G1BM.1	chrI	252052	+	20	0	67	62
UTGB	GTSSWA200012.02	outron	2	TRUE	Y48G1BM.1	chrI	252060	+	26	0	59	54
UTGB	GTSSWA200012.03	outron	3	FALSE	Y48G1BM.1	chrI	252092	+	10	1.699	27	22
UTGB	GTSSWA200013.01	exon	1	TRUE	C53D5.4	chrI	289122	-	46	12.89	46	-1
UTGB	GTSSWA200014.01	outron	1	FALSE	C53D5.1a	chrI	289213	+	13	0	2036	2003
UTGB	GTSSWA200014.02	outron	2	TRUE	C53D5.1a	chrI	289232	+	36	1.13	2017	1984
UTGB	GTSSWA200014.03	outron	3	FALSE	C53D5.1a	chrI	289237	+	25	1.126	2012	1979
UTGB	GTSSWA200015.01	outron	1	FALSE	C53D5.5.1	chrI	311222	-	11	1.799	433	418
UTGB	GTSSWA200015.02	outron	2	FALSE	C53D5.5.1	chrI	311161	-	12	0	372	357
UTGB	GTSSWA200015.03	outron	3	FALSE	C53D5.5.1	chrI	310928	-	10	0	139	124
UTGB	GTSSWA200015.04	outron	4	TRUE	C53D5.5.1	chrI	310888	-	13	5.19	99	84
UTGB	GTSSWA200016.01	exon	1	TRUE	Y48G1A.6a	chrI	348400	-	20	0	32	-1
UTGB	GTSSWA200017.01	outron	1	TRUE	Y48G1A.2	chrI	347484	+	15	0	94	27
UTGB	GTSSWA200018.01	outron	1	FALSE	Y48G1A.1	chrI	348484	+	12	0	54	38
UTGB	GTSSWA200018.02	outron	2	TRUE	Y48G1A.1	chrI	348493	+	13	0	45	29
UTGB	GTSSWA200019.01	outron	1	TRUE	R119.1	chrI	365968	-	18	2.356	2063	2057
UTGB	GTSSWA200020.01	outron	1	TRUE	R119.4	chrI	382469	-	10	0	564	563
UTGB	GTSSWA200021.01	outron	1	FALSE	R119.6	chrI	382583	+	44	0.9617	253	248
UTGB	GTSSWA200021.02	outron	2	TRUE	R119.6	chrI	382590	+	283	1.419	246	241
UTGB	GTSSWA200022.01	outron	1	TRUE	C07F11.1	chrI	443658	+	46	4.853	363	344
UTGB	GTSSWA200022.02	outron	2	FALSE	C07F11.1	chrI	443664	+	26	0.8493	357	338
UTGB	GTSSWA200022.03	outron	3	FALSE	C07F11.1	chrI	443677	+	10	0	344	325
UTGB	GTSSWA200022.04	outron	4	FALSE	C07F11.1	chrI	443687	+	27	1.217	334	315
UTGB	GTSSWA200023.01	outron	1	TRUE	W04C9.2	chrI	488508	+	15	0	111	102
UTGB	GTSSWA200024.01	exon	1	TRUE	W04C9.1	chrI	489982	+	54	14.33	72	-1
UTGB	GTSSWA200024.02	exon	2	FALSE	W04C9.1	chrI	490017	+	18	0	37	-1
UTGB	GTSSWA200024.03	exon	3	FALSE	W04C9.1	chrI	490027	+	12	0	27	-1
UTGB	GTSSWA200024.04	exon	4	FALSE	W04C9.1	chrI	490036	+	10	0	18	-1
UTGB	GTSSWA200025.01	outron	1	TRUE	Y65B4BL.4	chrI	506249	-	20	0.7636	33	26
UTGB	GTSSWA200026.01	outron	1	FALSE	Y65B4BL.2	chrI	506411	+	24	10.09	69	63
UTGB	GTSSWA200026.02	outron	2	TRUE	Y65B4BL.2	chrI	506443	+	187	2.439	37	31
UTGB	GTSSWA200026.03	outron	3	FALSE	Y65B4BL.2	chrI	506451	+	12	0	29	23
UTGB	GTSSWA200026.04	outron	4	FALSE	Y65B4BL.2	chrI	506454	+	12	3.298	26	20
UTGB	GTSSWA200027.01	outron	1	FALSE	Y65B4BL.5	chrI	518563	-	27	0	2165	2103
UTGB	GTSSWA200027.02	outron	2	FALSE	Y65B4BL.5	chrI	516612	-	16	2.142	214	152
UTGB	GTSSWA200027.03	outron	3	TRUE	Y65B4BL.5	chrI	516601	-	56	6.301	203	141
UTGB	GTSSWA200027.04	outron	4	FALSE	Y65B4BL.5	chrI	516592	-	38	2.098	194	132
UTGB	GTSSWA200028.01	exon	1	TRUE	Y65B4BL.6a	chrI	521394	-	90	0.8594	41	-1
UTGB	GTSSWA200029.01	outron	1	FALSE	Y65B4BR.4a	chrI	536618	+	14	2.181	523	507
UTGB	GTSSWA200029.02	outron	2	TRUE	Y65B4BR.4a	chrI	536946	+	23	8	195	179
UTGB	GTSSWA200030.01	exon	1	FALSE	Y65B4BR.2	chrI	557446	+	11	1.504	63	-1
UTGB	GTSSWA200030.02	exon	2	TRUE	Y65B4BR.2	chrI	557451	+	69	0	58	-1
UTGB	GTSSWA200031.01	exon	1	FALSE	Y65B4BR.6a	chrI	575122	-	10	0	52	-1
UTGB	GTSSWA200031.02	exon	2	TRUE	Y65B4BR.6a	chrI	575115	-	43	2.43	45	-1
UTGB	GTSSWA200031.03	exon	3	FALSE	Y65B4BR.6a	chrI	575096	-	10	0	26	-1
UTGB	GTSSWA200032.01	outron	1	TRUE	F56A6.1a	chrI	618163	+	69	0.4365	47	34
UTGB	GTSSWA200032.02	outron	2	FALSE	F56A6.1a	chrI	618179	+	11	0	31	18
UTGB	GTSSWA200033.01	exon	1	TRUE	Y65B4A.3	chrI	636878	+	19	19.12	61	-1
UTGB	GTSSWA200034.01	exon	1	TRUE	Y65B4A.7	chrI	647246	-	12	0	17	-1
UTGB	GTSSWA200035.01	outron	1	TRUE	Y65B4A.1	chrI	654096	+	21	3.4	35	27
UTGB	GTSSWA200036.01	exon	1	TRUE	Y65B4A.8.1	chrI	663597	-	23	0.61	44	-1
UTGB	GTSSWA200036.02	exon	2	FALSE	Y65B4A.8.1	chrI	663593	-	10	1.184	40	-1
UTGB	GTSSWA200037.01	exon	1	TRUE	Y65B4A.9	chrI	666887	-	10	0	77	-1
UTGB	GTSSWA200038.01	exon	1	TRUE	Y18H1A.7	chrI	719730	-	13	0	42	-1
UTGB	GTSSWA200039.01	outron	1	TRUE	Y18H1A.6	chrI	720034	+	94	0.9858	47	38
UTGB	GTSSWA200039.02	outron	2	FALSE	Y18H1A.6	chrI	720040	+	23	2.808	41	32
UTGB	GTSSWA200039.03	outron	3	FALSE	Y18H1A.6	chrI	720053	+	10	0	28	19
UTGB	GTSSWA200040.01	exon	1	TRUE	Y18H1A.13	chrI	745518	-	19	2.12	61	-1
UTGB	GTSSWA200040.02	exon	2	FALSE	Y18H1A.13	chrI	745506	-	11	0	49	-1
UTGB	GTSSWA200041.01	exon	1	TRUE	T06A4.3a	chrI	763639	+	11	0	38	-1
UTGB	GTSSWA200042.01	outron	1	FALSE	Y95B8A.8	chrI	853365	+	18	7.328	96	90
UTGB	GTSSWA200042.02	outron	2	FALSE	Y95B8A.8	chrI	853383	+	18	0.8493	78	72
UTGB	GTSSWA200042.03	outron	3	TRUE	Y95B8A.8	chrI	853393	+	37	0.5714	68	62
UTGB	GTSSWA200043.01	exon	1	TRUE	Y95B8A.4	chrI	907466	+	25	0	29	-1
UTGB	GTSSWA200044.01	outron	1	TRUE	Y95B8A.2	chrI	938496	+	73	15.07	131	14
UTGB	GTSSWA200045.01	outron	1	FALSE	Y34D9B.1a	chrI	957387	-	29	2.903	65	36
UTGB	GTSSWA200045.02	outron	2	TRUE	Y34D9B.1a	chrI	957375	-	76	0.4713	53	24
UTGB	GTSSWA200046.01	exon	1	TRUE	F54A5.2	chrI	969367	-	12	0	32	-1
UTGB	GTSSWA200047.01	exon	1	TRUE	F54A5.3a	chrI	973135	-	40	12.36	80	-1
UTGB	GTSSWA200048.01	exon	1	FALSE	C54G6.1a	chrI	1014383	-	17	4.265	73	-1
UTGB	GTSSWA200048.02	exon	2	TRUE	C54G6.1a	chrI	1014359	-	172	1.507	49	-1
UTGB	GTSSWA200049.01	outron	1	TRUE	C54G6.5	chrI	1015198	+	43	2.455	1214	1209
UTGB	GTSSWA200050.01	outron	1	TRUE	Y34D9A.11	chrI	1017687	+	104	1.524	1158	1150
UTGB	GTSSWA200051.01	exon	1	TRUE	Y34D9A.8b	chrI	1053735	-	10	0	87	-1
UTGB	GTSSWA200052.01	outron	1	FALSE	Y34D9A.10	chrI	1067115	-	12	0	243	213
UTGB	GTSSWA200052.02	outron	2	FALSE	Y34D9A.10	chrI	1067105	-	12	0	233	203
UTGB	GTSSWA200052.03	outron	3	FALSE	Y34D9A.10	chrI	1067100	-	11	0	228	198
UTGB	GTSSWA200052.04	outron	4	TRUE	Y34D9A.10	chrI	1067084	-	42	1.222	212	182
UTGB	GTSSWA200053.01	exon	1	TRUE	R06A10.2.1	chrI	1068582	+	24	1.428	416	-1
UTGB	GTSSWA200053.02	exon	2	FALSE	R06A10.2.1	chrI	1068608	+	11	1.593	390	-1
UTGB	GTSSWA200054.01	outron	1	TRUE	R06A10.5	chrI	1088516	+	14	0	611	576
UTGB	GTSSWA200055.01	exon	1	TRUE	ZK993.1	chrI	1128326	+	10	0	35	-1
UTGB	GTSSWA200056.01	outron	1	FALSE	Y48G8AL.14	chrI	1156133	-	13	0	110	110
UTGB	GTSSWA200056.02	outron	2	TRUE	Y48G8AL.14	chrI	1156126	-	22	1.241	103	103
UTGB	GTSSWA200056.03	outron	3	FALSE	Y48G8AL.14	chrI	1156111	-	13	2.696	88	88
UTGB	GTSSWA200057.01	outron	1	TRUE	Y48G8AL.8b	chrI	1156291	+	18	0	308	290
UTGB	GTSSWA200058.01	exon	1	TRUE	Y48G8AL.11	chrI	1175836	-	82	1.705	80	-1
UTGB	GTSSWA200058.02	exon	2	FALSE	Y48G8AL.11	chrI	1175814	-	52	2.641	58	-1
UTGB	GTSSWA200058.03	exon	3	FALSE	Y48G8AL.11	chrI	1175806	-	67	1.497	50	-1
UTGB	GTSSWA200058.04	exon	4	FALSE	Y48G8AL.11	chrI	1175800	-	16	2.623	44	-1
UTGB	GTSSWA200059.01	outron	1	TRUE	Y48G8AL.5	chrI	1190620	+	13	2.084	2580	2540
UTGB	GTSSWA200060.01	exon	1	TRUE	Y48G8AL.12	chrI	1219003	-	152	0.4805	24	-1
UTGB	GTSSWA200060.02	exon	2	FALSE	Y48G8AL.12	chrI	1219000	-	50	0.639	21	-1
UTGB	GTSSWA200061.01	outron	1	TRUE	K12C11.3	chrI	1335346	+	85	13.09	50	47
UTGB	GTSSWA200062.01	outron	1	FALSE	K12C11.2.1	chrI	1340243	+	11	0.7963	461	443
UTGB	GTSSWA200062.02	outron	2	FALSE	K12C11.2.1	chrI	1340271	+	19	0.7465	433	415
UTGB	GTSSWA200062.03	outron	3	TRUE	K12C11.2.1	chrI	1340275	+	35	0.6834	429	411
UTGB	GTSSWA200062.04	outron	4	FALSE	K12C11.2.1	chrI	1340281	+	23	0	423	405
UTGB	GTSSWA200062.05	outron	5	FALSE	K12C11.2.1	chrI	1340309	+	12	6.624	395	377
UTGB	GTSSWA200063.01	outron	1	TRUE	Y92H12BL.4	chrI	1385146	-	11	0	87	75
UTGB	GTSSWA200064.01	outron	1	TRUE	Y92H12BR.4	chrI	1435348	-	18	0	1651	1629
UTGB	GTSSWA200065.01	exon	1	FALSE	F47G6.2	chrI	1471271	+	12	2.637	51	-1
UTGB	GTSSWA200065.02	exon	2	TRUE	F47G6.2	chrI	1471277	+	47	1.897	45	-1
UTGB	GTSSWA200065.03	exon	3	FALSE	F47G6.2	chrI	1471287	+	14	0	35	-1
UTGB	GTSSWA200065.04	exon	4	FALSE	F47G6.2	chrI	1471298	+	16	2.797	24	-1
UTGB	GTSSWA200066.01	outron	1	TRUE	Y92H12A.4	chrI	1511897	+	12	0	2866	2861
UTGB	GTSSWA200067.01	exon	1	FALSE	Y71G12B.20a	chrI	1651386	-	11	0	129	-1
UTGB	GTSSWA200067.02	exon	2	FALSE	Y71G12B.20a	chrI	1651354	-	10	0	97	-1
UTGB	GTSSWA200067.03	exon	3	FALSE	Y71G12B.20a	chrI	1651332	-	10	0	75	-1
UTGB	GTSSWA200067.04	exon	4	TRUE	Y71G12B.20a	chrI	1651321	-	25	0	64	-1
UTGB	GTSSWA200068.01	exon	1	TRUE	Y71G12B.18	chrI	1652902	+	21	0	15	-1
UTGB	GTSSWA200069.01	exon	1	TRUE	Y71G12B.21	chrI	1656720	-	10	0	18	-1
UTGB	GTSSWA200070.01	outron	1	TRUE	Y71G12B.13	chrI	1701975	+	13	0	149	131
UTGB	GTSSWA200071.01	outron	1	TRUE	Y71G12B.11a	chrI	1719379	+	20	0	2219	2214
UTGB	GTSSWA200072.01	exon	1	TRUE	Y71G12B.7	chrI	1791344	+	11	0	1112	-1
UTGB	GTSSWA200073.01	exon	1	TRUE	Y71G12B.4	chrI	1808094	+	72	0.8484	26	-1
UTGB	GTSSWA200073.02	exon	2	FALSE	Y71G12B.4	chrI	1808097	+	58	1.236	23	-1
UTGB	GTSSWA200074.01	exon	1	TRUE	Y71G12B.3	chrI	1811679	+	21	5.951	1277	-1
UTGB	GTSSWA200075.01	exon	1	TRUE	Y71G12B.2	chrI	1816107	+	21	13.66	44	-1
UTGB	GTSSWA200076.01	exon	1	TRUE	Y71G12B.30	chrI	1822945	-	16	0.714	12	-1
UTGB	GTSSWA200077.01	outron	1	FALSE	Y71G12B.1b	chrI	1823328	+	11	0	127	120
UTGB	GTSSWA200077.02	outron	2	TRUE	Y71G12B.1b	chrI	1823337	+	64	0	118	111
UTGB	GTSSWA200077.03	outron	3	FALSE	Y71G12B.1b	chrI	1823349	+	13	0	106	99
UTGB	GTSSWA200077.04	outron	4	FALSE	Y71G12B.1b	chrI	1823366	+	18	0	89	82
UTGB	GTSSWA200077.05	outron	5	FALSE	Y71G12B.1b	chrI	1823431	+	14	0	24	17
UTGB	GTSSWA200078.01	outron	1	TRUE	C53H9.2a	chrI	1832740	+	18	11.76	158	158
UTGB	GTSSWA200078.02	outron	2	FALSE	C53H9.2a	chrI	1832771	+	11	0	127	127
UTGB	GTSSWA200078.03	outron	3	FALSE	C53H9.2a	chrI	1832782	+	14	0	116	116
UTGB	GTSSWA200079.01	exon	1	FALSE	M01D7.7a	chrI	1835683	+	38	7.949	254	-1
UTGB	GTSSWA200079.02	exon	2	FALSE	M01D7.7a	chrI	1835712	+	11	0	225	-1
UTGB	GTSSWA200079.03	exon	3	TRUE	M01D7.7a	chrI	1835718	+	42	1.181	219	-1
UTGB	GTSSWA200079.04	exon	4	FALSE	M01D7.7a	chrI	1835745	+	18	2.54	192	-1
UTGB	GTSSWA200080.01	outron	1	TRUE	M01D7.6.3	chrI	1841828	+	29	4.036	633	618
UTGB	GTSSWA200080.02	outron	2	FALSE	M01D7.6.3	chrI	1842126	+	13	0	335	320
UTGB	GTSSWA200080.03	outron	3	FALSE	M01D7.6.3	chrI	1842156	+	27	5.159	305	290
UTGB	GTSSWA200081.01	exon	1	FALSE	M01D7.5	chrI	1843383	+	28	0.7315	25	-1
UTGB	GTSSWA200081.02	exon	2	TRUE	M01D7.5	chrI	1843387	+	100	0.9237	21	-1
UTGB	GTSSWA200082.01	outron	1	TRUE	M01D7.2	chrI	1873784	-	11	0	1503	1476
UTGB	GTSSWA200083.01	exon	1	FALSE	Y71G12A.3	chrI	1874045	+	18	0	133	-1
UTGB	GTSSWA200083.02	exon	2	FALSE	Y71G12A.3	chrI	1874057	+	10	11.04	121	-1
UTGB	GTSSWA200083.03	exon	3	FALSE	Y71G12A.3	chrI	1874096	+	70	1.655	82	-1
UTGB	GTSSWA200083.04	exon	4	FALSE	Y71G12A.3	chrI	1874120	+	54	1.653	58	-1
UTGB	GTSSWA200083.05	exon	5	FALSE	Y71G12A.3	chrI	1874126	+	20	0.6444	52	-1
UTGB	GTSSWA200083.06	exon	6	TRUE	Y71G12A.3	chrI	1874134	+	107	1.25	44	-1
UTGB	GTSSWA200083.07	exon	7	FALSE	Y71G12A.3	chrI	1874137	+	54	0.9168	41	-1
UTGB	GTSSWA200084.01	outron	1	FALSE	Y71G12A.2b	chrI	1895160	+	12	0	76	71
UTGB	GTSSWA200084.02	outron	2	TRUE	Y71G12A.2b	chrI	1895188	+	25	0	48	43
UTGB	GTSSWA200084.03	outron	3	FALSE	Y71G12A.2b	chrI	1895202	+	15	0	34	29
UTGB	GTSSWA200085.01	exon	1	TRUE	Y51F10.7	chrI	1913936	-	4513	6.531	28	-1
UTGB	GTSSWA200086.01	outron	1	TRUE	Y51F10.4a	chrI	1932286	+	10	3.397	68	67
UTGB	GTSSWA200087.01	outron	1	TRUE	Y51F10.10	chrI	1958529	-	19	1.043	73	25
UTGB	GTSSWA200088.01	exon	1	FALSE	Y51F10.2	chrI	1978008	+	26	0	46	-1
UTGB	GTSSWA200088.02	exon	2	TRUE	Y51F10.2	chrI	1978019	+	305	1.747	35	-1
UTGB	GTSSWA200088.03	exon	3	FALSE	Y51F10.2	chrI	1978031	+	59	0.8462	23	-1
UTGB	GTSSWA200088.04	exon	4	FALSE	Y51F10.2	chrI	1978035	+	19	1.317	19	-1
UTGB	GTSSWA200089.01	outron	1	TRUE	Y20F4.3	chrI	2010569	-	10	0	87	71
UTGB	GTSSWA200090.01	outron	1	TRUE	Y20F4.4	chrI	2045073	-	10	0	1290	1265
UTGB	GTSSWA200091.01	exon	1	TRUE	Y20F4.5	chrI	2055947	-	10	0	2243	-1
UTGB	GTSSWA200092.01	outron	1	FALSE	Y37E3.1	chrI	2064035	-	38	10.8	90	71
UTGB	GTSSWA200092.02	outron	2	TRUE	Y37E3.1	chrI	2064000	-	205	7.662	55	36
UTGB	GTSSWA200093.01	outron	1	FALSE	Y37E3.7.1	chrI	2069652	-	13	0	136	74
UTGB	GTSSWA200093.02	exon	2	TRUE	Y37E3.7.1	chrI	2069528	-	411	5.251	12	-1
UTGB	GTSSWA200094.01	outron	1	FALSE	Y37E3.8a.1	chrI	2070851	-	16	3.111	244	241
UTGB	GTSSWA200094.02	outron	2	FALSE	Y37E3.8a.1	chrI	2070834	-	12	0	227	224
UTGB	GTSSWA200094.03	outron	3	TRUE	Y37E3.8a.1	chrI	2070829	-	58	0.9725	222	219
UTGB	GTSSWA200094.04	outron	4	FALSE	Y37E3.8a.1	chrI	2070822	-	17	1.154	215	212
UTGB	GTSSWA200094.05	outron	5	FALSE	Y37E3.8a.1	chrI	2070816	-	10	0	209	206
UTGB	GTSSWA200094.06	outron	6	FALSE	Y37E3.8a.1	chrI	2070810	-	23	0	203	200
UTGB	GTSSWA200094.07	outron	7	FALSE	Y37E3.8a.1	chrI	2070786	-	11	1.578	179	176
UTGB	GTSSWA200095.01	outron	1	FALSE	Y37E3.11a	chrI	2076111	+	11	8.934	2859	2852
UTGB	GTSSWA200095.02	outron	2	TRUE	Y37E3.11a	chrI	2076203	+	26	14.3	2767	2760
UTGB	GTSSWA200095.03	outron	3	FALSE	Y37E3.11a	chrI	2076956	+	10	0	2014	2007
UTGB	GTSSWA200095.04	outron	4	FALSE	Y37E3.11a	chrI	2078947	+	16	0	23	16
UTGB	GTSSWA200096.01	exon	1	FALSE	W03F11.1	chrI	2222316	-	31	0	21	-1
UTGB	GTSSWA200096.02	exon	2	TRUE	W03F11.1	chrI	2222314	-	204	0.5412	19	-1
UTGB	GTSSWA200096.03	exon	3	FALSE	W03F11.1	chrI	2222310	-	91	0.4535	15	-1
UTGB	GTSSWA200097.01	exon	1	FALSE	W03F11.3	chrI	2234944	-	31	0	96	-1
UTGB	GTSSWA200097.02	exon	2	TRUE	W03F11.3	chrI	2234912	-	33	1.744	64	-1
UTGB	GTSSWA200098.01	outron	1	TRUE	Y39G10AL.3.2	chrI	2291130	-	15	0	1381	1375
UTGB	GTSSWA200099.01	outron	1	TRUE	Y39G10AR.12a	chrI	2304413	-	10	3.118	19	18
UTGB	GTSSWA200100.01	outron	1	TRUE	Y39G10AR.13.1	chrI	2306806	-	18	0	18	14
UTGB	GTSSWA200101.01	outron	1	TRUE	Y39G10AR.9	chrI	2306959	+	50	0	452	446
UTGB	GTSSWA200101.02	outron	2	FALSE	Y39G10AR.9	chrI	2307370	+	12	0	41	35
UTGB	GTSSWA200102.01	outron	1	TRUE	Y39G10AR.8	chrI	2313181	+	22	2.812	131	91
UTGB	GTSSWA200102.02	outron	2	FALSE	Y39G10AR.8	chrI	2313214	+	14	0	98	58
UTGB	GTSSWA200103.01	outron	1	FALSE	Y39G10AR.7	chrI	2316174	+	25	0.7804	136	134
UTGB	GTSSWA200103.02	outron	2	TRUE	Y39G10AR.7	chrI	2316181	+	208	0	129	127
UTGB	GTSSWA200103.03	outron	3	FALSE	Y39G10AR.7	chrI	2316187	+	28	2.724	123	121
UTGB	GTSSWA200103.04	outron	4	FALSE	Y39G10AR.7	chrI	2316197	+	12	1.926	113	111
UTGB	GTSSWA200103.05	outron	5	FALSE	Y39G10AR.7	chrI	2316206	+	21	0	104	102
UTGB	GTSSWA200104.01	outron	1	TRUE	Y39G10AR.14.1	chrI	2321909	-	16	0	97	90
UTGB	GTSSWA200105.01	exon	1	FALSE	Y39G10AR.16	chrI	2332636	-	11	1.194	34	-1
UTGB	GTSSWA200105.02	exon	2	TRUE	Y39G10AR.16	chrI	2332629	-	22	1.982	27	-1
UTGB	GTSSWA200106.01	exon	1	FALSE	Y39G10AR.6	chrI	2333319	+	10	0.8493	24	-1
UTGB	GTSSWA200106.02	exon	2	TRUE	Y39G10AR.6	chrI	2333327	+	100	0.8672	16	-1
UTGB	GTSSWA200107.01	outron	1	FALSE	F23C8.5.1	chrI	2420407	-	11	0	59	52
UTGB	GTSSWA200107.02	outron	2	FALSE	F23C8.5.1	chrI	2420399	-	10	2.548	51	44
UTGB	GTSSWA200107.03	outron	3	TRUE	F23C8.5.1	chrI	2420394	-	167	0.4967	46	39
UTGB	GTSSWA200107.04	outron	4	FALSE	F23C8.5.1	chrI	2420391	-	76	2.096	43	36
UTGB	GTSSWA200107.05	outron	5	FALSE	F23C8.5.1	chrI	2420384	-	49	0.5609	36	29
UTGB	GTSSWA200107.06	outron	6	FALSE	F23C8.5.1	chrI	2420380	-	48	0.5283	32	25
UTGB	GTSSWA200108.01	outron	1	TRUE	F23C8.6	chrI	2421823	-	49	13.17	124	88
UTGB	GTSSWA200109.01	outron	1	TRUE	F23C8.7	chrI	2425183	-	11	3.759	108	85
UTGB	GTSSWA200110.01	outron	1	TRUE	F23C8.4	chrI	2433789	+	13	0	223	216
UTGB	GTSSWA200111.01	outron	1	TRUE	Y74C10AR.1	chrI	2485712	+	10	0	158	156
UTGB	GTSSWA200112.01	outron	1	TRUE	Y23H5B.6	chrI	2489954	+	10	0	31	23
UTGB	GTSSWA200113.01	exon	1	TRUE	Y23H5B.7a	chrI	2514241	-	19	1.644	529	-1
UTGB	GTSSWA200114.01	exon	1	TRUE	C55C2.4	chrI	2558161	+	15	0	140	-1
UTGB	GTSSWA200115.01	exon	1	TRUE	C55C2.2	chrI	2562622	+	17	0	47	-1
UTGB	GTSSWA200116.01	outron	1	TRUE	K07A3.1.1	chrI	2587340	-	39	1.421	1216	1214
UTGB	GTSSWA200117.01	exon	1	TRUE	Y23H5A.4	chrI	2617519	+	28	0.6318	42	-1
UTGB	GTSSWA200118.01	outron	1	TRUE	Y23H5A.3	chrI	2620574	+	16	1.935	86	83
UTGB	GTSSWA200119.01	outron	1	TRUE	F40E3.2	chrI	2642511	+	22	2.109	230	214
UTGB	GTSSWA200120.01	outron	1	TRUE	F32B5.7.1	chrI	2682925	-	14	0	195	126
UTGB	GTSSWA200121.01	exon	1	FALSE	F32B5.8	chrI	2689470	-	41	0	53	-1
UTGB	GTSSWA200121.02	exon	2	FALSE	F32B5.8	chrI	2689468	-	79	0.4918	51	-1
UTGB	GTSSWA200121.03	exon	3	FALSE	F32B5.8	chrI	2689465	-	99	0.4344	48	-1
UTGB	GTSSWA200121.04	exon	4	FALSE	F32B5.8	chrI	2689454	-	27	0.6086	37	-1
UTGB	GTSSWA200121.05	exon	5	TRUE	F32B5.8	chrI	2689444	-	584	0.3859	27	-1
UTGB	GTSSWA200121.06	exon	6	FALSE	F32B5.8	chrI	2689440	-	197	0.4227	23	-1
UTGB	GTSSWA200121.07	exon	7	FALSE	F32B5.8	chrI	2689437	-	117	0.8634	20	-1
UTGB	GTSSWA200121.08	exon	8	FALSE	F32B5.8	chrI	2689434	-	21	1.088	17	-1
UTGB	GTSSWA200121.09	exon	9	FALSE	F32B5.8	chrI	2689427	-	12	4.794	10	-1
UTGB	GTSSWA200121.10	exon	10	FALSE	F32B5.8	chrI	2689418	-	47	1.987	1	-1
UTGB	GTSSWA200122.01	exon	1	TRUE	F32B5.4	chrI	2692078	+	42	0	32	-1
UTGB	GTSSWA200123.01	outron	1	TRUE	Y71F9B.3.1	chrI	2728761	+	46	0	1250	1244
UTGB	GTSSWA200123.02	outron	2	FALSE	Y71F9B.3.1	chrI	2728777	+	18	1.874	1234	1228
UTGB	GTSSWA200123.03	outron	3	FALSE	Y71F9B.3.1	chrI	2728788	+	17	0	1223	1217
UTGB	GTSSWA200123.04	outron	4	FALSE	Y71F9B.3.1	chrI	2728931	+	15	3.331	1080	1074
UTGB	GTSSWA200123.05	outron	5	FALSE	Y71F9B.3.1	chrI	2728941	+	10	2.565	1070	1064
UTGB	GTSSWA200124.01	exon	1	TRUE	Y71F9B.15	chrI	2784310	-	15	2.024	37	-1
UTGB	GTSSWA200124.02	exon	2	FALSE	Y71F9B.15	chrI	2784286	-	13	0	13	-1
UTGB	GTSSWA200125.01	outron	1	TRUE	W03D8.9	chrI	2786069	-	12	0	271	214
UTGB	GTSSWA200126.01	outron	1	TRUE	W03D8.6	chrI	2800966	+	34	1.611	1857	1844
UTGB	GTSSWA200127.01	outron	1	TRUE	W03D8.3	chrI	2822135	-	10	2.368	48	16
UTGB	GTSSWA200128.01	exon	1	TRUE	W10C8.4a	chrI	2853859	-	92	3.428	61	-1
UTGB	GTSSWA200128.02	exon	2	FALSE	W10C8.4a	chrI	2853841	-	18	0	43	-1
UTGB	GTSSWA200128.03	exon	3	FALSE	W10C8.4a	chrI	2853838	-	17	5.744	40	-1
UTGB	GTSSWA200128.04	exon	4	FALSE	W10C8.4a	chrI	2853826	-	17	1.501	28	-1
UTGB	GTSSWA200129.01	exon	1	FALSE	W10C8.6	chrI	2859888	-	18	1.25	48	-1
UTGB	GTSSWA200129.02	exon	2	TRUE	W10C8.6	chrI	2859855	-	162	3.618	15	-1
UTGB	GTSSWA200130.01	outron	1	TRUE	Y71F9AL.12	chrI	2875370	-	12	1.926	79	79
UTGB	GTSSWA200131.01	outron	1	FALSE	Y71F9AL.13a.1	chrI	2877623	-	27	0	1319	1313
UTGB	GTSSWA200131.02	outron	2	FALSE	Y71F9AL.13a.1	chrI	2877332	-	10	0	1028	1022
UTGB	GTSSWA200131.03	outron	3	TRUE	Y71F9AL.13a.1	chrI	2876454	-	435	14.18	150	144
UTGB	GTSSWA200132.01	outron	1	TRUE	Y71F9AL.9.1	chrI	2876629	+	13	1.015	308	304
UTGB	GTSSWA200133.01	outron	1	FALSE	Y71F9AL.8	chrI	2878088	+	16	3.232	491	491
UTGB	GTSSWA200133.02	outron	2	FALSE	Y71F9AL.8	chrI	2878103	+	16	1.379	476	476
UTGB	GTSSWA200133.03	outron	3	TRUE	Y71F9AL.8	chrI	2878157	+	55	5.999	422	422
UTGB	GTSSWA200133.04	outron	4	FALSE	Y71F9AL.8	chrI	2878170	+	24	11.82	409	409
UTGB	GTSSWA200133.05	outron	5	FALSE	Y71F9AL.8	chrI	2878229	+	31	15.44	350	350
UTGB	GTSSWA200133.06	outron	6	FALSE	Y71F9AL.8	chrI	2878315	+	11	1.626	264	264
UTGB	GTSSWA200134.01	outron	1	FALSE	Y71F9AL.14.2	chrI	2883832	-	13	1.015	390	390
UTGB	GTSSWA200134.02	outron	2	FALSE	Y71F9AL.14.2	chrI	2883819	-	13	1.73	377	377
UTGB	GTSSWA200134.03	outron	3	FALSE	Y71F9AL.14.2	chrI	2883815	-	11	1.876	373	373
UTGB	GTSSWA200134.04	outron	4	TRUE	Y71F9AL.14.2	chrI	2883785	-	20	10.39	343	343
UTGB	GTSSWA200135.01	exon	1	TRUE	Y71F9AL.7	chrI	2887785	+	19	0	16	-1
UTGB	GTSSWA200136.01	outron	1	TRUE	Y71F9AL.18.1	chrI	2925543	-	23	5.191	847	828
UTGB	GTSSWA200136.02	outron	2	FALSE	Y71F9AL.18.1	chrI	2924815	-	10	0	119	100
UTGB	GTSSWA200137.01	outron	1	FALSE	Y71F9AL.1	chrI	2924166	+	28	0	1080	1075
UTGB	GTSSWA200137.02	outron	2	TRUE	Y71F9AL.1	chrI	2925229	+	43	0	17	12
UTGB	GTSSWA200138.01	outron	1	FALSE	Y71F9AM.6.1	chrI	2928251	+	17	3.96	147	145
UTGB	GTSSWA200138.02	outron	2	FALSE	Y71F9AM.6.1	chrI	2928262	+	26	2.702	136	134
UTGB	GTSSWA200138.03	outron	3	FALSE	Y71F9AM.6.1	chrI	2928281	+	62	3.382	117	115
UTGB	GTSSWA200138.04	outron	4	FALSE	Y71F9AM.6.1	chrI	2928293	+	21	1.89	105	103
UTGB	GTSSWA200138.05	outron	5	TRUE	Y71F9AM.6.1	chrI	2928348	+	279	10.58	50	48
UTGB	GTSSWA200139.01	outron	1	FALSE	Y71F9AM.5b	chrI	2929775	+	35	2.438	66	59
UTGB	GTSSWA200139.02	outron	2	FALSE	Y71F9AM.5b	chrI	2929780	+	45	0.4981	61	54
UTGB	GTSSWA200139.03	outron	3	FALSE	Y71F9AM.5b	chrI	2929784	+	67	0.5057	57	50
UTGB	GTSSWA200139.04	outron	4	TRUE	Y71F9AM.5b	chrI	2929792	+	136	0.7504	49	42
UTGB	GTSSWA200139.05	outron	5	FALSE	Y71F9AM.5b	chrI	2929795	+	55	0.5416	46	39
UTGB	GTSSWA200139.06	outron	6	FALSE	Y71F9AM.5b	chrI	2929814	+	30	1.841	27	20
UTGB	GTSSWA200140.01	outron	1	FALSE	Y54E10BL.4	chrI	2996402	+	43	1.636	109	67
UTGB	GTSSWA200140.02	outron	2	FALSE	Y54E10BL.4	chrI	2996422	+	17	1.31	89	47
UTGB	GTSSWA200140.03	outron	3	FALSE	Y54E10BL.4	chrI	2996427	+	12	1.656	84	42
UTGB	GTSSWA200140.04	outron	4	TRUE	Y54E10BL.4	chrI	2996441	+	97	0.9073	70	28
UTGB	GTSSWA200140.05	outron	5	FALSE	Y54E10BL.4	chrI	2996450	+	13	0	61	19
UTGB	GTSSWA200140.06	exon	6	FALSE	Y54E10BL.4	chrI	2996489	+	30	1.979	22	-1
UTGB	GTSSWA200141.01	exon	1	FALSE	Y54E10BR.2.1	chrI	3032938	+	33	1.1	69	-1
UTGB	GTSSWA200141.02	exon	2	TRUE	Y54E10BR.2.1	chrI	3032988	+	100	1.722	19	-1
UTGB	GTSSWA200141.03	exon	3	FALSE	Y54E10BR.2.1	chrI	3032994	+	11	3.633	13	-1
UTGB	GTSSWA200142.01	exon	1	TRUE	Y54E10BR.8	chrI	3059147	-	115	6.925	74	-1
UTGB	GTSSWA200142.02	exon	2	FALSE	Y54E10BR.8	chrI	3059117	-	27	14.56	44	-1
UTGB	GTSSWA200143.01	exon	1	FALSE	Y54E10BR.1	chrI	3059213	+	50	0.6267	102	-1
UTGB	GTSSWA200143.02	exon	2	FALSE	Y54E10BR.1	chrI	3059224	+	91	1.77	91	-1
UTGB	GTSSWA200143.03	exon	3	FALSE	Y54E10BR.1	chrI	3059231	+	134	0.9235	84	-1
UTGB	GTSSWA200143.04	exon	4	TRUE	Y54E10BR.1	chrI	3059236	+	251	0.9312	79	-1
UTGB	GTSSWA200143.05	exon	5	FALSE	Y54E10BR.1	chrI	3059242	+	10	0	73	-1
UTGB	GTSSWA200143.06	exon	6	FALSE	Y54E10BR.1	chrI	3059253	+	131	1.565	62	-1
UTGB	GTSSWA200144.01	outron	1	FALSE	M01B12.3	chrI	3071334	-	10	10.23	1192	1186
UTGB	GTSSWA200144.02	outron	2	TRUE	M01B12.3	chrI	3071283	-	22	14.27	1141	1135
UTGB	GTSSWA200145.01	outron	1	FALSE	M01B12.4a.1	chrI	3085467	-	14	0	628	591
UTGB	GTSSWA200145.02	outron	2	FALSE	M01B12.4a.1	chrI	3085456	-	13	2.586	617	580
UTGB	GTSSWA200145.03	outron	3	FALSE	M01B12.4a.1	chrI	3085452	-	10	2.432	613	576
UTGB	GTSSWA200145.04	outron	4	FALSE	M01B12.4a.1	chrI	3085429	-	12	12.57	590	553
UTGB	GTSSWA200145.05	outron	5	TRUE	M01B12.4a.1	chrI	3085424	-	38	1.115	585	548
UTGB	GTSSWA200145.06	outron	6	FALSE	M01B12.4a.1	chrI	3085417	-	10	2.837	578	541
UTGB	GTSSWA200145.07	outron	7	FALSE	M01B12.4a.1	chrI	3085413	-	25	0.7387	574	537
UTGB	GTSSWA200145.08	outron	8	FALSE	M01B12.4a.1	chrI	3085407	-	33	1.136	568	531
UTGB	GTSSWA200145.09	outron	9	FALSE	M01B12.4a.1	chrI	3085394	-	31	5.217	555	518
UTGB	GTSSWA200146.01	outron	1	TRUE	C45E1.1b	chrI	3101950	+	45	3.203	2419	2414
UTGB	GTSSWA200146.02	outron	2	FALSE	C45E1.1b	chrI	3101961	+	12	0	2408	2403
UTGB	GTSSWA200147.01	exon	1	FALSE	K09H9.3	chrI	3137186	+	44	2.11	24	-1
UTGB	GTSSWA200147.02	exon	2	TRUE	K09H9.3	chrI	3137194	+	385	1.627	16	-1
UTGB	GTSSWA200148.01	exon	1	TRUE	K09H9.8	chrI	3140602	-	26	0	33	-1
UTGB	GTSSWA200148.02	exon	2	FALSE	K09H9.8	chrI	3140577	-	25	0	8	-1
UTGB	GTSSWA200149.01	exon	1	FALSE	K09H9.5	chrI	3143187	-	29	0.5333	17	-1
UTGB	GTSSWA200149.02	exon	2	TRUE	K09H9.5	chrI	3143176	-	39	0.4934	6	-1
UTGB	GTSSWA200150.01	outron	1	TRUE	K09H9.6	chrI	3147823	-	24	0	37	28
UTGB	GTSSWA200151.01	outron	1	FALSE	K09H9.2.1	chrI	3147958	+	12	0	60	57
UTGB	GTSSWA200151.02	outron	2	TRUE	K09H9.2.1	chrI	3147990	+	19	0	28	25
UTGB	GTSSWA200151.03	outron	3	FALSE	K09H9.2.1	chrI	3147999	+	16	0	19	16
UTGB	GTSSWA200152.01	outron	1	FALSE	K09H9.7	chrI	3152094	-	16	1.555	113	96
UTGB	GTSSWA200152.02	outron	2	TRUE	K09H9.7	chrI	3152090	-	54	0.9054	109	92
UTGB	GTSSWA200153.01	exon	1	TRUE	K09H9.1	chrI	3152555	+	167	0.4287	281	-1
UTGB	GTSSWA200154.01	exon	1	TRUE	Y54E10A.9a	chrI	3162290	-	30	1.365	5	-1
UTGB	GTSSWA200155.01	outron	1	TRUE	Y54E10A.11	chrI	3192762	-	13	0	64	20
UTGB	GTSSWA200156.01	outron	1	TRUE	Y54E10A.12	chrI	3198921	-	10	0	88	81
UTGB	GTSSWA200157.01	outron	1	FALSE	Y54E10A.17.1	chrI	3206721	+	11	1.901	84	81
UTGB	GTSSWA200157.02	outron	2	TRUE	Y54E10A.17.1	chrI	3206773	+	34	0.8867	32	29
UTGB	GTSSWA200158.01	exon	1	FALSE	Y54E10A.15	chrI	3228057	-	22	0	88	-1
UTGB	GTSSWA200158.02	exon	2	FALSE	Y54E10A.15	chrI	3228048	-	10	1.184	79	-1
UTGB	GTSSWA200158.03	exon	3	FALSE	Y54E10A.15	chrI	3228043	-	44	0	74	-1
UTGB	GTSSWA200158.04	exon	4	FALSE	Y54E10A.15	chrI	3228036	-	10	2.968	67	-1
UTGB	GTSSWA200158.05	exon	5	FALSE	Y54E10A.15	chrI	3228027	-	36	0.9223	58	-1
UTGB	GTSSWA200158.06	exon	6	TRUE	Y54E10A.15	chrI	3228023	-	50	0.4918	54	-1
UTGB	GTSSWA200159.01	outron	1	TRUE	Y44E3B.1b.1	chrI	3266721	-	55	6.002	865	864
UTGB	GTSSWA200159.02	outron	2	FALSE	Y44E3B.1b.1	chrI	3266701	-	27	0	845	844
UTGB	GTSSWA200160.01	exon	1	TRUE	W01B11.2	chrI	3287359	+	10	0	121	-1
UTGB	GTSSWA200161.01	outron	1	TRUE	W01B11.6a.1	chrI	3297097	-	64	0	2748	2739
UTGB	GTSSWA200161.02	outron	2	FALSE	W01B11.6a.1	chrI	3297052	-	17	0	2703	2694
UTGB	GTSSWA200162.01	outron	1	FALSE	Y44E3A.3	chrI	3319973	-	10	3.397	1396	1387
UTGB	GTSSWA200162.02	outron	2	TRUE	Y44E3A.3	chrI	3319068	-	10	1.699	491	482
UTGB	GTSSWA200163.01	outron	1	TRUE	W05F2.6	chrI	3368806	+	12	0	55	46
UTGB	GTSSWA200164.01	outron	1	TRUE	W05F2.4a	chrI	3405682	-	10	0	2869	2816
UTGB	GTSSWA200165.01	exon	1	TRUE	K03E5.2a	chrI	3419639	+	103	2.442	41	-1
UTGB	GTSSWA200166.01	exon	1	TRUE	Y47G6A.13	chrI	3442232	-	36	0	42	-1
UTGB	GTSSWA200167.01	exon	1	FALSE	Y47G6A.15	chrI	3476314	-	66	0.4566	21	-1
UTGB	GTSSWA200167.02	exon	2	TRUE	Y47G6A.15	chrI	3476312	-	716	0.3497	19	-1
UTGB	GTSSWA200167.03	exon	3	FALSE	Y47G6A.15	chrI	3476310	-	24	2.397	17	-1
UTGB	GTSSWA200168.01	outron	1	TRUE	Y47G6A.7a.1	chrI	3502874	+	14	0.6969	54	30
UTGB	GTSSWA200169.01	exon	1	FALSE	Y47G6A.6	chrI	3516480	+	60	0.9648	74	-1
UTGB	GTSSWA200169.02	exon	2	FALSE	Y47G6A.6	chrI	3516484	+	26	1.162	70	-1
UTGB	GTSSWA200169.03	exon	3	FALSE	Y47G6A.6	chrI	3516499	+	112	0	55	-1
UTGB	GTSSWA200169.04	exon	4	TRUE	Y47G6A.6	chrI	3516515	+	180	4.41	39	-1
UTGB	GTSSWA200170.01	exon	1	TRUE	Y47G6A.19b	chrI	3529907	-	17	1.867	62	-1
UTGB	GTSSWA200171.01	exon	1	TRUE	Y47G6A.4	chrI	3547095	+	11	1.593	35	-1
UTGB	GTSSWA200172.01	outron	1	FALSE	Y47G6A.22	chrI	3562910	-	12	1.539	63	56
UTGB	GTSSWA200172.02	outron	2	TRUE	Y47G6A.22	chrI	3562895	-	52	0	48	41
UTGB	GTSSWA200173.01	outron	1	FALSE	Y47G6A.33	chrI	3564029	+	82	7.725	61	16
UTGB	GTSSWA200173.02	exon	2	FALSE	Y47G6A.33	chrI	3564058	+	25	2.77	32	-1
UTGB	GTSSWA200173.03	exon	3	FALSE	Y47G6A.33	chrI	3564064	+	23	0.8487	26	-1
UTGB	GTSSWA200173.04	exon	4	TRUE	Y47G6A.33	chrI	3564066	+	4420	0.3467	24	-1
UTGB	GTSSWA200173.05	exon	5	FALSE	Y47G6A.33	chrI	3564069	+	1042	0.4393	21	-1
UTGB	GTSSWA200173.06	exon	6	FALSE	Y47G6A.33	chrI	3564072	+	205	0.4075	18	-1
UTGB	GTSSWA200174.01	exon	1	TRUE	Y47G6A.3	chrI	3601293	+	49	0.468	729	-1
UTGB	GTSSWA200175.01	outron	1	FALSE	Y47G6A.25	chrI	3608344	-	16	2.548	62	33
UTGB	GTSSWA200175.02	outron	2	FALSE	Y47G6A.25	chrI	3608342	-	92	0.8586	60	31
UTGB	GTSSWA200175.03	outron	3	FALSE	Y47G6A.25	chrI	3608335	-	90	1.871	53	24
UTGB	GTSSWA200175.04	outron	4	TRUE	Y47G6A.25	chrI	3608329	-	462	3.489	47	18
UTGB	GTSSWA200175.05	exon	5	FALSE	Y47G6A.25	chrI	3608295	-	74	1.224	13	-1
UTGB	GTSSWA200175.06	exon	6	FALSE	Y47G6A.25	chrI	3608285	-	13	0.8987	3	-1
UTGB	GTSSWA200176.01	exon	1	TRUE	Y47G6A.26	chrI	3619683	-	17	0.6392	44	-1
UTGB	GTSSWA200177.01	outron	1	FALSE	D1037.3.1	chrI	3683170	-	11	19.54	2268	2240
UTGB	GTSSWA200177.02	outron	2	TRUE	D1037.3.1	chrI	3681967	-	33	0	1065	1037
UTGB	GTSSWA200177.03	outron	3	FALSE	D1037.3.1	chrI	3681886	-	22	0	984	956
UTGB	GTSSWA200177.04	outron	4	FALSE	D1037.3.1	chrI	3680956	-	17	0.6929	54	26
UTGB	GTSSWA200177.05	outron	5	FALSE	D1037.3.1	chrI	3680946	-	21	0	44	16
UTGB	GTSSWA200178.01	outron	1	TRUE	D1037.4	chrI	3684115	-	98	1.928	53	26
UTGB	GTSSWA200178.02	outron	2	FALSE	D1037.4	chrI	3684107	-	10	0	45	18
UTGB	GTSSWA200179.01	exon	1	TRUE	D1037.5	chrI	3694024	-	20	0	7	-1
UTGB	GTSSWA200180.01	outron	1	TRUE	H26D21.2	chrI	3697620	-	12	0	82	68
UTGB	GTSSWA200181.01	outron	1	FALSE	T12F5.3.1	chrI	3726834	+	23	2.064	229	195
UTGB	GTSSWA200181.02	outron	2	FALSE	T12F5.3.1	chrI	3726837	+	72	0.5283	226	192
UTGB	GTSSWA200181.03	outron	3	FALSE	T12F5.3.1	chrI	3726841	+	21	1.642	222	188
UTGB	GTSSWA200181.04	outron	4	TRUE	T12F5.3.1	chrI	3726842	+	109	0.8535	221	187
UTGB	GTSSWA200181.05	outron	5	FALSE	T12F5.3.1	chrI	3726859	+	41	0.5953	204	170
UTGB	GTSSWA200181.06	outron	6	FALSE	T12F5.3.1	chrI	3726884	+	43	13.06	179	145
UTGB	GTSSWA200181.07	outron	7	FALSE	T12F5.3.1	chrI	3726914	+	29	1.869	149	115
UTGB	GTSSWA200182.01	exon	1	TRUE	T12F5.5a	chrI	3741252	-	17	2.594	915	-1
UTGB	GTSSWA200182.02	exon	2	FALSE	T12F5.5a	chrI	3740430	-	13	0	93	-1
UTGB	GTSSWA200182.03	exon	3	FALSE	T12F5.5a	chrI	3740422	-	15	0	85	-1
UTGB	GTSSWA200183.01	outron	1	TRUE	ZK770.3.1	chrI	3759075	-	10	0	81	33
UTGB	GTSSWA200184.01	exon	1	FALSE	C32E8.4.1	chrI	3783884	+	13	0	60	-1
UTGB	GTSSWA200184.02	exon	2	TRUE	C32E8.4.1	chrI	3783897	+	95	1.708	47	-1
UTGB	GTSSWA200185.01	outron	1	TRUE	C32E8.2a.1	chrI	3787874	+	27	12.46	170	164
UTGB	GTSSWA200186.01	outron	1	TRUE	C32E8.11	chrI	3818910	-	15	0	2111	2098
UTGB	GTSSWA200187.01	outron	1	TRUE	F53F10.5.1	chrI	3817956	+	18	0	125	120
UTGB	GTSSWA200187.02	outron	2	FALSE	F53F10.5.1	chrI	3817978	+	10	0	103	98
UTGB	GTSSWA200188.01	outron	1	TRUE	F53F10.4	chrI	3822944	+	16	0	2009	2005
UTGB	GTSSWA200189.01	outron	1	TRUE	F53F10.2b.2	chrI	3829531	+	17	1.629	2717	1833
UTGB	GTSSWA200190.01	exon	1	TRUE	F53F10.1	chrI	3837786	-	67	1.538	35	-1
UTGB	GTSSWA200191.01	outron	1	TRUE	T03F1.9	chrI	3866546	-	42	0	606	605
UTGB	GTSSWA200192.01	outron	1	TRUE	T03F1.3	chrI	3867431	+	16	2.333	123	119
UTGB	GTSSWA200193.01	exon	1	TRUE	T03F1.10	chrI	3873418	-	185	1.178	19	-1
UTGB	GTSSWA200194.01	outron	1	FALSE	C50F2.3	chrI	3875748	+	21	4.15	1320	1317
UTGB	GTSSWA200194.02	outron	2	FALSE	C50F2.3	chrI	3875754	+	19	1.116	1314	1311
UTGB	GTSSWA200194.03	outron	3	FALSE	C50F2.3	chrI	3875759	+	44	1.356	1309	1306
UTGB	GTSSWA200194.04	outron	4	TRUE	C50F2.3	chrI	3875770	+	136	4.611	1298	1295
UTGB	GTSSWA200194.05	outron	5	FALSE	C50F2.3	chrI	3875826	+	11	4.796	1242	1239
UTGB	GTSSWA200194.06	outron	6	FALSE	C50F2.3	chrI	3875837	+	19	2.356	1231	1228
UTGB	GTSSWA200194.07	outron	7	FALSE	C50F2.3	chrI	3877033	+	14	0	35	32
UTGB	GTSSWA200195.01	exon	1	TRUE	C50F2.10	chrI	3885907	-	83	0.7994	16	-1
UTGB	GTSSWA200196.01	outron	1	TRUE	C50F2.9	chrI	3887114	-	12	10.34	31	20
UTGB	GTSSWA200197.01	exon	1	FALSE	C50F2.4	chrI	3891567	-	23	2.064	46	-1
UTGB	GTSSWA200197.02	exon	2	FALSE	C50F2.4	chrI	3891559	-	14	1.536	38	-1
UTGB	GTSSWA200197.03	exon	3	FALSE	C50F2.4	chrI	3891549	-	92	1.277	28	-1
UTGB	GTSSWA200197.04	exon	4	FALSE	C50F2.4	chrI	3891542	-	47	0	21	-1
UTGB	GTSSWA200197.05	exon	5	TRUE	C50F2.4	chrI	3891531	-	117	0.7343	10	-1
UTGB	GTSSWA200197.06	exon	6	FALSE	C50F2.4	chrI	3891529	-	97	0.7887	8	-1
UTGB	GTSSWA200197.07	exon	7	FALSE	C50F2.4	chrI	3891525	-	26	1.015	4	-1
UTGB	GTSSWA200198.01	exon	1	TRUE	C50F2.5	chrI	3897412	-	40	0	59	-1
UTGB	GTSSWA200199.01	outron	1	FALSE	T20F5.2	chrI	3908676	+	17	0	78	73
UTGB	GTSSWA200199.02	outron	2	TRUE	T20F5.2	chrI	3908735	+	24	1.802	19	14
UTGB	GTSSWA200200.01	exon	1	TRUE	T20F5.5	chrI	3920541	-	11	0	1365	-1
UTGB	GTSSWA200200.02	exon	2	FALSE	T20F5.5	chrI	3920230	-	10	0	1054	-1
UTGB	GTSSWA200201.01	outron	1	TRUE	T20F5.6.1	chrI	3925800	-	16	14.63	674	635
UTGB	GTSSWA200202.01	outron	1	TRUE	T21E3.1	chrI	3932034	+	10	0.8493	180	178
UTGB	GTSSWA200203.01	exon	1	TRUE	F47B3.4	chrI	3960976	+	18	0	63	-1
UTGB	GTSSWA200204.01	exon	1	FALSE	F47B3.7	chrI	3970045	-	24	1.201	101	-1
UTGB	GTSSWA200204.02	exon	2	TRUE	F47B3.7	chrI	3970019	-	60	0.5712	75	-1
UTGB	GTSSWA200204.03	exon	3	FALSE	F47B3.7	chrI	3970015	-	42	1.444	71	-1
UTGB	GTSSWA200205.01	outron	1	FALSE	F28H1.3.1	chrI	3982953	+	14	0	254	233
UTGB	GTSSWA200205.02	outron	2	TRUE	F28H1.3.1	chrI	3982986	+	80	6.703	221	200
UTGB	GTSSWA200206.01	exon	1	TRUE	F28H1.2.1	chrI	3987942	+	1349	3.165	38	-1
UTGB	GTSSWA200207.01	exon	1	FALSE	C09D1.1b	chrI	4035708	+	11	0	186	-1
UTGB	GTSSWA200207.02	exon	2	FALSE	C09D1.1b	chrI	4035730	+	25	0.6267	164	-1
UTGB	GTSSWA200207.03	exon	3	FALSE	C09D1.1b	chrI	4035745	+	109	1.701	149	-1
UTGB	GTSSWA200207.04	exon	4	TRUE	C09D1.1b	chrI	4035748	+	483	1.271	146	-1
UTGB	GTSSWA200207.05	exon	5	FALSE	C09D1.1b	chrI	4035759	+	86	0.689	135	-1
UTGB	GTSSWA200208.01	outron	1	TRUE	H31G24.4	chrI	4114711	+	13	0	168	137
UTGB	GTSSWA200208.02	outron	2	FALSE	H31G24.4	chrI	4114719	+	13	0	160	129
UTGB	GTSSWA200209.01	exon	1	FALSE	E01A2.4.1	chrI	4132276	-	22	10.99	82	-1
UTGB	GTSSWA200209.02	exon	2	FALSE	E01A2.4.1	chrI	4132254	-	35	1.576	60	-1
UTGB	GTSSWA200209.03	exon	3	TRUE	E01A2.4.1	chrI	4132246	-	98	4.826	52	-1
UTGB	GTSSWA200210.01	outron	1	TRUE	E01A2.2a	chrI	4132384	+	52	16.6	118	117
UTGB	GTSSWA200211.01	outron	1	TRUE	E01A2.6	chrI	4139414	-	175	5.808	467	460
UTGB	GTSSWA200211.02	outron	2	FALSE	E01A2.6	chrI	4139397	-	21	2.305	450	443
UTGB	GTSSWA200211.03	outron	3	FALSE	E01A2.6	chrI	4139389	-	15	0	442	435
UTGB	GTSSWA200211.04	outron	4	FALSE	E01A2.6	chrI	4139072	-	21	0.6318	125	118
UTGB	GTSSWA200212.01	exon	1	FALSE	E01A2.10	chrI	4147165	-	10	0	68	-1
UTGB	GTSSWA200212.02	exon	2	FALSE	E01A2.10	chrI	4147155	-	30	0.6444	58	-1
UTGB	GTSSWA200212.03	exon	3	FALSE	E01A2.10	chrI	4147148	-	22	4.178	51	-1
UTGB	GTSSWA200212.04	exon	4	TRUE	E01A2.10	chrI	4147137	-	134	4.409	40	-1
UTGB	GTSSWA200213.01	exon	1	TRUE	R12E2.15	chrI	4149430	-	224	0.7433	17	-1
UTGB	GTSSWA200213.02	exon	2	FALSE	R12E2.15	chrI	4149428	-	18	2.183	15	-1
UTGB	GTSSWA200214.01	exon	1	FALSE	R12E2.14	chrI	4149980	+	15	0	21	-1
UTGB	GTSSWA200214.02	exon	2	TRUE	R12E2.14	chrI	4149982	+	258	0.482	19	-1
UTGB	GTSSWA200214.03	exon	3	FALSE	R12E2.14	chrI	4149985	+	98	1.183	16	-1
UTGB	GTSSWA200215.01	exon	1	TRUE	R12E2.7	chrI	4154439	-	142	0.9571	33	-1
UTGB	GTSSWA200216.01	exon	1	TRUE	R12E2.10	chrI	4171719	-	13	5.522	130	-1
UTGB	GTSSWA200217.01	outron	1	FALSE	R12E2.12	chrI	4175013	-	10	0	272	237
UTGB	GTSSWA200217.02	outron	2	TRUE	R12E2.12	chrI	4175008	-	13	0	267	232
UTGB	GTSSWA200218.01	outron	1	TRUE	R12E2.13.1	chrI	4178544	-	15	0	107	95
UTGB	GTSSWA200218.02	outron	2	FALSE	R12E2.13.1	chrI	4178519	-	13	0	82	70
UTGB	GTSSWA200219.01	outron	1	TRUE	R12E2.1	chrI	4181745	+	11	3.864	477	477
UTGB	GTSSWA200220.01	exon	1	TRUE	C18E3.1	chrI	4212712	+	43	1.446	32	-1
UTGB	GTSSWA200220.02	exon	2	FALSE	C18E3.1	chrI	4212722	+	20	2.088	22	-1
UTGB	GTSSWA200221.01	exon	1	FALSE	C18E3.9a	chrI	4215770	-	10	2.548	100	-1
UTGB	GTSSWA200221.02	exon	2	TRUE	C18E3.9a	chrI	4215750	-	122	4.33	80	-1
UTGB	GTSSWA200221.03	exon	3	FALSE	C18E3.9a	chrI	4215727	-	29	2.873	57	-1
UTGB	GTSSWA200221.04	exon	4	FALSE	C18E3.9a	chrI	4215713	-	13	2.656	43	-1
UTGB	GTSSWA200222.01	outron	1	TRUE	C43E11.5	chrI	4236975	+	57	0	60	25
UTGB	GTSSWA200223.01	exon	1	TRUE	C43E11.8	chrI	4247583	-	16	0	1	-1
UTGB	GTSSWA200224.01	outron	1	TRUE	C43E11.4	chrI	4247647	+	25	0.6624	115	110
UTGB	GTSSWA200224.02	outron	2	FALSE	C43E11.4	chrI	4247664	+	20	0	98	93
UTGB	GTSSWA200224.03	outron	3	FALSE	C43E11.4	chrI	4247669	+	17	0.7507	93	88
UTGB	GTSSWA200225.01	outron	1	TRUE	C43E11.2a	chrI	4264487	+	15	7.809	623	623
UTGB	GTSSWA200226.01	outron	1	TRUE	C43E11.10	chrI	4270493	-	32	1.038	204	204
UTGB	GTSSWA200226.02	outron	2	FALSE	C43E11.10	chrI	4270488	-	26	0.6173	199	199
UTGB	GTSSWA200226.03	outron	3	FALSE	C43E11.10	chrI	4270483	-	14	0.8493	194	194
UTGB	GTSSWA200227.01	outron	1	FALSE	C43E11.1	chrI	4270608	+	11	0	128	113
UTGB	GTSSWA200227.02	outron	2	TRUE	C43E11.1	chrI	4270648	+	52	2.067	88	73
UTGB	GTSSWA200228.01	exon	1	TRUE	Y47D9A.5.1	chrI	4279623	-	19	0.7603	45	-1
UTGB	GTSSWA200229.01	outron	1	TRUE	Y47D9A.2b	chrI	4298422	+	11	0	205	57
UTGB	GTSSWA200230.01	outron	1	TRUE	Y47D9A.1a	chrI	4302482	+	10	0	1523	1449
UTGB	GTSSWA200231.01	exon	1	TRUE	ZK973.6	chrI	4320889	+	35	0	207	-1
UTGB	GTSSWA200231.02	exon	2	FALSE	ZK973.6	chrI	4320897	+	20	0.6901	199	-1
UTGB	GTSSWA200231.03	exon	3	FALSE	ZK973.6	chrI	4320968	+	12	2.889	128	-1
UTGB	GTSSWA200232.01	exon	1	TRUE	ZK973.8	chrI	4367910	-	17	0	959	-1
UTGB	GTSSWA200233.01	exon	1	FALSE	ZK973.11	chrI	4381852	-	27	17	80	-1
UTGB	GTSSWA200233.02	exon	2	TRUE	ZK973.11	chrI	4381826	-	44	0.5215	54	-1
UTGB	GTSSWA200233.03	exon	3	FALSE	ZK973.11	chrI	4381816	-	11	3.759	44	-1
UTGB	GTSSWA200233.04	exon	4	FALSE	ZK973.11	chrI	4381807	-	10	0	35	-1
UTGB	GTSSWA200234.01	outron	1	FALSE	ZK973.1	chrI	4381926	+	22	3.633	640	640
UTGB	GTSSWA200234.02	outron	2	TRUE	ZK973.1	chrI	4381931	+	30	0	635	635
UTGB	GTSSWA200234.03	outron	3	FALSE	ZK973.1	chrI	4381958	+	10	0	608	608
UTGB	GTSSWA200235.01	outron	1	TRUE	Y119C1B.4	chrI	4511228	-	22	0	102	100
UTGB	GTSSWA200236.01	outron	1	FALSE	Y119C1B.8a	chrI	4537759	-	10	0	2959	2959
UTGB	GTSSWA200236.02	outron	2	TRUE	Y119C1B.8a	chrI	4536035	-	14	0	1235	1235
UTGB	GTSSWA200236.03	outron	3	FALSE	Y119C1B.8a	chrI	4535931	-	10	0	1131	1131
UTGB	GTSSWA200237.01	outron	1	FALSE	D1007.14	chrI	4564036	+	21	2.361	105	95
UTGB	GTSSWA200237.02	outron	2	FALSE	D1007.14	chrI	4564045	+	68	1.316	96	86
UTGB	GTSSWA200237.03	outron	3	FALSE	D1007.14	chrI	4564052	+	11	0	89	79
UTGB	GTSSWA200237.04	outron	4	FALSE	D1007.14	chrI	4564062	+	111	0.8141	79	69
UTGB	GTSSWA200237.05	outron	5	FALSE	D1007.14	chrI	4564066	+	31	0.5518	75	65
UTGB	GTSSWA200237.06	outron	6	FALSE	D1007.14	chrI	4564070	+	10	0.9893	71	61
UTGB	GTSSWA200237.07	outron	7	FALSE	D1007.14	chrI	4564075	+	26	0	66	56
UTGB	GTSSWA200237.08	outron	8	TRUE	D1007.14	chrI	4564080	+	381	0.9286	61	51
UTGB	GTSSWA200237.09	outron	9	FALSE	D1007.14	chrI	4564086	+	122	0.7912	55	45
UTGB	GTSSWA200237.10	outron	10	FALSE	D1007.14	chrI	4564090	+	117	2.257	51	41
UTGB	GTSSWA200237.11	outron	11	FALSE	D1007.14	chrI	4564097	+	102	1.332	44	34
UTGB	GTSSWA200237.12	outron	12	FALSE	D1007.14	chrI	4564100	+	25	0	41	31
UTGB	GTSSWA200237.13	outron	13	FALSE	D1007.14	chrI	4564104	+	76	2.003	37	27
UTGB	GTSSWA200238.01	outron	1	FALSE	D1007.18	chrI	4579728	-	16	2.31	40	23
UTGB	GTSSWA200238.02	outron	2	TRUE	D1007.18	chrI	4579723	-	29	2.645	35	18
UTGB	GTSSWA200239.01	outron	1	FALSE	D1007.6.1	chrI	4585786	-	15	0	1293	1279
UTGB	GTSSWA200239.02	outron	2	FALSE	D1007.6.1	chrI	4584794	-	25	2.216	301	287
UTGB	GTSSWA200239.03	outron	3	FALSE	D1007.6.1	chrI	4584767	-	17	0	274	260
UTGB	GTSSWA200239.04	outron	4	FALSE	D1007.6.1	chrI	4584763	-	25	0.7804	270	256
UTGB	GTSSWA200239.05	outron	5	FALSE	D1007.6.1	chrI	4584757	-	18	0	264	250
UTGB	GTSSWA200239.06	outron	6	TRUE	D1007.6.1	chrI	4584745	-	32	0.8782	252	238
UTGB	GTSSWA200239.07	outron	7	FALSE	D1007.6.1	chrI	4584728	-	13	0	235	221
UTGB	GTSSWA200239.08	outron	8	FALSE	D1007.6.1	chrI	4584720	-	23	0	227	213
UTGB	GTSSWA200239.09	outron	9	FALSE	D1007.6.1	chrI	4584712	-	15	3.461	219	205
UTGB	GTSSWA200239.10	outron	10	FALSE	D1007.6.1	chrI	4584534	-	20	0	41	27
UTGB	GTSSWA200239.11	outron	11	FALSE	D1007.6.1	chrI	4584528	-	29	1.961	35	21
UTGB	GTSSWA200240.01	outron	1	FALSE	D1007.12.1	chrI	4584946	+	35	10.24	196	170
UTGB	GTSSWA200240.02	outron	2	FALSE	D1007.12.1	chrI	4584983	+	12	3.023	159	133
UTGB	GTSSWA200240.03	outron	3	FALSE	D1007.12.1	chrI	4584992	+	40	0	150	124
UTGB	GTSSWA200240.04	exon	4	TRUE	D1007.12.1	chrI	4585141	+	55	3.642	1	-1
UTGB	GTSSWA200241.01	outron	1	TRUE	D1007.7	chrI	4602999	-	11	0	358	331
UTGB	GTSSWA200242.01	outron	1	FALSE	C44E4.6.2	chrI	4636414	-	13	1.447	71	33
UTGB	GTSSWA200242.02	outron	2	FALSE	C44E4.6.2	chrI	4636407	-	22	0	64	26
UTGB	GTSSWA200242.03	outron	3	TRUE	C44E4.6.2	chrI	4636404	-	44	0.5215	61	23
UTGB	GTSSWA200243.01	outron	1	TRUE	B0041.4.1	chrI	4647130	-	25	1.312	171	165
UTGB	GTSSWA200243.02	outron	2	FALSE	B0041.4.1	chrI	4646981	-	15	2.216	22	16
UTGB	GTSSWA200244.01	outron	1	FALSE	B0041.8.1	chrI	4646030	+	13	0	1395	1395
UTGB	GTSSWA200244.02	outron	2	FALSE	B0041.8.1	chrI	4646554	+	50	0	871	871
UTGB	GTSSWA200244.03	outron	3	FALSE	B0041.8.1	chrI	4647328	+	55	7.992	97	97
UTGB	GTSSWA200244.04	outron	4	FALSE	B0041.8.1	chrI	4647340	+	24	0.8493	85	85
UTGB	GTSSWA200244.05	outron	5	TRUE	B0041.8.1	chrI	4647349	+	309	1.262	76	76
UTGB	GTSSWA200244.06	outron	6	FALSE	B0041.8.1	chrI	4647357	+	37	2.444	68	68
UTGB	GTSSWA200244.07	outron	7	FALSE	B0041.8.1	chrI	4647386	+	12	14.14	39	39
UTGB	GTSSWA200245.01	exon	1	TRUE	B0041.1	chrI	4664500	+	39	1.48	372	-1
UTGB	GTSSWA200246.01	outron	1	TRUE	B0041.7	chrI	4672218	-	13	0	502	478
UTGB	GTSSWA200247.01	outron	1	TRUE	W09C3.7	chrI	4715484	-	221	0	321	274
UTGB	GTSSWA200248.01	exon	1	TRUE	W09C3.8	chrI	4717451	-	25	0.5574	8	-1
UTGB	GTSSWA200249.01	exon	1	TRUE	W09C3.1	chrI	4717558	+	16	0	66	-1
UTGB	GTSSWA200250.01	exon	1	TRUE	C10H11.7	chrI	4719760	+	14	3.657	44	-1
UTGB	GTSSWA200251.01	exon	1	TRUE	C10H11.6a	chrI	4721179	+	15	0	28	-1
UTGB	GTSSWA200251.02	exon	2	FALSE	C10H11.6a	chrI	4721190	+	11	1.578	17	-1
UTGB	GTSSWA200252.01	exon	1	FALSE	C10H11.4	chrI	4727282	+	10	0	50	-1
UTGB	GTSSWA200252.02	exon	2	TRUE	C10H11.4	chrI	4727309	+	194	0.769	23	-1
UTGB	GTSSWA200252.03	exon	3	FALSE	C10H11.4	chrI	4727316	+	52	1.874	16	-1
UTGB	GTSSWA200252.04	exon	4	FALSE	C10H11.4	chrI	4727329	+	19	0	3	-1
UTGB	GTSSWA200253.01	exon	1	TRUE	C10H11.3	chrI	4731607	+	37	0	17	-1
UTGB	GTSSWA200254.01	outron	1	TRUE	C10H11.8	chrI	4738563	-	11	0	777	463
UTGB	GTSSWA200255.01	outron	1	TRUE	M04F3.3	chrI	4765206	-	40	0.6006	64	36
UTGB	GTSSWA200256.01	outron	1	TRUE	M04F3.1.1	chrI	4768022	+	15	0	2283	2271
UTGB	GTSSWA200256.02	outron	2	FALSE	M04F3.1.1	chrI	4770108	+	10	0	197	185
UTGB	GTSSWA200257.01	outron	1	FALSE	M04F3.4	chrI	4773067	-	10	0	41	41
UTGB	GTSSWA200257.02	outron	2	TRUE	M04F3.4	chrI	4773061	-	10	0	35	35
UTGB	GTSSWA200258.01	outron	1	TRUE	F54D7.6	chrI	4789061	+	14	2.548	533	168
UTGB	GTSSWA200259.01	outron	1	FALSE	F54D7.7	chrI	4790097	+	24	0	558	196
UTGB	GTSSWA200259.02	outron	2	FALSE	F54D7.7	chrI	4790124	+	34	1.365	531	169
UTGB	GTSSWA200259.03	outron	3	TRUE	F54D7.7	chrI	4790131	+	96	0.5374	524	162
UTGB	GTSSWA200259.04	outron	4	FALSE	F54D7.7	chrI	4790249	+	10	2.548	406	44
UTGB	GTSSWA200260.01	exon	1	TRUE	F54D7.4	chrI	4792485	-	17	0	8	-1
UTGB	GTSSWA200261.01	outron	1	TRUE	F57C9.5	chrI	4826984	+	29	5.032	96	89
UTGB	GTSSWA200261.02	outron	2	FALSE	F57C9.5	chrI	4826999	+	15	0	81	74
UTGB	GTSSWA200261.03	outron	3	FALSE	F57C9.5	chrI	4827003	+	24	0.9631	77	70
UTGB	GTSSWA200261.04	outron	4	FALSE	F57C9.5	chrI	4827007	+	11	0	73	66
UTGB	GTSSWA200261.05	outron	5	FALSE	F57C9.5	chrI	4827014	+	13	0	66	59
UTGB	GTSSWA200261.06	outron	6	FALSE	F57C9.5	chrI	4827025	+	24	0	55	48
UTGB	GTSSWA200262.01	outron	1	TRUE	F25F8.2	chrI	4888003	-	31	1.159	60	43
UTGB	GTSSWA200262.02	outron	2	FALSE	F25F8.2	chrI	4887996	-	16	1.864	53	36
UTGB	GTSSWA200262.03	outron	3	FALSE	F25F8.2	chrI	4887990	-	15	2.95	47	30
UTGB	GTSSWA200263.01	exon	1	FALSE	F21F3.4	chrI	4895956	+	11	3.423	48	-1
UTGB	GTSSWA200263.02	exon	2	FALSE	F21F3.4	chrI	4895963	+	34	0	41	-1
UTGB	GTSSWA200263.03	exon	3	TRUE	F21F3.4	chrI	4895980	+	64	0.519	24	-1
UTGB	GTSSWA200263.04	exon	4	FALSE	F21F3.4	chrI	4895990	+	29	1.954	14	-1
UTGB	GTSSWA200263.05	exon	5	FALSE	F21F3.4	chrI	4895998	+	14	0	6	-1
UTGB	GTSSWA200264.01	exon	1	TRUE	F21F3.3	chrI	4901973	+	23	0	26	-1
UTGB	GTSSWA200265.01	outron	1	FALSE	F28B3.8	chrI	4926529	-	10	0	332	294
UTGB	GTSSWA200265.02	outron	2	TRUE	F28B3.8	chrI	4926510	-	18	0	313	275
UTGB	GTSSWA200265.03	outron	3	FALSE	F28B3.8	chrI	4926471	-	13	1.797	274	236
UTGB	GTSSWA200266.01	outron	1	FALSE	F28B3.5a	chrI	4926630	+	12	1.318	104	82
UTGB	GTSSWA200266.02	outron	2	FALSE	F28B3.5a	chrI	4926640	+	12	0.7557	94	72
UTGB	GTSSWA200266.03	outron	3	FALSE	F28B3.5a	chrI	4926652	+	14	1.66	82	60
UTGB	GTSSWA200266.04	outron	4	TRUE	F28B3.5a	chrI	4926662	+	24	0.5646	72	50
UTGB	GTSSWA200266.05	outron	5	FALSE	F28B3.5a	chrI	4926670	+	12	0	64	42
UTGB	GTSSWA200267.01	outron	1	TRUE	W03G9.8	chrI	4958310	-	65	1.249	154	114
UTGB	GTSSWA200267.02	outron	2	FALSE	W03G9.8	chrI	4958304	-	33	1.12	148	108
UTGB	GTSSWA200267.03	outron	3	FALSE	W03G9.8	chrI	4958287	-	10	3.957	131	91
UTGB	GTSSWA200268.01	outron	1	TRUE	W03G9.4.1	chrI	4967374	-	18	0.7276	302	283
UTGB	GTSSWA200269.01	exon	1	TRUE	W03G9.5	chrI	4970290	-	48	0.6556	43	-1
UTGB	GTSSWA200270.01	exon	1	TRUE	F54C1.1	chrI	5008773	+	35	0.7105	20	-1
UTGB	GTSSWA200271.01	exon	1	TRUE	F54C1.7.1	chrI	5020081	-	10	0	17	-1
UTGB	GTSSWA200272.01	exon	1	TRUE	C46H11.7	chrI	5043066	-	55	0	10	-1
UTGB	GTSSWA200273.01	exon	1	TRUE	C46H11.8	chrI	5045734	-	30	0	10	-1
UTGB	GTSSWA200274.01	exon	1	TRUE	C46H11.9	chrI	5048018	-	16	1.555	24	-1
UTGB	GTSSWA200275.01	outron	1	TRUE	C46H11.2	chrI	5050068	+	12	0	63	63
UTGB	GTSSWA200276.01	outron	1	FALSE	C30F8.2.1	chrI	5082415	-	13	0	154	146
UTGB	GTSSWA200276.02	outron	2	TRUE	C30F8.2.1	chrI	5082394	-	20	0	133	125
UTGB	GTSSWA200276.03	outron	3	FALSE	C30F8.2.1	chrI	5082357	-	12	0	96	88
UTGB	GTSSWA200277.01	exon	1	TRUE	Y110A7A.12	chrI	5103413	-	10	2.548	8	-1
UTGB	GTSSWA200278.01	outron	1	TRUE	Y110A7A.13	chrI	5104959	-	30	1.758	44	44
UTGB	GTSSWA200279.01	outron	1	FALSE	Y110A7A.14.1	chrI	5106160	-	12	3.44	111	108
UTGB	GTSSWA200279.02	outron	2	TRUE	Y110A7A.14.1	chrI	5106140	-	29	1.024	91	88
UTGB	GTSSWA200279.03	outron	3	FALSE	Y110A7A.14.1	chrI	5106130	-	20	0	81	78
UTGB	GTSSWA200279.04	outron	4	FALSE	Y110A7A.14.1	chrI	5106125	-	21	0	76	73
UTGB	GTSSWA200280.01	exon	1	TRUE	Y110A7A.11	chrI	5106255	+	34	11.71	41	-1
UTGB	GTSSWA200281.01	exon	1	TRUE	Y110A7A.21	chrI	5111371	-	14	2.787	234	-1
UTGB	GTSSWA200282.01	outron	1	TRUE	Y110A7A.15a	chrI	5113874	-	19	4.037	132	118
UTGB	GTSSWA200282.02	outron	2	FALSE	Y110A7A.15a	chrI	5113827	-	11	0	85	71
UTGB	GTSSWA200282.03	outron	3	FALSE	Y110A7A.15a	chrI	5113797	-	16	2.063	55	41
UTGB	GTSSWA200283.01	outron	1	TRUE	Y110A7A.16	chrI	5118890	-	16	1.541	39	34
UTGB	GTSSWA200283.02	outron	2	FALSE	Y110A7A.16	chrI	5118877	-	10	0	26	21
UTGB	GTSSWA200284.01	outron	1	TRUE	Y110A7A.6b.1	chrI	5131512	+	39	1.545	13	11
UTGB	GTSSWA200285.01	outron	1	TRUE	Y110A7A.4	chrI	5138158	+	31	16.37	115	106
UTGB	GTSSWA200286.01	outron	1	TRUE	Y110A7A.18	chrI	5162462	-	16	2.797	254	229
UTGB	GTSSWA200286.02	outron	2	FALSE	Y110A7A.18	chrI	5162457	-	12	3.023	249	224
UTGB	GTSSWA200287.01	outron	1	TRUE	Y110A7A.19.1	chrI	5164949	-	19	0	76	61
UTGB	GTSSWA200288.01	outron	1	FALSE	Y110A7A.1b	chrI	5165099	+	15	5.988	61	56
UTGB	GTSSWA200288.02	outron	2	TRUE	Y110A7A.1b	chrI	5165103	+	19	0	57	52
UTGB	GTSSWA200288.03	outron	3	FALSE	Y110A7A.1b	chrI	5165122	+	10	0	38	33
UTGB	GTSSWA200288.04	outron	4	FALSE	Y110A7A.1b	chrI	5165141	+	12	0.7557	19	14
UTGB	GTSSWA200289.01	outron	1	TRUE	F56A3.4	chrI	5176104	-	112	0	579	564
UTGB	GTSSWA200289.02	outron	2	FALSE	F56A3.4	chrI	5176096	-	28	0	571	556
UTGB	GTSSWA200290.01	exon	1	TRUE	B0261.4a	chrI	5244354	+	14	0	42	-1
UTGB	GTSSWA200291.01	exon	1	FALSE	B0261.6a	chrI	5258717	-	12	0	1816	-1
UTGB	GTSSWA200291.02	exon	2	TRUE	B0261.6a	chrI	5256926	-	50	0.466	25	-1
UTGB	GTSSWA200292.01	outron	1	TRUE	B0261.1	chrI	5263027	+	21	15.74	684	670
UTGB	GTSSWA200293.01	outron	1	FALSE	B0261.7	chrI	5271142	-	12	0	204	199
UTGB	GTSSWA200293.02	outron	2	TRUE	B0261.7	chrI	5271092	-	12	0	154	149
UTGB	GTSSWA200294.01	exon	1	FALSE	C01G8.1b	chrI	5274339	-	13	0.7234	127	-1
UTGB	GTSSWA200294.02	exon	2	FALSE	C01G8.1b	chrI	5274325	-	27	1.492	113	-1
UTGB	GTSSWA200294.03	exon	3	FALSE	C01G8.1b	chrI	5274296	-	26	0.5507	84	-1
UTGB	GTSSWA200294.04	exon	4	FALSE	C01G8.1b	chrI	5274283	-	127	0.4154	71	-1
UTGB	GTSSWA200294.05	exon	5	FALSE	C01G8.1b	chrI	5274272	-	280	1.262	60	-1
UTGB	GTSSWA200294.06	exon	6	FALSE	C01G8.1b	chrI	5274266	-	17	1.915	54	-1
UTGB	GTSSWA200294.07	exon	7	FALSE	C01G8.1b	chrI	5274264	-	433	0.4753	52	-1
UTGB	GTSSWA200294.08	exon	8	FALSE	C01G8.1b	chrI	5274260	-	164	0.5425	48	-1
UTGB	GTSSWA200294.09	exon	9	FALSE	C01G8.1b	chrI	5274259	-	70	0.9668	47	-1
UTGB	GTSSWA200294.10	exon	10	FALSE	C01G8.1b	chrI	5274252	-	111	0.4741	40	-1
UTGB	GTSSWA200294.11	exon	11	TRUE	C01G8.1b	chrI	5274248	-	882	0.8946	36	-1
UTGB	GTSSWA200294.12	exon	12	FALSE	C01G8.1b	chrI	5274244	-	83	1.27	32	-1
UTGB	GTSSWA200295.01	outron	1	TRUE	C01G8.6	chrI	5300516	-	31	2.923	206	181
UTGB	GTSSWA200296.01	outron	1	TRUE	F48C1.4	chrI	5316575	-	11	0	2848	2647
UTGB	GTSSWA200296.02	outron	2	FALSE	F48C1.4	chrI	5314887	-	10	2.548	1160	959
UTGB	GTSSWA200297.01	outron	1	FALSE	F48C1.6	chrI	5319299	-	20	0	24	22
UTGB	GTSSWA200297.02	outron	2	FALSE	F48C1.6	chrI	5319293	-	39	0.5168	18	16
UTGB	GTSSWA200297.03	outron	3	TRUE	F48C1.6	chrI	5319290	-	61	0	15	13
UTGB	GTSSWA200298.01	exon	1	TRUE	F48C1.7	chrI	5332183	-	20	0.7387	22	-1
UTGB	GTSSWA200299.01	exon	1	FALSE	F48C1.9.1	chrI	5332880	-	19	2.756	116	-1
UTGB	GTSSWA200299.02	exon	2	FALSE	F48C1.9.1	chrI	5332871	-	44	0	107	-1
UTGB	GTSSWA200299.03	exon	3	FALSE	F48C1.9.1	chrI	5332853	-	51	3.356	89	-1
UTGB	GTSSWA200299.04	exon	4	FALSE	F48C1.9.1	chrI	5332821	-	18	0	57	-1
UTGB	GTSSWA200299.05	exon	5	FALSE	F48C1.9.1	chrI	5332785	-	21	0.8209	21	-1
UTGB	GTSSWA200299.06	exon	6	TRUE	F48C1.9.1	chrI	5332783	-	1438	0.3803	19	-1
UTGB	GTSSWA200299.07	exon	7	FALSE	F48C1.9.1	chrI	5332778	-	85	1.875	14	-1
UTGB	GTSSWA200299.08	exon	8	FALSE	F48C1.9.1	chrI	5332770	-	27	0.5766	6	-1
UTGB	GTSSWA200299.09	exon	9	FALSE	F48C1.9.1	chrI	5332767	-	10	0.8493	3	-1
UTGB	GTSSWA200300.01	outron	1	FALSE	F55A12.5	chrI	5344521	+	15	0	1410	1409
UTGB	GTSSWA200300.02	outron	2	TRUE	F55A12.5	chrI	5344530	+	63	0.604	1401	1400
UTGB	GTSSWA200301.01	outron	1	TRUE	F55A12.10	chrI	5370633	-	11	0	2813	2800
UTGB	GTSSWA200302.01	outron	1	FALSE	F55A12.1	chrI	5368044	+	11	3.185	437	413
UTGB	GTSSWA200302.02	outron	2	FALSE	F55A12.1	chrI	5368065	+	11	6.314	416	392
UTGB	GTSSWA200302.03	outron	3	FALSE	F55A12.1	chrI	5368281	+	27	3.546	200	176
UTGB	GTSSWA200302.04	outron	4	FALSE	F55A12.1	chrI	5368296	+	13	3.895	185	161
UTGB	GTSSWA200302.05	outron	5	TRUE	F55A12.1	chrI	5368301	+	35	0.6573	180	156
UTGB	GTSSWA200303.01	outron	1	FALSE	F55A12.9d.4	chrI	5377464	-	10	1.699	1143	1119
UTGB	GTSSWA200303.02	outron	2	TRUE	F55A12.9d.4	chrI	5377458	-	53	0.9914	1137	1113
UTGB	GTSSWA200303.03	outron	3	FALSE	F55A12.9d.4	chrI	5377454	-	14	2.091	1133	1109
UTGB	GTSSWA200303.04	outron	4	FALSE	F55A12.9d.4	chrI	5377441	-	28	0	1120	1096
UTGB	GTSSWA200304.01	exon	1	TRUE	C24A11.5	chrI	5388595	-	21	0	2854	-1
UTGB	GTSSWA200305.01	exon	1	FALSE	C24A11.1	chrI	5400719	+	11	6.379	1143	-1
UTGB	GTSSWA200305.02	exon	2	TRUE	C24A11.1	chrI	5401811	+	53	0.5802	51	-1
UTGB	GTSSWA200306.01	outron	1	TRUE	C24A11.9	chrI	5417093	-	33	14.44	1554	1460
UTGB	GTSSWA200306.02	outron	2	FALSE	C24A11.9	chrI	5417008	-	13	0	1469	1375
UTGB	GTSSWA200307.01	exon	1	TRUE	F27C1.3	chrI	5426309	+	24	0.6006	58	-1
UTGB	GTSSWA200307.02	exon	2	FALSE	F27C1.3	chrI	5426315	+	13	0.8042	52	-1
UTGB	GTSSWA200308.01	exon	1	FALSE	F27C1.7b	chrI	5429905	-	31	3.417	95	-1
UTGB	GTSSWA200308.02	exon	2	FALSE	F27C1.7b	chrI	5429852	-	23	0.6483	42	-1
UTGB	GTSSWA200308.03	exon	3	FALSE	F27C1.7b	chrI	5429848	-	67	1.287	38	-1
UTGB	GTSSWA200308.04	exon	4	TRUE	F27C1.7b	chrI	5429841	-	100	1.564	31	-1
UTGB	GTSSWA200308.05	exon	5	FALSE	F27C1.7b	chrI	5429831	-	72	5.735	21	-1
UTGB	GTSSWA200309.01	outron	1	FALSE	F27C1.2b	chrI	5429964	+	19	1.28	206	203
UTGB	GTSSWA200309.02	outron	2	FALSE	F27C1.2b	chrI	5429979	+	114	3.062	191	188
UTGB	GTSSWA200309.03	outron	3	FALSE	F27C1.2b	chrI	5430006	+	34	0	164	161
UTGB	GTSSWA200309.04	outron	4	FALSE	F27C1.2b	chrI	5430010	+	54	0.5725	160	157
UTGB	GTSSWA200309.05	outron	5	FALSE	F27C1.2b	chrI	5430021	+	39	1.217	149	146
UTGB	GTSSWA200309.06	outron	6	TRUE	F27C1.2b	chrI	5430084	+	262	0.7387	86	83
UTGB	GTSSWA200310.01	outron	1	TRUE	F27C1.8.1	chrI	5433145	-	43	2.089	90	87
UTGB	GTSSWA200311.01	exon	1	TRUE	F27C1.1	chrI	5434810	+	595	1.19	47	-1
UTGB	GTSSWA200311.02	exon	2	FALSE	F27C1.1	chrI	5434813	+	17	0.6929	44	-1
UTGB	GTSSWA200311.03	exon	3	FALSE	F27C1.1	chrI	5434818	+	10	0	39	-1
UTGB	GTSSWA200312.01	outron	1	FALSE	C09D4.5.2	chrI	5485960	-	17	3.882	244	214
UTGB	GTSSWA200312.02	outron	2	TRUE	C09D4.5.2	chrI	5485952	-	173	0.7902	236	206
UTGB	GTSSWA200312.03	outron	3	FALSE	C09D4.5.2	chrI	5485939	-	24	0	223	193
UTGB	GTSSWA200312.04	outron	4	FALSE	C09D4.5.2	chrI	5485932	-	56	1.924	216	186
UTGB	GTSSWA200312.05	outron	5	FALSE	C09D4.5.2	chrI	5485928	-	86	0.7824	212	182
UTGB	GTSSWA200312.06	outron	6	FALSE	C09D4.5.2	chrI	5485926	-	133	0.6827	210	180
UTGB	GTSSWA200312.07	outron	7	FALSE	C09D4.5.2	chrI	5485920	-	35	1.965	204	174
UTGB	GTSSWA200313.01	exon	1	FALSE	C09D4.1a	chrI	5497829	+	28	0	91	-1
UTGB	GTSSWA200313.02	exon	2	TRUE	C09D4.1a	chrI	5497835	+	90	0	85	-1
UTGB	GTSSWA200313.03	exon	3	FALSE	C09D4.1a	chrI	5497839	+	59	1.769	81	-1
UTGB	GTSSWA200314.01	outron	1	TRUE	F59A3.4	chrI	5509291	-	35	14.48	118	117
UTGB	GTSSWA200315.01	exon	1	TRUE	F59A3.8	chrI	5525343	-	44	0.4795	66	-1
UTGB	GTSSWA200316.01	outron	1	TRUE	F59A3.9	chrI	5533816	-	20	0.6006	102	100
UTGB	GTSSWA200317.01	outron	1	TRUE	M01A10.3.1	chrI	5550548	-	11	3.633	254	249
UTGB	GTSSWA200318.01	outron	1	TRUE	M01A10.1	chrI	5563858	+	91	2.543	60	45
UTGB	GTSSWA200319.01	outron	1	TRUE	M01E11.4c	chrI	5571954	-	25	0.6267	1873	1871
UTGB	GTSSWA200320.01	outron	1	FALSE	M01E11.5.1	chrI	5573031	-	55	11.28	110	78
UTGB	GTSSWA200320.02	outron	2	TRUE	M01E11.5.1	chrI	5572980	-	210	0.3912	59	27
UTGB	GTSSWA200320.03	outron	3	FALSE	M01E11.5.1	chrI	5572976	-	74	0.4605	55	23
UTGB	GTSSWA200320.04	outron	4	FALSE	M01E11.5.1	chrI	5572972	-	90	0.4425	51	19
UTGB	GTSSWA200320.05	outron	5	FALSE	M01E11.5.1	chrI	5572967	-	15	1.445	46	14
UTGB	GTSSWA200321.01	outron	1	TRUE	M01E11.3	chrI	5573141	+	13	2.332	105	76
UTGB	GTSSWA200322.01	outron	1	FALSE	M01E11.6	chrI	5579494	-	16	1.699	309	235
UTGB	GTSSWA200322.02	outron	2	FALSE	M01E11.6	chrI	5579480	-	14	0	295	221
UTGB	GTSSWA200322.03	outron	3	FALSE	M01E11.6	chrI	5579472	-	22	0.7479	287	213
UTGB	GTSSWA200322.04	outron	4	FALSE	M01E11.6	chrI	5579467	-	25	3.387	282	208
UTGB	GTSSWA200322.05	exon	5	FALSE	M01E11.6	chrI	5579209	-	10	0	24	-1
UTGB	GTSSWA200322.06	exon	6	FALSE	M01E11.6	chrI	5579205	-	108	0.4383	20	-1
UTGB	GTSSWA200322.07	exon	7	TRUE	M01E11.6	chrI	5579195	-	328	1.562	10	-1
UTGB	GTSSWA200323.01	outron	1	TRUE	F46F11.11	chrI	5607622	-	10	0	101	91
UTGB	GTSSWA200324.01	outron	1	TRUE	F46F11.6	chrI	5620035	-	175	0	1618	1480
UTGB	GTSSWA200325.01	outron	1	FALSE	F46F11.2.1	chrI	5617279	+	19	0	2326	2293
UTGB	GTSSWA200325.02	outron	2	TRUE	F46F11.2.1	chrI	5619387	+	86	4.466	218	185
UTGB	GTSSWA200325.03	outron	3	FALSE	F46F11.2.1	chrI	5619421	+	21	0	184	151
UTGB	GTSSWA200325.04	outron	4	FALSE	F46F11.2.1	chrI	5619430	+	61	1.846	175	142
UTGB	GTSSWA200325.05	outron	5	FALSE	F46F11.2.1	chrI	5619436	+	20	1.477	169	136
UTGB	GTSSWA200325.06	exon	6	FALSE	F46F11.2.1	chrI	5619597	+	56	6.925	8	-1
UTGB	GTSSWA200326.01	exon	1	TRUE	F46F11.7	chrI	5620520	+	16	1.555	271	-1
UTGB	GTSSWA200326.02	exon	2	FALSE	F46F11.7	chrI	5620780	+	16	0	11	-1
UTGB	GTSSWA200327.01	exon	1	FALSE	F46F11.8	chrI	5626485	-	17	0	407	-1
UTGB	GTSSWA200327.02	exon	2	FALSE	F46F11.8	chrI	5626137	-	11	0	59	-1
UTGB	GTSSWA200327.03	exon	3	TRUE	F46F11.8	chrI	5626114	-	74	1.544	36	-1
UTGB	GTSSWA200328.01	exon	1	TRUE	F55F8.7	chrI	5661264	-	33	0	48	-1
UTGB	GTSSWA200329.01	outron	1	TRUE	F55F8.9	chrI	5675093	-	23	0	1745	1737
UTGB	GTSSWA200330.01	outron	1	FALSE	T19B4.5	chrI	5673826	+	16	3.029	586	483
UTGB	GTSSWA200330.02	outron	2	TRUE	T19B4.5	chrI	5673849	+	20	0	563	460
UTGB	GTSSWA200331.01	outron	1	TRUE	T19B4.4	chrI	5676425	+	15	3.999	414	405
UTGB	GTSSWA200332.01	outron	1	TRUE	T19B4.7	chrI	5694150	-	83	0	2706	2643
UTGB	GTSSWA200332.02	outron	2	FALSE	T19B4.7	chrI	5693928	-	31	3.399	2484	2421
UTGB	GTSSWA200332.03	outron	3	FALSE	T19B4.7	chrI	5693825	-	65	0	2381	2318
UTGB	GTSSWA200332.04	outron	4	FALSE	T19B4.7	chrI	5691680	-	34	2.037	236	173
UTGB	GTSSWA200333.01	exon	1	TRUE	C04F1.3	chrI	5716591	+	16	1.298	88	-1
UTGB	GTSSWA200333.02	exon	2	FALSE	C04F1.3	chrI	5716598	+	16	0	81	-1
UTGB	GTSSWA200334.01	exon	1	TRUE	F56H1.2	chrI	5735532	+	44	0	706	-1
UTGB	GTSSWA200335.01	outron	1	FALSE	F56H1.4.1	chrI	5744036	-	27	2.356	478	461
UTGB	GTSSWA200335.02	outron	2	TRUE	F56H1.4.1	chrI	5744022	-	131	1.797	464	447
UTGB	GTSSWA200335.03	outron	3	FALSE	F56H1.4.1	chrI	5744019	-	14	1.44	461	444
UTGB	GTSSWA200336.01	outron	1	TRUE	F56H1.6	chrI	5744151	+	21	1.419	36	32
UTGB	GTSSWA200337.01	exon	1	TRUE	F56H1.1	chrI	5746640	+	15	0	88	-1
UTGB	GTSSWA200338.01	exon	1	TRUE	F56H1.7	chrI	5762422	-	33	10.26	51	-1
UTGB	GTSSWA200339.01	exon	1	FALSE	T22E7.1a	chrI	5768955	+	22	0.6608	68	-1
UTGB	GTSSWA200339.02	exon	2	FALSE	T22E7.1a	chrI	5768966	+	10	2.968	57	-1
UTGB	GTSSWA200339.03	exon	3	FALSE	T22E7.1a	chrI	5768981	+	17	0	42	-1
UTGB	GTSSWA200339.04	exon	4	TRUE	T22E7.1a	chrI	5768997	+	121	0	26	-1
UTGB	GTSSWA200339.05	exon	5	FALSE	T22E7.1a	chrI	5769005	+	19	0	18	-1
UTGB	GTSSWA200340.01	exon	1	TRUE	B0414.3	chrI	5774588	+	1008	1.16	36	-1
UTGB	GTSSWA200340.02	exon	2	FALSE	B0414.3	chrI	5774591	+	391	1.198	33	-1
UTGB	GTSSWA200341.01	outron	1	FALSE	B0414.5	chrI	5791969	-	21	0	242	213
UTGB	GTSSWA200341.02	outron	2	FALSE	B0414.5	chrI	5791955	-	13	1.762	228	199
UTGB	GTSSWA200341.03	outron	3	FALSE	B0414.5	chrI	5791946	-	10	0.8493	219	190
UTGB	GTSSWA200341.04	outron	4	TRUE	B0414.5	chrI	5791940	-	28	0	213	184
UTGB	GTSSWA200341.05	outron	5	FALSE	B0414.5	chrI	5791919	-	23	0	192	163
UTGB	GTSSWA200341.06	outron	6	FALSE	B0414.5	chrI	5791911	-	16	0	184	155
UTGB	GTSSWA200342.01	outron	1	TRUE	B0414.8b	chrI	5807294	-	65	0.4415	49	36
UTGB	GTSSWA200342.02	outron	2	FALSE	B0414.8b	chrI	5807291	-	12	0	46	33
UTGB	GTSSWA200342.03	outron	3	FALSE	B0414.8b	chrI	5807287	-	27	0.6746	42	29
UTGB	GTSSWA200342.04	outron	4	FALSE	B0414.8b	chrI	5807277	-	33	0.9517	32	19
UTGB	GTSSWA200343.01	outron	1	TRUE	C32F10.2	chrI	5807609	+	13	3.44	124	103
UTGB	GTSSWA200344.01	outron	1	FALSE	C32F10.5	chrI	5818232	-	10	1.979	103	102
UTGB	GTSSWA200344.02	outron	2	TRUE	C32F10.5	chrI	5818208	-	27	0	79	78
UTGB	GTSSWA200345.01	outron	1	TRUE	C32F10.8b.1	chrI	5826163	-	33	2.493	1086	1085
UTGB	GTSSWA200346.01	outron	1	TRUE	C32F10.1a	chrI	5827988	+	16	6.652	1415	1406
UTGB	GTSSWA200347.01	exon	1	TRUE	F33D11.7	chrI	5851907	-	62	0	75	-1
UTGB	GTSSWA200348.01	outron	1	TRUE	F33D11.12	chrI	5866004	-	15	0	1333	958
UTGB	GTSSWA200349.01	outron	1	TRUE	F33D11.10.1	chrI	5868735	-	11	2.28	602	592
UTGB	GTSSWA200350.01	outron	1	FALSE	F33D11.11	chrI	5871970	-	10	0	2019	2012
UTGB	GTSSWA200350.02	outron	2	TRUE	F33D11.11	chrI	5871964	-	11	0	2013	2006
UTGB	GTSSWA200351.01	outron	1	TRUE	C34G6.5	chrI	5872062	+	13	0	126	115
UTGB	GTSSWA200352.01	outron	1	TRUE	C34G6.7b.1	chrI	5904718	-	28	0	405	387
UTGB	GTSSWA200353.01	outron	1	FALSE	B0207.4	chrI	5937196	+	12	7.377	290	283
UTGB	GTSSWA200353.02	outron	2	TRUE	B0207.4	chrI	5937223	+	24	8.346	263	256
UTGB	GTSSWA200354.01	outron	1	TRUE	C06A5.6	chrI	5986045	-	650	12.96	183	173
UTGB	GTSSWA200355.01	outron	1	FALSE	C06A5.3a	chrI	5986431	+	11	0	71	63
UTGB	GTSSWA200355.02	outron	2	TRUE	C06A5.3a	chrI	5986453	+	18	0.8493	49	41
UTGB	GTSSWA200356.01	exon	1	TRUE	C06A5.2	chrI	6006335	+	12	0	34	-1
UTGB	GTSSWA200357.01	outron	1	TRUE	C06A5.9	chrI	6011560	-	14	1.064	87	60
UTGB	GTSSWA200358.01	outron	1	TRUE	C06A5.1	chrI	6011985	+	57	14.56	75	62
UTGB	GTSSWA200359.01	outron	1	TRUE	B0025.2.1	chrI	6022256	+	27	1.365	429	413
UTGB	GTSSWA200360.01	outron	1	FALSE	C27A12.8.1	chrI	6061315	-	13	0	360	359
UTGB	GTSSWA200360.02	outron	2	FALSE	C27A12.8.1	chrI	6061303	-	10	3.086	348	347
UTGB	GTSSWA200360.03	outron	3	TRUE	C27A12.8.1	chrI	6061286	-	28	0	331	330
UTGB	GTSSWA200361.01	outron	1	TRUE	ZK484.2a.1	chrI	6081397	+	22	0	421	417
UTGB	GTSSWA200362.01	exon	1	TRUE	ZK484.5	chrI	6087759	-	3440	1.514	27	-1
UTGB	GTSSWA200362.02	exon	2	FALSE	ZK484.5	chrI	6087753	-	55	2.29	21	-1
UTGB	GTSSWA200363.01	exon	1	TRUE	ZK484.6	chrI	6090897	-	18	0	37	-1
UTGB	GTSSWA200364.01	outron	1	FALSE	ZK484.1b.1	chrI	6091182	+	41	4.737	2166	2128
UTGB	GTSSWA200364.02	outron	2	TRUE	ZK484.1b.1	chrI	6091199	+	57	0.536	2149	2111
UTGB	GTSSWA200364.03	outron	3	FALSE	ZK484.1b.1	chrI	6092922	+	10	0	426	388
UTGB	GTSSWA200364.04	outron	4	FALSE	ZK484.1b.1	chrI	6092930	+	12	3.331	418	380
UTGB	GTSSWA200365.01	exon	1	FALSE	ZK484.7	chrI	6096594	-	14	0.9452	75	-1
UTGB	GTSSWA200365.02	exon	2	TRUE	ZK484.7	chrI	6096591	-	238	0.4874	72	-1
UTGB	GTSSWA200366.01	exon	1	TRUE	ZK484.8	chrI	6097839	-	1483	0.5221	45	-1
UTGB	GTSSWA200366.02	exon	2	FALSE	ZK484.8	chrI	6097836	-	413	0.4797	42	-1
UTGB	GTSSWA200366.03	exon	3	FALSE	ZK484.8	chrI	6097834	-	20	0.7791	40	-1
UTGB	GTSSWA200367.01	exon	1	TRUE	T27A3.4	chrI	6098958	+	139	0.3878	52	-1
UTGB	GTSSWA200368.01	exon	1	FALSE	T27A3.5	chrI	6101753	-	17	0	69	-1
UTGB	GTSSWA200368.02	exon	2	TRUE	T27A3.5	chrI	6101751	-	168	0.5014	67	-1
UTGB	GTSSWA200369.01	outron	1	TRUE	T27A3.6	chrI	6107991	-	49	9.748	273	273
UTGB	GTSSWA200370.01	exon	1	TRUE	F56F4.8	chrI	6149238	+	26	0	62	-1
UTGB	GTSSWA200371.01	exon	1	TRUE	T09B4.7	chrI	6163240	-	11	2.104	1572	-1
UTGB	GTSSWA200372.01	exon	1	TRUE	T09B4.3	chrI	6176328	+	27	2.273	54	-1
UTGB	GTSSWA200372.02	exon	2	FALSE	T09B4.3	chrI	6176339	+	18	0	43	-1
UTGB	GTSSWA200373.01	outron	1	TRUE	T09B4.9	chrI	6181533	-	37	1.531	690	690
UTGB	GTSSWA200374.01	outron	1	TRUE	T09B4.2	chrI	6184067	+	13	2.17	22	14
UTGB	GTSSWA200375.01	outron	1	TRUE	T08B2.9a	chrI	6215500	-	31	1.33	922	911
UTGB	GTSSWA200376.01	outron	1	TRUE	T08B2.5c	chrI	6215647	+	29	1.779	465	274
UTGB	GTSSWA200377.01	outron	1	TRUE	T08B2.10.2	chrI	6220946	-	53	1.916	193	179
UTGB	GTSSWA200377.02	outron	2	FALSE	T08B2.10.2	chrI	6220940	-	51	0.5018	187	173
UTGB	GTSSWA200377.03	outron	3	FALSE	T08B2.10.2	chrI	6220936	-	17	1.467	183	169
UTGB	GTSSWA200377.04	outron	4	FALSE	T08B2.10.2	chrI	6220916	-	12	4.467	163	149
UTGB	GTSSWA200378.01	outron	1	TRUE	T08B2.4	chrI	6224882	+	10	0	678	482
UTGB	GTSSWA200379.01	exon	1	FALSE	C48E7.10	chrI	6250099	-	306	0.4116	54	-1
UTGB	GTSSWA200379.02	exon	2	FALSE	C48E7.10	chrI	6250096	-	13	0	51	-1
UTGB	GTSSWA200379.03	exon	3	FALSE	C48E7.10	chrI	6250093	-	107	0.404	48	-1
UTGB	GTSSWA200379.04	exon	4	FALSE	C48E7.10	chrI	6250090	-	11	0	45	-1
UTGB	GTSSWA200379.05	exon	5	FALSE	C48E7.10	chrI	6250082	-	12	0	37	-1
UTGB	GTSSWA200379.06	exon	6	FALSE	C48E7.10	chrI	6250077	-	54	0.5117	32	-1
UTGB	GTSSWA200379.07	exon	7	FALSE	C48E7.10	chrI	6250074	-	64	0.4975	29	-1
UTGB	GTSSWA200379.08	exon	8	TRUE	C48E7.10	chrI	6250069	-	802	0.6083	24	-1
UTGB	GTSSWA200379.09	exon	9	FALSE	C48E7.10	chrI	6250062	-	18	5.197	17	-1
UTGB	GTSSWA200379.10	exon	10	FALSE	C48E7.10	chrI	6250060	-	63	1.907	15	-1
UTGB	GTSSWA200379.11	exon	11	FALSE	C48E7.10	chrI	6250050	-	183	0.4284	5	-1
UTGB	GTSSWA200379.12	exon	12	FALSE	C48E7.10	chrI	6250047	-	45	0	2	-1
UTGB	GTSSWA200380.01	outron	1	FALSE	C48E7.11	chrI	6253014	+	46	0.629	72	70
UTGB	GTSSWA200380.02	outron	2	FALSE	C48E7.11	chrI	6253022	+	10	0.8493	64	62
UTGB	GTSSWA200380.03	outron	3	FALSE	C48E7.11	chrI	6253033	+	31	1.97	53	51
UTGB	GTSSWA200380.04	outron	4	TRUE	C48E7.11	chrI	6253044	+	153	1.421	42	40
UTGB	GTSSWA200380.05	outron	5	FALSE	C48E7.11	chrI	6253050	+	16	0.714	36	34
UTGB	GTSSWA200380.06	outron	6	FALSE	C48E7.11	chrI	6253052	+	19	0.612	34	32
UTGB	GTSSWA200381.01	exon	1	TRUE	C10G11.9	chrI	6275293	-	195	1.864	51	-1
UTGB	GTSSWA200382.01	outron	1	TRUE	C10G11.7.1	chrI	6283591	+	39	0.6513	1419	1390
UTGB	GTSSWA200383.01	exon	1	TRUE	C10G11.6	chrI	6287624	+	11	6.504	2384	-1
UTGB	GTSSWA200384.01	outron	1	TRUE	C10G11.5a	chrI	6294876	+	32	0	205	195
UTGB	GTSSWA200384.02	outron	2	FALSE	C10G11.5a	chrI	6294882	+	19	0	199	189
UTGB	GTSSWA200385.01	exon	1	TRUE	F26B1.4	chrI	6311253	+	132	1.18	27	-1
UTGB	GTSSWA200386.01	outron	1	TRUE	F26B1.2a	chrI	6317434	+	68	1.313	285	269
UTGB	GTSSWA200386.02	outron	2	FALSE	F26B1.2a	chrI	6317441	+	12	0	278	262
UTGB	GTSSWA200386.03	outron	3	FALSE	F26B1.2a	chrI	6317455	+	31	0.5235	264	248
UTGB	GTSSWA200387.01	exon	1	TRUE	K04F10.3a	chrI	6358653	+	49	0.468	24	-1
UTGB	GTSSWA200387.02	exon	2	FALSE	K04F10.3a	chrI	6358655	+	24	0	22	-1
UTGB	GTSSWA200387.03	exon	3	FALSE	K04F10.3a	chrI	6358660	+	25	2.618	17	-1
UTGB	GTSSWA200388.01	exon	1	TRUE	K04F10.1	chrI	6365021	+	17	3.122	50	-1
UTGB	GTSSWA200389.01	exon	1	FALSE	K04F10.7	chrI	6366347	+	14	8.865	133	-1
UTGB	GTSSWA200389.02	exon	2	TRUE	K04F10.7	chrI	6366383	+	179	7.96	97	-1
UTGB	GTSSWA200389.03	exon	3	FALSE	K04F10.7	chrI	6366437	+	102	4.587	43	-1
UTGB	GTSSWA200390.01	exon	1	TRUE	ZC308.4b	chrI	6368273	+	746	9.718	35	-1
UTGB	GTSSWA200391.01	outron	1	TRUE	ZC308.1a	chrI	6369946	+	70	4.982	85	21
UTGB	GTSSWA200391.02	exon	2	FALSE	ZC308.1a	chrI	6369980	+	41	0	51	-1
UTGB	GTSSWA200392.01	outron	1	TRUE	ZC328.4	chrI	6407460	+	13	0	76	74
UTGB	GTSSWA200392.02	outron	2	FALSE	ZC328.4	chrI	6407522	+	12	1.511	14	12
UTGB	GTSSWA200393.01	exon	1	FALSE	ZC328.3a	chrI	6417012	-	10	0	383	-1
UTGB	GTSSWA200393.02	exon	2	TRUE	ZC328.3a	chrI	6416830	-	19	2.831	201	-1
UTGB	GTSSWA200394.01	exon	1	TRUE	R10A10.2	chrI	6421932	-	58	0.9033	80	-1
UTGB	GTSSWA200394.02	exon	2	FALSE	R10A10.2	chrI	6421908	-	38	1.454	56	-1
UTGB	GTSSWA200394.03	exon	3	FALSE	R10A10.2	chrI	6421907	-	13	1.946	55	-1
UTGB	GTSSWA200394.04	exon	4	FALSE	R10A10.2	chrI	6421896	-	15	5.946	44	-1
UTGB	GTSSWA200395.01	exon	1	FALSE	F37E3.1	chrI	6422006	+	69	1.309	102	-1
UTGB	GTSSWA200395.02	exon	2	FALSE	F37E3.1	chrI	6422010	+	57	1.48	98	-1
UTGB	GTSSWA200395.03	exon	3	TRUE	F37E3.1	chrI	6422021	+	383	2.126	87	-1
UTGB	GTSSWA200395.04	exon	4	FALSE	F37E3.1	chrI	6422051	+	55	12.79	57	-1
UTGB	GTSSWA200396.01	exon	1	TRUE	F37E3.3	chrI	6431587	-	16	0	59	-1
UTGB	GTSSWA200397.01	outron	1	FALSE	T23H2.2	chrI	6436045	+	34	7.956	108	82
UTGB	GTSSWA200397.02	outron	2	TRUE	T23H2.2	chrI	6436098	+	103	1.685	55	29
UTGB	GTSSWA200398.01	exon	1	TRUE	K06A5.4	chrI	6460948	+	65	0.9162	45	-1
UTGB	GTSSWA200398.02	exon	2	FALSE	K06A5.4	chrI	6460960	+	13	2.332	33	-1
UTGB	GTSSWA200398.03	exon	3	FALSE	K06A5.4	chrI	6460971	+	42	0.4847	22	-1
UTGB	GTSSWA200398.04	exon	4	FALSE	K06A5.4	chrI	6460974	+	32	2.783	19	-1
UTGB	GTSSWA200398.05	exon	5	FALSE	K06A5.4	chrI	6460981	+	27	1.923	12	-1
UTGB	GTSSWA200399.01	exon	1	TRUE	K06A5.3	chrI	6466829	+	62	0.4456	23	-1
UTGB	GTSSWA200400.01	exon	1	FALSE	K06A5.2	chrI	6468115	+	12	2.548	69	-1
UTGB	GTSSWA200400.02	exon	2	TRUE	K06A5.2	chrI	6468131	+	515	0.9396	53	-1
UTGB	GTSSWA200400.03	exon	3	FALSE	K06A5.2	chrI	6468134	+	18	0.6483	50	-1
UTGB	GTSSWA200401.01	outron	1	TRUE	K06A5.7.1	chrI	6472536	-	51	0.928	631	611
UTGB	GTSSWA200401.02	outron	2	FALSE	K06A5.7.1	chrI	6471964	-	38	6.393	59	39
UTGB	GTSSWA200402.01	outron	1	TRUE	C55B7.9.1	chrI	6493890	-	25	12.59	56	40
UTGB	GTSSWA200402.02	outron	2	FALSE	C55B7.9.1	chrI	6493864	-	13	0	30	14
UTGB	GTSSWA200403.01	outron	1	TRUE	C55B7.5	chrI	6494203	+	11	4.581	128	89
UTGB	GTSSWA200403.02	outron	2	FALSE	C55B7.5	chrI	6494281	+	11	0	50	11
UTGB	GTSSWA200404.01	exon	1	FALSE	C55B7.4a	chrI	6497431	+	28	0	24	-1
UTGB	GTSSWA200404.02	exon	2	FALSE	C55B7.4a	chrI	6497436	+	556	1.031	19	-1
UTGB	GTSSWA200404.03	exon	3	TRUE	C55B7.4a	chrI	6497440	+	19377	0.5977	15	-1
UTGB	GTSSWA200404.04	exon	4	FALSE	C55B7.4a	chrI	6497443	+	58	2.342	12	-1
UTGB	GTSSWA200404.05	exon	5	FALSE	C55B7.4a	chrI	6497452	+	24	1.511	3	-1
UTGB	GTSSWA200405.01	outron	1	FALSE	C55B7.3	chrI	6499968	+	13	1.334	64	63
UTGB	GTSSWA200405.02	outron	2	TRUE	C55B7.3	chrI	6499973	+	22	0	59	58
UTGB	GTSSWA200406.01	outron	1	TRUE	C55B7.11	chrI	6513843	-	20	0	193	191
UTGB	GTSSWA200407.01	exon	1	FALSE	C55B7.1.1	chrI	6513929	+	13	3.483	93	-1
UTGB	GTSSWA200407.02	exon	2	FALSE	C55B7.1.1	chrI	6513945	+	12	0.8493	77	-1
UTGB	GTSSWA200407.03	exon	3	FALSE	C55B7.1.1	chrI	6513952	+	49	0.5961	70	-1
UTGB	GTSSWA200407.04	exon	4	TRUE	C55B7.1.1	chrI	6513964	+	792	3.027	58	-1
UTGB	GTSSWA200407.05	exon	5	FALSE	C55B7.1.1	chrI	6513983	+	46	2.77	39	-1
UTGB	GTSSWA200407.06	exon	6	FALSE	C55B7.1.1	chrI	6514000	+	27	1.198	22	-1
UTGB	GTSSWA200408.01	exon	1	TRUE	T10E9.4.1	chrI	6525046	+	275	0.5447	663	-1
UTGB	GTSSWA200408.02	exon	2	FALSE	T10E9.4.1	chrI	6525050	+	162	0.8488	659	-1
UTGB	GTSSWA200409.01	exon	1	TRUE	T10E9.6	chrI	6530097	-	23	3.858	41	-1
UTGB	GTSSWA200410.01	outron	1	TRUE	T10E9.7a	chrI	6533032	-	31	7.064	63	53
UTGB	GTSSWA200410.02	outron	2	FALSE	T10E9.7a	chrI	6533007	-	18	3.689	38	28
UTGB	GTSSWA200410.03	outron	3	FALSE	T10E9.7a	chrI	6532992	-	10	4.357	23	13
UTGB	GTSSWA200411.01	exon	1	FALSE	T10E9.3	chrI	6534073	+	24	0.6006	45	-1
UTGB	GTSSWA200411.02	exon	2	FALSE	T10E9.3	chrI	6534081	+	13	0	37	-1
UTGB	GTSSWA200411.03	exon	3	FALSE	T10E9.3	chrI	6534085	+	41	0.5634	33	-1
UTGB	GTSSWA200411.04	exon	4	TRUE	T10E9.3	chrI	6534102	+	63	0.864	16	-1
UTGB	GTSSWA200412.01	exon	1	FALSE	T10E9.2	chrI	6542107	+	369	5.119	62	-1
UTGB	GTSSWA200412.02	exon	2	TRUE	T10E9.2	chrI	6542143	+	487	5.204	26	-1
UTGB	GTSSWA200413.01	outron	1	TRUE	T10E9.9	chrI	6548657	-	55	1.051	272	80
UTGB	GTSSWA200414.01	outron	1	TRUE	F57B10.8	chrI	6550510	-	15	3.738	158	111
UTGB	GTSSWA200415.01	exon	1	TRUE	F57B10.7	chrI	6554737	+	162	11.81	165	-1
UTGB	GTSSWA200415.02	exon	2	FALSE	F57B10.7	chrI	6554840	+	23	0	62	-1
UTGB	GTSSWA200415.03	exon	3	FALSE	F57B10.7	chrI	6554863	+	20	0	39	-1
UTGB	GTSSWA200416.01	outron	1	FALSE	F57B10.6	chrI	6558336	+	11	0.9082	365	363
UTGB	GTSSWA200416.02	outron	2	TRUE	F57B10.6	chrI	6558362	+	12	5.637	339	337
UTGB	GTSSWA200417.01	outron	1	TRUE	F57B10.5	chrI	6562565	+	18	0	143	135
UTGB	GTSSWA200417.02	outron	2	FALSE	F57B10.5	chrI	6562604	+	16	3.42	104	96
UTGB	GTSSWA200417.03	outron	3	FALSE	F57B10.5	chrI	6562610	+	12	1.511	98	90
UTGB	GTSSWA200417.04	outron	4	FALSE	F57B10.5	chrI	6562623	+	12	0	85	77
UTGB	GTSSWA200418.01	outron	1	TRUE	F57B10.11	chrI	6564552	-	12	0	101	99
UTGB	GTSSWA200419.01	exon	1	TRUE	F57B10.3a	chrI	6569514	+	53	1.028	96	-1
UTGB	GTSSWA200419.02	exon	2	FALSE	F57B10.3a	chrI	6569518	+	10	0	92	-1
UTGB	GTSSWA200419.03	exon	3	FALSE	F57B10.3a	chrI	6569532	+	44	12.02	78	-1
UTGB	GTSSWA200420.01	outron	1	TRUE	F57B10.1.1	chrI	6580048	+	49	9.852	191	139
UTGB	GTSSWA200421.01	exon	1	TRUE	F48A9.3	chrI	6585283	+	52	0	22	-1
UTGB	GTSSWA200422.01	exon	1	TRUE	F48A9.1	chrI	6594322	+	27	2.653	120	-1
UTGB	GTSSWA200423.01	exon	1	TRUE	D2092.4	chrI	6615954	-	501	5.302	69	-1
UTGB	GTSSWA200423.02	exon	2	FALSE	D2092.4	chrI	6615924	-	85	8.493	39	-1
UTGB	GTSSWA200424.01	exon	1	TRUE	D2092.7	chrI	6616290	+	17	0	15	-1
UTGB	GTSSWA200425.01	exon	1	TRUE	D2092.8	chrI	6620666	+	11	0	77	-1
UTGB	GTSSWA200426.01	outron	1	TRUE	D2092.2.1	chrI	6626881	-	12	4.442	99	91
UTGB	GTSSWA200427.01	exon	1	TRUE	D2092.10	chrI	6629733	-	12	1.45	1817	-1
UTGB	GTSSWA200428.01	exon	1	TRUE	ZC581.7	chrI	6662315	-	10	0	26	-1
UTGB	GTSSWA200429.01	exon	1	TRUE	C17F3.3	chrI	6682292	+	64	0	77	-1
UTGB	GTSSWA200430.01	exon	1	TRUE	T23B3.5	chrI	6706421	-	177	0.4097	61	-1
UTGB	GTSSWA200431.01	exon	1	TRUE	T23B3.6	chrI	6708662	-	13	0	31	-1
UTGB	GTSSWA200432.01	outron	1	FALSE	T23B3.1	chrI	6717371	+	15	1.784	459	451
UTGB	GTSSWA200432.02	outron	2	TRUE	T23B3.1	chrI	6717718	+	36	0	112	104
UTGB	GTSSWA200433.01	outron	1	TRUE	W02D3.8	chrI	6736225	-	17	0	71	62
UTGB	GTSSWA200434.01	exon	1	TRUE	W02D3.2	chrI	6737524	+	22	0	10	-1
UTGB	GTSSWA200435.01	outron	1	TRUE	W02D3.11b	chrI	6756504	-	12	0.8493	156	154
UTGB	GTSSWA200436.01	outron	1	TRUE	F08B6.1	chrI	6760391	+	25	0	42	26
UTGB	GTSSWA200437.01	exon	1	FALSE	C37A2.3	chrI	6784176	+	48	9.945	733	-1
UTGB	GTSSWA200437.02	exon	2	FALSE	C37A2.3	chrI	6784255	+	16	1.401	654	-1
UTGB	GTSSWA200437.03	exon	3	TRUE	C37A2.3	chrI	6784856	+	66	1.416	53	-1
UTGB	GTSSWA200438.01	outron	1	FALSE	C37A2.7.1	chrI	6790073	-	10	1.497	335	333
UTGB	GTSSWA200438.02	outron	2	TRUE	C37A2.7.1	chrI	6790054	-	46	2.14	316	314
UTGB	GTSSWA200438.03	outron	3	FALSE	C37A2.7.1	chrI	6790044	-	20	1.477	306	304
UTGB	GTSSWA200438.04	outron	4	FALSE	C37A2.7.1	chrI	6790036	-	15	0	298	296
UTGB	GTSSWA200439.01	outron	1	TRUE	C37A2.2	chrI	6790544	+	11	0	482	447
UTGB	GTSSWA200440.01	exon	1	TRUE	C37A2.8b	chrI	6799621	-	230	15.25	42	-1
UTGB	GTSSWA200441.01	outron	1	FALSE	E02D9.1c	chrI	6799705	+	19	2.448	720	682
UTGB	GTSSWA200441.02	outron	2	FALSE	E02D9.1c	chrI	6799721	+	14	0	704	666
UTGB	GTSSWA200441.03	outron	3	FALSE	E02D9.1c	chrI	6799729	+	13	0	696	658
UTGB	GTSSWA200441.04	outron	4	FALSE	E02D9.1c	chrI	6799739	+	16	4.34	686	648
UTGB	GTSSWA200441.05	outron	5	TRUE	E02D9.1c	chrI	6799750	+	99	0.8623	675	637
UTGB	GTSSWA200441.06	outron	6	FALSE	E02D9.1c	chrI	6799791	+	27	4.103	634	596
UTGB	GTSSWA200441.07	outron	7	FALSE	E02D9.1c	chrI	6799823	+	16	0	602	564
UTGB	GTSSWA200442.01	outron	1	TRUE	K02F2.2.1	chrI	6835504	+	283	0.3676	980	964
UTGB	GTSSWA200442.02	outron	2	FALSE	K02F2.2.1	chrI	6835507	+	39	0.5168	977	961
UTGB	GTSSWA200443.01	exon	1	TRUE	K02F2.1b	chrI	6837976	+	13	11.57	377	-1
UTGB	GTSSWA200444.01	exon	1	FALSE	H27M09.5	chrI	6847304	-	29	1.036	352	-1
UTGB	GTSSWA200444.02	exon	2	TRUE	H27M09.5	chrI	6847302	-	5054	0.3441	350	-1
UTGB	GTSSWA200444.03	exon	3	FALSE	H27M09.5	chrI	6847301	-	43	1.179	349	-1
UTGB	GTSSWA200445.01	outron	1	FALSE	H27M09.3	chrI	6847515	+	26	1.162	78	70
UTGB	GTSSWA200445.02	outron	2	TRUE	H27M09.3	chrI	6847531	+	42	1.358	62	54
UTGB	GTSSWA200445.03	outron	3	FALSE	H27M09.3	chrI	6847539	+	18	0	54	46
UTGB	GTSSWA200445.04	outron	4	FALSE	H27M09.3	chrI	6847557	+	27	0	36	28
UTGB	GTSSWA200445.05	outron	5	FALSE	H27M09.3	chrI	6847564	+	14	0	29	21
UTGB	GTSSWA200446.01	exon	1	TRUE	T21G5.3	chrI	6854755	+	1915	11.6	56	-1
UTGB	GTSSWA200447.01	exon	1	FALSE	T21G5.4	chrI	6873757	-	19	2.12	73	-1
UTGB	GTSSWA200447.02	exon	2	TRUE	T21G5.4	chrI	6873754	-	43	1.459	70	-1
UTGB	GTSSWA200448.01	exon	1	TRUE	T21G5.1	chrI	6874302	+	37	0.9571	75	-1
UTGB	GTSSWA200449.01	exon	1	TRUE	C48B6.4	chrI	6889209	+	269	1.227	44	-1
UTGB	GTSSWA200450.01	exon	1	TRUE	C48B6.5	chrI	6901328	-	21	0	709	-1
UTGB	GTSSWA200451.01	outron	1	TRUE	C48B6.6a	chrI	6914102	-	14	0	551	523
UTGB	GTSSWA200452.01	outron	1	FALSE	C48B6.3.1	chrI	6914211	+	18	0.9223	847	837
UTGB	GTSSWA200452.02	outron	2	TRUE	C48B6.3.1	chrI	6914231	+	20	0	827	817
UTGB	GTSSWA200453.01	outron	1	TRUE	T10B11.6	chrI	6946108	-	10	1.699	750	750
UTGB	GTSSWA200454.01	outron	1	TRUE	T10B11.7a	chrI	6950707	-	55	0.703	249	208
UTGB	GTSSWA200454.02	outron	2	FALSE	T10B11.7a	chrI	6950698	-	18	0	240	199
UTGB	GTSSWA200454.03	outron	3	FALSE	T10B11.7a	chrI	6950692	-	37	2.358	234	193
UTGB	GTSSWA200454.04	outron	4	FALSE	T10B11.7a	chrI	6950540	-	38	0.818	82	41
UTGB	GTSSWA200455.01	exon	1	TRUE	T10B11.8	chrI	6954218	-	36	0	65	-1
UTGB	GTSSWA200455.02	exon	2	FALSE	T10B11.8	chrI	6954212	-	15	1.349	59	-1
UTGB	GTSSWA200456.01	outron	1	FALSE	C30F12.2.1	chrI	6970252	-	11	1.593	112	107
UTGB	GTSSWA200456.02	outron	2	TRUE	C30F12.2.1	chrI	6970225	-	32	1.038	85	80
UTGB	GTSSWA200456.03	outron	3	FALSE	C30F12.2.1	chrI	6970186	-	17	3.215	46	41
UTGB	GTSSWA200457.01	exon	1	FALSE	C30F12.4	chrI	6973740	-	31	4.954	71	-1
UTGB	GTSSWA200457.02	exon	2	FALSE	C30F12.4	chrI	6973716	-	63	3.382	47	-1
UTGB	GTSSWA200457.03	exon	3	TRUE	C30F12.4	chrI	6973708	-	207	1.735	39	-1
UTGB	GTSSWA200458.01	exon	1	FALSE	C30F12.5	chrI	6999603	-	16	0	80	-1
UTGB	GTSSWA200458.02	exon	2	FALSE	C30F12.5	chrI	6999596	-	12	0	73	-1
UTGB	GTSSWA200458.03	exon	3	FALSE	C30F12.5	chrI	6999587	-	30	3.005	64	-1
UTGB	GTSSWA200458.04	exon	4	FALSE	C30F12.5	chrI	6999579	-	23	0.5724	56	-1
UTGB	GTSSWA200458.05	exon	5	TRUE	C30F12.5	chrI	6999570	-	36	2.013	47	-1
UTGB	GTSSWA200459.01	exon	1	FALSE	H06O01.3	chrI	7005697	+	30	0.6444	22	-1
UTGB	GTSSWA200459.02	exon	2	TRUE	H06O01.3	chrI	7005702	+	143	0.5042	17	-1
UTGB	GTSSWA200459.03	exon	3	FALSE	H06O01.3	chrI	7005706	+	44	0.5809	13	-1
UTGB	GTSSWA200460.01	outron	1	FALSE	H06O01.1.1	chrI	7021465	-	10	0	678	675
UTGB	GTSSWA200460.02	outron	2	FALSE	H06O01.1.1	chrI	7021420	-	14	1.699	633	630
UTGB	GTSSWA200460.03	outron	3	FALSE	H06O01.1.1	chrI	7021410	-	14	0	623	620
UTGB	GTSSWA200460.04	outron	4	FALSE	H06O01.1.1	chrI	7021360	-	21	0	573	570
UTGB	GTSSWA200460.05	outron	5	FALSE	H06O01.1.1	chrI	7020968	-	33	2.198	181	178
UTGB	GTSSWA200460.06	outron	6	TRUE	H06O01.1.1	chrI	7020940	-	43	10.95	153	150
UTGB	GTSSWA200461.01	outron	1	TRUE	F15C11.2a	chrI	7021094	+	19	0	887	887
UTGB	GTSSWA200462.01	exon	1	TRUE	W01A8.8	chrI	7054903	-	45	0.6346	132	-1
UTGB	GTSSWA200463.01	outron	1	FALSE	W01A8.2	chrI	7056577	-	11	0	257	219
UTGB	GTSSWA200463.02	outron	2	TRUE	W01A8.2	chrI	7056381	-	25	4.302	61	23
UTGB	GTSSWA200464.01	outron	1	TRUE	W01A8.1b.2	chrI	7056510	+	11	0	697	689
UTGB	GTSSWA200465.01	exon	1	TRUE	F22D6.1	chrI	7079481	-	55	0	43	-1
UTGB	GTSSWA200465.02	exon	2	FALSE	F22D6.1	chrI	7079475	-	11	0	37	-1
UTGB	GTSSWA200465.03	exon	3	FALSE	F22D6.1	chrI	7079471	-	13	0.7234	33	-1
UTGB	GTSSWA200466.01	outron	1	TRUE	F22D6.2.1	chrI	7082019	-	19	7.406	519	499
UTGB	GTSSWA200466.02	outron	2	FALSE	F22D6.2.1	chrI	7081845	-	10	0.8493	345	325
UTGB	GTSSWA200466.03	outron	3	FALSE	F22D6.2.1	chrI	7081826	-	12	2.267	326	306
UTGB	GTSSWA200467.01	outron	1	FALSE	F22D6.3a.1	chrI	7090262	-	18	0	205	200
UTGB	GTSSWA200467.02	outron	2	TRUE	F22D6.3a.1	chrI	7090241	-	22	1.743	184	179
UTGB	GTSSWA200467.03	outron	3	FALSE	F22D6.3a.1	chrI	7090223	-	15	0	166	161
UTGB	GTSSWA200468.01	outron	1	TRUE	F22D6.4.1	chrI	7088617	+	20	0	2124	2122
UTGB	GTSSWA200468.02	outron	2	FALSE	F22D6.4.1	chrI	7090564	+	14	0	177	175
UTGB	GTSSWA200469.01	outron	1	FALSE	F22D6.5	chrI	7094991	-	10	0	480	454
UTGB	GTSSWA200469.02	outron	2	TRUE	F22D6.5	chrI	7094964	-	21	0	453	427
UTGB	GTSSWA200470.01	outron	1	TRUE	F22D6.8	chrI	7099675	-	18	0	271	178
UTGB	GTSSWA200471.01	exon	1	FALSE	F22D6.9	chrI	7099809	+	18	0.6248	208	-1
UTGB	GTSSWA200471.02	exon	2	TRUE	F22D6.9	chrI	7099988	+	52	0	29	-1
UTGB	GTSSWA200472.01	exon	1	FALSE	F22D6.15	chrI	7103381	-	36	1.25	27	-1
UTGB	GTSSWA200472.02	exon	2	TRUE	F22D6.15	chrI	7103362	-	40	0	8	-1
UTGB	GTSSWA200473.01	outron	1	TRUE	F22D6.10	chrI	7105302	+	777	1.677	16	15
UTGB	GTSSWA200474.01	exon	1	TRUE	K10D3.6	chrI	7116705	-	29	0	50	-1
UTGB	GTSSWA200474.02	exon	2	FALSE	K10D3.6	chrI	7116697	-	26	0	42	-1
UTGB	GTSSWA200475.01	exon	1	TRUE	K10D3.2	chrI	7128259	-	62	0.4788	122	-1
UTGB	GTSSWA200476.01	exon	1	FALSE	K10D3.4	chrI	7139905	-	14	2.836	234	-1
UTGB	GTSSWA200476.02	exon	2	TRUE	K10D3.4	chrI	7139899	-	88	1.002	228	-1
UTGB	GTSSWA200476.03	exon	3	FALSE	K10D3.4	chrI	7139728	-	15	0	57	-1
UTGB	GTSSWA200477.01	outron	1	TRUE	K07G5.6.1	chrI	7151885	-	21	1.356	71	44
UTGB	GTSSWA200478.01	outron	1	TRUE	K07G5.5	chrI	7170001	+	16	0	23	22
UTGB	GTSSWA200479.01	outron	1	TRUE	M05B5.2	chrI	7174145	-	10	0	30	22
UTGB	GTSSWA200480.01	exon	1	FALSE	M05B5.4	chrI	7188493	+	34	0	44	-1
UTGB	GTSSWA200480.02	exon	2	FALSE	M05B5.4	chrI	7188510	+	11	2.725	27	-1
UTGB	GTSSWA200480.03	exon	3	FALSE	M05B5.4	chrI	7188513	+	16	0	24	-1
UTGB	GTSSWA200480.04	exon	4	TRUE	M05B5.4	chrI	7188527	+	50	0.466	10	-1
UTGB	GTSSWA200481.01	exon	1	TRUE	C01H6.1	chrI	7203529	-	28	0.7315	22	-1
UTGB	GTSSWA200482.01	outron	1	FALSE	C01H6.4	chrI	7210532	+	26	1.085	59	56
UTGB	GTSSWA200482.02	outron	2	FALSE	C01H6.4	chrI	7210538	+	21	0	53	50
UTGB	GTSSWA200482.03	outron	3	TRUE	C01H6.4	chrI	7210545	+	65	3.9	46	43
UTGB	GTSSWA200482.04	outron	4	FALSE	C01H6.4	chrI	7210560	+	54	3.459	31	28
UTGB	GTSSWA200483.01	outron	1	TRUE	C01H6.7	chrI	7224773	+	188	14.52	59	45
UTGB	GTSSWA200484.01	outron	1	FALSE	C01H6.9	chrI	7233156	-	11	0	37	36
UTGB	GTSSWA200484.02	outron	2	TRUE	C01H6.9	chrI	7233140	-	19	3.041	21	20
UTGB	GTSSWA200485.01	outron	1	FALSE	R06C7.2	chrI	7234786	-	10	0	286	101
UTGB	GTSSWA200485.02	outron	2	FALSE	R06C7.2	chrI	7234771	-	12	2.221	271	86
UTGB	GTSSWA200485.03	outron	3	TRUE	R06C7.2	chrI	7234765	-	43	0	265	80
UTGB	GTSSWA200486.01	outron	1	FALSE	R06C7.1	chrI	7234895	+	35	0	511	487
UTGB	GTSSWA200486.02	outron	2	TRUE	R06C7.1	chrI	7234909	+	62	0.4627	497	473
UTGB	GTSSWA200486.03	outron	3	FALSE	R06C7.1	chrI	7234916	+	19	2.909	490	466
UTGB	GTSSWA200486.04	outron	4	FALSE	R06C7.1	chrI	7234938	+	25	0.7804	468	444
UTGB	GTSSWA200486.05	outron	5	FALSE	R06C7.1	chrI	7234948	+	16	4.655	458	434
UTGB	GTSSWA200487.01	outron	1	TRUE	R06C7.3.1	chrI	7243816	-	29	0.5333	64	54
UTGB	GTSSWA200488.01	outron	1	FALSE	R06C7.4.3	chrI	7244035	+	10	0.9893	956	853
UTGB	GTSSWA200488.02	exon	2	TRUE	R06C7.4.3	chrI	7244956	+	134	5.018	35	-1
UTGB	GTSSWA200489.01	outron	1	FALSE	R06C7.7a.1	chrI	7251429	-	13	0.8042	614	614
UTGB	GTSSWA200489.02	outron	2	TRUE	R06C7.7a.1	chrI	7251297	-	77	0	482	482
UTGB	GTSSWA200490.01	outron	1	TRUE	R06C7.9b	chrI	7255410	+	12	2.637	115	99
UTGB	GTSSWA200491.01	exon	1	FALSE	R06C7.10.1	chrI	7267078	-	327	1.076	144	-1
UTGB	GTSSWA200491.02	exon	2	TRUE	R06C7.10.1	chrI	7267072	-	858	0.653	138	-1
UTGB	GTSSWA200491.03	exon	3	FALSE	R06C7.10.1	chrI	7267069	-	83	0.5719	135	-1
UTGB	GTSSWA200491.04	exon	4	FALSE	R06C7.10.1	chrI	7267057	-	34	1.278	123	-1
UTGB	GTSSWA200491.05	exon	5	FALSE	R06C7.10.1	chrI	7267052	-	80	3.677	118	-1
UTGB	GTSSWA200491.06	exon	6	FALSE	R06C7.10.1	chrI	7267047	-	65	0.4415	113	-1
UTGB	GTSSWA200491.07	exon	7	FALSE	R06C7.10.1	chrI	7266981	-	12	0.7557	47	-1
UTGB	GTSSWA200491.08	exon	8	FALSE	R06C7.10.1	chrI	7266938	-	16	14.06	4	-1
UTGB	GTSSWA200492.01	exon	1	TRUE	F21C3.7	chrI	7279623	-	27	1.04	15	-1
UTGB	GTSSWA200493.01	exon	1	TRUE	F21C3.5	chrI	7283784	-	1430	7.029	45	-1
UTGB	GTSSWA200494.01	exon	1	TRUE	F21C3.6	chrI	7285781	-	19	0.6586	20	-1
UTGB	GTSSWA200495.01	exon	1	TRUE	F13G3.12	chrI	7295758	+	15	0	25	-1
UTGB	GTSSWA200495.02	exon	2	FALSE	F13G3.12	chrI	7295765	+	10	2.368	18	-1
UTGB	GTSSWA200496.01	exon	1	TRUE	F13G3.3	chrI	7300324	-	17	0	363	-1
UTGB	GTSSWA200497.01	outron	1	TRUE	F13G3.6	chrI	7304780	-	13	19.39	94	91
UTGB	GTSSWA200498.01	outron	1	TRUE	F13G3.7b.1	chrI	7304900	+	47	0	240	151
UTGB	GTSSWA200498.02	outron	2	FALSE	F13G3.7b.1	chrI	7304910	+	25	2.341	230	141
UTGB	GTSSWA200498.03	outron	3	FALSE	F13G3.7b.1	chrI	7304916	+	32	1.155	224	135
UTGB	GTSSWA200498.04	outron	4	FALSE	F13G3.7b.1	chrI	7304921	+	37	0	219	130
UTGB	GTSSWA200499.01	outron	1	TRUE	F13G3.11	chrI	7306833	+	13	15.2	282	282
UTGB	GTSSWA200500.01	outron	1	FALSE	F13G3.10c	chrI	7314443	-	11	3.157	671	545
UTGB	GTSSWA200500.02	outron	2	FALSE	F13G3.10c	chrI	7314414	-	11	2.725	642	516
UTGB	GTSSWA200500.03	outron	3	FALSE	F13G3.10c	chrI	7314398	-	28	1.043	626	500
UTGB	GTSSWA200500.04	outron	4	TRUE	F13G3.10c	chrI	7314392	-	60	0.5429	620	494
UTGB	GTSSWA200500.05	outron	5	FALSE	F13G3.10c	chrI	7314386	-	20	0	614	488
UTGB	GTSSWA200500.06	outron	6	FALSE	F13G3.10c	chrI	7314103	-	28	1.219	331	205
UTGB	GTSSWA200500.07	outron	7	FALSE	F13G3.10c	chrI	7314076	-	25	2.623	304	178
UTGB	GTSSWA200500.08	outron	8	FALSE	F13G3.10c	chrI	7314038	-	12	9.76	266	140
UTGB	GTSSWA200501.01	exon	1	TRUE	F52A8.3a	chrI	7325138	-	15	0	1549	-1
UTGB	GTSSWA200501.02	exon	2	FALSE	F52A8.3a	chrI	7323623	-	14	0	34	-1
UTGB	GTSSWA200502.01	outron	1	FALSE	F52A8.5.1	chrI	7347372	-	41	0.5101	652	650
UTGB	GTSSWA200502.02	outron	2	TRUE	F52A8.5.1	chrI	7347363	-	58	0.5255	643	641
UTGB	GTSSWA200502.03	outron	3	FALSE	F52A8.5.1	chrI	7347357	-	29	0	637	635
UTGB	GTSSWA200502.04	outron	4	FALSE	F52A8.5.1	chrI	7346743	-	19	0	23	21
UTGB	GTSSWA200502.05	outron	5	FALSE	F52A8.5.1	chrI	7346735	-	13	0	15	13
UTGB	GTSSWA200503.01	outron	1	FALSE	F07A5.1b	chrI	7352229	-	18	2.488	157	144
UTGB	GTSSWA200503.02	outron	2	FALSE	F07A5.1b	chrI	7352117	-	21	0	45	32
UTGB	GTSSWA200503.03	outron	3	TRUE	F07A5.1b	chrI	7352107	-	24	3.853	35	22
UTGB	GTSSWA200504.01	exon	1	TRUE	F07A5.2	chrI	7352442	+	113	1.238	63	-1
UTGB	GTSSWA200505.01	outron	1	FALSE	F07A5.3	chrI	7354397	+	30	1.289	95	92
UTGB	GTSSWA200505.02	outron	2	TRUE	F07A5.3	chrI	7354408	+	39	0	84	81
UTGB	GTSSWA200506.01	exon	1	FALSE	F07A5.7.1	chrI	7383164	-	16	0	83	-1
UTGB	GTSSWA200506.02	exon	2	FALSE	F07A5.7.1	chrI	7383159	-	26	2.236	78	-1
UTGB	GTSSWA200506.03	exon	3	TRUE	F07A5.7.1	chrI	7383153	-	283	2.717	72	-1
UTGB	GTSSWA200506.04	exon	4	FALSE	F07A5.7.1	chrI	7383121	-	28	1.101	40	-1
UTGB	GTSSWA200506.05	exon	5	FALSE	F07A5.7.1	chrI	7383105	-	15	0	24	-1
UTGB	GTSSWA200506.06	exon	6	FALSE	F07A5.7.1	chrI	7383101	-	51	0.9288	20	-1
UTGB	GTSSWA200506.07	exon	7	FALSE	F07A5.7.1	chrI	7383097	-	13	2.033	16	-1
UTGB	GTSSWA200506.08	exon	8	FALSE	F07A5.7.1	chrI	7383089	-	97	2.564	8	-1
UTGB	GTSSWA200507.01	exon	1	TRUE	C15A11.5	chrI	7401674	+	434	1.797	20	-1
UTGB	GTSSWA200508.01	exon	1	TRUE	C15A11.6	chrI	7404369	-	361	1.819	19	-1
UTGB	GTSSWA200509.01	exon	1	FALSE	C15A11.7a	chrI	7405011	+	11	3.485	26	-1
UTGB	GTSSWA200509.02	exon	2	FALSE	C15A11.7a	chrI	7405028	+	100	0.5088	9	-1
UTGB	GTSSWA200509.03	exon	3	FALSE	C15A11.7a	chrI	7405032	+	13	0.8042	5	-1
UTGB	GTSSWA200509.04	exon	4	TRUE	C15A11.7a	chrI	7405033	+	269	0.4113	4	-1
UTGB	GTSSWA200510.01	exon	1	TRUE	ZK524.1	chrI	7454695	+	56	1.365	15	-1
UTGB	GTSSWA200511.01	exon	1	TRUE	T28F4.3	chrI	7486298	-	25	0.5919	261	-1
UTGB	GTSSWA200512.01	outron	1	FALSE	T28F4.5.1	chrI	7489793	+	23	0	2567	2539
UTGB	GTSSWA200512.02	outron	2	TRUE	T28F4.5.1	chrI	7492042	+	226	1.102	318	290
UTGB	GTSSWA200512.03	outron	3	FALSE	T28F4.5.1	chrI	7492047	+	13	0	313	285
UTGB	GTSSWA200512.04	exon	4	FALSE	T28F4.5.1	chrI	7492354	+	16	0	6	-1
UTGB	GTSSWA200513.01	outron	1	TRUE	T28F4.6	chrI	7494690	-	43	1.512	484	481
UTGB	GTSSWA200514.01	exon	1	FALSE	C26C6.6	chrI	7503365	+	14	0	2603	-1
UTGB	GTSSWA200514.02	exon	2	TRUE	C26C6.6	chrI	7505947	+	26	0	21	-1
UTGB	GTSSWA200515.01	exon	1	FALSE	C26C6.9	chrI	7515104	-	38	0.5437	38	-1
UTGB	GTSSWA200515.02	exon	2	FALSE	C26C6.9	chrI	7515090	-	49	0.4879	24	-1
UTGB	GTSSWA200515.03	exon	3	TRUE	C26C6.9	chrI	7515087	-	588	0.4158	21	-1
UTGB	GTSSWA200515.04	exon	4	FALSE	C26C6.9	chrI	7515083	-	21	2.222	17	-1
UTGB	GTSSWA200515.05	exon	5	FALSE	C26C6.9	chrI	7515075	-	33	0.5147	9	-1
UTGB	GTSSWA200515.06	exon	6	FALSE	C26C6.9	chrI	7515067	-	15	2.006	1	-1
UTGB	GTSSWA200516.01	outron	1	FALSE	C26C6.5a	chrI	7542166	-	11	0	159	13
UTGB	GTSSWA200516.02	exon	2	TRUE	C26C6.5a	chrI	7542071	-	12	0	64	-1
UTGB	GTSSWA200517.01	outron	1	FALSE	T25G3.2.2	chrI	7554827	+	26	0	169	60
UTGB	GTSSWA200517.02	outron	2	FALSE	T25G3.2.2	chrI	7554850	+	106	0.7528	146	37
UTGB	GTSSWA200517.03	outron	3	FALSE	T25G3.2.2	chrI	7554856	+	90	1.337	140	31
UTGB	GTSSWA200517.04	outron	4	FALSE	T25G3.2.2	chrI	7554860	+	53	0	136	27
UTGB	GTSSWA200517.05	outron	5	FALSE	T25G3.2.2	chrI	7554868	+	49	0.9763	128	19
UTGB	GTSSWA200517.06	outron	6	FALSE	T25G3.2.2	chrI	7554874	+	105	1.549	122	13
UTGB	GTSSWA200517.07	exon	7	FALSE	T25G3.2.2	chrI	7554901	+	12	0	95	-1
UTGB	GTSSWA200517.08	exon	8	FALSE	T25G3.2.2	chrI	7554910	+	10	3.756	86	-1
UTGB	GTSSWA200517.09	exon	9	FALSE	T25G3.2.2	chrI	7554962	+	16	0.714	34	-1
UTGB	GTSSWA200517.10	exon	10	TRUE	T25G3.2.2	chrI	7554972	+	148	0.8095	24	-1
UTGB	GTSSWA200518.01	outron	1	TRUE	T25G3.4	chrI	7564562	+	13	1.73	19	17
UTGB	GTSSWA200519.01	outron	1	TRUE	D2030.1.1	chrI	7571841	-	15	2.216	1526	1292
UTGB	GTSSWA200520.01	outron	1	FALSE	D2030.2a.1	chrI	7571408	+	10	0	2866	2863
UTGB	GTSSWA200520.02	outron	2	FALSE	D2030.2a.1	chrI	7574183	+	12	0	91	88
UTGB	GTSSWA200520.03	outron	3	FALSE	D2030.2a.1	chrI	7574210	+	20	1.273	64	61
UTGB	GTSSWA200520.04	outron	4	FALSE	D2030.2a.1	chrI	7574214	+	18	0	60	57
UTGB	GTSSWA200520.05	outron	5	TRUE	D2030.2a.1	chrI	7574222	+	25	15.44	52	49
UTGB	GTSSWA200521.01	outron	1	TRUE	D2030.4.1	chrI	7581847	-	24	0.8493	228	223
UTGB	GTSSWA200522.01	outron	1	FALSE	D2030.6.1	chrI	7588548	-	27	0	191	185
UTGB	GTSSWA200522.02	outron	2	FALSE	D2030.6.1	chrI	7588526	-	22	3.176	169	163
UTGB	GTSSWA200522.03	outron	3	TRUE	D2030.6.1	chrI	7588507	-	27	9.286	150	144
UTGB	GTSSWA200523.01	exon	1	TRUE	D2030.7	chrI	7586491	+	215	0	2226	-1
UTGB	GTSSWA200523.02	exon	2	FALSE	D2030.7	chrI	7588655	+	130	6.874	62	-1
UTGB	GTSSWA200523.03	exon	3	FALSE	D2030.7	chrI	7588678	+	98	3.741	39	-1
UTGB	GTSSWA200523.04	exon	4	FALSE	D2030.7	chrI	7588693	+	39	2.332	24	-1
UTGB	GTSSWA200524.01	exon	1	FALSE	D2030.10b	chrI	7602302	+	27	0	17	-1
UTGB	GTSSWA200524.02	exon	2	TRUE	D2030.10b	chrI	7602306	+	49	0	13	-1
UTGB	GTSSWA200525.01	exon	1	FALSE	F26A3.2	chrI	7643292	-	17	0	55	-1
UTGB	GTSSWA200525.02	exon	2	FALSE	F26A3.2	chrI	7643279	-	10	0	42	-1
UTGB	GTSSWA200525.03	exon	3	TRUE	F26A3.2	chrI	7643263	-	69	3.579	26	-1
UTGB	GTSSWA200525.04	exon	4	FALSE	F26A3.2	chrI	7643244	-	14	5.631	7	-1
UTGB	GTSSWA200526.01	outron	1	FALSE	F26A3.4.1	chrI	7659738	-	10	1.699	1463	1451
UTGB	GTSSWA200526.02	outron	2	TRUE	F26A3.4.1	chrI	7659130	-	92	0.8287	855	843
UTGB	GTSSWA200527.01	outron	1	TRUE	F26A3.7	chrI	7676272	-	21	0	156	154
UTGB	GTSSWA200527.02	outron	2	FALSE	F26A3.7	chrI	7676217	-	13	0	101	99
UTGB	GTSSWA200528.01	outron	1	TRUE	T23G11.3	chrI	7695445	+	20	15.49	246	231
UTGB	GTSSWA200529.01	exon	1	FALSE	T23G11.10	chrI	7697412	+	34	3.582	884	-1
UTGB	GTSSWA200529.02	exon	2	FALSE	T23G11.10	chrI	7697433	+	16	2.524	863	-1
UTGB	GTSSWA200529.03	exon	3	FALSE	T23G11.10	chrI	7697475	+	28	17.24	821	-1
UTGB	GTSSWA200529.04	exon	4	FALSE	T23G11.10	chrI	7697486	+	18	4.679	810	-1
UTGB	GTSSWA200529.05	exon	5	FALSE	T23G11.10	chrI	7697489	+	18	0.6248	807	-1
UTGB	GTSSWA200529.06	exon	6	FALSE	T23G11.10	chrI	7697536	+	86	5.704	760	-1
UTGB	GTSSWA200529.07	exon	7	FALSE	T23G11.10	chrI	7697589	+	41	5.477	707	-1
UTGB	GTSSWA200529.08	exon	8	FALSE	T23G11.10	chrI	7697638	+	13	16.86	658	-1
UTGB	GTSSWA200529.09	exon	9	TRUE	T23G11.10	chrI	7697771	+	327	3.963	525	-1
UTGB	GTSSWA200529.10	exon	10	FALSE	T23G11.10	chrI	7697880	+	245	17.87	416	-1
UTGB	GTSSWA200530.01	outron	1	FALSE	T23G11.2	chrI	7699463	+	12	0	218	178
UTGB	GTSSWA200530.02	outron	2	FALSE	T23G11.2	chrI	7699615	+	14	2.548	66	26
UTGB	GTSSWA200530.03	exon	3	TRUE	T23G11.2	chrI	7699659	+	1059	5.352	22	-1
UTGB	GTSSWA200531.01	exon	1	FALSE	T23G11.1	chrI	7702036	-	11	0	71	-1
UTGB	GTSSWA200531.02	exon	2	TRUE	T23G11.1	chrI	7702030	-	175	1.296	65	-1
UTGB	GTSSWA200532.01	outron	1	FALSE	F27D4.1	chrI	7701109	+	10	0	1320	1315
UTGB	GTSSWA200532.02	outron	2	FALSE	F27D4.1	chrI	7701117	+	16	0.714	1312	1307
UTGB	GTSSWA200532.03	outron	3	TRUE	F27D4.1	chrI	7701125	+	33	1.128	1304	1299
UTGB	GTSSWA200532.04	outron	4	FALSE	F27D4.1	chrI	7701129	+	26	0	1300	1295
UTGB	GTSSWA200532.05	outron	5	FALSE	F27D4.1	chrI	7701141	+	12	0	1288	1283
UTGB	GTSSWA200532.06	outron	6	FALSE	F27D4.1	chrI	7702306	+	10	0.8493	123	118
UTGB	GTSSWA200533.01	outron	1	FALSE	F27D4.7	chrI	7726902	-	16	0	2252	2250
UTGB	GTSSWA200533.02	outron	2	FALSE	F27D4.7	chrI	7726879	-	21	0	2229	2227
UTGB	GTSSWA200533.03	outron	3	FALSE	F27D4.7	chrI	7724739	-	45	12.06	89	87
UTGB	GTSSWA200533.04	outron	4	TRUE	F27D4.7	chrI	7724718	-	92	3.296	68	66
UTGB	GTSSWA200533.05	outron	5	FALSE	F27D4.7	chrI	7724700	-	35	1.014	50	48
UTGB	GTSSWA200534.01	outron	1	TRUE	F27D4.4a.1	chrI	7724821	+	16	0.6556	203	193
UTGB	GTSSWA200534.02	outron	2	FALSE	F27D4.4a.1	chrI	7724841	+	11	0	183	173
UTGB	GTSSWA200535.01	outron	1	TRUE	F27D4.5	chrI	7727237	+	27	0	25	25
UTGB	GTSSWA200536.01	outron	1	TRUE	F27D4.6a.1	chrI	7731116	+	12	6.624	69	54
UTGB	GTSSWA200537.01	outron	1	FALSE	F58H10.1	chrI	7755729	+	12	0	48	31
UTGB	GTSSWA200537.02	outron	2	TRUE	F58H10.1	chrI	7755746	+	15	0	31	14
UTGB	GTSSWA200538.01	outron	1	FALSE	H15N14.1g	chrI	7772753	+	11	0.9082	679	659
UTGB	GTSSWA200538.02	outron	2	TRUE	H15N14.1g	chrI	7772757	+	95	0.8666	675	655
UTGB	GTSSWA200538.03	outron	3	FALSE	H15N14.1g	chrI	7772779	+	34	2.079	653	633
UTGB	GTSSWA200538.04	outron	4	FALSE	H15N14.1g	chrI	7772809	+	10	2.548	623	603
UTGB	GTSSWA200539.01	outron	1	FALSE	D2005.4.1	chrI	7814992	+	21	14.49	270	250
UTGB	GTSSWA200539.02	outron	2	FALSE	D2005.4.1	chrI	7815006	+	12	2.889	256	236
UTGB	GTSSWA200539.03	outron	3	TRUE	D2005.4.1	chrI	7815017	+	26	2.17	245	225
UTGB	GTSSWA200540.01	exon	1	TRUE	F30F8.1	chrI	7835403	-	112	19.23	67	-1
UTGB	GTSSWA200541.01	outron	1	TRUE	F30F8.3	chrI	7835710	+	65	0	111	98
UTGB	GTSSWA200542.01	exon	1	TRUE	F30F8.5a	chrI	7848869	-	103	1.632	21	-1
UTGB	GTSSWA200543.01	outron	1	FALSE	R11A5.2	chrI	7861535	-	25	0	2137	2123
UTGB	GTSSWA200543.02	outron	2	FALSE	R11A5.2	chrI	7861507	-	14	0	2109	2095
UTGB	GTSSWA200543.03	outron	3	TRUE	R11A5.2	chrI	7861497	-	40	0	2099	2085
UTGB	GTSSWA200543.04	outron	4	FALSE	R11A5.2	chrI	7861242	-	10	1.167	1844	1830
UTGB	GTSSWA200543.05	outron	5	FALSE	R11A5.2	chrI	7860873	-	11	0	1475	1461
UTGB	GTSSWA200543.06	outron	6	FALSE	R11A5.2	chrI	7860561	-	11	0	1163	1149
UTGB	GTSSWA200544.01	outron	1	TRUE	R11A5.3	chrI	7866327	-	15	0	2809	2690
UTGB	GTSSWA200544.02	exon	2	FALSE	R11A5.3	chrI	7863547	-	13	0	29	-1
UTGB	GTSSWA200545.01	exon	1	FALSE	R11A5.4b.1	chrI	7866324	+	47	1.971	71	-1
UTGB	GTSSWA200545.02	exon	2	FALSE	R11A5.4b.1	chrI	7866333	+	492	0.8035	62	-1
UTGB	GTSSWA200545.03	exon	3	FALSE	R11A5.4b.1	chrI	7866339	+	167	1.68	56	-1
UTGB	GTSSWA200545.04	exon	4	TRUE	R11A5.4b.1	chrI	7866350	+	2005	3.002	45	-1
UTGB	GTSSWA200546.01	outron	1	FALSE	F55D12.2	chrI	7889257	+	19	10.74	294	258
UTGB	GTSSWA200546.02	outron	2	FALSE	F55D12.2	chrI	7889341	+	13	0	210	174
UTGB	GTSSWA200546.03	outron	3	TRUE	F55D12.2	chrI	7889348	+	45	0.9074	203	167
UTGB	GTSSWA200546.04	outron	4	FALSE	F55D12.2	chrI	7889453	+	12	6.624	98	62
UTGB	GTSSWA200547.01	outron	1	TRUE	F20G4.1	chrI	7927045	-	92	16.64	713	712
UTGB	GTSSWA200547.02	outron	2	FALSE	F20G4.1	chrI	7926964	-	15	7.794	632	631
UTGB	GTSSWA200547.03	outron	3	FALSE	F20G4.1	chrI	7926942	-	20	4.961	610	609
UTGB	GTSSWA200547.04	outron	4	FALSE	F20G4.1	chrI	7926917	-	17	2.939	585	584
UTGB	GTSSWA200547.05	outron	5	FALSE	F20G4.1	chrI	7926914	-	10	2.095	582	581
UTGB	GTSSWA200547.06	outron	6	FALSE	F20G4.1	chrI	7926902	-	26	3.95	570	569
UTGB	GTSSWA200548.01	outron	1	TRUE	F20G4.3.1	chrI	7935759	-	35	14.45	1221	1187
UTGB	GTSSWA200548.02	outron	2	FALSE	F20G4.3.1	chrI	7935695	-	14	1.89	1157	1123
UTGB	GTSSWA200548.03	outron	3	FALSE	F20G4.3.1	chrI	7935690	-	10	0	1152	1118
UTGB	GTSSWA200548.04	outron	4	FALSE	F20G4.3.1	chrI	7935675	-	14	0	1137	1103
UTGB	GTSSWA200549.01	outron	1	FALSE	T22C1.1.1	chrI	7936206	+	10	3.397	54	52
UTGB	GTSSWA200549.02	outron	2	FALSE	T22C1.1.1	chrI	7936217	+	11	0	43	41
UTGB	GTSSWA200549.03	outron	3	FALSE	T22C1.1.1	chrI	7936233	+	11	0	27	25
UTGB	GTSSWA200549.04	outron	4	TRUE	T22C1.1.1	chrI	7936238	+	18	0	22	20
UTGB	GTSSWA200550.01	exon	1	FALSE	T22C1.4	chrI	7940773	-	25	0	81	-1
UTGB	GTSSWA200550.02	exon	2	FALSE	T22C1.4	chrI	7940761	-	24	1.201	69	-1
UTGB	GTSSWA200550.03	exon	3	FALSE	T22C1.4	chrI	7940755	-	17	0	63	-1
UTGB	GTSSWA200550.04	exon	4	FALSE	T22C1.4	chrI	7940742	-	32	4.074	50	-1
UTGB	GTSSWA200550.05	exon	5	TRUE	T22C1.4	chrI	7940735	-	59	2.755	43	-1
UTGB	GTSSWA200550.06	exon	6	FALSE	T22C1.4	chrI	7940721	-	11	6.871	29	-1
UTGB	GTSSWA200551.01	outron	1	TRUE	T22C1.5	chrI	7940161	+	10	1.699	898	750
UTGB	GTSSWA200552.01	outron	1	TRUE	T22C1.6	chrI	7942874	+	48	0.4904	61	42
UTGB	GTSSWA200552.02	outron	2	FALSE	T22C1.6	chrI	7942877	+	40	0	58	39
UTGB	GTSSWA200553.01	outron	1	FALSE	T22C1.7	chrI	7952451	-	10	0	912	863
UTGB	GTSSWA200553.02	outron	2	TRUE	T22C1.7	chrI	7952442	-	10	1.699	903	854
UTGB	GTSSWA200554.01	exon	1	TRUE	T22C1.8	chrI	7958439	-	52	0.5339	125	-1
UTGB	GTSSWA200555.01	exon	1	TRUE	T22C1.9	chrI	7958678	+	46	0	25	-1
UTGB	GTSSWA200556.01	exon	1	TRUE	H05L14.1	chrI	7977072	-	31	0	78	-1
UTGB	GTSSWA200557.01	exon	1	TRUE	C54G4.6	chrI	8022955	-	13	1.447	2093	-1
UTGB	GTSSWA200558.01	outron	1	TRUE	K04G2.1.1	chrI	8027938	-	18	0	181	151
UTGB	GTSSWA200559.01	outron	1	TRUE	K04G2.2	chrI	8028058	+	20	0.6901	2917	2895
UTGB	GTSSWA200559.02	outron	2	FALSE	K04G2.2	chrI	8028100	+	14	0	2875	2853
UTGB	GTSSWA200560.01	exon	1	TRUE	K04G2.4	chrI	8035880	+	16	0.8493	83	-1
UTGB	GTSSWA200561.01	outron	1	TRUE	K04G2.11	chrI	8040583	-	11	0	323	68
UTGB	GTSSWA200562.01	outron	1	TRUE	T28B8.1.1	chrI	8133880	+	290	0.6494	258	229
UTGB	GTSSWA200563.01	exon	1	FALSE	T28B8.2	chrI	8147482	+	31	1.622	17	-1
UTGB	GTSSWA200563.02	exon	2	TRUE	T28B8.2	chrI	8147483	+	144	0.4159	16	-1
UTGB	GTSSWA200563.03	exon	3	FALSE	T28B8.2	chrI	8147485	+	15	0	14	-1
UTGB	GTSSWA200563.04	exon	4	FALSE	T28B8.2	chrI	8147488	+	18	0.7852	11	-1
UTGB	GTSSWA200563.05	exon	5	FALSE	T28B8.2	chrI	8147491	+	10	0.9893	8	-1
UTGB	GTSSWA200564.01	exon	1	FALSE	T28B8.6	chrI	8150334	+	10	0	26	-1
UTGB	GTSSWA200564.02	exon	2	TRUE	T28B8.6	chrI	8150343	+	19	5.817	17	-1
UTGB	GTSSWA200565.01	exon	1	FALSE	T02E1.7	chrI	8210681	-	32	2.98	47	-1
UTGB	GTSSWA200565.02	exon	2	TRUE	T02E1.7	chrI	8210659	-	103	2.605	25	-1
UTGB	GTSSWA200566.01	outron	1	TRUE	T02E1.5b	chrI	8218442	-	47	1.65	161	124
UTGB	GTSSWA200567.01	outron	1	FALSE	T02E1.3a	chrI	8214279	+	11	0	124	96
UTGB	GTSSWA200567.02	outron	2	FALSE	T02E1.3a	chrI	8214287	+	10	0	116	88
UTGB	GTSSWA200567.03	outron	3	FALSE	T02E1.3a	chrI	8214296	+	17	1.365	107	79
UTGB	GTSSWA200567.04	outron	4	FALSE	T02E1.3a	chrI	8214309	+	26	0.8987	94	66
UTGB	GTSSWA200567.05	outron	5	FALSE	T02E1.3a	chrI	8214315	+	18	0	88	60
UTGB	GTSSWA200567.06	outron	6	TRUE	T02E1.3a	chrI	8214347	+	62	4.893	56	28
UTGB	GTSSWA200568.01	outron	1	TRUE	T02E1.2	chrI	8223032	-	20	0.7913	37	29
UTGB	GTSSWA200569.01	exon	1	TRUE	T02E1.1	chrI	8226290	-	30	0	37	-1
UTGB	GTSSWA200570.01	exon	1	TRUE	ZK265.3	chrI	8242116	+	56	0	17	-1
UTGB	GTSSWA200571.01	exon	1	TRUE	ZK265.2	chrI	8245615	-	7446	1.595	673	-1
UTGB	GTSSWA200571.02	exon	2	FALSE	ZK265.2	chrI	8244952	-	718	1.162	10	-1
UTGB	GTSSWA200572.01	outron	1	FALSE	ZK265.9	chrI	8255162	-	10	0	248	242
UTGB	GTSSWA200572.02	outron	2	TRUE	ZK265.9	chrI	8254954	-	25	0	40	34
UTGB	GTSSWA200573.01	exon	1	FALSE	T01G9.3	chrI	8281974	+	12	0	84	-1
UTGB	GTSSWA200573.02	exon	2	FALSE	T01G9.3	chrI	8281979	+	12	0	79	-1
UTGB	GTSSWA200573.03	exon	3	TRUE	T01G9.3	chrI	8281984	+	23	0	74	-1
UTGB	GTSSWA200574.01	outron	1	TRUE	T01G9.6a.1	chrI	8291115	-	10	0	308	117
UTGB	GTSSWA200575.01	exon	1	TRUE	F52B5.7	chrI	8315336	-	42	2.895	25	-1
UTGB	GTSSWA200575.02	exon	2	FALSE	F52B5.7	chrI	8315330	-	22	1.241	19	-1
UTGB	GTSSWA200575.03	exon	3	FALSE	F52B5.7	chrI	8315324	-	22	3.428	13	-1
UTGB	GTSSWA200576.01	outron	1	TRUE	F52B5.3	chrI	8324047	-	48	7.013	71	67
UTGB	GTSSWA200577.01	exon	1	FALSE	C34B7.4	chrI	8333105	+	14	0.8493	85	-1
UTGB	GTSSWA200577.02	exon	2	FALSE	C34B7.4	chrI	8333108	+	14	1.467	82	-1
[truncated: 11,065 more rows]

## Sheet: genes with both type of TSSs
URL	ID	Representative TSS type	common gene name	gene name	chr	start position	strand	number of aligned reads in the best-fit Gaussian distribution	standard deviation of the best-fit Gaussian distribution	distance to the start codon	distance to the proximal SL1 site	other gene names (or overlapped genes)
[truncated: 92 more rows]
