# Supplementary material for: The transcription start site landscape of C. elegans
Source: HighWire-hosted journal article supplement (doi:10.1101/gr.151571.112), 2013-05-01
Supplement: Supplemental_Table_S4.xlsx [file Supplemental_Table_S4.xlsx]

## Sheet: bidirectional promoter
url	R: gene in reverse strand	F: gene in forward strand	TSS distance	chr	start	end	expression level of R	expression level of F		correlation coefficient
UTGB	Y35H6.3	Y35H6.1	100	chrX	34089	35089	34	22		0.0659994
UTGB	F13C5.3a	F13C5.1	61	chrX	599023	600023	28	32
UTGB	T04G9.5.1	T04G9.3	188	chrX	767763	768763	143	76
UTGB	T04G9.6	T04G9.1	144	chrX	787537	788537	13	22
UTGB	F56F10.4	F56F10.1.1	159	chrX	870656	871656	709	46
UTGB	F55A4.5	F55A4.1	90	chrX	1034788	1035788	162	17
UTGB	ZK380.4	ZK380.1	108	chrX	1654708	1655708	28	23
UTGB	ZC53.1	ZC53.7	110	chrX	1914699	1915699	21	49
UTGB	T14G11.3	T14G11.1	145	chrX	2688221	2689221	101	88
UTGB	K09C4.10	K09C4.5	105	chrX	3280589	3281589	32	37
UTGB	ZK563.5	ZK563.7	159	chrX	3378651	3379651	215	18
UTGB	C12D12.4	C12D12.3	170	chrX	3487759	3488759	22	20
UTGB	R11G1.4a.1	R11G1.2	164	chrX	3650097	3651097	115	59
UTGB	F47B7.6	F47B7.2a	112	chrX	3772092	3773092	28	24
UTGB	C05E11.7	C05E11.1	136	chrX	4587585	4588585	50	60
UTGB	K02G10.8	F55D10.3	186	chrX	4711565	4712565	340	76
UTGB	M03F4.4	M03F4.2a	191	chrX	4959994	4960994	24	6929
UTGB	T03G11.6	T03G11.2	109	chrX	5178683	5179683	17	57
UTGB	Y34B4A.8	Y34B4A.3	148	chrX	5274901	5275901	28	74
UTGB	T22B7.5	T22B7.3	239	chrX	5646535	5647535	19	18
UTGB	R07E4.5	R07E4.3	134	chrX	5952794	5953794	55	20
UTGB	C15H9.8a	C15H9.3	124	chrX	6112529	6113529	330	47
UTGB	C14F11.6	C14F11.1b.1	169	chrX	6238626	6239626	274	23
UTGB	T22E5.5.1	T22E5.1a	93	chrX	6409852	6410852	65	32
UTGB	F38B6.7	F38B6.2	164	chrX	6697904	6698904	22	142
UTGB	K03A1.6	T08A9.6	176	chrX	7309445	7310445	84892	1570
UTGB	F08C6.6	F08C6.2a	154	chrX	7569431	7570431	61	17
UTGB	K09F5.5	K09F5.1	88	chrX	7736195	7737195	26	12
UTGB	ZK154.7	R03G5.3	94	chrX	7797984	7798984	21	137
UTGB	C18A11.7a	C18A11.3	181	chrX	8059382	8060382	31	21
UTGB	F13B9.8b	F13B9.1a	243	chrX	8286427	8287427	42	23
UTGB	F08F1.8.1	F08F1.3	193	chrX	8425905	8426905	460	21
UTGB	F18E9.7	F18E9.1	119	chrX	8599253	8600253	19	26
UTGB	B0416.6	B0416.2	105	chrX	9296212	9297212	27	14
UTGB	ZK899.5	ZK899.6	106	chrX	9460590	9461590	167	18
UTGB	ZC373.5	ZC373.6	157	chrX	10073855	10074855	371	41
UTGB	F09B9.3	F09B9.4	197	chrX	10158347	10159347	3357	95
UTGB	F14F3.3	F14F3.2	93	chrX	10524100	10525100	123	119
UTGB	F59F5.3	F59F5.4	36	chrX	10541872	10542872	57	10
UTGB	K09C8.5	F59F3.5	100	chrX	10979083	10980083	20	16
UTGB	F08G12.11	F08G12.8	102	chrX	11315171	11316171	27	43
UTGB	ZK455.5	ZK455.3	124	chrX	11326416	11327416	32	11
UTGB	T04F8.2	T04F8.3	83	chrX	11656274	11657274	80	23
UTGB	D1053.1	D1053.2	180	chrX	11727365	11728365	1212	23
UTGB	Y62H9A.5	Y62H9A.6	228	chrX	11882437	11883437	113	74
UTGB	W03G11.3	W03G11.1a	157	chrX	12103284	12104284	448	25
UTGB	F17A2.5	F17A2.13	188	chrX	12320344	12321344	414	181
UTGB	F42F12.2	F42F12.9	133	chrX	12341336	12342336	42	16
UTGB	T18D3.9	T18D3.1	143	chrX	12453919	12454919	101	68
UTGB	T18D3.2	T18D3.5	1	chrX	12463232	12464232	28	24
UTGB	T18D3.3	T18D3.4	106	chrX	12466354	12467354	147	36
UTGB	T24D5.5	T24D5.6	213	chrX	12600138	12601138	17	13
UTGB	F11C1.1	F11C1.7	96	chrX	12988842	12989842	33	348
UTGB	R04D3.4	R04D3.12	151	chrX	13288606	13289606	50	17
UTGB	F02C12.5c	C29F7.1	189	chrX	13409160	13410160	290	34
UTGB	F18H3.3a.1	F18H3.4	213	chrX	13526919	13527919	6275	45
UTGB	F54B11.5	F54B11.6	149	chrX	13597605	13598605	81	411
UTGB	C31E10.5	C31E10.6	148	chrX	13995409	13996409	20	22
UTGB	F16B12.4	F16B12.5	46	chrX	14098358	14099358	19	34
UTGB	T24C2.4	T24C2.2	129	chrX	14544516	14545516	25	14
UTGB	C05G5.3	C05G5.4	163	chrX	14753170	14754170	60	72
UTGB	C27C12.1	C27C12.4	236	chrX	14853429	14854429	53	435
UTGB	R03A10.3	R03A10.4a	85	chrX	15440662	15441662	28	105
UTGB	C30F2.2	C30F2.3	247	chrX	16079013	16080013	47	21
UTGB	F52E10.2	F52E10.3	203	chrX	16282792	16283792	15	13
UTGB	Y48G1C.6	Y48G1C.11	204	chrI	85957	86957	28	26
UTGB	C53D5.4	C53D5.1a	109	chrI	288682	289682	395	178
UTGB	Y48G1A.6a	Y48G1A.1	93	chrI	347946	348946	90	119
UTGB	R119.4	R119.6	121	chrI	382029	383029	421	579
UTGB	Y65B4BL.4	Y65B4BL.2	204	chrI	505841	506841	44	115
UTGB	Y65B4A.6	Y65B4A.3	83	chrI	636320	637320	277	292
UTGB	C54G6.1a	C54G6.5	198	chrI	1013958	1014958	195	22
UTGB	Y34D9A.4	Y34D9A.3	121	chrI	1033894	1034894	55	26
UTGB	Y92H12A.5	Y92H12A.4	122	chrI	1514067	1515067	47	23
UTGB	Y73E7A.5	Y73E7A.2	201	chrI	1601178	1602178	20	32
UTGB	Y73E7A.7	Y73E7A.1a.1	129	chrI	1628204	1629204	24	27
UTGB	Y71G12B.20a	Y71G12B.18	125	chrI	1650916	1651916	204	26
UTGB	C53H9.3	C53H9.2a	115	chrI	1832182	1833182	39	115
UTGB	Y51F10.7	Y51F10.6	116	chrI	1913494	1914494	95	30
UTGB	Y37E3.1	Y37E3.3	124	chrI	2063562	2064562	188	73
UTGB	Y37E3.8a.1	Y37E3.9	123	chrI	2070390	2071390	386	121
UTGB	F32B5.8	F32B5.4	77	chrI	2688982	2689982	418	21
UTGB	Y71F9B.6	Y71F9B.4	87	chrI	2726248	2727248	65	103
UTGB	W03D8.2	W03D8.6	183	chrI	2800374	2801374	31	104
UTGB	Y71F9AL.13a.1	Y71F9AL.9.1	134	chrI	2876034	2877034	3540	105
UTGB	Y54E10BL.6	Y54E10BR.4	92	chrI	3014990	3015990	73	47
UTGB	Y54E10BR.8	Y54E10BR.1	89	chrI	3058691	3059691	397	399
UTGB	K09H9.6	K09H9.2.1	131	chrI	3147410	3148410	86	43
UTGB	Y54E10A.15	Y54E10A.3	128	chrI	3227591	3228591	5482	216
UTGB	W05F2.3	W05F2.6	226	chrI	3368179	3369179	13	60
UTGB	Y47G6A.12	Y47G6A.28	84	chrI	3438479	3439479	44	15
UTGB	Y47G6A.14	Y47G6A.10	108	chrI	3466373	3467373	40	39
UTGB	Y47G6A.20b	Y47G6A.4	98	chrI	3546642	3547642	31	45
UTGB	Y47G6A.24a	Y47G6A.2.1	127	chrI	3605290	3606290	65	912
UTGB	Y47G6A.26	Y47G6A.32	69	chrI	3620015	3621015	10	93
UTGB	D1037.3.1	D1037.1	104	chrI	3681519	3682519	367	87
UTGB	C32E8.8	C32E8.1	188	chrI	3792609	3793609	29	14
UTGB	T03F1.9	T03F1.3	101	chrI	3865560	3866560	68	183
UTGB	T03F1.10	C50F2.3	112	chrI	3875214	3876214	63	608
UTGB	T20F5.7	T21E3.2	98	chrI	3929765	3930765	171	33
UTGB	E01A2.4.1	E01A2.2a	124	chrI	4131808	4132808	227	370
UTGB	E01A2.6	E01A2.1b	55	chrI	4138948	4139948	706	40
UTGB	R12E2.12	R12E2.3.1	76	chrI	4174568	4175568	68	27
UTGB	R12E2.13.1	R12E2.2	109	chrI	4178098	4179098	235	65
UTGB	C43E11.8	C43E11.4	64	chrI	4247115	4248115	29	485
UTGB	C43E11.10	C43E11.1	138	chrI	4270062	4271062	88	92
UTGB	C41D11.4	C41D11.2	95	chrI	4443973	4444973	40	29
UTGB	B0041.4.1	B0041.8.1	151	chrI	4646773	4647773	80	629
UTGB	B0041.6a	B0041.2b	22	chrI	4653794	4654794	54	51
UTGB	M04F3.3	M04F3.1.1	181	chrI	4767431	4768431	16	73
UTGB	F28B3.8	F28B3.5a	112	chrI	4926066	4927066	173	255
UTGB	W03G9.8	W03G9.3	84	chrI	4957852	4958852	1721	26
UTGB	Y110A7A.14.1	Y110A7A.11	115	chrI	5105697	5106697	90	87
UTGB	Y110A7A.19.1	Y110A7A.1b	146	chrI	5164522	5165522	87	111
UTGB	F55A12.9d.4	C24A11.2	40	chrI	5377383	5378383	25	11
UTGB	F27C1.7b	F27C1.2b	83	chrI	5429437	5430437	75	482
UTGB	C09D4.5.2	C09D4.3	117	chrI	5485510	5486510	616	38
UTGB	F59A3.4	F59A3.2a	105	chrI	5508843	5509843	125	30
UTGB	F59A3.7	F59A3.1	208	chrI	5518382	5519382	49	38
UTGB	M01E11.4c	M01E11.3	136	chrI	5571522	5572522	89	52
UTGB	C34G6.7b.1	C34G6.1	97	chrI	5903945	5904945	66	65
UTGB	B0207.6	B0207.4	144	chrI	5936651	5937651	22	249
UTGB	T27A3.7	T27A3.2	137	chrI	6109288	6110288	15	32
UTGB	T05E7.5	T05E7.1	177	chrI	6202528	6203528	1068	28
UTGB	C48E7.10	C48E7.5	141	chrI	6249639	6250639	2002	112
UTGB	R10A10.2	F37E3.1	89	chrI	6421476	6422476	60	1855
UTGB	C55B7.11	C55B7.1.1	121	chrI	6513403	6514403	60	144
UTGB	F57B10.10.2	F57B10.7	146	chrI	6554164	6555164	124	1187
UTGB	D2092.4	D2092.7	184	chrI	6615546	6616546	206	21
UTGB	F08B6.3	F08B6.1	114	chrI	6759834	6760834	47	126
UTGB	H27M09.5	H27M09.3	213	chrI	6846908	6847908	132553	85
UTGB	C48B6.6a	C48B6.3.1	85	chrI	6913668	6914668	103	234
UTGB	H06O01.1.1	F15C11.2a	174	chrI	7020997	7021997	558	107
UTGB	W01A8.2	W01A8.1b.2	98	chrI	7055951	7056951	53	60
UTGB	W01A8.4.1	W01A8.5	109	chrI	7068797	7069797	24	150
UTGB	F13G3.6	F13G3.7b.1	123	chrI	7304338	7305338	89	257
UTGB	T28F4.4	C26C6.1a	92	chrI	7492228	7493228	27	45
UTGB	D2030.4.1	D2030.5	91	chrI	7581393	7582393	58	101
UTGB	D2030.6.1	D2030.7	109	chrI	7588100	7589100	26	491
UTGB	F27D4.7	F27D4.4a.1	103	chrI	7724269	7725269	544	88
UTGB	T22C1.4	T22C1.5	75	chrI	7940279	7941279	136	56
UTGB	T01G9.4	T01G9.5b	80	chrI	8293527	8294527	73	118
UTGB	F02E9.2a	F02E9.7	125	chrI	8412442	8413442	35	77
UTGB	D1081.9	D1081.7b	124	chrI	8486934	8487934	45	146
UTGB	F43G9.1.1	F43G9.2a	152	chrI	8608361	8609361	71	40
UTGB	F43G9.3	F43G9.5	119	chrI	8614714	8615714	82	125
UTGB	F43G9.10	F43G9.12	99	chrI	8639894	8640894	17	15
UTGB	F39H11.5.1	F39H11.1	75	chrI	8695912	8696912	128	72
UTGB	C36B1.4.1	C36B1.3	168	chrI	8728128	8729128	687	140
UTGB	C36B1.5.1	C36B1.7	70	chrI	8735455	8736455	36	26
UTGB	DY3.3	DY3.4a.1	150	chrI	8767659	8768659	165	41
UTGB	F36A2.4	F36A2.7.1	122	chrI	8812954	8813954	13	36
UTGB	F32H2.3.1	F32H2.10	114	chrI	8969655	8970655	225	102
UTGB	F36F2.3b	F36F2.2	130	chrI	9013605	9014605	260	25
UTGB	W06D4.1	W06D4.2	105	chrI	9054943	9055943	401	38
UTGB	W06D4.5	W06D4.6	99	chrI	9064232	9065232	20	26
UTGB	C45G3.1	C45G3.3	125	chrI	9226382	9227382	119	226
UTGB	F14B4.3	F26H9.1	87	chrI	9286229	9287229	219	39
UTGB	F26H9.4	F26H9.6.1	160	chrI	9307209	9308209	43	133
UTGB	F30A10.2	F30A10.12	189	chrI	9480291	9481291	96	11
UTGB	F30A10.5.1	F30A10.6	131	chrI	9487811	9488811	982	166
UTGB	K07A1.13	K07A1.2.1	116	chrI	9584801	9585801	50	726
UTGB	T05F1.3.1	T05F1.6	145	chrI	9625574	9626574	155	156
UTGB	C03D6.4	C03D6.3a	92	chrI	9664691	9665691	87	1168
UTGB	F26E4.4.1	F26E4.6.1	111	chrI	9772179	9773179	68	61
UTGB	F26E4.8.1	F26E4.9.2	170	chrI	9788181	9789181	405	580
UTGB	Y106G6D.1	Y106G6D.2	219	chrI	10110254	10111254	95	257
UTGB	F45H11.2	F45H11.3b	127	chrI	10373844	10374844	290	43
UTGB	F25D7.5	Y106G6H.1	78	chrI	10429136	10430136	34	89
UTGB	Y106G6H.15	Y106G6H.16	103	chrI	10474294	10475294	150	77
UTGB	F59C6.6	F59C6.4.1	126	chrI	10517597	10518597	65	146
UTGB	F25H2.5.1	F25H2.6.2	157	chrI	10553422	10554422	5643	509
UTGB	C34B2.8	C34B2.2	125	chrI	10686700	10687700	256	108
UTGB	B0205.8	B0205.12	76	chrI	10729778	10730778	369	16
UTGB	B0205.11	B0205.7	121	chrI	10733285	10734285	313	149
UTGB	F55A3.7	F55A3.3	113	chrI	10788312	10789312	20	97
UTGB	Y53H1A.1a	Y53H1A.2b	120	chrI	11221661	11222661	22	129
UTGB	H25P06.1.1	H25P06.2b	103	chrI	11322874	11323874	135	33
UTGB	Y53H1C.2a	Y53H1C.3	76	chrI	11416243	11417243	51	25
UTGB	Y47H9C.7	Y47H9C.12	213	chrI	11895967	11896967	24	13
UTGB	R09B3.3	R09B3.4	141	chrI	11910547	11911547	194	148
UTGB	Y18D10A.16	Y18D10A.17	108	chrI	12903571	12904571	114	239
UTGB	Y40B1B.7	Y40B1B.8	100	chrI	13428262	13429262	158	59
UTGB	Y87G2A.18	Y87G2A.1	215	chrI	13513908	13514908	103	18
UTGB	W04A8.1	W04A8.2	104	chrI	13839574	13840574	77	45
UTGB	F47G4.2	Y63D3A.10	202	chrI	14082196	14083196	98	46
UTGB	Y63D3A.4	Y63D3A.5.1	98	chrI	14100715	14101715	58	87
UTGB	Y105E8A.2	Y105E8A.3	127	chrI	14357973	14358973	25	1014
UTGB	Y105E8A.8	Y105E8A.9	109	chrI	14405269	14406269	22	162
UTGB	Y105E8B.2b.1	Y105E8B.7	133	chrI	14642164	14643164	295	123
UTGB	F39B2.3	F39B2.2.1	92	chrI	14789573	14790573	199	71
UTGB	Y54E5B.2	Y54E5B.3b	96	chrI	14819790	14820790	261	130
UTGB	T01G6.8	T01G6.6a	92	chrV	484356	485356	18	11
UTGB	H24K24.5	H24K24.4	246	chrV	902955	903955	265	19
UTGB	K10C9.8	K10C9.3	169	chrV	1059906	1060906	76	237
UTGB	Y50D4A.4	Y50D4A.2.1	97	chrV	1195688	1196688	208	371
UTGB	R09B5.4	F53E2.1	175	chrV	1466784	1467784	32	207
UTGB	T10B5.3	T10B5.6	105	chrV	1868299	1869299	25	82
UTGB	F41B5.11	F41B5.3	134	chrV	2244421	2245421	16	14
UTGB	T27B7.1	T27B7.7	181	chrV	2278220	2279220	27	1135
UTGB	F53E10.6.1	F53E10.3	112	chrV	2602717	2603717	29	13
UTGB	Y45G12B.3	Y45G12B.2a	227	chrV	2694048	2695048	72	51
UTGB	T03D3.12	T03D3.1	103	chrV	2848796	2849796	78	2195
UTGB	Y73C8B.2	Y73C8B.5	138	chrV	3194768	3195768	23	51
UTGB	T20D4.19	T20C4.1	135	chrV	3431211	3432211	138	67
UTGB	B0213.17	B0213.5	113	chrV	3980197	3981197	29	28
UTGB	Y45G5AM.8	Y45G5AM.2	139	chrV	4175276	4176276	38	19
UTGB	ZC132.6	ZC132.2	98	chrV	4310182	4311182	50	31
UTGB	Y61A9LA.8	Y61A9LA.3b	79	chrV	4569914	4570914	67	92
UTGB	C18G1.9	C18G1.2a	135	chrV	4770092	4771092	31	525
UTGB	C04F5.9	C04F5.1	248	chrV	5118889	5119889	76	22
UTGB	T09D3.3	T09D3.1	162	chrV	5349141	5350141	16	32
UTGB	T05C3.5.1	C24G6.4.1	134	chrV	5504730	5505730	176	765
UTGB	C14C11.6	C14C11.2.2	62	chrV	5660628	5661628	25	52
UTGB	F25B4.6	F25B4.4	119	chrV	5684237	5685237	154	97
UTGB	K09H11.9	K09H11.10	148	chrV	5716214	5717214	21	26
UTGB	F29G9.5	F29G9.3	215	chrV	6017271	6018271	46	96
UTGB	EGAP9.2	EGAP9.4	77	chrV	6575389	6576389	889	14
UTGB	EGAP9.3	ZK1055.5	166	chrV	6579681	6580681	362	25
UTGB	Y57E12AL.6.2	Y57E12AL.1a	101	chrV	7060019	7061019	48	590
UTGB	F09G2.8.1	F09G2.2	134	chrV	7193840	7194840	216	215
UTGB	C13F10.6	C13F10.2	108	chrV	7220596	7221596	113	98
UTGB	F10G2.6b	F10G2.4	98	chrV	7326568	7327568	25	2341
UTGB	F10G2.9	C03G6.10	36	chrV	7341543	7342543	100	25
UTGB	F18E3.7a	F25E5.16	74	chrV	7436513	7437513	18	19
UTGB	F25E5.14	F25E5.1	185	chrV	7465190	7466190	42	316
UTGB	C54F6.10	C54F6.9	104	chrV	7508147	7509147	19	31
UTGB	F19F10.9	F19F10.12	88	chrV	7575210	7576210	429	303
UTGB	C12D5.8a	C12D5.2	136	chrV	7685841	7686841	64	89
UTGB	C26F1.9.1	C26F1.4.1	101	chrV	7775791	7776791	141	119
UTGB	Y97E10AL.3	Y97E10AL.2.1	109	chrV	7983296	7984296	386	99
UTGB	Y97E10AR.6	F43H9.2b	141	chrV	8015156	8016156	15	25
UTGB	D1014.8	D1014.3.1	133	chrV	8128961	8129961	124	67
UTGB	F20D6.9	F20D6.4d	109	chrV	8178584	8179584	22	88
UTGB	F20D6.11	K07C11.5	66	chrV	8198658	8199658	17	13
UTGB	K07C11.9	K07C11.2.1	105	chrV	8220799	8221799	384	285
UTGB	T23B12.7	T23B12.4	139	chrV	8461759	8462759	49	620
UTGB	F45F2.10	F45F2.7	79	chrV	8518686	8519686	26	10
UTGB	F45F2.12	F45F2.4	226	chrV	8532710	8533710	3504	152992
UTGB	F45F2.13	F45F2.3	177	chrV	8534568	8535568	9692	21609
UTGB	F41E6.9	F41E6.4a	134	chrV	8605946	8606946	97	136
UTGB	T18H9.7a	T18H9.1	103	chrV	9218894	9219894	429	48
UTGB	K07B1.5a.1	K07B1.3	75	chrV	9333597	9334597	34	43
UTGB	K07B1.6b.1	K07B1.1	28	chrV	9343705	9344705	9715	39
UTGB	C50F4.9	C50F4.1.1	104	chrV	9526237	9527237	24	28
UTGB	C50F4.13.1	C50F4.7	174	chrV	9546475	9547475	43	257
UTGB	T06E4.3b	T06E4.1	123	chrV	9645171	9646171	94	249
UTGB	ZK287.5.1	ZK287.7	98	chrV	9690401	9691401	59	47
UTGB	F58E6.8	F58E6.7	198	chrV	9755915	9756915	18	179
UTGB	T11A5.7	T11A5.5	67	chrV	9879143	9880143	24	14
UTGB	K08H10.7	K08H10.9	87	chrV	9991302	9992302	38	366
UTGB	C12D8.1b	C12D8.8	96	chrV	10238347	10239347	4099	23
UTGB	B0024.2	B0024.4	98	chrV	10295034	10296034	24	27
UTGB	B0024.12	B0024.13b	95	chrV	10319820	10320820	41	86
UTGB	C35A5.8.1	F25D1.3	115	chrV	10528131	10529131	61	27
UTGB	T21C9.4	T21C9.5	125	chrV	10578609	10579609	360	49
UTGB	ZC302.1.1	ZC302.2a	101	chrV	10736412	10737412	30	47
UTGB	F17C11.11	F17C11.1	86	chrV	10940526	10941526	66	151
UTGB	F17C11.10	F17C11.9a	192	chrV	10965140	10966140	502	13737
UTGB	H19N07.1.1	H19N07.2b	107	chrV	11112858	11113858	19	332
UTGB	C06H2.1.1	C06H2.6	99	chrV	11123648	11124648	87	180
UTGB	K10D6.2b	K10D6.3	177	chrV	11197757	11198757	97	75
UTGB	F07B10.1	F07B10.2	91	chrV	11265190	11266190	22	16
UTGB	T11F9.11	T11F9.19	130	chrV	11490255	11491255	72	14
UTGB	C55A6.7	C55A6.11	85	chrV	11520004	11521004	49	13
UTGB	D2023.5	D2023.6	210	chrV	11826913	11827913	53	64
UTGB	C52E4.6a.1	C52E4.7	117	chrV	11993390	11994390	29	86
UTGB	ZK863.4.1	ZK863.5	124	chrV	12184004	12185004	70	10
UTGB	F55C5.5	F55C5.4	122	chrV	12271155	12272155	102	18
UTGB	R04F11.5	R04F11.2.1	128	chrV	12317819	12318819	144	289
UTGB	K01D12.6	K01D12.8	127	chrV	12400358	12401358	1291	55
UTGB	W04D2.4	W04D2.6a	117	chrV	12497407	12498407	60	195
UTGB	T28H10.2	T28H10.3	133	chrV	12512450	12513450	26	579
UTGB	F56H9.4	F56H9.5	161	chrV	12649291	12650291	37	473
UTGB	R11D1.8.5	R11D1.9	94	chrV	12727964	12728964	146	16
UTGB	R11D1.11	C15C8.1	219	chrV	12733192	12734192	129	25
UTGB	C15C8.7	C15C8.5	71	chrV	12745006	12746006	96	32
UTGB	R90.4	F54F3.1	113	chrV	12908350	12909350	21	37
UTGB	B0365.6.3	B0365.7	233	chrV	13137439	13138439	37	32
UTGB	C50B6.2.1	C50B6.3	98	chrV	13312714	13313714	380	53
UTGB	F25H9.6	F25H9.7	100	chrV	13467849	13468849	1153	291
UTGB	T10G3.5a	T10G3.6	83	chrV	13497143	13498143	156	90
UTGB	C56A3.4	C56A3.5	96	chrV	13551293	13552293	357	15
UTGB	C56A3.1	C50B8.1	144	chrV	13564919	13565919	59	211
UTGB	F53F4.2	F53F4.3	119	chrV	13591168	13592168	31	38
UTGB	F53F4.10.1	F53F4.12	83	chrV	13625298	13626298	45	46
UTGB	F58G11.5.1	F58G11.6	154	chrV	13678221	13679221	31	382
UTGB	F53C11.4.1	F53C11.5a	176	chrV	13786911	13787911	192	82
UTGB	R10D12.12	R10D12.13a	218	chrV	13961634	13962634	33	124
UTGB	ZC376.5	ZC376.6	94	chrV	14185146	14186146	551	882
UTGB	F23B12.8.1	F08H9.1	199	chrV	14456319	14457319	403	20
UTGB	C47E8.4	C47E8.5.1	194	chrV	14685255	14686255	47	311
UTGB	H12D21.4	H12D21.7.1	177	chrV	14895055	14896055	19	452
UTGB	H12D21.6	H12D21.10	160	chrV	14899194	14900194	24	301
UTGB	T06E6.1	T06E6.4	150	chrV	15396740	15397740	54	10
UTGB	T06C12.10.1	T06C12.12	92	chrV	15890958	15891958	39	10
UTGB	C06C6.5a	C06C6.4	156	chrV	16000126	16001126	21	14
UTGB	T10C6.13	T10C6.14	177	chrV	16041870	16042870	6335	43923
UTGB	F14H3.9	F14H3.11	145	chrV	16070830	16071830	10	50
UTGB	F21H7.3	F21H7.4	136	chrV	16232904	16233904	112	328
UTGB	T13F3.6	T13F3.8	184	chrV	16270600	16271600	20	25
UTGB	F36D3.6	F36D3.1	16	chrV	16498011	16499011	10	92
UTGB	W06H3.2a	W06H3.3	99	chrV	16794629	16795629	36	38
UTGB	T20B3.16	T20B3.12	164	chrV	16848018	16849018	21	19
UTGB	Y102A5B.3	Y102A5B.1	71	chrV	16851597	16852597	30	12
UTGB	F40D4.13	F40D4.12	108	chrV	17158879	17159879	1256	21
UTGB	F31E9.4	F31E9.2	208	chrV	17327539	17328539	65	11
UTGB	F59A1.7	F59A1.10	209	chrV	17658986	17659986	150	29
UTGB	Y59A8A.1	Y59A8A.2	59	chrV	17870331	17871331	32	32
UTGB	C31G12.4	C31G12.1	211	chrV	18179347	18180347	12	109
UTGB	Y51A2D.9	Y51A2D.10.1	185	chrV	18556154	18557154	80	23
UTGB	C54E10.6	C54E10.3	122	chrV	18808275	18809275	133	29
UTGB	Y39B6A.40	Y39B6A.39	94	chrV	18980653	18981653	33	40
UTGB	F55C9.6	F55C9.7	127	chrV	19297194	19298194	128	44
UTGB	Y43F8C.7.1	Y43F8C.8	129	chrV	19643589	19644589	233	74
UTGB	Y43F8C.13	Y43F8C.14	226	chrV	19692495	19693495	53	72
UTGB	Y113G7A.9	Y113G7A.3.1	87	chrV	20085773	20086773	84	132
UTGB	Y113G7B.2	Y113G7B.4	233	chrV	20190648	20191648	48	24
UTGB	Y113G7B.8	Y113G7B.9	127	chrV	20201148	20202148	118	19
UTGB	Y113G7B.17.1	Y113G7B.16	134	chrV	20264867	20265867	220	27
UTGB	F31D4.2	F31D4.3.1	73	chrV	20840584	20841584	46	248
UTGB	F25C8.2	F25C8.4	35	chrV	20898415	20899415	77	22
UTGB	W05G11.4	W05G11.3.1	169	chrIII	39279	40279	35	21
UTGB	F54C4.4	F54C4.1	141	chrIII	86871	87871	106	51
UTGB	T17A3.9	T17A3.1	195	chrIII	153878	154878	63	57
UTGB	F40G9.9	F40G9.12	103	chrIII	171277	172277	476	65
UTGB	F40G9.14	F40G9.6	108	chrIII	178665	179665	4088	199
UTGB	F40G9.11	F40G9.3	119	chrIII	188186	189186	31	41
UTGB	F42G9.7	B0412.4.1	168	chrIII	793271	794271	142	103
UTGB	K02F3.11.1	K02F3.1	115	chrIII	853666	854666	69	64
UTGB	T24C4.7	F23H11.2	121	chrIII	895185	896185	1167	177
UTGB	T12B5.11	T12B5.4	92	chrIII	950137	951137	206	43
UTGB	T12B5.15	T12B5.2	126	chrIII	955664	956664	11	27
UTGB	BE0003N10.2	BE0003N10.1	102	chrIII	1036852	1037852	109	49
UTGB	Y92C3B.3b	Y92C3B.1	162	chrIII	1080284	1081284	32	18
UTGB	F58B6.1	Y71D11A.3a	76	chrIII	1115910	1116910	35	1001
UTGB	Y119D3B.22	Y119D3B.6	139	chrIII	1248918	1249918	15	57
UTGB	Y82E9BR.15	Y82E9BR.3.2	152	chrIII	1418372	1419372	127	30
UTGB	Y67D2.7	Y67D2.2	119	chrIII	1558141	1559141	143	593
UTGB	Y22D7AL.10.1	Y22D7AL.5b.1	232	chrIII	1618633	1619633	2196	44
UTGB	Y39A3CL.6	Y39A3CL.7b	118	chrIII	1824209	1825209	25	250
UTGB	B0524.6	B0524.1	93	chrIII	1905299	1906299	24	92
UTGB	F53A3.2	F53A3.3a.2	134	chrIII	1949914	1950914	25	127
UTGB	Y54F10BL.1	Y54F10BM.6	153	chrIII	2262651	2263651	26	359
UTGB	Y54F10AR.1	Y71H2B.8	41	chrIII	2576294	2577294	50	13
UTGB	Y71H2AM.9	Y71H2AM.8	110	chrIII	2698440	2699440	52	179
UTGB	Y71H2AM.20a.1	Y71H2AM.5.3	101	chrIII	2785533	2786533	147	539
UTGB	M01F1.4a	M01F1.6	153	chrIII	3509594	3510594	78	34
UTGB	C46F11.3	C46F11.2a	97	chrIII	3650356	3651356	32	82
UTGB	R13G10.1	R13G10.2	228	chrIII	3819850	3820850	173	203
UTGB	C36A4.4.1	C36A4.5	105	chrIII	3843551	3844551	11	12
UTGB	C03C10.3.1	C03C10.7	137	chrIII	4094614	4095614	80	79
UTGB	T08A11.2	R10E4.1.1	111	chrIII	4269184	4270184	16	155
UTGB	B0285.3	B0285.4	112	chrIII	4342802	4343802	909	44
UTGB	R07E5.17	R07E5.3	149	chrIII	4403972	4404972	365	467
UTGB	R07E5.10b.2	R07E5.8.1	179	chrIII	4417849	4418849	37	78
UTGB	F56F3.2b	F56F3.4	75	chrIII	4468040	4469040	147	15
UTGB	F56F3.1	F56F3.5	144	chrIII	4475129	4476129	390	74
UTGB	M88.2	M88.7	122	chrIII	4542028	4543028	352	38
UTGB	F35G12.1a	F35G12.2.1	115	chrIII	4568210	4569210	144	228
UTGB	F35G12.3a	F35G12.4b	222	chrIII	4578028	4579028	21	45
UTGB	F35G12.7	F35G12.8	115	chrIII	4586813	4587813	422	358
UTGB	T04A8.6	T04A8.8	93	chrIII	4692939	4693939	63	64
UTGB	T04A8.16	T04A8.11	116	chrIII	4703572	4704572	52	59
UTGB	F17C8.6	F17C8.2	133	chrIII	4747556	4748556	28	37
UTGB	B0393.1.1	B0393.2.1	161	chrIII	4753815	4754815	46	260
UTGB	C35D10.11	C35D10.2	147	chrIII	4870171	4871171	26	20
UTGB	C35D10.13	C35D10.16	92	chrIII	4877936	4878936	165	116
UTGB	F26F4.8	F26F4.3	105	chrIII	4904948	4905948	469	31
UTGB	F26F4.9b	F26F4.1	106	chrIII	4912000	4913000	387	49
UTGB	C45G9.7	C45G9.5	140	chrIII	5046791	5047791	22	66
UTGB	Y54H5A.3	Y54H5A.1.1	111	chrIII	5152814	5153814	36	99
UTGB	C34E10.8	C34E10.3	125	chrIII	5253762	5254762	27	17
UTGB	ZC395.10.1	ZC395.3b	104	chrIII	5274629	5275629	426	115
UTGB	T24G10.2	F48E8.6	90	chrIII	5442485	5443485	153	82
UTGB	F48E8.7a	F48E8.5.2	69	chrIII	5447836	5448836	781	83
UTGB	D1044.6	D1044.1	156	chrIII	5542572	5543572	34	139
UTGB	F56D2.6a	F56D2.1.2	96	chrIII	5591417	5592417	1949	17
UTGB	B0336.6.1	B0336.5b	126	chrIII	5692338	5693338	188	317
UTGB	B0336.8	B0336.4b	92	chrIII	5697991	5698991	55	87
UTGB	W03A3.2	R12B2.4	131	chrIII	5802608	5803608	106	171
UTGB	F01F1.13	F01F1.1a	84	chrIII	5878939	5879939	31	745
UTGB	C28H8.12	C28H8.1	55	chrIII	5925407	5926407	17	27
UTGB	F25B5.6a	F25B5.3b	96	chrIII	5947797	5948797	306	59
UTGB	C23G10.7c	C23G10.4b	125	chrIII	6198296	6199296	92	41
UTGB	T12A2.8.1	T12A2.2.1	99	chrIII	6247729	6248729	339	181
UTGB	C16A3.9.1	C16A3.7	145	chrIII	6374624	6375624	273	20
UTGB	C05D11.10	C05D11.3	70	chrIII	6431455	6432455	29	115
UTGB	T26A5.8	T26A5.3	62	chrIII	6462647	6463647	272	311
UTGB	F37A4.8	F37A4.5	112	chrIII	6709633	6710633	659	70
UTGB	F37A4.9	F37A4.2.1	91	chrIII	6721889	6722889	109	212
UTGB	R13F6.5	R13F6.3	209	chrIII	6849603	6850603	18	20
UTGB	R13F6.10	R13F6.1	95	chrIII	6868955	6869955	133	26
UTGB	K04C2.4.1	K04C2.2	94	chrIII	6889022	6890022	424	136
UTGB	T07E3.5	T07E3.3	195	chrIII	6902797	6903797	25	30
UTGB	F57B9.8	F57B9.4e	74	chrIII	6935107	6936107	17	21
UTGB	F11H8.3	F11H8.1.1	174	chrIII	7020848	7021848	24	23
UTGB	B0280.9	B0280.3.1	111	chrIII	7122461	7123461	120	33
UTGB	B0280.10	B0280.1a	80	chrIII	7133198	7134198	83	200
UTGB	F37C12.9.1	F37C12.4.1	118	chrIII	7179280	7180280	39	298
UTGB	T20B12.8	T20B12.3	105	chrIII	7381392	7382392	37	269
UTGB	R13A5.8.1	R13A5.12.1	121	chrIII	7572516	7573516	390	108
UTGB	C27D11.1	ZK652.6a.1	94	chrIII	7828562	7829562	48	125
UTGB	ZK652.11.1	ZK652.1.1	103	chrIII	7861169	7862169	225	68
UTGB	C02C2.4	C02C2.3	134	chrIII	7865869	7866869	11	178
UTGB	ZK688.5a	ZK688.3.1	206	chrIII	7891427	7892427	37	87
UTGB	C29E4.13a	C29E4.4	116	chrIII	7928166	7929166	139	152
UTGB	F44B9.6	F44B9.2	220	chrIII	8020737	8021737	70	43
UTGB	K12H4.8	K06H7.6	106	chrIII	8079800	8080800	874	609
UTGB	K06H7.7	K06H7.4.1	89	chrIII	8084985	8085985	355	35
UTGB	K06H7.8	C14B9.4b	89	chrIII	8100577	8101577	22	44
UTGB	C14B9.7.1	C14B9.10.2	173	chrIII	8129978	8130978	68	38
UTGB	C14B9.8	D2007.4	126	chrIII	8144226	8145226	22	31
UTGB	C02F5.14	C02F5.5	113	chrIII	8235010	8236010	17	20
UTGB	F09G8.7	F09G8.2	198	chrIII	8267942	8268942	211	28
UTGB	F10E9.7	F10E9.5	159	chrIII	8306953	8307953	169	97
UTGB	ZC262.8.2	ZC262.2a	94	chrIII	8331421	8332421	64	132
UTGB	R05D3.8	R05D3.4a	149	chrIII	8357803	8358803	978	138
UTGB	ZK353.8.1	ZK353.1a	114	chrIII	8405066	8406066	66	266
UTGB	F22B7.6b.2	F22B7.13	80	chrIII	8627998	8628998	389	30
UTGB	F22B7.10	B0523.1	139	chrIII	8668337	8669337	109	37
UTGB	B0523.5	B0303.2	118	chrIII	8683266	8684266	65	82
UTGB	ZK637.1.1	ZK637.2	247	chrIII	8885959	8886959	111	14
UTGB	ZK643.5	ZK643.2	92	chrIII	8955856	8956856	351	248
UTGB	F59B2.8	F59B2.11	146	chrIII	9009644	9010644	290	30
UTGB	R107.5b.1	R107.6.2	156	chrIII	9054010	9055010	43	132
UTGB	F02A9.2.1	F02A9.3.1	193	chrIII	9080776	9081776	177	23
UTGB	ZK512.9	ZK512.3	247	chrIII	9117958	9118958	61	91
UTGB	ZK512.2	ZK512.4	64	chrIII	9144506	9145506	127	68
UTGB	F54G8.4	F54G8.1	176	chrIII	9153388	9154388	110	12
UTGB	B0464.1.1	B0464.2	84	chrIII	9490748	9491748	265	71
UTGB	F55H2.6.1	ZK1098.1	137	chrIII	9521317	9522317	262	127
UTGB	F58A4.4	F58A4.6	87	chrIII	9613810	9614810	64	104
UTGB	T05G5.10	T05G5.4	57	chrIII	9748058	9749058	238	44
UTGB	R10E11.4	R10E11.8.2	95	chrIII	9780205	9781205	288	574
UTGB	ZK632.6	ZK632.7	178	chrIII	9816770	9817770	152	76
UTGB	ZK632.13.1	ZK632.11	136	chrIII	9824451	9825451	638	82
UTGB	K11H3.6	K11H3.3	110	chrIII	9849321	9850321	21	31
UTGB	ZK1128.1.1	ZK1128.2b	197	chrIII	10114305	10115305	243	53
UTGB	T20G5.13	T20G5.1	126	chrIII	10202768	10203768	16	40
UTGB	T07A5.5	T07C4.10	152	chrIII	10320334	10321334	64	113
UTGB	D2045.5	D2045.6	216	chrIII	10470394	10471394	35	1427
UTGB	Y45F3A.1	Y45F3A.2	241	chrIII	10562110	10563110	64	31
UTGB	K01G5.7.1	K01G5.6	144	chrIII	10742087	10743087	154	111
UTGB	Y47D3A.14	Y47D3A.15	82	chrIII	11236358	11237358	50	52
UTGB	Y47D3A.22	Y47D3A.26.1	101	chrIII	11290131	11291131	39	327
UTGB	Y47D3A.27	Y47D3A.28	97	chrIII	11316597	11317597	29	38
UTGB	T28D6.6	T28D6.9	82	chrIII	11342658	11343658	44	987
UTGB	Y47D3B.10.2	Y47D3B.1	201	chrIII	11380142	11381142	148	39
UTGB	Y66D12A.21	Y66D12A.20	133	chrIII	11504809	11505809	98	38
UTGB	Y66D12A.17	Y66D12A.16a	130	chrIII	11523661	11524661	35	40
UTGB	Y41C4A.10	Y41C4A.11	216	chrIII	11719027	11720027	74	42
UTGB	C24H11.7	C24H11.6	100	chrIII	11774086	11775086	78	109
UTGB	C24H11.3	C24H11.1	195	chrIII	11785618	11786618	119	17
UTGB	C18D11.7	C18D11.9	98	chrIII	11806235	11807235	25	10
UTGB	Y56A3A.19	Y56A3A.17a	97	chrIII	11915246	11916246	95	267
UTGB	Y75B8A.22.1	Y75B8A.23	145	chrIII	12249772	12250772	29	248
UTGB	Y75B8A.30	Y75B8A.31	128	chrIII	12350903	12351903	42	49
UTGB	Y49E10.20.1	Y49E10.21	204	chrIII	12456398	12457398	15	131
UTGB	Y111B2A.16	Y111B2A.17	135	chrIII	12672953	12673953	19	88
UTGB	BE10.5	BE10.3	194	chrIII	12807302	12808302	18	222
UTGB	Y37D8A.9b.1	Y37D8A.10	151	chrIII	12874273	12875273	261	53
UTGB	Y37D8A.17	Y37D8A.18	111	chrIII	12925622	12926622	134	25
UTGB	Y37D8A.21.2	Y37D8A.22	105	chrIII	12931392	12932392	23	50
UTGB	ZK1010.1.1	ZK1010.3	125	chrIII	12978375	12979375	184	43
UTGB	Y43F4B.2	Y43F4B.4	95	chrIII	13296101	13297101	397	31
UTGB	Y43F4B.6.1	Y43F4B.7	142	chrIII	13306665	13307665	301	42
UTGB	F53A2.3	F53A2.4	98	chrIII	13340559	13341559	70	299
UTGB	F11F1.4	F11F1.7	99	chrIII	13403920	13404920	15	24
UTGB	T27E9.2.1	T27E9.1b.2	131	chrIII	13462498	13463498	321	17447
UTGB	K08E3.6.1	K08E3.7.1	113	chrIII	13770759	13771759	98	98
UTGB	T21D12.4	T21D12.12	218	chrIV	264039	265039	52	159
UTGB	T21D12.5	T21D12.9a	249	chrIV	273986	274986	18	17
UTGB	T07A9.1	T07A9.13b	14	chrIV	387121	388121	476	53
UTGB	T07A9.2	T07A9.10	128	chrIV	389988	390988	91	234
UTGB	C18H7.9	C18H7.2a	165	chrIV	605780	606780	11	21
UTGB	K11H12.1	K11H12.8a	204	chrIV	653055	654055	15	49
UTGB	F56B3.2a	F56B3.9	193	chrIV	768024	769024	156	52
UTGB	Y55F3AM.13	Y55F3AM.1.2	87	chrIV	1056235	1057235	94	28
UTGB	Y41D4B.20	Y41D4B.8	109	chrIV	1619573	1620573	25	96
UTGB	K08D12.1	K08D12.2	77	chrIV	1710488	1711488	35	1408
UTGB	Y38F2AR.7	Y38F2AR.6	121	chrIV	2348609	2349609	72	42
UTGB	Y38F2AR.9.1	Y38F2AR.1	50	chrIV	2389606	2390606	150	50
UTGB	Y69A2AR.27	Y69A2AR.7a	80	chrIV	2599247	2600247	64	29
UTGB	Y69A2AR.30a.1	Y69A2AR.3.3	135	chrIV	2640610	2641610	163	16
UTGB	Y54G2A.15	Y54G2A.40	105	chrIV	2845942	2846942	18	62
UTGB	C04C3.5b	C04C3.3.1	127	chrIV	3398725	3399725	44	37
UTGB	Y37E11AL.8	Y37E11AL.3a.1	73	chrIV	3694350	3695350	337	558
UTGB	Y37E11AM.2.1	Y37E11AM.1	124	chrIV	3725545	3726545	1190	198
UTGB	M02B7.4	M02B7.2	98	chrIV	3802953	3803953	1390	106
UTGB	F29B9.11.1	F29B9.2a	67	chrIV	4659877	4660877	217	25
UTGB	E04A4.8.1	Y17G9B.5	129	chrIV	4749575	4750575	96	114
UTGB	Y17G9B.8	Y17G9B.3	97	chrIV	4758308	4759308	740	71
UTGB	R11E3.5a	R11E3.1	98	chrIV	4788035	4789035	87	36
UTGB	F41H10.6c	F41H10.4.1	110	chrIV	5363807	5364807	712	25
UTGB	ZK616.6	ZK616.4.1	99	chrIV	5394387	5395387	916	224
UTGB	H04M03.11	H04M03.4	116	chrIV	5885152	5886152	33	76
UTGB	C49A9.8.1	C49A9.6	79	chrIV	6210252	6211252	138	24
UTGB	F58F9.7.1	F58F9.1	117	chrIV	6248163	6249163	22	199
UTGB	Y73B6BL.12	Y73B6BL.6a.2	140	chrIV	6323346	6324346	105	125
UTGB	F38A5.2a	F38A5.13	168	chrIV	6585078	6586078	69	65
UTGB	C17H12.2	C17H12.14.1	200	chrIV	6790102	6791102	189	250
UTGB	T05A12.3	T05A12.4a	161	chrIV	6887383	6888383	759	186
UTGB	T22D1.9.1	T22D1.3b.1	144	chrIV	6912136	6913136	1212	79
UTGB	C06G3.10	C06G3.2	123	chrIV	7039125	7040125	725	52
UTGB	ZC477.5	ZC477.3a	106	chrIV	7102959	7103959	109	1426
UTGB	F55G1.11	F55G1.2	193	chrIV	7487604	7488604	167508	8446
UTGB	R05G6.7.1	R05G6.5	141	chrIV	7507791	7508791	1270	49
UTGB	R05G6.8	R05G6.4	114	chrIV	7512524	7513524	99	60
UTGB	F45E4.6	F45E4.1	5	chrIV	7634043	7635043	527	37
UTGB	C46A5.9	C33H5.7	115	chrIV	7773905	7774905	138	234
UTGB	Y42H9AR.4	Y42H9AR.1.2	108	chrIV	8112820	8113820	59	106
UTGB	F42G8.12.1	F42G8.5	98	chrIV	8135766	8136766	103	42
UTGB	D2096.5	D2096.4.1	99	chrIV	8359684	8360684	334	77
UTGB	D2096.8	D2096.2a	113	chrIV	8378998	8379998	240	86
UTGB	T26A8.4.1	T26A8.1.1	199	chrIV	8432436	8433436	1658	467
UTGB	F21D5.7.1	F20C5.1a	123	chrIV	8743616	8744616	113	90
UTGB	F20C5.2b	F20C5.4	33	chrIV	8762236	8763236	26	30
UTGB	T28C6.4	T28C6.7	109	chrIV	8826282	8827282	18	107
UTGB	D1046.2.1	D1046.1.3	168	chrIV	8925657	8926657	276	297
UTGB	F23B2.13	F23B2.6	114	chrIV	9146633	9147633	62	41
UTGB	Y11D7A.1	Y11D7A.3b	208	chrIV	9232394	9233394	24	98
UTGB	F49C12.9	F49C12.8	114	chrIV	9315718	9316718	2650	219
UTGB	C33A12.1	F56H11.4	59	chrIV	9524593	9525593	23	27
UTGB	ZK1251.9	K01H12.1	93	chrIV	9706379	9707379	13	417
UTGB	T13F2.2.1	T13F2.1.1	89	chrIV	9797037	9798037	256	795
UTGB	W08D2.5	W08D2.7	76	chrIV	9825036	9826036	28	43
UTGB	F32B6.3	F32B6.2.1	92	chrIV	9883901	9884901	22	251
UTGB	F25H8.1a	F25H8.2	102	chrIV	9931705	9932705	135	1245
UTGB	C47E12.2.1	C47E12.1.1	71	chrIV	10003024	10004024	88	27
UTGB	C04G2.5	C04G2.6	76	chrIV	10096569	10097569	26	154
UTGB	K08F4.2.2	K08F4.3	140	chrIV	10128686	10129686	51	128
UTGB	K04D7.4	K04D7.5b	211	chrIV	10194471	10195471	25	23
UTGB	Y43C5A.6a	R09E10.7	225	chrIV	10284199	10285199	82	150
UTGB	R11A8.1	R11A8.2	81	chrIV	10357477	10358477	27	79
UTGB	K08C7.4	K08C7.5	209	chrIV	10681891	10682891	21	69
UTGB	R102.9	ZC168.1	202	chrIV	10714217	10715217	12	694
UTGB	ZC168.3	ZC168.4.2	135	chrIV	10734182	10735182	110	307
UTGB	F13E9.6	F13E9.3	141	chrIV	10878447	10879447	123	17
UTGB	F36H1.5	F36H1.10	20	chrIV	11032100	11033100	18	13
UTGB	C08F8.9	R07H5.2a.1	91	chrIV	11178884	11179884	21	33
UTGB	B0035.3	B0035.4.1	118	chrIV	11314554	11315554	160	82
UTGB	H02I12.4	H02I12.7	116	chrIV	11397855	11398855	5139	22
UTGB	F22B3.2	F22B3.1	191	chrIV	11406459	11407459	6607	97558
UTGB	C10C6.6	H21P03.2	35	chrIV	11478957	11479957	27	350
UTGB	M04B2.4.1	M04B2.3	112	chrIV	11520615	11521615	49	66
UTGB	Y24F12A.2	Y24F12A.1	74	chrIV	11604559	11605559	30	46
UTGB	M117.4	F38H4.1	47	chrIV	11835300	11836300	12	21
UTGB	F38H4.8.1	F38H4.9.1	85	chrIV	11856768	11857768	143	144
UTGB	T12G3.7a	T12G3.5	90	chrIV	12029461	12030461	108	85
UTGB	T12G3.6	T12G3.1.1	193	chrIV	12032117	12033117	190	56
UTGB	T12G3.8	K08E4.1	125	chrIV	12050738	12051738	19	335
UTGB	F11A10.8	F11A10.5	90	chrIV	12093536	12094536	59	68
UTGB	C42C1.2	C42C1.14.1	201	chrIV	12268008	12269008	21	120
UTGB	C42C1.5	C42C1.13b	80	chrIV	12278180	12279180	128	231
UTGB	C42C1.12	C42C1.10.2	117	chrIV	12281959	12282959	14	107
UTGB	F28D1.7.2	F28D1.11	155	chrIV	12390787	12391787	275	18
UTGB	T23F6.3	T23F6.4.1	178	chrIV	12724300	12725300	13	236
UTGB	C39E9.11	C39E9.12.1	117	chrIV	13093340	13094340	366	43
UTGB	C39E9.14a.1	B0564.1b.1	201	chrIV	13098334	13099334	40	147
UTGB	F09E8.2b	F09E8.3	250	chrIV	13154010	13155010	340	13
UTGB	Y45F10D.10	Y45F10D.7	121	chrIV	13786396	13787396	28	118
UTGB	Y57G11C.34	Y57G11C.3a	147	chrIV	14767358	14768358	115	109
UTGB	Y57G11C.45	Y57G11C.9b	217	chrIV	14786399	14787399	48	399
UTGB	Y57G11C.12a.1	Y57G11C.13.1	123	chrIV	14797005	14798005	266	39
UTGB	Y41E3.4	Y41E3.7b	92	chrIV	15013197	15014197	18	210
UTGB	Y73F8A.25a	Y73F8A.26	144	chrIV	15473084	15474084	35	2680
UTGB	F38C2.7	F38C2.5	207	chrIV	16277305	16278305	387	631
UTGB	C35D6.2	C35D6.3	168	chrIV	16346346	16347346	14	30
UTGB	Y116A8C.9	Y116A8C.12.1	136	chrIV	16946399	16947399	3466	20
UTGB	Y116A8C.35	Y116A8C.36	103	chrIV	17118237	17119237	456	1042
UTGB	ZK550.6.1	F26D10.8	125	chrIV	17263390	17264390	67	13
UTGB	C49C3.9	C49C3.11	143	chrIV	17342362	17343362	17	30
UTGB	F11E6.2	F11E6.1a	107	chrIV	17476044	17477044	33	320
UTGB	K10B4.6a	K10B4.1	122	chrII	133734	134734	139	27
UTGB	B0432.10.1	B0432.4	100	chrII	285315	286315	31	95
UTGB	C24H12.5b	C24H12.4a	131	chrII	410552	411552	130	196
UTGB	W10D9.2	W10D9.1	196	chrII	453575	454575	36	20
UTGB	W07E6.1	W07E6.5	79	chrII	475720	476720	25	23
UTGB	W07E6.2	W07E6.4	97	chrII	484214	485214	30	95
UTGB	R07C3.11	R07C3.10	101	chrII	909234	910234	1904	483
UTGB	R07C3.14	R07C3.5	233	chrII	930560	931560	15	851
UTGB	M01D1.10	M01D1.1	94	chrII	1043604	1044604	939	38
UTGB	T13B5.7	W09B6.3	186	chrII	1120317	1121317	19	26
UTGB	Y57G7A.7	Y57G7A.2	173	chrII	1294753	1295753	56	61
UTGB	H17B01.4a.1	H17B01.1a	141	chrII	1501592	1502592	25	342
UTGB	K05F6.6	K05F6.3	100	chrII	1550148	1551148	422	42
UTGB	K05F6.7	K05F6.2	94	chrII	1555882	1556882	1574	464
UTGB	K05F6.8	K05F6.1	177	chrII	1567911	1568911	12	169
UTGB	ZC204.11	ZC204.3	220	chrII	1654454	1655454	185	416
UTGB	ZC204.14	ZC204.2	131	chrII	1663211	1664211	22	227
UTGB	F45C12.11	F45C12.10b	164	chrII	1706088	1707088	660	28
UTGB	C40A11.6	C40A11.2.2	100	chrII	2145172	2146172	514	68
UTGB	F54A3.6	F54A3.3	111	chrII	2232008	2233008	1004	103
UTGB	F43C11.9	F43C11.6	173	chrII	2340697	2341697	41	12
UTGB	F22E5.20	F22E5.1	190	chrII	2673206	2674206	174	96
UTGB	F29A7.6	F29A7.3	118	chrII	2752264	2753264	146	35
UTGB	F08D12.12.1	F08D12.1	130	chrII	2786834	2787834	10	40
UTGB	Y25C1A.8b	Y25C1A.5.2	206	chrII	3076650	3077650	50	34
UTGB	ZC239.20	ZC239.21	155	chrII	3206245	3207245	356	96
UTGB	Y49F6B.12	Y49F6B.5	113	chrII	3473471	3474471	44	22
UTGB	F19B10.10.1	F19B10.1	131	chrII	3681418	3682418	24	70
UTGB	F12E12.5	F12E12.4	157	chrII	3731411	3732411	115	384
UTGB	F12E12.7	T24E12.5	8	chrII	3751792	3752792	524	18
UTGB	C49D10.11	C49D10.3	64	chrII	3877536	3878536	50	28
UTGB	Y14H12A.2	Y14H12A.1	120	chrII	3990431	3991431	33	69
UTGB	C16A11.6	C16A11.2a.1	157	chrII	4237333	4238333	30	22
UTGB	ZK430.7.1	ZK430.1	101	chrII	4424505	4425505	78	1145
UTGB	M03A1.6e	F35D11.4.1	168	chrII	4601051	4602051	16	95
UTGB	R05F9.10	R05F9.1b	208	chrII	4903945	4904945	59	529
UTGB	ZK546.11	ZK546.5	170	chrII	4934439	4935439	63	15
UTGB	ZK546.15	ZK546.1d.2	192	chrII	4948876	4949876	211	37
UTGB	T27F7.3b.1	T27F7.1.1	90	chrII	4993470	4994470	24	80
UTGB	C04G6.7	C04G6.10	185	chrII	5101374	5102374	41	136
UTGB	C34F11.9a	EGAP2.2	216	chrII	5227467	5228467	268	23
UTGB	F09E5.10	F09E5.7.1	219	chrII	5351391	5352391	129	30
UTGB	F09E5.11	F09E5.17	145	chrII	5357870	5358870	19	19
UTGB	F09E5.13	F09E5.3.1	123	chrII	5372924	5373924	234	122
UTGB	F07F6.4.1	F07F6.2	74	chrII	5429374	5430374	102	119
UTGB	F12A10.6	F12A10.1	99	chrII	5496049	5497049	39	170
UTGB	C25H3.12	C25H3.6a	167	chrII	5660556	5661556	729	5797
UTGB	C25H3.9a	C25H3.4	108	chrII	5691072	5692072	62	30
UTGB	ZK1248.19	ZK1248.1	121	chrII	5838892	5839892	91	73
UTGB	R12C12.6a	R12C12.1a.1	130	chrII	6049181	6050181	22	65
UTGB	F21H12.6	F21H12.1	138	chrII	6097107	6098107	86	136
UTGB	C30B5.4	C30B5.2a	111	chrII	6196526	6197526	66	385
UTGB	T28D9.10.1	T28D9.2b	106	chrII	6489438	6490438	46	320
UTGB	C56E6.3a	C56E6.2	145	chrII	6522184	6523184	116	236
UTGB	F18C5.5	F18C5.9	122	chrII	6566215	6567215	153	24
UTGB	B0252.3b	B0252.2	163	chrII	6909223	6910223	37	34
UTGB	C52E12.4	C52E12.6	115	chrII	7022215	7023215	58	33
UTGB	ZK1127.9a	ZK1127.5	67	chrII	7049767	7050767	453	37
UTGB	T07F8.4	T07F8.3a	131	chrII	7131579	7132579	224	25
UTGB	F32A5.6	F32A5.1a	90	chrII	7251616	7252616	304	25
UTGB	R07G3.5	R07G3.3b	80	chrII	7598532	7599532	16	472
UTGB	F18A1.7.1	F18A1.5	106	chrII	7663879	7664879	21	97
UTGB	B0228.6	B0228.1	214	chrII	7754764	7755764	158	58
UTGB	C06A8.2	C06A8.5	75	chrII	7780725	7781725	557	142
UTGB	T01H3.1.1	T01H3.5	96	chrII	7878981	7879981	196	36
UTGB	C08B11.7	C08B11.8	98	chrII	8039047	8040047	120	46
UTGB	F10B5.8	F10B5.1.1	132	chrII	8142902	8143902	724	98
UTGB	F10B5.6.1	F10B5.7	99	chrII	8161875	8162875	68	141
UTGB	C26D10.1	C26D10.3	110	chrII	8324784	8325784	107	114
UTGB	F14E5.3	F14E5.5	137	chrII	8438519	8439519	38	158
UTGB	F28C6.3	F28C6.7a.1	101	chrII	8601960	8602960	1205	519
UTGB	T22C8.4	T22C8.5	162	chrII	8624869	8625869	27	26
UTGB	D2085.6	D2085.3	78	chrII	8661166	8662166	315	553
UTGB	T01B7.4	T01B7.5a	111	chrII	8715991	8716991	80	115
UTGB	T07D4.5	T07D4.4a	99	chrII	8883864	8884864	956	71
UTGB	F44G4.3	F44G4.4a	118	chrII	8997099	8998099	494	219
UTGB	T24B8.7b	T24B8.2	79	chrII	9054214	9055214	71	68
UTGB	C07H4.2	T24H10.1	197	chrII	9098657	9099657	77	200
UTGB	D2013.3	D2013.2	73	chrII	9319014	9320014	148	69
UTGB	D2013.1	D2013.10	100	chrII	9322553	9323553	83	3599
UTGB	F42A8.2.1	F42A8.3	180	chrII	9352308	9353308	78	46
UTGB	Y51B9A.3	Y51B9A.4	148	chrII	9407164	9408164	90	236
UTGB	E02H1.1.1	E02H1.3.2	121	chrII	9590682	9591682	38	492
UTGB	T15H9.6	T15H9.4	100	chrII	9610023	9611023	104	28
UTGB	T15H9.7	ZK1307.8.1	49	chrII	9623720	9624720	58	72
UTGB	Y53C12B.1	Y53C12B.3a	121	chrII	9745675	9746675	169	117
UTGB	R53.4.1	R53.6	114	chrII	9967945	9968945	100	57
UTGB	F33H1.1b	F33H1.2.1	103	chrII	10169023	10170023	46	109
UTGB	C07E3.3	C07E3.4	147	chrII	10359026	10360026	26	20
UTGB	R06F6.12	M106.1	107	chrII	10823662	10824662	37	480
UTGB	M106.4a	M106.5.1	122	chrII	10868378	10869378	54	210
UTGB	Y19D2B.1	R03D7.1	141	chrII	10925391	10926391	40	161
UTGB	F33A8.5.1	F33A8.6	84	chrII	11049500	11050500	212	81
UTGB	C09H10.2.1	C09H10.3	146	chrII	11096983	11097983	1130	137
UTGB	F40F8.10.1	F40F8.9	161	chrII	11126052	11127052	428	82
UTGB	VW02B12L.2	VW02B12L.3.1	90	chrII	11439800	11440800	17	219
UTGB	W02B12.2	W02B12.3a	127	chrII	11452617	11453617	161	284
UTGB	K12D12.2.1	K12D12.1	155	chrII	11874293	11875293	56	304
UTGB	Y57A10A.13	Y57A10A.14	105	chrII	12185445	12186445	24	136
UTGB	Y57A10A.22	Y57A10A.23	180	chrII	12239019	12240019	19	543
UTGB	Y57A10A.28	Y57A10A.29	55	chrII	12278928	12279928	18	26
UTGB	F15A4.9	F15A4.13	154	chrII	12482244	12483244	17	471
UTGB	T21B4.9	T21B4.17	229	chrII	12519314	12520314	16	10
UTGB	Y38E10A.6b	Y38E10A.7	1	chrII	12603463	12604463	33	52
UTGB	Y38E10A.23	Y46G5A.2	126	chrII	12679238	12680238	22	120
UTGB	Y46G5A.7	Y46G5A.8	162	chrII	12755653	12756653	106	729
UTGB	Y81G3A.1	Y81G3A.3	131	chrII	13083325	13084325	18	981
UTGB	F29C12.3	F29C12.4	92	chrII	13116704	13117704	19	11
UTGB	F32A11.2	F32A11.1	116	chrII	13156578	13157578	20	52
UTGB	F37B1.7	C31C9.1a	142	chrII	13631894	13632894	48	44
UTGB	Y54G9A.7	Y54G9A.6	113	chrII	13725359	13726359	54	226
UTGB	F08G2.3	F08G2.4	143	chrII	13829204	13830204	84	64
UTGB	F01D5.5	F01D5.6	191	chrII	14004380	14005380	12	37
UTGB	Y54G11A.10a	Y54G11A.11.1	132	chrII	14349097	14350097	79	151
UTGB	F26H11.1	F26H11.2c	128	chrII	14389613	14390613	112	27
UTGB	C13B4.2.1	K10H10.1	125	chrII	14488216	14489216	69	148
UTGB	F57C2.5.1	F57C2.6	210	chrII	14527602	14528602	85	14
UTGB	ZC101.1	K02B7.1	186	chrII	14686560	14687560	54	10
UTGB	Y54E2A.3	Y54E2A.4	174	chrII	14753841	14754841	29	14
UTGB	W01D2.3	W01D2.4	101	chrII	14804106	14805106	18	21
UTGB	Y53F4B.3	Y53F4B.4b	101	chrII	14968896	14969896	73	64
